# Supplementary material for: APOE genotype and biological age impact inter-omic associations related to bioenergetics
Source: Aging (Albany NY). 2025 May 3;17(5):1105–38. doi: 10.18632/aging.206243 (PMC12151507; doi:10.18632/aging.206243)
Supplement: Supplementary File 1 [file aging-17-206243-s003.xlsx]

## Sheet: Explainer
Supplementary File 1. contains the results data for the discovery cohort (Arivale) individual metabolite abundance analysis and corresponding enrichment analysis.
tab0: Expaliner tab
E2 defined as E2/E2 and E2/E3; E4 defined as E3/E4 and E4/E4; E3 defined as E3/E3
Bio_Young defined as biological age 7.5 years less than chron age, Bio_Old defined as biological age 7.5 years older than chronological age
896 metabolites from Metabolon after removing those with >20% missingness, RF imputation
p adj by FDR Benjamini-Hochberg, FDR set to 5%
tab1: log2(z-scored metabolite) = intercept + E2 + E4 + age + sex(M) + BMI + cholesterol_meds(Yes) + Genetic_Principal_Component_1 + Genetic_Principal_Component_2 + e
tab2: log2(z-scored metabolite) = intercept + Bio_Young + Bio_Old + age + sex(M) + BMI + cholesterol_meds(Yes) + Genetic_Principal_Component_1 + Genetic_Principal_Component_2 + e
tab3: enriched subpathways for pFDR < 0.1 significant results from models in tab1 & 2 (subpathways with pre-adjusted p < 0.05 reported)
tab4: enriched subpathways for results with pre-adjusted p < 0.05 from models in tab1 & tab2
tab5: female only analysis of model in tab1
tab6: male only analsis of model in tab1
tab7: female only analysis of model in tab2
tab8: male only analysis of model in tab2
tab9: enriched subpathways for results with pre-adjusted p < 0.05 from models in tabs 5-8

## Sheet: APOE Results
	col1	n	converged	Intercept	C(APOE_Status, Treatment(reference=1))[T.E2]	C(APOE_Status, Treatment(reference=1))[T.E4]	C(sex)[T.M]	meds_cholesterol[T.Yes]	age	BMI_CALC	PC1	PC2	Intercept_p	C(APOE_Status, Treatment(reference=1))[T.E2]_p	C(APOE_Status, Treatment(reference=1))[T.E4]_p	C(sex)[T.M]_p	meds_cholesterol[T.Yes]_p	age_p	BMI_CALC_p	PC1_p	PC2_p	E2_pval_adj	E4_pval_adj
184	X - 17690	1900	TRUE	0.376751	-0.351082	-0.0241875	0.388141	-0.0883203	-0.00714312	-0.00469231	6.72692	0.857594	0.00830243	1.29894e-06	0.65179	5.17461e-17	0.208771	0.000664535	0.177828	6.80529e-05	0.554496	0.00116385	0.971569
834	palmitoyl-arachidonoyl-glycerol (16:0/20:4) [2]*	1900	TRUE	-1.45399	0.309416	0.100859	0.242724	0.420247	-0.00314735	0.0497206	0.161153	1.7433	4.25221e-27	6.35465e-06	0.0464273	2.89378e-08	2.45826e-10	0.112465	1.37881e-51	0.919565	0.203551	0.00157585	0.63384
813	oleoyl-arachidonoyl-glycerol (18:1/20:4) [2]*	1900	TRUE	-1.41216	0.314776	0.133374	0.231421	0.519823	0.00405521	0.0352257	2.25778	2.92759	9.02467e-25	6.56835e-06	0.00974836	2.08889e-07	1.54111e-14	0.0447397	8.03713e-26	0.164979	0.0361128	0.00157585	0.545072
883	linoleoyl-arachidonoyl-glycerol (18:2/20:4) [1]*	1900	TRUE	-1.2912	0.312449	0.150306	0.235085	0.354161	-0.00248885	0.0428688	-3.2242	3.61919	3.89951e-21	7.03504e-06	0.00344511	1.18683e-07	1.46303e-07	0.216091	9.78448e-38	0.0464633	0.0092798	0.00157585	0.514003
187	oleoyl-arachidonoyl-glycerol (18:1/20:4) [1]*	1900	TRUE	-1.28503	0.303696	0.147611	0.241346	0.450185	0.00392724	0.0310202	3.06768	2.27606	2.55581e-20	1.74595e-05	0.00472258	8.92538e-08	4.93487e-11	0.0548748	6.3198e-20	0.0624039	0.107562	0.00312874	0.514003
22	X - 12847	1900	TRUE	0.0325319	-0.29673	0.0410604	0.389197	-0.100128	-0.00230072	-0.00137811	1.60883	4.45588	0.820649	4.72228e-05	0.446048	6.22269e-17	0.156352	0.275483	0.693839	0.343364	0.00225335	0.00705194	0.934338
662	thymol sulfate	1900	TRUE	-0.0397069	-0.292462	0.0138593	0.416476	-0.0789947	0.00164284	-0.00585683	1.08827	4.38995	0.781945	6.03342e-05	0.796965	3.57743e-19	0.263323	0.43604	0.0942458	0.521445	0.00261051	0.00772278	0.976775
806	stearoyl-arachidonoyl-glycerol (18:0/20:4) [1]*	1900	TRUE	-0.395721	0.287561	0.0631313	-0.00804482	0.407592	0.00606593	0.00013257	5.30774	4.29085	0.00601807	8.57965e-05	0.243218	0.863329	9.07616e-09	0.00418594	0.969913	0.00184786	0.00339143	0.00960921	0.85538
391	palmitoyl-docosahexaenoyl-glycerol (16:0/22:6) [1]*	1900	TRUE	-1.04324	0.279306	0.0390296	0.23036	0.337269	0.0103441	0.0132606	-4.80866	-1.39555	2.94514e-13	0.000120995	0.467231	6.80382e-07	1.65104e-06	8.61009e-07	0.000143685	0.00447598	0.336955	0.0120458	0.940761
727	oleoyl-oleoyl-glycerol (18:1/18:1) [1]*	1900	TRUE	-1.49367	0.267963	0.0961191	0.266481	0.172526	0.00786851	0.0333995	0.768088	-6.60109	2.65248e-26	0.000179903	0.0690046	5.36033e-09	0.012787	0.000143618	2.35394e-22	0.6447	3.97088e-06	0.0161193	0.709071
719	palmitoyl-oleoyl-glycerol (16:0/18:1) [1]*	1900	TRUE	-1.55245	0.258134	0.0612246	0.359573	0.20321	0.00235898	0.0438127	0.108812	-5.25911	2.50423e-29	0.000234586	0.237683	9.95225e-16	0.00279409	0.245243	1.13616e-38	0.946901	0.000179207	0.0191081	0.843686
796	stearoyl-arachidonoyl-glycerol (18:0/20:4) [2]*	1900	TRUE	-0.541428	0.266945	0.0501215	-0.0413852	0.165814	0.00409286	0.0107375	-2.54795	2.13158	0.000211033	0.000324595	0.360986	0.382608	0.0211555	0.0567593	0.00259463	0.140559	0.151277	0.0242364	0.916162
133	palmitoyl-oleoyl-glycerol (16:0/18:1) [2]*	1900	TRUE	-1.61784	0.243632	0.0651865	0.364602	0.186149	0.00198235	0.046874	-1.13462	-4.83199	5.90579e-32	0.000489894	0.206802	2.99877e-16	0.00596213	0.326839	2.31249e-44	0.485599	0.000547033	0.033765	0.798683
656	1-linoleoylglycerol (18:2)	1900	TRUE	-1.19337	0.229934	0.150014	0.234853	-0.0412333	0.0163491	0.00911896	-2.63315	-1.77163	6.58526e-17	0.00153838	0.00516297	4.01706e-07	0.557629	6.99795e-15	0.00888053	0.119265	0.222456	0.0890143	0.514003
596	1-stearyl-2-arachidonoyl-GPC (O-18:0/20:4)*	1900	TRUE	0.448813	0.23207	-0.110166	0.185743	-0.0303354	-0.0129654	0.00377934	6.88881	5.84874	0.00186588	0.00155045	0.0420074	7.2292e-05	0.669297	9.82624e-10	0.282955	5.45389e-05	6.66969e-05	0.0890143	0.63384
290	palmitoyl dihydrosphingomyelin (d18:0/16:0)*	1900	TRUE	0.0280692	-0.224107	0.047279	-0.317214	-0.573721	0.0139425	-0.017247	1.17521	-0.405212	0.841974	0.00173534	0.371168	3.77244e-12	1.25438e-16	1.63274e-11	5.1356e-07	0.480529	0.777084	0.0890143	0.916162
254	palmitoyl-linoleoyl-glycerol (16:0/18:2) [2]*	1900	TRUE	-1.45028	0.220238	0.1005	0.419142	0.0787668	0.000291447	0.0434108	-4.49573	-4.92608	1.23554e-25	0.00176343	0.0534277	1.11686e-20	0.248215	0.886247	9.67185e-38	0.00610761	0.000470476	0.0890143	0.653972
529	palmitoyl sphingomyelin (d18:1/16:0)	1900	TRUE	-0.204706	-0.219713	0.0297691	-0.0633817	-0.794715	0.0195125	-0.0205944	-0.0931772	2.73379	0.139175	0.00178823	0.56683	0.158092	1.97572e-31	8.99444e-22	1.07164e-09	0.954633	0.0520399	0.0890143	0.960734
472	palmitoleoyl-arachidonoyl-glycerol (16:1/20:4) [2]*	1900	TRUE	-1.05115	0.222169	0.155391	0.106987	0.334703	0.00110757	0.0300723	2.34854	1.49022	1.33945e-13	0.00208036	0.00356717	0.0202072	1.68528e-06	0.595772	3.95148e-18	0.162198	0.301927	0.0938069	0.514003
783	linoleoyl-linoleoyl-glycerol (18:2/18:2) [1]*	1900	TRUE	-1.05046	0.220716	0.176698	0.343869	0.0392501	-0.00113698	0.0323015	-9.50457	-5.83138	9.96208e-14	0.0020939	0.000857884	5.95213e-14	0.572201	0.583817	6.65239e-21	1.26852e-08	4.83254e-05	0.0938069	0.514003
668	hydroxypalmitoyl sphingomyelin (d18:1/16:0(OH))**	1900	TRUE	-0.233009	-0.214271	0.0539627	-0.156247	-0.814974	0.0181422	-0.0161009	-6.73937	1.37156	0.0931818	0.00238297	0.300477	0.000519804	8.44993e-33	6.07277e-19	1.9843e-06	4.06502e-05	0.330996	0.101673	0.880426
18	oleoyl-oleoyl-glycerol (18:1/18:1) [2]*	1900	TRUE	-1.4843	0.21649	0.0794723	0.249953	0.154292	0.00722859	0.034893	-0.654667	-6.5599	6.75642e-26	0.00252686	0.133498	4.69039e-08	0.0262784	0.000490922	3.6811e-24	0.69487	4.76373e-06	0.102912	0.76377
10	diacylglycerol (16:1/18:2 [2], 16:0/18:3 [1])*	1900	TRUE	-1.55785	0.208653	0.112154	0.11381	0.173481	-0.000451701	0.0520936	-0.825061	-7.62998	5.19666e-30	0.00270457	0.0291098	0.0103753	0.0100375	0.822409	7.35437e-55	0.610465	4.17406e-08	0.105361	0.592781
793	lignoceroyl sphingomyelin (d18:1/24:0)	1900	TRUE	-0.239785	-0.21132	-0.0311998	0.119098	-0.593009	0.0126286	-0.0104498	2.25217	1.65127	0.0920498	0.00348424	0.559387	0.00989678	2.59646e-17	1.59217e-09	0.00261836	0.181134	0.25377	0.130078	0.960277
853	oleoyl-linoleoyl-glycerol (18:1/18:2) [1]	1900	TRUE	-1.33095	0.208088	0.156428	0.36142	0.0533659	0.00417296	0.0331082	-6.10826	-6.46001	4.86246e-21	0.00378477	0.00321989	3.30565e-15	0.443309	0.044735	8.24745e-22	0.000261603	6.99346e-06	0.135646	0.514003
415	sphingomyelin (d18:1/24:1, d18:2/24:0)*	1900	TRUE	-0.17947	-0.205527	-0.0259056	-0.130902	-0.661906	0.0155918	-0.0141108	0.244879	0.175842	0.202291	0.00406335	0.624041	0.00414579	1.26465e-21	4.91183e-14	3.97113e-05	0.883107	0.902193	0.139102	0.971569
193	oleoyl-linoleoyl-glycerol (18:1/18:2) [2]	1900	TRUE	-1.37139	0.20579	0.12736	0.306578	0.0677244	0.00365748	0.0363617	-4.95278	-6.87762	3.09342e-22	0.0041917	0.0164701	2.34496e-11	0.330649	0.0785665	5.70889e-26	0.00307815	1.71815e-06	0.139102	0.545072
87	3-hydroxy-2-ethylpropionate	1900	TRUE	-0.655179	0.201873	0.00775706	0.455333	0.150476	0.00644021	0.00435	11.2037	0.012147	2.92274e-06	0.0045811	0.882786	1.27004e-23	0.029135	0.00176986	0.203168	1.39914e-11	0.993195	0.146595	0.983351
323	1-oleoylglycerol (18:1)	1900	TRUE	-1.06447	0.201934	0.112147	0.318256	0.0556779	0.014537	0.00640245	0.96286	-2.7583	7.90052e-14	0.00528466	0.0360477	5.71628e-12	0.427244	3.90893e-12	0.0654604	0.567863	0.0568302	0.158004	0.63384
91	palmitoyl-linoleoyl-glycerol (16:0/18:2) [1]*	1900	TRUE	-1.17326	0.196941	0.106539	0.49055	0.0533278	-0.00201234	0.0367897	-6.93172	-4.78543	3.08278e-17	0.00529032	0.0411724	1.39757e-27	0.435635	0.32463	1.95022e-27	2.48833e-05	0.000704817	0.158004	0.63384
597	2-methylbutyrylcarnitine (C5)	1900	TRUE	-1.41862	0.181655	-0.031145	0.896789	0.244819	0.00353359	0.0308774	-3.09365	-0.970192	3.43876e-28	0.00553671	0.519781	4.16283e-102	0.000113594	0.062153	9.03936e-23	0.0424508	0.458896	0.160029	0.949816
106	1-(1-enyl-stearoyl)-2-arachidonoyl-GPE (P-18:0/20:4)*	1900	TRUE	0.214938	0.203002	-0.0910732	0.133874	0.124094	-0.00148982	-0.00738843	-4.54724	4.88991	0.14241	0.00640898	0.0978832	0.00485607	0.0853671	0.489224	0.0387542	0.00872327	0.00102786	0.179451	0.724821
446	palmitoyl-sphingosine-phosphoethanolamine (d18:1/16:0)	1900	TRUE	0.0494448	-0.19488	0.0214847	-0.12961	-0.552182	0.0128918	-0.0186077	1.7345	0.247436	0.726283	0.00662812	0.685412	0.00467262	1.99534e-15	5.36267e-10	6.66304e-08	0.299337	0.863177	0.179964	0.971569
315	4-methylcatechol sulfate	1900	TRUE	0.0470083	-0.196757	-0.0785894	-0.0653995	-0.0344924	0.00946764	-0.0153013	4.93828	-0.28184	0.746075	0.00765398	0.149389	0.164909	0.629339	9.17101e-06	1.55783e-05	0.00404121	0.848539	0.201705	0.781914
704	1-palmityl-2-arachidonoyl-GPC (O-16:0/20:4)*	1900	TRUE	0.309768	0.192422	-0.0824406	0.354404	0.0672667	-0.0108182	0.00219386	3.36663	5.19571	0.0313371	0.00850527	0.127073	3.13995e-14	0.342306	3.16154e-07	0.532017	0.0480043	0.00038238	0.217735	0.749367
403	choline phosphate	1900	TRUE	1.01924	0.191157	0.0167359	0.138827	-0.0326266	-0.0130609	-0.0165111	-3.17384	0.533665	1.47415e-12	0.00900993	0.756974	0.00296417	0.645386	6.91368e-10	2.61398e-06	0.0625443	0.715483	0.224247	0.976775
404	1-(1-enyl-stearoyl)-2-dihomo-linolenoyl-GPE (P-18:0/20:3)*	1900	TRUE	-0.361176	0.190412	-0.125718	0.0361248	-0.00372658	0.00567762	0.0028665	3.28554	1.09089	0.0138371	0.0106661	0.0225086	0.447895	0.958855	0.00849405	0.423283	0.0584419	0.464574	0.241367	0.545072
571	X - 11852	1900	TRUE	-0.333644	-0.190092	0.0394096	0.105273	-0.0138315	0.00520554	0.00175164	1.02181	3.53489	0.0230645	0.010849	0.474738	0.0270905	0.848242	0.0158915	0.624846	0.55643	0.0178708	0.241367	0.944808
84	myristoyl-linoleoyl-glycerol (14:0/18:2) [1]*	1900	TRUE	-1.44911	0.179656	0.0974165	0.235521	0.193785	0.000103998	0.0456569	-1.89114	-6.25594	1.964e-25	0.0110069	0.062066	1.77335e-07	0.00463778	0.959426	2.70947e-41	0.250355	9.5993e-06	0.241367	0.680403
209	hydroquinone sulfate	1900	TRUE	-0.392653	0.188897	0.0743741	0.186759	0.050442	-0.00044741	0.0107161	0.0248985	-3.58842	0.00725258	0.0110313	0.175614	8.25765e-05	0.483502	0.835159	0.00266825	0.988519	0.0157862	0.241367	0.794697
115	1-(1-enyl-palmitoyl)-2-arachidonoyl-GPC (P-16:0/20:4)*	1900	TRUE	0.397485	0.187415	-0.0885104	0.282059	-0.00865738	-0.00593128	-0.00777507	2.93134	7.45194	0.0061607	0.0110447	0.104314	2.07665e-09	0.903541	0.00543603	0.0280832	0.0877895	4.38362e-07	0.241367	0.72554
123	palmitoleoyl-linoleoyl-glycerol (16:1/18:2) [1]*	1900	TRUE	-1.49952	0.175504	0.132031	0.0310064	0.179467	8.05279e-05	0.0502018	-0.873134	-8.74084	1.83896e-27	0.012403	0.0109014	0.488897	0.00829913	0.968366	3.3467e-50	0.59314	4.79372e-10	0.264598	0.545072
216	4-hydroxyphenylacetylglutamine	1900	TRUE	-1.89953	0.171112	0.0662512	0.284105	0.125945	0.0233879	0.0218136	0.505725	-2.10081	8.74463e-43	0.0150868	0.202846	2.59079e-10	0.0647957	1.62496e-30	1.09144e-10	0.757701	0.135791	0.314366	0.798683
664	1-stearyl-2-docosapentaenoyl-GPC (O-18:0/22:5n3)*	1900	TRUE	0.822837	0.176632	-0.0246186	0.075047	-0.194348	-0.00750165	-0.0171527	11.0157	1.21726	1.0139e-08	0.0155368	0.648089	0.107278	0.00598778	0.000382193	9.85123e-07	9.10118e-11	0.404497	0.316385	0.971569
566	arachidate (20:0)	1900	TRUE	0.674209	0.173025	0.0704028	0.144893	-0.097533	0.00664521	-0.0383702	1.8613	2.0631	2.09264e-06	0.0165858	0.187066	0.00167229	0.163267	0.00147039	1.81226e-28	0.268329	0.153264	0.330242	0.798683
304	cholesterol	1900	TRUE	-0.919595	-0.171889	0.0552804	0.0270697	-0.708719	0.0193555	0.00307089	1.58002	0.131794	8.82543e-11	0.0170566	0.299133	0.556173	3.18507e-24	1.61753e-20	0.374668	0.346301	0.927145	0.332233	0.880426
617	sphingomyelin (d18:2/24:1, d18:1/24:2)*	1900	TRUE	-0.162356	-0.166745	0.0222628	-0.39657	-0.649045	0.0116243	-0.00490406	-3.47472	1.36865	0.243625	0.0184571	0.670271	1.64423e-18	2.83734e-21	1.36307e-08	0.148858	0.0349502	0.3336	0.3506	0.971569
894	tetradecanedioate (C14-DC)	1900	TRUE	-0.0229849	0.175239	0.0220349	-0.0442552	0.0700867	0.00261939	-0.00420737	3.81342	-5.07717	0.875533	0.0187821	0.689241	0.35254	0.331938	0.224712	0.239908	0.0280737	0.000665225	0.3506	0.971569
168	2-aminooctanoate	1900	TRUE	0.331553	-0.166501	-0.042117	0.437554	-0.00897654	0.00733041	-0.0291237	1.1089	-2.02254	0.0180315	0.0194415	0.423688	6.51111e-22	0.896513	0.000375999	1.66643e-17	0.503827	0.155851	0.355502	0.931087
463	1-docosapentaenoyl-GPC (22:5n6)*	1900	TRUE	0.364209	0.173078	0.0715117	0.0358226	-0.135107	-0.00872622	0.000728506	5.67327	2.77458	0.0129157	0.0200879	0.193621	0.450982	0.0610111	5.09247e-05	0.838488	0.00106479	0.0624549	0.3558	0.798683
874	glycochenodeoxycholate glucuronide (1)	1900	TRUE	0.200296	0.16844	-0.0424565	0.434755	0.0994601	-0.00935144	0.00206181	-2.27602	2.64393	0.160613	0.020252	0.428371	6.1362e-21	0.157	8.37815e-06	0.553869	0.177859	0.0684842	0.3558	0.934338
663	lactosyl-N-palmitoyl-sphingosine (d18:1/16:0)	1900	TRUE	1.09063	-0.163605	0.0669171	-0.0574975	-0.624505	-0.00977779	-0.0182548	11.04	-0.817878	4.76414e-15	0.0207728	0.20059	0.203028	8.15156e-20	1.78505e-06	7.70596e-08	2.06992e-11	0.56338	0.355959	0.798683
36	1-(1-enyl-stearoyl)-2-arachidonoyl-GPC (P-18:0/20:4)	1900	TRUE	0.277183	0.169587	-0.116362	0.204762	-0.000260775	0.000187991	-0.0126747	1.32682	9.79314	0.0560787	0.0214517	0.032698	1.35853e-05	0.997087	0.929776	0.000342719	0.439607	3.14359e-11	0.355959	0.63384
231	3-phosphoglycerate	1900	TRUE	0.023138	0.171435	0.0635313	0.259506	-0.0312319	-0.00120368	-0.0032825	-0.186016	1.48609	0.874651	0.0214529	0.2487	4.92222e-08	0.665339	0.576725	0.358974	0.914643	0.318913	0.355959	0.860369
58	sphingomyelin (d18:2/14:0, d18:1/14:1)*	1900	TRUE	-1.5829	-0.142181	-0.012655	-0.815865	-0.434626	0.0177749	0.0396751	5.37255	-1.95211	2.56227e-38	0.0221566	0.782876	5.62264e-94	5.22398e-13	4.80156e-23	2.38793e-40	0.000205008	0.116364	0.360951	0.976775
479	sphingomyelin (d18:1/22:1, d18:2/22:0, d16:1/24:1)*	1900	TRUE	-0.809372	-0.161286	-0.0435058	-0.357167	-0.642293	0.0171973	0.00841404	1.64758	3.24442	6.03875e-09	0.0225842	0.40513	2.54771e-15	6.91252e-21	4.29151e-17	0.0132079	0.317061	0.0218331	0.361347	0.926119
360	1-stearoyl-2-arachidonoyl-GPE (18:0/20:4)	1900	TRUE	-0.399441	0.165651	0.0836551	-0.244475	0.353725	-0.00104649	0.0162578	-0.875455	-0.916292	0.0054363	0.0232975	0.12103	1.56287e-07	5.70798e-07	0.620339	3.5209e-06	0.606604	0.530453	0.366221	0.74401
129	margarate (17:0)	1900	TRUE	-0.618251	0.164504	-0.0167326	-0.178818	0.127028	0.00714009	0.0112641	-4.36105	-0.579199	2.19067e-05	0.0262638	0.759666	0.000154079	0.0764709	0.000855862	0.00152576	0.0113954	0.695679	0.405731	0.976775
776	sarcosine	1900	TRUE	-0.0757395	-0.164753	-0.103033	0.105138	0.0390802	-0.00319423	0.00816254	-7.09169	0.182655	0.6059	0.0272208	0.0616093	0.0272609	0.588662	0.138887	0.0226616	4.45184e-05	0.902586	0.411057	0.680403
788	1-(1-enyl-stearoyl)-2-oleoyl-GPE (P-18:0/18:1)	1900	TRUE	0.367361	0.163063	-0.0762245	-0.0245138	-0.0137004	0.00707328	-0.0247781	-2.19612	0.909678	0.0116229	0.0275261	0.163216	0.603713	0.848394	0.000951106	3.03127e-12	0.202349	0.538773	0.411057	0.781914
332	androsterone sulfate	1900	TRUE	1.18822	0.149281	-0.0320592	0.498367	0.0743349	-0.0223587	-0.0111874	-6.09812	-7.40789	1.0479e-18	0.0290464	0.525791	3.46084e-30	0.261809	1.29884e-29	0.000655266	0.000128234	6.12092e-08	0.426649	0.949816
166	eicosenoate (20:1)	1900	TRUE	-0.200906	0.159703	0.0304838	-0.274256	0.023354	0.00954395	-0.006321	-3.64372	-0.578884	0.167443	0.0308294	0.576976	6.27932e-09	0.744444	8.1826e-06	0.0750338	0.0343507	0.695591	0.439012	0.963162
48	X - 11483	1900	TRUE	-0.105908	0.158963	0.0394165	0.0794203	-0.0419874	0.00662638	-0.00966365	7.80937	4.36675	0.466427	0.0314763	0.47039	0.0922599	0.557517	0.00193956	0.00645183	5.66236e-06	0.00313719	0.439012	0.942885
837	glycodeoxycholate 3-sulfate	1900	TRUE	0.505151	0.159063	-0.00718281	0.0530075	-0.0109501	-0.00299855	-0.0141302	-1.67831	0.742457	0.000523032	0.0316209	0.895501	0.261852	0.878605	0.161385	6.97917e-05	0.330079	0.616015	0.439012	0.983351
732	glycosyl ceramide (d18:2/24:1, d18:1/24:2)*	1900	TRUE	0.411686	-0.15325	0.020217	-0.22354	-0.683883	0.00759435	-0.0206499	-1.13756	0.886964	0.00338732	0.031848	0.701568	9.3584e-07	4.69858e-23	0.000236487	1.69733e-09	0.493802	0.534591	0.439012	0.971569
159	gamma-glutamylleucine	1900	TRUE	-1.66927	0.130201	-0.0345273	1.07676	0.171785	0.00317297	0.0385471	-1.68063	-1.94983	1.38798e-43	0.0336097	0.44573	8.22768e-167	0.00380352	0.0734892	3.14987e-39	0.23882	0.111679	0.456277	0.934338
785	N-acetylleucine	1900	TRUE	-1.52074	0.147294	0.0317713	0.539949	0.173466	0.0101968	0.0275761	3.62878	5.02208	1.63508e-28	0.0347749	0.537732	7.97106e-34	0.0102731	4.3868e-07	1.83269e-16	0.0255038	0.000320431	0.465049	0.952189
394	trigonelline (N'-methylnicotinate)	1900	TRUE	0.253517	-0.149115	0.0148068	-0.0442197	-0.14184	0.0153895	-0.0339283	9.75411	-1.2942	0.0696917	0.0357838	0.777844	0.329403	0.0392505	6.92593e-14	2.51536e-23	3.67503e-09	0.362346	0.470237	0.976775
537	1-(1-enyl-stearoyl)-GPE (P-18:0)*	1900	TRUE	0.564485	0.153079	-0.0341448	0.2653	-0.107308	-0.00185089	-0.0202496	-5.74553	2.21208	9.06795e-05	0.036736	0.528349	1.41996e-08	0.13065	0.382693	8.64121e-09	0.000759721	0.131323	0.470237	0.951802
75	phosphatidylethanolamine (P-18:1/20:4, P-16:0/22:5n3)*	1900	TRUE	0.318371	0.154974	-0.0705673	0.220457	-0.100545	-0.00219986	-0.00995508	-5.66522	1.79988	0.0292095	0.0367373	0.198034	3.24371e-06	0.161827	0.30544	0.00519218	0.00104034	0.225239	0.470237	0.798683
118	tiglylcarnitine (C5:1-DC)	1900	TRUE	-0.56811	0.146583	-0.010782	0.62748	0.0821838	0.0105305	-0.00717094	-0.309095	0.172753	4.28702e-05	0.0377785	0.836176	4.13646e-44	0.229241	2.49284e-07	0.0342753	0.850774	0.902593	0.471861	0.976775
778	X - 23780	1900	TRUE	0.328799	-0.153688	-0.0163945	0.179474	-0.234942	-0.000712881	-0.0110154	1.6536	0.081245	0.0240171	0.0379174	0.764424	0.00014617	0.00105349	0.739277	0.00194093	0.337438	0.956252	0.471861	0.976775
780	pyridoxal	1900	TRUE	-0.159729	-0.152943	-0.0485815	0.0378367	0.082248	-0.000256781	0.00623283	-0.608775	2.36616	0.277018	0.04055	0.378604	0.427326	0.255521	0.905387	0.0820968	0.726233	0.113181	0.488306	0.919286
621	tricosanoyl sphingomyelin (d18:1/23:0)*	1900	TRUE	-0.767384	-0.147566	-0.0218289	-0.183547	-0.50005	0.0173732	0.00356312	1.05681	-0.364839	6.78569e-08	0.0411462	0.68267	6.91641e-05	9.08533e-13	9.55955e-17	0.304371	0.529929	0.800734	0.488306	0.971569
341	X - 11299	1900	TRUE	0.121545	0.149383	0.0173821	0.0447267	0.020248	0.00661139	-0.0174335	9.54007	6.59901	0.398949	0.04136	0.748027	0.338651	0.775305	0.00180441	7.08448e-07	2.20245e-08	6.63901e-06	0.488306	0.976775
291	acetylcarnitine (C2)	1900	TRUE	-0.736308	0.150566	0.028165	0.0507065	0.0185832	0.0132529	0.00230431	-5.65477	-4.08565	4.01531e-07	0.0414188	0.605657	0.281961	0.794987	5.48271e-10	0.515608	0.0010035	0.00566732	0.488306	0.971569
199	lactate	1900	TRUE	-0.826998	0.147664	0.0182045	0.355439	0.271499	0.00578466	0.0128253	-3.50649	-4.16867	8.43693e-09	0.0430161	0.735643	2.33434e-14	0.000122566	0.00614229	0.000251147	0.039033	0.00429182	0.497354	0.976775
288	tridecenedioate (C13:1-DC)*	1900	TRUE	-0.733718	0.148725	-0.0191222	0.230041	0.0208374	0.00455008	0.0148651	2.50963	-2.28063	4.07104e-07	0.0433379	0.725155	9.78702e-07	0.770105	0.0326284	2.59225e-05	0.143107	0.121408	0.497354	0.976775
223	stearate (18:0)	1900	TRUE	-0.34491	0.150213	0.00681669	-0.163933	0.0714283	0.00470583	0.00555765	-3.89517	1.31992	0.0186765	0.0438515	0.901484	0.000569079	0.322461	0.0290699	0.120336	0.0247841	0.375954	0.497354	0.983351
862	phenylacetylcarnitine	1900	TRUE	-0.546928	0.146953	-0.0646908	0.0326159	0.364174	0.0117187	-0.00271414	-3.30006	-0.559642	0.000160098	0.0459598	0.234426	0.48772	3.29305e-07	3.77188e-08	0.442586	0.0542372	0.703971	0.502089	0.841623
493	3-hydroxyoctanoate	1900	TRUE	-0.0433134	0.148199	0.0108647	0.0789565	0.112897	0.003553	-0.00660079	-7.04579	0.98716	0.7671	0.046152	0.843169	0.0960546	0.116844	0.0984485	0.0643094	4.66772e-05	0.506689	0.502089	0.976775
375	palmitate (16:0)	1900	TRUE	-0.600928	0.145313	0.0259681	-0.328889	0.0990237	0.00319567	0.0192607	-3.33095	-1.76385	2.91219e-05	0.046697	0.630474	1.75607e-12	0.161728	0.130538	3.97874e-08	0.0501998	0.227437	0.502089	0.971569
62	glycodeoxycholate	1900	TRUE	-0.327691	0.148461	0.0531941	-0.0652822	0.0911428	0.00530047	0.00176044	-2.77514	-1.3878	0.0257052	0.046751	0.334899	0.170726	0.20756	0.0141251	0.623292	0.110375	0.352737	0.502089	0.902068
207	1-(1-enyl-stearoyl)-2-docosapentaenoyl-GPE (P-18:0/22:5n3)*	1900	TRUE	-0.0212932	0.148222	-0.0788327	0.15512	-0.0737609	0.00662333	-0.0121786	-1.04131	3.6931	0.884736	0.0470709	0.152922	0.00113184	0.307676	0.0021621	0.00067748	0.549074	0.0133853	0.502089	0.781914
522	phosphoethanolamine	1900	TRUE	0.831458	0.145188	0.000399929	-0.143489	-0.036691	-0.0152853	-0.00178336	-1.31363	0.0124975	9.23062e-09	0.0484127	0.994129	0.00224399	0.606605	6.8435e-13	0.613553	0.443083	0.993223	0.510327	0.995254
648	1,2-dipalmitoyl-GPC (16:0/16:0)	1900	TRUE	0.367749	-0.141788	-0.00987685	0.00753291	-0.530505	0.00437418	-0.0175555	6.48457	1.28697	0.0103043	0.0516181	0.854414	0.871311	5.57137e-14	0.0379434	5.1722e-07	0.00013178	0.377145	0.523407	0.976775
452	gluconate	1900	TRUE	-1.11845	0.138184	0.0580013	-0.418572	-0.0936955	0.0156832	0.0178459	5.70961	-0.203175	1.24204e-15	0.0517827	0.269221	2.71875e-20	0.173379	2.34626e-14	1.6746e-07	0.000557326	0.88632	0.523407	0.87385
51	1-stearoyl-2-dihomo-linolenoyl-GPE (18:0/20:3n3 or 6)*	1900	TRUE	-1.07376	0.138192	0.082962	-0.200965	0.32307	0.000490295	0.0371514	0.212958	-4.6423	1.98107e-14	0.0526503	0.11539	1.01146e-05	2.91432e-06	0.812158	1.95657e-27	0.897946	0.00113675	0.523407	0.74401
592	valine	1900	TRUE	-1.22384	0.132808	-0.046299	0.746833	0.0747334	0.00118069	0.0311213	-4.51193	-2.351	1.40831e-19	0.0532606	0.361813	5.14544e-65	0.261518	0.552549	3.92415e-21	0.00479855	0.087177	0.523407	0.916162
682	behenoyl sphingomyelin (d18:1/22:0)*	1900	TRUE	-0.932074	-0.140808	-0.0439031	0.0462439	-0.579592	0.0149685	0.0108418	1.81798	0.346826	8.35377e-11	0.0535535	0.415301	0.320604	2.34229e-16	1.30865e-12	0.00196003	0.284401	0.812108	0.523407	0.930021
13	S-allylcysteine	1900	TRUE	0.679193	-0.141821	-0.0412342	0.224056	-0.171719	-0.00626619	-0.014843	-1.87834	-1.41732	2.85376e-06	0.0544396	0.449159	1.93344e-06	0.0162109	0.00330975	2.75152e-05	0.273917	0.336598	0.523407	0.934338
885	hexadecenedioate (C16:1-DC)*	1900	TRUE	0.332817	0.143676	0.0573066	0.0653455	0.0249337	-0.00115247	-0.0119789	0.312448	-1.66268	0.023799	0.0548486	0.299981	0.171288	0.730853	0.594473	0.000853965	0.857672	0.266645	0.523407	0.880426
781	propionylcarnitine (C3)	1900	TRUE	-1.61628	0.128653	-0.0278545	0.797828	0.161394	0.0105465	0.0278596	-7.94621	-1.94242	1.58412e-34	0.0549324	0.573826	1.3243e-77	0.0129262	5.36431e-08	4.79351e-18	3.54658e-07	0.147406	0.523407	0.961962
26	3-methylglutaconate	1900	TRUE	0.169543	0.137457	-0.0157386	-0.216691	0.655504	0.00575333	-0.0167377	8.95208	0.861796	0.229376	0.0551719	0.766359	2.18391e-06	3.72259e-21	0.00553344	1.15158e-06	8.15472e-08	0.547833	0.523407	0.976775
861	beta-hydroxyisovalerate	1900	TRUE	-0.262201	0.133752	-0.0709656	0.706539	0.0512499	-0.00545963	0.00904663	-3.51832	3.23822	0.0564136	0.0554952	0.169101	1.46126e-56	0.448746	0.00689373	0.00697401	0.0305004	0.0204608	0.523407	0.781914
183	gentisate	1900	TRUE	0.409134	-0.141303	0.0463889	-0.0464692	-0.0346126	0.00424567	-0.0208871	4.21708	2.23583	0.00504578	0.0566973	0.397169	0.326207	0.629882	0.047798	4.41779e-09	0.0145795	0.131707	0.529175	0.919286
127	pro-hydroxy-pro	1900	TRUE	-0.265309	-0.139325	0.0404064	0.1705	-0.122657	0.00848508	-0.00682626	8.60532	0.916185	0.0674625	0.058822	0.458305	0.000291754	0.0859255	6.96015e-05	0.0537987	5.37315e-07	0.53449	0.543346	0.935664
68	docosapentaenoate (n6 DPA; 22:5n6)	1900	TRUE	0.162623	0.138486	-0.0357872	-0.228116	0.148885	-0.00784347	0.00977732	-1.39649	2.18014	0.264341	0.0614353	0.513028	1.38946e-06	0.0379082	0.000250644	0.00594725	0.417907	0.141026	0.561191	0.949816
27	5alpha-androstan-3beta,17beta-diol disulfate	1900	TRUE	-0.244079	0.118007	-0.0199823	1.02843	0.226541	-0.00968984	0.0101397	-1.29786	-6.15012	0.0502343	0.0625041	0.669471	1.13268e-142	0.000222883	1.24431e-07	0.000856147	0.378921	1.2154e-06	0.561191	0.971569
527	dehydroepiandrosterone sulfate (DHEA-S)	1900	TRUE	1.87065	0.112297	-0.0183152	0.636885	-0.226153	-0.0384159	-0.00848495	-4.77452	-2.82095	5.95491e-56	0.0626717	0.68115	1.90974e-61	0.000108766	2.22334e-107	0.00339096	0.000675575	0.0194011	0.561191	0.971569
794	methionine sulfoxide	1900	TRUE	0.0721325	-0.137911	-0.0567234	-0.0361257	0.0510791	0.00228556	-0.00535398	0.0353597	5.37959	0.622327	0.0638768	0.302308	0.446994	0.478618	0.288457	0.133996	0.98372	0.000302013	0.561191	0.880426
824	phenylacetylglutamine	1900	TRUE	-0.579918	0.132495	-0.00373251	-0.0957114	0.168414	0.0193184	-0.0126429	9.53878	1.5784	3.93263e-05	0.0645529	0.943819	0.0364614	0.0152897	1.21487e-20	0.000238825	1.09505e-08	0.270989	0.561191	0.98883
619	branched-chain, straight-chain, or cyclopropyl 12:1 fatty acid*	1900	TRUE	0.287775	0.135898	-0.00230974	-0.352244	0.00970146	2.12293e-05	-0.00578268	-6.26934	1.25523	0.046722	0.0645949	0.966093	6.17987e-14	0.891666	0.992038	0.101406	0.000250526	0.393466	0.561191	0.993822
383	epiandrosterone sulfate	1900	TRUE	1.13326	0.12281	-0.030704	0.731019	0.115479	-0.0176462	-0.0206798	0.678126	-4.92123	5.24698e-18	0.0651769	0.532656	2.84203e-66	0.0734424	5.24993e-20	9.9127e-11	0.66187	0.000220625	0.561191	0.952189
34	nonadecanoate (19:0)	1900	TRUE	0.0967335	0.136107	-0.0390799	-0.104451	-0.0645418	0.00903704	-0.01744	0.101671	1.574	0.508055	0.0668826	0.476413	0.0275897	0.369682	2.60377e-05	1.00271e-06	0.953118	0.289413	0.561191	0.944808
374	gamma-glutamyl-alpha-lysine	1900	TRUE	-1.24943	0.131971	-0.0608926	0.432347	0.0263463	0.00972651	0.0221389	-0.776873	-4.71297	1.18969e-18	0.0669161	0.252555	5.27003e-21	0.705716	3.04524e-06	1.52657e-10	0.643185	0.00107111	0.561191	0.860453
753	10-nonadecenoate (19:1n9)	1900	TRUE	-0.590642	0.133016	-0.000598865	-0.401427	0.109703	0.00482247	0.0172575	-0.50427	-2.32429	3.75888e-05	0.0677686	0.99112	5.84098e-18	0.119911	0.0220805	7.95904e-07	0.766156	0.110583	0.561191	0.995254
670	methyl-4-hydroxybenzoate sulfate	1900	TRUE	0.222482	0.130912	0.0655528	-0.540441	0.0882004	0.00610881	-0.0122901	-6.27182	4.35197	0.114809	0.0678762	0.215957	3.53266e-32	0.20411	0.00322962	0.000356203	0.000171985	0.00241035	0.561191	0.821098
517	1-(1-enyl-stearoyl)-2-docosahexaenoyl-GPE (P-18:0/22:6)*	1900	TRUE	0.554205	0.127538	-0.0886429	0.0665913	0.0450961	0.0139541	-0.044176	-10.762	3.94032	5.66524e-05	0.0682699	0.0863447	0.13587	0.505711	5.37753e-12	1.59365e-39	3.90099e-11	0.00486247	0.561191	0.709714
275	butyrylcarnitine (C4)	1900	TRUE	-1.5223	0.131162	0.0473813	0.167689	0.191797	0.00934119	0.034355	-3.3521	-5.92023	7.99522e-27	0.0690876	0.37414	0.000271624	0.00606548	7.63909e-06	3.46107e-23	0.0459993	4.09682e-05	0.56275	0.919052
471	sebacate (C10-DC)	1900	TRUE	-0.202634	0.134841	0.0659139	-0.0238349	0.0200488	0.0112487	-0.0128569	1.93624	-2.01596	0.166112	0.0697931	0.230297	0.615581	0.780763	1.70792e-07	0.000316445	0.263438	0.175337	0.563375	0.841623
476	gamma-glutamylisoleucine*	1900	TRUE	-2.15943	0.113774	0.00314003	0.867297	0.218608	0.00739397	0.0510784	-0.761237	-0.597136	7.81212e-68	0.0711952	0.94627	5.69818e-103	0.000345112	5.05702e-05	7.11732e-64	0.604123	0.63593	0.566563	0.98883
319	N-stearoyl-sphinganine (d18:0/18:0)*	1900	TRUE	-1.87164	0.120771	-0.038963	-0.0415382	0.255662	0.00111574	0.0641828	-2.60283	-5.27244	1.44287e-45	0.0720288	0.432182	0.332392	8.44523e-05	0.565654	3.03369e-88	0.0958771	8.6321e-05	0.566563	0.934338
550	4-allylcatechol sulfate	1900	TRUE	0.368539	-0.133428	0.0664905	0.0703603	-0.0992172	0.00338518	-0.0195097	1.7378	0.0387692	0.0115806	0.072085	0.225128	0.137322	0.167373	0.11473	4.29703e-08	0.314364	0.979157	0.566563	0.839351
397	glycosyl-N-palmitoyl-sphingosine (d18:1/16:0)	1900	TRUE	-0.0884404	-0.13202	-0.0102354	0.00671388	-0.62605	0.00447906	-0.000886193	3.24621	2.54196	0.541426	0.0728635	0.850716	0.886366	1.62014e-18	0.0354228	0.801964	0.0581863	0.0842497	0.567702	0.976775
731	(S)-3-hydroxybutyrylcarnitine	1900	TRUE	-0.959744	0.128641	0.051173	-0.0979548	0.210146	0.0125092	0.0124773	-5.75471	-2.79334	2.35913e-11	0.078016	0.342733	0.0355289	0.00295842	3.15171e-09	0.000369944	0.000709141	0.0557396	0.585761	0.902068
556	aspartate	1900	TRUE	-1.00159	0.125139	0.00624975	0.48047	0.0776572	-0.00247301	0.0326147	-3.19401	-4.22125	9.31472e-13	0.0791911	0.905553	4.6291e-26	0.260762	0.230487	1.57013e-21	0.0543109	0.00307392	0.585761	0.985319
676	1-(1-enyl-palmitoyl)-2-arachidonoyl-GPE (P-16:0/20:4)*	1900	TRUE	0.259191	0.129256	-0.070168	0.248974	-0.018352	-0.00625903	-0.00161572	-7.61091	2.08092	0.0741468	0.0797281	0.197957	1.23872e-07	0.797302	0.00335759	0.648197	9.35808e-06	0.158453	0.585761	0.798683
238	cysteinylglycine	1900	TRUE	0.339879	0.129383	0.028687	0.306695	0.15078	-0.00471998	-0.00987071	6.37979	-1.17747	0.0195105	0.080203	0.599593	8.19665e-11	0.0353084	0.0273761	0.00543078	0.000211235	0.426052	0.585761	0.971569
420	pentadecanoate (15:0)	1900	TRUE	-0.379441	0.128729	-0.0311423	-0.326579	0.0760509	0.00390919	0.0106193	3.36386	-1.91158	0.00879397	0.0802935	0.566887	3.62177e-12	0.286106	0.0663755	0.00265189	0.0496506	0.194152	0.585761	0.960734
846	glutarylcarnitine (C5-DC)	1900	TRUE	-0.305385	0.123188	-0.00787524	0.638702	-0.138651	0.00411592	-0.00472967	11.1728	2.04314	0.027717	0.0805951	0.87984	1.026e-45	0.0423376	0.043602	0.162295	1.0013e-11	0.147415	0.585761	0.983351
285	pyroglutamylvaline	1900	TRUE	-1.08491	-0.127825	0.014762	0.1398	-0.0182638	0.0100204	0.0200351	-0.696812	2.93131	5.14166e-14	0.0809259	0.785014	0.00278594	0.796836	2.25315e-06	1.20884e-08	0.682803	0.0454023	0.585761	0.976775
405	X - 12411	1900	TRUE	-1.26096	-0.124271	0.0431559	0.435356	0.0649376	0.0165692	0.010229	5.91791	-2.46923	2.40849e-19	0.0811746	0.412427	1.0576e-21	0.346825	9.19273e-16	0.0027885	0.000361264	0.0832219	0.585761	0.930021
174	2-hydroxy-3-methylvalerate	1900	TRUE	0.040247	0.114226	0.0553825	0.909057	0.13301	-0.0155671	0.0114169	-0.384049	-0.599598	0.755408	0.0819137	0.253635	2.54948e-104	0.0364994	2.50111e-16	0.000292227	0.801643	0.648009	0.585761	0.860822
832	1-palmitoyl-2-arachidonoyl-GPE (16:0/20:4)*	1900	TRUE	-0.151883	0.127246	0.081227	-0.302134	0.349808	-0.00141003	0.00893909	1.08764	-0.545929	0.291368	0.0819653	0.132912	9.78856e-11	7.95608e-07	0.505258	0.0109158	0.523107	0.709094	0.585761	0.76377
136	10-heptadecenoate (17:1n7)	1900	TRUE	-0.720422	0.12304	0.0260038	-0.543864	0.134207	0.00571568	0.0220399	0.595237	-3.79118	2.35445e-07	0.0823727	0.619289	2.50522e-33	0.0504601	0.00528296	9.07087e-11	0.71815	0.0074555	0.585761	0.971569
255	leucine	1900	TRUE	-1.14212	0.108532	-0.00587138	1.03817	0.124624	-0.00282056	0.0307413	-6.38675	-2.44046	3.1483e-20	0.0849157	0.899622	5.61287e-147	0.0411229	0.121708	2.8371e-24	1.33413e-05	0.0527823	0.591164	0.983351
145	ascorbic acid 3-sulfate*	1900	TRUE	-0.343747	-0.123111	0.0950539	0.120432	-0.103793	0.0177729	-0.0198213	10.7341	2.41304	0.0145032	0.0849377	0.0718346	0.00828762	0.13377	8.2131e-18	7.57123e-09	1.10849e-10	0.0914002	0.591164	0.709071
495	dodecadienoate (12:2)*	1900	TRUE	0.1347	0.126837	0.0632612	-0.0667284	-0.0802483	0.000865297	-0.00566578	-12.9121	-0.105274	0.352755	0.0851117	0.245147	0.155881	0.260764	0.684732	0.109131	5.1447e-14	0.943046	0.591164	0.858016
822	deoxycholate	1900	TRUE	-0.302527	0.128326	0.0533815	0.115522	0.0457129	-0.00095905	0.00970499	-2.27024	-2.75164	0.0397369	0.0860783	0.333874	0.0154894	0.527892	0.657468	0.00684965	0.192156	0.0657716	0.59281	0.902068
40	1-(1-enyl-oleoyl)-GPE (P-18:1)*	1900	TRUE	0.56706	0.126454	-0.0198098	0.102521	-0.165857	-0.00471239	-0.0129445	-6.95627	1.78391	9.44714e-05	0.086672	0.716431	0.0295563	0.0203535	0.0273255	0.000259009	5.16954e-05	0.22695	0.59281	0.976775
730	1-(1-enyl-palmitoyl)-2-oleoyl-GPE (P-16:0/18:1)*	1900	TRUE	0.542949	0.124831	-0.0422262	0.0385928	-0.147492	0.00222361	-0.0229792	-4.13465	1.10304	0.000187967	0.0911109	0.439231	0.413177	0.0393161	0.298202	9.24844e-11	0.0162362	0.455453	0.610108	0.934338
755	1-pentadecanoyl-GPC (15:0)*	1900	TRUE	0.377626	0.1225	0.0390302	0.258189	-0.22422	0.00418845	-0.0240265	8.633	-3.50115	0.00814434	0.0912195	0.466425	2.44846e-08	0.00141534	0.0459177	5.1787e-12	3.18228e-07	0.01581	0.610108	0.940761
593	serotonin	1900	TRUE	0.874087	0.123097	-0.0815292	-0.0859663	-0.0801734	-0.0149733	-0.00360514	-5.08346	3.26199	1.09718e-09	0.0912439	0.130062	0.0646403	0.256142	1.23911e-12	0.302855	0.0027397	0.0252628	0.610108	0.761672
790	pyruvate	1900	TRUE	-0.888024	0.123832	0.0111505	0.181371	0.277143	0.0046293	0.0194333	-0.814589	-4.19324	8.19105e-10	0.0919743	0.837296	0.000110412	9.88827e-05	0.0294464	3.61781e-08	0.63401	0.00433636	0.610437	0.976775
854	1-(1-enyl-stearoyl)-2-docosahexaenoyl-GPC (P-18:0/22:6)*	1900	TRUE	0.725911	0.115922	-0.0560642	-0.0531292	-0.0848191	0.0159688	-0.0518636	-7.48562	4.73551	9.09211e-08	0.0931072	0.27171	0.227934	0.204645	1.28729e-15	3.33129e-55	3.20382e-06	0.000605023	0.61121	0.87385
311	inosine	1900	TRUE	-0.462952	0.1247	0.0408012	0.0951419	0.0257451	-0.00135469	0.0168183	-1.59192	-0.173799	0.00157351	0.0938817	0.458182	0.0452417	0.721047	0.529297	2.51941e-06	0.358332	0.907077	0.61121	0.935664
440	alpha-hydroxyisovalerate	1900	TRUE	0.0793612	0.117577	0.050718	0.65094	0.0457772	-0.011886	0.00763702	-0.819228	0.50157	0.565824	0.0941373	0.328443	9.22322e-48	0.501058	4.93431e-09	0.0235177	0.616407	0.721097	0.61121	0.902068
414	1-stearoyl-2-docosapentaenoyl-GPE (18:0/22:5n6)*	1900	TRUE	-0.836258	0.11717	0.0727302	-0.292313	0.284647	-0.00620818	0.0417826	-1.06979	0.586765	1.38451e-09	0.0949223	0.16064	6.71444e-11	2.81107e-05	0.00222449	2.45534e-35	0.512546	0.675885	0.611873	0.781914
343	gamma-glutamyl-epsilon-lysine	1900	TRUE	-0.439547	0.122485	-0.0889452	0.120034	0.0192985	0.000574674	0.0132772	2.97641	-4.53408	0.00273338	0.100403	0.10639	0.0116588	0.789293	0.7899	0.000207482	0.0864007	0.00236311	0.635696	0.72554
687	glucose	1900	TRUE	-1.72006	0.114462	-0.127298	0.205346	0.29966	0.00925119	0.0418147	-4.1353	-0.274621	4.29025e-36	0.10048	0.0134265	3.90551e-06	9.02762e-06	4.45888e-06	7.5392e-36	0.0108121	0.84382	0.635696	0.545072
342	taurocholate	1900	TRUE	-0.407241	0.121946	0.0200923	-0.0172428	0.0936344	0.00161483	0.0107098	-7.50207	-0.0341036	0.00534518	0.100746	0.71438	0.716188	0.193266	0.452507	0.00267725	1.44699e-05	0.981693	0.635696	0.976775
259	gamma-glutamylhistidine	1900	TRUE	-0.0634985	0.121618	0.0470371	0.180072	-0.0633159	-0.000153595	-0.000378827	3.85442	-1.4355	0.666045	0.103841	0.39456	0.000161407	0.382019	0.943394	0.91595	0.026827	0.337172	0.646429	0.919286
232	adenosine 5'-monophosphate (AMP)	1900	TRUE	0.249166	0.118506	-0.0552229	-0.116395	-0.095844	-0.0106351	0.0115667	-6.19929	3.1623	0.0831325	0.104876	0.306437	0.0125869	0.175743	4.89316e-07	0.000976943	0.000268907	0.030515	0.646429	0.880426
335	ectoine	1900	TRUE	-0.0811664	-0.120377	-0.000690921	0.256496	-0.00170124	0.000582305	-0.0012219	5.98263	1.60725	0.578586	0.105025	0.989954	6.26968e-08	0.981132	0.786363	0.731792	0.000540022	0.279264	0.646429	0.995254
272	1-palmityl-GPC (O-16:0)	1900	TRUE	0.751247	0.11594	0.0546007	0.378874	-0.266946	-0.000663567	-0.0304587	2.23424	0.601476	9.72946e-08	0.105423	0.30209	1.14238e-16	0.000118824	0.74873	7.96399e-19	0.180213	0.674545	0.646429	0.880426
280	adipoylcarnitine (C6-DC)	1900	TRUE	-1.49602	0.115956	-0.0218141	0.250693	0.100025	0.0113655	0.0298595	2.67441	-4.51372	3.87939e-26	0.106767	0.681328	4.68581e-08	0.15091	4.64185e-08	5.07383e-18	0.1101	0.0016969	0.646429	0.971569
487	3-hydroxyisobutyrate	1900	TRUE	-0.312732	0.118866	-0.0267169	0.253739	0.107501	-0.00435509	0.0145503	-2.91686	-1.15697	0.0314957	0.107714	0.624621	7.4772e-08	0.133142	0.0416352	4.10316e-05	0.090011	0.433795	0.646429	0.971569
246	X - 13728	1900	TRUE	-0.596896	-0.117284	0.0268488	0.0076962	-0.0909153	0.00848596	0.00708341	13.0257	-4.74747	3.22905e-05	0.108028	0.618545	0.868776	0.198409	5.83576e-05	0.0431893	1.77341e-14	0.00114527	0.646429	0.971569
870	octadecenedioylcarnitine (C18:1-DC)*	1900	TRUE	-0.370094	0.11766	-0.00590895	0.378743	8.22049e-05	0.0101983	-0.00975599	-0.173353	-0.750822	0.0102387	0.108219	0.913065	5.48937e-16	0.999076	1.49121e-06	0.00553125	0.919039	0.608358	0.646429	0.98551
636	1-arachidonylglycerol (20:4)	1900	TRUE	-0.550946	0.115036	0.0917358	-0.255457	0.0695293	0.01191	0.000777432	1.94991	4.92472	0.000111665	0.112416	0.0866679	3.3414e-08	0.321929	1.33984e-08	0.823168	0.247812	0.000680364	0.66361	0.709714
869	X - 24337	1900	TRUE	-1.33148	0.108215	-0.00137461	0.532943	0.100238	-0.00601347	0.0493318	3.77934	2.1006	3.55959e-23	0.112797	0.978251	2.03163e-34	0.129422	0.00231966	3.04358e-51	0.0173772	0.123844	0.66361	0.995254
169	EDTA	1900	TRUE	-0.515335	-0.116709	-0.0791483	0.374372	-0.0311161	-0.000601879	0.015916	-4.48907	-0.746431	0.000384232	0.113584	0.146429	1.84302e-15	0.663194	0.777899	6.96027e-06	0.00894936	0.612919	0.66361	0.780954
39	3-aminoisobutyrate	1900	TRUE	0.0766722	-0.114264	0.015872	0.138823	-0.128216	0.0105641	-0.0217886	9.61011	-2.8613	0.590249	0.114322	0.766578	0.00265175	0.0673717	4.50633e-07	3.55945e-10	1.17023e-08	0.0480686	0.66361	0.976775
770	erucate (22:1n9)	1900	TRUE	0.479497	0.113735	0.0317328	0.118296	-0.0258248	0.0118195	-0.039539	-2.75974	1.09992	0.00072808	0.114799	0.551526	0.0101814	0.711638	1.47258e-08	3.32545e-30	0.100283	0.445807	0.66361	0.956905
893	2-hydroxyoctanoate	1900	TRUE	0.272209	-0.116445	-0.0357009	0.0411763	-0.121197	0.00159777	-0.0117223	0.996899	-0.336103	0.0634608	0.118234	0.516841	0.386802	0.093232	0.458727	0.00105297	0.565675	0.82165	0.673927	0.949816
594	dodecanedioate (C12-DC)	1900	TRUE	0.0085572	0.115044	0.0536671	-0.179505	-0.00597386	0.00874535	-0.013766	6.10102	-2.69052	0.953021	0.119117	0.325142	0.00013919	0.933417	4.21967e-05	0.000102478	0.000385481	0.0684351	0.673927	0.901943
722	iminodiacetate (IDA)	1900	TRUE	-0.126535	-0.116617	-0.0981577	-0.0339789	0.00377425	-0.000169781	0.00653108	-2.15253	-0.260128	0.391252	0.119999	0.0765382	0.477888	0.95857	0.937635	0.0697052	0.217729	0.862354	0.673927	0.709714
442	sphingomyelin (d18:2/23:0, d18:1/23:1, d17:1/24:1)*	1900	TRUE	-0.642416	-0.108681	-0.0598587	-0.446448	-0.538304	0.0207358	-0.00293969	3.72157	1.52703	3.04324e-06	0.120213	0.246751	1.52541e-23	1.93443e-15	1.21017e-24	0.381288	0.022292	0.275065	0.673927	0.859016
738	6-oxopiperidine-2-carboxylate	1900	TRUE	-0.687325	0.113497	-0.000300008	0.0646047	0.161593	0.00377484	0.015937	2.57659	5.1725	1.83062e-06	0.121067	0.995575	0.166824	0.0226859	0.074702	5.77011e-06	0.130631	0.000412234	0.673927	0.995575
575	docosadienoate (22:2n6)	1900	TRUE	-0.359754	0.115382	0.0234337	-0.165413	0.0161516	0.00470795	0.0064331	-6.00776	-1.31688	0.0140918	0.121316	0.67022	0.000502269	0.822842	0.0288818	0.071964	0.000530804	0.37671	0.673927	0.971569
416	5alpha-androstan-3alpha,17beta-diol monosulfate (1)	1900	TRUE	0.463304	0.105252	-0.0509888	0.600588	0.165136	-0.0201852	0.00944641	-7.27561	-8.74744	0.000546884	0.122301	0.311017	2.12558e-43	0.012322	1.27087e-24	0.00386671	4.48383e-06	1.36264e-10	0.673927	0.880426
437	sphingosine	1900	TRUE	-0.299425	0.114148	0.0457242	0.168491	-0.0116011	-0.0030468	0.012918	-2.62735	0.284025	0.0401978	0.123787	0.404076	0.000372294	0.871716	0.155616	0.000285434	0.128137	0.848176	0.673927	0.926119
44	maltotriose	1900	TRUE	0.0584055	0.113191	-0.0418518	-0.0819346	-0.0344254	-0.0107425	0.0175871	-4.02704	0.225914	0.686976	0.124371	0.441914	0.0814015	0.629465	4.62922e-07	6.57283e-07	0.0188683	0.878141	0.673927	0.934338
745	1-(1-enyl-stearoyl)-2-linoleoyl-GPE (P-18:0/18:2)*	1900	TRUE	0.409116	0.112155	-0.00582882	0.0353799	-0.292856	0.00833196	-0.0281188	-7.19937	-1.24229	0.00441378	0.124604	0.913981	0.44788	3.47597e-05	8.02734e-05	1.05388e-15	2.29531e-05	0.395103	0.673927	0.98551
287	nicotinamide	1900	TRUE	0.647497	0.111785	0.0213759	0.112684	0.111573	-0.0169254	0.00345373	-5.11339	-0.276172	6.25101e-06	0.124857	0.691235	0.0153664	0.113797	9.58463e-16	0.32329	0.00256822	0.849662	0.673927	0.971569
111	hydantoin-5-propionate	1900	TRUE	-1.95542	0.10557	0.00252049	0.341953	-0.0264974	0.00872098	0.0497715	5.71295	-1.30571	9.94093e-47	0.12727	0.9607	1.00773e-14	0.692741	1.33428e-05	1.05112e-50	0.000393536	0.345732	0.677833	0.992278
214	N-acetylarginine	1900	TRUE	-0.923406	0.107339	0.0496935	0.176933	0.103221	0.019497	-0.0045602	10.3821	10.0867	3.04652e-11	0.128573	0.340985	8.69025e-05	0.131365	1.40324e-21	0.178643	2.72953e-10	9.36678e-13	0.677833	0.902068
512	3-methyl-2-oxovalerate	1900	TRUE	-0.108206	0.0997993	-0.0383951	0.875646	0.231914	-0.0147598	0.0161594	-2.39309	-4.09909	0.40355	0.129538	0.429931	1.98777e-96	0.000276168	9.21831e-15	3.17005e-07	0.118464	0.00185366	0.677833	0.934338
510	trans-urocanate	1900	TRUE	0.684193	-0.111481	0.00392765	-0.317801	0.00528815	-0.00935298	-0.0033763	0.414652	-0.233323	2.27189e-06	0.129587	0.942385	1.29465e-11	0.940831	1.10459e-05	0.33895	0.80867	0.87399	0.677833	0.98883
720	1-stearoyl-2-docosapentaenoyl-GPC (18:0/22:5n6)*	1900	TRUE	-0.475464	0.108132	0.0202592	-0.128666	0.107325	-0.0102049	0.0350569	1.59993	4.43589	0.000707169	0.129621	0.700754	0.00472442	0.120433	7.65055e-07	1.37541e-24	0.335472	0.00188209	0.677833	0.971569
64	X - 11632	1900	TRUE	-0.303386	0.112525	0.00595597	0.221243	0.168909	0.00455729	-0.00127177	2.55807	-0.858767	0.0383935	0.130742	0.913795	3.24347e-06	0.0191911	0.0343842	0.722007	0.140076	0.564236	0.677833	0.98551
429	(R)-3-hydroxybutyrylcarnitine	1900	TRUE	-0.701191	0.111907	0.0350404	0.056739	0.138439	0.00725555	0.0106892	-4.42839	-1.88997	1.56391e-06	0.131482	0.522711	0.230903	0.0540734	0.000724292	0.00269036	0.0103618	0.202856	0.677833	0.949816
641	7-alpha-hydroxy-3-oxo-4-cholestenoate (7-Hoca)	1900	TRUE	-1.11431	-0.110035	0.0051972	0.332941	-0.192068	0.0059868	0.0263636	-2.70118	-2.54612	8.53488e-15	0.131633	0.923221	8.88351e-13	0.00659061	0.00457605	5.28381e-14	0.111916	0.0811476	0.677833	0.987601
461	1-(1-enyl-palmitoyl)-GPC (P-16:0)*	1900	TRUE	0.970469	0.104112	0.0551546	0.34995	-0.293739	0.00400504	-0.0456838	3.1477	2.48759	1.72393e-12	0.136406	0.285612	4.41752e-15	1.43868e-05	0.0476652	3.35451e-42	0.0531207	0.0752459	0.692341	0.880426
9	N-acetylaspartate (NAA)	1900	TRUE	0.730848	-0.106381	-0.0348557	-0.465577	-0.240493	0.00543062	-0.0271276	3.38138	0.998815	2.03069e-07	0.136655	0.509258	1.89006e-24	0.000513585	0.00863235	2.65655e-15	0.0421636	0.484798	0.692341	0.949816
620	(16 or 17)-methylstearate (a19:0 or i19:0)	1900	TRUE	-0.238374	0.110986	-0.0563281	-0.250179	0.108846	0.00384433	0.00484467	0.444397	0.718006	0.104353	0.136768	0.306769	1.48455e-07	0.131949	0.0748326	0.17607	0.798037	0.630358	0.692341	0.880426
225	oleate/vaccenate (18:1)	1900	TRUE	-0.482672	0.107713	0.0589267	-0.448586	0.0275524	0.00842519	0.00798518	-2.71018	-3.24998	0.000722027	0.137629	0.271658	3.43794e-22	0.695015	5.96685e-05	0.0218638	0.108616	0.025125	0.692785	0.87385
154	bilirubin (E,E)*	1900	TRUE	0.0256426	0.106669	0.0251077	0.437827	-0.0393051	0.00958007	-0.0236399	2.41734	-3.40044	0.856349	0.13841	0.636913	1.60488e-21	0.572992	4.22689e-06	7.8966e-12	0.149237	0.018206	0.692823	0.971569
359	taurodeoxycholate	1900	TRUE	-0.23805	0.10988	0.0150673	-0.135835	0.176134	0.00465744	0.000683308	-1.29721	0.225302	0.104135	0.139931	0.784139	0.00425513	0.0145818	0.030572	0.848364	0.454198	0.879736	0.696543	0.976775
749	sphingomyelin (d18:1/20:0, d16:1/22:0)*	1900	TRUE	-0.988896	-0.10763	-0.0402616	-0.0740932	-0.362653	0.0140018	0.0149648	1.93503	1.6319	8.01465e-12	0.143055	0.458434	0.11424	3.50192e-07	4.53407e-11	2.21923e-05	0.258115	0.266966	0.696624	0.935664
462	p-cresol glucuronide*	1900	TRUE	-0.244988	0.105208	-0.0347114	-0.224022	0.210141	0.0155964	-0.0163258	8.32464	0.835987	0.0831471	0.143151	0.51325	1.03844e-06	0.00253509	6.25441e-14	2.21432e-06	6.49493e-07	0.560819	0.696624	0.949816
553	argininate*	1900	TRUE	-0.617524	0.1055	0.0216155	0.487125	0.104918	0.00108758	0.0124275	2.18596	1.87842	1.46847e-05	0.145187	0.686256	5.8078e-26	0.134763	0.6037	0.000350844	0.19484	0.194749	0.696624	0.971569
438	linoleoyl-linolenoyl-glycerol (18:2/18:3) [2]*	1900	TRUE	-1.04368	0.105942	0.153395	0.232383	0.0792158	0.000709484	0.0306772	-3.32846	-3.93177	3.1812e-13	0.145563	0.00434508	5.69667e-07	0.261249	0.736193	1.65377e-18	0.0495428	0.00692909	0.696624	0.514003
194	gamma-glutamyltyrosine	1900	TRUE	-2.15882	0.0993189	-0.000862867	0.558923	0.0404382	0.0177603	0.0382792	-0.0207326	0.617355	7.04026e-58	0.146563	0.986381	1.65699e-37	0.541714	2.87001e-19	2.14839e-31	0.989615	0.651893	0.696624	0.995254
67	glycocholate	1900	TRUE	-0.480113	0.107584	0.0257072	0.127253	-0.0200599	-0.000663127	0.0157562	-8.52037	-1.69888	0.000996705	0.146699	0.638832	0.00716079	0.779969	0.757164	9.53292e-06	7.95018e-07	0.25192	0.696624	0.971569
46	isoleucine	1900	TRUE	-1.16083	0.0915276	-0.0110579	0.978585	0.147444	-0.00553322	0.0368823	-7.97205	-1.6931	8.87528e-21	0.146943	0.812536	2.26384e-130	0.0158611	0.0024386	4.23421e-34	5.76547e-08	0.179824	0.696624	0.976775
320	taurine	1900	TRUE	0.519948	0.107944	0.0314153	-0.133669	-0.0925016	-0.00326544	-0.0113821	1.62311	0.806944	0.000389106	0.147304	0.568149	0.00493518	0.199847	0.129699	0.00145774	0.349336	0.588117	0.696624	0.960734
162	3-hydroxydecanoate	1900	TRUE	-0.0286168	0.107745	0.00716195	-0.065611	0.031594	0.00404045	-0.00540647	-7.53762	1.41159	0.845108	0.147791	0.896402	0.167348	0.661281	0.060638	0.130312	1.36803e-05	0.343142	0.696624	0.983351
132	2-arachidonoyl-GPC (20:4)*	1900	TRUE	0.314198	0.104034	-0.0013046	0.313201	0.277178	0.00201543	-0.0209747	10.5759	5.08408	0.027185	0.150117	0.980514	1.14108e-11	7.54776e-05	0.335199	1.50361e-09	3.3094e-10	0.000438239	0.696624	0.995254
546	phenylalanyltryptophan	1900	TRUE	-0.629724	0.106754	-0.103797	-0.104892	-0.0866968	0.00690379	0.0129559	1.09353	-2.52336	1.63484e-05	0.150547	0.0585249	0.0269044	0.228095	0.00131086	0.000278667	0.527072	0.0893607	0.696624	0.680403
121	androstenediol (3beta,17beta) monosulfate (1)	1900	TRUE	1.03072	0.0883648	-0.00801086	0.766281	-0.138373	-0.0338876	0.0114959	-5.39664	-3.91521	1.59998e-17	0.150659	0.86003	6.73548e-85	0.0201587	6.3843e-81	9.82776e-05	0.000163325	0.00145532	0.696624	0.978029
714	1-stearoyl-2-linoleoyl-GPI (18:0/18:2)	1900	TRUE	-0.142893	-0.101893	0.104563	-0.351447	-0.718671	0.0111807	-0.00638043	-0.997086	-3.18964	0.307382	0.152089	0.0466891	1.0026e-14	1.83958e-25	5.56728e-08	0.0617408	0.547212	0.0250057	0.696624	0.63384
195	N-acetyl-beta-alanine	1900	TRUE	-0.402601	0.102814	0.0406406	0.507695	0.114177	0.00125304	0.00407552	0.0114517	-3.93656	0.0045497	0.153942	0.445623	2.75399e-28	0.102144	0.54809	0.239086	0.994558	0.00635186	0.696624	0.934338
515	hexanoylcarnitine (C6)	1900	TRUE	-1.01592	0.104501	-0.0229279	0.0401479	0.0901402	0.0109912	0.0166193	-11.263	-2.53501	1.87671e-12	0.153979	0.672062	0.390871	0.204267	2.18419e-07	2.32628e-06	4.13062e-11	0.083831	0.696624	0.971569
681	docosahexaenoylcarnitine (C22:6)*	1900	TRUE	-0.112696	0.1009	0.0135314	0.297536	0.125682	0.0179726	-0.0317297	-7.59163	-1.13842	0.418601	0.154161	0.795918	4.61178e-11	0.06689	1.7301e-18	1.01502e-20	4.12698e-06	0.421537	0.696624	0.976775
584	1-arachidonoyl-GPC (20:4n6)*	1900	TRUE	0.47421	0.102823	0.0129808	0.363306	0.208098	-6.64775e-05	-0.0233014	9.01794	5.28673	0.000843101	0.154362	0.807735	3.17298e-15	0.00292229	0.974608	1.77452e-11	8.09037e-08	0.000251259	0.696624	0.976775
219	cysteine s-sulfate	1900	TRUE	-0.513293	0.101274	0.0707535	0.268891	0.123066	0.0188815	-0.0194682	8.77016	-1.31889	0.000246445	0.154669	0.1784	3.22067e-09	0.0741896	4.6446e-20	1.20412e-08	1.1994e-07	0.354137	0.696624	0.798683
713	4-allylphenol sulfate	1900	TRUE	0.103813	-0.103226	-0.005607	0.214938	-0.0711023	0.0110601	-0.0247976	1.67799	1.93462	0.467692	0.155334	0.916806	3.56719e-06	0.312297	1.42075e-07	1.15606e-12	0.321167	0.183081	0.696624	0.98551
492	N,N,N-trimethyl-5-aminovalerate	1900	TRUE	-1.26076	0.102662	0.0160654	-0.0463647	0.328579	0.0140995	0.0190889	-1.40323	-1.83137	7.6634e-19	0.155496	0.76355	0.31492	2.69024e-06	1.55237e-11	3.7657e-08	0.404365	0.205261	0.696624	0.976775
841	sphingosine 1-phosphate	1900	TRUE	0.267415	0.105501	0.0424819	0.17028	-0.201918	-0.000572318	-0.0104848	4.24233	-0.110857	0.067918	0.156432	0.439929	0.000339156	0.00510882	0.790441	0.00334819	0.014382	0.940656	0.697328	0.934338
561	X - 11795	1900	TRUE	-0.231496	-0.102819	0.125152	0.405224	0.0318127	0.00404895	-0.0052437	4.25811	-3.97245	0.107193	0.159163	0.020379	3.54027e-18	0.652925	0.0553143	0.134738	0.0122715	0.00654207	0.705988	0.545072
520	3-methylxanthine	1900	TRUE	-0.257515	-0.101571	0.012752	-0.048021	-0.0830004	0.0091642	-0.00546881	15.303	-4.36002	0.0706079	0.160553	0.81155	0.298658	0.236509	1.20773e-05	0.115533	1.0841e-19	0.00260182	0.706357	0.976775
390	dihomo-linoleate (20:2n6)	1900	TRUE	-0.357112	0.102318	0.0594408	-0.376123	0.0912408	0.00123428	0.0145477	-7.95401	-2.28366	0.0128699	0.160822	0.270222	6.7048e-16	0.19672	0.558731	3.27759e-05	2.83928e-06	0.117658	0.706357	0.87385
786	4-ethylcatechol sulfate	1900	TRUE	0.4648	0.100456	0.0794987	-0.0230646	0.0728084	0.00932433	-0.0337591	9.27854	-1.9888	0.0010325	0.162852	0.134996	0.61569	0.296398	7.55282e-06	1.52521e-22	3.09097e-08	0.167211	0.709524	0.765547
587	N-palmitoyl-sphingosine (d18:1/16:0)	1900	TRUE	-1.01581	-0.102519	0.0547251	0.0654159	-0.152464	0.0138659	0.0124626	-0.544478	-3.92767	2.17581e-12	0.163127	0.313674	0.163281	0.0322604	7.02844e-11	0.000413085	0.750389	0.00755986	0.709524	0.880426
892	3-hydroxyhexanoate	1900	TRUE	-0.289901	0.10374	0.0354074	0.0782998	0.0459952	0.00605183	-0.00172712	-4.28409	-1.76231	0.0482907	0.16437	0.520669	0.100134	0.524473	0.00504834	0.629638	0.0136497	0.237636	0.711476	0.949816
666	1-stearoyl-2-docosahexaenoyl-GPE (18:0/22:6)*	1900	TRUE	-0.894015	0.0988083	0.0665952	-0.248857	0.458028	0.0119985	0.0116419	-8.95599	-1.02392	2.34641e-10	0.168177	0.208741	5.40491e-08	4.25729e-11	7.27802e-09	0.000718886	8.10043e-08	0.475273	0.720182	0.802713
399	N-formylphenylalanine	1900	TRUE	0.0390412	-0.103189	0.0404616	-0.083836	-0.0943747	-0.00235108	0.00423593	-2.43029	-2.53464	0.791467	0.169092	0.465544	0.0800742	0.194165	0.278814	0.239644	0.164221	0.091295	0.720182	0.940761
197	X - 24295	1900	TRUE	-0.218467	0.0985611	0.0180869	0.497176	0.213348	-0.00921881	0.015152	-0.713162	-5.31108	0.121514	0.169254	0.732806	1.73248e-27	0.00212789	8.82157e-06	1.07281e-05	0.669239	0.000213035	0.720182	0.976775
765	dihomo-linolenate (20:3n3 or n6)	1900	TRUE	-0.58937	0.100525	0.0278013	-0.246046	0.112935	0.00139308	0.0206661	0.562546	-1.15387	4.26827e-05	0.169596	0.607185	1.38928e-07	0.111163	0.510582	4.05554e-09	0.741306	0.430602	0.720182	0.971569
576	N-acetylphenylalanine	1900	TRUE	-1.80296	0.0943087	0.0784173	0.586379	-0.0268165	0.0146145	0.0301183	4.50978	1.84871	2.69582e-40	0.171391	0.123763	1.70693e-40	0.688052	2.36591e-13	9.12708e-20	0.00496742	0.180124	0.724371	0.74401
711	lysine	1900	TRUE	-1.03584	0.0993809	-0.0969953	0.320799	0.0939193	0.00755958	0.0199047	-4.5809	-5.22956	4.98386e-13	0.17253	0.0715674	5.26164e-12	0.183234	0.000334899	1.26101e-08	0.00692104	0.00033254	0.724903	0.709071
395	phenol sulfate	1900	TRUE	-0.551284	0.101311	-0.031384	0.188198	0.091895	0.00512903	0.00787888	-2.95779	-3.75436	0.000167533	0.173535	0.568291	7.47716e-05	0.202527	0.0172393	0.0274758	0.0879116	0.0116934	0.724903	0.960734
627	X - 21471	1900	TRUE	-0.06904	0.0933662	-0.0484596	0.0594024	0.992418	-0.0135648	0.0203935	-10.6367	1.76439	0.609389	0.173944	0.339542	0.175358	2.45713e-50	8.60948e-12	6.15964e-10	2.87536e-11	0.198971	0.724903	0.902068
124	thyroxine	1900	TRUE	-0.260417	0.098047	-0.00166702	-0.420855	0.0503691	-0.00385087	0.0210731	-2.1951	-3.4312	0.0670474	0.174862	0.975095	7.27854e-20	0.471806	0.065487	1.2452e-09	0.192025	0.0176142	0.725354	0.995254
55	quinolinate	1900	TRUE	-2.16101	0.0923556	0.0409446	0.108337	0.0634927	0.0112676	0.054912	8.0555	-0.632142	4.81924e-58	0.176821	0.417728	0.0130645	0.337782	1.22885e-08	8.23297e-63	4.19996e-07	0.643974	0.730101	0.931055
326	X - 18913	1900	TRUE	0.13195	0.0974789	0.0215108	0.427595	-0.16858	-0.00404282	-0.00331349	-3.57958	-3.10058	0.355881	0.179573	0.688556	2.89629e-20	0.0165717	0.0543593	0.341967	0.034285	0.0328362	0.738061	0.971569
598	androstenediol (3beta,17beta) disulfate (2)	1900	TRUE	0.767161	0.0840541	0.00071241	0.792447	-0.0469405	-0.0304949	0.0141862	-3.02478	-5.63404	5.32507e-10	0.180683	0.987749	5.22834e-87	0.440252	3.015e-63	2.52241e-06	0.0385427	7.26651e-06	0.739231	0.995254
728	sphingomyelin (d18:2/24:2)*	1900	TRUE	-0.505314	-0.0918523	0.0450238	-0.543303	-0.597093	0.000306078	0.0279233	-4.69741	1.29685	0.000194313	0.182596	0.3766	4.84837e-35	3.74229e-19	0.877991	3.17117e-17	0.00341684	0.346841	0.740483	0.919286
443	N-palmitoylglycine	1900	TRUE	-0.100615	0.0984938	0.0044924	-0.327061	-0.0581087	0.00411564	0.000563502	4.83734	2.28693	0.489028	0.182641	0.934436	4.12868e-12	0.416977	0.0542482	0.873809	0.00493658	0.121883	0.740483	0.987601
441	hypotaurine	1900	TRUE	0.604277	0.098628	0.0248955	0.0563643	-0.038981	-0.00278535	-0.0178367	4.71081	0.297013	3.74075e-05	0.18546	0.651018	0.235826	0.58901	0.196156	6.09263e-07	0.00660009	0.841992	0.748524	0.971569
632	X - 23974	1900	TRUE	0.483344	-0.0971229	0.0051593	0.0284709	-0.10369	0.00563983	-0.0262506	-3.88938	1.6614	0.000837428	0.186618	0.924357	0.544184	0.145512	0.00802979	1.04196e-13	0.0231177	0.258733	0.74982	0.987601
358	androsterone glucuronide	1900	TRUE	0.886723	0.0805903	-0.0275676	0.963584	-0.0111462	-0.0277076	0.00256702	8.75173	-0.0950825	1.81143e-13	0.187975	0.542179	2.76592e-134	0.850887	3.51441e-55	0.382347	8.2094e-10	0.938102	0.751898	0.956284
859	3-methylglutarylcarnitine (2)	1900	TRUE	-0.791928	0.0903398	-0.0332802	-0.244808	0.535647	0.0133913	0.00565792	14.9523	-3.29676	5.91874e-09	0.19149	0.514899	2.93704e-08	1.29286e-15	2.19186e-11	0.0883686	1.61226e-20	0.0171745	0.760649	0.949816
744	1-arachidoyl-2-arachidonoyl-GPC (20:0/20:4)*	1900	TRUE	0.530017	0.0954407	-0.013892	-0.0232094	-0.149538	0.00710493	-0.0302442	2.63683	3.62541	0.000237801	0.192858	0.79755	0.619831	0.0351812	0.000805946	8.27812e-18	0.122303	0.0134049	0.760649	0.976775
153	1-(1-enyl-palmitoyl)-GPE (P-16:0)*	1900	TRUE	0.401965	0.0956674	-0.0201396	0.228572	-0.107114	-0.00577764	-0.00713552	-6.67964	2.06523	0.00547907	0.193359	0.710946	1.12414e-06	0.132722	0.00662218	0.0432902	9.59517e-05	0.160396	0.760649	0.976775
895	gamma-glutamylglutamate	1900	TRUE	-1.97337	0.0901516	-0.0438207	0.450174	0.161785	0.00980132	0.046826	-3.20727	-2.80453	2.07355e-47	0.193558	0.392391	2.67748e-24	0.01601	1.02962e-06	6.05597e-45	0.0469666	0.0431792	0.760649	0.919286
61	sphinganine	1900	TRUE	-0.177922	0.0965099	0.0494636	0.0779423	-0.0330666	-0.000547234	0.00575517	-3.18872	0.529129	0.224751	0.195066	0.368771	0.101134	0.646727	0.799526	0.107494	0.0659507	0.722479	0.763228	0.916162
448	1-palmitoleoyl-GPC (16:1)*	1900	TRUE	0.00294071	0.0942147	0.08098	0.0839637	-0.0247326	0.00505412	-0.0110114	11.3391	-5.46662	0.98369	0.197484	0.13383	0.0719707	0.726893	0.016862	0.00170338	2.70464e-11	0.000185279	0.768559	0.76377
808	gamma-glutamylthreonine	1900	TRUE	-0.440375	0.0952301	0.000679063	0.220801	0.0102974	0.00535493	0.00302026	6.74244	2.815	0.00249245	0.198144	0.990091	2.94929e-06	0.885775	0.0123756	0.395232	9.1066e-05	0.0572131	0.768559	0.995254
134	X - 23587	1900	TRUE	-0.495701	-0.0934762	-0.0719743	0.254108	0.0761655	0.0120602	-0.00592043	-6.11586	2.79895	0.000570993	0.201142	0.182832	5.21117e-08	0.28225	1.19269e-08	0.0916967	0.000327962	0.055683	0.774917	0.798683
425	1-stearoyl-2-oleoyl-GPS (18:0/18:1)	1900	TRUE	0.415631	0.0930812	-0.0173008	-0.113813	-0.0336542	-0.0158322	0.0140379	-1.70896	-0.650222	0.00380149	0.202174	0.748345	0.0145637	0.634043	6.46248e-14	6.15831e-05	0.314553	0.656036	0.774917	0.976775
826	myristoleoylcarnitine (C14:1)*	1900	TRUE	-0.312722	0.0939074	0.0760584	0.120565	-0.0577375	0.013326	-0.0137179	-2.46239	-0.814735	0.0309698	0.202378	0.162301	0.0103458	0.418426	4.02533e-10	0.000104821	0.151087	0.580318	0.774917	0.781914
363	theobromine	1900	TRUE	-0.3528	-0.0941759	0.0289923	-0.116355	-0.114573	0.00459941	0.0068496	7.27885	-5.34981	0.0156577	0.204285	0.596874	0.0140074	0.110858	0.0321135	0.0544461	2.50851e-05	0.000312081	0.777745	0.971569
499	1-adrenoyl-GPC (22:4)*	1900	TRUE	0.0752973	0.0928437	0.0344095	0.190409	-0.138008	-0.00983738	0.0113635	8.23316	4.98764	0.601493	0.205115	0.525058	4.67902e-05	0.0518416	3.47113e-06	0.00123543	1.39253e-06	0.000666529	0.777745	0.949816
631	aconitate [cis or trans]	1900	TRUE	-1.58864	0.0898626	0.12175	-0.09338	0.153185	0.0222864	0.0176417	-0.432602	-1.17193	5.96969e-30	0.205721	0.020324	0.0393964	0.0259534	2.04214e-27	2.28053e-07	0.793597	0.409364	0.777745	0.545072
816	ceramide (d18:1/20:0, d16:1/22:0, d20:1/18:0)*	1900	TRUE	-1.48127	0.091317	0.0405478	0.0816321	0.0101909	0.0144737	0.0263198	-0.75949	-2.75612	4.70719e-25	0.209792	0.451047	0.0790248	0.885114	6.37444e-12	5.08372e-14	0.654152	0.0584479	0.787769	0.934338
14	1-palmitoyl-2-docosahexaenoyl-GPE (16:0/22:6)*	1900	TRUE	0.00857318	0.0905894	0.0629947	-0.333416	0.392578	0.0105421	-0.0165839	-5.82385	-0.903848	0.951938	0.21013	0.238228	4.9763e-13	2.06323e-08	4.62977e-07	1.76171e-06	0.000539477	0.531911	0.787769	0.843686
801	arachidonate (20:4n6)	1900	TRUE	0.0379628	0.0930139	0.00457117	-0.0314426	0.240751	0.000751289	-0.00392669	2.08562	4.87413	0.795588	0.211675	0.933794	0.508335	0.000845789	0.72731	0.272057	0.229042	0.00106815	0.790254	0.987601
109	behenoylcarnitine (C22)*	1900	TRUE	-0.378417	0.0916529	0.0161813	0.210857	-0.160232	0.0120409	-0.00960537	-3.56452	-2.74814	0.00923705	0.21475	0.766901	7.77297e-06	0.0251515	1.76362e-08	0.0067616	0.0382369	0.0629357	0.798059	0.976775
672	N-acetylalliin	1900	TRUE	0.0308533	-0.0923122	-0.00950304	0.17492	-0.0868649	0.00377917	-0.00925454	2.02616	2.91577	0.83364	0.216256	0.863217	0.000241863	0.229664	0.080148	0.00981391	0.243733	0.0508702	0.798059	0.978217
371	5alpha-androstan-3beta,17beta-diol monosulfate (2)	1900	TRUE	0.408445	0.0812694	-0.0584614	0.870824	0.223667	-0.0159006	0.000143717	-1.2271	-5.95222	0.00161336	0.21696	0.22936	2.03075e-95	0.000451643	6.83699e-17	0.963724	0.423315	6.16557e-06	0.798059	0.841623
740	X - 15486	1900	TRUE	-1.62618	-0.0884815	0.0185017	0.182849	0.00227673	0.0107004	0.0373277	-3.46145	-2.17952	1.85462e-30	0.219414	0.728183	7.01258e-05	0.973976	2.8421e-07	3.74449e-27	0.0390678	0.130455	0.798059	0.976775
798	beta-citrylglutamate	1900	TRUE	-0.302137	0.0916924	-0.0123894	-0.021583	0.11799	0.00125197	0.00827564	0.803041	-1.88748	0.0401997	0.220506	0.82272	0.651416	0.103614	0.5631	0.0212551	0.644899	0.207374	0.798059	0.976775
432	N-acetylisoleucine	1900	TRUE	-1.58649	0.0852055	0.0125023	0.583636	0.193658	0.00900085	0.0319301	1.10497	-1.18676	4.75784e-31	0.220734	0.807866	1.92111e-39	0.00406194	7.76879e-06	1.18643e-21	0.495191	0.393839	0.798059	0.976775
688	creatine	1900	TRUE	-0.612919	0.0827128	-0.0911797	-0.770837	0.10382	0.00600623	0.0219707	-4.82279	-2.53213	4.02347e-06	0.220884	0.067792	1.91368e-71	0.112672	0.00212118	1.25585e-11	0.00217133	0.0609946	0.798059	0.709071
694	lactosyl-N-nervonoyl-sphingosine (d18:1/24:1)*	1900	TRUE	1.15635	-0.0838588	0.0747414	-0.0907691	-0.640557	0.00328185	-0.0428271	12.2789	0.998071	9.59775e-18	0.220891	0.139774	0.0379104	4.75884e-22	0.0977246	9.05014e-39	1.37539e-14	0.466385	0.798059	0.775969
850	dodecenedioate (C12:1-DC)*	1900	TRUE	-0.336697	0.0901305	0.0974877	-0.104691	-0.00789748	0.0123623	-0.00872894	0.454149	-0.324102	0.0214684	0.22578	0.0761993	0.0275094	0.912749	9.31047e-09	0.0145378	0.793209	0.827621	0.801701	0.709714
871	1-(1-enyl-palmitoyl)-2-docosahexaenoyl-GPC (P-16:0/22:6)*	1900	TRUE	0.501146	0.0854993	-0.0487789	0.0752165	-0.126469	0.014676	-0.0431408	-5.68007	3.73387	0.000323803	0.227424	0.351348	0.0962089	0.065304	7.97802e-13	7.0186e-37	0.000573072	0.00840878	0.801701	0.907226
645	3-hydroxybutyrate (BHBA)	1900	TRUE	0.218544	0.0901292	0.0450156	-0.122855	-0.0967752	0.00330375	-0.0118042	-1.82255	-1.15913	0.137667	0.228319	0.415459	0.0100948	0.181751	0.126911	0.00101391	0.295424	0.438607	0.801701	0.930021
427	N-acetylmethionine	1900	TRUE	-0.773211	-0.0873367	0.0521315	-0.263197	-0.292378	0.00728367	0.0197794	7.15489	4.18933	5.95186e-08	0.22832	0.330453	1.28892e-08	3.13464e-05	0.000515076	1.32154e-08	2.24673e-05	0.00386625	0.801701	0.902068
763	2-aminobutyrate	1900	TRUE	-0.306181	0.0899032	-0.128373	0.120186	0.0237346	0.00259172	0.00565816	-2.41817	-1.59098	0.0373425	0.229006	0.020091	0.0117595	0.743026	0.230658	0.114788	0.164627	0.28723	0.801701	0.545072
278	androstenediol (3alpha, 17alpha) monosulfate (3)	1900	TRUE	0.873214	0.0741497	-0.0575569	0.9016	-0.0245581	-0.0262063	0.00213661	-8.61773	-6.21834	6.29878e-13	0.229357	0.206676	4.98685e-116	0.681085	8.11972e-49	0.470609	1.97205e-09	4.67e-07	0.801701	0.798683
241	adrenate (22:4n6)	1900	TRUE	-0.679215	0.0878102	0.0233076	-0.240161	0.215414	0.00153262	0.0232664	0.838457	0.188872	2.38117e-06	0.230054	0.666355	2.71018e-07	0.00236886	0.469005	3.48617e-11	0.622563	0.897311	0.801701	0.971569
451	X - 12812	1900	TRUE	-0.0589984	-0.0886604	0.0170682	-0.212581	0.161022	0.00342067	-0.00153671	0.367242	3.16574	0.685486	0.231094	0.755031	6.84996e-06	0.0247483	0.110253	0.665471	0.831289	0.0325436	0.801701	0.976775
464	1,2-dilinoleoyl-GPC (18:2/18:2)	1900	TRUE	1.11801	-0.0824776	0.0699814	-0.0549123	-0.708972	0.00414607	-0.0430627	1.14921	-3.21707	1.89411e-16	0.232292	0.170171	0.212813	2.9854e-26	0.0379394	1.37466e-38	0.474715	0.0198493	0.801701	0.781914
433	androstenediol (3alpha, 17alpha) monosulfate (2)	1900	TRUE	1.25115	0.0759297	-0.0193844	0.671643	-0.090266	-0.0352101	0.00672874	4.48605	-1.75762	1.5509e-23	0.232496	0.679956	1.73011e-61	0.142837	1.22605e-81	0.0275238	0.00244777	0.167073	0.801701	0.971569
86	X - 24522	1900	TRUE	-1.16647	0.0854043	-0.0473954	0.193809	0.0515195	0.015446	0.0122154	10.0447	-1.33264	1.2476e-16	0.233002	0.370378	2.23457e-05	0.457639	8.92581e-14	0.000380233	1.6942e-09	0.352183	0.801701	0.916162
35	X - 12216	1900	TRUE	0.054385	0.0843046	-0.0494315	-0.0397855	0.00702135	0.0160873	-0.029238	13.6764	6.71996	0.695871	0.23313	0.344059	0.378034	0.918346	3.70287e-15	7.06253e-18	9.75259e-17	2.02068e-06	0.801701	0.902068
873	piperine	1900	TRUE	-0.285496	-0.0890004	-0.0653885	0.121852	0.0157231	-0.000105542	0.00958279	-2.56232	-1.1301	0.0523327	0.233946	0.236608	0.010681	0.828147	0.961087	0.00759442	0.141078	0.449915	0.801701	0.843686
580	uridine	1900	TRUE	-0.094357	-0.0864031	0.0158101	0.398862	-0.110167	0.00505333	-0.00956303	-7.79816	-3.15323	0.509317	0.234426	0.768408	8.03872e-18	0.117555	0.0162276	0.00611872	4.04318e-06	0.0300581	0.801701	0.976775
797	indolepropionate	1900	TRUE	1.33237	-0.0845809	0.105713	-0.010946	-0.149168	-0.000709221	-0.0459241	1.80499	-0.713396	2.17346e-21	0.235536	0.0448012	0.809945	0.030794	0.730987	4.84427e-41	0.276924	0.616949	0.802433	0.63384
652	myristoyl dihydrosphingomyelin (d18:0/14:0)*	1900	TRUE	-0.589539	-0.0852732	-0.0476562	-0.337658	-0.324461	0.00854091	0.0130102	9.89534	-2.29118	3.22281e-05	0.236736	0.370833	2.14049e-13	3.35765e-06	4.19812e-05	0.000169674	3.70067e-09	0.111997	0.803468	0.916162
792	myristoylcarnitine (C14)	1900	TRUE	-0.945282	0.0855512	-0.0193686	0.300587	0.0234416	0.0176762	-0.000703754	0.4595	-2.56468	3.85995e-11	0.239188	0.718366	9.25018e-11	0.739175	4.23957e-17	0.84016	0.785989	0.0777353	0.807443	0.976775
306	1-palmitoyl-2-linoleoyl-GPC (16:0/18:2)	1900	TRUE	0.0956718	-0.0846781	-0.0223809	-0.159515	-0.658054	0.00490554	-0.00580033	-2.14731	-8.04014	0.500733	0.240924	0.674868	0.000538641	5.05527e-21	0.0188622	0.0942751	0.201524	2.6005e-08	0.807443	0.971569
400	myristate (14:0)	1900	TRUE	-0.0843873	0.0835745	-0.0127891	-0.598257	0.0491781	0.00207602	0.00712477	2.95343	-1.75758	0.548362	0.242132	0.808592	2.62508e-39	0.477366	0.315227	0.0377885	0.0758422	0.2188	0.807443	0.976775
891	linoleate (18:2n6)	1900	TRUE	-0.372526	0.0847108	0.072751	-0.4455	0.000535034	0.0052292	0.00965426	-7.12553	-1.90196	0.00895248	0.242175	0.174021	5.63573e-22	0.993915	0.0125757	0.00549353	2.38524e-05	0.189258	0.807443	0.791485
589	propionylglycine	1900	TRUE	0.54189	0.0846388	0.0320222	-0.106059	-0.24576	0.00664046	-0.0288497	10.5678	2.71803	0.000142646	0.242413	0.549465	0.0217448	0.00045815	0.00152352	1.0404e-16	3.63872e-10	0.0605602	0.807443	0.956905
156	X - 12524	1900	TRUE	0.132223	-0.0867993	-0.0609285	-0.16486	-0.060213	0.0075863	-0.0144962	3.34807	-1.85959	0.366533	0.243448	0.26782	0.000519181	0.403536	0.000425386	4.95292e-05	0.0533118	0.211567	0.807887	0.87385
237	N-acetylglutamate	1900	TRUE	-1.38213	0.0826552	0.0141212	-0.342461	0.163337	0.0174811	0.0225693	-1.0103	1.25726	4.67028e-23	0.244579	0.787892	4.25732e-14	0.0176034	1.79083e-17	3.62788e-11	0.541281	0.376239	0.808646	0.976775
350	2-oxoarginine*	1900	TRUE	-0.815764	0.0830556	-0.0321541	0.477616	0.114237	-0.00355881	0.0279955	-0.825865	0.975133	7.304e-09	0.246572	0.54378	1.64983e-25	0.0999084	0.0861316	4.09307e-16	0.6207	0.49644	0.808842	0.956905
458	caprylate (8:0)	1900	TRUE	0.765163	0.0853498	-0.0478708	-0.335543	-0.0189573	-0.00203011	-0.0190278	-0.629393	1.66371	1.30421e-07	0.246657	0.379182	9.66449e-13	0.790512	0.340846	7.44531e-08	0.713672	0.258916	0.808842	0.919286
583	trimethylamine N-oxide	1900	TRUE	-1.17518	-0.0824033	0.00479723	0.168355	0.0407216	0.0206369	0.00393686	7.5061	2.11594	6.49937e-17	0.248955	0.927623	0.000224209	0.556423	1.86254e-23	0.251235	6.46825e-06	0.138884	0.808842	0.987601
120	X - 23314	1900	TRUE	0.111246	-0.0826368	0.0899055	0.151221	-0.031139	0.0150563	-0.0323092	4.2759	1.00202	0.430435	0.249137	0.089716	0.000953634	0.653927	3.93084e-13	6.23533e-21	0.0104319	0.484803	0.808842	0.709714
692	decanoylcarnitine (C10)	1900	TRUE	0.179464	0.0854632	0.032333	0.0411918	0.00785692	0.00583871	-0.017254	-5.59292	2.53087	0.218759	0.249152	0.555151	0.384211	0.912907	0.00650057	1.25704e-06	0.00119889	0.0879923	0.808842	0.959573
198	N-acetyltyrosine	1900	TRUE	-1.80895	0.0814245	0.0510901	0.258471	-0.0483835	0.0166083	0.0316926	4.00552	2.71341	1.90778e-38	0.250803	0.329459	1.12319e-08	0.481138	5.64502e-16	1.26531e-20	0.0152499	0.0557244	0.811262	0.902068
180	X - 15461	1900	TRUE	-1.71714	0.0807108	0.0530224	0.0931983	0.195493	0.0181815	0.027261	-6.13994	-0.771133	1.67394e-34	0.257211	0.313765	0.0404026	0.00460986	1.12219e-18	1.56581e-15	0.000213957	0.588391	0.82299	0.880426
700	glycosyl-N-stearoyl-sphingosine (d18:1/18:0)	1900	TRUE	-0.1396	-0.0823755	-0.0355795	-0.338193	-0.381051	0.0113519	-0.00729583	-0.551192	-2.73403	0.32936	0.257405	0.507951	3.23456e-13	6.35828e-08	6.85977e-08	0.0366651	0.744818	0.060222	0.82299	0.949816
852	1-margaroyl-GPE (17:0)*	1900	TRUE	0.551795	0.0826644	0.103578	0.0256488	0.12214	0.00461158	-0.0297656	3.58435	-1.44724	0.000127884	0.25883	0.0555176	0.583098	0.0850042	0.029452	2.46543e-17	0.0354777	0.323013	0.82299	0.66325
514	1-stearoyl-2-docosapentaenoyl-GPC (18:0/22:5n3)*	1900	TRUE	-1.01302	-0.0818989	0.0915979	0.187725	-0.0123002	0.0196866	-0.000668374	3.75503	0.908971	1.29544e-12	0.259044	0.0875625	5.0588e-05	0.861085	6.73618e-21	0.847845	0.0262435	0.531163	0.82299	0.709714
366	cortisol	1900	TRUE	0.749715	-0.0811798	-0.0537996	-0.17618	0.00193964	0.00608026	-0.0343566	9.35633	0.898432	1.21773e-07	0.259621	0.311977	0.000126743	0.977817	0.00351747	2.84361e-23	2.40131e-08	0.532826	0.82299	0.880426
346	1-pentadecanoyl-2-arachidonoyl-GPC (15:0/20:4)*	1900	TRUE	-0.481176	0.0810197	-0.112444	-0.187835	0.268268	-0.00415394	0.0260448	11.7202	4.09991	0.000673508	0.25994	0.0343465	4.28414e-05	0.000117735	0.0458836	4.57146e-14	2.57276e-12	0.00437318	0.82299	0.63384
398	hexadecanedioate (C16-DC)	1900	TRUE	0.136482	0.0835776	0.00821712	-0.0493917	0.00619466	0.00353927	-0.0108906	7.29319	-1.27524	0.352013	0.262095	0.881379	0.299148	0.931618	0.100685	0.00233436	2.63255e-05	0.392311	0.826236	0.983351
658	X - 22771	1900	TRUE	-0.292783	0.0814531	-0.0120113	0.39042	0.154463	0.0101864	-0.0132651	3.02231	-2.59784	0.0408011	0.262809	0.823164	4.1539e-17	0.0283661	1.29515e-06	0.00014544	0.0743363	0.074194	0.826236	0.976775
71	carnitine	1900	TRUE	-1.1571	0.0790615	0.00618396	0.580143	0.0651963	0.0113622	0.0134621	-7.56258	-2.95065	1.21593e-16	0.26552	0.906174	1.64688e-37	0.343191	3.18268e-08	7.83895e-05	4.77576e-06	0.037764	0.829877	0.985319
171	4-methyl-2-oxopentanoate	1900	TRUE	0.105762	0.0747641	-0.0681541	0.842875	0.151985	-0.0133446	0.00719341	0.271114	-3.29846	0.423902	0.265997	0.169966	6.30493e-86	0.0195765	6.75873e-12	0.0257904	0.86246	0.0141544	0.829877	0.781914
240	X - 21796	1900	TRUE	-0.140586	0.0758284	0.065381	0.752698	-0.0559096	0.00961154	-0.0220746	0.294702	-2.2394	0.297565	0.268919	0.197018	3.03928e-66	0.400058	1.27363e-06	2.0257e-11	0.853588	0.102629	0.829877	0.798683
155	sphingomyelin (d18:2/21:0, d16:2/23:0)*	1900	TRUE	-1.65987	-0.0717742	-0.0285536	-0.697691	-0.352469	0.0214825	0.0341213	1.87586	2.08575	1.62233e-38	0.269476	0.552143	1.85202e-63	2.16459e-08	3.15294e-30	7.80201e-28	0.215134	0.10866	0.829877	0.956905
606	deoxycholic acid glucuronide	1900	TRUE	-0.904255	0.080172	0.0545278	0.254318	-0.0858351	0.00649516	0.0168549	11.0111	2.71705	2.65101e-10	0.270368	0.31031	4.31369e-08	0.223128	0.00202457	1.38636e-06	7.93339e-11	0.0618423	0.829877	0.880426
98	N-formylmethionine	1900	TRUE	-1.21465	-0.0800762	0.0573432	0.137037	-0.0518435	0.0188855	0.00892731	4.47824	1.18836	2.01363e-17	0.270579	0.285627	0.00313962	0.461507	2.67098e-19	0.0105105	0.00813717	0.413714	0.829877	0.880426
889	homoarginine	1900	TRUE	-0.316272	0.0742427	-0.0629864	0.402589	0.00365363	-0.012832	0.0287738	-23.0813	-3.53426	0.0171839	0.271069	0.206336	8.78329e-21	0.955409	4.85335e-11	6.36708e-19	6.83224e-49	0.00881198	0.829877	0.798683
511	phosphatidylcholine (14:0/14:0, 16:0/12:0)	1900	TRUE	0.0478503	-0.0812828	-0.0703168	-0.203789	-0.164777	-0.00109954	0.00421491	7.78003	-2.70565	0.742109	0.271377	0.19783	1.5595e-05	0.0213428	0.607045	0.234802	6.1356e-06	0.0672013	0.829877	0.798683
579	1-palmitoyl-2-stearoyl-GPC (16:0/18:0)	1900	TRUE	0.43757	-0.0788164	0.0866179	0.275304	-0.396599	0.00866524	-0.0328277	4.61361	-0.0671347	0.00196352	0.272552	0.102695	1.92441e-09	1.20026e-08	3.0508e-05	1.73988e-21	0.00580649	0.962735	0.829999	0.72554
261	N-acetyltryptophan	1900	TRUE	-1.2179	0.07612	0.0365635	0.725677	0.029468	0.00795689	0.0191191	-0.123406	-6.72983	5.18792e-19	0.27327	0.476335	3.55514e-60	0.6615	7.54259e-05	9.9225e-09	0.939192	1.28391e-06	0.829999	0.944808
680	N-acetylglucosamine/N-acetylgalactosamine	1900	TRUE	-1.55622	0.0769074	0.069773	-0.031311	0.210216	0.0049534	0.0454391	-1.63067	-0.0577447	4.32241e-29	0.276322	0.181338	0.487474	0.00212724	0.0153681	6.20896e-41	0.321504	0.967406	0.834502	0.798683
784	laurylcarnitine (C12)	1900	TRUE	-0.0938131	0.0802284	0.0306474	0.237396	-0.0520315	0.00895163	-0.0152322	-2.88228	1.20698	0.517939	0.276615	0.573797	4.575e-07	0.46636	2.71711e-05	1.68667e-05	0.0932037	0.413214	0.834502	0.961962
466	metabolonic lactone sulfate	1900	TRUE	-2.26904	0.0690958	-0.0456971	0.336619	-0.0255462	0.000767136	0.0751559	4.35164	-8.3172	3.43737e-72	0.281627	0.335197	2.08059e-16	0.681111	0.679467	1.93898e-131	0.00358688	9.23044e-11	0.84323	0.902068
864	cystine	1900	TRUE	-1.7596	-0.0773138	-0.0206166	0.194993	0.0647325	0.0178397	0.0296698	0.223948	-0.758016	1.34445e-35	0.281629	0.697599	2.09908e-05	0.352047	8.89821e-18	7.51124e-18	0.893444	0.597692	0.84323	0.971569
675	orotidine	1900	TRUE	-1.81785	0.073021	0.0263501	0.571933	0.0902353	0.0129885	0.0338202	2.62823	-2.55561	4.23893e-42	0.282545	0.599708	1.05605e-39	0.1704	3.91829e-11	3.47378e-25	0.0966643	0.060081	0.84323	0.971569
696	homostachydrine*	1900	TRUE	-0.150037	-0.0804064	-0.103577	0.0468246	0.109531	0.00300498	0.000373098	-3.11699	-0.171833	0.308903	0.283273	0.0613933	0.327623	0.131314	0.165714	0.917397	0.0740161	0.908735	0.84323	0.680403
0	linoleoyl ethanolamide	1900	TRUE	-0.846951	0.0786855	0.115224	-0.158871	-0.163721	0.00887331	0.016737	-3.97236	1.05146	5.30478e-09	0.285922	0.0344426	0.000737177	0.0218951	3.18854e-05	2.26511e-06	0.0206782	0.475925	0.845756	0.63384
47	1-(1-enyl-oleoyl)-GPC (P-18:1)*	1900	TRUE	0.843871	0.0762654	0.0449908	0.143558	-0.359743	0.00564645	-0.0406694	-0.502074	2.00875	2.10178e-09	0.286798	0.395088	0.00168316	2.13747e-07	0.006412	2.66194e-32	0.763279	0.160748	0.845756	0.919286
266	X - 11444	1900	TRUE	-1.54658	0.0716262	-0.102153	0.802478	0.0279544	0.0100398	0.0275034	3.5914	-3.01918	1.84116e-31	0.287615	0.0401208	9.70619e-78	0.66833	2.57623e-07	1.80765e-17	0.0220201	0.0250391	0.845756	0.63384
685	docosapentaenoate (n3 DPA; 22:5n3)	1900	TRUE	-0.598007	0.0778981	0.0405114	-0.245485	0.16974	0.014325	-0.00128904	-2.49955	-0.399485	3.38054e-05	0.287897	0.45446	1.54805e-07	0.0168188	1.42551e-11	0.714119	0.143022	0.785267	0.845756	0.935664
17	carboxyethyl-GABA	1900	TRUE	-0.614081	0.0767224	0.0408114	0.144704	-0.0247579	0.0177798	-0.0111266	2.38639	-2.59757	1.73446e-05	0.290839	0.446996	0.0018021	0.724924	2.64633e-17	0.00141788	0.158209	0.0738015	0.847897	0.934338
191	octadecenedioate (C18:1-DC)*	1900	TRUE	0.774976	0.07712	-0.0321329	0.092842	-0.0833518	0.00145884	-0.031293	4.21818	-0.417076	7.07762e-08	0.291304	0.551799	0.0465664	0.239019	0.490192	4.6786e-19	0.0131736	0.775408	0.847897	0.956905
565	1-palmitoyl-2-linoleoyl-GPE (16:0/18:2)	1900	TRUE	-0.410382	0.0772395	0.120364	-0.266299	-0.0447694	0.00216271	0.0133581	-4.6184	-7.34709	0.00450411	0.292808	0.0265116	1.33152e-08	0.529039	0.308604	0.000150768	0.00690038	5.65936e-07	0.847897	0.58779
24	X - 18886	1900	TRUE	-0.528831	0.0772874	-0.0291639	0.362234	0.077778	-0.00252652	0.0178675	0.827012	-0.972532	0.00025521	0.292957	0.591219	1.14741e-14	0.274581	0.234705	4.0957e-07	0.628864	0.508251	0.847897	0.971569
122	X - 21834	1900	TRUE	0.350969	-0.0783954	-0.0074987	0.134168	-0.0499979	0.0011549	-0.0157435	3.91204	3.17131	0.016872	0.293611	0.891855	0.00486507	0.489267	0.592791	1.1159e-05	0.0243899	0.0336772	0.847897	0.983351
417	21-hydroxypregnenolone disulfate	1900	TRUE	1.2601	0.0700849	-0.0116384	0.478232	-0.200991	-0.0305925	0.00189037	0.143287	-1.69011	9.46118e-22	0.294303	0.813669	3.60702e-29	0.0019036	2.14398e-56	0.555702	0.926627	0.206115	0.847897	0.976775
706	5-dodecenoylcarnitine (C12:1)	1900	TRUE	-0.395599	0.0772666	0.0351668	-0.280654	-0.0166864	0.00219999	0.0137524	-0.498794	-0.687817	0.00653299	0.2959	0.519668	2.71486e-09	0.815732	0.303605	0.000106443	0.771958	0.641811	0.849764	0.949816
754	1-dihomo-linolenoyl-GPC (20:3n3 or 6)*	1900	TRUE	-0.404676	0.0764227	0.0273218	0.228967	-0.163421	0.00184664	0.00814966	12.3547	-1.34222	0.00512084	0.298233	0.614744	1.04758e-06	0.0216545	0.384938	0.0208476	5.09355e-13	0.361062	0.853728	0.971569
21	isobutyrylcarnitine (C4)	1900	TRUE	-0.0630956	0.0737559	-0.00423921	0.423722	0.164219	0.011154	-0.023606	-0.59061	-0.680125	0.652782	0.300741	0.935841	1.23489e-20	0.0173762	6.32076e-08	5.2262e-12	0.721907	0.633322	0.856149	0.987601
210	2,3-dihydroxyisovalerate	1900	TRUE	-0.380715	-0.0744799	0.126737	0.210309	0.0827801	0.015789	-0.0178405	6.51685	1.37328	0.00728222	0.301575	0.0173553	4.87982e-06	0.235885	3.73551e-14	2.54141e-07	0.000103478	0.340972	0.856149	0.545072
623	tetradecadienedioate (C14:2-DC)*	1900	TRUE	-0.537225	0.0759632	0.062587	-0.214516	-0.0918101	0.00480276	0.013361	6.57217	-2.20312	0.000207181	0.301947	0.249711	4.95243e-06	0.197753	0.0240746	0.000155516	0.000125129	0.134475	0.856149	0.860453
313	salicylate	1900	TRUE	-0.0303155	-0.0755237	-0.00606553	0.0532394	0.476652	0.00715318	-0.0137483	1.09952	2.60913	0.833541	0.302901	0.910839	0.255225	1.91355e-11	0.000743911	9.35874e-05	0.519448	0.0751897	0.856149	0.98551
534	glycine conjugate of C10H14O2 (1)*	1900	TRUE	-1.29546	-0.0740041	0.0858178	0.322131	0.159331	0.00736828	0.0277916	1.63735	-1.39767	6.27642e-20	0.304261	0.106888	2.45734e-12	0.0224054	0.000406744	9.2314e-16	0.328938	0.332054	0.857288	0.72554
344	androstenediol (3beta,17beta) disulfate (1)	1900	TRUE	0.128399	0.0682376	0.0105785	0.718215	-0.0448677	-0.0193769	0.0189015	-5.53567	-5.96511	0.328705	0.307067	0.830316	1.2063e-63	0.488109	1.17892e-23	3.78208e-09	0.000372544	8.05704e-06	0.861308	0.976775
449	1-carboxyethylleucine	1900	TRUE	-1.95641	0.0672001	-0.0286445	0.6566	0.344034	0.00715121	0.0468545	-3.58959	-3.29357	2.68562e-51	0.308524	0.556895	8.84177e-55	7.36503e-08	0.000179832	1.69725e-49	0.0194767	0.0125926	0.861308	0.959573
436	X - 24544	1900	TRUE	1.2987	0.0648115	-0.0281097	0.702189	-0.127516	-0.030515	-0.00270488	-4.43557	-4.88463	4.19184e-25	0.309468	0.550792	1.10891e-66	0.0389865	1.87591e-61	0.376932	0.00281324	0.0001285	0.861308	0.956905
372	4-vinylphenol sulfate	1900	TRUE	-0.0271541	0.07472	0.0408709	0.301299	0.0268551	0.00408737	-0.0111586	6.638	0.977737	0.851325	0.310183	0.452491	1.44656e-10	0.706512	0.0549972	0.00159401	0.000107844	0.506772	0.861308	0.934338
710	1-palmitoyl-2-oleoyl-GPE (16:0/18:1)	1900	TRUE	-0.758475	0.0730571	0.0871396	-0.158416	0.367536	-0.00027749	0.0267456	0.277583	-3.08639	9.67604e-08	0.312152	0.102772	0.000596009	1.52734e-07	0.894433	1.28146e-14	0.868992	0.032792	0.861308	0.72554
878	caprate (10:0)	1900	TRUE	1.13979	0.0714183	-0.0690439	-0.559763	-0.0506474	-0.000935389	-0.0309576	3.76188	2.03065	3.15444e-16	0.313943	0.187663	4.06489e-35	0.460988	0.648475	9.67943e-20	0.0227182	0.152326	0.861308	0.798683
221	X - 21364	1900	TRUE	0.0493848	0.067735	0.0157963	0.646999	-0.0214345	-0.0210091	0.0251729	-4.28698	-3.17098	0.70947	0.314653	0.750972	3.63653e-51	0.742546	4.2695e-27	7.02046e-15	0.00627033	0.0186099	0.861308	0.976775
235	3-carboxy-4-methyl-5-propyl-2-furanpropanoate (CMPF)	1900	TRUE	-0.398534	-0.0707287	-0.0343803	0.238742	0.0972389	0.0233358	-0.0288302	-3.80698	-1.70166	0.00415411	0.316866	0.510237	1.20383e-07	0.155433	3.52094e-30	1.91666e-17	0.0206724	0.22864	0.861308	0.949816
298	threonate	1900	TRUE	0.623939	0.0699177	0.0780226	0.14234	-0.060244	0.0136254	-0.0482011	2.80267	-1.54649	5.85481e-06	0.317697	0.131282	0.00143854	0.374106	1.6881e-11	1.07841e-46	0.08538	0.26921	0.861308	0.76377
625	2-hydroxyhippurate (salicylurate)	1900	TRUE	-0.524231	-0.0724578	0.0294587	0.0884196	0.461967	0.0128299	-0.00659479	3.24808	1.18723	0.000239008	0.317719	0.582476	0.0561191	4.81994e-11	9.63571e-10	0.0581828	0.054392	0.413107	0.861308	0.968271
531	N-acetylglycine	1900	TRUE	1.03484	0.0685855	0.0790712	-0.330729	-0.240662	0.010458	-0.0502314	10.0172	2.30378	1.90966e-14	0.31803	0.119238	4.58547e-14	0.000297936	1.4187e-07	2.11754e-52	3.75847e-10	0.093593	0.861308	0.74401
378	taurocholenate sulfate*	1900	TRUE	0.447166	0.0743313	-0.026335	0.0498753	0.127834	-0.00879012	-0.00239812	4.20488	5.06867	0.00228771	0.318452	0.632391	0.294316	0.0765194	4.54266e-05	0.502559	0.0153532	0.000671515	0.861308	0.971569
72	isovalerylcarnitine (C5)	1900	TRUE	-1.12432	0.0683776	-0.0386621	0.679551	0.260148	-0.000440423	0.0306279	-4.20002	-0.177922	8.32496e-17	0.319041	0.445761	2.799e-54	9.09096e-05	0.824434	1.44111e-20	0.00857002	0.896868	0.861308	0.934338
60	stearoyl sphingomyelin (d18:1/18:0)	1900	TRUE	-1.23995	-0.072106	-0.0214699	-0.0899981	-0.191031	0.0061991	0.0364755	-4.24132	2.92029	3.39451e-18	0.319628	0.688383	0.051654	0.0064896	0.00310143	9.90443e-26	0.0119277	0.0439035	0.861308	0.971569
248	1-arachidonoyl-GPI (20:4)*	1900	TRUE	-0.930631	0.0734922	0.00567011	0.102884	0.0548019	0.0128876	0.00905058	-3.24951	-0.547628	1.57086e-10	0.320106	0.917316	0.029219	0.444049	1.67489e-09	0.0107561	0.0590088	0.711105	0.861308	0.98551
701	glutamate	1900	TRUE	-2.16325	0.0626728	0.0137682	0.691346	0.320113	0.00427413	0.0587845	-8.46214	-2.98577	3.01852e-67	0.323306	0.769022	2.54316e-65	1.90872e-07	0.0198973	5.60833e-83	1.01771e-08	0.0186559	0.861567	0.976775
175	N-acetyl-isoputreanine	1900	TRUE	0.0360037	-0.0710432	0.10705	-0.0521765	-0.0205538	0.0152243	-0.0271989	5.47949	-3.03823	0.799446	0.323908	0.0442511	0.256378	0.768277	2.73105e-13	3.63154e-15	0.00108373	0.0349432	0.861567	0.63384
659	3,5-dichloro-2,6-dihydroxybenzoic acid	1900	TRUE	-1.00365	0.068726	-0.0201905	0.17664	0.255937	-0.00813405	0.0463057	1.4195	-2.96042	2.6693e-13	0.324637	0.695334	7.30837e-05	0.000152639	5.5881e-05	1.81983e-43	0.382238	0.0339142	0.861567	0.971569
128	X - 23641	1900	TRUE	-0.558593	-0.0700763	0.0153213	0.572942	0.267459	-0.00276973	0.0156555	1.487	-1.31702	7.01297e-05	0.326374	0.771503	3.05175e-36	0.000110156	0.179971	4.9393e-06	0.371066	0.356465	0.861567	0.976775
382	X - 15503	1900	TRUE	-2.46558	0.065866	0.0187812	0.322842	0.0953076	0.026399	0.0372538	5.50972	-3.046	1.87233e-77	0.327461	0.705507	5.50473e-14	0.143522	6.33752e-42	8.5592e-31	0.000434471	0.0235788	0.861567	0.975516
361	sphingomyelin (d18:1/20:1, d18:2/20:0)*	1900	TRUE	-0.929284	-0.0688806	0.0273036	-0.476775	-0.350741	0.0122899	0.0204846	-3.46311	5.34669	2.07148e-11	0.328406	0.600066	3.04754e-26	2.78276e-07	1.66472e-09	1.40895e-09	0.0348199	0.000149104	0.861567	0.971569
412	X - 24849	1900	TRUE	0.428735	0.0691013	0.0364857	0.544197	-0.0456259	0.00237578	-0.0269972	-2.52763	-1.98864	0.00205925	0.328423	0.484947	1.77043e-33	0.505307	0.245467	1.81179e-15	0.124689	0.15971	0.861567	0.949816
833	1-methyl-4-imidazoleacetate	1900	TRUE	-1.69075	-0.0676601	0.0739019	0.200927	0.00997558	0.0274563	0.0099618	8.35415	-1.52172	2.58199e-35	0.328822	0.148884	5.54765e-06	0.881847	1.05863e-42	0.00274567	2.23712e-07	0.272237	0.861567	0.781914
843	oleoylcholine	1900	TRUE	0.166083	-0.0703691	0.0634257	-0.0372133	-0.216184	0.0141036	-0.0289412	5.69087	-1.21565	0.241531	0.328857	0.233622	0.418552	0.00195657	1.33841e-11	6.00334e-17	0.000695028	0.39908	0.861567	0.841623
59	1-margaroyl-GPC (17:0)	1900	TRUE	0.77985	0.0674132	0.0686073	0.333816	-0.136422	0.00907916	-0.0480263	4.16322	-0.661041	1.14655e-08	0.331638	0.181168	5.02798e-14	0.0425411	6.19959e-06	4.66848e-47	0.0100223	0.634138	0.865553	0.798683
842	hydroxy-CMPF*	1900	TRUE	0.256371	-0.0673718	-0.0101671	0.14773	-0.0500033	0.0205587	-0.0457033	-3.92945	-0.253902	0.0615917	0.333762	0.843506	0.000899043	0.45894	2.08351e-24	1.79542e-42	0.0154652	0.855501	0.865553	0.976775
172	gamma-glutamylphenylalanine	1900	TRUE	-2.21373	0.0650671	0.0537644	0.621746	0.0625303	0.0146604	0.0443806	2.09107	-2.24244	1.35676e-62	0.334174	0.280152	2.26998e-47	0.338004	5.42413e-14	7.56906e-43	0.18253	0.0961362	0.865553	0.87768
453	palmitoleate (16:1n7)	1900	TRUE	-0.351861	0.0654503	0.0507357	-0.790998	0.0629257	0.00392478	0.0156227	4.18757	-5.03653	0.00833617	0.334243	0.311046	1.15036e-74	0.337864	0.0453415	1.57737e-06	0.00796707	0.000203461	0.865553	0.880426
292	citrulline	1900	TRUE	-0.463772	-0.0677291	0.0919636	0.188558	-0.230684	0.0239756	-0.0265537	6.02134	-1.58134	0.000824799	0.336533	0.0773877	2.77077e-05	0.000727035	6.32315e-32	4.2063e-15	0.000242903	0.261972	0.866518	0.709714
613	(2 or 3)-decenoate (10:1n7 or n8)	1900	TRUE	0.44718	0.0701999	-0.000422809	-0.226186	-0.0819434	0.000499541	-0.0132321	-12.2187	-0.833191	0.00186403	0.336549	0.99375	1.22943e-06	0.246838	0.813139	0.000161103	6.76194e-13	0.568534	0.866518	0.995254
220	1-stearoyl-2-linoleoyl-GPE (18:0/18:2)*	1900	TRUE	-0.713273	0.0704725	0.134277	-0.204145	-0.0151261	0.00505684	0.0180672	-3.8617	-6.94674	8.0996e-07	0.337545	0.0133963	1.34755e-05	0.831714	0.0173743	3.02959e-07	0.0240011	2.28964e-06	0.866591	0.545072
800	ceramide (d16:1/24:1, d18:1/22:1)*	1900	TRUE	-1.39756	0.0690874	0.0372385	0.0483919	0.00137788	0.0147922	0.0232452	4.14357	-5.37631	7.63715e-23	0.338531	0.485073	0.293617	0.984278	1.40945e-12	1.9754e-11	0.0136867	0.000196605	0.866639	0.949816
678	deoxycholic acid (12 or 24)-sulfate*	1900	TRUE	-0.183613	0.0711164	0.0773261	-0.00624625	0.141294	-0.00580568	0.0151446	-4.11961	-2.20026	0.21124	0.340701	0.160894	0.895696	0.0506741	0.0071756	2.37329e-05	0.0177633	0.140571	0.86809	0.781914
558	X - 14056	1900	TRUE	-1.11727	0.0688012	-0.0740666	0.216457	0.17517	4.80736e-05	0.0362509	3.40871	-4.82186	3.9139e-15	0.341036	0.16538	2.69532e-06	0.0123296	0.981654	1.46424e-25	0.0427598	0.000850234	0.86809	0.781914
860	1-carboxyethylvaline	1900	TRUE	-2.23073	0.0635218	-0.000363104	0.470472	0.278968	0.012856	0.0494911	-3.76426	-2.3334	2.48387e-64	0.34267	0.994143	3.41253e-28	1.69175e-05	3.17465e-11	1.62878e-53	0.0157292	0.081408	0.86978	0.995254
717	1-palmitoyl-GPI (16:0)	1900	TRUE	-0.502611	-0.0695982	-0.00490163	-0.158142	-0.402008	0.0101008	0.00463149	4.80458	0.881902	0.00053058	0.345131	0.928299	0.000777724	1.80702e-08	2.17967e-06	0.190643	0.00512352	0.549812	0.872729	0.987601
334	1-stearoyl-2-oleoyl-GPE (18:0/18:1)	1900	TRUE	-0.687076	0.0696753	0.122248	-0.0440746	0.209592	0.00188754	0.0193842	-2.20778	-2.30199	2.3028e-06	0.34578	0.025172	0.350141	0.00341332	0.377317	4.66013e-08	0.199454	0.119419	0.872729	0.58779
764	S-methylcysteine sulfoxide	1900	TRUE	0.806622	-0.0671209	0.0639831	-0.0940075	-0.189669	0.00859621	-0.0415566	2.0917	0.582546	1.04731e-08	0.348733	0.2267	0.0397796	0.00626502	3.35102e-05	1.26682e-33	0.209768	0.684322	0.87482	0.839351
293	1-stearoyl-GPI (18:0)	1900	TRUE	-0.531405	-0.0688421	0.0488187	-0.0928146	-0.300748	0.0168389	-0.00754959	0.865891	1.58517	0.000243697	0.349677	0.369418	0.0482326	2.46654e-05	2.6344e-15	0.032646	0.613401	0.281679	0.87482	0.916162
368	histidine	1900	TRUE	0.905035	0.0693672	-0.00235964	-0.134236	-0.100632	-0.0055352	-0.0205805	0.397461	1.59366	6.21213e-10	0.350927	0.965747	0.00468576	0.162414	0.0100869	8.17082e-09	0.818436	0.284014	0.87482	0.993822
88	1-(1-enyl-stearoyl)-2-linoleoyl-GPC (P-18:0/18:2)*	1900	TRUE	1.45058	0.0622849	-0.0522845	-0.210731	-0.485001	0.00842767	-0.060579	-3.09858	4.07683	2.52299e-28	0.351057	0.289395	7.69998e-07	6.55575e-14	1.29146e-05	1.29063e-79	0.0463094	0.00227714	0.87482	0.880426
70	N-palmitoyl-sphinganine (d18:0/16:0)	1900	TRUE	-1.35375	0.0677749	0.0410199	-0.00192739	-0.0615498	0.00824938	0.0337969	-0.617152	-3.90496	3.40103e-21	0.351904	0.44575	0.966919	0.382799	8.98256e-05	4.0533e-22	0.715802	0.00733241	0.87482	0.934338
260	1-stearoyl-2-linoleoyl-GPC (18:0/18:2)*	1900	TRUE	-0.035793	-0.0669837	0.0442304	-0.179724	-0.65533	0.0131391	-0.0157416	-1.71316	-3.69056	0.800653	0.352467	0.406008	9.29246e-05	5.93756e-21	2.8941e-10	5.31959e-06	0.307073	0.0104349	0.87482	0.926119
848	tartronate (hydroxymalonate)	1900	TRUE	1.06848	-0.0649375	0.0588945	-0.178995	-0.164778	0.00726639	-0.0475368	0.402205	-0.79112	1.35875e-14	0.357127	0.258353	6.99474e-05	0.0158541	0.000368423	8.62881e-45	0.806483	0.574906	0.875835	0.864491
595	1-(1-enyl-palmitoyl)-2-docosahexaenoyl-GPE (P-16:0/22:6)*	1900	TRUE	0.330959	0.0656195	-0.0813937	0.10568	0.0185792	0.0105838	-0.0307462	-12.6347	4.12178	0.0185385	0.358276	0.123033	0.0204603	0.7883	3.02933e-07	3.06604e-19	3.02795e-14	0.00391734	0.875835	0.74401
530	arachidoylcarnitine (C20)*	1900	TRUE	-0.311887	0.0610948	0.02132	0.506758	-0.229736	0.0272593	-0.0416191	-4.29423	-2.7581	0.0172703	0.358767	0.664706	8.74157e-33	0.000367248	1.77433e-45	9.08831e-39	0.00559755	0.0383422	0.875835	0.971569
149	3-indoleglyoxylic acid	1900	TRUE	0.2661	-0.0659021	-0.00354145	0.523548	-0.0367466	0.000484291	-0.017176	6.20365	0.261418	0.0601926	0.359741	0.946893	4.25314e-30	0.598055	0.816041	6.61671e-07	0.000213158	0.85588	0.875835	0.98883
117	X - 22789	1900	TRUE	0.157862	0.0672404	0.044368	0.129271	-0.050647	0.00394648	-0.0142115	-11.0358	0.467966	0.274627	0.359859	0.413541	0.0058201	0.47647	0.0632282	5.54905e-05	1.08609e-10	0.750051	0.875835	0.930021
803	X - 11372	1900	TRUE	0.663431	-0.065805	-0.0952745	0.426918	0.0540156	-0.0132474	-0.00564132	-4.92783	-0.286452	2.8953e-06	0.361217	0.0735997	1.69715e-20	0.439097	2.1045e-10	0.102997	0.00331764	0.842501	0.875835	0.709071
365	N-acetyltaurine	1900	TRUE	-0.688857	0.067512	0.144139	0.207953	0.0277066	0.0109395	0.00131745	3.39025	2.88742	2.22051e-06	0.361454	0.00836574	1.06387e-05	0.69902	3.19703e-07	0.710662	0.0490326	0.0510281	0.875835	0.545072
37	palmitoleoylcarnitine (C16:1)*	1900	TRUE	-1.08991	0.0655951	0.0602279	-0.0456355	-0.00841925	0.0231184	-0.000540885	-0.451536	-4.44623	1.48576e-14	0.362538	0.257854	0.320996	0.903968	1.36299e-28	0.875718	0.787772	0.00203227	0.875835	0.864491
142	X - 22776	1900	TRUE	0.0767822	-0.0678869	-0.0455638	-0.221414	-0.0263431	-0.00317944	0.00659043	-1.6618	-0.845268	0.600785	0.362634	0.408278	3.29526e-06	0.715343	0.140549	0.0656274	0.338502	0.570944	0.875835	0.926119
100	N-acetylhistidine	1900	TRUE	-0.683544	0.0641052	0.0496766	0.107819	-0.10054	0.0243269	-0.0191934	9.87817	3.19541	8.09806e-07	0.36265	0.339717	0.0164568	0.140505	7.24241e-33	1.36642e-08	1.69295e-09	0.0233004	0.875835	0.902068
661	gamma-glutamylglycine	1900	TRUE	0.347121	0.0646909	0.0653486	-0.280544	-0.246734	0.0102489	-0.0258882	10.4358	2.97236	0.0141504	0.368283	0.218693	9.81199e-10	0.000396361	8.35424e-07	6.38524e-14	4.55831e-10	0.0387722	0.880731	0.826789
644	2-hydroxybutyrate/2-hydroxyisobutyrate	1900	TRUE	-0.987562	0.0653008	-0.117759	0.230157	0.206357	0.00233483	0.0281233	-4.27399	-4.0168	4.83506e-12	0.368593	0.0282087	6.88522e-07	0.00335481	0.266477	7.2558e-16	0.0114876	0.00569414	0.880731	0.58779
143	2,3-dihydroxy-2-methylbutyrate	1900	TRUE	-0.426708	0.0638433	0.134934	0.464289	0.12294	0.0121161	-0.013985	1.21301	0.470026	0.00229167	0.369287	0.0102257	1.47539e-24	0.0742939	3.8735e-09	4.19063e-05	0.46377	0.741067	0.880731	0.545072
555	11beta-hydroxyandrosterone glucuronide	1900	TRUE	-1.46654	0.061023	-0.110556	0.745397	0.0858376	0.0124623	0.0210007	3.49766	-2.62645	5.85426e-28	0.369459	0.0277654	4.12319e-66	0.192476	2.3657e-10	1.24396e-10	0.0271466	0.0534698	0.880731	0.58779
857	X - 12007	1900	TRUE	-0.971213	-0.0654979	0.014875	0.321635	-0.006983	0.0144534	0.00549876	2.65353	2.60423	1.36703e-11	0.369592	0.782719	5.11016e-12	0.921334	7.71155e-12	0.116627	0.118469	0.0745129	0.880731	0.976775
89	tetradecadienoate (14:2)*	1900	TRUE	0.323052	0.0653001	0.0115305	-0.385305	-0.0327923	-0.000494715	-0.00531685	-7.46283	1.43436	0.0250689	0.372887	0.831368	1.76604e-16	0.644111	0.815491	0.130704	1.22046e-05	0.327825	0.885062	0.976775
758	catechol sulfate	1900	TRUE	0.416954	-0.0638392	0.0398036	0.162733	-0.112664	0.0116721	-0.0367575	4.14209	-1.70479	0.00313037	0.373386	0.45257	0.000378282	0.104852	1.84803e-08	1.31259e-26	0.0131157	0.234689	0.885062	0.934338
299	3-bromo-5-chloro-2,6-dihydroxybenzoic acid*	1900	TRUE	-0.717769	0.063486	-0.103093	0.216119	0.17329	-0.00470413	0.030824	2.32755	-3.40265	4.40412e-07	0.379393	0.0533798	2.76086e-06	0.0132502	0.0243627	6.09969e-19	0.166315	0.0185098	0.891412	0.653972
491	1-arachidonoyl-GPE (20:4n6)*	1900	TRUE	-0.049401	0.0648932	0.0924577	0.155944	0.227646	0.00139367	-0.00502689	7.94983	0.447735	0.733974	0.379715	0.0902984	0.00094297	0.00146659	0.514338	0.156352	3.80144e-06	0.761898	0.891412	0.709714
880	X - 21410	1900	TRUE	0.486526	-0.0606921	-0.0153372	0.51957	0.0329077	-0.0220008	0.0136146	-3.13068	-4.81483	0.00035305	0.380478	0.764219	6.12568e-32	0.62349	4.31271e-28	4.16508e-05	0.0520137	0.000504728	0.891412	0.976775
615	X - 11850	1900	TRUE	0.175371	0.0642046	0.0436728	-0.245276	0.0731051	0.00961294	-0.0205525	5.49705	5.78181	0.223673	0.380713	0.419681	1.55275e-07	0.302825	5.71669e-06	5.06088e-09	0.00126657	7.93578e-05	0.891412	0.931087
338	stearoylcholine*	1900	TRUE	-0.118139	-0.0640462	0.0590562	-0.00231749	-0.193559	0.0137641	-0.0188073	3.87385	-0.824665	0.411547	0.381039	0.274317	0.960396	0.00627533	7.65324e-11	8.39734e-08	0.0228658	0.572839	0.891412	0.87385
97	3-hydroxyhippurate	1900	TRUE	-0.34817	-0.0650213	0.0218167	0.0139456	-0.0729908	0.010235	-0.00482095	-1.47613	-4.275	0.0174151	0.382236	0.691524	0.769067	0.311242	1.99158e-06	0.177164	0.394217	0.0040785	0.891883	0.971569
624	threonine	1900	TRUE	0.425453	0.0650281	-0.037915	0.0498732	0.00301817	-0.00483504	-0.00746753	2.01928	2.95988	0.00382103	0.384328	0.492413	0.295905	0.966751	0.0253625	0.0374331	0.245946	0.0477528	0.892225	0.949816
572	1-docosahexaenoyl-GPC (22:6)*	1900	TRUE	0.597557	0.0602808	0.0224917	0.199097	-0.0498376	0.01475	-0.0493211	-1.12124	1.20503	1.28172e-05	0.386438	0.661856	7.41593e-06	0.459775	2.38328e-13	2.60454e-49	0.488995	0.386741	0.892225	0.971569
406	choline	1900	TRUE	-1.83348	0.0610574	0.0862919	0.347288	0.133729	0.0181261	0.0280318	0.0285828	-3.76697	7.12303e-40	0.386496	0.0976402	1.19475e-14	0.0502212	6.31115e-19	1.21228e-16	0.986108	0.00756318	0.892225	0.724821
679	2-palmitoyl-GPE (16:0)*	1900	TRUE	0.780432	0.0618193	0.0654269	0.00448646	0.0511632	0.00785217	-0.0426989	5.81258	-2.3984	2.8353e-08	0.386898	0.215211	0.921634	0.459739	0.00014534	1.4127e-35	0.000475399	0.0933068	0.892225	0.821098
230	linolenate [alpha or gamma; (18:3n3 or 6)]	1900	TRUE	0.0188312	0.0625854	0.0612554	-0.495014	-0.0163468	0.00419822	-0.00157829	-5.35683	-1.74352	0.894855	0.38742	0.252259	9.17609e-27	0.81572	0.0450657	0.649807	0.00148627	0.2287	0.892225	0.860453
552	1-stearoyl-2-oleoyl-GPI (18:0/18:1)*	1900	TRUE	0.496481	-0.0621115	0.096648	-0.215718	-0.510275	0.00737208	-0.0256914	3.9245	-0.0569385	0.000458096	0.388357	0.0692828	2.68701e-06	2.55546e-13	0.000401705	1.06621e-13	0.0192363	0.968466	0.892225	0.709071
105	1-stearoyl-GPE (18:0)	1900	TRUE	0.569304	0.0626666	0.137073	0.0576335	-0.0432832	0.00625813	-0.0331704	2.58004	-2.2623	7.25172e-05	0.390104	0.0109534	0.215621	0.540006	0.00301071	2.64078e-21	0.128582	0.120889	0.893302	0.545072
502	N-acetylcitrulline	1900	TRUE	-1.74548	0.0594368	0.0755512	0.331709	0.136019	0.0138941	0.0320312	5.8592	9.17258	2.54854e-37	0.392357	0.141164	7.52447e-14	0.0433031	4.79933e-12	7.83283e-22	0.000292877	4.13734e-11	0.893302	0.775969
73	ergothioneine	1900	TRUE	0.0398581	0.0608622	0.00422596	0.224572	0.0348531	0.0163288	-0.0325492	-10.226	-2.86336	0.775895	0.392365	0.935937	7.64085e-07	0.613094	2.1539e-15	1.59291e-21	6.72437e-10	0.044249	0.893302	0.987601
263	N-oleoyltaurine	1900	TRUE	-0.292631	0.0625207	0.0505027	-0.310485	-0.0503352	0.0123078	-0.00680976	2.28198	0.637791	0.0422985	0.393296	0.350695	3.10696e-11	0.478007	6.29267e-09	0.0527646	0.180818	0.663308	0.893302	0.907226
881	N-acetylvaline	1900	TRUE	-1.62573	0.0609381	0.0326183	0.241529	0.118728	0.0169937	0.0244408	3.79026	-0.891006	7.99083e-31	0.394556	0.537391	1.2468e-07	0.0868143	2.27253e-16	1.13507e-12	0.0229412	0.533726	0.893302	0.952189
845	glucuronide of piperine metabolite C17H21NO3 (4)*	1900	TRUE	-1.08862	-0.061742	0.01236	0.30515	0.119434	0.00452812	0.0265932	-5.69844	-3.39779	2.44382e-14	0.394808	0.817669	4.442e-11	0.0892621	0.0309946	2.26498e-14	0.000743194	0.0192289	0.893302	0.976775
396	linoleoylcholine*	1900	TRUE	0.187708	-0.061403	0.0731166	-0.0474581	-0.33001	0.0120393	-0.0255708	2.94812	-1.76458	0.188488	0.397286	0.172519	0.305392	2.64547e-06	9.64406e-09	2.08857e-13	0.0808873	0.223945	0.896502	0.78866
638	sphingomyelin (d18:1/21:0, d17:1/22:0, d16:1/23:0)*	1900	TRUE	-1.08449	-0.0600925	-0.0812807	-0.298337	-0.400389	0.0190735	0.0128984	7.35805	0.552299	9.32231e-15	0.398223	0.121991	5.01286e-11	6.21325e-09	1.88706e-20	0.00015859	8.8783e-06	0.697898	0.896502	0.74401
353	X - 23997	1900	TRUE	0.0617242	0.0604893	-0.0396148	-0.145037	0.0647939	0.0125436	-0.0221606	12.0105	2.47493	0.663137	0.400933	0.456581	0.00160417	0.352971	1.73671e-09	1.45423e-10	7.88531e-13	0.0857807	0.898027	0.935664
206	X - 18899	1900	TRUE	1.2381	-0.0611615	-0.0334218	0.0355973	-0.0902852	-0.0058875	-0.03363	-2.21419	1.07704	6.20668e-18	0.401617	0.535063	0.444414	0.201185	0.00525812	7.48552e-22	0.192184	0.460282	0.898027	0.952189
689	5,6-dihydrouridine	1900	TRUE	-1.33287	-0.058494	0.0891829	0.0775883	0.0249945	0.0142021	0.0210908	16.928	-0.198562	3.35239e-22	0.402762	0.0842616	0.0820935	0.712061	2.188e-12	3.29411e-10	2.48261e-25	0.887088	0.898027	0.709714
108	sphingomyelin (d18:2/23:1)*	1900	TRUE	-1.29163	-0.0574466	-0.0157356	-0.53676	-0.39495	0.0141227	0.0314921	1.23982	0.149472	1.44675e-21	0.403838	0.756966	2.4461e-34	3.12465e-09	1.30508e-12	1.53224e-21	0.439043	0.913531	0.898027	0.976775
524	1-eicosapentaenoyl-GPE (20:5)*	1900	TRUE	-0.369155	-0.0588455	0.0501054	0.151768	0.126689	0.0219454	-0.0275078	5.30668	-0.240839	0.00800959	0.40556	0.337829	0.000777807	0.0645191	8.0549e-27	5.54245e-16	0.00127526	0.864871	0.898027	0.902068
297	cys-gly, oxidized	1900	TRUE	-0.163949	0.0602727	0.113569	0.387447	-0.146466	0.000333621	-0.000540459	11.002	0.125841	0.252255	0.407556	0.0346849	7.39969e-17	0.0377377	0.874095	0.87706	8.40825e-11	0.931113	0.898027	0.63384
528	pseudouridine	1900	TRUE	-1.58003	-0.0573588	0.0817895	0.281681	-0.0389393	0.020867	0.0161462	14.548	-0.853641	4.86788e-31	0.407899	0.110239	1.92704e-10	0.561908	2.3038e-25	1.21725e-06	1.96113e-19	0.538067	0.898027	0.726279
385	N-acetyl-2-aminooctanoate*	1900	TRUE	-0.31442	-0.0571036	0.0479013	0.567141	0.025127	0.015064	-0.0228363	7.81091	6.3983	0.0210868	0.409803	0.349403	1.19434e-37	0.708092	5.65398e-14	6.5913e-12	1.28318e-06	3.89383e-06	0.898027	0.907226
384	glucuronide of piperine metabolite C17H21NO3 (3)*	1900	TRUE	-1.13138	-0.0596761	0.0171984	0.272516	0.127419	0.00456015	0.0284947	-6.95873	-3.49664	2.08481e-15	0.410115	0.748004	3.79828e-09	0.0694263	0.029581	2.55211e-16	3.70221e-05	0.0158314	0.898027	0.976775
265	gamma-tocopherol/beta-tocopherol	1900	TRUE	-1.11278	-0.0594635	0.0854169	0.0835402	0.0419738	-0.000870005	0.0392581	-4.01609	-3.01269	5.1225e-15	0.410701	0.109749	0.0701993	0.54885	0.677377	1.12291e-29	0.0170156	0.0371907	0.898027	0.726279
750	stearidonate (18:4n3)	1900	TRUE	-0.171818	0.0594438	0.0238135	-0.476629	0.182546	0.00804398	-0.0024744	1.81049	2.00748	0.227869	0.411696	0.656264	6.2347e-25	0.00925444	0.000123134	0.476583	0.282882	0.165765	0.898027	0.971569
276	octanoylcarnitine (C8)	1900	TRUE	-0.11628	0.0607781	-0.00438949	0.0372113	0.0363301	0.00773022	-0.00955982	-7.88741	1.97399	0.425441	0.412372	0.936139	0.431723	0.612965	0.00031359	0.00723537	4.90077e-06	0.183197	0.898027	0.987601
302	gamma-glutamylvaline	1900	TRUE	-2.04425	0.0538689	0.0273641	0.688706	0.192781	0.00948409	0.0460806	-8.07113	-1.69961	3.56326e-56	0.412891	0.573486	1.91213e-60	0.00248541	6.26047e-07	3.22737e-48	1.37003e-07	0.196524	0.898027	0.961962
642	X - 11849	1900	TRUE	0.0108579	-0.0597527	0.0692237	-0.0260995	-0.0918017	0.00357732	-0.00578743	-9.95278	-9.76737	0.940031	0.415276	0.201503	0.577221	0.196329	0.0918272	0.100256	5.6101e-09	2.79113e-11	0.898027	0.798683
474	hippurate	1900	TRUE	0.13619	-0.0582182	-0.00929752	-0.0026402	-0.1952	0.0165841	-0.0321643	5.88911	1.70498	0.33493	0.417331	0.860843	0.954049	0.00499438	1.39302e-15	1.01832e-20	0.000425444	0.235049	0.898027	0.978029
890	guanidinoacetate	1900	TRUE	0.400298	0.0569935	-0.106839	0.607418	-0.161287	0.00231378	-0.0248014	-0.92324	3.29834	0.00384804	0.418081	0.0399397	1.19113e-41	0.0179968	0.255827	2.13277e-13	0.573171	0.0191419	0.898027	0.63384
325	X - 11847	1900	TRUE	0.294969	-0.0593913	0.0493173	0.126905	-0.152498	0.00357486	-0.0176574	-7.03337	-5.40922	0.041232	0.418684	0.363434	0.00678696	0.0320586	0.0924574	5.48858e-07	3.89968e-05	0.000231249	0.898027	0.916162
747	N6-acetyllysine	1900	TRUE	-1.08466	0.0581812	0.017468	0.120124	0.11034	0.0153308	0.00972597	11.5832	-3.4791	1.88748e-14	0.418924	0.742583	0.00893754	0.113534	1.81192e-13	0.00488337	4.79374e-12	0.0156785	0.898027	0.976775
610	N2,N5-diacetylornithine	1900	TRUE	-0.463611	0.05558	0.0437713	0.20098	-0.0447317	0.0264194	-0.0320836	6.9006	5.08593	0.000623684	0.419649	0.389697	4.83583e-06	0.502522	3.95027e-40	2.89391e-22	1.68118e-05	0.000222622	0.898027	0.919286
736	1-palmitoyl-GPC (16:0)	1900	TRUE	0.63571	0.0565671	0.079921	0.401518	-0.24092	0.00577939	-0.0377616	4.75781	-2.7618	4.30879e-06	0.420991	0.123877	3.61101e-19	0.000402969	0.00448526	4.5698e-29	0.00364934	0.0495171	0.898027	0.74401
333	S-methylcysteine	1900	TRUE	0.741497	-0.0584701	0.0897485	-0.0247701	-0.183862	0.00475718	-0.0338624	0.177607	-0.0817373	2.30442e-07	0.422182	0.0954377	0.594246	0.00917118	0.0239908	3.56108e-22	0.916601	0.955267	0.898027	0.720053
607	indoleacetate	1900	TRUE	0.06851	0.0585192	-0.0143725	0.345179	0.28762	0.00442767	-0.0160586	1.84704	-2.11827	0.633396	0.422761	0.789884	1.28434e-13	4.75172e-05	0.0360339	4.5966e-06	0.277158	0.146875	0.898027	0.976775
190	X - 11478	1900	TRUE	-0.191029	-0.0589848	-0.000569926	0.0535905	0.220152	-0.00603963	0.0160159	-9.5635	-5.88843	0.187076	0.422805	0.991637	0.253911	0.00201159	0.00455424	5.79553e-06	2.3796e-08	6.32431e-05	0.898027	0.995254
77	mannose	1900	TRUE	-2.3681	0.0517636	-0.0697025	0.218962	0.26942	0.00539412	0.0712107	0.631514	1.12619	1.83475e-77	0.422955	0.144207	1.09563e-07	1.66547e-05	0.003898	1.10067e-116	0.674577	0.383457	0.898027	0.780954
150	1-(1-enyl-palmitoyl)-2-myristoyl-GPC (P-16:0/14:0)*	1900	TRUE	0.893141	-0.0574865	-0.122555	-0.210117	-0.391954	0.000568446	-0.0271067	11.0068	3.85603	2.8122e-10	0.424285	0.0211465	4.75779e-06	1.86515e-08	0.784776	4.22201e-15	5.00875e-11	0.0073765	0.898721	0.545072
203	5-acetylamino-6-formylamino-3-methyluracil	1900	TRUE	-0.430039	-0.0591316	-0.103397	0.0989628	-0.0538227	0.00705234	0.0032409	0.572991	-5.02444	0.00328462	0.426383	0.0597929	0.0370292	0.454816	0.00104165	0.363825	0.740617	0.000728177	0.899498	0.680403
167	3-hydroxy-3-methylglutarate	1900	TRUE	-0.826881	0.0552026	0.0707448	-0.0849169	0.764135	0.0160961	-0.0015448	5.88386	-0.678721	1.43692e-09	0.426659	0.167977	0.0554071	6.64317e-30	1.13001e-15	0.643089	0.00027362	0.625121	0.899498	0.781914
677	X - 21353	1900	TRUE	0.212975	0.0584857	0.0162997	-0.0157854	-0.0832411	6.21481e-05	-0.00706424	-11.5818	0.836404	0.143331	0.429053	0.765488	0.738091	0.245252	0.976827	0.0466211	1.74233e-11	0.571813	0.900968	0.976775
858	X - 24546	1900	TRUE	1.50585	0.0494197	-0.0758896	0.56758	-0.20146	-0.035896	0.00174193	-9.01039	-1.26759	2.38096e-34	0.429971	0.100951	9.12014e-46	0.000895543	2.193e-87	0.562261	6.39417e-10	0.311526	0.900968	0.72554
875	16a-hydroxy DHEA 3-sulfate	1900	TRUE	0.58384	-0.0529103	-0.0407699	0.414175	-0.161527	-0.0273159	0.021961	-7.86919	-4.49882	1.00572e-05	0.431011	0.411531	4.59869e-22	0.0130726	7.4407e-45	9.86912e-12	4.90035e-07	0.000816117	0.900968	0.930021
573	X - 22162	1900	TRUE	-0.498139	-0.0554561	0.073281	-0.0302979	-0.00433353	0.0183817	-0.0140598	12.2938	-5.94629	0.000346911	0.433229	0.161057	0.502377	0.949591	2.73566e-19	3.49175e-05	8.54067e-14	2.6592e-05	0.900968	0.781914
647	quinate	1900	TRUE	-0.112968	-0.0576248	-0.0699259	0.0655757	-0.132409	0.0108585	-0.0143141	8.59553	-2.01765	0.435542	0.433834	0.198676	0.162931	0.0633765	3.43819e-07	5.12833e-05	5.32833e-07	0.170702	0.900968	0.798683
408	X - 23739	1900	TRUE	-0.458846	0.0558997	0.0011876	0.452448	-0.136265	0.0131084	-0.0119172	7.69365	0.796837	0.00112493	0.434904	0.982088	4.12354e-23	0.0494159	2.46587e-10	0.000525202	3.91685e-06	0.577911	0.900968	0.995254
352	X - 11315	1900	TRUE	0.696374	-0.0538158	0.0682797	0.0974349	-0.185257	0.0159749	-0.0529907	-0.373177	-1.15514	2.84558e-07	0.435034	0.180114	0.0268213	0.00553501	1.15151e-15	1.06603e-57	0.816159	0.402232	0.900968	0.798683
146	7-methylguanine	1900	TRUE	-0.917453	-0.0571665	0.0304205	0.341052	-0.072951	0.00825244	0.0142794	1.84533	-3.28458	2.0156e-10	0.435506	0.574386	3.13877e-13	0.304272	9.97873e-05	4.96005e-05	0.279636	0.0250981	0.900968	0.961962
725	1-linoleoyl-2-linolenoyl-GPC (18:2/18:3)*	1900	TRUE	0.829317	-0.0548131	0.104088	-0.133294	-0.538913	0.00876065	-0.0408041	-0.75897	-2.51094	2.17392e-09	0.436407	0.0454801	0.00302712	2.80129e-15	1.7107e-05	1.54718e-33	0.643474	0.0746952	0.900968	0.63384
523	4-cholesten-3-one	1900	TRUE	-1.58947	-0.0556296	0.133485	0.0370746	-0.23786	0.0154063	0.0300284	0.434688	-1.33218	3.5532e-29	0.440024	0.0121573	0.420136	0.000653509	1.45011e-13	3.87989e-18	0.795526	0.355277	0.901266	0.545072
849	sulfate*	1900	TRUE	-1.15768	-0.0554616	0.00291861	-0.167805	0.118634	0.0158228	0.0157947	7.43611	0.564351	2.67414e-16	0.440238	0.956164	0.000253935	0.0883257	2.72125e-14	4.68309e-06	8.81231e-06	0.694609	0.901266	0.991578
699	3-hydroxylaurate	1900	TRUE	0.0627711	0.0573463	-0.028894	-0.216284	-0.0187504	0.00375835	-0.00545119	-5.624	1.87086	0.667907	0.440569	0.598954	5.19218e-06	0.794611	0.0806156	0.126729	0.00115998	0.208452	0.901266	0.971569
768	7-methylxanthine	1900	TRUE	-0.270458	-0.0563256	0.0520868	0.0561232	-0.122675	0.00734288	-0.00360908	13.2304	-2.65965	0.060693	0.442095	0.336046	0.230191	0.0839391	0.000532759	0.304912	8.85374e-15	0.069601	0.901266	0.902068
805	proline	1900	TRUE	-1.0953	0.0536502	0.0101853	0.551342	0.245263	-0.00287033	0.0351269	0.575468	-0.557184	1.81612e-15	0.443345	0.843863	5.43611e-35	0.000297224	0.156309	1.39249e-25	0.723977	0.690636	0.901266	0.976775
525	X - 23639	1900	TRUE	-0.0786323	-0.0533435	-0.0118138	0.033043	-0.19657	0.0227597	-0.0356495	9.18039	-1.47505	0.566858	0.444592	0.818766	0.458178	0.00363541	1.75814e-29	1.89595e-26	1.5983e-08	0.290612	0.901266	0.976775
588	pregnenediol sulfate (C21H34O5S)*	1900	TRUE	1.6772	0.0466049	-0.0483625	0.786629	-0.336644	-0.0304199	-0.0164292	-1.77245	-0.741739	2.52923e-44	0.445107	0.283533	1.16665e-90	1.23952e-08	1.63323e-66	2.05514e-08	0.212289	0.543481	0.901266	0.880426
196	X - 11858	1900	TRUE	0.431206	-0.0561839	0.0802508	0.00744695	-0.146968	0.00155136	-0.017913	-5.88422	-2.85546	0.00296716	0.446214	0.140876	0.874319	0.0396802	0.467203	4.21387e-07	0.000611453	0.0529391	0.901266	0.775969
863	glutamine conjugate of C6H10O2 (1)*	1900	TRUE	-0.887201	-0.0561248	0.0917218	-0.0762825	-0.0772771	0.0145057	0.00758673	1.20815	-1.51161	9.41192e-10	0.446245	0.0920499	0.104835	0.278946	1.01257e-11	0.0319706	0.481296	0.305094	0.901266	0.717189
508	1-pentadecanoyl-2-docosahexaenoyl-GPC (15:0/22:6)*	1900	TRUE	0.400633	0.0538972	-0.0342488	-0.225843	-0.15066	0.0158188	-0.0373583	-0.111503	-1.05315	0.00410809	0.447454	0.513552	6.13791e-07	0.0283634	1.28963e-14	5.41531e-28	0.946183	0.458039	0.901266	0.949816
212	carotene diol (1)	1900	TRUE	1.0433	-0.0503628	0.018432	-0.059737	-0.321625	0.0164254	-0.0627675	-3.86302	0.760538	1.29779e-15	0.447615	0.706812	0.158209	5.5418e-07	1.11942e-17	1.60295e-86	0.012357	0.566441	0.901266	0.975814
614	N-acetylthreonine	1900	TRUE	-1.19555	0.0536346	0.0534942	0.577139	-0.0296419	0.0105687	0.0162044	4.02092	1.47497	1.18973e-17	0.450191	0.30808	4.07203e-37	0.666602	2.70202e-07	2.01235e-06	0.0150429	0.299218	0.901653	0.880426
626	ximenoylcarnitine (C26:1)*	1900	TRUE	-0.72379	-0.0522929	0.0592327	0.611978	-0.292015	0.0203114	-0.0159769	-3.53561	-5.1535	1.10834e-07	0.450484	0.24735	1.5692e-43	1.35991e-05	4.01178e-24	1.56623e-06	0.0284282	0.000200985	0.901653	0.859016
581	palmitoylcholine	1900	TRUE	0.104734	-0.0548752	0.0512983	-0.00723496	-0.211782	0.0124986	-0.0243946	4.79692	-1.22592	0.464919	0.451206	0.340497	0.876337	0.00268451	3.00284e-09	3.02184e-12	0.00467453	0.400107	0.901653	0.902068
741	creatinine	1900	TRUE	-0.350033	0.0466147	0.043866	1.12273	-0.136675	0.00456403	-0.0105821	6.72878	6.4718	0.00408998	0.451833	0.337964	2.80835e-177	0.022767	0.0108888	0.000373987	3.09364e-06	1.77047e-07	0.901653	0.902068
76	12,13-DiHOME	1900	TRUE	1.15948	-0.0533476	0.0112822	-0.402076	-0.265489	0.000477832	-0.0352506	0.606814	1.22547	1.71067e-16	0.455623	0.830904	1.26028e-18	0.000126571	0.817324	9.69852e-25	0.715492	0.391564	0.904839	0.976775
707	2-ketocaprylate	1900	TRUE	0.544115	-0.0541453	-0.020898	0.181601	-0.103173	0.00534103	-0.0301982	1.3078	-1.76609	0.000144379	0.45677	0.69748	9.22342e-05	0.143223	0.0111682	5.34687e-18	0.44011	0.224948	0.904839	0.971569
376	docosadioate (C22-DC)	1900	TRUE	0.528144	0.0553267	-0.072556	0.181542	-0.0251792	-0.00551905	-0.0112401	-0.874729	1.34587	0.000306461	0.456825	0.186623	0.000130797	0.726647	0.0102978	0.00163872	0.613368	0.365526	0.904839	0.798683
32	methyl glucopyranoside (alpha + beta)	1900	TRUE	0.479308	-0.0531184	0.0590832	-0.0840549	0.0325909	0.0131388	-0.0389267	-1.06036	-1.34522	0.000687371	0.459152	0.265136	0.066494	0.639161	2.46782e-10	1.31101e-29	0.525647	0.348663	0.904839	0.87385
114	X - 19438	1900	TRUE	-0.454117	0.0528571	-0.0234723	0.519214	0.228425	-0.00718928	0.0202609	0.162228	-4.46832	0.00128019	0.460777	0.657564	7.3894e-30	0.000999841	0.000525081	3.87912e-09	0.922546	0.00182659	0.904839	0.971569
424	X - 16580	1900	TRUE	-0.926182	0.0537916	-0.0355612	0.161373	0.0101923	0.0160218	0.00360811	2.75605	-1.51412	1.11647e-10	0.461031	0.50955	0.000531292	0.885348	3.21677e-14	0.303022	0.10477	0.299594	0.904839	0.949816
301	methylsuccinate	1900	TRUE	-0.694927	0.0540876	-0.014986	-0.00585614	-0.0211268	0.0167442	-0.00369783	4.81299	2.20641	1.54858e-06	0.461811	0.782597	0.900668	0.766671	3.42526e-15	0.294648	0.00491695	0.133436	0.904839	0.976775
281	phosphatidylcholine (18:0/20:2, 20:0/18:2)*	1900	TRUE	-0.174582	-0.0535308	0.0430561	-0.231375	-0.434789	0.0134172	-0.0117862	-0.771769	-3.96972	0.223464	0.462648	0.423977	6.57555e-07	7.33241e-10	1.9725e-10	0.00075528	0.649242	0.00646925	0.904839	0.931087
349	4-hydroxyphenylpyruvate	1900	TRUE	-1.41195	-0.0526276	-0.0319909	-0.0772959	0.164821	0.00747168	0.0380603	3.01552	2.11045	1.44303e-23	0.46306	0.546042	0.0913214	0.0176656	0.000316824	2.07813e-28	0.0709296	0.141254	0.904839	0.956905
756	1-methylhistidine	1900	TRUE	-0.900564	0.0511688	0.0223117	0.60157	0.163268	0.0142185	-0.00181697	7.57675	1.60692	5.50272e-11	0.463528	0.665309	1.53608e-41	0.0157494	1.90973e-12	0.587664	3.13113e-06	0.249787	0.904839	0.971569
200	fructose	1900	TRUE	-0.326054	-0.0547244	0.00329904	-0.0451926	-0.0336137	0.00481674	0.00415648	0.317876	0.89967	0.0271384	0.465569	0.952526	0.345141	0.643569	0.0264134	0.248291	0.855544	0.548688	0.906847	0.990096
586	pyridoxate	1900	TRUE	-0.196669	-0.0516748	0.0547717	0.352649	0.119278	0.0143144	-0.0232645	8.65752	1.13418	0.159654	0.467199	0.296977	7.66845e-15	0.083186	3.36735e-12	9.21053e-12	1.68011e-07	0.425018	0.908049	0.880426
482	gamma-glutamylglutamine	1900	TRUE	0.307877	0.0524977	0.0311555	0.0501899	-0.212203	0.00657435	-0.0223457	8.83333	-2.52192	0.0307368	0.468521	0.560419	0.277613	0.00248713	0.00170198	1.29893e-10	1.61768e-07	0.0817081	0.908646	0.960277
284	cerotoylcarnitine (C26)*	1900	TRUE	-0.766808	-0.049284	0.025677	0.767232	-0.334403	0.0177801	-0.0117036	-4.09474	-1.42512	1.14162e-08	0.470353	0.610734	2.21244e-69	4.26422e-07	2.20987e-19	0.00035554	0.00999188	0.296677	0.91023	0.971569
138	ethylmalonate	1900	TRUE	-0.63244	0.0528814	0.0165451	-0.0338653	0.124901	0.00943419	0.00599627	7.95686	-6.78487	1.28583e-05	0.472905	0.761185	0.471463	0.080096	9.5919e-06	0.0900077	3.50868e-06	4.14767e-06	0.912883	0.976775
608	sulfate of piperine metabolite C16H19NO3 (3)*	1900	TRUE	-0.289152	-0.0527143	-0.0437858	0.332181	-0.0459592	-0.000166081	0.00687898	-1.30235	-2.19097	0.0470215	0.476175	0.423175	2.01361e-12	0.52135	0.938154	0.0527808	0.449644	0.13877	0.912883	0.931087
93	X - 21319	1900	TRUE	0.215375	-0.0528841	0.00761347	0.103232	0.151046	-0.00742009	0.00336204	-8.17815	-3.25643	0.140485	0.47636	0.88964	0.0294144	0.0357384	0.000552467	0.345623	2.24338e-06	0.0283571	0.912883	0.983351
809	1-(1-enyl-palmitoyl)-2-oleoyl-GPC (P-16:0/18:1)*	1900	TRUE	1.67925	0.0443263	-0.0669806	-0.384634	-0.453843	0.0126754	-0.0737138	3.61227	3.80449	1.19146e-42	0.477096	0.145944	4.24186e-22	5.68923e-14	2.10128e-12	6.15091e-134	0.0128277	0.00228328	0.912883	0.780954
526	N1-methylinosine	1900	TRUE	-2.18248	0.0486924	0.0783948	0.365313	-0.0551823	0.0170339	0.0428684	6.52823	-1.05957	2.95645e-58	0.479939	0.123752	1.01801e-16	0.408546	1.32079e-17	2.20639e-38	4.74783e-05	0.442212	0.912883	0.74401
303	3-methyl-2-oxobutyrate	1900	TRUE	-0.585663	0.0505572	-0.0111457	0.477882	0.129018	-0.00725211	0.0260696	-1.95708	-4.8843	3.2624e-05	0.480399	0.833243	1.47276e-25	0.0630197	0.000467273	3.4641e-14	0.240701	0.000654051	0.912883	0.976775
182	glycine conjugate of C10H12O2*	1900	TRUE	-1.08415	-0.0514734	0.0780463	0.290707	0.0276146	0.00474018	0.0257787	1.01726	-1.24484	4.56936e-14	0.480966	0.148124	4.50419e-10	0.696301	0.0248754	1.95e-13	0.549704	0.394184	0.912883	0.781914
330	vanillactate	1900	TRUE	-1.44994	-0.050067	0.13353	0.295388	-0.0270857	0.0212058	0.0104986	4.7077	5.21552	3.84956e-25	0.481569	0.0110752	7.77365e-11	0.694278	6.78914e-25	0.00211129	0.00447997	0.000247233	0.912883	0.545072
218	cortisone	1900	TRUE	1.67453	-0.0484246	-0.152576	0.228981	-0.0245049	-0.00682917	-0.0495451	-0.294101	1.78139	2.1243e-34	0.486444	0.00299938	2.52637e-07	0.716166	0.000692099	8.9445e-50	0.855938	0.200565	0.912883	0.514003
274	alpha-tocopherol	1900	TRUE	-0.713187	-0.0505657	0.123098	0.0753567	-0.0701664	0.0190925	-0.00866843	-0.756818	-0.0391641	6.3929e-07	0.487289	0.0221037	0.104861	0.319703	1.23691e-19	0.0131198	0.655215	0.978543	0.912883	0.545072
882	5-acetylamino-6-amino-3-methyluracil	1900	TRUE	-0.556119	-0.0510733	-0.0709402	0.107937	-0.0635655	0.0105267	0.0012485	8.66786	-3.42899	0.00012456	0.488067	0.192421	0.0216934	0.372979	7.81452e-07	0.724028	4.32083e-07	0.0199498	0.912883	0.798683
444	glucuronide of piperine metabolite C17H21NO3 (5)*	1900	TRUE	-1.13747	-0.0501907	0.0123542	0.280375	0.109925	0.0052044	0.0275793	-6.85706	-3.76421	1.60419e-15	0.489014	0.817715	1.40494e-09	0.117738	0.0131439	2.38607e-15	4.91076e-05	0.00948447	0.912883	0.976775
386	2-piperidinone	1900	TRUE	-0.193652	0.0497226	0.0539912	0.325699	0.017159	-0.000962293	0.00371408	-17.1535	-0.524844	0.173384	0.49156	0.312105	1.68452e-12	0.806421	0.645422	0.28451	2.16075e-24	0.716634	0.912883	0.880426
308	androstenediol (3beta,17beta) monosulfate (2)	1900	TRUE	0.912384	0.048338	0.0250305	-0.112543	0.0191407	-0.0267707	0.0144411	-1.27237	-7.0944	5.32094e-11	0.493946	0.631662	0.0125947	0.779761	3.51858e-39	2.0721e-05	0.439316	5.19483e-07	0.912883	0.971569
693	3-(4-hydroxyphenyl)lactate	1900	TRUE	-1.25799	-0.0450908	-0.0039813	0.913234	-0.0507188	0.00228081	0.0288198	2.25942	3.83762	3.1653e-22	0.494111	0.934877	2.24728e-104	0.427186	0.23187	8.71597e-20	0.141126	0.00362171	0.912883	0.987601
674	X - 16935	1900	TRUE	0.027212	-0.0466555	-0.0570207	0.241685	0.141803	-0.0167103	0.024901	-21.133	-0.252638	0.839559	0.494591	0.258575	2.97325e-08	0.0321031	2.76623e-17	3.10857e-14	2.71915e-40	0.853308	0.912883	0.864491
734	X - 21821	1900	TRUE	0.303841	-0.0500421	0.13399	0.041558	-0.0811259	0.00799676	-0.0257456	3.13338	1.94723	0.0358721	0.496481	0.0137288	0.376299	0.255073	0.000172458	3.14777e-13	0.0674252	0.185879	0.912883	0.545072
78	2-hydroxystearate	1900	TRUE	-0.126983	0.0502199	0.00353226	0.0128409	-0.0903564	0.00924481	-0.0114205	-1.80436	2.02766	0.386143	0.50005	0.948812	0.787044	0.210326	1.77588e-05	0.00139953	0.298002	0.173426	0.912883	0.989681
345	sphinganine-1-phosphate	1900	TRUE	0.195846	0.0497278	0.0772018	-0.0718118	-0.204134	0.0018098	-0.00877503	3.98252	-0.34471	0.181125	0.50404	0.160362	0.130641	0.00463295	0.400615	0.01405	0.0215483	0.816894	0.912883	0.781914
454	4-acetamidobutanoate	1900	TRUE	-1.44433	0.0468016	0.0107246	0.110444	0.128052	0.027804	0.00137463	1.18349	-2.64396	1.84621e-25	0.506113	0.836631	0.0139672	0.0603714	1.91794e-42	0.684151	0.470205	0.0604057	0.912883	0.976775
373	glycocholenate sulfate*	1900	TRUE	-0.31812	0.0491959	-0.0351744	0.208082	-0.12525	-0.00525783	0.0180114	1.76216	3.44553	0.0291522	0.506818	0.52066	1.09002e-05	0.0810398	0.014197	4.13907e-07	0.307152	0.0201164	0.912883	0.949816
116	glycerate	1900	TRUE	0.841242	-0.0464971	0.0359091	-0.151571	-0.151719	0.0118041	-0.0475857	3.80175	-0.633704	1.17691e-09	0.508215	0.489236	0.000728071	0.025834	6.40642e-09	3.55489e-45	0.0201562	0.652143	0.912883	0.949816
393	1-palmitoyl-2-linoleoyl-GPI (16:0/18:2)	1900	TRUE	-0.895449	-0.0472979	0.0374105	-0.297228	-0.471275	0.00260571	0.0334962	-0.275464	-3.86083	2.0529e-10	0.508774	0.479375	7.77125e-11	1.07055e-11	0.208302	1.89089e-22	0.868723	0.00701026	0.912883	0.948167
151	dimethylglycine	1900	TRUE	-0.871904	-0.0475504	0.00151234	0.446541	0.123059	0.00887031	0.00945132	-5.8282	-1.21372	7.45584e-10	0.508857	0.977314	2.50322e-22	0.0775673	2.04666e-05	0.00623376	0.000505687	0.399238	0.912883	0.995254
721	1-oleoyl-2-linoleoyl-GPE (18:1/18:2)*	1900	TRUE	0.262904	0.0488081	0.120437	-0.238326	-0.0214459	0.00236553	-0.0114032	-0.919147	-5.51796	0.0706692	0.509045	0.0274402	4.38942e-07	0.764537	0.268631	0.00131065	0.593279	0.000189935	0.912883	0.58779
419	pipecolate	1900	TRUE	0.756307	0.0488729	-0.0102083	0.110883	-0.0354759	-0.00332737	-0.022722	5.08996	1.07351	2.14919e-07	0.50963	0.852125	0.0190896	0.621205	0.120708	1.70099e-10	0.00318152	0.469003	0.912883	0.976775
65	X - 11880	1900	TRUE	0.237193	-0.047625	-0.0957273	0.299886	0.219493	-0.0152358	0.0137276	-8.80295	0.162393	0.0951871	0.509728	0.0729076	7.85209e-11	0.00170866	3.09649e-13	7.5447e-05	1.66095e-07	0.910521	0.912883	0.709071
53	1-margaroyl-2-arachidonoyl-GPC (17:0/20:4)*	1900	TRUE	0.133943	0.0474994	-0.0709102	0.0144546	0.643214	0.000664843	-0.0087482	5.51179	9.50283	0.345426	0.5103	0.183457	0.753619	3.45536e-20	0.750084	0.0115423	0.0010335	4.55692e-11	0.912883	0.798683
851	1-docosapentaenoyl-GPC (22:5n3)*	1900	TRUE	-0.161867	0.0468409	0.108351	0.380118	-0.066712	0.013937	-0.0241378	5.10242	1.51813	0.250167	0.512602	0.0403735	8.4679e-17	0.335676	1.64685e-11	2.08353e-12	0.00218763	0.288718	0.912883	0.63384
192	succinylcarnitine (C4-DC)	1900	TRUE	-1.76807	0.0455883	0.0341377	0.539868	0.140956	0.0158105	0.0274171	4.05859	0.212166	6.91215e-38	0.513877	0.508232	9.2199e-34	0.0371812	5.04533e-15	2.87964e-16	0.0125542	0.879278	0.912883	0.949816
519	1-eicosenoyl-GPC (20:1)*	1900	TRUE	1.31001	0.0425357	0.104971	0.22062	-0.299879	0.0115353	-0.0690859	1.53519	-0.806808	2.69026e-24	0.515827	0.0299882	1.29249e-07	2.25316e-06	1.12123e-09	4.06728e-107	0.313806	0.53779	0.912883	0.597098
224	10-undecenoate (11:1n1)	1900	TRUE	0.273425	0.0482142	-0.0297037	0.157528	-0.0792285	0.00220344	-0.0151862	-1.92211	0.655339	0.0619295	0.517159	0.589147	0.000915031	0.271843	0.306203	2.13912e-05	0.267398	0.659837	0.912883	0.971569
856	glyco-beta-muricholate**	1900	TRUE	0.702251	0.0477901	0.0600789	-0.139561	-0.0287388	-0.00156062	-0.0212123	-1.88117	2.67913	1.35258e-06	0.517616	0.270964	0.00307513	0.68792	0.46518	2.19887e-09	0.274001	0.0697791	0.912883	0.87385
628	lignoceroylcarnitine (C24)*	1900	TRUE	-0.486018	0.0473467	0.0111945	0.258793	-0.168009	0.014523	-0.0102767	-4.15465	-4.08742	0.000753935	0.518387	0.836275	3.19742e-08	0.0179872	7.51289e-12	0.00349974	0.0149309	0.00531499	0.912883	0.976775
602	X - 18922	1900	TRUE	-0.352371	0.0478988	-0.0229078	0.0450855	0.0185197	0.00769247	-0.00133504	-6.00818	2.33959	0.0159523	0.519174	0.676506	0.341831	0.796946	0.00034568	0.70821	0.000514991	0.115474	0.912883	0.971569
507	myristoleate (14:1n5)	1900	TRUE	0.0752787	0.043158	0.0117299	-0.870887	-0.0125441	-0.000612098	0.0100663	4.11157	-3.16933	0.56959	0.521197	0.813458	1.94498e-91	0.84736	0.75315	0.00182813	0.00866806	0.0185184	0.912883	0.976775
475	pregnenediol disulfate (C21H34O8S2)*	1900	TRUE	0.854527	0.0416472	-0.0150721	0.715161	-0.231945	-0.0242666	0.00270586	-8.42068	-3.1064	2.41405e-11	0.521867	0.753752	1.58841e-66	0.000231074	4.53616e-38	0.386048	2.66833e-08	0.0169304	0.912883	0.976775
489	X - 12729	1900	TRUE	0.640805	-0.0458872	0.0440142	0.0696987	-0.018885	-0.00209356	-0.0201377	-15.9087	6.98162	5.65904e-06	0.522477	0.406424	0.12806	0.78584	0.313184	5.02522e-09	1.68472e-21	1.14807e-06	0.912883	0.926119
649	maltose	1900	TRUE	0.216818	0.0467602	-0.0902926	-0.064798	-0.049747	-0.0119596	0.0145325	-6.33627	2.76163	0.132943	0.523699	0.0956321	0.166266	0.48372	1.72722e-08	3.65733e-05	0.000206344	0.0597443	0.912883	0.720053
568	isovalerylglycine	1900	TRUE	0.151278	0.0464866	0.0128794	0.0440451	-0.0201328	0.00972824	-0.0230991	12.2732	2.53084	0.292276	0.524259	0.81128	0.344548	0.775866	4.09883e-06	4.35991e-11	5.16245e-13	0.0830669	0.912883	0.976775
485	homocitrulline	1900	TRUE	-0.0992843	0.0466896	0.0484735	0.052897	0.214484	0.00866599	-0.0136913	3.26131	0.583071	0.494485	0.527267	0.374391	0.261836	0.00271666	4.9938e-05	0.000112632	0.0578787	0.693077	0.912883	0.919052
540	1-oleoyl-2-dihomo-linolenoyl-GPC (18:1/20:3)*	1900	TRUE	-0.304905	0.0459978	0.0828703	-0.301139	-0.0996023	0.00184368	0.0111607	11.2707	-1.57112	0.0338337	0.528744	0.124555	1.04212e-10	0.159086	0.382805	0.0014535	3.3737e-11	0.282093	0.912883	0.74401
439	uracil	1900	TRUE	0.505686	0.0463999	-0.0294237	0.24412	0.0836311	-0.00657741	-0.010301	-5.6326	2.22822	0.000488292	0.52896	0.588967	2.11093e-07	0.2414	0.00203597	0.00359609	0.00102859	0.130665	0.912883	0.971569
249	citrate	1900	TRUE	-0.459736	-0.0456626	0.0117393	-0.243776	-0.0865344	0.0190498	-0.0122765	-1.05141	2.26291	0.00132266	0.530292	0.827154	1.53225e-07	0.219539	1.43456e-19	0.000440455	0.534844	0.120002	0.912883	0.976775
407	X - 15728	1900	TRUE	0.63277	-0.0463093	0.00518712	0.107784	-0.143981	-0.000653767	-0.0218798	3.37065	3.63324	1.31881e-05	0.530377	0.924224	0.02215	0.0440223	0.759472	6.61171e-10	0.0498275	0.0138587	0.912883	0.987601
431	X - 23644	1900	TRUE	-0.184892	-0.0467491	-0.027308	0.154213	-0.0792561	0.00794681	-0.0083224	3.62452	1.45639	0.207516	0.530597	0.620065	0.00119228	0.272405	0.000228992	0.0200465	0.036779	0.32874	0.912883	0.971569
655	branched-chain, straight-chain, or cyclopropyl 10:1 fatty acid (1)*	1900	TRUE	0.866341	-0.0445762	-0.0204869	-0.5673	-0.111112	-0.00122557	-0.0204063	7.38417	-0.579819	5.98854e-10	0.530802	0.696639	7.80195e-36	0.10677	0.551403	2.27315e-09	8.21798e-06	0.683585	0.912883	0.971569
775	1-linoleoyl-GPC (18:2)	1900	TRUE	1.35326	0.0411938	0.0764124	0.428673	-0.426929	0.00308672	-0.058112	4.21305	-3.19478	1.55787e-25	0.531589	0.116299	2.01135e-24	2.18271e-11	0.105167	1.78948e-75	0.00599645	0.0152884	0.912883	0.74401
739	sphingomyelin (d18:1/17:0, d17:1/18:0, d19:1/16:0)	1900	TRUE	-1.03911	-0.0457869	-0.0312874	-0.0578672	-0.281638	0.0165582	0.0115574	-0.691707	2.48722	5.6459e-13	0.531949	0.563241	0.21589	7.2174e-05	5.58056e-15	0.00101464	0.685071	0.0896247	0.912883	0.960734
181	1-oleoyl-2-dihomo-linoleoyl-GPC (18:1/20:2)*	1900	TRUE	1.04954	-0.0448704	0.020508	-0.185644	-0.287299	0.00378066	-0.0399203	-0.829391	-2.48654	1.09557e-13	0.532007	0.699075	5.10763e-05	3.6134e-05	0.0687425	5.08916e-31	0.619794	0.0833923	0.912883	0.971569
604	2-stearoyl-GPE (18:0)*	1900	TRUE	0.273135	0.045437	0.145852	0.0774171	0.0230556	0.00725833	-0.0252118	6.75243	-3.43231	0.0568544	0.53303	0.00676493	0.0961178	0.744007	0.000577072	5.7889e-13	6.92115e-05	0.0185643	0.912883	0.545072
3	orotate	1900	TRUE	-0.482799	-0.0458637	0.0292965	0.327676	-0.160378	0.00808025	-0.000267516	0.393118	-3.77138	0.000884801	0.534282	0.591077	3.49789e-12	0.0248622	0.000153892	0.939808	0.819028	0.0106238	0.912883	0.971569
96	1,3-dimethylurate	1900	TRUE	-0.602182	-0.0457007	-0.0363969	0.0685411	-0.0136179	0.0092557	0.00495104	10.056	-4.1566	3.2817e-05	0.535142	0.503837	0.145074	0.848698	1.41454e-05	0.161644	4.59685e-09	0.00480387	0.912883	0.949816
140	hexadecadienoate (16:2n6)	1900	TRUE	-0.448281	0.0444825	0.0606908	-0.512313	-0.0212221	0.00401897	0.0157145	-4.28028	-2.12587	0.00150663	0.53551	0.252566	5.12327e-29	0.760232	0.0529816	5.12217e-06	0.0104441	0.138771	0.912883	0.860453
208	5-oxoproline	1900	TRUE	0.0280797	0.0433727	0.101219	0.560196	0.00161384	0.0108865	-0.0281034	0.160837	-2.94365	0.838508	0.535631	0.0504171	4.88095e-36	0.981017	7.69132e-08	6.23634e-17	0.921411	0.0355808	0.912883	0.653972
582	1-palmitoyl-2-arachidonoyl-GPC (16:0/20:4n6)	1900	TRUE	-0.305876	0.0456518	-0.0698627	-0.0777938	0.2299	-0.000683161	0.012345	6.76728	4.368	0.0353702	0.536622	0.20061	0.0990181	0.00131571	0.749247	0.0005	8.34682e-05	0.00311921	0.912883	0.798683
83	sphingomyelin (d18:2/16:0, d18:1/16:1)*	1900	TRUE	-1.59577	-0.0416641	0.036518	-0.475213	-0.681459	0.0180627	0.0357221	-3.8965	0.258048	3.41717e-33	0.537456	0.464473	3.0991e-28	2.17401e-25	2.4436e-20	3.28801e-28	0.0132494	0.848575	0.912883	0.940761
381	X - 14939	1900	TRUE	0.181771	-0.0441846	-0.0115241	0.269045	0.128988	-0.00747017	0.00274171	-17.8941	-1.05475	0.197412	0.537552	0.827723	4.07407e-09	0.063164	0.000314675	0.425512	7.86901e-27	0.461887	0.912883	0.976775
322	biliverdin	1900	TRUE	0.277517	0.0437037	-0.00270968	0.551653	-0.0359909	0.00449243	-0.0250376	1.6306	-2.17093	0.0469531	0.538132	0.9588	4.27181e-34	0.600699	0.0287102	2.02851e-13	0.323863	0.126308	0.912883	0.992015
766	1-palmitoyl-2-eicosapentaenoyl-GPC (16:0/20:5)*	1900	TRUE	-0.600764	-0.044272	-0.020964	0.0267136	0.147373	0.0207054	-0.0149386	5.23158	1.24812	2.2026e-05	0.538355	0.693341	0.56081	0.0344733	2.60029e-23	1.52624e-05	0.00179087	0.385835	0.912883	0.971569
54	X - 21285	1900	TRUE	0.671946	-0.0422899	0.00304316	0.592085	0.107527	-0.0198675	0.00188706	-2.82128	-5.72382	7.73043e-07	0.54052	0.952471	4.37887e-41	0.108164	2.82826e-23	0.569435	0.07949	3.45556e-05	0.912883	0.990096
295	phosphatidylcholine (16:0/22:5n3, 18:1/20:4)*	1900	TRUE	0.0807577	-0.0450569	0.0505326	0.0266033	0.0159539	0.00884027	-0.0185069	0.760854	2.91999	0.57745	0.54079	0.353226	0.57157	0.823091	3.35481e-05	1.66721e-07	0.657337	0.0475302	0.912883	0.909454
112	X - 12101	1900	TRUE	-0.405221	-0.0448478	0.0359613	-0.108254	0.0629217	0.013118	-0.00696285	-1.08996	-1.33123	0.00520638	0.542882	0.509055	0.021397	0.378159	7.65773e-10	0.0490905	0.525339	0.366571	0.912883	0.949816
503	dihomo-linolenoylcarnitine (C20:3n3 or 6)*	1900	TRUE	-0.600066	0.0428038	0.0580647	0.69115	-0.00310176	0.00860262	-0.00325494	2.99128	-3.09017	1.49188e-05	0.543358	0.264524	2.46596e-53	0.963737	2.42174e-05	0.335706	0.068131	0.0282771	0.912883	0.87385
92	N,N-dimethylalanine	1900	TRUE	0.298937	-0.045501	-0.0498888	0.072483	0.0676828	0.00104844	-0.0132119	-1.28938	-0.19879	0.0426598	0.543783	0.367654	0.129749	0.351191	0.628713	0.000240616	0.459968	0.894511	0.912883	0.916162
202	X - 21470	1900	TRUE	0.799847	0.0410182	0.02353	0.361116	-0.0357272	-0.0282558	0.0150221	-8.8792	-3.62077	1.93489e-09	0.544664	0.638139	6.54635e-17	0.585955	3.64747e-47	3.81266e-06	1.78007e-08	0.00751215	0.912883	0.971569
401	sphingomyelin (d18:1/19:0, d19:1/18:0)*	1900	TRUE	-1.42385	-0.043226	-0.0335008	-0.290143	-0.191652	0.0178486	0.0256225	1.06117	1.76388	3.68009e-24	0.544704	0.525213	1.89796e-10	0.0055634	5.37072e-18	7.48338e-14	0.523042	0.216588	0.912883	0.949816
825	asparagine	1900	TRUE	1.25018	0.0427757	-0.00801296	0.12207	-0.192288	-0.000324372	-0.0447508	4.80678	1.36517	3.64017e-19	0.546913	0.878619	0.00707884	0.0051815	0.874538	2.28604e-39	0.0036448	0.336497	0.912883	0.983351
186	serine	1900	TRUE	1.28967	0.0430993	-0.0376629	-0.271042	-0.152917	-0.00178771	-0.038219	-4.20114	0.0696423	5.59686e-20	0.5473	0.476622	3.04629e-09	0.0275022	0.388221	1.04139e-28	0.011751	0.961227	0.912883	0.944808
847	palmitoylcarnitine (C16)	1900	TRUE	-1.11996	0.0429314	-0.00665775	0.558374	-0.0140985	0.0140944	0.00845926	-2.59593	-4.04571	1.57134e-15	0.547674	0.899581	1.66197e-34	0.838481	8.91815e-12	0.0135932	0.118411	0.00461782	0.912883	0.983351
518	X - 23636	1900	TRUE	0.49484	-0.0442518	0.000874294	0.000181644	0.0528608	-0.00653662	-0.00647492	-1.89599	-0.616814	0.000776051	0.554217	0.987382	0.996965	0.465771	0.00252869	0.0714322	0.276418	0.680235	0.912883	0.995254
113	glutamine	1900	TRUE	0.0966536	0.0420272	0.0212175	0.349836	-0.22649	0.0130729	-0.0298841	4.91032	-0.267744	0.49025	0.554996	0.686712	1.38537e-14	0.00102318	2.19854e-10	2.26274e-18	0.00305491	0.850877	0.912883	0.971569
119	isoleucylglycine	1900	TRUE	-0.0107659	0.043402	0.075903	0.0880221	-0.132278	0.0127128	-0.0227217	1.66142	-0.545189	0.940732	0.555328	0.162727	0.0609444	0.0634957	2.35118e-09	1.2604e-10	0.332197	0.711103	0.912883	0.781914
477	sulfate of piperine metabolite C16H19NO3 (2)*	1900	TRUE	-0.317327	-0.0435996	-0.0474146	0.309976	-0.050758	-0.000263	0.00839165	-1.17936	-1.80083	0.0292697	0.55564	0.385733	5.23944e-11	0.478767	0.902203	0.0181373	0.493548	0.223647	0.912883	0.919286
789	ceramide (d18:2/24:1, d18:1/24:2)*	1900	TRUE	-1.09534	0.0431582	0.0870288	-0.00782445	-0.24821	0.0133617	0.0168555	-3.40764	-4.33201	3.73994e-14	0.557278	0.109225	0.867614	0.000493044	3.37284e-10	1.80042e-06	0.0465623	0.0032296	0.912883	0.726279
705	arachidonoylcarnitine (C20:4)	1900	TRUE	-0.616972	0.0391883	0.00662096	0.888506	0.112982	0.01142	-0.0102406	2.00875	-0.695796	2.77228e-06	0.558012	0.893445	3.72866e-96	0.0812428	3.61973e-09	0.00142896	0.197165	0.603087	0.912883	0.983351
6	2-hydroxydecanoate	1900	TRUE	0.596364	-0.0420766	-0.0147277	0.134749	-0.193091	0.00911323	-0.0375102	4.14199	-0.444017	2.48958e-05	0.558359	0.781584	0.00332075	0.00555824	1.1776e-05	1.6258e-27	0.0133406	0.757502	0.912883	0.976775
538	X - 15469	1900	TRUE	0.227184	0.0415586	0.0671703	0.509291	-0.137131	0.00504259	-0.0232607	-4.37516	-0.0105386	0.105274	0.559858	0.20217	4.37767e-29	0.047017	0.0144699	1.06192e-11	0.00838024	0.994103	0.912883	0.798683
560	1-(1-enyl-palmitoyl)-2-linoleoyl-GPE (P-16:0/18:2)*	1900	TRUE	0.415075	0.0426546	-0.00361897	0.215583	-0.209933	-0.000888332	-0.015147	-11.7459	-0.192826	0.0039516	0.560051	0.946648	3.94464e-06	0.00306654	0.674838	1.62672e-05	5.48097e-12	0.895219	0.912883	0.98883
242	1-oleoyl-GPC (18:1)	1900	TRUE	1.23079	0.0377417	0.098561	0.292169	-0.216027	0.0112185	-0.0671142	7.9184	-1.18179	8.1353e-22	0.562493	0.0406706	2.1622e-12	0.000621229	2.67475e-09	4.30394e-102	1.80142e-07	0.364628	0.912883	0.63384
622	1-myristoyl-2-palmitoyl-GPC (14:0/16:0)	1900	TRUE	-0.221397	-0.0422902	-0.0566761	-0.245121	-0.118971	0.00223222	0.00815375	10.9498	-2.87948	0.124114	0.563281	0.294495	1.53575e-07	0.0932368	0.291646	0.0202709	1.29771e-10	0.0491404	0.912883	0.880426
402	3-indoxyl sulfate	1900	TRUE	-0.0889184	0.0426927	-0.0214268	0.176055	0.222094	0.00137808	-0.00287627	7.47449	-1.00195	0.540808	0.563394	0.69471	0.000189324	0.00191505	0.519127	0.417428	1.39372e-05	0.497824	0.912883	0.971569
131	arabonate/xylonate	1900	TRUE	-0.754225	0.0403037	0.1203	-0.0451788	-0.0286872	0.0263965	-0.0190556	8.96718	0.112835	4.43678e-08	0.565002	0.0200976	0.312248	0.672421	8.60623e-39	1.45095e-08	3.82426e-08	0.935811	0.912883	0.545072
126	glycerol	1900	TRUE	-0.888774	0.0380967	-0.00423798	-0.807773	0.0484244	0.00682753	0.0307556	-2.7503	-1.00002	9.64922e-12	0.565613	0.931071	3.4236e-81	0.45091	0.000372234	4.3897e-22	0.0748458	0.45089	0.912883	0.987601
612	2-linoleoyl-GPC (18:2)*	1900	TRUE	1.0695	0.0390338	0.0568007	0.341134	-0.361024	0.00577671	-0.0517677	6.60932	-1.94165	1.32034e-15	0.565966	0.25829	3.87615e-15	4.23604e-08	0.00332152	1.24716e-56	2.98778e-05	0.153464	0.912883	0.864491
33	X - 21310	1900	TRUE	0.314166	0.042427	0.01793	0.0874727	0.20924	-0.0033831	-0.00819025	5.33578	1.27103	0.0323464	0.569565	0.74498	0.0662345	0.00378672	0.117006	0.022205	0.00212752	0.394373	0.912883	0.976775
611	dihomo-linoleoylcarnitine (C20:2)*	1900	TRUE	-0.420532	-0.0393018	0.0994661	0.591054	-0.180211	0.0176774	-0.0227457	-5.22165	-6.29003	0.00198633	0.569588	0.0514438	6.24283e-41	0.00710579	9.47943e-19	7.10465e-12	0.00117464	5.36921e-06	0.912883	0.653972
273	carotene diol (3)	1900	TRUE	1.2322	-0.0396443	0.028601	-0.0657987	-0.273522	0.00533815	-0.0509244	-3.21895	1.94895	2.79894e-19	0.569847	0.578992	0.139514	5.17414e-05	0.00817033	3.23717e-52	0.047503	0.162524	0.912883	0.96427
635	ursodeoxycholate	1900	TRUE	-0.228415	0.0417263	-0.0462863	0.129834	0.115112	-0.00676638	0.0178603	-10.0094	-6.31543	0.113985	0.569945	0.393698	0.00561558	0.105654	0.00144997	4.07063e-07	4.81573e-09	1.71739e-05	0.912883	0.919286
377	N-acetylneuraminate	1900	TRUE	-0.790317	0.0419364	0.00608348	-0.0762301	0.0703602	0.0067893	0.0168837	3.82625	2.66511	5.58001e-08	0.570619	0.911342	0.106298	0.32594	0.00150488	1.9715e-06	0.0262512	0.0715697	0.912883	0.98551
760	X - 21441	1900	TRUE	0.910443	0.0405363	-0.0424269	0.210063	-0.000605323	-0.0228416	0.00397384	-4.8824	1.60188	1.00696e-10	0.571071	0.422313	4.24852e-06	0.993032	2.63659e-28	0.247362	0.00338473	0.263097	0.912883	0.931087
82	tryptophan betaine	1900	TRUE	0.875356	-0.0411341	0.036689	-0.194264	-0.191584	-0.00590533	-0.0179333	12.1264	-1.11356	1.0334e-09	0.572467	0.495661	2.96729e-05	0.00664998	0.00509645	2.962e-07	8.89673e-13	0.444946	0.912883	0.949816
599	sulfate of piperine metabolite C18H21NO3 (1)*	1900	TRUE	0.16591	-0.0407524	0.0323724	0.42509	-0.0285275	-0.00240284	-0.00739175	-5.75702	-2.79458	0.246946	0.575755	0.54743	5.9846e-20	0.685916	0.254079	0.0344869	0.000685428	0.0550587	0.912883	0.956905
336	p-cresol sulfate	1900	TRUE	0.087075	0.0400035	-0.0416329	-0.104157	0.0785799	0.0131949	-0.0247375	12.7095	2.64745	0.536496	0.576314	0.431258	0.0226523	0.257159	1.88032e-10	6.11909e-13	2.4426e-14	0.0644984	0.912883	0.934338
746	N-behenoyl-sphingadienine (d18:2/22:0)*	1900	TRUE	-1.0199	0.0411302	0.101033	0.00974427	-0.18911	0.0140766	0.012173	-4.34474	-1.3867	2.24699e-12	0.577585	0.0641027	0.836244	0.00820627	4.44807e-11	0.000595948	0.0115134	0.347898	0.912883	0.683762
743	1-palmitoyl-2-adrenoyl-GPC (16:0/22:4)*	1900	TRUE	-0.565631	0.0407097	0.0135126	0.0117722	-0.0293007	-0.00519734	0.0285275	7.56289	1.21293	8.59005e-05	0.578084	0.802702	0.801067	0.679411	0.0141107	4.7091e-16	9.08549e-06	0.407419	0.912883	0.976775
817	benzoate	1900	TRUE	-0.2473	0.0411422	-0.0518322	-0.216583	-0.0514667	-0.0009543	0.0140162	-1.83511	0.859444	0.0902129	0.579145	0.344316	4.78258e-06	0.473827	0.656548	8.28521e-05	0.28799	0.562444	0.912883	0.902068
130	xanthurenate	1900	TRUE	-0.237217	0.0392847	-0.0544459	0.513996	-0.0455018	-0.0126341	0.023487	5.08273	-2.00247	0.0900048	0.580632	0.300084	9.97778e-30	0.508871	8.17777e-10	5.97062e-12	0.00214051	0.159184	0.912883	0.880426
137	adenine	1900	TRUE	-0.987975	-0.0405131	0.104923	0.0261441	-0.0141045	0.0105164	0.0161506	1.45455	0.176752	9.57888e-12	0.582522	0.0540111	0.578391	0.843382	8.12857e-07	4.99843e-06	0.396624	0.904567	0.912883	0.653972
877	kynurenine	1900	TRUE	-1.72694	-0.0383201	0.0126409	0.486499	-0.0514402	0.0111471	0.0358648	10.3862	-3.38475	2.7564e-36	0.582847	0.806298	8.8748e-28	0.446578	3.34178e-08	9.3535e-27	1.61951e-10	0.0152975	0.912883	0.976775
769	X - 13729	1900	TRUE	-0.72359	0.0398792	-0.0411454	-0.0830363	0.0326012	0.0152336	0.00063295	10.1025	5.29585	4.21602e-07	0.583264	0.443633	0.0735178	0.643358	4.35766e-13	0.856066	2.38323e-09	0.000270303	0.912883	0.934338
669	glycosyl-N-behenoyl-sphingadienine (d18:2/22:0)*	1900	TRUE	-0.0637619	-0.0393937	-0.018256	-0.117825	-0.74961	0.0135255	-0.0152221	0.151399	2.10309	0.651905	0.583401	0.730872	0.010178	4.59672e-27	7.58405e-11	1.01318e-05	0.927869	0.143278	0.912883	0.976775
673	X - 21286	1900	TRUE	-0.370314	0.0406916	-0.0218267	-0.149047	0.190616	0.00738064	0.00153279	0.877598	1.95544	0.011215	0.583474	0.690594	0.00165305	0.0080101	0.000586675	0.66702	0.611517	0.18775	0.912883	0.971569
247	1-margaroyl-2-docosahexaenoyl-GPC (17:0/22:6)*	1900	TRUE	0.544628	-0.0379748	0.0120084	-0.0415624	0.0322889	0.0170533	-0.04778	-9.43539	-0.016601	6.55123e-05	0.583893	0.814674	0.347675	0.630681	1.8672e-17	9.91475e-47	5.06894e-09	0.99045	0.912883	0.976775
152	docosahexaenoate (DHA; 22:6n3)	1900	TRUE	0.316408	0.039122	-0.00492089	-0.177551	0.0955476	0.0158207	-0.0364525	-6.78618	0.819592	0.0244374	0.584064	0.925748	9.92663e-05	0.167489	1.97106e-14	2.2608e-26	4.52922e-05	0.566398	0.912883	0.987601
329	cyclo(ala-pro)	1900	TRUE	-0.624792	-0.0403396	0.00369961	0.366171	0.0713866	0.00536544	0.00788898	2.1265	-1.36794	1.63956e-05	0.584075	0.945826	6.9779e-15	0.317253	0.0118406	0.0257386	0.215171	0.353374	0.912883	0.98883
708	acisoga	1900	TRUE	-0.73914	-0.0402589	0.0272452	0.0814319	0.0970821	0.012405	0.00356876	0.522111	-2.1463	3.66259e-07	0.58571	0.617622	0.0841328	0.174808	6.42247e-09	0.314184	0.761428	0.146305	0.912883	0.971569
102	sphingomyelin (d18:1/22:2, d18:2/22:1, d16:1/24:2)*	1900	TRUE	-1.16375	-0.0371855	-0.00350545	-0.492681	-0.46814	0.00482702	0.0424031	0.565267	-0.123986	5.45679e-18	0.586822	0.944724	1.64668e-29	1.62972e-12	0.0147513	4.01705e-38	0.722729	0.927822	0.912883	0.98883
490	urea	1900	TRUE	-1.10381	0.0371758	-0.014182	0.62047	0.0707617	0.0206001	-0.00487153	7.77655	-0.314874	3.8395e-16	0.589415	0.780524	3.24269e-45	0.288921	4.79076e-25	0.140709	1.24238e-06	0.819244	0.912883	0.976775
807	1-linoleoyl-2-docosahexaenoyl-GPC (18:2/22:6)*	1900	TRUE	0.931996	0.0365957	0.00583808	-0.0111201	-0.166129	0.0163008	-0.0603868	2.54475	3.3724	2.85157e-12	0.58942	0.907242	0.797252	0.0114335	9.63218e-17	8.12085e-77	0.107005	0.0129095	0.912883	0.985319
533	1-(1-enyl-oleoyl)-2-docosahexaenoyl-GPE (P-18:1/22:6)*	1900	TRUE	0.704752	0.0374926	-0.0536284	0.0297719	0.0124422	0.0135559	-0.0481467	-10.5942	2.89374	2.61255e-07	0.589852	0.296707	0.502486	0.853484	1.61771e-11	3.89289e-47	6.06737e-11	0.0375327	0.912883	0.880426
761	dihomo-linolenoyl-choline	1900	TRUE	-0.44061	-0.039487	0.0326837	-0.0303592	-0.197113	0.0102745	-0.00090616	6.68455	-0.72412	0.00244881	0.593169	0.549526	0.519906	0.00590203	1.54723e-06	0.798424	0.000102574	0.624287	0.912883	0.956905
802	4-hydroxy-2-oxoglutaric acid	1900	TRUE	0.161956	-0.039934	-0.0282257	-0.251039	-0.0693825	-0.00372364	0.00470418	-0.419164	-2.17192	0.271404	0.593603	0.609734	1.47824e-07	0.338504	0.0854487	0.190393	0.80989	0.146809	0.912883	0.971569
422	cis-4-decenoate (10:1n6)*	1900	TRUE	-0.102613	0.0390186	0.00447776	-0.210318	-0.0106938	-5.09738e-06	0.00683521	-12.5028	1.31326	0.476511	0.594258	0.934065	6.85605e-06	0.880201	0.998081	0.051922	2.28508e-13	0.370102	0.912883	0.987601
827	margaroylcarnitine (C17)*	1900	TRUE	-0.695361	0.0383285	-0.0224794	0.453079	-0.0122012	0.013182	-0.00357652	0.920367	-3.68396	9.85859e-07	0.59552	0.673488	8.29623e-23	0.861507	2.77636e-10	0.302142	0.584041	0.0107487	0.912883	0.971569
23	X - 12100	1900	TRUE	-1.72882	-0.0373703	0.0737223	0.146177	-0.113122	0.0226596	0.0205609	9.75332	-0.0468025	1.87726e-35	0.597118	0.158195	0.00119989	0.098594	1.60518e-28	1.38123e-09	3.12641e-09	0.973601	0.912883	0.781914
879	X - 13866	1900	TRUE	0.00647305	0.0381254	-0.00718039	0.215573	0.071976	0.0129128	-0.0255124	-7.07112	0.45342	0.96372	0.598078	0.89311	3.01635e-06	0.30422	6.75825e-10	2.007e-13	2.67651e-05	0.753956	0.912883	0.983351
257	methionine sulfone	1900	TRUE	-0.569379	-0.0376045	0.0345404	-0.135663	0.0484702	0.0227511	-0.0172511	2.49117	-1.70323	5.02034e-05	0.598241	0.512446	0.00290044	0.483202	3.07478e-28	4.76776e-07	0.133802	0.232814	0.912883	0.949816
865	1-(1-enyl-palmitoyl)-2-palmitoyl-GPC (P-16:0/16:0)*	1900	TRUE	1.13327	0.0370866	-0.0498491	-0.0026316	-0.551261	0.00137654	-0.0398049	4.50473	5.10516	3.68037e-16	0.599778	0.339816	0.953486	8.1538e-16	0.500819	8.79567e-32	0.00619212	0.000305066	0.912883	0.902068
545	laurate (12:0)	1900	TRUE	0.730879	-0.0374314	-0.0229882	-0.604392	-0.0560137	-0.00219354	-0.0134474	2.08611	-0.245953	2.18076e-07	0.601436	0.664178	7.40053e-40	0.419704	0.29003	9.27064e-05	0.211188	0.863767	0.912883	0.971569
410	N-acetyl-1-methylhistidine*	1900	TRUE	-1.13055	0.0368754	0.0621154	0.317936	-0.0292799	0.0197344	0.00120049	10.0039	8.12253	4.68053e-16	0.602283	0.234828	1.93799e-12	0.669256	5.42448e-22	0.72379	1.26297e-09	9.55443e-09	0.912883	0.841623
835	X - 17340	1900	TRUE	-1.89875	0.0347487	-0.0500022	0.77722	-0.112742	0.00853369	0.0433199	-1.25531	-4.12732	6.11311e-47	0.604362	0.312946	1.15785e-73	0.0826539	1.09072e-05	2.86094e-41	0.421436	0.00209345	0.912883	0.880426
539	X - 17351	1900	TRUE	0.255053	-0.0378871	0.132528	-0.0013801	-0.122763	0.0107572	-0.0279401	3.24965	2.06914	0.0767419	0.604923	0.0143204	0.976448	0.083537	3.82984e-07	1.90845e-15	0.0566742	0.157818	0.912883	0.545072
757	1-stearoyl-2-oleoyl-GPC (18:0/18:1)	1900	TRUE	-0.168782	-0.0371926	-0.00422301	-0.150109	-0.104505	0.0162617	-0.0193546	6.20234	-1.37402	0.236386	0.607662	0.937115	0.00116939	0.136414	8.53744e-15	2.61488e-08	0.000235705	0.343019	0.912883	0.987601
791	X - 24306	1900	TRUE	-0.0694122	-0.0383315	0.0296789	0.0242365	-0.0469787	-0.000470608	0.0032133	-4.35468	-0.674884	0.638059	0.609235	0.592206	0.612622	0.517795	0.828266	0.372068	0.0126254	0.652766	0.912883	0.971569
836	3-methoxytyrosine	1900	TRUE	-0.0894062	0.0378492	0.0194215	-0.153692	-0.0963318	0.00838976	-0.00887669	-2.42844	7.82198	0.539531	0.609303	0.722651	0.00114944	0.179326	9.01067e-05	0.0125332	0.159024	1.2911e-07	0.912883	0.976775
698	2'-O-methyluridine	1900	TRUE	0.0136166	-0.0371485	0.012296	0.32399	-0.10388	0.00600641	-0.0146427	2.48898	6.99972	0.924359	0.610276	0.819398	3.31069e-12	0.141196	0.00439233	2.85346e-05	0.142458	1.57803e-06	0.912883	0.976775
250	cinnamoylglycine	1900	TRUE	0.604834	-0.0345846	0.0140081	-0.329686	-0.18243	0.0148515	-0.0418936	13.9453	4.72407	6.71869e-06	0.612447	0.781246	3.8672e-14	0.00580442	5.50049e-14	2.04986e-37	1.7363e-18	0.000541596	0.912883	0.976775
148	X - 17010	1900	TRUE	0.182041	0.0371818	-0.0112605	-0.125932	0.013354	-0.0101654	0.0126971	-8.00095	3.22378	0.207976	0.612816	0.835683	0.00724989	0.851164	1.73244e-06	0.000318478	2.90983e-06	0.0282712	0.912883	0.976775
5	tryptophan	1900	TRUE	0.0834041	0.0354102	-0.0444965	0.730189	-0.0172527	-0.00787145	0.000948212	1.71259	-2.83186	0.545587	0.613621	0.390514	8.22339e-60	0.799523	0.000104621	0.778219	0.294257	0.0435237	0.912883	0.919286
355	1-(1-enyl-stearoyl)-2-oleoyl-GPC (P-18:0/18:1)	1900	TRUE	1.06243	0.0327522	-0.0895092	-0.257538	-0.504478	0.0184579	-0.0628666	2.90665	4.29804	9.59403e-17	0.614217	0.062269	5.31968e-10	1.09936e-15	9.30993e-23	2.46565e-90	0.054691	0.000943446	0.912883	0.680403
839	octadecadienedioate (C18:2-DC)*	1900	TRUE	1.01774	-0.0368304	0.0372611	0.0509059	-0.121069	-0.00182478	-0.0335289	1.40239	-0.165911	1.66967e-12	0.615175	0.491262	0.276369	0.0880175	0.389286	1.52934e-21	0.411009	0.909865	0.912883	0.949816
787	gamma-CEHC	1900	TRUE	-0.540962	0.037568	0.0189116	0.0269862	0.109999	0.00254287	0.0136753	-2.24936	-1.0255	0.000236576	0.615402	0.732152	0.571838	0.128877	0.239836	0.000139318	0.196385	0.492983	0.912883	0.976775
811	2-naphthol sulfate	1900	TRUE	-0.335963	-0.036739	-0.00984742	0.174891	-0.0663843	-0.00894314	0.0254209	0.277779	4.85779	0.0196473	0.61566	0.855498	0.000181245	0.349046	2.40006e-05	4.63072e-13	0.8705	0.00090537	0.912883	0.976775
179	5alpha-pregnan-3beta,20beta-diol monosulfate (1)	1900	TRUE	1.67783	0.0342685	0.0135207	-0.50796	-0.156196	-0.0266663	-0.00677218	-1.59732	-0.716888	1.2113e-35	0.616502	0.789142	2.90704e-31	0.0184445	2.32478e-41	0.0392414	0.316043	0.600442	0.912883	0.976775
516	eicosenoylcarnitine (C20:1)*	1900	TRUE	-0.316772	0.0327909	0.0526211	0.479245	-0.131742	0.0286398	-0.0439257	-0.735273	-3.64146	0.0143315	0.617919	0.278667	3.2947e-30	0.0385604	3.0196e-51	4.87945e-44	0.630956	0.00561952	0.912883	0.87768
347	X - 16964	1900	TRUE	-0.548899	0.0359965	-0.0214802	0.450022	0.134952	0.0110083	-0.0059012	2.42299	-3.44955	0.000113434	0.618423	0.687495	1.75121e-22	0.053885	1.40078e-07	0.0889552	0.149871	0.0170231	0.912883	0.971569
262	alpha-hydroxyisocaproate	1900	TRUE	0.0779817	0.0316763	0.0176261	0.993123	0.000510655	-0.016232	0.0113932	-1.87995	0.295365	0.533769	0.618931	0.707989	8.4067e-132	0.993396	1.25503e-18	0.000194234	0.204868	0.816656	0.912883	0.975935
554	betaine	1900	TRUE	-0.50401	-0.0345796	0.0111029	0.624642	0.0571124	0.0143596	-0.0150948	-8.4007	-0.666228	0.000231532	0.619147	0.82899	6.11421e-45	0.396708	9.69779e-13	6.18931e-06	2.14372e-07	0.632112	0.912883	0.976775
215	X - 07765	1900	TRUE	-0.558557	-0.0360823	0.00938657	0.341363	0.1206	-0.0074135	0.0273374	1.52197	-0.0858545	9.38418e-05	0.619543	0.861233	1.857e-13	0.0866811	0.000421735	4.65791e-15	0.368394	0.952905	0.912883	0.978029
570	glycoursodeoxycholate	1900	TRUE	-0.311565	0.0362574	-0.046658	0.0526601	0.170606	-0.00477128	0.0181005	-10.3915	-5.83742	0.031775	0.622943	0.39182	0.263247	0.0169202	0.0253183	3.16925e-07	1.42663e-09	7.57606e-05	0.912883	0.919286
147	bilirubin (E,Z or Z,E)*	1900	TRUE	0.396672	0.0354833	-0.0651399	0.395498	0.0330713	0.000858647	-0.0206304	-1.25727	-1.27326	0.00560673	0.625866	0.225764	1.68863e-17	0.638987	0.683411	3.52908e-09	0.4581	0.38178	0.912883	0.839351
205	X - 12849	1900	TRUE	-0.445928	-0.0362399	-0.0220934	-0.0518594	0.120618	0.00625719	0.00541457	0.430623	-0.584439	0.00233081	0.626365	0.687911	0.275082	0.0943616	0.00366551	0.129716	0.803773	0.694682	0.912883	0.971569
324	1-palmitoleoyl-2-linolenoyl-GPC (16:1/18:3)*	1900	TRUE	-0.287788	-0.0352221	0.0933833	-0.360008	-0.310015	0.0107412	-0.00242289	2.16958	-7.44375	0.0435948	0.626982	0.081197	7.15408e-15	1.0062e-05	3.01114e-07	0.486197	0.198547	2.82931e-07	0.912883	0.709714
886	phenylalanine	1900	TRUE	-1.41929	0.0341857	0.00797408	0.571153	-0.0715789	0.00643314	0.0320487	-4.19427	-5.10261	1.50094e-24	0.627883	0.878385	7.00209e-37	0.294762	0.00161673	2.91708e-21	0.0106429	0.000298203	0.912883	0.983351
772	4-ethylphenylsulfate	1900	TRUE	0.67667	0.0355179	0.0749291	0.0260761	0.0139097	0.00239236	-0.0296708	6.43613	-2.53175	2.74366e-06	0.628166	0.166737	0.577505	0.844764	0.259495	3.52532e-17	0.000163686	0.0843766	0.912883	0.781914
50	N6-carbamoylthreonyladenosine	1900	TRUE	-2.08721	-0.0328221	0.0747008	0.484822	0.0499937	0.0191216	0.0341458	8.76331	-1.10146	3.53452e-55	0.628292	0.135901	3.93194e-29	0.446491	1.85849e-22	9.44681e-26	2.8281e-08	0.416671	0.912883	0.765831
144	X - 21607	1900	TRUE	0.267639	-0.0357845	-0.00974376	0.131814	-0.116696	0.0035465	-0.0163928	-8.12853	2.28224	0.0663302	0.629036	0.858705	0.00530786	0.103877	0.0979426	4.03041e-06	2.44023e-06	0.1235	0.912883	0.978029
364	2-arachidonoyl-GPE (20:4)*	1900	TRUE	-0.135799	0.0359028	0.0365163	0.100114	0.270783	0.00151877	-0.00117299	7.32584	1.11493	0.353257	0.629152	0.506212	0.0348913	0.000169849	0.480104	0.742414	2.31393e-05	0.453422	0.912883	0.949816
483	1-(1-enyl-palmitoyl)-2-palmitoleoyl-GPC (P-16:0/16:1)*	1900	TRUE	0.917084	-0.0332225	-0.0122508	-0.488554	-0.422424	0.00558735	-0.03351	10.7795	2.25073	1.70087e-11	0.631437	0.810794	2.1583e-28	3.0384e-10	0.00529259	6.83619e-24	2.30831e-11	0.10423	0.912883	0.976775
733	decadienedioic acid (C10:2-DC)**	1900	TRUE	-0.729164	0.0344791	0.057986	-0.219763	-0.026286	0.00408374	0.0213524	11.6172	-0.654647	2.54638e-07	0.631529	0.275029	1.67859e-06	0.705842	0.0496008	6.14765e-10	3.91808e-12	0.648959	0.912883	0.87385
434	phosphatidylcholine (15:0/18:1, 17:0/16:1, 16:0/17:1)*	1900	TRUE	-0.603657	0.0346676	-0.0586702	-0.212019	-0.0814415	0.0111171	0.00594536	10.9939	-4.3193	2.31728e-05	0.632493	0.273373	4.60843e-06	0.246134	1.1528e-07	0.0875639	7.33818e-11	0.0028951	0.912883	0.87385
821	etiocholanolone glucuronide	1900	TRUE	1.37281	-0.0325075	0.0205958	0.543091	-0.163662	-0.019996	-0.0214763	10.1469	2.26289	1.34162e-24	0.633343	0.682514	8.99811e-36	0.0131628	3.57382e-24	5.21027e-11	1.60282e-10	0.0969015	0.912883	0.971569
12	1-myristoyl-GPC (14:0)	1900	TRUE	-0.203161	0.0355074	0.0107007	0.0398343	-0.0594183	0.00216576	0.00274008	7.43003	-4.73852	0.165588	0.633482	0.845799	0.402008	0.410082	0.314744	0.443378	1.82338e-05	0.00146664	0.912883	0.976775
629	3-carboxy-4-methyl-5-pentyl-2-furanpropionate (3-CMPFP)**	1900	TRUE	-0.696178	-0.0344779	0.0237961	0.264919	0.0664866	0.0188755	-0.0114693	-1.44923	-3.45851	1.00366e-06	0.633634	0.656173	9.62086e-09	0.342701	1.89202e-19	0.000957491	0.389534	0.0168422	0.912883	0.971569
327	glucuronate	1900	TRUE	-1.12185	-0.0345719	-0.0264011	0.140443	0.0455049	0.0120643	0.0175694	1.78695	1.90941	4.56186e-15	0.634564	0.623253	0.0024867	0.518365	9.84889e-09	4.86073e-07	0.291336	0.189394	0.912883	0.971569
605	pregnenetriol disulfate*	1900	TRUE	0.329764	0.0313843	-0.0204122	0.67213	-0.201998	-0.0222215	0.018469	-9.06877	-4.33352	0.0113019	0.635216	0.676253	4.87282e-57	0.00162071	3.6433e-31	6.04944e-09	3.91699e-09	0.00105768	0.912883	0.971569
818	sphingomyelin (d18:2/18:1)*	1900	TRUE	-1.08155	0.0331072	-0.0117835	-0.453667	-0.418182	0.00452263	0.039092	-0.438559	0.580073	3.39252e-15	0.635237	0.819255	2.35145e-24	6.18302e-10	0.0250961	1.86318e-31	0.787245	0.67777	0.912883	0.976775
177	glycerophosphoethanolamine	1900	TRUE	0.482389	0.0351328	0.04907	0.182323	-0.0622462	-0.0022703	-0.0161088	-3.34072	1.56368	0.000937563	0.635388	0.3701	0.000115778	0.385797	0.289551	5.93428e-06	0.0528091	0.291416	0.912883	0.916162
286	glycine	1900	TRUE	0.879993	0.03301	0.023921	-0.447959	-0.224667	0.00883371	-0.0398684	9.84928	2.42659	1.41594e-10	0.635898	0.642415	7.8745e-24	0.000879384	1.19025e-05	1.03536e-32	1.30149e-09	0.0818793	0.912883	0.971569
574	N-acetylcarnosine	1900	TRUE	-0.525616	-0.0280792	-0.0351196	1.23003	0.045992	-0.004806	0.0107855	-4.29734	1.78944	6.67836e-06	0.635915	0.42292	1.52131e-231	0.423411	0.00509669	0.000151903	0.001859	0.131484	0.912883	0.931087
316	glycochenodeoxycholate	1900	TRUE	-0.48041	0.0349842	-0.0297305	0.094357	0.0479701	0.00190473	0.0123494	-8.56986	-3.39119	0.00102199	0.637908	0.588309	0.0467491	0.505284	0.375782	0.000538943	7.36227e-07	0.0225689	0.912883	0.971569
484	X - 24411	1900	TRUE	-0.572347	0.0347027	-0.0794817	0.211613	0.0732974	0.00272779	0.0133327	-8.46949	0.467782	8.26983e-05	0.63861	0.145456	7.24006e-06	0.305811	0.201943	0.000170872	8.52498e-07	0.751636	0.912883	0.780954
31	X - 11470	1900	TRUE	0.106059	0.0332889	-0.0889054	0.568357	-0.0316723	-0.00066172	-0.00983886	9.38214	-0.685991	0.447278	0.638814	0.0897909	3.7718e-36	0.644789	0.747076	0.00385606	1.33446e-08	0.628718	0.912883	0.709714
684	urate	1900	TRUE	-1.94566	-0.029205	0.0214912	0.965267	0.124158	0.00382624	0.0492314	-6.19023	-3.54428	1.68524e-56	0.639922	0.641288	1.28786e-129	0.0400611	0.0341321	1.22757e-60	2.05587e-05	0.00453709	0.91301	0.971569
356	2-hydroxyglutarate	1900	TRUE	-0.0168335	0.0345522	0.046358	0.166621	0.0185163	0.00815639	-0.0163227	2.11429	2.79961	0.908266	0.641656	0.398083	0.00043838	0.796819	0.000146247	4.6577e-06	0.221288	0.0594152	0.914028	0.919286
321	2-hydroxypalmitate	1900	TRUE	0.169167	0.0337847	-0.0174477	-0.0648494	-0.122759	0.0104124	-0.0224641	0.931309	0.914254	0.24405	0.647106	0.748995	0.168634	0.0859391	1.07798e-06	2.28749e-10	0.587818	0.535708	0.917048	0.976775
2	X - 16397	1900	TRUE	-1.12486	0.0329873	0.014338	0.213065	-0.085677	0.0163322	0.00934735	6.35966	-2.4189	3.51189e-15	0.649681	0.789325	4.30673e-06	0.223275	7.65609e-15	0.00734009	0.000169235	0.0959029	0.917048	0.976775
562	glycochenodeoxycholate 3-sulfate	1900	TRUE	-0.065891	0.0333201	-0.0195328	0.25689	0.0167836	-0.0066184	0.0102252	-8.22798	-0.974886	0.648549	0.650176	0.718989	4.30942e-08	0.813563	0.00184705	0.00374235	1.50934e-06	0.507105	0.917048	0.976775
252	X - 13835	1900	TRUE	-0.610403	-0.0324518	0.00564683	0.598776	0.00332767	0.00525748	0.00440708	6.75985	0.868835	1.46461e-05	0.650272	0.914971	3.06278e-39	0.96172	0.011119	0.199642	4.98608e-05	0.543964	0.917048	0.98551
486	X - 23678	1900	TRUE	-0.23333	-0.0334577	-0.0211727	-0.0104236	-0.143711	0.011303	-0.0097343	-1.28105	1.02445	0.110207	0.652225	0.699513	0.825902	0.0456729	1.41973e-07	0.00630794	0.458614	0.490286	0.917048	0.971569
38	1-dihomo-linoleoyl-GPC (20:2)*	1900	TRUE	0.838951	0.0321762	0.102283	0.188465	-0.381877	0.00462304	-0.0395495	0.377827	-2.61342	2.37047e-09	0.652314	0.0525793	3.5607e-05	3.38472e-08	0.0252469	8.69189e-31	0.820245	0.0673324	0.917048	0.653972
362	glutarate (C5-DC)	1900	TRUE	-0.245217	-0.0328808	-0.0456513	0.181181	0.0159891	0.000558422	0.00608802	-15.2763	1.69087	0.0881142	0.65273	0.397827	0.00010261	0.821287	0.791663	0.0826533	2.73444e-19	0.247357	0.917048	0.919286
15	hydroxyasparagine**	1900	TRUE	-3.32037	0.0267012	0.045382	-0.042225	-0.00638492	0.0344384	0.059196	8.36413	-0.432072	2.15084e-174	0.655964	0.305483	0.269733	0.912429	8.85408e-88	4.74618e-94	2.05113e-09	0.718557	0.917048	0.880426
226	1-myristoyl-2-arachidonoyl-GPC (14:0/20:4)*	1900	TRUE	-0.631787	0.0320822	-0.0340423	-0.356073	0.0828973	0.00264173	0.0223296	7.26328	-0.635806	9.10582e-06	0.657487	0.524299	1.26455e-14	0.236916	0.206956	1.28962e-10	1.62261e-05	0.660457	0.917048	0.949816
456	oxalate (ethanedioate)	1900	TRUE	0.954252	-0.0307228	0.0634789	-0.259209	-0.110086	0.0114076	-0.0500296	4.75722	-0.626839	2.95437e-12	0.658354	0.216271	5.07721e-09	0.1019	1.38471e-08	7.40084e-51	0.00327393	0.651969	0.917048	0.821098
557	N-acetylserine	1900	TRUE	-1.14318	-0.0320404	0.0449859	0.163304	0.0101431	0.0151606	0.0120171	8.80901	1.01279	1.26176e-15	0.659138	0.401926	0.000428158	0.885375	5.4135e-13	0.00056844	1.90116e-07	0.485771	0.917048	0.925774
233	alanine	1900	TRUE	-1.48745	-0.0314343	-0.0831052	0.199295	0.119727	0.00645974	0.0393258	-0.900532	-3.00704	4.77765e-26	0.6607	0.116282	1.30188e-05	0.084355	0.00182108	2.66846e-30	0.589131	0.035801	0.917048	0.74401
57	succinimide	1900	TRUE	0.483978	-0.0302985	0.000445107	0.637441	-0.0664621	0.00289241	-0.0304263	-1.60358	-0.431997	0.000370574	0.660979	0.993043	2.33963e-47	0.32064	0.147852	4.55445e-20	0.3188	0.754583	0.917048	0.995254
277	X - 24748	1900	TRUE	0.611389	-0.0324567	0.0202171	3.87654e-05	-0.00858847	-0.00151281	-0.0190564	-10.1461	-0.467594	2.73761e-05	0.661292	0.711866	0.999346	0.904732	0.480264	8.39195e-08	4.04118e-09	0.752343	0.917048	0.976775
777	undecenoylcarnitine (C11:1)	1900	TRUE	-0.646695	0.0317423	0.0371523	0.467283	-0.0430928	0.0111424	-0.00255351	-0.402029	-2.78238	6.00394e-06	0.661997	0.488637	6.64474e-24	0.540088	1.13133e-07	0.46383	0.812033	0.0554086	0.917048	0.949816
868	dopamine 3-O-sulfate	1900	TRUE	-0.182186	-0.031291	0.0331804	0.099871	0.047588	0.0158445	-0.0226069	5.21548	5.69606	0.196615	0.662553	0.531139	0.0291082	0.493252	2.20529e-14	5.1155e-11	0.00178394	7.14766e-05	0.917048	0.951802
188	5-dodecenoate (12:1n7)	1900	TRUE	0.461098	0.0305187	0.0219651	-0.743569	-0.0697091	-0.0023293	-0.00215112	-0.11331	-1.07539	0.000813358	0.662794	0.671019	3.33523e-62	0.303833	0.249975	0.522011	0.944563	0.442398	0.917048	0.971569
161	5-methylthioadenosine (MTA)	1900	TRUE	-1.61604	0.0304513	0.0216528	-0.066524	0.230901	0.0127846	0.0348834	12.299	-4.01234	7.31414e-32	0.66316	0.675105	0.136052	0.000650797	2.60203e-10	2.65559e-25	4.16897e-14	0.0041171	0.917048	0.971569
473	9,10-DiHOME	1900	TRUE	1.13364	0.0318312	0.0079661	-0.133417	-0.0384137	-0.00380535	-0.0321997	-1.53004	0.515095	3.23063e-15	0.663222	0.882743	0.00424424	0.587457	0.0719435	4.46822e-20	0.368641	0.724624	0.917048	0.983351
723	1-linoleoyl-GPE (18:2)*	1900	TRUE	0.357024	-0.0315063	0.124289	0.19754	-0.31869	0.00362762	-0.0211466	3.94157	-7.92772	0.0125218	0.664576	0.0206135	2.05294e-05	5.95825e-06	0.0844012	1.34155e-09	0.0198136	4.91362e-08	0.917504	0.545072
264	6-hydroxyindole sulfate	1900	TRUE	-0.248552	0.0317806	-0.0161049	0.227743	0.189283	0.00471401	-0.00342604	6.18226	-0.514651	0.0865651	0.666332	0.767443	1.29366e-06	0.00802047	0.0270525	0.332906	0.000315064	0.727033	0.918513	0.976775
855	docosahexaenoylcholine	1900	TRUE	0.158953	-0.0304004	0.055927	-0.0407937	-0.111977	0.0176524	-0.035202	-0.284226	-0.43483	0.257052	0.669723	0.28825	0.369904	0.104823	1.11987e-17	7.96341e-25	0.864007	0.760371	0.920718	0.880426
157	1-dihomo-linolenoyl-GPE (20:3n3 or 6)*	1900	TRUE	-0.673155	0.0312487	0.0657174	-0.0739078	0.09521	0.00273893	0.0186842	10.1735	-3.16534	3.10986e-06	0.670127	0.225352	0.114486	0.180288	0.196855	1.12342e-07	2.57799e-09	0.0309967	0.920718	0.839351
282	cyclo(pro-val)	1900	TRUE	-0.86441	-0.0311494	0.0287827	0.229348	0.00492772	0.00464339	0.0195212	7.50281	-4.38764	2.54541e-09	0.672659	0.597249	1.09673e-06	0.944989	0.0294798	3.47689e-08	1.23764e-05	0.00292824	0.920718	0.971569
25	S-adenosylhomocysteine (SAH)	1900	TRUE	-1.6347	0.0290014	0.0332173	0.649826	0.134505	0.013195	0.0258426	-2.12805	-1.34349	1.22051e-33	0.673033	0.513024	1.20858e-49	0.0433355	3.21281e-11	4.76756e-15	0.183544	0.32843	0.920718	0.949816
762	cysteine	1900	TRUE	-0.0293672	0.0310255	-0.0276297	0.136061	0.0261945	0.00808382	-0.014844	5.32888	-2.97066	0.840257	0.675204	0.613544	0.00399212	0.71495	0.000160796	2.96595e-05	0.00199423	0.0448871	0.920718	0.971569
866	X - 12462	1900	TRUE	0.118972	0.0306847	-0.0548212	0.149189	0.051953	-0.00198298	-0.00273722	-7.45017	-3.48874	0.412345	0.677385	0.314438	0.00153027	0.46711	0.352714	0.439479	1.43469e-05	0.0180437	0.920718	0.880426
703	1-palmitoyl-GPG (16:0)*	1900	TRUE	-0.663357	0.0305464	0.00575261	0.198988	0.183578	-0.000618396	0.0205226	3.88666	-0.631648	4.60713e-06	0.678021	0.915729	2.26617e-05	0.0100011	0.771419	6.23652e-09	0.023279	0.667793	0.920718	0.98551
759	glutamine conjugate of C7H12O2*	1900	TRUE	-0.998781	-0.0304127	0.0334842	-0.185886	-0.070025	0.0132852	0.0155642	2.26277	-1.63766	4.52838e-12	0.678436	0.536721	7.19004e-05	0.324381	3.84451e-10	9.87959e-06	0.185211	0.264385	0.920718	0.952189
267	1-pentadecanoyl-2-linoleoyl-GPC (15:0/18:2)*	1900	TRUE	-0.129204	-0.0296651	-0.0206139	-0.31725	-0.642289	0.00553813	0.0028951	3.84031	-6.60312	0.35953	0.678908	0.697053	4.05198e-12	2.191e-20	0.00755683	0.400049	0.0213564	4.09802e-06	0.920718	0.971569
317	N-delta-acetylornithine	1900	TRUE	0.309339	0.0296147	-0.0295321	0.161571	-0.0629039	0.0118132	-0.0327647	-3.16037	-5.81299	0.0283478	0.679599	0.577252	0.000415514	0.365121	1.23615e-08	1.75905e-21	0.0583556	5.06074e-05	0.920718	0.963162
521	3-hydroxymyristate	1900	TRUE	0.0609248	0.0308646	-0.0502344	-0.19533	0.0667154	0.00296196	-0.00451646	-3.68125	1.71121	0.678693	0.679651	0.363036	4.23835e-05	0.356805	0.170754	0.208133	0.0343991	0.252398	0.920718	0.916162
435	6-bromotryptophan	1900	TRUE	0.227821	-0.0302131	-0.0124732	0.32873	0.0212399	-0.00822506	0.00157562	4.61384	-6.36414	0.114447	0.680399	0.817973	2.19836e-12	0.764979	0.000106116	0.654531	0.00689801	1.43992e-05	0.920718	0.976775
455	perfluorooctanoate (PFOA)	1900	TRUE	-0.563682	-0.0279164	0.0380603	0.633644	0.161167	0.0189544	-0.0217056	-3.08732	-2.61436	2.60501e-05	0.681931	0.449529	4.16729e-48	0.0145826	6.68913e-22	3.18585e-11	0.0515757	0.0550196	0.920718	0.934338
716	1-palmitoyl-2-palmitoleoyl-GPC (16:0/16:1)*	1900	TRUE	-0.95368	0.0284398	-0.0440386	-0.359575	0.0568181	0.00357819	0.0324446	10.1166	-7.27008	4.58872e-12	0.684796	0.394935	8.96038e-16	0.402471	0.0775034	5.08713e-22	5.58009e-10	2.13054e-07	0.920718	0.919286
549	gamma-glutamylmethionine	1900	TRUE	-0.320112	0.0292135	0.0187257	0.519251	-0.0787489	0.00374493	-0.00178517	-0.891736	-0.486764	0.024744	0.686794	0.726496	2.98533e-29	0.261831	0.0739951	0.607774	0.597066	0.73697	0.920718	0.976775
823	isoursodeoxycholate	1900	TRUE	-0.346083	-0.029327	-0.0217936	0.082727	0.170229	-0.00695254	0.0229446	-10.4154	-7.5606	0.0157616	0.687256	0.685558	0.0752261	0.0158478	0.000970408	5.3436e-11	8.20933e-10	2.11934e-07	0.920718	0.971569
569	X - 11522	1900	TRUE	0.184035	0.0284432	-0.00291148	0.527436	-0.0257658	0.00740986	-0.0262506	-2.15504	-1.76672	0.186783	0.688067	0.955646	1.96575e-31	0.707323	0.00030002	1.178e-14	0.191389	0.212514	0.920718	0.991578
640	ornithine	1900	TRUE	-0.995676	0.0281093	0.0350227	0.520295	-0.0378939	0.0209606	-0.00761753	3.97852	-2.75441	5.56587e-13	0.688742	0.499392	3.4436e-31	0.577208	5.4558e-25	0.0237471	0.0148903	0.0497348	0.920718	0.949816
387	1-(1-enyl-palmitoyl)-2-linoleoyl-GPC (P-16:0/18:2)*	1900	TRUE	1.8283	0.0267821	-0.0289174	-0.111057	-0.536987	-0.00228636	-0.0568544	-2.20097	3.71829	1.95301e-43	0.690389	0.560519	0.00966353	1.65212e-16	0.239832	1.91571e-69	0.159735	0.00569822	0.920718	0.960277
782	2-myristoyl-GPC (14:0)*	1900	TRUE	-0.271452	0.0295455	0.00864651	0.0496007	-0.0362391	0.00416273	0.00154898	8.17481	-4.22723	0.0634823	0.691031	0.874914	0.295876	0.614772	0.0529124	0.664246	2.3212e-06	0.00447097	0.920718	0.983351
307	1-margaroyl-2-linoleoyl-GPC (17:0/18:2)*	1900	TRUE	0.380322	-0.0280598	0.0113752	-0.170266	-0.497752	0.0130579	-0.0308845	-6.61369	-4.217	0.00620661	0.691148	0.827447	0.000158874	3.4476e-13	1.65094e-10	8.30843e-20	5.77166e-05	0.00283631	0.920718	0.976775
423	X - 11308	1900	TRUE	0.340867	0.0269424	-0.054287	0.583448	0.199339	-0.0203981	0.0146527	-11.609	-0.946394	0.0108796	0.692059	0.28012	3.68862e-41	0.00248502	3.58356e-25	7.22615e-06	2.3075e-13	0.486738	0.920718	0.87768
110	glycerophosphorylcholine (GPC)	1900	TRUE	0.302036	-0.0289653	0.112626	0.230475	-0.186126	0.00562159	-0.0236476	1.92066	2.2785	0.0361693	0.692595	0.0374887	8.30538e-07	0.0087273	0.00799857	1.77713e-11	0.260203	0.120024	0.920718	0.63384
690	1-stearoyl-GPC (18:0)	1900	TRUE	0.276092	0.0278967	0.120999	0.318913	-0.294787	0.0135246	-0.0371371	3.22804	-0.204111	0.0470695	0.692998	0.0204768	1.54413e-12	1.65655e-05	3.69426e-11	6.80976e-28	0.049753	0.88518	0.920718	0.545072
318	3beta-hydroxy-5-cholestenoate	1900	TRUE	1.40337	0.0266954	-0.00822714	0.374431	-0.0255488	-0.000260563	-0.0547058	7.17197	4.15469	1.53693e-25	0.695813	0.870459	8.61176e-18	0.699281	0.895056	1.55192e-62	6.43777e-06	0.00235017	0.920718	0.981046
509	X - 23680	1900	TRUE	-1.24197	-0.0278637	0.0171513	0.505208	0.0688999	0.00561463	0.0276073	-7.88343	-1.38209	8.47079e-19	0.695908	0.744724	1.22568e-28	0.318403	0.00648229	7.2183e-16	2.03884e-06	0.332446	0.920718	0.976775
578	1-palmitoyl-2-oleoyl-GPI (16:0/18:1)*	1900	TRUE	-0.356595	-0.0283011	0.0761186	-0.274532	-0.423346	0.00401062	0.0106939	7.92889	-2.60317	0.0124591	0.69636	0.155464	3.02228e-09	1.67744e-09	0.0559337	0.00212901	2.65649e-06	0.0727403	0.920718	0.781914
637	1-arachidoyl-GPC (20:0)	1900	TRUE	1.38056	-0.0254996	0.0946677	0.19979	-0.435255	0.01034	-0.0683903	3.06452	0.59899	7.8225e-27	0.696704	0.0501833	1.71636e-06	6.4965e-12	4.67708e-08	3.92595e-105	0.0442317	0.647154	0.920718	0.653972
222	X - 24588	1900	TRUE	-1.63784	0.0263162	-0.0428754	0.748388	0.12127	0.00963201	0.0313804	-0.64332	-1.44141	1.15337e-34	0.697822	0.391934	4.88463e-67	0.0647351	9.01071e-07	5.20274e-22	0.683527	0.287716	0.920782	0.919286
481	X - 11261	1900	TRUE	-1.82094	-0.0267539	0.0510583	0.291077	0.24864	0.0092002	0.0439776	-12.2209	-4.5957	1.16221e-40	0.699502	0.318782	4.73555e-11	0.000212792	4.47215e-06	7.01775e-40	3.65082e-14	0.000917373	0.920782	0.889809
7	X - 24243	1900	TRUE	-0.000134781	-0.0284647	-0.077497	0.317829	0.0532094	-0.00127409	-0.0016271	-4.62958	-2.66216	0.99926	0.699835	0.155432	1.5402e-11	0.456865	0.550838	0.64618	0.00707665	0.0714484	0.920782	0.781914
314	N1-methyladenosine	1900	TRUE	-1.63538	0.0271682	0.0281359	0.282569	0.00851639	0.0153965	0.0274548	8.17025	-0.397412	2.552e-31	0.703551	0.593792	5.63403e-10	0.901993	9.04385e-14	1.14387e-15	8.87568e-07	0.780802	0.9228	0.971569
165	X - 16944	1900	TRUE	-0.73052	-0.0277421	0.00783191	0.0668513	0.192812	0.000639531	0.0234964	-11.2545	-3.68097	3.55037e-07	0.703596	0.884419	0.150908	0.00633535	0.761757	1.91238e-11	3.3714e-11	0.0116106	0.9228	0.983351
29	3-hydroxypyridine sulfate	1900	TRUE	-0.269001	0.0266691	-0.00689282	0.283746	-0.0631996	0.01828	-0.0257097	11.0362	-0.431513	0.0529783	0.705803	0.894948	3.13077e-10	0.35573	3.75245e-19	3.43687e-14	1.95275e-11	0.760096	0.9228	0.983351
80	X - 12906	1900	TRUE	-0.471117	0.0267487	0.0687676	0.216834	-0.041594	0.0224396	-0.0251961	6.33305	5.58433	0.000730009	0.705877	0.189144	1.6448e-06	0.544621	7.12927e-28	1.30983e-13	0.000124174	8.18645e-05	0.9228	0.798683
447	X - 21448	1900	TRUE	0.264926	0.0270424	-0.00412763	0.495958	0.019	0.00346578	-0.0222581	-1.86722	-1.34437	0.0608376	0.706519	0.938001	2.81315e-27	0.784765	0.095306	1.0761e-10	0.264141	0.349377	0.9228	0.987601
838	1-methylxanthine	1900	TRUE	0.053353	-0.0273797	0.0393256	0.192332	-0.059744	0.00470871	-0.0127224	10.317	-3.27553	0.712183	0.709493	0.468965	4.13665e-05	0.401359	0.0267894	0.000311085	1.64831e-09	0.0258774	0.924187	0.942136
42	sphingomyelin (d18:0/20:0, d16:0/22:0)*	1900	TRUE	-1.21953	-0.0268037	-0.0930713	-0.106465	-0.0929121	0.00302646	0.0411144	0.60104	-2.55067	7.34687e-18	0.709644	0.0801617	0.0205089	0.182723	0.146172	1.22707e-32	0.719897	0.0765081	0.924187	0.709714
634	X - 23590	1900	TRUE	-1.24086	-0.0264552	0.0164986	-0.227587	0.04973	0.00366392	0.0405859	4.59529	-1.80594	9.45591e-19	0.710705	0.754237	5.76883e-07	0.471657	0.0757965	2.0716e-32	0.00565488	0.205589	0.924226	0.976775
737	1-stearoyl-2-arachidonoyl-GPC (18:0/20:4)	1900	TRUE	-0.748135	0.0266864	-0.0567936	-0.0996578	0.31356	0.00596614	0.0165546	5.99761	7.49396	1.69749e-07	0.713566	0.290394	0.0317534	8.48525e-06	0.0045594	2.10249e-06	0.000395225	2.56126e-07	0.924331	0.880426
418	1-palmityl-2-linoleoyl-GPC (O-16:0/18:2)*	1900	TRUE	1.3547	0.0255833	0.00871013	0.0389979	-0.535713	-0.0023291	-0.0423823	-3.82114	1.10487	5.48145e-23	0.713725	0.865766	0.380985	2.18194e-15	0.248314	9.86276e-37	0.0186019	0.428331	0.924331	0.978217
16	X - 16570	1900	TRUE	-0.743425	-0.0267584	0.0533329	-0.204595	0.00491997	0.0109229	0.00993389	8.03624	-2.48916	2.25632e-07	0.713881	0.322651	1.12396e-05	0.944516	2.29879e-07	0.00457689	2.25172e-06	0.088179	0.924331	0.897813
532	cortolone glucuronide (1)	1900	TRUE	-2.67968	0.0236656	-0.0520339	0.319965	0.0560358	0.0118238	0.0711371	-6.23318	-3.16397	5.17468e-98	0.715016	0.277251	1.04373e-14	0.372109	2.86926e-10	1.09119e-115	3.61983e-05	0.0146704	0.924465	0.87768
542	O-sulfo-L-tyrosine	1900	TRUE	-0.949676	-0.0259476	0.03581	0.240832	-0.00128635	0.0175891	-6.1086e-05	8.65519	-2.57339	1.74792e-11	0.717658	0.499437	1.45866e-07	0.985235	2.40181e-17	0.985852	2.21456e-07	0.073007	0.925633	0.949816
81	tyrosine	1900	TRUE	-1.62315	0.0256463	-0.0723588	0.363184	-0.0442824	0.0102684	0.0358588	-2.76975	0.510175	4.48761e-31	0.718533	0.168744	1.2851e-15	0.520576	6.09829e-07	8.87173e-26	0.0945595	0.72002	0.925633	0.781914
411	isobutyrylglycine	1900	TRUE	0.183658	-0.0263212	-0.0496508	0.00247962	-0.0545697	0.00875966	-0.0210694	9.59968	-0.567312	0.202038	0.719018	0.358369	0.957655	0.441289	3.49402e-05	1.98551e-09	1.74433e-08	0.698271	0.925633	0.916162
496	X - 12680	1900	TRUE	-0.765739	0.026262	0.111648	0.155532	0.00934627	0.00832322	0.00961538	2.8415	3.56751	1.41288e-07	0.722431	0.0409766	0.000981948	0.896167	9.96973e-05	0.00674601	0.0987979	0.0158532	0.928498	0.63384
236	gamma-glutamyltryptophan	1900	TRUE	-1.21751	0.0255438	0.0423914	0.396969	0.00947437	0.00747054	0.0248445	3.44963	-3.10395	1.1615e-17	0.723904	0.427545	7.95528e-18	0.892406	0.000355599	8.25028e-13	0.0404682	0.031881	0.928498	0.934338
380	branched-chain fatty acid 18:0 (2)**	1900	TRUE	0.169881	0.0262179	-0.0222718	0.220933	-0.00950679	-0.00292103	-0.00393104	-0.418924	-1.01248	0.245541	0.724354	0.68516	3.23256e-06	0.894977	0.17444	0.270715	0.80877	0.495989	0.928498	0.971569
591	alpha-ketobutyrate	1900	TRUE	-0.69552	0.0256284	-0.0885033	0.0248944	0.15334	-0.00379457	0.0310992	-3.82677	-3.84956	1.37894e-06	0.726294	0.101826	0.59424	0.0305994	0.0732041	8.86446e-19	0.0247684	0.00857233	0.928498	0.72554
189	pyroglutamine*	1900	TRUE	-0.113488	-0.0208193	0.0296212	1.18477	-0.107902	0.00317697	-0.0171572	11.2872	2.55069	0.332461	0.726455	0.500535	1.4871e-213	0.0612299	0.0649917	1.90554e-09	3.75182e-16	0.0321337	0.928498	0.949816
513	1,5-anhydroglucitol (1,5-AG)	1900	TRUE	-0.0298583	0.0252024	0.0592017	0.395921	-0.336455	-0.00783211	0.0103027	1.47162	-1.22932	0.834172	0.728058	0.268972	1.15335e-17	1.64984e-06	0.00018764	0.00306683	0.383186	0.396493	0.928498	0.87385
872	carotene diol (2)	1900	TRUE	1.39895	-0.0229881	0.00211029	-0.146147	-0.307106	0.0108289	-0.0648658	-6.33509	0.248071	7.32209e-27	0.728621	0.965617	0.000549007	1.70878e-06	1.60953e-08	1.90173e-92	4.01356e-05	0.851521	0.928498	0.993822
413	eicosenedioate (C20:1-DC)*	1900	TRUE	0.66521	-0.0243278	-0.0352266	0.393425	0.0466776	-0.0190925	0.00401904	-10.3788	-0.857872	1.64685e-06	0.730184	0.499127	2.38197e-18	0.494524	8.30537e-21	0.23529	2.62589e-10	0.543198	0.928498	0.949816
735	bilirubin (Z,Z)	1900	TRUE	0.382689	0.0248596	-0.0787013	0.447015	-0.0264914	0.00121991	-0.0210239	-0.00789166	-1.15834	0.00705808	0.730571	0.140087	2.99004e-22	0.704804	0.55914	1.30663e-09	0.996254	0.422455	0.928498	0.775969
501	N-methylproline	1900	TRUE	-0.250894	0.0253402	-0.0322817	0.19468	-0.0324623	0.0102676	-0.0105884	-5.91894	-1.18154	0.0859684	0.73292	0.556301	4.00627e-05	0.651775	1.75858e-06	0.00297576	0.000618344	0.42636	0.928639	0.959573
296	hypoxanthine	1900	TRUE	-1.10597	0.0249187	0.0415969	0.157147	0.0179558	0.00673518	0.0255161	-3.93828	-0.318844	1.52623e-14	0.733311	0.441438	0.000761985	0.799912	0.0014562	3.65701e-13	0.0207307	0.827468	0.928639	0.934338
751	guaiacol sulfate	1900	TRUE	-0.441263	-0.0242489	0.0629602	0.333669	0.0149868	0.0186257	-0.0211838	2.25983	-1.8235	0.00173642	0.734862	0.234025	2.86516e-13	0.828925	2.43535e-19	7.14045e-10	0.17524	0.202956	0.928639	0.841623
671	X - 21383	1900	TRUE	-0.501176	0.0246382	0.0580138	0.10955	0.0805383	-0.00798211	0.0289649	3.48367	-1.62454	0.000511042	0.736764	0.284085	0.0192081	0.256651	0.000167053	1.84596e-16	0.0412183	0.267854	0.928639	0.880426
66	glutamine conjugate of C6H10O2 (2)*	1900	TRUE	-1.03285	-0.0243725	0.0759398	-0.232795	-0.0693773	0.0140754	0.0158411	-1.60004	-2.56086	6.79326e-13	0.738718	0.159562	6.00275e-07	0.326993	2.76799e-11	6.30281e-06	0.346963	0.0797613	0.928639	0.781914
8	X - 11442	1900	TRUE	0.284522	-0.0239288	0.029976	0.459326	0.00622773	0.00417801	-0.0236265	-4.02924	-0.307194	0.0442394	0.739186	0.572446	1.35147e-23	0.928722	0.0445031	7.51145e-12	0.016049	0.830803	0.928639	0.961962
840	N-acetylglutamine	1900	TRUE	-0.63486	0.0238789	0.0450938	0.132809	0.00996484	0.0165598	-0.00845205	10.3771	9.84645	7.55864e-06	0.740364	0.397044	0.0038859	0.886482	1.96832e-15	0.014556	6.21125e-10	8.43413e-12	0.928639	0.919286
139	arachidonoylcholine	1900	TRUE	-0.00683732	-0.0242943	0.0233168	-0.0137194	-0.0284208	0.0105369	-0.0176939	5.74912	1.38049	0.962304	0.741064	0.66776	0.770026	0.689835	7.27094e-07	5.35098e-07	0.000783349	0.347882	0.928639	0.971569
170	X - 24556	1900	TRUE	-0.186345	-0.023725	0.0541894	0.326034	-0.0837447	0.0158462	-0.024753	0.932161	-0.335639	0.187665	0.741347	0.307577	1.19452e-12	0.229061	2.53022e-14	7.30943e-13	0.577528	0.81542	0.928639	0.880426
478	behenoyl dihydrosphingomyelin (d18:0/22:0)*	1900	TRUE	-1.31932	-0.0234715	-0.088073	-0.00711368	-0.0681485	0.000656365	0.0474085	-2.33615	-3.31087	5.00736e-21	0.741869	0.0943851	0.875725	0.323505	0.750195	1.13047e-43	0.159115	0.0201934	0.928639	0.720053
41	1-linolenoyl-GPC (18:3)*	1900	TRUE	0.506051	0.0238707	0.0868651	0.21218	-0.160304	0.00436122	-0.0286968	8.65111	-1.66178	0.000391673	0.742082	0.105063	4.58901e-06	0.0225152	0.0376789	1.70334e-16	3.01264e-07	0.252066	0.928639	0.72554
95	5alpha-pregnan-3beta,20alpha-diol monosulfate (2)	1900	TRUE	1.71364	0.0225729	-0.000406657	-0.468392	-0.0910488	-0.0217404	-0.0173074	5.07418	0.881472	1.82422e-35	0.74734	0.993733	1.15844e-25	0.179777	7.79464e-27	2.67206e-07	0.00186915	0.529415	0.932356	0.995254
498	X - 18901	1900	TRUE	1.00433	-0.0227386	0.0097442	-0.22903	-0.0789001	0.00568674	-0.0421127	9.67325	-2.46099	5.33801e-13	0.747839	0.852089	3.91769e-07	0.249476	0.00544991	2.5229e-35	4.25201e-09	0.0819523	0.932356	0.976775
876	3-methyl catechol sulfate (1)	1900	TRUE	-0.575247	0.0232267	-0.0186342	0.381748	0.0558368	0.0121021	-0.00586782	6.70182	-1.67784	5.32482e-05	0.748174	0.727398	1.3794e-16	0.425585	7.37403e-09	0.0911194	6.92975e-05	0.24629	0.932356	0.976775
819	X - 13431	1900	TRUE	-0.241679	0.0227098	0.0010239	0.443354	0.0278224	0.00828919	-0.0120172	8.67193	1.50308	0.0887632	0.752996	0.98468	6.29405e-22	0.690622	7.17637e-05	0.000522796	2.45384e-07	0.29776	0.937062	0.995254
4	13-HODE + 9-HODE	1900	TRUE	0.737506	0.0227645	0.00494419	-0.368335	-0.0591829	-0.00158774	-0.0184798	1.33037	0.930754	3.02616e-07	0.755737	0.927143	3.13576e-15	0.403765	0.453271	1.43744e-07	0.434906	0.524873	0.939168	0.987601
164	N-acetylputrescine	1900	TRUE	-0.658761	0.0224214	-0.0106893	-0.191323	0.254173	0.0120775	0.00414434	-1.78002	-1.13537	5.05778e-06	0.759945	0.843711	4.41489e-05	0.000349066	1.27663e-08	0.239406	0.297474	0.439224	0.942324	0.976775
691	sphingomyelin (d17:1/16:0, d18:1/15:0, d16:1/17:0)*	1900	TRUE	-1.12218	-0.0219481	-0.0261551	-0.102772	-0.4803	0.0165773	0.0156367	6.76161	1.07024	3.52164e-15	0.761957	0.625169	0.0262795	7.74293e-12	2.60984e-15	6.94376e-06	6.12207e-05	0.460257	0.942324	0.971569
310	1-palmityl-2-stearoyl-GPC (O-16:0/18:0)*	1900	TRUE	0.16428	-0.0222248	-0.0633539	-0.132141	-0.52384	0.00477937	-0.00916198	6.23513	0.756936	0.256055	0.762389	0.243439	0.00485931	1.88279e-13	0.0246137	0.00942286	0.000269349	0.606703	0.942324	0.85538
715	allantoin	1900	TRUE	-0.725857	-0.0219442	0.0177841	0.474836	-0.0866177	0.0105771	0.00151621	3.60122	-1.62655	4.37529e-07	0.763777	0.741687	2.25587e-24	0.220725	5.52996e-07	0.665351	0.0341553	0.26545	0.942324	0.976775
742	X - 11441	1900	TRUE	0.29098	-0.0215428	0.0267942	0.470027	0.00613018	0.00393244	-0.0235652	-4.06711	-0.0234366	0.03938	0.76408	0.613415	1.08228e-24	0.929744	0.0582632	7.98674e-12	0.0149484	0.986977	0.942324	0.971569
488	1-palmitoyl-2-docosahexaenoyl-GPC (16:0/22:6)	1900	TRUE	0.367729	-0.0214484	-0.0417152	-0.0623145	-0.0165699	0.015088	-0.0372935	-5.4761	0.359424	0.00907407	0.764587	0.430551	0.172879	0.811234	3.298e-13	2.07456e-27	0.00102399	0.80191	0.942324	0.934338
253	beta-alanine	1900	TRUE	-0.655702	-0.0210037	0.00903292	0.579551	-0.040076	-0.00108928	0.0177103	-0.935676	-2.26469	3.28495e-06	0.769349	0.864483	8.0984e-37	0.563541	0.599135	2.59999e-07	0.574768	0.113972	0.944978	0.978217
245	pantothenate	1900	TRUE	-0.992336	-0.0209565	0.0166838	0.155028	0.174756	0.0207159	-0.00313686	3.8424	-3.59596	1.9747e-12	0.769989	0.752734	0.000702604	0.0118319	1.67497e-23	0.361938	0.0213041	0.012135	0.944978	0.976775
354	5-hydroxylysine	1900	TRUE	-1.73604	0.0194888	-0.0193563	-0.303535	0.0447594	0.00848601	0.0512019	13.1721	-2.53053	1.77167e-39	0.771503	0.696268	1.38137e-12	0.491104	1.23709e-05	7.05069e-57	3.44765e-17	0.0594141	0.944978	0.971569
104	3-(3-amino-3-carboxypropyl)uridine*	1900	TRUE	-2.10411	-0.0200909	0.0912904	0.387605	0.0286189	0.0189527	0.0362424	4.85388	-2.0796	8.51883e-54	0.771713	0.0743892	1.80226e-18	0.669627	3.06221e-21	1.12314e-27	0.00260733	0.133264	0.944978	0.709071
828	oleoylcarnitine (C18:1)	1900	TRUE	-0.73889	0.0205939	0.0709693	0.321118	-0.113919	0.0230622	-0.017306	-1.06194	-3.96434	1.32224e-07	0.772325	0.177194	1.57316e-12	0.0984742	4.08469e-29	4.08793e-07	0.52165	0.00536207	0.944978	0.797819
559	methionine	1900	TRUE	-0.119374	0.0202202	-0.0463677	0.678588	0.0367643	-0.00129255	-0.0024894	-4.89374	3.54028	0.386941	0.773068	0.370819	6.41914e-52	0.588323	0.524018	0.459586	0.00272188	0.0116014	0.944978	0.916162
773	ceramide (d18:1/14:0, d16:1/16:0)*	1900	TRUE	-1.42754	-0.0203523	0.0539714	-0.0223985	-0.102518	0.0127189	0.0294361	6.41746	-4.61453	9.09465e-24	0.777971	0.311556	0.626869	0.142579	1.12326e-09	1.97916e-17	0.0001342	0.00139337	0.949676	0.880426
630	pregnenolone sulfate	1900	TRUE	2.04141	0.0178028	-0.0815486	0.541428	-0.234685	-0.0321276	-0.0234699	1.03469	2.96284	1.57839e-59	0.78008	0.083457	2.21921e-40	0.000144786	6.11443e-68	1.75075e-14	0.48581	0.0201754	0.950954	0.709714
548	16-hydroxypalmitate	1900	TRUE	0.139763	0.0206549	0.00902819	-0.247426	-0.00471929	0.00157834	-0.00441622	-0.842203	1.33458	0.342143	0.782363	0.870193	2.17084e-07	0.948048	0.465606	0.218576	0.628544	0.37223	0.951088	0.981046
69	sphingomyelin (d18:0/18:0, d19:0/17:0)*	1900	TRUE	-1.52616	0.0192662	-0.0730115	-0.137089	0.0365601	0.00237727	0.0526599	-1.41094	-2.02966	1.86139e-28	0.783431	0.158642	0.00218525	0.590274	0.24109	3.38038e-55	0.387304	0.147749	0.951088	0.781914
653	1-linolenoyl-GPE (18:3)*	1900	TRUE	0.100377	-0.0203033	0.0943904	0.0699316	-0.00202117	0.000575172	-0.00655918	8.61023	-2.84397	0.491807	0.784386	0.0851583	0.139844	0.977568	0.788761	0.0655843	6.24288e-07	0.0553696	0.951088	0.709714
409	2-oleoyl-GPE (18:1)*	1900	TRUE	0.525661	0.0200938	0.0696814	0.163909	0.125941	-0.000156899	-0.0222581	8.12931	-0.741813	0.000278361	0.784555	0.199463	0.000476438	0.0769042	0.941179	2.822e-10	2.02978e-06	0.613867	0.951088	0.798683
551	1,7-dimethylurate	1900	TRUE	-0.798703	-0.0200276	-0.0399558	0.0412381	-0.0230681	0.0105007	0.0102889	7.53508	-4.49615	3.46799e-08	0.785497	0.462428	0.379982	0.746223	8.11977e-07	0.00358486	1.09273e-05	0.00225423	0.951088	0.940761
844	1-palmitoylglycerol (16:0)	1900	TRUE	-0.190428	0.0198787	-0.00146152	-0.0601699	-0.0509987	-0.00541513	0.0170557	-5.98795	-1.8871	0.189735	0.787649	0.978617	0.201495	0.47559	0.0112014	1.4778e-06	0.000492255	0.201125	0.951115	0.995254
812	mannitol/sorbitol	1900	TRUE	-1.25652	-0.0192704	0.0129882	0.102119	0.216173	0.017711	0.0117788	3.78415	0.342196	6.61233e-19	0.78869	0.806863	0.0260798	0.00191046	1.6747e-17	0.000643743	0.023793	0.811938	0.951115	0.976775
340	1-palmitoyl-2-oleoyl-GPC (16:0/18:1)	1900	TRUE	-0.116366	-0.0194281	-0.0236256	-0.115172	-0.131685	0.0118618	-0.0137391	6.96304	-3.96231	0.416612	0.789574	0.660517	0.0131984	0.0618537	1.782e-08	8.45412e-05	3.99258e-05	0.00651085	0.951115	0.971569
600	1-palmitoyl-GPE (16:0)	1900	TRUE	0.876008	0.018996	0.0997515	-0.0117266	0.0599247	0.0066832	-0.0439195	5.44443	-3.43856	4.14602e-10	0.789765	0.0581187	0.796527	0.385244	0.00118565	9.71722e-38	0.00103074	0.0158351	0.951115	0.680403
665	X - 21258	1900	TRUE	0.606477	-0.0189425	-0.0279313	0.263815	0.0651605	0.00777109	-0.0386049	1.61839	6.09861	1.63087e-05	0.791086	0.597056	7.48217e-09	0.346849	0.000172355	2.42736e-29	0.33102	2.01129e-05	0.951427	0.971569
563	xanthine	1900	TRUE	-1.64666	0.0181866	0.0386557	0.425996	0.104636	0.00714299	0.040195	-9.13558	-2.75441	2.17793e-33	0.793578	0.451619	7.83457e-22	0.120135	0.00038169	2.01469e-33	1.64761e-08	0.0475685	0.953145	0.934338
244	N4-acetylcytidine	1900	TRUE	-1.19494	0.0181099	0.081194	0.0889975	0.255382	0.00357442	0.0329468	16.5145	-2.01189	4.79573e-18	0.796253	0.117187	0.046831	0.000170683	0.0781476	1.30753e-22	4.85379e-24	0.151576	0.955077	0.74401
535	1-oleoyl-GPI (18:1)	1900	TRUE	-0.00254834	-0.0185839	0.0013435	0.023611	-0.313708	0.013877	-0.0228122	1.32981	2.7982	0.985879	0.799521	0.980176	0.613211	9.60734e-06	5.55865e-11	8.3604e-11	0.435076	0.0559137	0.955369	0.995254
56	X - 23782	1900	TRUE	0.393397	0.0181657	-0.0109678	-0.400503	-0.116645	0.0118231	-0.027911	-6.87413	-0.150164	0.00519469	0.799548	0.835624	1.776e-18	0.0923168	1.11178e-08	4.39096e-16	3.67347e-05	0.916425	0.955369	0.976775
884	X - 11381	1900	TRUE	-1.68017	0.0179334	-0.0218042	0.493201	0.0924341	0.0130857	0.0304554	-2.27255	-1.85651	1.32204e-33	0.799695	0.676289	8.07076e-28	0.17696	1.55511e-10	2.8005e-19	0.167268	0.189119	0.955369	0.971569
289	stearoylcarnitine (C18)	1900	TRUE	-0.435442	0.0171179	-0.00246845	0.595391	-0.132862	0.0206371	-0.0270769	-0.542408	-3.31712	0.0012966	0.803495	0.961269	7.06362e-42	0.046177	3.42786e-25	2.42901e-16	0.734883	0.0159303	0.956631	0.992278
457	2-linoleoyl-GPE (18:2)*	1900	TRUE	0.181119	-0.0182571	0.109512	0.151291	-0.231472	0.00375463	-0.0149012	3.46663	-5.83621	0.210134	0.803694	0.0436025	0.00125126	0.00114021	0.0772335	2.3777e-05	0.0426475	7.11669e-05	0.956631	0.63384
251	spermidine	1900	TRUE	0.100278	-0.0183606	-0.0146094	0.30981	-0.0946018	-0.00355485	-0.00077865	-2.5258	-1.1242	0.491163	0.804104	0.789385	5.49812e-11	0.18705	0.0969191	0.826558	0.142776	0.447708	0.956631	0.976775
201	2-palmitoyl-GPC (16:0)*	1900	TRUE	0.383643	0.0179343	0.0696445	0.25813	-0.0662476	0.00653827	-0.0289695	6.12239	-3.15101	0.00728369	0.805024	0.194511	2.60527e-08	0.346529	0.00186639	9.8946e-17	0.000295315	0.0301427	0.956631	0.798683
94	2,3-dihydroxy-5-methylthio-4-pentenoate (DMTPA)*	1900	TRUE	-2.84019	-0.0151996	0.0923898	0.67736	0.0745543	0.0276607	0.043334	8.2999	-1.8295	1.42872e-119	0.806589	0.0440008	1.67908e-65	0.215068	1.61723e-53	6.75772e-48	9.35273e-09	0.140691	0.956631	0.63384
348	N2,N2-dimethylguanosine	1900	TRUE	-2.29957	-0.0165071	0.0870052	0.102944	0.00657656	0.0192657	0.0466765	3.34613	0.372592	1.63791e-64	0.810679	0.0874865	0.0192632	0.921514	4.28521e-22	3.29357e-45	0.0370139	0.786922	0.956631	0.709714
654	3,4-methyleneheptanoate	1900	TRUE	-0.0632436	-0.0177841	0.0557786	0.0266765	0.00382256	-0.00453899	0.00963816	-7.24242	-3.30398	0.665907	0.811177	0.310528	0.574509	0.957722	0.0350584	0.00699472	2.93118e-05	0.0264932	0.956631	0.880426
795	taurolithocholate 3-sulfate	1900	TRUE	0.70261	0.0174433	-0.0159203	-0.0327016	0.0516263	-0.000149591	-0.0247209	9.8444	4.35618	1.04172e-06	0.81144	0.768234	0.483507	0.466045	0.943621	1.88238e-12	7.34689e-09	0.00289691	0.956631	0.976775
294	5alpha-androstan-3beta,17alpha-diol disulfate	1900	TRUE	0.293897	0.0166752	0.0490796	0.638878	-0.0276508	0.00195362	-0.0229763	4.58187	-3.71139	0.0327626	0.811604	0.342382	1.98845e-46	0.68325	0.334413	7.84453e-12	0.00490863	0.00799813	0.956631	0.902068
328	beta-cryptoxanthin	1900	TRUE	1.76768	0.0157375	-0.0224317	-0.0714652	-0.192609	0.00201794	-0.0639532	-12.3031	1.06181	4.65602e-42	0.811838	0.646071	0.0903487	0.00263138	0.291373	2.60314e-90	1.3148e-15	0.422	0.956631	0.971569
506	2-oleoyl-GPC (18:1)*	1900	TRUE	0.863525	0.0161011	0.0550078	0.232909	-0.0848495	0.0126961	-0.0560763	8.97367	-1.34383	1.01102e-10	0.812496	0.272738	7.63595e-08	0.196884	1.01069e-10	2.27149e-66	1.36155e-08	0.322302	0.956631	0.87385
590	erythritol	1900	TRUE	-0.581896	-0.0173872	0.0402983	0.0421981	0.0972402	0.00946296	0.00307031	4.17979	-1.03072	7.36516e-05	0.815703	0.46472	0.375521	0.178406	1.16138e-05	0.391257	0.0161063	0.489735	0.958607	0.940761
234	sphingomyelin (d18:1/14:0, d16:1/16:0)*	1900	TRUE	-1.35448	-0.0164162	-0.0328751	-0.23182	-0.465488	0.0191195	0.0211153	8.34286	-1.6419	2.38189e-22	0.816613	0.52966	2.89193e-07	1.13334e-11	1.00098e-20	5.18205e-10	4.15117e-07	0.246239	0.958607	0.951802
239	1-oleoyl-2-docosahexaenoyl-GPC (18:1/22:6)*	1900	TRUE	0.962869	0.0153685	0.0623962	-0.272681	0.0640765	0.0175084	-0.0612308	-1.35926	0.241716	2.37289e-13	0.818027	0.206139	1.60086e-10	0.32201	1.29945e-19	2.75949e-81	0.38211	0.856438	0.958607	0.798683
101	indolelactate	1900	TRUE	0.200755	0.0156984	0.0328264	0.81981	-0.00959441	-0.00496026	-0.0102794	5.80582	0.00874152	0.135761	0.818453	0.515958	1.1244e-78	0.88485	0.0121778	0.00174291	0.000266315	0.994902	0.958607	0.949816
660	kynurenate	1900	TRUE	-1.42937	-0.0158451	-0.0101259	0.626874	-0.0986226	0.00670712	0.0315822	4.6847	-1.82192	2.12857e-25	0.820292	0.844238	5.05302e-45	0.144375	0.000887919	4.02572e-21	0.00391785	0.191609	0.959438	0.976775
480	nonanoylcarnitine (C9)	1900	TRUE	-0.140572	-0.0166835	0.0357061	0.155328	0.0922401	0.00672785	-0.00904648	-2.02885	2.47967	0.337048	0.822605	0.516088	0.00107536	0.200671	0.00177746	0.0113302	0.241603	0.0957423	0.959438	0.949816
388	X - 15666	1900	TRUE	0.890864	0.0162276	-0.0410473	0.0552624	-0.128388	-0.00471608	-0.023632	4.03746	1.53498	8.47914e-10	0.825933	0.45153	0.240682	0.0724564	0.0271588	2.53396e-11	0.0187692	0.298357	0.959438	0.934338
468	cis-4-decenoylcarnitine (C10:1)	1900	TRUE	-0.403317	0.0161741	0.0248496	0.135251	-0.0226338	0.00650759	0.00166099	-9.80482	1.53889	0.00550614	0.826618	0.648781	0.00411102	0.751668	0.00231672	0.639376	1.17664e-08	0.29747	0.959438	0.971569
697	phosphate	1900	TRUE	0.317188	0.0160597	0.0575282	-0.239727	-0.00887166	0.006295	-0.0194834	1.68122	-0.658431	0.0282645	0.827006	0.28937	3.20983e-07	0.900814	0.00306605	3.33405e-08	0.325789	0.654201	0.959438	0.880426
683	X - 16087	1900	TRUE	-1.86925	0.0151483	-0.00679254	0.300147	0.228131	0.0230702	0.0219068	1.52504	-3.87543	1.5101e-42	0.827427	0.894749	1.31522e-11	0.000700701	1.73818e-30	5.12641e-11	0.345868	0.00530058	0.959438	0.983351
494	linoleoylcarnitine (C18:2)*	1900	TRUE	-0.531643	-0.015047	0.0882181	0.677471	-0.118189	0.0143281	-0.0145001	-7.75681	-3.04502	9.7891e-05	0.828238	0.0851572	7.26746e-53	0.0785269	9.25438e-13	1.32952e-05	1.55733e-06	0.0281669	0.959438	0.709714
421	S-1-pyrroline-5-carboxylate	1900	TRUE	-0.133575	-0.016148	-0.0907727	0.117689	0.0146914	0.00113984	0.00167125	1.535	4.82878	0.364672	0.829271	0.100899	0.0138136	0.839501	0.598796	0.642013	0.378648	0.00126584	0.959438	0.72554
271	2-aminophenol sulfate	1900	TRUE	0.350453	-0.0158597	-0.0100492	0.240202	0.109277	0.000136326	-0.0164643	5.04342	0.703608	0.0161023	0.830311	0.854191	3.68083e-07	0.127418	0.94923	3.58262e-06	0.00342261	0.634575	0.959438	0.976775
748	X - 12822	1900	TRUE	-0.679761	0.0154259	-0.00654741	0.564657	-0.0112376	0.00416032	0.0096765	-5.10894	-4.33214	1.63676e-06	0.830502	0.902137	1.23133e-34	0.872105	0.0459868	0.00515684	0.00232746	0.00265325	0.959438	0.983351
268	X - 18921	1900	TRUE	0.0173323	0.0157764	0.0373991	0.210825	-0.0333999	-0.0039352	0.00338478	-8.03977	-3.13397	0.905387	0.831417	0.494606	8.31945e-06	0.641732	0.0664328	0.341391	3.16868e-06	0.0345022	0.959438	0.949816
460	X - 21736	1900	TRUE	-1.50634	0.0152218	-0.0225505	-0.0614388	0.159711	0.0161542	0.0263033	-0.420105	-2.77963	2.44915e-26	0.832781	0.672059	0.181859	0.0221984	9.54978e-15	2.96342e-14	0.802376	0.0539228	0.959438	0.971569
173	1-stearoyl-2-docosahexaenoyl-GPC (18:0/22:6)	1900	TRUE	-0.606824	-0.0150045	-0.0145271	0.0119558	0.214966	0.0212016	-0.015508	-8.39247	2.83863	1.7381e-05	0.83443	0.784171	0.79415	0.00199133	1.80434e-24	6.78819e-06	5.12878e-07	0.0480522	0.959438	0.976775
657	nervonoylcarnitine (C24:1)*	1900	TRUE	-0.304708	0.0144506	0.0132009	0.381134	-0.172708	0.0198261	-0.0273731	-2.19831	-7.47108	0.0277001	0.837229	0.799501	2.09133e-17	0.011252	1.98102e-22	5.21637e-16	0.179499	1.0971e-07	0.959438	0.976775
536	eicosapentaenoate (EPA; 20:5n3)	1900	TRUE	-0.130156	0.0144148	0.0112418	-0.0299823	0.18923	0.0188888	-0.0284017	0.123948	1.08049	0.357419	0.841048	0.832356	0.51343	0.0065686	1.04679e-19	1.85118e-16	0.940957	0.452335	0.959438	0.976775
357	X - 24699	1900	TRUE	-1.24056	-0.0125067	0.0677346	0.91873	-0.142925	0.0228115	-0.00738311	7.01153	2.83648	4.25446e-23	0.844338	0.1501	4.74079e-113	0.0205351	3.39867e-35	0.0157572	2.26972e-06	0.0260008	0.959438	0.781914
370	paraxanthine	1900	TRUE	-0.407601	-0.0144033	-0.0143188	0.1212	-0.0364791	0.00619463	0.00257653	2.90763	-4.98134	0.00552874	0.847024	0.795203	0.0109853	0.613975	0.00413139	0.472224	0.0943909	0.00085154	0.959438	0.976775
229	deoxycarnitine	1900	TRUE	-0.578317	-0.0124703	-0.000468981	1.02068	-0.166446	0.00763511	-0.0053702	-1.24709	-0.73138	6.49174e-06	0.848254	0.992229	6.18116e-133	0.00837389	5.13188e-05	0.0860753	0.411149	0.574775	0.959438	0.995254
616	3-formylindole	1900	TRUE	0.658631	0.0136517	-0.0357269	0.530892	0.00801761	-0.0052311	-0.0216938	6.71869	-3.01586	2.72525e-06	0.848288	0.498043	2.16819e-31	0.907662	0.0112822	2.41176e-10	5.25984e-05	0.0346205	0.959438	0.949816
814	X - 21829	1900	TRUE	-1.47451	0.0137758	0.0102968	0.108586	0.148788	0.0135359	0.0271155	-1.22486	-2.77559	5.25333e-25	0.849412	0.847687	0.0190467	0.034254	1.12835e-10	6.97142e-15	0.468402	0.0558161	0.959438	0.976775
279	adenosine	1900	TRUE	0.167852	0.0141435	-0.0165423	-0.0552027	-0.0363347	-0.00458504	0.00317132	-4.39886	0.127593	0.25227	0.849451	0.76382	0.24578	0.614667	0.033418	0.375295	0.0112244	0.931779	0.959438	0.976775
107	X - 21339	1900	TRUE	-0.131159	0.013145	-0.062771	0.318247	0.200577	-0.0179479	0.0308086	-10.386	-0.538476	0.341111	0.851085	0.225018	1.07516e-12	0.00310352	7.98273e-19	4.9267e-20	1.87986e-10	0.700636	0.959438	0.839351
564	1-linoleoyl-GPI (18:2)*	1900	TRUE	-0.630159	-0.0136878	-0.0137992	-0.100323	-0.347568	0.0103854	0.00765341	-3.87717	-1.05304	1.44587e-05	0.852948	0.800343	0.0333103	1.17986e-06	1.16659e-06	0.0308567	0.0241305	0.475912	0.959438	0.976775
20	X - 11530	1900	TRUE	0.304022	0.0129787	0.000771712	0.543396	-0.0572483	0.00415918	-0.024992	-3.35845	-2.06921	0.0294449	0.854868	0.988256	3.66671e-33	0.404893	0.0427532	2.18582e-13	0.0420652	0.144879	0.959438	0.995254
709	X - 17357	1900	TRUE	-1.88074	0.0127116	-0.0449686	0.531776	0.0460398	0.0146205	0.0350773	-2.25589	-3.67254	8.41828e-43	0.855282	0.382555	6.27046e-33	0.495279	4.14026e-13	1.0271e-25	0.16448	0.0084331	0.959438	0.919286
774	ethyl alpha-glucopyranoside	1900	TRUE	0.275094	0.0134302	-0.00176731	0.252837	0.0984657	0.000234682	-0.0145119	6.83032	0.210489	0.0577288	0.855342	0.974099	7.58377e-08	0.167632	0.912318	4.07084e-05	6.82804e-05	0.886416	0.959438	0.995254
45	X - 19141	1900	TRUE	-0.225503	-0.0127559	0.0933355	0.215247	-0.213722	0.0066218	-0.00648581	23.0885	2.04973	0.103727	0.856289	0.07291	1.68901e-06	0.00173347	0.00115565	0.0550958	5.12194e-45	0.145722	0.959438	0.709071
820	(N(1) + N(8))-acetylspermidine	1900	TRUE	-0.436602	0.0133605	0.137182	0.367319	-0.0649644	0.00648025	-0.00149988	2.44604	-0.663967	0.00264308	0.856344	0.0118816	6.33306e-15	0.363493	0.0024048	0.672047	0.154591	0.652885	0.959438	0.545072
426	stachydrine	1900	TRUE	0.0287487	-0.0131286	-0.0879728	0.193712	-0.0161348	0.0107734	-0.0209614	-3.85198	-1.08188	0.84209	0.857924	0.104487	3.50282e-05	0.820324	3.8176e-07	2.61848e-09	0.0240752	0.460823	0.959438	0.72554
90	X - 16946	1900	TRUE	0.212299	0.0128063	0.00962911	0.485483	0.0158158	0.00502624	-0.0229555	-1.79119	-1.41616	0.132368	0.858238	0.855768	2.73383e-26	0.819857	0.015384	2.56761e-11	0.283266	0.323424	0.959438	0.976775
369	sphingomyelin (d18:1/20:2, d18:2/20:1, d16:1/22:2)*	1900	TRUE	-1.07151	0.0120623	-0.0129802	-0.557013	-0.208758	0.00187494	0.0436427	0.464022	0.0831147	1.72028e-15	0.860041	0.79734	2.89747e-37	0.00163112	0.343459	2.68107e-40	0.770802	0.951568	0.959438	0.976775
11	sphingomyelin (d18:1/18:1, d18:2/18:0)	1900	TRUE	-1.55833	-0.0119267	0.00957286	-0.388471	-0.140233	0.0101699	0.0443092	-6.04276	2.0648	2.79854e-30	0.863274	0.851608	1.53261e-18	0.036589	3.85999e-07	1.61346e-40	0.000178664	0.13611	0.959438	0.976775
309	sphingomyelin (d17:2/16:0, d18:2/15:0)*	1900	TRUE	-1.97715	-0.0112876	-0.0237355	-0.533193	-0.366982	0.0236798	0.0391704	4.25742	-0.308781	1.08065e-52	0.863734	0.625254	5.87973e-37	8.39613e-09	1.48752e-35	2.42221e-35	0.00543187	0.814437	0.959438	0.971569
470	X - 17653	1900	TRUE	0.603883	0.0121795	-0.0366203	0.434886	0.198256	-0.0158563	-0.0006748	-9.32956	-0.78449	1.58039e-05	0.863964	0.485685	9.34162e-22	0.00398761	1.2581e-14	0.843252	1.73251e-08	0.581159	0.959438	0.949816
639	gamma-glutamylcitrulline*	1900	TRUE	0.0423494	0.0123306	0.0500534	-0.0415189	-0.238681	0.0141431	-0.0246535	9.83816	-2.04612	0.765411	0.864263	0.347646	0.367181	0.000635189	1.22172e-11	1.08063e-12	4.67906e-09	0.156148	0.959438	0.905498
618	1-eicosapentaenoyl-GPC (20:5)*	1900	TRUE	-0.180479	-0.0119861	0.0102872	0.256091	0.121907	0.0198022	-0.0317232	5.94315	1.75004	0.193073	0.864942	0.843385	1.24762e-08	0.0741205	2.65408e-22	6.77611e-21	0.000292106	0.214427	0.959438	0.976775
176	5,6-dihydrothymine	1900	TRUE	-0.933429	0.0124587	0.00336282	0.266606	-0.156638	0.00728177	0.0178285	2.57361	-1.76354	1.13805e-10	0.865537	0.950677	1.37349e-08	0.027963	0.000624034	4.47536e-07	0.133009	0.230818	0.959438	0.990096
543	4-hydroxychlorothalonil	1900	TRUE	0.0998443	0.0125395	-0.1078	-0.00262757	0.0806036	0.00566678	-0.0125301	2.88965	-1.34954	0.493261	0.86555	0.0488456	0.955675	0.261202	0.00817359	0.000424661	0.0937793	0.362316	0.959438	0.653219
74	1-myristoyl-2-linoleoyl-GPC (14:0/18:2)*	1900	TRUE	-0.461497	-0.0120576	-0.00711226	-0.404791	-0.354204	-0.000305368	0.0241554	1.35981	-7.8506	0.00105307	0.866254	0.893048	8.16796e-19	3.26406e-07	0.882789	2.09173e-12	0.414629	4.20697e-08	0.959438	0.983351
163	X - 11787	1900	TRUE	-0.832508	-0.0117242	0.0437626	0.521533	-0.0522417	0.0165392	-0.00558216	-3.82334	-4.51906	3.3645e-09	0.86985	0.407826	3.38429e-30	0.45102	1.35422e-15	0.104151	0.0217378	0.00159254	0.959438	0.926119
726	eicosanedioate (C20-DC)	1900	TRUE	0.830934	0.0119866	-0.00282158	0.226199	-0.0706414	-0.00870284	-0.0173851	-3.31921	1.01899	9.10575e-09	0.870426	0.958556	1.41889e-06	0.320996	4.24602e-05	8.30076e-07	0.0523792	0.488167	0.959438	0.992015
459	3-amino-2-piperidone	1900	TRUE	-1.44511	-0.0113572	0.0656803	0.466156	-0.0416535	0.0237216	0.0041348	7.381	2.15221	7.78238e-26	0.870891	0.203348	1.4534e-25	0.538312	8.53131e-32	0.217734	5.71593e-06	0.123628	0.959438	0.798683
379	pregnanediol-3-glucuronide	1900	TRUE	2.00651	0.011164	-0.010978	-0.485434	-0.137294	-0.0233338	-0.0245493	6.84934	3.12806	1.13059e-49	0.871131	0.829073	2.17985e-28	0.0394428	1.00845e-31	1.07981e-13	1.9142e-05	0.0230679	0.959438	0.976775
43	caffeine	1900	TRUE	-0.541424	0.0119643	0.0133126	-0.0244366	0.0362289	0.00572264	0.00946578	1.33764	-4.92289	0.000230412	0.872764	0.809424	0.608347	0.616628	0.00810249	0.00830658	0.44188	0.000986784	0.959438	0.976775
1	4-guanidinobutanoate	1900	TRUE	0.00697995	-0.0107754	0.054713	0.850132	-0.021401	0.00367232	-0.0185514	8.29487	1.72976	0.958017	0.872951	0.271813	5.9784e-87	0.743007	0.059593	9.7566e-09	1.24261e-07	0.199381	0.959438	0.87385
213	C-glycosyltryptophan	1900	TRUE	-2.02024	0.0110653	0.094845	-0.133756	-0.0814528	0.0216018	0.0361901	7.02958	-0.636098	8.88392e-50	0.872984	0.0636598	0.00246621	0.224406	3.9225e-27	1.26205e-27	1.28812e-05	0.645917	0.959438	0.683762
211	ribitol	1900	TRUE	-1.61217	-0.0112705	0.0455549	0.112229	0.212842	0.00600044	0.0444931	-4.2551	-3.28405	6.39133e-31	0.873628	0.384264	0.0130935	0.00192953	0.00342216	4.30889e-39	0.00990552	0.0205087	0.959438	0.919286
887	X - 12544	1900	TRUE	0.370962	0.0115609	-0.0239361	0.120382	-0.0116362	0.00107885	-0.0165523	3.094	3.68756	0.0109462	0.876009	0.661957	0.010918	0.871205	0.614753	3.26342e-06	0.0728929	0.0128444	0.959438	0.971569
767	3-phenylpropionate (hydrocinnamate)	1900	TRUE	0.904296	-0.0109775	-0.0182899	-0.0502688	-0.0799901	0.0075453	-0.0441139	9.97288	3.14622	8.09327e-11	0.876636	0.726308	0.265431	0.242906	0.000225877	1.31165e-38	1.38525e-09	0.0261336	0.959438	0.976775
729	glycolithocholate sulfate*	1900	TRUE	0.38141	-0.0112948	-0.0270012	-0.049138	-0.0677738	0.00290659	-0.0174479	8.31361	3.23479	0.00833475	0.877824	0.618927	0.294757	0.340953	0.171488	7.54464e-07	1.17437e-06	0.0277344	0.959438	0.971569
160	lithocholate sulfate (1)	1900	TRUE	-0.413857	-0.0113426	0.000432984	-0.0720623	-0.0468967	0.00603269	0.00573573	0.206176	-0.455823	0.005099	0.879945	0.993774	0.132759	0.519129	0.00549054	0.111609	0.906132	0.761552	0.959438	0.995254
567	1-stearoyl-2-adrenoyl-GPC (18:0/22:4)*	1900	TRUE	-0.993382	0.0107852	-0.0100584	0.0389068	-0.00775056	-0.00177752	0.0378058	6.40546	3.82942	2.14874e-12	0.880712	0.84977	0.396384	0.911353	0.392602	6.10343e-28	0.00012919	0.00772761	0.959438	0.976775
450	X - 12844	1900	TRUE	-1.35403	0.0107606	-0.134201	0.287471	-0.328788	0.0130118	0.024855	1.52128	-4.48745	1.77706e-21	0.88169	0.0120042	4.70166e-10	2.67252e-06	4.95389e-10	8.01962e-13	0.366162	0.00191728	0.959438	0.545072
815	vanillylmandelate (VMA)	1900	TRUE	-1.79077	-0.00985551	0.114297	-0.0245754	-0.118719	0.0405669	-0.00582265	4.69605	-0.76972	8.33102e-43	0.881935	0.0197506	0.561798	0.0647613	4.15118e-99	0.0675848	0.00237027	0.562002	0.959438	0.545072
228	4-chlorobenzoic acid	1900	TRUE	-0.231858	0.0111654	0.0666495	0.0745817	0.0365156	0.00584594	-0.00362895	-1.77294	0.484946	0.117147	0.88197	0.230348	0.120259	0.616177	0.00720926	0.314798	0.311262	0.747167	0.959438	0.841623
445	palmitoyl ethanolamide	1900	TRUE	-0.744805	0.0110229	-0.0140228	-0.073287	-0.182642	0.010366	0.0107709	2.9575	0.384705	3.63e-07	0.882222	0.798665	0.122799	0.01127	1.4659e-06	0.00256502	0.087772	0.796028	0.959438	0.976775
49	X - 12026	1900	TRUE	-2.2164	-0.010116	0.00859367	0.0438064	-0.0931817	0.02043	0.0436621	9.27834	1.88193	6.11914e-61	0.882415	0.864969	0.31566	0.159574	5.42251e-25	2.37298e-40	5.65652e-09	0.168949	0.959438	0.978217
283	1-palmitoyl-2-(hydroxylinoleoyl)-GPC (16:0/18:2(OH))*	1900	TRUE	0.379974	-0.0108611	-0.0156816	0.0896767	-0.306095	0.00527077	-0.0222325	-0.9079	-1.38313	0.0089669	0.883144	0.773946	0.0572691	1.899e-05	0.013679	3.67068e-10	0.597697	0.349398	0.959438	0.976775
799	X - 21467	1900	TRUE	-0.811794	0.0103941	-0.0456523	-0.0735604	0.747687	-0.00146453	0.0292621	-2.30197	-0.449867	5.83981e-09	0.883398	0.383318	0.103935	1.26751e-27	0.475044	7.91123e-18	0.162994	0.750988	0.959438	0.919286
99	trans-4-hydroxyproline	1900	TRUE	-0.106271	0.0108089	0.0201548	0.204666	0.209465	-0.00323692	0.00538134	-2.72733	6.10554	0.465888	0.883971	0.712662	1.49765e-05	0.00350475	0.13088	0.130158	0.113751	3.77122e-05	0.959438	0.976775
141	1-palmitoyl-2-arachidonoyl-GPI (16:0/20:4)*	1900	TRUE	-1.16231	0.0103751	0.0435766	-0.151665	-0.153548	0.00767457	0.0304377	4.57905	-2.88076	3.86537e-16	0.886273	0.416226	0.00105537	0.0288782	0.000255315	2.32597e-18	0.0067059	0.0471154	0.959438	0.930021
430	X - 17676	1900	TRUE	-1.01723	0.0100619	0.152939	0.111002	-0.0177335	0.0133115	0.0101773	19.3796	-0.596485	2.33151e-13	0.886579	0.00334461	0.0136969	0.795236	6.91177e-11	0.00265357	3.94146e-32	0.672505	0.959438	0.514003
52	cholate	1900	TRUE	-0.390755	0.0104173	-0.033709	0.299098	-0.0656022	0.00147646	0.00790785	-2.52193	-3.88016	0.00747028	0.888398	0.538844	2.75253e-10	0.361601	0.491772	0.0264852	0.144528	0.00897324	0.959438	0.952276
79	retinol (Vitamin A)	1900	TRUE	-0.529103	-0.00972309	0.0357514	0.59321	0.138984	0.011518	-0.00991261	5.41977	-2.67898	0.000119647	0.889371	0.488805	2.46806e-40	0.0401053	1.22863e-08	0.00313644	0.000867856	0.0553644	0.959438	0.949816
227	1-linoleoyl-GPG (18:2)*	1900	TRUE	-0.57986	0.0102703	-0.0127865	0.103088	0.0130206	-0.000868295	0.0206164	-2.298	0.819565	7.0441e-05	0.889824	0.81544	0.0293825	0.856128	0.685607	6.93316e-09	0.1831	0.580514	0.959438	0.976775
651	5alpha-pregnan-3beta,20alpha-diol disulfate	1900	TRUE	1.49654	0.00951885	0.0147858	-0.488113	-0.0570548	-0.0232264	-0.00689606	-0.02606	0.101311	1.42698e-27	0.89168	0.774664	7.44352e-28	0.399427	1.5594e-30	0.0398717	0.987224	0.942238	0.959438	0.976775
305	branched chain 14:0 dicarboxylic acid**	1900	TRUE	1.01161	0.00917834	-0.0290099	-0.0115962	-0.0637624	0.0121818	-0.056194	3.11052	3.50226	7.89961e-14	0.893879	0.568253	0.791753	0.338717	9.3637e-10	6.59515e-65	0.0521748	0.0109375	0.959438	0.960734
633	phenylpyruvate	1900	TRUE	0.158576	0.00952187	-0.0356514	0.588723	0.139286	-0.0100795	0.00295601	0.241378	-3.2144	0.259031	0.893911	0.499192	3.60011e-38	0.0440227	1.06315e-06	0.388472	0.884555	0.0244109	0.959438	0.949816
389	X - 24813	1900	TRUE	-0.0300469	-0.00990678	-0.0713327	0.0738275	-0.114136	0.00136953	-0.00114444	0.79097	-2.27477	0.839891	0.895717	0.201497	0.125955	0.119006	0.531101	0.752449	0.653089	0.132426	0.959438	0.798683
544	N-stearoyl-sphingosine (d18:1/18:0)*	1900	TRUE	-1.93045	-0.00914297	0.0472511	0.0285674	0.0653443	0.00945806	0.0518264	-4.30758	-3.31915	9.8965e-45	0.895955	0.360367	0.522094	0.334613	2.9246e-06	8.63115e-54	0.00813962	0.0176282	0.959438	0.916162
718	X - 24328	1900	TRUE	1.04246	0.0084793	-0.0802038	0.797135	-0.208324	-0.0246029	-0.00406043	2.26581	-0.460576	3.37492e-16	0.896101	0.0945834	1.97814e-82	0.000925781	3.41873e-39	0.192704	0.133938	0.722885	0.959438	0.720053
85	1-carboxyethylphenylalanine	1900	TRUE	-2.27417	0.00862214	-0.012206	0.468294	0.33193	0.011601	0.0532996	-4.86831	-3.42298	2.1276e-68	0.896261	0.802734	1.33812e-28	2.19609e-07	1.32767e-09	2.90079e-63	0.00156705	0.00966033	0.959438	0.976775
465	fumarate	1900	TRUE	-0.025248	-0.009462	0.0705098	0.0334758	0.0295186	0.0111051	-0.0193716	2.69478	-0.304275	0.862187	0.898142	0.1967	0.478015	0.68014	2.06773e-07	4.78303e-08	0.117387	0.836954	0.960304	0.798683
500	1-palmityl-2-palmitoyl-GPC (O-16:0/16:0)*	1900	TRUE	1.25982	-0.00893062	-0.0455964	-0.043426	-0.501683	-0.0116905	-0.0214409	8.30888	0.205465	3.78712e-19	0.900727	0.388709	0.341975	4.68083e-13	1.65782e-08	4.41734e-10	6.20499e-07	0.885915	0.961663	0.919286
367	phenyllactate (PLA)	1900	TRUE	0.0232359	0.00817596	0.0224931	0.942951	-0.039685	-0.00828968	0.000390028	4.75783	0.0345289	0.858213	0.901559	0.645123	1.23983e-110	0.535383	1.45766e-05	0.902175	0.00199115	0.979166	0.961663	0.971569
888	andro steroid monosulfate C19H28O6S (1)*	1900	TRUE	0.680331	-0.00807404	0.00753629	0.527764	-0.121484	-0.0261779	0.014136	-4.60835	-3.86511	3.22629e-07	0.905019	0.880184	2.45779e-34	0.0638156	8.72891e-41	1.35027e-05	0.00344304	0.00429514	0.964205	0.983351
63	sphingomyelin (d18:1/25:0, d19:0/24:1, d20:1/23:0, d19:1/24:0)*	1900	TRUE	-0.828903	0.00871874	-0.121538	0.244487	-0.187549	0.00793248	0.0146469	5.43792	-0.0501598	1.2106e-08	0.906118	0.0260816	2.20701e-07	0.00881809	0.000208108	3.67356e-05	0.00158141	0.972941	0.96423	0.58779
270	oleoyl ethanolamide	1900	TRUE	-0.482435	-0.00842303	0.0388236	-0.235085	-0.235721	0.0141161	-0.00293758	3.38475	-1.4566	0.000828902	0.908566	0.47373	5.12491e-07	0.00090656	2.87239e-11	0.404086	0.0474593	0.320769	0.964703	0.944808
541	arabitol/xylitol	1900	TRUE	-1.40826	0.00785605	0.0790481	0.482149	0.0590003	0.0246588	0.000320655	3.79799	-3.51121	5.49541e-25	0.909773	0.122774	1.20599e-27	0.379606	9.60505e-35	0.923241	0.0186186	0.0113385	0.964703	0.74401
312	1-stearoyl-2-dihomo-linolenoyl-GPC (18:0/20:3n3 or 6)*	1900	TRUE	-1.75164	0.00777252	-0.0249323	-0.112265	-0.00143356	0.00459502	0.0559475	8.1741	-0.218947	1.6638e-38	0.909792	0.622808	0.0103545	0.982788	0.0205969	9.98937e-65	3.09296e-07	0.873231	0.964703	0.971569
547	1-methyl-5-imidazoleacetate	1900	TRUE	-0.633781	0.00783659	0.00698917	0.574217	0.0254917	0.00846025	-0.000211283	9.09816	1.82165	6.42379e-06	0.912586	0.894585	2.07184e-36	0.712391	4.19411e-05	0.950839	4.401e-08	0.202059	0.966522	0.983351
752	ceramide (d18:1/17:0, d17:1/18:0)*	1900	TRUE	-1.69828	0.0074966	0.0172809	0.0597295	0.0130668	0.0129063	0.0376743	-1.95438	-1.9077	3.39335e-33	0.91696	0.744969	0.193112	0.851178	5.4813e-10	9.78608e-28	0.243023	0.1847	0.968373	0.976775
643	X - 12798	1900	TRUE	-1.01924	-0.00762195	0.0408492	0.099636	0.0712872	0.00218231	0.0303044	3.77612	0.12474	1.86508e-12	0.917445	0.452152	0.0337768	0.316914	0.304968	9.10682e-18	0.0274125	0.932416	0.968373	0.934338
269	N-acetylalanine	1900	TRUE	-1.78555	0.00713418	0.0771008	0.227716	-0.0116746	0.0151569	0.0338481	3.36647	1.88066	3.58754e-37	0.920222	0.14295	5.4944e-07	0.865641	1.9092e-13	4.23136e-23	0.0423714	0.186871	0.968373	0.780954
779	9-hydroxystearate	1900	TRUE	0.562856	0.00671732	-0.00677742	-0.875759	-0.08006	-0.00412188	-0.000805679	7.19453	-4.50461	2.05175e-05	0.920329	0.891366	9.34121e-93	0.218455	0.0338845	0.80267	4.20398e-06	0.000799062	0.968373	0.983351
505	N1-Methyl-2-pyridone-5-carboxamide	1900	TRUE	-1.42626	0.00706219	-0.0204583	0.323404	0.099231	0.0132031	0.0234018	5.52404	-0.897387	6.44039e-24	0.921726	0.700063	1.79875e-12	0.154065	2.15635e-10	1.18132e-11	0.000963135	0.532502	0.968373	0.971569
158	imidazole lactate	1900	TRUE	0.0909691	-0.00706389	0.0211046	0.265276	-0.219919	0.00211836	-0.00988607	14.4007	-0.36158	0.524069	0.922453	0.693871	1.02248e-08	0.00175617	0.312953	0.00454163	1.54957e-17	0.803285	0.968373	0.971569
646	(S)-a-amino-omega-caprolactam	1900	TRUE	-1.54041	0.00685693	0.0490935	0.528767	-0.023935	0.0156272	0.0203661	7.87927	0.502358	1.26489e-28	0.922553	0.346178	7.51152e-32	0.726089	1.8802e-14	1.79965e-09	1.60186e-06	0.721788	0.968373	0.904302
125	1-methylnicotinamide	1900	TRUE	0.630076	0.0070708	0.0108094	-0.15957	-0.0554673	0.00536396	-0.0293469	3.9352	-2.37355	1.25416e-05	0.923161	0.841826	0.000649546	0.434739	0.0114332	7.49598e-17	0.0211354	0.105528	0.968373	0.976775
30	1-myristoyl-2-docosahexaenoyl-GPC (14:0/22:6)*	1900	TRUE	-0.179451	0.00689272	0.00671536	-0.345377	-0.0983431	0.0158488	-0.0157185	0.143886	-1.93487	0.207244	0.924061	0.899982	7.29221e-14	0.160322	3.56688e-14	5.95437e-06	0.931894	0.181007	0.968373	0.983351
428	alpha-ketoglutarate	1900	TRUE	-1.31501	-0.00660418	-0.032752	0.35663	0.341978	0.0109761	0.0220427	-1.52149	-2.66899	7.95278e-21	0.926301	0.534706	5.06575e-15	7.62308e-07	1.07289e-07	1.26654e-10	0.360045	0.0616469	0.968384	0.952189
258	X - 24728	1900	TRUE	-1.78737	0.00637949	0.0833152	0.317272	0.06914	0.0232693	0.0183225	5.1338	-1.75348	1.19052e-38	0.927242	0.106528	1.12228e-12	0.306931	1.13457e-30	4.67621e-08	0.00159855	0.209565	0.968384	0.72554
867	X - 24307	1900	TRUE	-0.281431	-0.00678871	-0.028326	-0.143815	-0.0741157	-0.000143531	0.0130446	-4.49846	0.573039	0.0546137	0.927314	0.606448	0.00246543	0.303869	0.946846	0.000260788	0.00942339	0.700268	0.968384	0.971569
392	malate	1900	TRUE	-0.00982707	0.00646917	0.087201	0.22923	0.0152883	0.00916495	-0.0193792	0.5471	0.158858	0.945733	0.929742	0.107735	9.8599e-07	0.829683	1.57717e-05	3.75858e-08	0.748774	0.913807	0.969789	0.72579
650	myo-inositol	1900	TRUE	-0.534433	-0.00620775	0.0466747	0.0901559	-0.0697846	0.0212387	-0.0189707	4.84728	1.73598	0.000152955	0.931039	0.378537	0.0489621	0.315237	1.39577e-24	3.61234e-08	0.00370499	0.226349	0.970012	0.919286
103	1-stearoyl-2-arachidonoyl-GPI (18:0/20:4)	1900	TRUE	-0.948553	-0.00609747	0.0943121	-0.0634692	-0.12178	0.0160145	0.00726739	-1.09614	-3.2262	5.02344e-11	0.933768	0.0819158	0.175353	0.0866196	4.53422e-14	0.0390843	0.521091	0.0279326	0.971726	0.709714
300	X - 15492	1900	TRUE	-2.10925	-0.00538978	-0.0586321	0.719431	0.049477	0.0145277	0.0406709	1.9357	-4.0449	2.83992e-58	0.935506	0.233519	3.14067e-64	0.443169	4.7291e-14	4.61267e-37	0.211961	0.00239801	0.972406	0.841623
497	linolenoylcarnitine (C18:3)*	1900	TRUE	-0.50494	-0.00514966	0.0741274	0.563373	-0.0718729	0.0141427	-0.0137293	-4.96431	-3.38465	0.000300211	0.942166	0.15756	1.71505e-35	0.295889	5.70321e-12	5.6017e-05	0.00266664	0.0171378	0.977612	0.781914
702	1-docosahexaenoyl-GPE (22:6)*	1900	TRUE	0.0945748	0.00511007	0.0824228	-0.0928414	0.220518	0.0188282	-0.0360486	-3.47297	-1.40021	0.498987	0.942697	0.116622	0.0407641	0.00136345	5.45404e-20	4.43426e-26	0.0358862	0.324795	0.977612	0.74401
831	taurochenodeoxycholate	1900	TRUE	-0.369582	0.0046766	0.0197063	-0.00138401	0.170817	0.00110364	0.0100901	-7.3842	-1.35498	0.0114697	0.94981	0.719614	0.976718	0.0176189	0.607626	0.00466924	1.9655e-05	0.361907	0.983849	0.976775
601	1-stearoyl-2-dihomo-linolenoyl-GPI (18:0/20:3n3 or 6)*	1900	TRUE	-1.02449	0.00433548	0.096624	-0.161768	-0.283456	0.0125702	0.0177092	2.15437	-9.1795	6.77311e-13	0.952298	0.0711748	0.000470876	5.39831e-05	2.032e-09	3.58023e-07	0.201695	2.42056e-10	0.984384	0.709071
469	hydroxy-N6,N6,N6-trimethyllysine*	1900	TRUE	-1.19144	-0.00428055	0.00654413	0.4699	0.101887	0.0127448	0.0138262	0.115631	0.365956	4.19908e-17	0.952606	0.902128	1.59144e-24	0.144165	9.5513e-10	6.3621e-05	0.945024	0.799478	0.984384	0.983351
771	4-hydroxyhippurate	1900	TRUE	-0.451979	-0.00427539	-0.00778425	-0.0867145	0.17563	0.0109332	-0.00207896	-6.39677	1.41156	0.00194128	0.954001	0.886971	0.0668246	0.0144352	3.41797e-07	0.55903	0.000209903	0.341053	0.984384	0.983351
19	X - 16938	1900	TRUE	0.0889308	0.00424134	0.0145279	0.132359	-0.0333138	0.00367068	-0.0112618	-2.85666	1.22054	0.545155	0.954721	0.792384	0.00550466	0.645224	0.0894006	0.00168651	0.100482	0.414012	0.984384	0.976775
339	X - 17335	1900	TRUE	-0.286636	-0.00389432	-0.0283917	0.0515115	-0.173549	0.0100197	-0.00643909	-1.93778	2.09113	0.0506782	0.958335	0.60622	0.278991	0.0162379	3.38058e-06	0.071957	0.264202	0.160788	0.986206	0.971569
135	X - 13553	1900	TRUE	-1.55111	0.0035306	0.10402	0.273828	-0.0398119	0.0347223	-0.0083959	-7.01656	6.27015	6.19212e-31	0.958689	0.0388851	3.09949e-10	0.546516	2.12007e-69	0.0102911	9.80872e-06	4.24866e-06	0.986206	0.63384
178	2-aminoheptanoate	1900	TRUE	-0.916819	0.00368843	0.0237877	0.1343	0.0569861	0.00863294	0.015485	-3.96426	4.29648	2.80565e-10	0.960166	0.662884	0.00438625	0.425678	5.32986e-05	1.25511e-05	0.0211361	0.00363213	0.986593	0.971569
256	imidazole propionate	1900	TRUE	-0.845996	0.00319923	0.0335715	0.429089	0.212938	0.00327566	0.0174512	-5.27755	-0.5878	3.04379e-09	0.964809	0.530929	1.85443e-20	0.00243269	0.118411	5.35224e-07	0.00177218	0.685295	0.988422	0.951802
829	hexanoylglutamine	1900	TRUE	-1.06229	-0.00318087	0.0241771	-0.00286545	-0.124779	0.0126282	0.0169049	-3.96217	-0.715546	3.00142e-13	0.965719	0.658411	0.951635	0.0817724	3.68392e-09	1.95577e-06	0.021487	0.628863	0.988422	0.971569
686	5-methyluridine (ribothymidine)	1900	TRUE	0.272977	0.00307491	0.0454626	0.433398	-0.0465056	0.00536417	-0.0251235	4.51032	-0.850779	0.0531203	0.965809	0.391039	2.93185e-21	0.503313	0.00974343	2.97323e-13	0.00692292	0.553234	0.988422	0.919286
712	theophylline	1900	TRUE	-0.29629	-0.00313379	-0.031721	-0.0502933	-0.0339014	0.00510626	0.00278175	7.12526	-4.64013	0.0427134	0.966359	0.563416	0.288971	0.637628	0.0175289	0.435477	3.81102e-05	0.00179668	0.988422	0.960734
28	maleate	1900	TRUE	-0.900165	-0.00284584	0.0713986	0.0137149	0.34901	0.0123999	0.00817756	5.68879	0.242667	3.55266e-10	0.968874	0.185197	0.768298	7.80354e-07	4.1815e-09	0.0195096	0.000807698	0.86789	0.988659	0.798683
804	1-ribosyl-imidazoleacetate*	1900	TRUE	-1.21387	-0.00263199	0.0737309	0.555735	-0.0315321	0.0178386	0.00442322	10.2172	1.66807	8.2841e-19	0.969859	0.151993	7.59669e-36	0.640272	8.59689e-19	0.185922	2.97966e-10	0.231248	0.988659	0.781914
337	N6,N6,N6-trimethyllysine	1900	TRUE	-0.543994	0.0026691	0.0474859	0.659483	-0.0509205	0.00393998	0.00345546	3.53247	1.31176	9.29469e-05	0.969901	0.363597	2.58696e-48	0.457392	0.0541935	0.308883	0.0319652	0.353891	0.988659	0.916162
217	succinate	1900	TRUE	0.212891	-0.00265692	-0.0930706	-0.0721059	-0.0441943	-0.0010643	-0.0037879	-1.53301	1.61324	0.141791	0.97122	0.0871877	0.12505	0.535565	0.617391	0.283967	0.371276	0.273454	0.988878	0.709714
504	ribonate	1900	TRUE	-0.860718	0.00230217	0.0115214	-0.0791034	0.0294583	0.0120251	0.0107733	1.68784	1.75549	2.95704e-09	0.975086	0.832475	0.0927377	0.679933	1.71305e-08	0.00233181	0.325401	0.233832	0.990898	0.976775
243	1-palmityl-2-oleoyl-GPC (O-16:0/18:1)*	1900	TRUE	1.74737	0.00205095	-0.0227096	-0.259217	-0.419562	0.00346182	-0.0623946	4.82239	2.65006	1.83082e-40	0.975463	0.644854	1.12856e-09	8.2673e-11	0.0727294	1.29228e-84	0.00189535	0.0469432	0.990898	0.971569
351	X - 11378	1900	TRUE	0.221995	-0.00205239	-0.118399	0.560894	0.260388	-0.0148461	0.0099566	-9.75686	1.72783	0.105711	0.976521	0.0215757	2.1047e-36	0.000115894	1.85819e-13	0.00293878	1.86544e-09	0.215483	0.990898	0.545072
185	perfluorooctanesulfonate (PFOS)	1900	TRUE	-0.825234	0.00176901	-0.0376279	0.749354	0.149607	0.0217372	-0.0183172	-0.0674478	1.65273	2.44715e-10	0.978698	0.442092	2.95732e-70	0.0197405	8.20697e-30	8.44608e-09	0.965123	0.21235	0.991983	0.934338
331	X - 12707	1900	TRUE	-0.140951	-0.0014363	0.0868192	0.184986	-0.142918	0.0235077	-0.0378453	0.67959	7.52654	0.301687	0.983478	0.0902343	2.93468e-05	0.0333933	1.05667e-31	6.12755e-30	0.673864	5.78875e-08	0.995702	0.709714
810	thioproline	1900	TRUE	-0.950436	-0.00120195	-0.0576337	0.319752	0.140661	0.00342234	0.0232189	4.42865	-1.40386	4.16287e-11	0.9869	0.286644	7.76455e-12	0.0472956	0.106103	3.9212e-11	0.00936772	0.337706	0.997514	0.880426
667	erythronate*	1900	TRUE	-1.73711	-0.00109995	0.0720263	0.338703	0.118753	0.0204041	0.0211098	4.73026	-2.01624	2.70876e-36	0.987494	0.164799	3.98546e-14	0.0806348	9.13513e-24	3.69682e-10	0.00378959	0.150895	0.997514	0.781914
585	arginine	1900	TRUE	0.214913	0.000913098	-0.052406	0.0514297	-0.211763	0.00280395	-0.011558	-8.21776	-0.221534	0.140422	0.990167	0.3384	0.276809	0.00316966	0.190802	0.00115523	1.89743e-06	0.88117	0.998013	0.902068
830	tyramine O-sulfate	1900	TRUE	-0.804379	0.000906402	-0.0192787	0.0758741	0.26836	0.00537708	0.0173749	0.152694	0.669833	3.18823e-08	0.990216	0.724083	0.107791	0.000178049	0.0119148	9.74142e-07	0.929297	0.650506	0.998013	0.976775
577	1-oleoyl-GPE (18:1)	1900	TRUE	0.777837	-0.000527836	0.0932414	0.237311	0.0987781	0.000872844	-0.0339347	8.1612	-2.24875	4.1144e-08	0.994155	0.0799036	2.47767e-07	0.15702	0.675437	1.02067e-22	1.1477e-06	0.118729	0.998057	0.709714
724	dimethylarginine (SDMA + ADMA)	1900	TRUE	-1.24722	0.00043313	0.0679444	0.249019	-0.213723	0.0243315	-9.69465e-05	5.01955	-5.04269	6.42092e-19	0.995156	0.197428	4.54672e-08	0.00198389	4.46514e-32	0.977418	0.00251209	0.000409985	0.998057	0.798683
609	picolinate	1900	TRUE	0.137868	0.000355732	-0.0789049	0.64247	-0.0106092	0.00388821	-0.0194443	-5.32253	4.47155	0.316863	0.995945	0.127125	7.06327e-47	0.875668	0.054861	7.19946e-09	0.00109182	0.00140588	0.998057	0.749367
467	3-methylhistidine	1900	TRUE	-0.435326	0.000301605	-0.0230861	0.277851	0.0916987	0.00651794	9.0405e-05	7.84834	1.77915	0.00268919	0.996735	0.671675	3.52835e-09	0.199072	0.00224078	0.979619	4.81261e-06	0.227596	0.998057	0.971569
603	trans-2-hexenoylglycine	1900	TRUE	-0.146908	-0.000269904	0.118605	-0.616793	-0.133319	0.0167243	-0.0154609	4.12403	1.40521	0.284637	0.996914	0.0214246	1.31042e-43	0.0485602	1.18427e-16	3.92117e-06	0.0111347	0.314051	0.998057	0.545072
695	X - 24455	1900	TRUE	0.0594609	-0.000286657	-0.0369607	0.202475	-0.0497722	0.000154942	-0.00456733	2.54418	-0.784509	0.686296	0.996943	0.503767	2.2396e-05	0.492235	0.942934	0.203511	0.144155	0.600146	0.998057	0.949816
204	1-margaroyl-2-oleoyl-GPC (17:0/18:1)*	1900	TRUE	-0.0972239	4.84038e-05	-0.02129	-0.10854	-0.0897254	0.0177319	-0.0246898	1.86593	-0.905562	0.494049	0.999465	0.690033	0.0185956	0.199816	2.18679e-17	1.09069e-12	0.267323	0.530921	0.999465	0.971569

## Sheet: Delta Age Results
	col1	n	converged	Intercept	C(Delta_Age_Status_Indiv, Treatment(reference=1))[T.Bio_Young]	C(Delta_Age_Status_Indiv, Treatment(reference=1))[T.Bio_Old]	C(sex)[T.M]	meds_cholesterol[T.Yes]	age	BMI_CALC	PC1	PC2	Intercept_p	C(Delta_Age_Status_Indiv, Treatment(reference=1))[T.Bio_Young]_p	C(Delta_Age_Status_Indiv, Treatment(reference=1))[T.Bio_Old]_p	C(sex)[T.M]_p	meds_cholesterol[T.Yes]_p	age_p	BMI_CALC_p	PC1_p	PC2_p	Bio_Young_pval_adj	Bio_Old_pval_adj
513	1,5-anhydroglucitol (1,5-AG)	1345	TRUE	0.0948298	0.0551267	-0.414232	0.375206	-0.228885	-0.0110077	0.0142609	3.10191	-1.22802	0.565354	0.466662	6.29687e-10	1.36785e-12	0.00362415	4.74044e-06	0.000538172	0.118165	0.496102	0.746659	5.642e-07
490	urea	1345	TRUE	-1.07746	-0.36229	0.365527	0.601131	0.0841715	0.0212116	-0.00604092	4.47412	-2.78097	1.86704e-12	2.4853e-07	4.01785e-09	1.79277e-34	0.248633	1.92672e-21	0.11388	0.0150826	0.0964784	0.000222683	1.8e-06
687	glucose	1345	TRUE	-1.88315	-0.162458	0.308195	0.206218	0.21288	0.0109896	0.0434526	-4.27598	-0.0951104	2.13063e-33	0.0236525	1.22107e-06	3.97898e-05	0.00431733	1.4442e-06	9.64344e-29	0.0230884	0.955657	0.203935	0.000364692
745	1-(1-enyl-stearoyl)-2-linoleoyl-GPE (P-18:0/18:2)*	1345	TRUE	0.501809	-0.288403	0.318762	0.0144909	-0.366239	0.00841561	-0.030233	-10.348	-0.0923333	0.00283466	0.000186419	3.03377e-06	0.788251	4.93447e-06	0.000597475	6.03952e-13	3.14119e-07	0.959951	0.0144924	0.000679564
730	1-(1-enyl-palmitoyl)-2-oleoyl-GPE (P-16:0/18:1)*	1345	TRUE	0.541151	-0.283999	0.311563	-0.0201055	-0.248444	0.00404855	-0.0245849	-6.77298	2.83125	0.00182123	0.000365281	9.88793e-06	0.718153	0.00269052	0.109711	1.42396e-08	0.00118506	0.135867	0.0192525	0.00129955
252	X - 13835	1345	TRUE	-0.649417	-0.24541	0.292233	0.554942	0.0277143	0.00700572	0.00425784	5.59844	2.02555	7.66697e-05	0.0011343	1.18019e-05	6.36136e-26	0.723478	0.0034418	0.299302	0.00461683	0.259468	0.0390896	0.00129955
788	1-(1-enyl-stearoyl)-2-oleoyl-GPE (P-18:0/18:1)	1345	TRUE	0.424105	-0.2919	0.309007	-0.0661023	-0.127033	0.00771855	-0.0257703	-5.52836	3.03011	0.0147228	0.000255688	1.21201e-05	0.236217	0.125597	0.00233532	2.97223e-09	0.00824628	0.111112	0.0156135	0.00129955
610	N2,N5-diacetylornithine	1345	TRUE	-0.385621	-0.203748	0.284262	0.188742	-0.0175667	0.0266908	-0.0338243	7.12125	6.85715	0.0165323	0.00580797	1.36033e-05	0.000256876	0.818931	5.49961e-30	3.87968e-17	0.000235163	9.75082e-05	0.100076	0.00129955
756	1-methylhistidine	1345	TRUE	-0.893408	-0.218551	0.279335	0.610529	0.161612	0.015636	-0.00321692	4.72313	2.70271	1.97927e-08	0.00277981	1.55058e-05	6.27732e-33	0.0332537	1.61704e-11	0.418406	0.0136656	0.120516	0.067961	0.00129955
428	alpha-ketoglutarate	1345	TRUE	-1.53359	0.0525706	0.281452	0.343325	0.255039	0.0127102	0.024547	-1.70159	-1.60487	1.24865e-21	0.475647	1.5827e-05	2.66467e-11	0.000865324	5.65103e-08	9.25595e-10	0.37843	0.360692	0.747779	0.00129955
560	1-(1-enyl-palmitoyl)-2-linoleoyl-GPE (P-16:0/18:2)*	1345	TRUE	0.43139	-0.353561	0.294943	0.174752	-0.259442	0.000254211	-0.0166568	-14.1298	0.359835	0.0103626	4.73742e-06	1.59543e-05	0.00121435	0.00122847	0.9175	7.42103e-05	3.02515e-12	0.845011	0.00138216	0.00129955
340	1-palmitoyl-2-oleoyl-GPC (16:0/18:1)	1345	TRUE	-0.00225456	0.000224746	0.295776	-0.198498	-0.131612	0.0120797	-0.0164629	5.02375	-1.23742	0.989661	0.997755	2.84766e-05	0.000378576	0.112768	1.9298e-06	0.000151997	0.0164351	0.515562	0.998085	0.00212625
23	X - 12100	1345	TRUE	-1.876	-0.095365	0.28327	0.148871	-0.162171	0.0265135	0.0169673	8.98132	1.28514	5.15138e-29	0.215801	3.23927e-05	0.00570884	0.0427604	2.37946e-27	5.17482e-05	8.70802e-06	0.483837	0.515044	0.00223261
454	4-acetamidobutanoate	1345	TRUE	-1.37751	-0.107745	0.27652	0.113446	0.217296	0.0284352	-0.00213512	-0.528419	-0.506888	8.37898e-17	0.156079	3.87595e-05	0.0326498	0.0058973	4.68054e-32	0.605436	0.790725	0.779409	0.440141	0.00248061
716	1-palmitoyl-2-palmitoleoyl-GPC (16:0/16:1)*	1345	TRUE	-0.775336	0.0326565	0.267014	-0.423738	0.105456	0.00170779	0.0294242	9.37118	-3.96196	2.04247e-06	0.663069	5.65601e-05	6.12046e-16	0.175662	0.473194	5.39332e-13	1.84738e-06	0.0265088	0.854547	0.00327066
708	acisoga	1345	TRUE	-0.852034	-0.157013	0.285447	0.0646401	0.0419692	0.0148909	0.0031757	-0.0766217	0.0398758	1.22113e-06	0.0514703	6.27675e-05	0.251409	0.616316	6.07056e-09	0.469082	0.971078	0.983436	0.286443	0.00327066
881	N-acetylvaline	1345	TRUE	-1.71975	-0.00952246	0.276976	0.257664	0.0888163	0.0189735	0.0232457	3.71128	-0.324734	8.36405e-24	0.90344	6.64339e-05	2.65551e-06	0.276087	2.74207e-14	5.23586e-08	0.0712748	0.862137	0.960313	0.00327066
578	1-palmitoyl-2-oleoyl-GPI (16:0/18:1)*	1345	TRUE	-0.308644	-0.032572	0.272452	-0.343029	-0.418994	0.0034315	0.0116105	8.32959	-0.436082	0.0668505	0.673571	6.80559e-05	2.20653e-10	1.82894e-07	0.162366	0.00578319	3.96389e-05	0.812867	0.860956	0.00327066
70	N-palmitoyl-sphinganine (d18:0/16:0)	1345	TRUE	-1.3174	-0.0378015	0.280046	0.0335246	-0.0608512	0.00752425	0.0316677	-0.996373	-4.14784	2.92077e-14	0.634722	6.93556e-05	0.546693	0.461642	0.00290973	2.57273e-13	0.632856	0.028659	0.841799	0.00327066
95	5alpha-pregnan-3beta,20alpha-diol monosulfate (2)	1345	TRUE	1.50267	0.365446	-0.253545	-0.434537	-0.0922051	-0.0221387	-0.0105832	6.14706	1.68815	5.66596e-21	6.45526e-07	9.49136e-05	2.54578e-17	0.226765	2.26167e-21	0.00807018	0.00140465	0.334522	0.000289195	0.00425213
487	3-hydroxyisobutyrate	1345	TRUE	-0.586212	-0.038901	0.27197	0.286635	0.0376496	-0.000339531	0.0154447	-3.26215	-2.00026	0.000667078	0.622845	0.000101593	2.17216e-07	0.646825	0.892499	0.000332089	0.115638	0.288463	0.837586	0.00433464
258	X - 24728	1345	TRUE	-1.66325	-0.246017	0.251169	0.364415	0.0370375	0.0237625	0.0142473	1.45992	0.776567	7.64517e-25	0.000913919	0.000129963	2.12704e-12	0.630877	6.59095e-24	0.000416695	0.452879	0.660427	0.0368579	0.00525322
120	X - 23314	1345	TRUE	0.01525	-0.0315119	0.263236	0.138827	-0.00334272	0.0159492	-0.0301739	3.97453	3.05834	0.928466	0.68618	0.000136066	0.0108863	0.967092	1.20991e-10	1.15361e-12	0.0518852	0.0997667	0.860956	0.00525322
65	X - 11880	1345	TRUE	0.137854	-0.00985834	-0.262754	0.319542	0.219281	-0.0164391	0.019051	-8.00139	-2.19615	0.418834	0.899793	0.00014837	5.26051e-09	0.0070165	3.82616e-11	7.72939e-06	9.66244e-05	0.239006	0.959779	0.00525322
803	X - 11372	1345	TRUE	0.583761	-0.0314485	-0.262776	0.443579	0.0314744	-0.0143102	-0.000745712	-4.05494	-3.46308	0.0006417	0.68878	0.000155032	6.41623e-16	0.699621	9.60738e-09	0.861433	0.0488337	0.0641342	0.860956	0.00525322
351	X - 11378	1345	TRUE	0.191547	-0.139593	-0.252056	0.555151	0.215064	-0.0166212	0.0147895	-9.58527	-1.48112	0.243106	0.063913	0.000155805	5.62234e-26	0.00600304	3.77787e-12	0.000308738	1.21395e-06	0.409281	0.304607	0.00525322
124	thyroxine	1345	TRUE	-0.294605	0.204874	-0.261777	-0.424974	0.0640219	-0.00460475	0.0245766	-2.25887	-3.1689	0.0842028	0.00890893	0.0001583	8.42105e-15	0.431438	0.0642085	8.08383e-09	0.271281	0.0894853	0.120337	0.00525322
179	5alpha-pregnan-3beta,20beta-diol monosulfate (1)	1345	TRUE	1.5033	0.312593	-0.234036	-0.467955	-0.161562	-0.0271265	-0.0010148	-0.311629	0.375165	3.8901e-22	1.17951e-05	0.000208971	6.44255e-21	0.0292811	5.11532e-33	0.793766	0.867665	0.825313	0.00150978	0.00668706
573	X - 22162	1345	TRUE	-0.353886	-0.0579604	0.247534	-0.0603617	0.10313	0.0176641	-0.0170348	13.7379	-4.92129	0.031859	0.443913	0.000219069	0.254052	0.189777	2.04859e-13	3.53986e-05	4.43541e-12	0.00636074	0.736031	0.00676848
502	N-acetylcitrulline	1345	TRUE	-1.86057	-0.132273	0.243887	0.360007	0.133777	0.0144565	0.0351849	5.87292	7.31442	1.4581e-29	0.0804102	0.000268645	9.9787e-12	0.0887589	1.79323e-09	1.25852e-17	0.00306389	4.94946e-05	0.332016	0.00772471
644	2-hydroxybutyrate/2-hydroxyisobutyrate	1345	TRUE	-1.10618	-0.0272912	0.24985	0.242329	0.112936	0.00436982	0.0271412	-5.71918	-4.41389	5.66478e-11	0.724765	0.000268774	7.73778e-06	0.160772	0.0759177	1.22819e-10	0.0048805	0.0168357	0.884727	0.00772471
890	guanidinoacetate	1345	TRUE	0.458274	-0.0628791	-0.235218	0.586049	-0.151424	0.000831574	-0.0227744	-0.178131	2.7512	0.00400095	0.389728	0.000275882	1.92138e-30	0.0461808	0.720263	1.03003e-08	0.925941	0.114191	0.686044	0.00772471
175	N-acetyl-isoputreanine	1345	TRUE	-0.0122592	-0.0916855	0.250383	-0.0640677	-0.0893733	0.0173718	-0.029104	4.68853	-0.205049	0.942486	0.239909	0.000285867	0.240098	0.270166	2.3811e-12	7.05662e-12	0.021871	0.912154	0.549415	0.00776171
410	N-acetyl-1-methylhistidine*	1345	TRUE	-1.15379	-0.200627	0.240134	0.338159	-0.0862165	0.0209174	0.00108058	9.15139	7.06679	2.28866e-12	0.00788281	0.000324543	1.48945e-10	0.271736	2.75007e-18	0.792529	3.77282e-06	8.5503e-05	0.114983	0.00855266
423	X - 11308	1345	TRUE	0.289464	-0.10592	-0.233463	0.613045	0.160836	-0.0217787	0.0194866	-11.6506	-3.2065	0.070981	0.150137	0.000336605	9.94886e-33	0.0354383	1.21695e-20	1.13918e-06	1.55654e-09	0.0674623	0.438046	0.00861709
439	uracil	1345	TRUE	0.238032	0.10823	0.243167	0.150149	0.0199231	-0.00565809	-0.00327358	-2.16847	-0.844967	0.15645	0.160495	0.00036496	0.00535036	0.803617	0.0208997	0.435286	0.283419	0.645587	0.445211	0.00888248
552	1-stearoyl-2-oleoyl-GPI (18:0/18:1)*	1345	TRUE	0.465951	-0.0208565	0.242917	-0.261221	-0.521456	0.00719551	-0.0225308	5.35385	1.10633	0.00550587	0.78668	0.000366799	1.24313e-06	7.37608e-11	0.00328909	7.7349e-08	0.00804624	0.546806	0.907163	0.00888248
207	1-(1-enyl-stearoyl)-2-docosapentaenoyl-GPE (P-18:0/22:5n3)*	1345	TRUE	-0.019616	-0.0635993	0.253348	0.122367	-0.142756	0.00748423	-0.0147389	-2.5677	4.8698	0.911163	0.430764	0.000388592	0.0301195	0.0887031	0.00351244	0.000791045	0.224949	0.011333	0.728234	0.00916259
774	ethyl alpha-glucopyranoside	1345	TRUE	0.392912	-0.126182	0.251948	0.262335	0.147865	-0.0014006	-0.0167822	5.59654	3.54236	0.0254872	0.11815	0.000420679	3.36525e-06	0.0779803	0.585039	0.000133622	0.00819645	0.0655777	0.393862	0.00945716
438	linoleoyl-linolenoyl-glycerol (18:2/18:3) [2]*	1345	TRUE	-0.982633	0.0145029	-0.236	0.279182	0.165758	-0.00287908	0.0365355	-0.418834	-5.34165	2.48e-09	0.847991	0.000422195	1.30335e-07	0.0349651	0.230931	6.98515e-19	0.83275	0.00304279	0.933849	0.00945716
714	1-stearoyl-2-linoleoyl-GPI (18:0/18:2)	1345	TRUE	-0.0797372	-0.0555415	0.241048	-0.387028	-0.723956	0.00982738	-0.00577938	0.0689019	-3.67856	0.637652	0.474887	0.000455902	1.0584e-12	3.10107e-19	6.88245e-05	0.171762	0.973024	0.0469827	0.747779	0.00996313
523	4-cholesten-3-one	1345	TRUE	-1.65648	-0.0596255	0.242003	0.0329131	-0.194593	0.0140228	0.0352127	0.318853	-2.62205	2.52302e-22	0.44612	0.000473203	0.547428	0.0166922	1.68936e-08	1.34111e-16	0.876483	0.159621	0.736031	0.010095
531	N-acetylglycine	1345	TRUE	1.16939	-0.167429	0.22399	-0.331238	-0.292125	0.0111112	-0.0541427	6.67928	1.73229	2.24744e-13	0.0222055	0.000543771	9.67886e-11	0.000122737	1.77197e-06	4.47826e-42	0.000500966	0.320642	0.196992	0.0113307
467	3-methylhistidine	1345	TRUE	-0.496618	-0.164403	0.237224	0.268972	0.0752637	0.00859157	-0.000937098	6.8679	2.5545	0.0036205	0.0359204	0.000622375	9.12232e-07	0.355265	0.000557661	0.826046	0.000828248	0.171247	0.247779	0.0125941
134	X - 23587	1345	TRUE	-0.514313	-0.264807	0.233775	0.231486	0.0639552	0.0155732	-0.0116178	-5.36242	3.97949	0.00229334	0.000627057	0.000643782	1.90079e-05	0.42663	2.43119e-10	0.0058254	0.00824879	0.0310007	0.0280922	0.0125941
648	1,2-dipalmitoyl-GPC (16:0/16:0)	1345	TRUE	0.315147	-0.016218	0.243429	-0.0198663	-0.541069	0.00689325	-0.0219946	5.29021	1.14488	0.0728473	0.840653	0.00064657	0.724603	1.07068e-10	0.0071369	5.39817e-07	0.012352	0.551335	0.932209	0.0125941
174	2-hydroxy-3-methylvalerate	1345	TRUE	-0.0369379	-0.153914	0.213751	0.882049	0.0925628	-0.0134229	0.0121566	-1.53555	1.22406	0.813016	0.0318162	0.000751811	2.52895e-69	0.213987	3.77106e-09	0.00183124	0.413914	0.473612	0.235598	0.0142218
440	alpha-hydroxyisovalerate	1345	TRUE	0.0104111	-0.14371	0.227478	0.60926	0.0126909	-0.0105153	0.00946813	-2.01417	3.1771	0.950103	0.0599181	0.00076188	3.73246e-30	0.872942	1.465e-05	0.0227154	0.314454	0.0808351	0.304607	0.0142218
505	N1-Methyl-2-pyridone-5-carboxamide	1345	TRUE	-1.46038	-0.062493	0.230818	0.327733	0.120571	0.0148071	0.0210412	5.0956	-0.90558	7.08874e-18	0.422085	0.000803063	1.71592e-09	0.135986	2.11857e-09	6.76384e-07	0.0125182	0.625332	0.723754	0.0146846
75	phosphatidylethanolamine (P-18:1/20:4, P-16:0/22:5n3)*	1345	TRUE	0.237049	-0.217265	0.234637	0.170256	-0.191337	-0.00113411	-0.00873827	-7.54872	0.954731	0.175416	0.00683109	0.000959686	0.00242751	0.0218503	0.656666	0.0455492	0.000336731	0.617828	0.113345	0.0170015
393	1-palmitoyl-2-linoleoyl-GPI (16:0/18:2)	1345	TRUE	-0.767312	-0.0891823	0.227685	-0.316612	-0.442401	0.000447218	0.0325633	0.503107	-4.36857	6.27854e-06	0.252864	0.000967718	6.36596e-09	4.7694e-08	0.856749	1.67474e-14	0.805626	0.018723	0.562832	0.0170015
382	X - 15503	1345	TRUE	-2.52649	-0.151819	0.212912	0.31323	0.0796043	0.0271835	0.0381061	4.63855	-4.25483	2.54509e-56	0.038491	0.00103523	1.00822e-09	0.296243	1.89875e-31	1.33004e-21	0.0158565	0.0149089	0.254507	0.0174563
355	1-(1-enyl-stearoyl)-2-oleoyl-GPC (P-18:0/18:1)	1345	TRUE	1.14939	-0.0773437	0.202291	-0.280253	-0.56658	0.0195494	-0.0676366	-0.48333	5.12303	3.95969e-14	0.267705	0.00104981	9.18927e-09	5.4847e-15	1.14754e-18	5.46057e-71	0.791605	0.00205922	0.574333	0.0174563
683	X - 16087	1345	TRUE	-1.86655	-0.137626	0.219743	0.315399	0.159726	0.02294	0.0224704	1.20966	-4.15137	1.26261e-29	0.0694843	0.00105205	2.66616e-09	0.0425742	1.63948e-21	5.11339e-08	0.542746	0.0215418	0.314434	0.0174563
376	docosadioate (C22-DC)	1345	TRUE	0.38316	0.0131156	-0.227534	0.196019	-0.00633075	-0.00668201	-0.00348989	0.578193	0.668228	0.0257861	0.867989	0.00111623	0.000380036	0.938444	0.00767712	0.416287	0.779838	0.722244	0.946129	0.01796
429	(R)-3-hydroxybutyrylcarnitine	1345	TRUE	-0.884427	-0.0088218	0.222572	0.115159	0.0113542	0.0113186	0.00964353	-6.55532	-1.23389	1.45469e-07	0.909051	0.0011225	0.0329099	0.887457	3.94509e-06	0.0217235	0.00120253	0.502433	0.960507	0.01796
651	5alpha-pregnan-3beta,20alpha-diol disulfate	1345	TRUE	1.24949	0.304076	-0.211474	-0.424145	-0.0755327	-0.0224276	-0.000654783	0.126669	0.922059	8.25007e-15	3.86908e-05	0.0012162	2.1903e-16	0.325149	1.23056e-21	0.870623	0.947859	0.600432	0.00385189	0.0191177
809	1-(1-enyl-palmitoyl)-2-oleoyl-GPC (P-16:0/18:1)*	1345	TRUE	1.81038	-0.131809	0.187729	-0.395518	-0.521105	0.0135737	-0.0793174	0.83674	4.7531	9.72437e-36	0.0478279	0.00144316	1.9904e-17	5.05192e-14	1.40255e-10	3.48298e-106	0.631776	0.00274175	0.274999	0.02215
483	1-(1-enyl-palmitoyl)-2-palmitoleoyl-GPC (P-16:0/16:1)*	1345	TRUE	1.01054	-0.0591895	0.20495	-0.486356	-0.491337	0.00601043	-0.0375902	7.2756	3.34229	1.83916e-10	0.416115	0.00145854	1.19647e-21	8.1659e-11	0.00933245	2.26993e-21	0.000137196	0.0539295	0.715622	0.02215
541	arabitol/xylitol	1345	TRUE	-1.44162	-0.155744	0.204642	0.468975	0.119089	0.0261596	0.000530174	1.70904	-0.857441	1.10112e-19	0.032663	0.00150963	3.52385e-20	0.115887	1.37271e-29	0.893676	0.371189	0.621552	0.239886	0.0225438
77	mannose	1345	TRUE	-2.50885	-0.0331564	0.190795	0.22761	0.189682	0.00836094	0.0700179	1.26585	1.57209	8.72178e-64	0.627437	0.00159446	1.87915e-06	0.00752752	0.000116692	3.73421e-79	0.479652	0.334087	0.837978	0.0230048
354	5-hydroxylysine	1345	TRUE	-1.88724	-0.0883352	0.196253	-0.391893	0.0281307	0.0102371	0.0538873	13.765	-4.81806	7.5578e-35	0.209319	0.00161704	1.62033e-15	0.700363	4.64105e-06	5.32595e-45	8.45731e-14	0.0040502	0.512431	0.0230048
676	1-(1-enyl-palmitoyl)-2-arachidonoyl-GPE (P-16:0/20:4)*	1345	TRUE	0.200862	-0.222861	0.223602	0.201237	-0.0898816	-0.00486846	-0.00179784	-8.65377	1.26924	0.250012	0.00543791	0.00161753	0.000329715	0.280515	0.0558994	0.680215	3.82405e-05	0.506346	0.0955367	0.0230048
167	3-hydroxy-3-methylglutarate	1345	TRUE	-0.949118	0.0848532	0.205326	-0.103427	0.801186	0.0194584	-0.00271546	4.83958	2.17803	3.88276e-09	0.251486	0.00170902	0.0455548	1.96419e-25	1.24352e-16	0.499999	0.0125934	0.216637	0.562832	0.0235541
667	erythronate*	1345	TRUE	-1.92387	-0.119783	0.209196	0.319701	0.128414	0.0230159	0.0242304	4.45375	0.375725	1.14896e-31	0.112326	0.00172097	1.34197e-09	0.101319	7.61448e-22	3.56134e-09	0.0243093	0.834405	0.393142	0.0235541
783	linoleoyl-linoleoyl-glycerol (18:2/18:2) [1]*	1345	TRUE	-0.970416	0.0242118	-0.208942	0.358438	0.063694	-0.00434051	0.0388166	-6.03408	-8.14117	3.44793e-09	0.748139	0.00173501	1.04667e-11	0.416177	0.0699529	3.03841e-21	0.00226756	5.84635e-06	0.891619	0.0235541
797	indolepropionate	1345	TRUE	1.32574	0.126312	-0.209825	-0.0629651	-0.0394862	-0.000999877	-0.0430503	4.22544	0.488511	1.53364e-15	0.097966	0.00188833	0.237996	0.618531	0.680052	3.54204e-25	0.0347059	0.788212	0.361382	0.0250836
266	X - 11444	1345	TRUE	-1.57469	-0.080941	-0.20365	0.757054	0.0371068	0.00947342	0.0313064	4.28162	-3.39145	1.82065e-22	0.274962	0.00190367	2.54655e-48	0.629987	5.75547e-05	8.44157e-15	0.0275924	0.0548533	0.585192	0.0250836
145	ascorbic acid 3-sulfate*	1345	TRUE	-0.338809	-0.0866973	0.210122	0.119534	-0.0664319	0.0187951	-0.0231147	10.9477	0.922908	0.0426004	0.258448	0.00196205	0.0258259	0.404569	1.23188e-14	3.06684e-08	5.21812e-08	0.613598	0.562832	0.0254782
821	etiocholanolone glucuronide	1345	TRUE	1.39008	0.0323455	0.203461	0.590081	-0.121282	-0.0206267	-0.0224226	9.19982	2.9637	9.76379e-18	0.6638	0.00199711	7.98642e-30	0.116693	2.62517e-18	3.05584e-08	2.40138e-06	0.0945747	0.854547	0.025563
403	choline phosphate	1345	TRUE	0.956949	0.140212	-0.215516	0.110336	0.00970548	-0.0123746	-0.0152835	0.0744262	-0.0647609	2.64885e-08	0.0758359	0.00203798	0.0456593	0.905838	8.10296e-07	0.000375396	0.971322	0.972543	0.328794	0.0257188
547	1-methyl-5-imidazoleacetate	1345	TRUE	-0.686674	-0.168429	0.207265	0.576601	0.0268774	0.010513	-0.00169666	8.65441	2.72393	3.43216e-05	0.0268836	0.00207996	2.26303e-27	0.733892	1.36714e-05	0.68198	1.43606e-05	0.132993	0.215069	0.0258839
290	palmitoyl dihydrosphingomyelin (d18:0/16:0)*	1345	TRUE	0.241399	-0.151541	0.205862	-0.280737	-0.565968	0.0127109	-0.0232792	-0.412971	0.192553	0.143775	0.0456275	0.00214554	1.17723e-07	6.69254e-13	1.30475e-07	1.66663e-08	0.835387	0.915102	0.272549	0.0263343
274	alpha-tocopherol	1345	TRUE	-0.675731	-0.116782	0.224722	0.0866115	-0.135465	0.0192227	-0.00789912	-2.50596	1.852	0.000181422	0.158791	0.00217584	0.134912	0.115631	2.82885e-13	0.0798015	0.248691	0.348237	0.44323	0.0263453
88	1-(1-enyl-stearoyl)-2-linoleoyl-GPC (P-18:0/18:2)*	1345	TRUE	1.54672	-0.145647	0.192291	-0.226314	-0.524018	0.00796702	-0.0628142	-5.77275	4.75025	1.95151e-23	0.0407618	0.00226332	5.4239e-06	1.38656e-12	0.000426183	3.79525e-59	0.00197814	0.00509639	0.263263	0.0269592
863	glutamine conjugate of C6H10O2 (1)*	1345	TRUE	-0.935707	-0.041064	0.211207	0.00715596	-0.0825412	0.0179755	0.0013618	0.154104	-0.111802	4.04759e-08	0.59983	0.00228672	0.895945	0.310067	4.82294e-13	0.749135	0.940128	0.95219	0.823044	0.0269592
216	4-hydroxyphenylacetylglutamine	1345	TRUE	-1.99938	-0.123128	0.202529	0.274751	0.148511	0.0247822	0.0245433	-1.50017	-2.89667	2.63947e-34	0.101382	0.00231993	1.70271e-07	0.0571831	3.048e-25	1.95282e-09	0.446408	0.105732	0.372219	0.0269955
757	1-stearoyl-2-oleoyl-GPC (18:0/18:1)	1345	TRUE	-0.072278	-0.0602906	0.209552	-0.218991	-0.0637678	0.0164275	-0.0215527	4.51342	2.0631	0.670638	0.439733	0.00240076	5.9543e-05	0.431512	3.40864e-11	3.8441e-07	0.0273462	0.267094	0.736031	0.0275779
733	decadienedioic acid (C10:2-DC)**	1345	TRUE	-0.775735	-0.0350192	0.211626	-0.253335	-0.0315868	0.0054087	0.0206745	9.06008	0.423495	7.41993e-06	0.659489	0.00261364	5.12192e-06	0.702053	0.0321557	1.74363e-06	1.36912e-05	0.82302	0.85429	0.0296433
107	X - 21339	1345	TRUE	-0.320314	-0.119213	-0.20415	0.345326	0.194422	-0.0168935	0.0356203	-10.2389	-2.65315	0.0557413	0.12096	0.00268348	1.31068e-10	0.0149168	4.56847e-12	1.6475e-17	3.75508e-07	0.147431	0.398455	0.030055
603	trans-2-hexenoylglycine	1345	TRUE	-0.208929	-0.0416206	0.197624	-0.54046	-0.213691	0.0192813	-0.0186513	1.51231	0.168503	0.199937	0.578122	0.00283685	5.13356e-25	0.00598881	5.02541e-16	4.63946e-06	0.44078	0.924707	0.813233	0.0313805
189	pyroglutamine*	1345	TRUE	0.107293	-0.00260773	-0.166628	1.21754	-0.0417332	0.00202878	-0.0220734	10.4169	4.34333	0.437975	0.967249	0.00302085	1.45327e-165	0.527066	0.314584	1.68319e-10	3.92578e-10	0.00409832	0.982602	0.0330084
794	methionine sulfoxide	1345	TRUE	-0.113943	-0.0429881	0.210606	-0.0518566	0.134623	0.0037106	-0.00515128	2.86701	3.9684	0.515793	0.593343	0.00310441	0.356805	0.10747	0.14675	0.23956	0.174269	0.0385318	0.818777	0.0335127
820	(N(1) + N(8))-acetylspermidine	1345	TRUE	-0.721744	-0.139612	0.21716	0.448155	-0.0661884	0.00951443	0.00104017	1.66929	-0.377584	6.84259e-05	0.0934341	0.00318246	1.32732e-14	0.443956	0.000319244	0.818312	0.444167	0.848966	0.360849	0.0339462
55	quinolinate	1345	TRUE	-2.25336	0.053221	0.188923	0.0708329	0.0451336	0.0127015	0.0547128	10.1117	0.5529	4.09608e-46	0.463327	0.00325325	0.162635	0.549407	3.58491e-08	1.1545e-43	1.06347e-07	0.74912	0.745316	0.0342931
829	hexanoylglutamine	1345	TRUE	-1.13603	-0.0903128	0.202541	0.0644618	-0.260717	0.0169628	0.0111798	-6.6014	-0.294421	2.72408e-11	0.248775	0.00345863	0.238961	0.00135165	9.12258e-12	0.00868925	0.00129994	0.8746	0.562832	0.0360341
367	phenyllactate (PLA)	1345	TRUE	-0.050559	-0.0674517	0.181588	0.931848	0.00255378	-0.0072411	0.000880564	3.4666	2.86691	0.743369	0.341432	0.00379142	7.45055e-79	0.972343	0.00130342	0.819441	0.0621557	0.0896514	0.6509	0.0390473
609	picolinate	1345	TRUE	0.151628	0.0857564	0.192194	0.693715	-0.0217354	0.00273481	-0.0194221	-5.04427	5.34902	0.356055	0.255589	0.00397556	1.57738e-39	0.781505	0.253703	2.21938e-06	0.0107395	0.00291544	0.562832	0.0404785
6	2-hydroxydecanoate	1345	TRUE	0.468526	-0.0424231	0.197574	0.114119	-0.198111	0.0116793	-0.0375451	2.07988	0.326667	0.00569244	0.585551	0.00409643	0.0358755	0.0142414	2.28784e-06	7.32461e-19	0.307792	0.8601	0.815256	0.040836
524	1-eicosapentaenoyl-GPE (20:5)*	1345	TRUE	-0.272021	-0.141284	0.190562	0.109468	0.18534	0.0228435	-0.0312671	5.73157	1.14404	0.0960824	0.059757	0.00410183	0.0369265	0.0174473	9.45554e-22	1.89734e-14	0.00357449	0.522261	0.304607	0.040836
283	1-palmitoyl-2-(hydroxylinoleoyl)-GPC (16:0/18:2(OH))*	1345	TRUE	0.358742	-0.116953	0.188824	-0.000182552	-0.334792	0.00598622	-0.0215709	-0.0575601	-2.42811	0.0270158	0.116378	0.00416263	0.997203	1.51519e-05	0.0114008	1.02217e-07	0.976482	0.171213	0.393862	0.0409477
861	beta-hydroxyisovalerate	1345	TRUE	-0.165287	-0.112013	0.193594	0.70448	0.0598879	-0.00497462	0.0058643	-4.18034	4.19242	0.321193	0.143126	0.00422841	1.24669e-39	0.451121	0.0406338	0.15885	0.037101	0.0214275	0.430338	0.0409477
655	branched-chain, straight-chain, or cyclopropyl 10:1 fatty acid (1)*	1345	TRUE	0.73502	-0.0376735	0.196378	-0.57089	-0.167157	0.00199656	-0.0223331	6.23005	0.574727	1.38595e-05	0.627548	0.00425287	7.18637e-26	0.0382525	0.41823	1.24828e-07	0.00220749	0.756043	0.837978	0.0409477
198	N-acetyltyrosine	1345	TRUE	-1.83651	-0.090591	0.191241	0.249012	-0.0535393	0.016547	0.0337373	4.20585	2.22248	9.4632e-29	0.231981	0.00434153	2.6029e-06	0.496533	6.27418e-12	2.80667e-16	0.0342641	0.218379	0.538484	0.0409477
306	1-palmitoyl-2-linoleoyl-GPC (16:0/18:2)	1345	TRUE	0.0577899	-0.0326073	0.205644	-0.203298	-0.671699	0.00557582	-0.00585739	-2.10645	-9.68091	0.744758	0.689087	0.00434155	0.000359236	2.13589e-15	0.0312501	0.18652	0.324137	6.16519e-07	0.860956	0.0409477
435	6-bromotryptophan	1345	TRUE	0.108044	0.291803	-0.196124	0.28951	0.0172021	-0.00814493	0.00603803	7.23974	-4.82589	0.526401	0.000194094	0.00463727	1.23001e-07	0.832528	0.00105769	0.156407	0.000420115	0.0096834	0.0144924	0.0432812
330	vanillactate	1345	TRUE	-1.42806	-0.0663665	0.191975	0.30358	0.0210229	0.0226857	0.00826242	4.05087	6.42503	1.47448e-17	0.387957	0.0047596	1.61188e-08	0.792369	1.53443e-20	0.0482162	0.0444044	0.000451096	0.684407	0.043965
731	(S)-3-hydroxybutyrylcarnitine	1345	TRUE	-1.06015	0.0237158	0.193625	-0.0613595	0.153283	0.0150433	0.0102695	-6.81465	-1.81367	4.1969e-10	0.760858	0.00497248	0.259977	0.0582941	1.21806e-09	0.0154237	0.000849131	0.328578	0.895833	0.0454627
100	N-acetylhistidine	1345	TRUE	-0.710798	-0.140311	0.180169	0.134975	-0.109012	0.024977	-0.0168844	7.88414	3.83979	8.0619e-06	0.0549739	0.00534457	0.00826998	0.15124	5.61936e-27	2.19145e-05	3.89381e-05	0.0274943	0.29579	0.048371
565	1-palmitoyl-2-linoleoyl-GPE (16:0/18:2)	1345	TRUE	-0.348915	0.0151633	0.196025	-0.300753	0.00398583	0.00129156	0.0141135	-4.14732	-6.91352	0.0447728	0.849346	0.00550732	7.06606e-08	0.961667	0.610496	0.00115604	0.0474844	0.000277695	0.933849	0.0487259
652	myristoyl dihydrosphingomyelin (d18:0/14:0)*	1345	TRUE	-0.391693	-0.136081	0.18487	-0.356701	-0.334442	0.00745335	0.00814549	7.37349	-1.02266	0.0170411	0.0710207	0.00556545	1.29277e-11	1.94777e-05	0.00185203	0.0470164	0.000190169	0.569028	0.31659	0.0487259
106	1-(1-enyl-stearoyl)-2-arachidonoyl-GPE (P-18:0/20:4)*	1345	TRUE	0.169941	-0.126441	0.198415	0.114736	0.0231159	-0.00129495	-0.00654321	-6.62035	4.44566	0.335051	0.118246	0.00558835	0.0425787	0.783391	0.614481	0.137325	0.00180654	0.0211383	0.393862	0.0487259
832	1-palmitoyl-2-arachidonoyl-GPE (16:0/20:4)*	1345	TRUE	-0.086775	0.113008	0.194846	-0.326219	0.359205	-0.00304513	0.00999296	0.169394	1.00193	0.616293	0.1552	0.00560131	4.36994e-09	1.36839e-05	0.22789	0.020881	0.935219	0.596826	0.440141	0.0487259
387	1-(1-enyl-palmitoyl)-2-linoleoyl-GPC (P-16:0/18:2)*	1345	TRUE	1.84979	-0.189485	0.177883	-0.116369	-0.619288	-0.00146136	-0.0589657	-5.02721	3.50904	1.60329e-31	0.00915929	0.00568474	0.0220532	2.43685e-16	0.5269	3.04253e-50	0.00834911	0.0427917	0.120337	0.0489763
517	1-(1-enyl-stearoyl)-2-docosahexaenoyl-GPE (P-18:0/22:6)*	1345	TRUE	0.704808	-0.279306	0.18307	0.0584471	-0.0160933	0.0148256	-0.0497123	-12.1665	3.79302	1.85863e-05	0.000219641	0.00618479	0.268658	0.837615	6.61213e-10	1.21833e-33	8.22378e-10	0.0351707	0.0151383	0.0527769
814	X - 21829	1345	TRUE	-1.54853	-0.0803004	0.188108	0.14284	0.0143269	0.0173536	0.0229629	-3.78582	-2.24771	7.6922e-20	0.303119	0.00639581	0.0087842	0.859627	2.45083e-12	6.2221e-08	0.0640161	0.226319	0.610325	0.0540627
766	1-palmitoyl-2-eicosapentaenoyl-GPC (16:0/20:5)*	1345	TRUE	-0.427212	-0.116871	0.183608	-0.0278514	0.188415	0.0205172	-0.0194175	5.40117	2.5949	0.0103047	0.126364	0.00663654	0.602298	0.0176888	2.95608e-17	3.0442e-06	0.00704001	0.154273	0.408745	0.0555733
337	N6,N6,N6-trimethyllysine	1345	TRUE	-0.609097	-0.0426188	0.183103	0.649611	-0.0307555	0.00529365	0.00305043	3.28237	0.243915	0.000251177	0.576882	0.00673638	4.74511e-34	0.698342	0.0291264	0.462961	0.101156	0.893376	0.813233	0.055887
824	phenylacetylglutamine	1345	TRUE	-0.643963	-0.0143238	0.179821	-0.0678124	0.163159	0.0206052	-0.0136994	7.53955	-0.245462	8.90316e-05	0.849428	0.00705833	0.198543	0.0373844	8.1208e-18	0.000846244	0.000137764	0.891379	0.933849	0.0580208
595	1-(1-enyl-palmitoyl)-2-docosahexaenoyl-GPE (P-16:0/22:6)*	1345	TRUE	0.428346	-0.350456	0.184473	0.0950934	-0.0514602	0.012168	-0.035729	-13.0676	4.00457	0.0113283	6.39916e-06	0.00725079	0.0798357	0.523584	8.10685e-07	2.76819e-17	1.37025e-10	0.0304289	0.00138216	0.0590609
576	N-acetylphenylalanine	1345	TRUE	-1.82167	-0.0531644	0.177604	0.602434	-0.0249682	0.0153993	0.0306561	4.58581	1.20247	5.8122e-29	0.477744	0.00734381	1.20456e-30	0.748263	9.55346e-11	5.3126e-14	0.0194867	0.500312	0.748355	0.0592798
849	sulfate*	1345	TRUE	-1.26529	-0.298385	0.184665	-0.222298	0.146176	0.0172935	0.0221916	5.38581	0.26643	9.99095e-14	0.000132375	0.00750143	4.63735e-05	0.0715068	3.0885e-12	1.74748e-07	0.00849552	0.886096	0.0118608	0.0596481
413	eicosenedioate (C20:1-DC)*	1345	TRUE	0.744977	-0.0812559	-0.178116	0.438705	0.0943597	-0.0206111	0.00405276	-10.4531	-0.8653	5.6095e-06	0.280728	0.00752259	8.0133e-17	0.22792	7.05406e-18	0.322744	1.19869e-07	0.629691	0.589692	0.0596481
710	1-palmitoyl-2-oleoyl-GPE (16:0/18:1)	1345	TRUE	-0.759695	0.115411	0.185193	-0.196176	0.391749	-0.000931105	0.0288933	0.526166	-1.93254	9.00261e-06	0.141811	0.00770671	0.000354069	1.58751e-06	0.709052	1.38275e-11	0.798335	0.301813	0.43006	0.060572
238	cysteinylglycine	1345	TRUE	0.48232	0.223152	-0.185669	0.341961	0.145325	-0.00582282	-0.0105321	7.11648	-1.19903	0.00513046	0.00479774	0.00798989	6.31284e-10	0.0770757	0.0205135	0.0144256	0.000601104	0.524723	0.0921475	0.0622517
214	N-acetylarginine	1345	TRUE	-1.00722	-0.189062	0.177865	0.200505	0.0771039	0.0200033	-0.00134068	9.18047	7.54475	1.31062e-09	0.0131368	0.00835603	0.000168274	0.330281	1.44708e-16	0.74652	4.34725e-06	3.26441e-05	0.148994	0.0645431
868	dopamine 3-O-sulfate	1345	TRUE	-0.138771	-0.100878	0.181637	0.0616497	0.10712	0.0168381	-0.0249656	5.45335	6.16155	0.41724	0.198993	0.00894436	0.261495	0.189243	1.48423e-11	5.1478e-09	0.00807787	0.000991379	0.498039	0.0684969
247	1-margaroyl-2-docosahexaenoyl-GPC (17:0/22:6)*	1345	TRUE	0.696004	-0.00350417	-0.170527	-0.0359646	0.0854937	0.0180802	-0.053255	-7.78459	-0.411791	1.73944e-05	0.962426	0.00955919	0.489165	0.268592	1.97632e-14	1.51776e-39	6.5422e-05	0.81625	0.982549	0.0722083
528	pseudouridine	1345	TRUE	-1.56382	-0.0240756	0.17578	0.254019	0.00595381	0.0220855	0.0146971	12.731	0.297791	8.31884e-21	0.753742	0.00962402	2.19245e-06	0.940474	1.30584e-19	0.00043192	2.47807e-10	0.870618	0.891801	0.0722083
94	2,3-dihydroxy-5-methylthio-4-pentenoate (DMTPA)*	1345	TRUE	-2.85986	-0.126038	0.152456	0.67225	0.119843	0.0291677	0.0425683	6.77507	-0.928929	1.6388e-86	0.0584475	0.00967076	2.9741e-47	0.0832839	3.06211e-43	7.34357e-32	0.000104251	0.558268	0.304607	0.0722083
164	N-acetylputrescine	1345	TRUE	-0.561872	-0.0804606	0.17949	-0.212612	0.352732	0.0126117	6.23462e-05	-3.83358	1.96612	0.00103547	0.306188	0.00987304	0.00010978	1.57535e-05	4.43282e-07	0.988373	0.0629059	0.293932	0.611012	0.0725757
789	ceramide (d18:2/24:1, d18:1/24:2)*	1345	TRUE	-1.04521	-0.166267	0.185555	0.0037285	-0.258401	0.0124702	0.0160751	-3.44316	-4.56566	3.57637e-09	0.040841	0.00988196	0.947692	0.0022178	1.37251e-06	0.000278904	0.106169	0.0184106	0.263263	0.0725757
287	nicotinamide	1345	TRUE	0.49179	0.209711	-0.177531	0.125363	0.12297	-0.0168937	0.00729255	-1.81584	-2.14735	0.00379155	0.0071708	0.0100833	0.0214884	0.12911	9.15971e-12	0.0857038	0.374454	0.247822	0.114983	0.0734525
56	X - 23782	1345	TRUE	0.175473	0.113044	0.17205	-0.406342	-0.217792	0.0140082	-0.0260911	-4.92517	-1.02178	0.288743	0.136596	0.0104386	1.94397e-14	0.00577065	6.35014e-09	2.70705e-10	0.0133559	0.572231	0.421427	0.0748852
385	N-acetyl-2-aminooctanoate*	1345	TRUE	-0.371146	-0.208846	0.166722	0.610354	0.0230714	0.0148469	-0.0200516	6.52158	5.89165	0.0205941	0.004544	0.0104472	1.8341e-32	0.762847	2.13991e-10	5.51372e-07	0.000723807	0.000778903	0.0911628	0.0748852
87	3-hydroxy-2-ethylpropionate	1345	TRUE	-0.756401	-0.00533004	0.176677	0.463523	0.0943247	0.00908246	0.00409641	9.88136	-0.149581	9.97788e-06	0.945944	0.0110714	3.32219e-17	0.248114	0.00027553	0.338196	1.62565e-06	0.936342	0.979188	0.0787284
674	X - 16935	1345	TRUE	-0.0601167	-0.0404452	-0.167128	0.277407	0.135718	-0.0166199	0.0265202	-21.4309	-1.49134	0.710816	0.586928	0.011159	9.79179e-08	0.0792927	2.08866e-12	5.84996e-11	4.66258e-28	0.400418	0.815256	0.0787284
356	2-hydroxyglutarate	1345	TRUE	-0.157588	0.0133679	0.172767	0.128182	0.0346501	0.0100587	-0.0162901	2.20374	3.32511	0.349519	0.862771	0.0115661	0.0177445	0.666285	4.23009e-05	0.000108248	0.277029	0.0711298	0.942735	0.0808292
143	2,3-dihydroxy-2-methylbutyrate	1345	TRUE	-0.443003	-0.183593	0.170217	0.415393	0.172533	0.012636	-0.0114348	0.73611	2.11624	0.00765309	0.016068	0.0116372	6.61161e-15	0.029433	1.8257e-07	0.00585497	0.712711	0.244115	0.161218	0.0808292
98	N-formylmethionine	1345	TRUE	-1.16095	-0.134478	0.175477	0.154612	-0.000505244	0.0205015	0.00458106	2.59863	2.4462	1.41611e-11	0.0882767	0.0119298	0.00505595	0.995082	2.81253e-16	0.285865	0.208914	0.193092	0.345397	0.0815803
688	creatine	1345	TRUE	-0.546182	-0.16556	0.156095	-0.779275	0.0914422	0.0050934	0.0209714	-5.17161	-3.91224	0.00035591	0.0183986	0.0119879	9.66205e-57	0.210082	0.0224111	4.0526e-08	0.00496499	0.0193694	0.17172	0.0815803
24	X - 18886	1345	TRUE	-0.528197	-0.0435771	0.178987	0.379334	-0.00869205	-0.000453225	0.0136167	-0.778027	-0.781476	0.00261959	0.588695	0.0120558	1.65832e-11	0.917315	0.859468	0.0018998	0.712657	0.683989	0.815256	0.0815803
148	X - 17010	1345	TRUE	0.218372	-0.0652416	0.176674	-0.0736263	-0.015465	-0.0124228	0.0132216	-11.9686	2.69409	0.207822	0.412423	0.0121096	0.185777	0.85165	8.95066e-07	0.0022663	9.68935e-09	0.155411	0.71338	0.0815803
522	phosphoethanolamine	1345	TRUE	0.634863	0.240371	-0.174612	-0.146249	-0.0363134	-0.01399	0.000361876	1.67338	-1.57418	0.000224242	0.0023425	0.0124653	0.0080853	0.65813	2.46544e-08	0.932898	0.41901	0.402883	0.0636025	0.0833502
693	3-(4-hydroxyphenyl)lactate	1345	TRUE	-1.26451	-0.158612	0.157248	0.884832	0.00520745	0.00301534	0.0278904	0.622478	4.71974	3.66128e-16	0.0259873	0.0125958	1.27329e-70	0.943908	0.182697	6.22757e-13	0.73889	0.00542234	0.210768	0.0834626
422	cis-4-decenoate (10:1n6)*	1345	TRUE	-0.148752	0.0507621	-0.17342	-0.181046	-0.0856077	-0.000170559	0.00877327	-12.1297	1.30445	0.385099	0.518564	0.0126684	0.000989066	0.294668	0.945558	0.040301	3.98818e-09	0.486227	0.770883	0.0834626
591	alpha-ketobutyrate	1345	TRUE	-0.760339	-0.0327349	0.175641	0.0297258	0.0598278	-0.00214043	0.0288576	-5.42174	-3.93222	1.23786e-05	0.681909	0.0129251	0.594444	0.470892	0.398835	3.1206e-11	0.00960789	0.0387758	0.860956	0.0845324
405	X - 12411	1345	TRUE	-1.34556	-0.121936	0.165235	0.409985	0.18987	0.017961	0.0106716	4.41749	-0.884922	2.82275e-16	0.10638	0.0133874	8.08651e-15	0.0155153	7.00786e-14	0.00939698	0.025645	0.622815	0.384341	0.0869214
587	N-palmitoyl-sphingosine (d18:1/16:0)	1345	TRUE	-0.746578	-0.212761	0.181709	0.0890871	-0.157438	0.0113212	0.00848824	-2.27803	-2.92398	3.85259e-05	0.0106212	0.0136439	0.125934	0.0687913	1.86898e-05	0.0610097	0.296687	0.140529	0.132175	0.0879493
404	1-(1-enyl-stearoyl)-2-dihomo-linolenoyl-GPE (P-18:0/20:3)*	1345	TRUE	-0.366579	-0.0755634	0.173273	-0.00457689	-0.0637872	0.00552669	0.00358164	2.35619	1.1105	0.0346379	0.34289	0.0139535	0.934503	0.440899	0.0289661	0.408645	0.259221	0.558491	0.65091	0.0893024
66	glutamine conjugate of C6H10O2 (2)*	1345	TRUE	-1.20516	-0.0317492	0.1674	-0.125485	-0.144975	0.0180885	0.0123028	-3.25052	-2.71578	9.81731e-13	0.682326	0.0147134	0.0206635	0.0720268	2.11718e-13	0.00355702	0.109919	0.141687	0.860956	0.0934978
304	cholesterol	1345	TRUE	-0.690284	-0.234689	0.175271	0.0334788	-0.707464	0.0164025	0.00205903	0.238032	0.134513	9.88607e-05	0.00393788	0.0149385	0.556309	5.9806e-17	2.24361e-10	0.642	0.911179	0.944702	0.0840082	0.09426
670	methyl-4-hydroxybenzoate sulfate	1345	TRUE	0.233955	-0.11245	-0.166303	-0.538152	0.0538279	0.00690829	-0.01167	-3.48452	4.49623	0.165102	0.146171	0.0151272	2.56147e-23	0.503131	0.00494497	0.0055741	0.0858262	0.0147311	0.433672	0.0947828
770	erucate (22:1n9)	1345	TRUE	0.245502	0.162982	0.165404	0.0864904	-0.0961595	0.0155958	-0.0379919	-1.87538	1.33791	0.146732	0.0358758	0.0160787	0.111183	0.233395	2.59355e-10	2.47287e-19	0.357007	0.469671	0.247779	0.100045
99	trans-4-hydroxyproline	1345	TRUE	-0.180151	-0.142945	0.165281	0.194233	0.158502	-0.00188985	0.00738733	-3.22796	3.81775	0.287901	0.0662614	0.0163731	0.000356996	0.0499636	0.444598	0.0810664	0.113604	0.0394964	0.307618	0.100441
118	tiglylcarnitine (C5:1-DC)	1345	TRUE	-0.597236	-0.171635	0.161434	0.611288	0.051535	0.012511	-0.00756549	-2.30286	0.828087	0.000311845	0.0240292	0.0164287	1.36262e-30	0.514265	2.23516e-07	0.0675152	0.248067	0.647667	0.203935	0.100441
871	1-(1-enyl-palmitoyl)-2-docosahexaenoyl-GPC (P-16:0/22:6)*	1345	TRUE	0.730475	-0.180821	0.159542	0.0650574	-0.172085	0.0141153	-0.0486649	-7.1071	3.52326	8.20332e-06	0.0161938	0.0164787	0.215882	0.0276181	3.43583e-09	1.271e-32	0.000311731	0.0492319	0.161218	0.100441
73	ergothioneine	1345	TRUE	0.168154	-0.129752	0.156995	0.206538	0.00611272	0.017169	-0.0361485	-10.5286	-0.873946	0.297755	0.0801202	0.0166899	6.75325e-05	0.936749	3.0988e-13	3.22484e-19	6.05808e-08	0.620772	0.332016	0.100487
158	imidazole lactate	1345	TRUE	0.217882	-0.107462	0.166984	0.280033	-0.176787	0.00203215	-0.0140822	10.2435	1.29266	0.204711	0.173071	0.0167105	3.80159e-07	0.0309765	0.417313	0.0010331	7.26252e-07	0.49152	0.461522	0.100487
21	isobutyrylcarnitine (C4)	1345	TRUE	-0.169533	-0.173387	0.163472	0.389351	0.166833	0.0136234	-0.0226446	-1.88084	-0.666837	0.314018	0.0249115	0.0168398	5.83027e-13	0.0377838	2.89283e-08	7.30338e-08	0.353354	0.71731	0.206673	0.10059
161	5-methylthioadenosine (MTA)	1345	TRUE	-1.61491	-0.10464	0.155535	0.0273213	0.251231	0.0157347	0.0269472	9.97617	-2.50341	7.88792e-24	0.155472	0.0170044	0.595734	0.00102813	1.76239e-11	1.77664e-11	2.38866e-07	0.153742	0.440141	0.100879
244	N4-acetylcytidine	1345	TRUE	-1.19229	-0.0054354	0.16093	0.0422217	0.275392	0.00257585	0.0365247	15.7945	-1.43713	7.5037e-13	0.943245	0.0171889	0.428893	0.000516619	0.288168	1.46039e-18	2.97569e-15	0.429467	0.979188	0.100879
807	1-linoleoyl-2-docosahexaenoyl-GPC (18:2/22:6)*	1345	TRUE	1.00409	-0.142388	0.155669	-0.0742238	-0.179196	0.0159987	-0.0602843	1.80708	3.28865	4.37209e-10	0.0539326	0.0172261	0.150657	0.0195549	9.24697e-12	7.58273e-51	0.350749	0.061691	0.29579	0.100879
101	indolelactate	1345	TRUE	0.23973	0.00898617	0.156073	0.773409	0.023771	-0.00590173	-0.00888149	5.47906	2.71472	0.138035	0.90362	0.0174413	2.91253e-50	0.757837	0.0122917	0.0278329	0.00485478	0.124667	0.960313	0.101477
32	methyl glucopyranoside (alpha + beta)	1345	TRUE	0.318873	0.0399416	0.164371	-0.0962255	0.0551889	0.0156557	-0.0369133	-1.96901	0.17635	0.061861	0.610447	0.0177982	0.0791462	0.498057	3.2496e-10	5.00394e-18	0.338038	0.924782	0.828728	0.102885
544	N-stearoyl-sphingosine (d18:1/18:0)*	1345	TRUE	-1.94206	-0.0362865	0.161131	0.0630537	0.0650469	0.00903617	0.0511665	-4.0553	-3.76433	5.65143e-31	0.637661	0.0180785	0.241718	0.41642	0.000222224	2.89137e-34	0.0446508	0.0402863	0.841799	0.103836
645	3-hydroxybutyrate (BHBA)	1345	TRUE	0.0946084	0.0496603	0.16492	-0.0618356	-0.193318	0.0067253	-0.0144784	-3.58942	-1.10554	0.582747	0.529947	0.0183848	0.263245	0.0185992	0.00740971	0.00076375	0.0833009	0.557265	0.77714	0.104776
557	N-acetylserine	1345	TRUE	-1.05691	0.0121337	0.161471	0.148951	0.0425294	0.0155882	0.00926865	7.98003	3.86484	3.76386e-10	0.875546	0.0184762	0.00595424	0.597221	2.3814e-10	0.0278873	8.51483e-05	0.0362639	0.951814	0.104776
362	glutarate (C5-DC)	1345	TRUE	-0.255312	-0.119636	0.165267	0.194054	0.0181801	0.00151722	0.00348149	-17.207	-0.844202	0.14224	0.134198	0.0193483	0.000510362	0.826589	0.54985	0.423086	2.0715e-16	0.657318	0.41896	0.109032
726	eicosanedioate (C20-DC)	1345	TRUE	0.894323	-0.0807426	-0.162596	0.230094	-0.0762139	-0.0101607	-0.0154001	-3.47702	1.17709	1.84592e-07	0.305204	0.019598	2.91755e-05	0.351549	4.86328e-05	0.000325184	0.092103	0.530382	0.610408	0.109749
869	X - 24337	1345	TRUE	-1.38162	-0.182505	0.149579	0.51177	0.0826319	-0.00474146	0.0491915	3.84021	2.72697	5.7138e-18	0.0129448	0.0213097	2.07801e-23	0.278758	0.0420811	7.81849e-35	0.0460486	0.119064	0.148994	0.118593
458	caprylate (8:0)	1345	TRUE	0.960263	0.0255197	0.162815	-0.407362	-0.108385	-0.00285387	-0.022942	-1.51005	1.78994	3.94226e-08	0.750501	0.0218383	3.84601e-13	0.193627	0.26293	1.48863e-07	0.472897	0.349196	0.891619	0.120785
700	glycosyl-N-stearoyl-sphingosine (d18:1/18:0)	1345	TRUE	-0.249466	0.0159377	0.158925	-0.327225	-0.345672	0.0132835	-0.00899269	-2.45562	-3.22704	0.145256	0.839392	0.0223461	2.64058e-09	2.32514e-05	1.04937e-07	0.0355713	0.233554	0.08498	0.932013	0.121402
632	X - 23974	1345	TRUE	0.47874	-0.054951	0.156727	0.0127742	-0.155889	0.0064564	-0.0264291	-3.12259	2.15708	0.00460315	0.478697	0.0223806	0.813766	0.053065	0.00878424	3.79844e-10	0.124624	0.243119	0.748539	0.121402
810	thioproline	1345	TRUE	-0.95592	0.00129338	-0.163052	0.395727	0.176515	0.00306564	0.0228799	4.40347	-2.1605	5.4099e-08	0.987216	0.0224086	2.3303e-12	0.0352974	0.231822	1.8909e-07	0.0374214	0.261227	0.991282	0.121402
141	1-palmitoyl-2-arachidonoyl-GPI (16:0/20:4)*	1345	TRUE	-1.06147	-0.0225017	0.157623	-0.214406	-0.117222	0.00466439	0.0325421	5.40062	-1.84586	4.32647e-10	0.773199	0.0224919	8.55868e-05	0.148424	0.0600082	1.85453e-14	0.00832292	0.321041	0.900892	0.121402
468	cis-4-decenoylcarnitine (C10:1)	1345	TRUE	-0.406023	0.0318585	-0.160038	0.13108	-0.0639415	0.00682396	0.00268754	-11.079	0.196887	0.0191641	0.688932	0.0230233	0.0184692	0.439317	0.00694658	0.534823	1.09287e-07	0.917295	0.860956	0.122418
344	androstenediol (3beta,17beta) disulfate (1)	1345	TRUE	0.205557	-0.000177357	0.148251	0.768423	-0.0495615	-0.0195908	0.0162123	-6.31425	-4.93502	0.201562	0.998085	0.0233485	4.79874e-50	0.518565	7.0551e-17	5.5254e-05	0.00111571	0.00506111	0.998085	0.122418
112	X - 12101	1345	TRUE	-0.491035	-0.0599699	0.157861	-0.0291353	0.0578946	0.0156901	-0.00953146	-2.73108	0.388426	0.00417176	0.446017	0.0233569	0.596372	0.478851	3.45156e-10	0.0260037	0.185519	0.835866	0.736031	0.122418
600	1-palmitoyl-GPE (16:0)	1345	TRUE	0.940772	-0.0175295	0.15692	-0.0798002	0.0782082	0.00694494	-0.0450963	5.08159	-1.58505	3.39591e-08	0.822749	0.0234075	0.144625	0.336046	0.0052054	3.24843e-26	0.0132387	0.395206	0.92734	0.122418
205	X - 12849	1345	TRUE	-0.219389	-0.097899	0.157955	0.0126981	0.161332	0.00446309	0.00123738	-1.92612	3.87183	0.20152	0.214467	0.0235734	0.817835	0.0489403	0.0748049	0.773058	0.351484	0.0393257	0.515044	0.122418
724	dimethylarginine (SDMA + ADMA)	1345	TRUE	-1.24515	0.0520849	0.152998	0.261277	-0.164388	0.0246403	-0.00173242	3.658	-2.31624	7.22067e-14	0.495342	0.0235745	9.94181e-07	0.0383216	3.14935e-24	0.676805	0.0677321	0.203113	0.757556	0.122418
889	homoarginine	1345	TRUE	-0.385206	0.0981576	-0.145958	0.393472	0.0197195	-0.0135307	0.0323945	-21.6595	-5.16164	0.0152738	0.178189	0.0236366	1.16031e-14	0.794595	5.13346e-09	3.17255e-16	8.97073e-30	0.0029613	0.468569	0.122418
31	X - 11470	1345	TRUE	0.14194	-0.117711	-0.154787	0.494802	0.0149142	-0.000689348	-0.00890374	9.26116	-0.254966	0.40009	0.128538	0.023872	6.28281e-20	0.852944	0.779308	0.0345992	5.07117e-06	0.890093	0.41132	0.122927
840	N-acetylglutamine	1345	TRUE	-0.568676	-0.0450733	0.155367	0.155284	-0.0380622	0.0160805	-0.00867807	9.26973	10.4165	0.000805851	0.562957	0.0242041	0.00436129	0.638222	8.19246e-11	0.0406631	5.67117e-06	2.00868e-08	0.807298	0.123925
555	11beta-hydroxyandrosterone glucuronide	1345	TRUE	-1.39892	-0.0700852	-0.149607	0.701931	0.1472	0.0112715	0.0221441	3.55758	-3.59973	1.48116e-17	0.352042	0.0247324	1.4837e-40	0.059914	2.45369e-06	6.50391e-08	0.0715271	0.0448172	0.657145	0.125911
860	1-carboxyethylvaline	1345	TRUE	-2.35956	-0.160797	0.141595	0.449659	0.256226	0.0150864	0.0508585	-4.76231	-0.786105	5.07006e-52	0.0242841	0.024949	2.04053e-19	0.00055019	2.86011e-11	3.51975e-39	0.0109257	0.643905	0.203935	0.126296
459	3-amino-2-piperidone	1345	TRUE	-1.55584	-0.177293	0.148295	0.499224	-0.0478489	0.0273034	0.00147375	7.9068	3.30774	1.39935e-21	0.0178693	0.0251425	1.43352e-21	0.538395	1.61877e-30	0.717478	5.59541e-05	0.0636435	0.170812	0.126481
800	ceramide (d16:1/24:1, d18:1/22:1)*	1345	TRUE	-1.3107	-0.111458	0.157839	0.042904	-0.013698	0.0143891	0.0204668	4.41428	-4.68776	4.48696e-14	0.162219	0.025268	0.441531	0.868679	1.34333e-08	2.39304e-06	0.0347167	0.0136102	0.448136	0.126481
657	nervonoylcarnitine (C24:1)*	1345	TRUE	-0.427354	0.05843	0.150061	0.391734	-0.247596	0.0211562	-0.0257877	-2.21886	-6.23013	0.00989725	0.442409	0.0257537	1.74805e-13	0.00172994	2.0242e-18	4.63985e-10	0.265807	0.000586411	0.736031	0.128196
491	1-arachidonoyl-GPE (20:4n6)*	1345	TRUE	-0.0750353	0.00367887	0.157727	0.154293	0.15436	0.000751644	-0.00279171	4.8967	2.31443	0.667135	0.963368	0.026029	0.00586161	0.0636126	0.767677	0.521809	0.0196991	0.22521	0.982549	0.128851
759	glutamine conjugate of C7H12O2*	1345	TRUE	-1.0662	0.00295888	0.15533	-0.0867844	-0.139598	0.0160682	0.0105771	0.282607	-0.411949	5.73291e-10	0.970117	0.0262183	0.116007	0.0889019	1.50805e-10	0.0138454	0.89143	0.826712	0.98401	0.129075
582	1-palmitoyl-2-arachidonoyl-GPC (16:0/20:4n6)	1345	TRUE	-0.339831	0.02651	0.158095	-0.0975078	0.183174	-0.00167496	0.0148344	4.5576	4.39991	0.0534952	0.742853	0.0269948	0.0843103	0.0291092	0.514026	0.000740318	0.0314225	0.0222786	0.891026	0.132171
156	X - 12524	1345	TRUE	-0.105928	0.0876284	0.149751	-0.160109	-0.104327	0.00961541	-0.0125577	1.78922	-2.22163	0.525658	0.252832	0.02718	0.00280096	0.190051	7.80762e-05	0.00259649	0.373092	0.223651	0.562832	0.132355
395	phenol sulfate	1345	TRUE	-0.568746	-0.0364629	0.154132	0.173125	0.105595	0.00596585	0.00660212	-2.89297	-2.52105	0.000947354	0.644367	0.027411	0.00171746	0.198192	0.0174222	0.124502	0.162376	0.180367	0.847802	0.132758
324	1-palmitoleoyl-2-linolenoyl-GPC (16:1/18:3)*	1345	TRUE	-0.114718	-0.0590388	0.152525	-0.42166	-0.276272	0.0077759	-0.00142261	3.53676	-6.61377	0.502838	0.45262	0.0282864	1.67603e-14	0.000717105	0.00184433	0.739417	0.0860914	0.000413081	0.737359	0.135882
58	sphingomyelin (d18:2/14:0, d18:1/14:1)*	1345	TRUE	-1.49335	-0.0645285	0.130362	-0.88154	-0.439353	0.0171881	0.0377099	4.75332	-2.16777	1.97507e-24	0.33705	0.0283593	1.57756e-78	3.14129e-10	8.25175e-16	6.26414e-25	0.00698162	0.175831	0.648765	0.135882
237	N-acetylglutamate	1345	TRUE	-1.33027	-0.188425	0.14333	-0.372067	0.164498	0.0178103	0.0232443	-1.914	1.79618	1.60413e-16	0.010936	0.0286651	6.5723e-13	0.0324845	3.66155e-14	7.94145e-09	0.324084	0.308576	0.134229	0.136119
229	deoxycarnitine	1345	TRUE	-0.634716	-0.18082	-0.132525	1.07393	-0.125456	0.00896631	-0.00532777	-2.35602	-0.850433	2.08855e-05	0.00828267	0.0287126	1.9041e-111	0.0778473	3.75889e-05	0.152761	0.189385	0.6022	0.114983	0.136119
622	1-myristoyl-2-palmitoyl-GPC (14:0/16:0)	1345	TRUE	-0.0927489	-0.0199166	0.150403	-0.314956	-0.0478942	0.000737388	0.00630929	10.398	-0.512209	0.584125	0.797943	0.0288648	6.98362e-09	0.553459	0.765397	0.136072	3.41828e-07	0.782272	0.914268	0.13612
796	stearoyl-arachidonoyl-glycerol (18:0/20:4) [2]*	1345	TRUE	-0.652222	0.129063	0.158788	-0.0669833	0.134954	0.0035375	0.0147756	-3.57507	2.33444	0.000274037	0.116818	0.0291834	0.244295	0.114464	0.175975	0.000967304	0.0974761	0.233787	0.393862	0.136902
535	1-oleoyl-GPI (18:1)	1345	TRUE	-0.0962351	-0.0786092	0.150512	-0.0284941	-0.299244	0.0159973	-0.0224001	2.02972	5.32171	0.572141	0.314879	0.0296147	0.602273	0.000230828	1.20244e-10	1.41174e-07	0.32219	0.00429123	0.624185	0.137648
418	1-palmityl-2-linoleoyl-GPC (O-16:0/18:2)*	1345	TRUE	1.44038	-0.19692	0.143025	0.0292689	-0.583118	-0.00299295	-0.0439373	-5.30204	0.427191	6.07265e-19	0.00811149	0.0297429	0.573512	4.49221e-14	0.205243	1.85467e-27	0.00654332	0.809504	0.114983	0.137648
411	isobutyrylglycine	1345	TRUE	0.148463	-0.175284	0.149502	-0.0263443	-0.103326	0.00949913	-0.0200181	8.22466	0.00972096	0.380838	0.0242229	0.0298033	0.628022	0.201005	0.000120627	2.24206e-06	5.48608e-05	0.995814	0.203935	0.137648
434	phosphatidylcholine (15:0/18:1, 17:0/16:1, 16:0/17:1)*	1345	TRUE	-0.442066	0.0899821	0.147449	-0.253137	-0.0838818	0.010043	0.00279355	8.69333	-1.32181	0.00825823	0.241596	0.03008	2.44763e-06	0.293376	3.87786e-05	0.504018	1.58996e-05	0.470272	0.549415	0.138214
816	ceramide (d18:1/20:0, d16:1/22:0, d20:1/18:0)*	1345	TRUE	-1.48308	-0.057221	0.156777	0.0938066	0.0365196	0.0133205	0.026785	-0.484491	-3.60065	8.49508e-17	0.484227	0.0302778	0.10091	0.667391	2.95028e-07	1.76313e-09	0.821243	0.064658	0.754425	0.138413
785	N-acetylleucine	1345	TRUE	-1.57426	0.0386496	0.147803	0.536198	0.135094	0.0110327	0.0297597	3.41222	3.52919	1.06882e-20	0.617884	0.031052	4.1595e-23	0.093274	7.35886e-06	1.66823e-12	0.0929345	0.0558761	0.83629	0.140889
568	isovalerylglycine	1345	TRUE	0.176969	-0.276886	0.146042	0.0474429	-0.0149298	0.0110562	-0.0245079	9.16706	2.31819	0.288763	0.000300209	0.0311339	0.375568	0.851167	5.50502e-06	4.07507e-09	4.9735e-06	0.203926	0.0168117	0.140889
553	argininate*	1345	TRUE	-0.727721	-0.131117	0.145448	0.452178	0.111472	0.00153752	0.0171898	3.72171	1.82856	1.29222e-05	0.086978	0.0318609	3.07692e-17	0.161323	0.527482	3.72069e-05	0.0638369	0.316388	0.344833	0.143454
663	lactosyl-N-palmitoyl-sphingosine (d18:1/16:0)	1345	TRUE	1.16931	0.201631	-0.143832	-0.0558218	-0.615502	-0.0111322	-0.0186689	9.88926	-0.539673	1.52158e-12	0.00790121	0.0322059	0.292812	5.95332e-15	3.8932e-06	6.17535e-06	6.69678e-07	0.765381	0.114983	0.143996
26	3-methylglutaconate	1345	TRUE	0.0019592	0.0547663	0.144618	-0.242004	0.660357	0.00606425	-0.0131551	11.2179	1.13114	0.990602	0.473274	0.0323026	5.80741e-06	8.53719e-17	0.0124184	0.00154466	2.09551e-08	0.534114	0.747779	0.143996
867	X - 24307	1345	TRUE	-0.0729344	0.0178054	-0.155609	-0.0489796	-0.0266673	-0.00238168	0.00705207	-7.87194	2.30163	0.683937	0.828626	0.0324844	0.394327	0.754995	0.362004	0.115086	0.000261396	0.240192	0.927947	0.144089
415	sphingomyelin (d18:1/24:1, d18:2/24:0)*	1345	TRUE	-0.0841803	-0.0254966	0.149395	-0.125489	-0.673799	0.0159138	-0.0200941	-0.60691	0.900042	0.625457	0.747441	0.0329412	0.023379	2.58479e-16	2.4915e-10	3.09512e-06	0.769972	0.633264	0.891619	0.145173
865	1-(1-enyl-palmitoyl)-2-palmitoyl-GPC (P-16:0/16:0)*	1345	TRUE	1.33234	-0.126071	0.143261	0.00881237	-0.625285	0.000455784	-0.0451573	1.88843	5.7024	8.18697e-16	0.0970435	0.0330527	0.868218	2.33894e-15	0.8502	8.83701e-28	0.343024	0.00163032	0.361382	0.145173
769	X - 13729	1345	TRUE	-0.819425	-0.0439753	0.14943	-0.0751377	0.0418842	0.0161416	0.000490359	9.6374	3.56266	2.12224e-06	0.579432	0.0332744	0.175543	0.611386	1.50946e-10	0.909568	3.5963e-06	0.0594778	0.813233	0.145433
300	X - 15492	1345	TRUE	-1.9759	-0.0795459	0.133405	0.731472	0.0235452	0.0137341	0.0378884	1.33888	-2.42862	2.01159e-37	0.262303	0.0335836	3.29045e-49	0.749442	1.10753e-09	9.87335e-23	0.471669	0.150846	0.56769	0.146072
452	gluconate	1345	TRUE	-1.18569	-0.112283	0.140535	-0.461616	-0.115871	0.0173394	0.0192411	5.71467	0.74391	4.69239e-13	0.135684	0.0347776	1.71188e-18	0.138319	4.05009e-13	2.6105e-06	0.00376837	0.678191	0.420779	0.150535
230	linolenate [alpha or gamma; (18:3n3 or 6)]	1345	TRUE	-0.0986985	0.151458	-0.143531	-0.477639	-0.0857268	0.00501255	0.00136934	-3.66705	-1.05138	0.559093	0.0508724	0.036475	1.26911e-18	0.287426	0.0419118	0.745592	0.0713172	0.569403	0.285119	0.157123
806	stearoyl-arachidonoyl-glycerol (18:0/20:4) [1]*	1345	TRUE	-0.355231	0.166167	0.150237	-0.014874	0.394714	0.00357643	0.00347746	5.22858	5.75248	0.0455187	0.0416005	0.0373129	0.794174	3.18297e-06	0.167405	0.433219	0.0144556	0.00306957	0.264355	0.159964
234	sphingomyelin (d18:1/14:0, d16:1/16:0)*	1345	TRUE	-1.21626	-0.0836989	0.138998	-0.268342	-0.500682	0.0191873	0.0166009	5.94678	-0.820718	1.45586e-13	0.267937	0.0375623	3.7595e-07	1.78459e-10	1.29355e-15	5.38009e-05	0.0026761	0.648415	0.574333	0.160266
482	gamma-glutamylglutamine	1345	TRUE	0.538511	0.0302673	-0.131519	0.170163	-0.152211	0.00656583	-0.0323343	3.92832	-1.93835	0.000565068	0.672965	0.0381587	0.000687556	0.0410406	0.00394466	1.15712e-16	0.0366355	0.256545	0.860956	0.162039
379	pregnanediol-3-glucuronide	1345	TRUE	1.90531	0.322904	-0.132608	-0.44952	-0.129088	-0.0248189	-0.0196869	7.84449	3.62234	2.52224e-33	8.99565e-06	0.039293	9.41063e-19	0.0875403	6.34221e-27	6.51405e-07	3.87506e-05	0.0365577	0.00138216	0.165296
195	N-acetyl-beta-alanine	1345	TRUE	-0.330287	-0.160407	0.142146	0.518037	0.146472	0.00285919	0.000343272	0.264508	-2.57996	0.0517505	0.0396265	0.0392948	1.98463e-21	0.0705257	0.248235	0.935497	0.897012	0.164794	0.259163	0.165296
192	succinylcarnitine (C4-DC)	1345	TRUE	-1.71385	-0.0165411	-0.127758	0.525421	0.160613	0.0148918	0.0293532	4.68609	-0.18293	9.49168e-29	0.815094	0.0411782	2.24618e-26	0.0288351	3.39481e-11	2.39392e-14	0.0114903	0.913553	0.925145	0.17241
864	cystine	1345	TRUE	-1.48573	0.0222099	0.136751	0.21369	0.109414	0.0142306	0.0262989	0.213794	-0.128273	2.52693e-19	0.769804	0.0416813	5.63552e-05	0.165253	3.57332e-09	1.90771e-10	0.914425	0.943445	0.89982	0.173704
261	N-acetyltryptophan	1345	TRUE	-1.17816	-0.0155296	0.131945	0.685359	0.0294386	0.00819158	0.018927	-0.208491	-6.25832	2.06567e-13	0.833	0.0428606	1.9804e-40	0.700428	0.000462581	2.32092e-06	0.914002	0.00036145	0.930633	0.177792
211	ribitol	1345	TRUE	-1.70938	0.118063	0.131942	0.11487	0.214663	0.00550907	0.0475262	-3.8347	-1.99954	2.87999e-26	0.110697	0.0439071	0.0264163	0.00524526	0.0191192	3.83917e-32	0.0481104	0.256828	0.38896	0.181294
368	histidine	1345	TRUE	0.98252	0.0674062	-0.127313	-0.133746	-0.0755663	-0.00629562	-0.0191551	1.05455	1.02476	3.29955e-10	0.347732	0.0449918	0.00769376	0.310938	0.00576235	9.37285e-07	0.575199	0.549039	0.653182	0.184921
460	X - 21736	1345	TRUE	-1.53105	-0.164672	0.138215	-0.00778007	0.0230302	0.0191898	0.0221091	-4.13968	-1.42607	2.26919e-19	0.0350127	0.0454793	0.886698	0.776561	1.03829e-14	1.96771e-07	0.0431971	0.443473	0.247636	0.186071
142	X - 22776	1345	TRUE	0.112817	-0.104107	0.148968	-0.252685	-0.100217	-0.003411	0.00626883	-4.80734	-1.31143	0.539407	0.217392	0.0460286	1.84594e-05	0.253061	0.203252	0.172209	0.0297887	0.514264	0.515141	0.186387
200	fructose	1345	TRUE	-0.531739	0.0112204	0.138832	-0.0414961	-0.000216608	0.00717521	0.00451619	2.52251	2.26725	0.00192323	0.886638	0.0461645	0.450732	0.997886	0.00410412	0.2916	0.221466	0.22661	0.95599	0.186387
327	glucuronate	1345	TRUE	-1.13679	-0.0550476	0.146265	0.152141	0.0975237	0.0109578	0.0173052	2.57311	1.88431	3.09613e-10	0.50681	0.0461807	0.00867866	0.257638	3.18199e-05	0.000125331	0.236532	0.340197	0.764481	0.186387
448	1-palmitoleoyl-GPC (16:1)*	1345	TRUE	0.0301415	0.0602249	0.136706	-0.0150942	-0.0493214	0.00508019	-0.0102574	11.8946	-4.04937	0.85849	0.43779	0.0464901	0.780865	0.540765	0.0393423	0.0151429	5.03034e-09	0.0285328	0.735947	0.186794
462	p-cresol glucuronide*	1345	TRUE	-0.317009	0.0386701	0.136035	-0.214874	0.204954	0.0157096	-0.0148075	8.85277	-0.930104	0.061553	0.619397	0.0482539	7.87572e-05	0.0112773	2.11691e-10	0.000472775	1.43864e-05	0.616044	0.837074	0.19279
877	kynurenine	1345	TRUE	-1.86242	-0.0369144	0.132052	0.465618	-0.059772	0.012846	0.0365169	10.9582	-2.69901	1.21758e-29	0.625471	0.0484126	1.28276e-18	0.446802	8.91586e-08	7.01592e-19	3.24633e-08	0.134131	0.837978	0.19279
449	1-carboxyethylleucine	1345	TRUE	-2.0258	-0.0687917	0.122904	0.658907	0.309663	0.00861732	0.0472953	-3.88973	-2.01578	9.34478e-40	0.32909	0.0487287	8.79631e-41	2.35054e-05	0.00011869	6.07223e-35	0.0352774	0.229991	0.641097	0.193127
472	palmitoleoyl-arachidonoyl-glycerol (16:1/20:4) [2]*	1345	TRUE	-0.951805	0.00570587	-0.136286	0.0978058	0.374862	-0.00142758	0.0347165	2.96562	0.987416	2.32395e-08	0.941857	0.0489285	0.0737068	3.98235e-06	0.565633	3.45616e-16	0.148137	0.596255	0.979188	0.193127
329	cyclo(ala-pro)	1345	TRUE	-0.52218	-0.268942	0.140363	0.385624	0.0533264	0.00560174	0.0043367	-0.440816	-0.69747	0.00320699	0.000946129	0.0511268	1.19208e-11	0.528048	0.0301656	0.327175	0.836227	0.718932	0.0368579	0.200919
85	1-carboxyethylphenylalanine	1345	TRUE	-2.35921	-0.100441	0.120493	0.456655	0.357135	0.0123877	0.054583	-5.10696	-2.0058	1.10722e-53	0.152612	0.0524259	1.36905e-20	9.80783e-07	2.79521e-08	2.65723e-46	0.00553005	0.230539	0.440141	0.205125
480	nonanoylcarnitine (C9)	1345	TRUE	-0.112388	0.0516311	-0.141615	0.153626	0.0413771	0.00794472	-0.0111101	-2.93086	3.34471	0.535147	0.534902	0.0543649	0.00826004	0.632167	0.00264634	0.01412	0.179019	0.0915372	0.781847	0.211787
334	1-stearoyl-2-oleoyl-GPE (18:0/18:1)	1345	TRUE	-0.652943	0.0639518	0.137239	-0.0723494	0.24073	0.000467204	0.0228358	-1.70371	-1.1222	0.000208225	0.428831	0.0549552	0.200398	0.00414746	0.855606	2.07435e-07	0.42135	0.560059	0.727713	0.21316
623	tetradecadienedioate (C14:2-DC)*	1345	TRUE	-0.526697	0.0790158	0.138454	-0.21859	-0.133995	0.00537224	0.0115468	4.78058	-1.64375	0.00312405	0.334221	0.0557961	0.000132703	0.114974	0.0387414	0.00949834	0.0258311	0.399121	0.645392	0.215488
317	N-delta-acetylornithine	1345	TRUE	0.389596	-0.00407628	0.12954	0.132117	-0.0094152	0.0123055	-0.0366196	-2.34814	-3.37389	0.0201994	0.957788	0.0572591	0.0141266	0.906324	4.89671e-07	2.34406e-18	0.244772	0.065935	0.980911	0.219596
628	lignoceroylcarnitine (C24)*	1345	TRUE	-0.629674	0.0275457	0.134076	0.269954	-0.216485	0.0147974	-0.00581123	-5.09951	-5.16384	0.000288358	0.729759	0.0573499	1.27979e-06	0.0089688	5.15152e-09	0.180423	0.0147009	0.00656328	0.887082	0.219596
773	ceramide (d18:1/14:0, d16:1/16:0)*	1345	TRUE	-1.47306	0.141684	0.127575	-0.0759143	-0.0690338	0.0125258	0.0312899	6.38739	-6.12809	5.87316e-19	0.0624161	0.0578949	0.153245	0.38218	2.14802e-07	3.93328e-14	0.00135277	0.000717465	0.304607	0.220393
193	oleoyl-linoleoyl-glycerol (18:1/18:2) [2]	1345	TRUE	-1.24636	0.0188647	-0.131207	0.294715	0.0907309	0.000896195	0.0412194	-2.86656	-7.48633	2.71522e-13	0.809622	0.0582199	7.2869e-08	0.264721	0.718614	3.85447e-22	0.162557	5.99574e-05	0.922928	0.220393
577	1-oleoyl-GPE (18:1)	1345	TRUE	0.680223	-0.044058	0.130881	0.176619	0.0759741	0.0021554	-0.0303348	6.87529	-0.814085	6.41236e-05	0.572835	0.0582958	0.0012224	0.349297	0.385137	9.62892e-13	0.00078842	0.661865	0.81212	0.220393
732	glycosyl ceramide (d18:2/24:1, d18:1/24:2)*	1345	TRUE	0.418436	-0.0248334	0.131415	-0.22698	-0.653728	0.00902258	-0.0254186	-2.92818	0.213971	0.0146243	0.752303	0.0590445	3.68335e-05	1.27448e-15	0.000306251	2.89695e-09	0.155711	0.909125	0.891619	0.222285
533	1-(1-enyl-oleoyl)-2-docosahexaenoyl-GPE (P-18:1/22:6)*	1345	TRUE	0.821463	-0.336167	0.12555	0.0213557	-0.0273835	0.0149423	-0.053607	-10.8693	2.72544	6.54281e-07	9.25554e-06	0.0612316	0.687001	0.728103	5.48544e-10	1.30281e-38	4.52661e-08	0.131333	0.00138216	0.228835
650	myo-inositol	1345	TRUE	-0.593135	-0.159292	0.126102	0.0770108	-0.0299045	0.0245286	-0.0226392	3.77096	2.74829	0.000349952	0.0365032	0.0612951	0.148096	0.705503	3.74481e-24	4.6881e-08	0.0589429	0.129902	0.247779	0.228835
111	hydantoin-5-propionate	1345	TRUE	-1.99217	0.0925921	0.123922	0.361751	0.0124236	0.0108511	0.0461577	4.08097	0.0228588	2.99897e-34	0.21671	0.0616436	5.05448e-12	0.873241	5.17216e-06	1.06394e-29	0.0377976	0.989786	0.515044	0.229181
695	X - 24455	1345	TRUE	0.0113169	-0.00309694	0.139796	0.164658	-0.0334218	-7.75038e-05	-0.00456692	4.1947	0.56357	0.951082	0.970831	0.0620717	0.00541751	0.704063	0.977017	0.321651	0.0588381	0.780009	0.98401	0.229819
465	fumarate	1345	TRUE	-0.221603	0.0183641	0.130052	0.102763	-0.00755426	0.0151037	-0.0220631	1.96597	1.13619	0.198529	0.816482	0.0632038	0.0632123	0.926785	1.867e-09	2.98293e-07	0.343245	0.546718	0.925145	0.233048
208	5-oxoproline	1345	TRUE	-0.00612893	0.0694624	-0.118008	0.529603	-0.0380153	0.0120813	-0.0243371	1.19765	-2.89663	0.96878	0.333979	0.0635519	5.82456e-26	0.610791	1.22253e-07	4.92733e-10	0.525127	0.0908215	0.645392	0.233371
437	sphingosine	1345	TRUE	-0.502016	0.32504	-0.123585	0.102093	-0.0946835	-0.00280976	0.0212761	4.02258	-1.71718	0.00226188	1.66133e-05	0.0642139	0.0530166	0.227279	0.241245	2.21247e-07	0.042056	0.339634	0.0018607	0.234839
485	homocitrulline	1345	TRUE	-0.0142829	-0.138131	0.13545	0.028637	0.25023	0.00773087	-0.0138529	2.98591	0.113227	0.937186	0.0969147	0.0657687	0.622505	0.00379686	0.00344572	0.00221492	0.171032	0.954453	0.361382	0.239548
689	5,6-dihydrouridine	1345	TRUE	-1.34959	-0.0643788	0.119752	0.0712568	0.0843066	0.0144072	0.0209635	17.0335	0.0932866	5.22896e-17	0.383851	0.0671002	0.167958	0.272346	8.50275e-10	1.87053e-07	1.50152e-18	0.957759	0.681051	0.243408
854	1-(1-enyl-stearoyl)-2-docosahexaenoyl-GPC (P-18:0/22:6)*	1345	TRUE	0.913219	-0.150359	0.119243	-0.0408398	-0.131684	0.0160904	-0.0575952	-9.70079	5.22586	1.40619e-08	0.0419241	0.0682116	0.429291	0.0863631	7.20815e-12	1.59831e-46	5.53379e-07	0.00300013	0.264535	0.245525
80	X - 12906	1345	TRUE	-0.504136	-0.133366	0.122615	0.235624	-0.0211661	0.0251568	-0.0277508	5.22411	6.9578	0.00232536	0.0793268	0.0682318	9.22972e-06	0.788667	2.0161e-25	1.94155e-11	0.0087429	0.000121873	0.332016	0.245525
702	1-docosahexaenoyl-GPE (22:6)*	1345	TRUE	0.224129	-0.0109291	0.122238	-0.104651	0.222822	0.0196731	-0.0402353	-4.29075	0.186185	0.175305	0.88554	0.0687722	0.0486371	0.004729	3.41839e-16	2.03283e-22	0.0310898	0.918016	0.955957	0.246479
446	palmitoyl-sphingosine-phosphoethanolamine (d18:1/16:0)	1345	TRUE	0.161763	-0.222126	0.125378	-0.0794692	-0.609614	0.0134445	-0.0248918	-1.11406	1.3894	0.341451	0.00443889	0.0694778	0.145363	5.64616e-14	5.91107e-08	4.62884e-09	0.58619	0.455063	0.0911628	0.248016
857	X - 12007	1345	TRUE	-1.0806	-0.17716	0.125595	0.290865	0.0157114	0.016816	0.00531587	2.00047	3.68977	2.80861e-10	0.0242696	0.071023	1.21608e-07	0.847499	1.67218e-11	0.214078	0.331825	0.0488991	0.203935	0.251922
779	9-hydroxystearate	1345	TRUE	0.417327	0.112919	0.11688	-0.856965	-0.120449	-0.00293651	0.00033787	5.50871	-2.3108	0.00886604	0.122978	0.0711342	6.19604e-63	0.113278	0.206674	0.932403	0.0040988	0.185213	0.400717	0.251922
341	X - 11299	1345	TRUE	0.283504	-0.113635	-0.12335	0.0669648	-0.0379665	0.00650155	-0.0196945	8.7606	6.06088	0.0930283	0.142553	0.0719825	0.216415	0.637229	0.00826046	2.99818e-06	1.61376e-05	0.00102773	0.43006	0.253923
16	X - 16570	1345	TRUE	-0.608903	-0.26853	0.122637	-0.195517	-0.0372436	0.0101348	0.0084747	7.31636	-3.70711	0.000301284	0.000517427	0.0731103	0.000299422	0.643036	3.70926e-05	0.0440431	0.000308206	0.044256	0.0245416	0.256165
715	allantoin	1345	TRUE	-0.860231	0.023603	0.124994	0.460668	-0.0869769	0.0121601	0.00257972	3.86266	-1.06001	5.4921e-07	0.76471	0.0731899	6.46845e-17	0.288405	1.20708e-06	0.54768	0.061686	0.572612	0.898008	0.256165
853	oleoyl-linoleoyl-glycerol (18:1/18:2) [1]	1345	TRUE	-1.19695	0.0184703	-0.123329	0.359016	0.07846	0.00132021	0.0374861	-3.39529	-7.38878	1.84381e-12	0.812805	0.0738821	4.56369e-11	0.332909	0.594116	1.01564e-18	0.0967861	6.99882e-05	0.925145	0.257581
618	1-eicosapentaenoyl-GPC (20:5)*	1345	TRUE	-0.129971	-0.14203	0.120296	0.213501	0.139537	0.0214927	-0.0354747	6.59332	2.88902	0.43352	0.0623088	0.074315	6.11296e-05	0.0779368	6.65128e-19	1.15515e-17	0.000962888	0.111485	0.304607	0.258086
204	1-margaroyl-2-oleoyl-GPC (17:0/18:1)*	1345	TRUE	-0.116448	0.0632699	0.124403	-0.158081	-0.105037	0.0185609	-0.0244376	-0.634186	0.880488	0.500117	0.424883	0.0761362	0.0043434	0.202255	1.70854e-13	1.47176e-08	0.760266	0.641125	0.723754	0.26339
302	gamma-glutamylvaline	1345	TRUE	-2.09113	-0.221416	0.108676	0.696723	0.201785	0.0114843	0.0439844	-11.9739	-2.80434	1.69329e-43	0.00142591	0.0768128	9.73823e-47	0.0051461	1.91001e-07	2.44389e-31	4.71482e-11	0.0899715	0.0456292	0.263914
260	1-stearoyl-2-linoleoyl-GPC (18:0/18:2)*	1345	TRUE	0.00933812	-0.12742	0.126841	-0.212449	-0.665136	0.0128345	-0.0156832	-1.77272	-4.43635	0.957811	0.1159	0.0768767	0.000176928	2.7958e-15	6.17679e-07	0.000375587	0.404039	0.0215811	0.393862	0.263914
220	1-stearoyl-2-linoleoyl-GPE (18:0/18:2)*	1345	TRUE	-0.603797	0.00413169	0.12553	-0.234764	0.0502207	0.00245776	0.0208291	-2.7671	-6.49369	0.000564747	0.959015	0.0775841	2.95383e-05	0.547674	0.335855	1.92105e-06	0.189201	0.000698446	0.980911	0.265326
103	1-stearoyl-2-arachidonoyl-GPI (18:0/20:4)	1345	TRUE	-0.849356	0.041979	0.125981	-0.100023	-0.132179	0.01234	0.011397	-1.13755	-3.39359	1.4169e-06	0.603655	0.0782185	0.0768109	0.115618	1.55203e-06	0.00958315	0.591496	0.0781367	0.825763	0.266478
744	1-arachidoyl-2-arachidonoyl-GPC (20:0/20:4)*	1345	TRUE	0.468814	0.0786151	0.123767	-0.08923	-0.151264	0.00603477	-0.0256611	2.3534	2.28629	0.00724179	0.326666	0.0808957	0.11126	0.0692787	0.0177688	3.99408e-09	0.262659	0.231177	0.639862	0.274555
320	taurine	1345	TRUE	0.291209	0.205395	-0.122339	-0.146578	-0.0603697	-0.00217097	-0.00742846	4.475	-0.375349	0.0926029	0.00977577	0.0819433	0.00835065	0.464807	0.389937	0.0859015	0.0317608	0.842901	0.12513	0.276542
333	S-methylcysteine	1345	TRUE	0.993835	0.148382	-0.118814	-0.0784407	-0.117071	0.00130906	-0.034023	1.32494	0.517625	3.48369e-09	0.0547446	0.0820983	0.14633	0.144618	0.593677	5.71613e-16	0.512903	0.778503	0.29579	0.276542
574	N-acetylcarnosine	1345	TRUE	-0.385448	-0.106136	-0.0931785	1.20557	0.0403952	-0.00537258	0.00758844	-2.31505	1.03234	0.00352337	0.0801142	0.082445	7.36982e-178	0.521446	0.00528908	0.021466	0.145339	0.47493	0.332016	0.276648
53	1-margaroyl-2-arachidonoyl-GPC (17:0/20:4)*	1345	TRUE	0.0456944	0.114115	-0.121898	0.0543985	0.564407	-0.000182069	-0.00539877	3.60544	9.75562	0.791774	0.150992	0.0829247	0.327452	8.10841e-12	0.942497	0.211781	0.0834804	2.56277e-07	0.438046	0.276648
746	N-behenoyl-sphingadienine (d18:2/22:0)*	1345	TRUE	-1.07259	-0.147419	0.128075	0.0108069	-0.172397	0.0134358	0.0152321	-5.39941	-3.09182	3.73152e-09	0.0775792	0.083056	0.853167	0.046959	4.10441e-07	0.000803233	0.0136636	0.120254	0.332016	0.276648
276	octanoylcarnitine (C8)	1345	TRUE	-0.0378069	0.05016	-0.121166	0.0175546	-0.00406355	0.00779579	-0.0107547	-9.71654	2.64885	0.826518	0.526512	0.0837482	0.75119	0.960611	0.00194259	0.0125671	2.86568e-06	0.160361	0.773491	0.27749
755	1-pentadecanoyl-GPC (15:0)*	1345	TRUE	0.317445	0.153014	-0.115805	0.189858	-0.271487	0.00480088	-0.021303	10.5494	-3.4209	0.0543135	0.0433553	0.0839284	0.000335942	0.000560001	0.0459817	2.34652e-07	1.07509e-07	0.0579782	0.269766	0.27749
495	dodecadienoate (12:2)*	1345	TRUE	0.0045407	0.126057	-0.122716	-0.0451403	-0.129304	0.00119742	-0.00102986	-12.2753	-1.92495	0.979384	0.11816	0.0855352	0.423468	0.122884	0.640299	0.814499	6.45148e-09	0.316562	0.393862	0.281715
492	N,N,N-trimethyl-5-aminovalerate	1345	TRUE	-1.31778	-0.0258289	0.118584	-0.0518285	0.307127	0.0142505	0.0205084	-0.660107	-1.40395	8.93846e-15	0.740643	0.0858349	0.342049	0.000151551	8.95746e-09	1.36198e-06	0.746913	0.450129	0.891026	0.281715
318	3beta-hydroxy-5-cholestenoate	1345	TRUE	1.29537	0.0525443	-0.109718	0.397666	-0.0479363	0.00153278	-0.0537482	5.73329	5.45676	2.07052e-16	0.46781	0.0865813	3.82935e-15	0.523752	0.504912	2.01551e-42	0.00250972	0.00155135	0.747161	0.283127
398	hexadecanedioate (C16-DC)	1345	TRUE	0.0303782	0.0586981	0.121479	-0.0210532	-0.0426419	0.00709093	-0.0142682	5.68912	-0.0422944	0.862281	0.465354	0.0876589	0.707976	0.609701	0.00549433	0.00110765	0.00694807	0.982384	0.746519	0.28553
830	tyramine O-sulfate	1345	TRUE	-0.90345	-0.150605	0.119671	0.0880952	0.255369	0.00764721	0.0160147	-2.29288	0.10228	1.69369e-07	0.0575682	0.0880746	0.112065	0.00193935	0.00240045	0.000206148	0.27007	0.95683	0.304607	0.28553
586	pyridoxate	1345	TRUE	-0.0917947	-0.142233	0.117223	0.332099	0.129589	0.0160079	-0.0280379	7.79644	3.23087	0.587704	0.0672911	0.088272	9.87714e-10	0.108573	8.98608e-11	3.37416e-11	0.000130188	0.0810579	0.309194	0.28553
660	kynurenate	1345	TRUE	-1.41104	-0.110642	0.112664	0.605509	-0.100921	0.0073995	0.0296244	4.06878	-1.46011	8.06932e-18	0.141964	0.0909692	1.37338e-30	0.197281	0.0019888	4.94791e-13	0.0393844	0.415959	0.43006	0.293196
210	2,3-dihydroxyisovalerate	1345	TRUE	-0.241134	-0.0810023	0.116596	0.203582	0.147551	0.0142245	-0.0187305	7.07196	4.30212	0.157329	0.300833	0.092288	0.000199367	0.0696608	1.06518e-08	1.09651e-05	0.000569028	0.0210794	0.610325	0.295205
588	pregnenediol sulfate (C21H34O5S)*	1345	TRUE	1.56198	0.120717	-0.0961842	0.787119	-0.327375	-0.0305069	-0.0128518	-1.63996	-1.34025	1.2287e-28	0.0616524	0.092353	4.81643e-68	1.07051e-06	5.31799e-50	0.000255496	0.332796	0.383816	0.304607	0.295205
150	1-(1-enyl-palmitoyl)-2-myristoyl-GPC (P-16:0/14:0)*	1345	TRUE	1.00542	-0.0627385	0.116722	-0.199048	-0.455799	0.00139214	-0.0334677	8.51924	6.92333	4.08842e-09	0.424153	0.0928036	0.000286385	2.28266e-08	0.576621	4.64727e-15	3.47059e-05	0.00021386	0.723754	0.295205
424	X - 16580	1345	TRUE	-1.05052	-0.109261	0.113687	0.229721	-0.0493159	0.0190894	0.00137665	-1.59251	-1.03986	2.88887e-10	0.153235	0.0929997	1.74317e-05	0.534934	3.97849e-15	0.740845	0.42713	0.568312	0.440141	0.295205
583	trimethylamine N-oxide	1345	TRUE	-1.11815	-0.210016	0.11649	0.171941	0.0887162	0.0209128	0.00149847	8.17654	1.03372	5.98166e-11	0.00742421	0.0932401	0.00171625	0.276345	4.75e-17	0.725528	7.00176e-05	0.580183	0.114983	0.295205
130	xanthurenate	1345	TRUE	-0.416625	-0.00892119	0.114217	0.491311	-0.0232235	-0.0100559	0.0238935	4.37339	-1.56694	0.0132212	0.908002	0.0944505	8.71712e-20	0.772154	4.11727e-05	1.28183e-08	0.030687	0.394233	0.960507	0.297483
79	retinol (Vitamin A)	1345	TRUE	-0.403003	-0.0574942	0.112053	0.577199	0.158869	0.00913061	-0.00756287	3.95404	-2.15351	0.0146165	0.448016	0.0946236	1.20219e-27	0.0435883	0.000148616	0.0666027	0.0465282	0.232918	0.736031	0.297483
526	N1-methylinosine	1345	TRUE	-2.23397	-0.0774023	0.110492	0.419781	-0.0354152	0.0188896	0.0404071	5.38277	0.181577	1.41615e-42	0.30205	0.0958518	1.17818e-15	0.649449	2.2044e-15	4.06806e-23	0.00618225	0.919056	0.610325	0.300291
343	gamma-glutamyl-epsilon-lysine	1345	TRUE	-0.420525	-0.100793	-0.12022	0.106213	0.0556804	0.00147875	0.0108978	3.02001	-5.57991	0.0187224	0.219697	0.0979765	0.0642977	0.514001	0.570795	0.0147292	0.160657	0.00434479	0.515141	0.305878
14	1-palmitoyl-2-docosahexaenoyl-GPE (16:0/22:6)*	1345	TRUE	0.143158	0.0216008	0.113977	-0.360622	0.439032	0.00969528	-0.0180692	-4.84318	-0.413708	0.400342	0.782247	0.0992461	4.08998e-11	6.39926e-08	9.40169e-05	2.14338e-05	0.0180749	0.824161	0.904379	0.308766
335	ectoine	1345	TRUE	-0.0689107	-0.126634	0.11641	0.269492	0.036403	0.00192793	-0.00552828	4.65584	4.07828	0.692507	0.113464	0.100028	1.44641e-06	0.661409	0.448068	0.204085	0.0264188	0.032383	0.393862	0.30967
363	theobromine	1345	TRUE	-0.135693	-0.12161	-0.112893	-0.133903	-0.146444	0.00177045	0.00724949	7.46341	-1.29684	0.422454	0.117385	0.100362	0.0136497	0.0695241	0.472959	0.0862325	0.00024638	0.48337	0.393862	0.30967
144	X - 21607	1345	TRUE	0.185136	-0.0534952	-0.116589	0.0952439	-0.196817	0.00478561	-0.0138054	-7.31189	2.19135	0.289934	0.505397	0.100844	0.0898331	0.018342	0.0606894	0.00158281	0.000515078	0.252137	0.763636	0.30967
812	mannitol/sorbitol	1345	TRUE	-1.20238	-0.0972627	0.108138	0.0871852	0.291467	0.0164886	0.0119258	3.76654	1.67394	1.27782e-13	0.191801	0.100919	0.0941851	0.000166523	3.25409e-12	0.00326573	0.0538189	0.345716	0.492416	0.30967
894	tetradecanedioate (C14-DC)	1345	TRUE	-0.124197	0.126745	0.11644	-0.0272174	-0.014184	0.0057134	-0.00612732	1.58173	-3.80274	0.478948	0.115559	0.102213	0.6288	0.86539	0.0255292	0.162031	0.453738	0.0474957	0.393862	0.312568
564	1-linoleoyl-GPI (18:2)*	1345	TRUE	-0.702741	-0.186083	0.114723	-0.108434	-0.355988	0.0119893	0.00674914	-3.38332	0.595879	4.88812e-05	0.0191761	0.10264	0.0509014	1.61198e-05	2.02749e-06	0.118459	0.104272	0.752909	0.177132	0.312809
170	X - 24556	1345	TRUE	-0.188286	0.00408244	0.111678	0.324575	-0.0234678	0.0151484	-0.0242548	2.22539	-1.13994	0.26639	0.958141	0.104592	2.38168e-09	0.771495	8.7118e-10	9.96199e-09	0.275069	0.538442	0.980911	0.317675
817	benzoate	1345	TRUE	-0.331771	0.00345636	-0.115513	-0.205924	-0.0381499	-0.00107899	0.0142631	-0.382706	-0.1939	0.060284	0.965997	0.107305	0.000279969	0.650615	0.675244	0.00122394	0.857101	0.920041	0.982602	0.324626
291	acetylcarnitine (C2)	1345	TRUE	-0.869404	0.00257838	0.115564	0.111581	-0.0492992	0.0155532	0.00191963	-6.91683	-3.89721	9.02691e-07	0.97469	0.107966	0.04952	0.559278	1.68955e-09	0.664183	0.00116678	0.0441243	0.984579	0.324626
397	glycosyl-N-palmitoyl-sphingosine (d18:1/16:0)	1345	TRUE	-0.0568354	-0.0634042	0.114193	0.015341	-0.638279	0.00632831	-0.00684761	0.923121	3.50939	0.74522	0.429787	0.107967	0.78464	1.99888e-14	0.0131035	0.117057	0.661003	0.0666019	0.727958	0.324626
486	X - 23678	1345	TRUE	-0.457629	0.00278521	0.1113	0.0266789	-0.21048	0.0141506	-0.00716464	-3.74504	1.43157	0.0082833	0.97208	0.113884	0.631524	0.0108989	2.16572e-08	0.0979717	0.0726035	0.450186	0.984162	0.34044
664	1-stearyl-2-docosapentaenoyl-GPC (O-18:0/22:5n3)*	1345	TRUE	0.971636	0.104138	-0.109109	0.100744	-0.29584	-0.00827873	-0.0205666	8.28922	2.32375	1.08535e-08	0.182027	0.113987	0.064772	0.000263014	0.00083774	1.27164e-06	5.07004e-05	0.211314	0.471056	0.34044
892	3-hydroxyhexanoate	1345	TRUE	-0.375275	0.0715313	0.111143	0.120434	-0.0577209	0.00976491	-0.0049457	-7.10606	-1.10354	0.0312791	0.371295	0.116357	0.0312964	0.487416	0.000121855	0.255903	0.000703506	0.562624	0.669377	0.346365
883	linoleoyl-arachidonoyl-glycerol (18:2/20:4) [1]*	1345	TRUE	-1.27099	0.0227059	-0.104774	0.269364	0.359248	-0.00520755	0.0501171	-2.31207	3.09765	1.26029e-14	0.764183	0.117642	3.56328e-07	4.9081e-06	0.0303075	4.49208e-34	0.243888	0.0858213	0.898008	0.349031
308	androstenediol (3beta,17beta) monosulfate (2)	1345	TRUE	0.978707	0.0406014	0.106752	-0.0832052	0.0485523	-0.0278104	0.0136325	-2.43425	-5.65401	7.08902e-09	0.600936	0.120056	0.125189	0.547133	1.66288e-29	0.00124718	0.231573	0.00223287	0.823301	0.353612
348	N2,N2-dimethylguanosine	1345	TRUE	-2.53054	-0.0878315	0.0999511	0.154926	0.0208693	0.0240514	0.0454749	1.01146	1.13811	2.51362e-57	0.227675	0.120709	0.00233476	0.782619	2.47841e-25	1.66635e-30	0.59613	0.51173	0.529862	0.353612
212	carotene diol (1)	1345	TRUE	1.187	-0.083395	0.0993684	-0.101154	-0.315777	0.0152347	-0.0641098	-3.1586	3.49393	5.13069e-14	0.249304	0.120744	0.0456162	2.68221e-05	3.45831e-11	1.42683e-59	0.0960019	0.0427699	0.562832	0.353612
265	gamma-tocopherol/beta-tocopherol	1345	TRUE	-1.04046	-0.170403	0.108834	0.109729	0.0180478	-0.00407997	0.043088	-4.54423	-3.216	1.72442e-09	0.0317073	0.120947	0.0478502	0.826658	0.10541	1.80853e-23	0.0288678	0.0888171	0.235598	0.353612
763	2-aminobutyrate	1345	TRUE	-0.28352	-0.0838183	0.108899	0.161776	-0.031525	0.00373939	0.000800399	-3.81569	-2.61763	0.101211	0.291255	0.12116	0.00356997	0.702406	0.138264	0.85305	0.066832	0.166528	0.6013	0.353612
735	bilirubin (Z,Z)	1345	TRUE	0.257233	0.135132	0.105777	0.400618	-0.0835836	0.00164298	-0.0185236	-0.370296	-2.15189	0.127233	0.0809806	0.122583	1.35695e-13	0.298833	0.504169	1.10043e-05	0.855255	0.24345	0.332838	0.355513
309	sphingomyelin (d17:2/16:0, d18:2/15:0)*	1345	TRUE	-1.85905	-0.0182877	0.0972654	-0.560904	-0.416162	0.0232066	0.0358941	1.8241	-0.687743	4.21072e-33	0.797326	0.122604	1.89987e-29	1.85288e-08	1.07254e-24	1.96555e-20	0.32848	0.685198	0.914268	0.355513
280	adipoylcarnitine (C6-DC)	1345	TRUE	-1.60323	0.0509654	0.104163	0.290015	0.0645509	0.0153392	0.0242293	1.35261	-5.43424	5.87581e-22	0.504845	0.123398	5.68154e-08	0.416204	2.63367e-10	5.64086e-09	0.499558	0.00283852	0.763636	0.35666
81	tyrosine	1345	TRUE	-1.5427	0.00565725	0.106103	0.312096	0.004655	0.00916726	0.0350475	-1.82487	0.257848	1.41062e-19	0.942367	0.125354	1.16113e-08	0.954338	0.000225873	1.84339e-16	0.37366	0.889995	0.979188	0.361082
109	behenoylcarnitine (C22)*	1345	TRUE	-0.562254	0.0632588	0.108129	0.196132	-0.204518	0.0127613	-0.00403986	-4.25858	-3.87851	0.00122147	0.428097	0.125734	0.000440259	0.0136594	4.83361e-07	0.352294	0.0418377	0.0414096	0.727713	0.361082
747	N6-acetyllysine	1345	TRUE	-1.13458	-0.0232204	0.106497	0.122984	0.183592	0.0179709	0.00668919	9.83739	-2.89597	4.44517e-11	0.768996	0.127869	0.026073	0.0254105	8.32497e-13	0.119951	2.06979e-06	0.124185	0.89982	0.364879
891	linoleate (18:2n6)	1345	TRUE	-0.562502	0.114733	-0.10159	-0.401873	-0.0913919	0.00675676	0.0133712	-6.42388	-1.18432	0.000616683	0.128207	0.127871	2.49507e-14	0.243467	0.00479708	0.00112037	0.00115739	0.509825	0.41132	0.364879
538	X - 15469	1345	TRUE	0.183329	0.126932	-0.106695	0.513549	-0.146814	0.00615763	-0.0221843	-5.53631	-0.479418	0.28911	0.109905	0.128779	2.20008e-20	0.0751104	0.0146274	2.81908e-07	0.00781573	0.799928	0.387696	0.365162
626	ximenoylcarnitine (C26:1)*	1345	TRUE	-0.76324	0.0481328	0.101485	0.621503	-0.320853	0.0202178	-0.0136095	-3.80658	-4.79848	3.48651e-06	0.52392	0.128785	5.45582e-32	4.32763e-05	3.52374e-17	0.000926341	0.0545112	0.00765605	0.772093	0.365162
850	dodecenedioate (C12:1-DC)*	1345	TRUE	-0.500895	0.0966909	0.110465	-0.0904897	-0.0202825	0.0157924	-0.00997624	-1.30478	0.0625714	0.00523382	0.240397	0.129495	0.116022	0.812623	1.57388e-09	0.0259949	0.545606	0.97456	0.549415	0.365813
242	1-oleoyl-GPC (18:1)	1345	TRUE	1.2213	-0.0878868	0.0932634	0.232581	-0.264772	0.0126973	-0.0668659	7.32732	0.787684	7.824e-16	0.206657	0.129831	1.7483e-06	0.000250298	9.26288e-09	8.7574e-70	5.90964e-05	0.63474	0.508693	0.365813
866	X - 12462	1345	TRUE	0.231951	-0.295187	0.113633	0.170571	0.100118	-0.00160573	-0.00692619	-13.0652	-4.21241	0.210613	0.000520413	0.13106	0.00412668	0.257274	0.552342	0.134535	4.65565e-09	0.0376623	0.0245416	0.368117
677	X - 21353	1345	TRUE	0.159769	0.0768225	-0.106637	0.0128278	-0.118083	0.000899254	-0.00655391	-11.837	0.504556	0.359685	0.33742	0.132283	0.818763	0.155817	0.723706	0.132545	1.7144e-08	0.79143	0.648765	0.37002
750	stearidonate (18:4n3)	1345	TRUE	-0.296684	0.0380246	-0.104645	-0.466313	0.142162	0.00914595	0.000315403	4.41247	1.69694	0.0832679	0.628741	0.132563	2.21442e-17	0.0818656	0.000251029	0.941241	0.0323251	0.365096	0.838073	0.37002
46	isoleucine	1345	TRUE	-1.28481	0.0446665	-0.0903049	0.993295	0.182698	-0.00390418	0.038946	-7.35656	-2.34533	5.71411e-18	0.513058	0.134967	3.71474e-96	0.0100183	0.0718786	1.04407e-25	3.96311e-05	0.149418	0.769504	0.37556
140	hexadecadienoate (16:2n6)	1345	TRUE	-0.561296	0.0882314	-0.101825	-0.495834	-0.0544973	0.00491536	0.0177226	-3.48904	-2.30285	0.000855371	0.25364	0.13644	4.43754e-20	0.497332	0.045271	2.50464e-05	0.0850547	0.211074	0.562832	0.377203
278	androstenediol (3alpha, 17alpha) monosulfate (3)	1345	TRUE	0.855163	0.0589124	-0.088221	0.924054	-0.0151765	-0.0262315	0.00224871	-8.62509	-6.44617	4.59307e-09	0.379148	0.136568	1.11871e-86	0.827369	6.38217e-35	0.537239	9.01825e-07	5.36206e-05	0.679433	0.377203
389	X - 24813	1345	TRUE	-0.0393623	0.0269497	0.0956433	0.0713723	-0.122109	0.00250461	-0.00517983	-0.27897	-2.29417	0.803708	0.710901	0.137043	0.160266	0.105983	0.278166	0.190418	0.883633	0.185372	0.871856	0.377203
245	pantothenate	1345	TRUE	-1.06726	-0.0308173	0.103139	0.18087	0.168807	0.0231433	-0.00450879	2.60758	-2.65382	4.20519e-10	0.69444	0.137241	0.000973244	0.0383354	1.57708e-20	0.290806	0.204788	0.155622	0.861799	0.377203
672	N-acetylalliin	1345	TRUE	-0.0658522	-0.21051	0.103875	0.19233	-0.106503	0.00654931	-0.0101305	1.23653	1.34716	0.702544	0.00783875	0.138051	0.000510624	0.19537	0.00920551	0.0186828	0.551296	0.475082	0.114983	0.378269
254	palmitoyl-linoleoyl-glycerol (16:0/18:2) [2]*	1345	TRUE	-1.39649	0.120142	-0.0974558	0.377589	0.0890728	-0.00146381	0.0480252	-0.934936	-5.86185	6.79658e-18	0.106331	0.138674	3.85985e-13	0.249134	0.535624	1.80555e-32	0.631644	0.000941981	0.384341	0.378816
391	palmitoyl-docosahexaenoyl-glycerol (16:0/22:6) [1]*	1345	TRUE	-0.917099	0.0849621	0.102729	0.208437	0.375926	0.00918977	0.0129781	-2.86292	-0.4064	9.26785e-08	0.281207	0.140801	0.000155702	4.44309e-06	0.000243034	0.00248307	0.165983	0.828707	0.589692	0.383457
292	citrulline	1345	TRUE	-0.537067	-0.187851	0.0970237	0.233326	-0.196422	0.0236167	-0.0237461	5.87598	-0.897763	0.000942625	0.0117541	0.141314	7.58716e-06	0.0112206	2.02486e-23	4.81305e-09	0.00264368	0.613275	0.140422	0.383644
173	1-stearoyl-2-docosahexaenoyl-GPC (18:0/22:6)	1345	TRUE	-0.42335	-0.0401925	-0.101744	0.0136445	0.267443	0.0215064	-0.0211702	-7.02317	3.2426	0.0130153	0.607591	0.141726	0.803071	0.00100542	5.12887e-18	6.65166e-07	0.000619171	0.0820431	0.828088	0.383644
89	tetradecadienoate (14:2)*	1345	TRUE	0.269649	0.097745	-0.102748	-0.379764	-0.0844496	-0.000837594	-0.00294545	-7.36229	0.75902	0.11949	0.218987	0.144126	8.38401e-12	0.306659	0.74018	0.495996	0.000412379	0.68867	0.515141	0.387922
511	phosphatidylcholine (14:0/14:0, 16:0/12:0)	1345	TRUE	0.117197	-0.0214633	0.100197	-0.265848	-0.0939545	-0.00200017	0.00277985	7.34647	-0.425702	0.487788	0.781964	0.144172	9.40354e-07	0.243559	0.41681	0.510016	0.000301778	0.817775	0.904379	0.387922
885	hexadecenedioate (C16:1-DC)*	1345	TRUE	0.270774	0.00578669	0.103486	0.0834239	-0.00756478	0.000752961	-0.0118178	-1.92156	-0.827263	0.121537	0.942545	0.14514	0.137197	0.92774	0.767814	0.00682568	0.361253	0.665395	0.979188	0.388561
231	3-phosphoglycerate	1345	TRUE	-0.134848	0.252728	-0.103301	0.243446	-0.0605614	-0.000840142	0.00356286	2.96774	-1.29628	0.439988	0.00162033	0.145277	1.40149e-05	0.467174	0.741477	0.414065	0.157921	0.497359	0.0500625	0.388561
0	linoleoyl ethanolamide	1345	TRUE	-1.02142	0.134052	-0.100602	-0.111596	-0.242798	0.0116178	0.0191278	-4.99768	1.87824	2.40409e-09	0.0880257	0.147858	0.0422031	0.00293869	3.24836e-06	7.68271e-06	0.0152581	0.315729	0.345397	0.394289
433	androstenediol (3alpha, 17alpha) monosulfate (2)	1345	TRUE	1.28468	0.129503	-0.0884496	0.672809	-0.0253658	-0.0380294	0.0092742	6.04363	-3.31413	2.24334e-17	0.0626065	0.150575	1.5044e-43	0.725551	2.09104e-66	0.0142549	0.00091686	0.0454908	0.304607	0.400022
332	androsterone sulfate	1345	TRUE	1.09923	0.0131998	-0.0939363	0.530139	0.0911844	-0.0207595	-0.0104349	-6.50405	-8.04289	8.67287e-12	0.858286	0.150901	1.08349e-24	0.235115	9.50571e-19	0.00947699	0.000789765	4.95352e-06	0.940127	0.400022
659	3,5-dichloro-2,6-dihydroxybenzoic acid	1345	TRUE	-1.25593	-0.00477214	-0.0943066	0.266852	0.243748	-0.00737656	0.0489538	-0.194519	-3.16101	8.82584e-15	0.948826	0.15166	2.8373e-07	0.00160252	0.00178843	1.046e-33	0.920503	0.0743498	0.979188	0.400847
698	2'-O-methyluridine	1345	TRUE	-0.177347	0.0041051	-0.0981271	0.33099	-0.111439	0.00977742	-0.0128289	0.000717768	6.15254	0.293508	0.957764	0.152436	1.00638e-09	0.166406	7.15344e-05	0.00235078	0.999718	0.000863176	0.980911	0.401713
37	palmitoleoylcarnitine (C16:1)*	1345	TRUE	-1.05965	0.166177	0.0976238	-0.0511634	-0.0770445	0.0246658	-0.00324923	-3.0506	-2.91621	3.00749e-10	0.0314492	0.153116	0.343378	0.337016	8.90697e-24	0.439445	0.131912	0.113037	0.235598	0.402322
828	oleoylcarnitine (C18:1)	1345	TRUE	-0.787401	0.18048	0.0960647	0.336497	-0.189473	0.0248108	-0.0171898	-3.47149	-2.18452	2.08777e-06	0.0178494	0.154106	2.65621e-10	0.0166821	1.16446e-24	3.3748e-05	0.0821917	0.228802	0.170812	0.403739
571	X - 11852	1345	TRUE	-0.433127	0.00538164	0.101403	0.155405	0.046466	0.00466663	0.00306023	2.4823	4.78108	0.0135755	0.946742	0.154814	0.00579194	0.578789	0.068218	0.485091	0.239838	0.0127402	0.979188	0.404413
629	3-carboxy-4-methyl-5-pentyl-2-furanpropionate (3-CMPFP)**	1345	TRUE	-0.641721	-0.189744	0.0970836	0.235843	0.0930063	0.0183934	-0.0111482	-1.03265	-3.55672	0.000151901	0.0147093	0.158278	1.44131e-05	0.249744	9.71063e-14	0.00843141	0.612524	0.0549354	0.156742	0.410848
470	X - 17653	1345	TRUE	0.556349	-0.045975	-0.0966903	0.482455	0.167685	-0.0166154	0.00184941	-9.92545	-0.858434	0.00098172	0.553054	0.158487	5.35712e-19	0.0372934	1.48745e-11	0.660974	1.03235e-06	0.641999	0.800543	0.410848
741	creatinine	1345	TRUE	-0.404639	-0.0929715	-0.0836243	1.14911	-0.076294	0.0064505	-0.0105989	5.04897	6.21346	0.00563094	0.165904	0.158938	1.61821e-132	0.273789	0.00247584	0.00369631	0.00410065	0.000101653	0.453699	0.410848
202	X - 21470	1345	TRUE	0.812409	0.0646411	0.0918709	0.388957	-0.0217393	-0.0289052	0.0152387	-8.98166	-4.17038	4.24944e-07	0.380778	0.159112	4.55108e-14	0.776622	5.61318e-35	0.000146113	3.38825e-06	0.017621	0.680867	0.410848
436	X - 24544	1345	TRUE	1.25408	0.1451	-0.0856078	0.70614	-0.134128	-0.0302369	-0.00206002	-4.57651	-4.15409	6.18419e-17	0.0351002	0.15993	1.01095e-48	0.0608039	1.82223e-43	0.582423	0.0112317	0.0113347	0.247636	0.411774
665	X - 21258	1345	TRUE	0.471976	-0.0241346	0.0947737	0.197731	0.0596701	0.00924464	-0.0357816	2.20074	8.22034	0.00459686	0.752277	0.161195	0.000216246	0.452556	0.000141055	7.90974e-18	0.272213	6.40399e-06	0.891619	0.413749
723	1-linoleoyl-GPE (18:2)*	1345	TRUE	0.411086	-0.0966853	0.0966535	0.186347	-0.306709	0.00310519	-0.0206064	2.24002	-6.7018	0.0156094	0.215484	0.161621	0.000637862	0.000155519	0.210435	1.2226e-06	0.273636	0.000313635	0.515044	0.413749
360	1-stearoyl-2-arachidonoyl-GPE (18:0/20:4)	1345	TRUE	-0.39671	0.161625	0.0982062	-0.256949	0.361734	-0.00334419	0.0206557	-0.727167	-0.577659	0.0224785	0.0428529	0.164246	4.11383e-06	1.28428e-05	0.187111	1.96634e-06	0.728154	0.761271	0.268505	0.417137
539	X - 17351	1345	TRUE	0.309026	0.111372	-0.0948593	-0.0750236	0.00165161	0.0104028	-0.0259853	5.32358	5.26946	0.0657109	0.148557	0.164267	0.163893	0.983548	2.15556e-05	5.8263e-10	0.0084313	0.00411713	0.436133	0.417137
575	docosadienoate (22:2n6)	1345	TRUE	-0.555872	0.136611	0.0965649	-0.153868	-0.112008	0.00710677	0.00797497	-4.61554	-0.840937	0.00114825	0.0817843	0.164341	0.00504464	0.16958	0.00436644	0.0618493	0.0248842	0.65293	0.334606	0.417137
72	isovalerylcarnitine (C5)	1345	TRUE	-1.17885	-0.170747	0.0895553	0.71469	0.244888	0.000377577	0.0292543	-4.1658	0.72779	1.27606e-13	0.0194276	0.165849	1.68844e-44	0.00125287	0.870746	1.84075e-13	0.0296067	0.675832	0.177624	0.419226
464	1,2-dilinoleoyl-GPC (18:2/18:2)	1345	TRUE	1.19889	-0.146624	0.0909201	-0.0818017	-0.708104	0.00190584	-0.0406566	0.881057	-4.77566	1.19763e-13	0.0481861	0.166099	0.114847	4.14316e-20	0.418811	7.5744e-24	0.650622	0.00691099	0.274999	0.419226
281	phosphatidylcholine (18:0/20:2, 20:0/18:2)*	1345	TRUE	-0.107069	0.0451075	0.0970208	-0.317649	-0.376739	0.0126746	-0.0119406	1.00815	-3.18725	0.535312	0.569466	0.166662	1.00273e-08	4.80673e-06	4.85472e-07	0.00564764	0.627676	0.0915831	0.811829	0.419464
151	dimethylglycine	1345	TRUE	-0.754376	-0.0364261	0.0919689	0.424356	0.120631	0.00910202	0.00619007	-5.95416	0.961154	4.49097e-06	0.62949	0.168549	8.98911e-16	0.124079	0.000147512	0.131854	0.00262654	0.593109	0.838073	0.423026
669	glycosyl-N-behenoyl-sphingadienine (d18:2/22:0)*	1345	TRUE	-0.169196	-0.0374118	0.0966189	-0.134783	-0.695045	0.0147974	-0.0153193	-2.15541	0.042303	0.32842	0.637876	0.169439	0.0152805	3.86958e-17	4.60667e-09	0.000396714	0.300922	0.982178	0.841799	0.423835
862	phenylacetylcarnitine	1345	TRUE	-0.667147	-0.0199045	0.0964801	0.0510258	0.332328	0.0131462	-0.00206394	-3.5517	-2.23989	0.000115419	0.802161	0.169818	0.358198	5.65874e-05	1.89161e-07	0.633004	0.0880965	0.23662	0.917926	0.423835
530	arachidoylcarnitine (C20)*	1345	TRUE	-0.308139	-0.0399811	0.0865292	0.527589	-0.218761	0.026299	-0.0397469	-5.5811	-2.1669	0.0483868	0.576949	0.172342	6.25999e-26	0.00330313	7.19913e-31	2.13361e-24	0.00297146	0.204416	0.813233	0.42894
17	carboxyethyl-GABA	1345	TRUE	-0.67635	0.00481384	0.0919591	0.18116	-0.0455816	0.0196767	-0.0126806	1.91418	-1.70052	4.68417e-05	0.949682	0.17298	0.000680597	0.565174	4.63052e-16	0.00224819	0.338424	0.349413	0.979188	0.429335
392	malate	1345	TRUE	-0.237409	-0.0100531	0.0928153	0.285792	-0.0560935	0.0129991	-0.0174696	0.248745	1.38995	0.157719	0.896328	0.17388	1.16504e-07	0.484039	1.13114e-07	3.15976e-05	0.902113	0.449532	0.959779	0.430378
203	5-acetylamino-6-formylamino-3-methyluracil	1345	TRUE	-0.398662	-0.112501	0.0967865	0.0503856	0.00540891	0.00638511	0.00275686	-0.945868	-4.33786	0.0232416	0.163049	0.174942	0.371499	0.94853	0.0126887	0.529841	0.654591	0.0239711	0.448136	0.431813
115	1-(1-enyl-palmitoyl)-2-arachidonoyl-GPC (P-16:0/20:4)*	1345	TRUE	0.383995	-0.115126	0.0955265	0.282284	-0.133579	-0.00601954	-0.00701116	-0.278852	6.62032	0.0270924	0.148947	0.175839	4.14298e-07	0.106984	0.0175135	0.106212	0.89391	0.000494584	0.436133	0.432833
182	glycine conjugate of C10H12O2*	1345	TRUE	-0.997103	-0.206743	0.0931963	0.263853	-0.0073196	0.00212749	0.0293021	1.46033	-1.3484	5.18236e-09	0.0083414	0.178897	1.46515e-06	0.928369	0.392772	6.34415e-12	0.477196	0.470191	0.114983	0.437462
113	glutamine	1345	TRUE	0.08203	0.0240722	-0.0902898	0.367726	-0.128478	0.0129107	-0.028766	5.52307	-0.668116	0.620056	0.751335	0.179112	4.37491e-12	0.103544	8.77295e-08	3.4099e-12	0.00554514	0.712008	0.891619	0.437462
222	X - 24588	1345	TRUE	-1.66765	-0.132026	0.0874556	0.787061	0.0632707	0.0106781	0.0310159	-0.730352	-0.687215	2.38257e-25	0.072817	0.179184	7.81176e-53	0.407935	4.92684e-06	9.48749e-15	0.704995	0.695092	0.32299	0.437462
847	palmitoylcarnitine (C16)	1345	TRUE	-1.18459	0.190614	0.0916764	0.582185	-0.068814	0.0148216	0.00858112	-4.28879	-2.74273	1.94446e-12	0.0136334	0.179897	4.39131e-27	0.391339	1.55489e-09	0.0412465	0.0342331	0.136263	0.150809	0.43801
516	eicosenoylcarnitine (C20:1)*	1345	TRUE	-0.361648	0.107088	0.0831535	0.480001	-0.202438	0.0294918	-0.0426314	-2.29569	-2.18372	0.0189939	0.130325	0.184229	3.01243e-22	0.00590986	2.65528e-39	1.77269e-28	0.216017	0.195361	0.415555	0.447343
692	decanoylcarnitine (C10)	1345	TRUE	0.277535	0.0599219	-0.093344	-0.000263121	-0.0288257	0.00580712	-0.0177099	-7.83842	3.39199	0.109667	0.45189	0.185295	0.99623	0.727592	0.0217242	4.38204e-05	0.000174053	0.0738682	0.737359	0.447965
649	maltose	1345	TRUE	-0.213344	0.0496416	-0.0893635	-0.0767796	-0.0286599	-0.00989081	0.0208788	-3.01473	0.710223	0.199652	0.515699	0.185957	0.150402	0.717942	4.55919e-05	5.04557e-07	0.132104	0.696286	0.770111	0.447965
762	cysteine	1345	TRUE	0.192097	-0.00930911	-0.092844	0.153609	0.010875	0.00780838	-0.020879	4.66116	-4.22389	0.266953	0.906724	0.186517	0.00567891	0.895178	0.0019739	1.36455e-06	0.0252133	0.0256428	0.960313	0.447965
818	sphingomyelin (d18:2/18:1)*	1345	TRUE	-1.00936	-0.00307654	-0.0861679	-0.433235	-0.496877	0.00371606	0.0380173	-2.14094	-0.880072	3.36934e-10	0.966741	0.186809	4.49063e-17	9.05127e-11	0.11284	2.79876e-21	0.268331	0.616614	0.982602	0.447965
567	1-stearoyl-2-adrenoyl-GPC (18:0/22:4)*	1345	TRUE	-0.979213	0.089408	0.0905934	-0.00600445	-0.0345425	-0.00466428	0.0418595	4.87063	4.82019	7.3089e-09	0.250063	0.187711	0.912014	0.668844	0.0588844	4.27095e-23	0.0168336	0.00924584	0.562832	0.447965
35	X - 12216	1345	TRUE	-0.0184739	0.00181234	0.087612	-0.0226611	0.0333074	0.0170151	-0.029092	12.8534	5.11829	0.91017	0.980767	0.187728	0.666323	0.669773	1.03766e-12	1.14003e-12	6.92008e-11	0.00426669	0.989603	0.447965
322	biliverdin	1345	TRUE	0.28625	0.110506	0.0888293	0.518117	-0.0969638	0.00447999	-0.0255068	1.98358	-3.10042	0.0848475	0.147354	0.187985	2.52518e-22	0.221037	0.0644149	7.90155e-10	0.321108	0.0879397	0.43574	0.447965
793	lignoceroyl sphingomyelin (d18:1/24:0)	1345	TRUE	-0.025001	-0.1212	0.0913802	0.116882	-0.629406	0.0103111	-0.0143342	0.950251	0.760734	0.883864	0.122988	0.188686	0.0333594	1.26102e-14	3.61243e-05	0.000800405	0.644575	0.684485	0.400717	0.448441
631	aconitate [cis or trans]	1345	TRUE	-1.86177	-0.0717353	0.087423	-0.0377898	0.133402	0.0263675	0.0188791	-0.331599	-0.280703	8.40157e-30	0.341299	0.189893	0.473309	0.0884975	3.35478e-28	4.1656e-06	0.866735	0.875798	0.6509	0.450118
721	1-oleoyl-2-linoleoyl-GPE (18:1/18:2)*	1345	TRUE	0.254279	-0.0164553	0.0927348	-0.287922	-0.000706054	0.00239833	-0.00845752	-0.162043	-5.57147	0.145214	0.837326	0.190905	2.76241e-07	0.993234	0.346153	0.05244	0.93852	0.00352395	0.93198	0.450716
350	2-oxoarginine*	1345	TRUE	-0.962744	0.00108732	0.0917796	0.436429	0.149609	-0.00208251	0.0310524	2.0703	0.442957	2.55579e-08	0.989069	0.191152	3.65327e-15	0.0696042	0.408762	6.42539e-13	0.319676	0.814775	0.991282	0.450716
48	X - 11483	1345	TRUE	0.043595	-0.0951951	-0.0895313	0.111909	-0.104701	0.00665525	-0.0120727	7.07512	4.45612	0.796526	0.220074	0.192325	0.0391829	0.194188	0.00695229	0.00425719	0.000507091	0.0159719	0.515141	0.452291
147	bilirubin (E,Z or Z,E)*	1345	TRUE	0.382872	0.0836931	0.0885484	0.36328	-0.0412257	0.000729677	-0.0194628	-3.40029	-2.25074	0.0230015	0.27908	0.195501	1.80708e-11	0.607811	0.766397	3.72297e-06	0.0934281	0.221779	0.589692	0.458558
381	X - 14939	1345	TRUE	0.267284	0.053372	-0.0872706	0.274132	0.0604985	-0.00888799	0.00319896	-15.3201	-2.36372	0.109732	0.486672	0.198545	3.20559e-07	0.447871	0.000265442	0.443501	2.59439e-14	0.195972	0.754425	0.460854
504	ribonate	1345	TRUE	-1.09343	-0.103519	0.0907813	-0.0787369	-0.0304078	0.015128	0.01266	2.63562	2.26651	3.49997e-10	0.1957	0.199625	0.159185	0.714484	2.63448e-09	0.00363338	0.208854	0.234392	0.494923	0.460854
196	X - 11858	1345	TRUE	0.399116	-0.0697078	0.0911996	-0.0210747	-0.188219	0.00249496	-0.0159214	-5.27492	-2.62064	0.0227429	0.386232	0.200053	0.70786	0.0243249	0.328897	0.000275456	0.0123744	0.171529	0.683921	0.460854
303	3-methyl-2-oxobutyrate	1345	TRUE	-0.803957	-0.0397794	0.0881665	0.523288	0.0490535	-0.00395493	0.0277073	-2.62365	-4.15775	2.079e-06	0.609051	0.200089	6.33425e-22	0.54382	0.109427	5.86303e-11	0.198167	0.0248495	0.828088	0.460854
57	succinimide	1345	TRUE	0.263396	0.0090369	0.0843597	0.590791	-0.110094	0.00465425	-0.0249284	-2.19047	-2.24001	0.10424	0.90337	0.20017	7.10843e-30	0.154544	0.0490126	7.49574e-10	0.261602	0.206538	0.960313	0.460854
44	maltotriose	1345	TRUE	-0.256874	0.14358	-0.0875193	-0.0370954	-0.0191584	-0.00957839	0.0217443	-1.92456	-1.61515	0.126958	0.0631611	0.200464	0.492268	0.811382	9.52828e-05	2.31835e-07	0.34206	0.380307	0.304607	0.460854
319	N-stearoyl-sphinganine (d18:0/18:0)*	1345	TRUE	-1.87348	0.0525005	0.0825125	-0.0136493	0.23055	0.00168356	0.062221	-1.94906	-4.6829	4.11206e-32	0.471554	0.200887	0.788888	0.00234067	0.467329	1.99729e-55	0.307905	0.00702805	0.747779	0.460854
469	hydroxy-N6,N6,N6-trimethyllysine*	1345	TRUE	-1.48474	-0.168465	0.0853667	0.540791	0.0986139	0.0163076	0.0128618	-0.501384	-1.50457	1.70303e-19	0.0256278	0.20112	1.20103e-24	0.208569	1.03562e-11	0.00173788	0.799965	0.402785	0.210666	0.460854
311	inosine	1345	TRUE	-0.419391	0.283982	0.0949002	0.0432595	-0.0334833	-0.00416638	0.0199248	1.4052	-1.50572	0.0218755	0.000722021	0.20154	0.461262	0.701183	0.118368	1.30033e-05	0.523323	0.451763	0.0308062	0.460854
69	sphingomyelin (d18:0/18:0, d19:0/17:0)*	1345	TRUE	-1.52388	-0.00735899	0.0847759	-0.12458	-0.00349416	0.00326241	0.0502292	-1.72407	-2.21773	1.13017e-20	0.921884	0.201624	0.0175625	0.964253	0.17112	8.86058e-35	0.380807	0.214816	0.970632	0.460854
509	X - 23680	1345	TRUE	-1.18016	-0.0088924	-0.0855061	0.495515	0.0533116	0.00372685	0.0300554	-6.69161	-2.84445	8.7478e-13	0.906603	0.202231	8.58823e-21	0.498379	0.121619	3.13947e-13	0.00075712	0.115196	0.960313	0.461067
636	1-arachidonylglycerol (20:4)	1345	TRUE	-0.650657	-0.03159	0.0866367	-0.265	0.0562524	0.0141956	0.00171314	0.401717	7.4723	0.000106273	0.681913	0.203879	8.73122e-07	0.482368	6.70028e-09	0.682898	0.842398	4.71542e-05	0.860956	0.463644
129	margarate (17:0)	1345	TRUE	-0.867738	0.173108	-0.0889626	-0.149521	0.0177849	0.0105169	0.0129192	-4.74802	0.347828	5.86066e-07	0.0299537	0.207315	0.00731665	0.830029	3.299e-05	0.00290608	0.0231302	0.854738	0.229389	0.470264
206	X - 18899	1345	TRUE	1.26397	-0.108071	-0.0870692	0.0331135	-0.0790732	-0.00663216	-0.031429	-3.17028	0.903162	1.65854e-13	0.16969	0.211092	0.547249	0.333486	0.00797714	2.13832e-13	0.12436	0.63002	0.456584	0.477621
643	X - 12798	1345	TRUE	-1.23948	0.112021	-0.0893822	0.102936	0.029348	0.00140553	0.0392776	4.46213	-1.73102	2.55956e-12	0.168226	0.213944	0.0701012	0.728229	0.586241	6.69461e-19	0.0362733	0.371456	0.4555	0.482856
92	N,N-dimethylalanine	1345	TRUE	0.384165	-0.119535	0.0881396	0.110366	0.0464141	-0.000407329	-0.0150383	-1.14286	-1.57836	0.028167	0.13687	0.215032	0.0494476	0.57823	0.873209	0.000582544	0.587436	0.409679	0.421427	0.483282
233	alanine	1345	TRUE	-1.494	0.0207494	-0.0809675	0.211214	0.169791	0.006527	0.0380312	-0.376568	-0.134753	1.56331e-20	0.778727	0.215211	4.28675e-05	0.0268883	0.00539307	2.9228e-21	0.845761	0.938947	0.904379	0.483282
430	X - 17676	1345	TRUE	-1.01179	-0.139942	0.0829392	0.0725613	0.0646328	0.0138944	0.0113726	17.0107	-0.247137	1.01462e-09	0.0658034	0.217755	0.172378	0.413422	8.8894e-09	0.0059972	1.44777e-17	0.891524	0.307082	0.486629
420	pentadecanoate (15:0)	1345	TRUE	-0.599762	0.210401	-0.0839683	-0.296467	-0.0187856	0.00652783	0.0120932	2.06929	-0.377144	0.000349561	0.00629572	0.217788	3.65645e-08	0.814372	0.00762002	0.00390116	0.305364	0.837141	0.106433	0.486629
697	phosphate	1345	TRUE	0.197235	0.0532145	-0.0846132	-0.268841	-0.0213858	0.00804108	-0.0167715	3.57244	-0.913788	0.2444	0.493941	0.218895	7.6698e-07	0.791307	0.00113728	7.41768e-05	0.0797966	0.621976	0.757556	0.486778
138	ethylmalonate	1345	TRUE	-0.652618	0.150824	0.086519	-0.0462467	0.0872051	0.00923195	0.00655672	8.89175	-5.86912	0.000165583	0.0579736	0.218942	0.405638	0.29136	0.000258759	0.129816	2.00898e-05	0.00195671	0.304607	0.486778
743	1-palmitoyl-2-adrenoyl-GPC (16:0/22:4)*	1345	TRUE	-0.53576	0.0584631	0.0842945	-0.0406113	-0.0493832	-0.00684628	0.0312088	6.77707	2.10732	0.00171555	0.456134	0.224526	0.458981	0.544571	0.00600646	2.63789e-13	0.000982381	0.259523	0.739545	0.497958
540	1-oleoyl-2-dihomo-linolenoyl-GPC (18:1/20:3)*	1345	TRUE	-0.328799	0.0794496	-0.0855187	-0.344663	-0.1112	0.00110384	0.0154526	12.1879	-0.72751	0.0591242	0.320582	0.226848	7.09842e-10	0.18085	0.663961	0.000384303	6.14882e-09	0.702635	0.6313	0.501866
734	X - 21821	1345	TRUE	0.311212	0.0905782	-0.0845097	-0.0189523	0.0232193	0.00812061	-0.0236114	4.9734	5.35855	0.0722416	0.254479	0.229442	0.733045	0.778575	0.00129852	4.77243e-08	0.0169913	0.00465942	0.562832	0.506356
361	sphingomyelin (d18:1/20:1, d18:2/20:0)*	1345	TRUE	-0.891514	-0.0691787	-0.0811371	-0.45553	-0.402968	0.01238	0.0196026	-3.68371	3.43572	9.43039e-08	0.367018	0.231722	1.9432e-17	4.24048e-07	3.73037e-07	2.6269e-06	0.0668859	0.0600402	0.663001	0.510129
781	propionylcarnitine (C3)	1345	TRUE	-1.66141	-0.10776	0.0771409	0.785169	0.21022	0.0108123	0.0285959	-7.28269	-1.06005	2.81227e-25	0.142236	0.235037	8.14945e-53	0.00585763	3.55905e-06	8.21627e-13	0.000154655	0.544549	0.43006	0.516159
426	stachydrine	1345	TRUE	0.0917776	0.00114185	0.0819009	0.101469	0.0318727	0.0116742	-0.022957	-3.58638	0.681619	0.589998	0.98835	0.236468	0.0634323	0.694824	2.60349e-06	6.8292e-08	0.0801983	0.714467	0.991282	0.518034
474	hippurate	1345	TRUE	0.209245	-0.0484997	-0.0785844	-0.0466075	-0.0822145	0.0185134	-0.0368766	5.54255	1.76058	0.201909	0.519419	0.238018	0.375817	0.293169	9.7778e-15	2.19379e-19	0.00497528	0.326278	0.770883	0.519716
2	X - 16397	1345	TRUE	-1.20322	-0.118793	0.0801473	0.277035	-0.132161	0.0174882	0.0102743	4.12105	-1.64165	6.64627e-13	0.122255	0.238572	2.53046e-07	0.0979432	7.93359e-13	0.0140268	0.0408394	0.37003	0.400717	0.519716
597	2-methylbutyrylcarnitine (C5)	1345	TRUE	-1.40627	-0.0943091	0.073113	0.854993	0.284805	0.00397251	0.0313237	-2.86464	-1.01936	3.87369e-20	0.179406	0.239383	6.74228e-68	9.51371e-05	0.0750105	2.48815e-16	0.119773	0.542444	0.46934	0.519716
257	methionine sulfone	1345	TRUE	-0.424542	-0.151159	0.079349	-0.0926881	0.125172	0.0230051	-0.0237149	3.43362	-0.415504	0.0106649	0.0476765	0.239988	0.0823915	0.114474	2.35645e-21	1.12958e-08	0.0861671	0.819275	0.274999	0.519716
859	3-methylglutarylcarnitine (2)	1345	TRUE	-0.935094	0.0148617	0.0774924	-0.231932	0.545693	0.0139507	0.00926592	14.889	-4.25658	8.5505e-09	0.842032	0.240137	8.62162e-06	1.87175e-12	3.87025e-09	0.0223859	2.60156e-14	0.016578	0.932584	0.519716
787	gamma-CEHC	1345	TRUE	-0.523753	-0.026791	-0.0827442	0.0270615	0.168171	0.00160841	0.0145597	-0.794559	-1.26863	0.0026458	0.737685	0.242299	0.628429	0.0430089	0.526723	0.000821817	0.704743	0.505608	0.889591	0.522963
602	X - 18922	1345	TRUE	-0.36412	-0.0180867	0.0836141	0.0734937	-0.0954792	0.00921319	-0.00241968	-7.23977	3.61131	0.0391842	0.823448	0.243652	0.19467	0.256919	0.000346244	0.58328	0.000656938	0.0614989	0.92734	0.522963
558	X - 14056	1345	TRUE	-1.023	-0.0402529	-0.0801629	0.272804	0.188548	-0.000694319	0.0327192	1.81435	-5.56644	1.55013e-09	0.604766	0.243985	5.23037e-07	0.0196209	0.778671	1.05759e-14	0.373498	0.00266288	0.826021	0.522963
9	N-acetylaspartate (NAA)	1345	TRUE	0.730863	-0.061921	0.0815481	-0.375709	-0.215394	0.00684398	-0.0355341	1.75098	1.43484	2.30246e-05	0.434693	0.244862	1.19852e-11	0.0089064	0.00656279	1.73095e-16	0.399397	0.447368	0.732114	0.522963
621	tricosanoyl sphingomyelin (d18:1/23:0)*	1345	TRUE	-0.543612	-0.0924213	0.080969	-0.178534	-0.540458	0.0141863	0.00104447	-1.08652	-0.812883	0.0015631	0.24154	0.246136	0.00121097	4.33522e-11	1.51893e-08	0.807805	0.599421	0.665474	0.549415	0.522963
54	X - 21285	1345	TRUE	0.630418	0.100535	0.0763758	0.636428	0.106919	-0.0206567	0.00368331	-3.92845	-3.84894	0.000101305	0.176925	0.246241	2.21393e-34	0.166897	2.45092e-18	0.363225	0.044135	0.030017	0.467626	0.522963
630	pregnenolone sulfate	1345	TRUE	1.92644	0.0977226	-0.0705883	0.530142	-0.222634	-0.032154	-0.0204018	1.21051	2.22627	9.24982e-38	0.155861	0.246569	3.30798e-28	0.00185805	6.41873e-49	5.16888e-08	0.502469	0.17477	0.440141	0.522963
342	taurocholate	1345	TRUE	-0.450987	0.127226	-0.0823916	-0.0228015	0.119864	0.00132079	0.0137902	-6.13753	0.436353	0.0104316	0.115557	0.249324	0.686613	0.153545	0.60702	0.00171796	0.00377814	0.820771	0.393862	0.522963
15	hydroxyasparagine**	1345	TRUE	-3.34358	-0.148153	0.0655133	-0.00804571	-0.00718248	0.0367351	0.0563485	7.37599	-0.00222245	8.58246e-126	0.0213125	0.249792	0.858045	0.914439	3.18032e-72	2.77224e-58	1.2262e-05	0.998843	0.19096	0.522963
373	glycocholenate sulfate*	1345	TRUE	-0.500354	0.00870717	-0.0815916	0.255843	-0.150191	-0.00355059	0.0208943	0.895597	2.27851	0.0041592	0.913502	0.249915	4.97948e-06	0.0713122	0.163177	1.66153e-06	0.66995	0.232827	0.962939	0.522963
314	N1-methyladenosine	1345	TRUE	-1.79877	-0.0345223	0.0776717	0.355763	0.0289431	0.0182557	0.0267824	6.7145	0.449924	2.90836e-27	0.651195	0.250228	2.65079e-11	0.715227	5.2066e-14	1.14493e-10	0.000795103	0.804659	0.853027	0.522963
822	deoxycholate	1345	TRUE	-0.264062	-0.208354	0.0821929	0.101372	0.0810807	-0.000553265	0.00915706	-3.62483	-2.76818	0.133549	0.00992928	0.25027	0.0727398	0.334162	0.829347	0.0372827	0.0870518	0.150481	0.125305	0.522963
369	sphingomyelin (d18:1/20:2, d18:2/20:1, d16:1/22:2)*	1345	TRUE	-0.858224	-0.0682975	-0.0742776	-0.548658	-0.246943	0.000388689	0.0394056	0.135672	-0.929853	6.91452e-08	0.349874	0.250461	6.40678e-27	0.00113987	0.866982	3.6414e-23	0.943523	0.593181	0.654461	0.522963
570	glycoursodeoxycholate	1345	TRUE	-0.211489	-0.0862746	-0.080939	0.0388932	0.255211	-0.00610111	0.018349	-9.45509	-4.81655	0.223181	0.279113	0.251072	0.485203	0.00205797	0.0159704	2.32928e-05	6.04187e-06	0.0112047	0.589692	0.522963
172	gamma-glutamylphenylalanine	1345	TRUE	-2.27673	0.0232059	0.0712472	0.614196	0.170342	0.0155313	0.0440506	0.861295	-1.05962	3.52473e-50	0.740883	0.251122	5.7962e-36	0.0194664	3.22315e-12	8.57066e-31	0.639634	0.526212	0.891026	0.522963
497	linolenoylcarnitine (C18:3)*	1345	TRUE	-0.508027	0.182653	-0.0764993	0.544126	-0.119182	0.0133717	-0.0104516	-3.7177	-4.30092	0.00197394	0.0153943	0.251344	5.40921e-25	0.128061	2.34602e-08	0.0108276	0.059924	0.0166297	0.156742	0.522963
825	asparagine	1345	TRUE	1.27346	0.0866302	-0.0776149	0.156493	-0.075518	-0.000982696	-0.0453852	4.58456	0.56829	2.1551e-14	0.25757	0.251559	0.00343776	0.342125	0.685981	1.13462e-27	0.022275	0.755238	0.562832	0.522963
579	1-palmitoyl-2-stearoyl-GPC (16:0/18:0)	1345	TRUE	0.472847	-0.0773706	0.0804944	0.257681	-0.395505	0.0100658	-0.0365269	3.71816	0.267961	0.00633173	0.330566	0.25253	3.56115e-06	1.68924e-06	6.74536e-05	3.10558e-17	0.0744672	0.88752	0.641097	0.523767
713	4-allylphenol sulfate	1345	TRUE	0.033219	0.0280704	0.0778749	0.202661	-0.0474208	0.0125156	-0.0245976	-0.604801	3.46187	0.843659	0.716626	0.255012	0.000177748	0.555039	3.48848e-07	5.03853e-09	0.765443	0.0602474	0.875984	0.527691
510	trans-urocanate	1345	TRUE	0.429271	-0.0500241	-0.0807723	-0.234451	-0.0232182	-0.00838129	0.000748725	-0.00757412	-0.594036	0.0141501	0.53347	0.25572	2.98058e-05	0.780855	0.00102116	0.863985	0.99713	0.756263	0.781028	0.527939
852	1-margaroyl-GPE (17:0)*	1345	TRUE	0.40381	0.10848	-0.0794892	0.00999781	0.119203	0.00679384	-0.0280494	3.56025	-0.136875	0.0192463	0.170812	0.256622	0.856709	0.147444	0.00692637	7.57636e-11	0.0863928	0.942175	0.458226	0.528366
325	X - 11847	1345	TRUE	0.232924	-0.0980854	0.0785295	0.11949	-0.190687	0.00484897	-0.0155944	-6.98011	-4.97693	0.172166	0.21049	0.257106	0.0290945	0.0191154	0.0513074	0.000253063	0.000675126	0.00765308	0.512498	0.528366
352	X - 11315	1345	TRUE	0.71796	-0.0675231	0.072316	0.0600973	-0.131952	0.0149857	-0.0502837	1.38339	0.194854	5.94379e-06	0.353612	0.261453	0.237599	0.0810152	9.10258e-11	6.2098e-37	0.468457	0.910539	0.657427	0.535543
634	X - 23590	1345	TRUE	-1.2149	-0.128806	0.074503	-0.164597	0.0853965	0.00235198	0.0394039	2.60177	-1.86518	1.06623e-13	0.0861045	0.261795	0.00170457	0.273392	0.323819	4.90845e-22	0.185992	0.296854	0.344833	0.535543
717	1-palmitoyl-GPI (16:0)	1345	TRUE	-0.639774	-0.105262	0.0780125	-0.199477	-0.37177	0.0119551	0.0057979	5.48001	2.20281	0.000190203	0.181136	0.262589	0.000288772	5.46257e-06	1.73964e-06	0.175802	0.00791067	0.240133	0.471056	0.535944
27	5alpha-androstan-3beta,17beta-diol disulfate	1345	TRUE	-0.363745	-0.0237163	0.0684522	1.06489	0.200689	-0.00722194	0.010077	-2.68604	-5.89299	0.0157401	0.731645	0.263199	1.57769e-107	0.00521725	0.00101021	0.00740325	0.138423	0.000347864	0.887082	0.535968
876	3-methyl catechol sulfate (1)	1345	TRUE	-0.560194	-0.145226	0.0773078	0.392576	0.0925242	0.0142033	-0.0102077	8.02884	-0.724382	0.00100847	0.0633621	0.263914	6.99749e-13	0.254877	1.0869e-08	0.0164616	9.01351e-05	0.697483	0.304607	0.536206
546	phenylalanyltryptophan	1345	TRUE	-0.726214	0.0108548	0.0800668	-0.108555	-0.052112	0.00746505	0.0125199	0.0095788	-4.06749	4.13128e-05	0.893815	0.265744	0.0561945	0.537358	0.00385332	0.00466073	0.996415	0.0357784	0.959779	0.538704
545	laurate (12:0)	1345	TRUE	0.705251	0.071084	-0.0752231	-0.611512	-0.100101	-0.00105617	-0.0154545	2.42016	1.55312	2.52573e-05	0.355083	0.268638	5.23814e-30	0.21002	0.665322	0.0002196	0.229707	0.396373	0.657427	0.542467
843	oleoylcholine	1345	TRUE	0.153879	-0.140421	0.0755231	-0.0773695	-0.169963	0.0154186	-0.0301412	5.58751	1.7828	0.360814	0.0693285	0.269505	0.152273	0.0343393	3.41773e-10	7.75285e-13	0.0058327	0.333084	0.314434	0.542467
255	leucine	1345	TRUE	-1.27701	0.0880382	-0.0662432	1.04801	0.159361	-0.00133662	0.0331824	-5.99189	-3.50629	5.72587e-18	0.194618	0.269953	4.22188e-108	0.0238271	0.535293	2.58532e-19	0.000758262	0.0301372	0.494923	0.542467
28	maleate	1345	TRUE	-1.03277	0.0461652	0.0792783	0.0436129	0.349649	0.0150663	0.00965665	6.20436	1.41603	5.33697e-09	0.569882	0.270023	0.442544	3.43524e-05	5.278e-09	0.0289206	0.00357686	0.464422	0.811829	0.542467
771	4-hydroxyhippurate	1345	TRUE	-0.512392	-0.0564746	0.07794	-0.125776	0.220201	0.0115311	-0.000394482	-6.14776	1.68007	0.00344387	0.482561	0.273331	0.0252792	0.00840378	6.36983e-06	0.928168	0.00354502	0.380579	0.753265	0.546998
11	sphingomyelin (d18:1/18:1, d18:2/18:0)	1345	TRUE	-1.42806	-0.0689274	-0.0722115	-0.371581	-0.196949	0.00923628	0.0422167	-6.60168	1.2455	1.41887e-18	0.355128	0.273499	9.97183e-13	0.0109836	9.5834e-05	2.24884e-25	0.000728627	0.483084	0.657427	0.546998
366	cortisol	1345	TRUE	0.927536	-0.108488	0.0740477	-0.212729	0.0539958	0.00491795	-0.0364812	8.30097	1.7795	3.43106e-08	0.159812	0.278129	8.04737e-05	0.500669	0.044842	3.69264e-18	4.0759e-05	0.333133	0.444696	0.555019
349	4-hydroxyphenylpyruvate	1345	TRUE	-1.34945	-0.0516048	0.0729171	-0.0644867	0.24577	0.00661021	0.0363308	1.4397	3.69225	4.08839e-16	0.497992	0.279098	0.225756	0.0018931	0.00628111	1.81033e-18	0.470776	0.0418365	0.757556	0.555494
758	catechol sulfate	1345	TRUE	0.455765	0.0323437	-0.0734775	0.115214	0.00401285	0.0124959	-0.0376183	4.60309	-0.0253717	0.00644994	0.673727	0.279607	0.0319143	0.959898	3.03724e-07	2.24733e-19	0.02226	0.988939	0.860956	0.555494
654	3,4-methyleneheptanoate	1345	TRUE	-0.0688262	0.032101	-0.0769995	0.0825874	-0.0421258	-0.00506511	0.0108498	-5.87263	-4.16952	0.695597	0.691015	0.281164	0.143514	0.615615	0.0483304	0.0135428	0.00553768	0.0302321	0.860956	0.557351
105	1-stearoyl-GPE (18:0)	1345	TRUE	0.492669	-0.0244326	0.0735686	-0.0150005	-0.0452491	0.00597812	-0.0283685	4.06058	-2.2906	0.00345199	0.7521	0.282326	0.78146	0.573375	0.0149681	1.57537e-11	0.0452156	0.213863	0.891619	0.558003
606	deoxycholic acid glucuronide	1345	TRUE	-0.834399	-0.126954	0.0754064	0.302527	-0.0965835	0.00809241	0.0123678	10.4569	3.6603	1.3955e-06	0.10978	0.282961	4.99975e-08	0.241574	0.00133116	0.00419159	5.03568e-07	0.0529502	0.387696	0.558003
285	pyroglutamylvaline	1345	TRUE	-1.21778	-0.0705143	0.0759349	0.137102	0.0474173	0.0116417	0.020147	-0.771117	4.24933	2.83595e-12	0.37831	0.283529	0.0142702	0.568505	4.66821e-06	3.7197e-06	0.713218	0.0258471	0.67929	0.558003
878	caprate (10:0)	1345	TRUE	1.215	0.0217896	0.0708545	-0.572743	-0.122956	0.000849631	-0.0363272	2.0744	4.49924	8.49811e-14	0.770679	0.283984	5.94036e-28	0.113369	0.720478	4.19418e-19	0.289776	0.011525	0.89982	0.558003
114	X - 19438	1345	TRUE	-0.489411	0.103218	-0.0718018	0.505297	0.196404	-0.00581214	0.0213441	0.774939	-2.36031	0.00311759	0.174521	0.285666	1.93166e-21	0.0128856	0.0160819	2.46219e-07	0.697357	0.192476	0.464009	0.559956
569	X - 11522	1345	TRUE	0.0263167	0.0506827	0.070971	0.473216	-0.0782647	0.00929439	-0.0238247	-2.43107	-3.65555	0.872394	0.500476	0.286227	2.28415e-19	0.316614	0.000100359	5.85119e-09	0.217636	0.0413777	0.760045	0.559956
10	diacylglycerol (16:1/18:2 [2], 16:0/18:3 [1])*	1345	TRUE	-1.58292	0.126475	-0.070972	0.0735074	0.220913	-0.00157838	0.0576343	1.57777	-7.86915	7.00802e-22	0.0943245	0.288594	0.164239	0.00491084	0.51098	1.3108e-44	0.425924	1.24657e-05	0.361382	0.56072
599	sulfate of piperine metabolite C18H21NO3 (1)*	1345	TRUE	0.243953	-0.121964	0.0732972	0.414129	-0.0589229	-0.00364787	-0.00551389	-6.30296	-3.37577	0.152151	0.118924	0.289478	3.62135e-14	0.46838	0.142034	0.195094	0.00211137	0.070051	0.39465	0.56072
176	5,6-dihydrothymine	1345	TRUE	-1.05274	0.203767	-0.0754421	0.334489	-0.196222	0.0089281	0.0167954	4.51759	-1.11128	2.14235e-09	0.0116073	0.290855	3.09408e-09	0.0193145	0.000498777	0.000131597	0.0327946	0.56343	0.140422	0.56072
358	androsterone glucuronide	1345	TRUE	0.895412	0.0298468	-0.0621478	0.959272	0.0614609	-0.028908	0.00400072	9.95842	-0.864892	6.50785e-10	0.653791	0.291137	1.80311e-94	0.374014	1.41816e-42	0.269186	1.13882e-08	0.585392	0.85429	0.56072
521	3-hydroxymyristate	1345	TRUE	-0.0647349	0.0741819	-0.0727465	-0.139985	0.0346489	0.00491477	-0.00371912	-4.41556	2.57832	0.703648	0.342394	0.29259	0.0103786	0.66948	0.0476653	0.381642	0.0310895	0.166007	0.65091	0.56072
471	sebacate (C10-DC)	1345	TRUE	-0.271245	0.0726186	0.0733288	-0.00162073	-0.0455524	0.0150985	-0.0156271	-1.1171	-2.02815	0.114293	0.357128	0.293221	0.976546	0.578207	1.66474e-09	0.0002704	0.588928	0.280359	0.658409	0.56072
720	1-stearoyl-2-docosapentaenoyl-GPC (18:0/22:5n6)*	1345	TRUE	-0.457658	0.0874178	-0.071845	-0.120049	0.056719	-0.0120464	0.0373201	0.421704	6.25992	0.00654378	0.257936	0.293275	0.0262578	0.479863	9.20681e-07	6.89209e-19	0.835082	0.000672932	0.562832	0.56072
235	3-carboxy-4-methyl-5-propyl-2-furanpropanoate (CMPF)	1345	TRUE	-0.274447	-0.146931	0.0688197	0.211727	0.188452	0.0244369	-0.0340524	-3.27453	-2.29372	0.0889	0.0472838	0.293589	4.329e-05	0.0143229	2.84675e-25	2.91455e-17	0.0916917	0.193645	0.274999	0.56072
269	N-acetylalanine	1345	TRUE	-1.75378	-0.0620849	0.0735456	0.260095	0.0145908	0.0168559	0.0306041	2.90801	4.15432	2.71746e-24	0.432981	0.293748	2.61454e-06	0.859214	2.05627e-11	1.21254e-12	0.161196	0.0276457	0.730604	0.56072
407	X - 15728	1345	TRUE	0.571815	0.0997801	-0.0742339	0.0606969	-0.113898	0.00106751	-0.0222599	4.49563	3.67632	0.00102452	0.212024	0.293929	0.277478	0.170295	0.674229	3.10074e-07	0.0319463	0.0535958	0.513606	0.56072
895	gamma-glutamylglutamate	1345	TRUE	-1.964	-0.172616	-0.0669795	0.478897	0.163763	0.00984421	0.0458108	-5.25267	-4.1242	7.92594e-36	0.0167585	0.294112	2.24556e-21	0.0289392	1.75043e-05	1.87055e-31	0.00549145	0.0164477	0.165006	0.56072
613	(2 or 3)-decenoate (10:1n7 or n8)	1345	TRUE	0.408768	0.133407	-0.0741538	-0.210598	-0.115576	0.000954864	-0.0135226	-11.3942	-0.962693	0.0188261	0.0949719	0.294128	0.000162862	0.163804	0.706733	0.00186631	5.31688e-08	0.613027	0.361382	0.56072
590	erythritol	1345	TRUE	-0.544957	-0.0811003	0.0748419	0.0435838	0.0942632	0.0101943	0.00123042	3.76805	0.353623	0.00199613	0.316417	0.295992	0.441194	0.262352	7.35131e-05	0.779967	0.0757813	0.854515	0.625848	0.563075
792	myristoylcarnitine (C14)	1345	TRUE	-0.946938	0.122961	0.0723375	0.293478	-0.049608	0.0190869	-0.00312815	-1.75609	-0.734116	2.88863e-08	0.116621	0.29674	8.44501e-08	0.542293	1.74575e-14	0.46314	0.392611	0.694154	0.393862	0.563302
20	X - 11530	1345	TRUE	0.142088	0.0248197	0.0695354	0.498596	-0.108665	0.00590148	-0.0225808	-3.89743	-3.89687	0.388461	0.742827	0.298765	4.14399e-21	0.166745	0.0140444	4.09868e-08	0.0493531	0.0305906	0.891026	0.565948
52	cholate	1345	TRUE	-0.546061	-0.0354265	0.0731186	0.257261	-0.0336921	0.0047795	0.00711398	-4.52939	-3.74235	0.00167362	0.65698	0.300172	3.96565e-06	0.684353	0.059269	0.101208	0.0303125	0.0489406	0.85429	0.567413
117	X - 22789	1345	TRUE	0.194423	0.06667	-0.0734789	0.12995	-0.0930049	0.00430373	-0.0148558	-10.9975	0.406938	0.267119	0.4072	0.301807	0.0208332	0.265739	0.0921043	0.000687756	1.83229e-07	0.831835	0.709287	0.569303
226	1-myristoyl-2-arachidonoyl-GPC (14:0/20:4)*	1345	TRUE	-0.581504	0.0145201	0.0694966	-0.413463	0.091039	-0.000288438	0.0262296	7.62819	-0.219486	0.000476269	0.849301	0.303949	9.95286e-15	0.251491	0.90541	2.815e-10	0.000140046	0.90404	0.933849	0.570988
297	cys-gly, oxidized	1345	TRUE	-0.0446841	0.0782421	-0.0685153	0.423951	-0.141288	0.00201458	-0.00448213	8.09397	1.68608	0.785392	0.29904	0.303975	8.31742e-16	0.0710643	0.399896	0.274216	4.16263e-05	0.347552	0.610325	0.570988
125	1-methylnicotinamide	1345	TRUE	0.694456	-0.0314743	0.0720857	-0.15048	-0.0190058	0.00440792	-0.0294748	3.39411	-4.71095	5.93915e-05	0.69184	0.30483	0.00671176	0.817796	0.080541	8.97203e-12	0.102985	0.0127683	0.860956	0.571398
122	X - 21834	1345	TRUE	0.309656	-0.0152854	0.0727504	0.0936469	-0.0198692	0.00303157	-0.0170889	1.4619	4.47677	0.0767165	0.849068	0.305909	0.0953439	0.811793	0.234732	9.21293e-05	0.487471	0.0193078	0.933849	0.572221
104	3-(3-amino-3-carboxypropyl)uridine*	1345	TRUE	-2.13724	-0.0493028	0.0673699	0.430494	0.0049432	0.020903	0.0347268	3.99938	-1.08598	1.81297e-39	0.50895	0.307651	1.58814e-16	0.949177	1.18944e-18	1.22772e-17	0.0409674	0.541432	0.766419	0.574283
496	X - 12680	1345	TRUE	-0.890278	-0.146668	0.0700692	0.132961	0.102161	0.0101131	0.012068	2.85088	2.89318	1.55657e-07	0.0597971	0.309403	0.014648	0.206946	4.38843e-05	0.00441944	0.162793	0.11911	0.304607	0.576351
295	phosphatidylcholine (16:0/22:5n3, 18:1/20:4)*	1345	TRUE	-0.0638163	0.0903433	0.0733476	-0.0332437	-0.00685501	0.00902645	-0.0133417	0.479124	2.06423	0.720108	0.269231	0.310617	0.560861	0.935686	0.00051043	0.00271062	0.823128	0.289322	0.575731	0.577062
5	tryptophan	1345	TRUE	0.0425044	0.115181	-0.0660563	0.670872	-0.00315078	-0.00800786	0.00384072	2.40438	-1.17798	0.791205	0.118147	0.311072	9.49309e-39	0.967181	0.000625866	0.338235	0.213371	0.502353	0.393862	0.577062
443	N-palmitoylglycine	1345	TRUE	-0.456052	0.085377	-0.0707169	-0.297721	-0.143469	0.00791605	0.00506913	4.31236	1.50862	0.00819967	0.281039	0.312836	7.55841e-08	0.081222	0.00165165	0.239452	0.0377898	0.42398	0.589692	0.579134
346	1-pentadecanoyl-2-arachidonoyl-GPC (15:0/20:4)*	1345	TRUE	-0.529993	0.219068	-0.0697524	-0.181383	0.20033	-0.00641544	0.0299858	9.80829	4.38254	0.00187304	0.00511717	0.313644	0.000913647	0.0137305	0.009849	1.88066e-12	1.73839e-06	0.018731	0.093571	0.579433
508	1-pentadecanoyl-2-docosahexaenoyl-GPC (15:0/22:6)*	1345	TRUE	0.515763	0.0843069	-0.0680422	-0.259679	-0.150659	0.0163	-0.0404253	0.868562	-0.796388	0.0019607	0.270331	0.314597	1.19225e-06	0.0579483	1.95311e-11	2.61332e-22	0.664851	0.662062	0.576705	0.579997
615	X - 11850	1345	TRUE	-0.151243	0.0267277	-0.070543	-0.190485	0.00297425	0.0128467	-0.0150786	6.02681	5.16074	0.382879	0.736968	0.316324	0.000616615	0.971301	3.72745e-07	0.000496521	0.0038625	0.00648622	0.889591	0.580191
63	sphingomyelin (d18:1/25:0, d19:0/24:1, d20:1/23:0, d19:1/24:0)*	1345	TRUE	-0.609583	-0.0424119	-0.069122	0.26287	-0.256021	0.00606067	0.0107786	3.37682	-1.25371	0.000333274	0.586638	0.316508	1.43045e-06	0.00158172	0.0144423	0.011095	0.0986456	0.499911	0.815256	0.580191
562	glycochenodeoxycholate 3-sulfate	1345	TRUE	-0.0331802	0.00715979	0.0707194	0.274593	0.0229075	-0.00562345	0.00686457	-7.82747	-1.25848	0.848658	0.928534	0.316645	8.62942e-07	0.782385	0.0265741	0.113999	0.000183614	0.508152	0.9742	0.580191
839	octadecadienedioate (C18:2-DC)*	1345	TRUE	1.1004	-0.00751332	-0.0712918	0.0136981	-0.135961	-0.000655312	-0.0356585	1.00195	1.33946	3.64818e-10	0.925729	0.317382	0.807912	0.104431	0.797975	4.23918e-16	0.635329	0.485441	0.972395	0.580334
740	X - 15486	1345	TRUE	-1.55556	-0.159912	0.0674958	0.198741	-0.0624047	0.0102382	0.0366038	-3.12455	-2.69559	9.49569e-21	0.0364726	0.318315	0.000200349	0.432056	2.48794e-05	1.37352e-18	0.11898	0.138891	0.247779	0.580334
527	dehydroepiandrosterone sulfate (DHEA-S)	1345	TRUE	1.89525	0.119182	-0.0573678	0.650233	-0.188428	-0.0401814	-0.00675703	-4.01902	-3.93989	1.01953e-40	0.0672459	0.319387	2.81355e-46	0.00535341	4.84251e-84	0.0565281	0.0185626	0.0111065	0.309194	0.580334
738	6-oxopiperidine-2-carboxylate	1345	TRUE	-0.754385	0.00439054	0.0713102	0.0699086	0.160373	0.00485324	0.0172318	1.41665	6.00016	1.88843e-05	0.956756	0.319475	0.216792	0.0565815	0.0591544	9.17013e-05	0.504481	0.0018675	0.980911	0.580334
704	1-palmityl-2-arachidonoyl-GPC (O-16:0/20:4)*	1345	TRUE	0.316182	-0.0533837	0.0683449	0.341108	-0.0731444	-0.0113123	0.0029315	1.01114	4.63725	0.0616504	0.491936	0.319961	3.34985e-10	0.364744	4.54663e-06	0.487924	0.619492	0.0122184	0.757344	0.580334
556	aspartate	1345	TRUE	-1.0373	0.198613	-0.0618045	0.405577	0.0543237	-0.00284414	0.0365938	1.18654	-5.01513	1.5897e-11	0.00494507	0.322848	2.20944e-16	0.459327	0.205125	1.77061e-21	0.521818	0.00289268	0.0923079	0.584388
682	behenoyl sphingomyelin (d18:1/22:0)*	1345	TRUE	-0.805228	-0.0690457	0.0688325	0.0454658	-0.598747	0.0130442	0.00900197	-0.207531	-0.643403	2.91782e-06	0.382448	0.325014	0.410675	3.09391e-13	2.05119e-07	0.0363599	0.920229	0.732637	0.680867	0.586104
61	sphinganine	1345	TRUE	-0.39319	0.272518	-0.0649812	0.00750789	-0.103858	-0.000311675	0.0142887	3.46239	-1.45838	0.0155885	0.000261387	0.325105	0.885595	0.180488	0.895419	0.000434432	0.0768118	0.412174	0.0156135	0.586104
764	S-methylcysteine sulfoxide	1345	TRUE	1.1005	0.122828	-0.0659922	-0.155755	-0.141264	0.00561813	-0.044029	3.77663	1.21843	3.07092e-11	0.106328	0.326707	0.00339587	0.0738128	0.0200471	1.94923e-26	0.058194	0.501318	0.384341	0.58781
684	urate	1345	TRUE	-1.88816	-0.128417	0.0560054	0.948563	0.113176	0.00344258	0.0500526	-6.82129	-1.94663	5.34554e-41	0.0469954	0.327471	8.3276e-98	0.0919795	0.0936582	6.00586e-46	5.69582e-05	0.206278	0.274999	0.588003
374	gamma-glutamyl-alpha-lysine	1345	TRUE	-1.21394	-0.13105	-0.0664539	0.439397	0.0431893	0.0113574	0.0187807	-2.73841	-5.0764	4.81562e-13	0.0891121	0.329815	3.51576e-16	0.589674	3.50904e-06	7.53574e-06	0.175347	0.00570531	0.34715	0.589595
841	sphingosine 1-phosphate	1345	TRUE	0.319665	0.249321	-0.0703886	0.141337	-0.223258	-0.00193243	-0.00798156	6.67019	-0.429011	0.0724274	0.00227551	0.330116	0.0133338	0.00852919	0.456485	0.0725616	0.00184219	0.825549	0.0636025	0.589595
162	3-hydroxydecanoate	1345	TRUE	-0.118251	0.117964	-0.0698668	-0.0501631	-0.0179823	0.00581253	-0.00480863	-8.73039	2.47282	0.503366	0.145941	0.330331	0.376432	0.831054	0.0240994	0.27599	4.04028e-05	0.200762	0.433672	0.589595
620	(16 or 17)-methylstearate (a19:0 or i19:0)	1345	TRUE	-0.458366	0.141303	0.0685255	-0.245744	-0.00634514	0.0078288	0.00375813	-0.109438	1.22741	0.00890761	0.0790521	0.335691	1.24743e-05	0.939492	0.00218935	0.390628	0.958618	0.521959	0.332016	0.59797
617	sphingomyelin (d18:2/24:1, d18:1/24:2)*	1345	TRUE	-0.0590941	-0.0434695	0.0636936	-0.398935	-0.688066	0.0119317	-0.00997309	-3.80884	0.888826	0.717973	0.56282	0.337855	3.03746e-14	1.18173e-18	5.72223e-07	0.014685	0.0530866	0.619445	0.807298	0.600631
312	1-stearoyl-2-dihomo-linolenoyl-GPC (18:0/20:3n3 or 6)*	1345	TRUE	-1.63447	0.0414276	-0.0615116	-0.160528	0.0358046	0.00186752	0.0573482	9.23655	0.182139	7.81244e-25	0.569988	0.340372	0.00163921	0.636512	0.420129	2.39193e-47	1.35395e-06	0.916508	0.811829	0.603103
163	X - 11787	1345	TRUE	-0.774427	-0.0905204	0.0665977	0.519308	0.00965332	0.0156616	-0.00545978	-1.97822	-4.06513	6.89044e-06	0.252256	0.341033	5.68592e-21	0.906447	4.48493e-10	0.204376	0.339842	0.0309179	0.562832	0.603103
310	1-palmityl-2-stearoyl-GPC (O-16:0/18:0)*	1345	TRUE	0.123061	0.169596	0.0685393	-0.118651	-0.539972	0.00516555	-0.0110106	4.3848	1.40502	0.487664	0.0372275	0.341265	0.0370791	1.72012e-10	0.0457606	0.0129253	0.0399065	0.468803	0.250796	0.603103
675	orotidine	1345	TRUE	-1.85543	-0.0704187	0.0628036	0.572209	0.0894727	0.0147111	0.0330598	1.12902	-2.00416	4.13287e-30	0.345963	0.342057	6.29155e-28	0.249067	5.70474e-10	4.21884e-16	0.564324	0.26022	0.653182	0.603313
646	(S)-a-amino-omega-caprolactam	1345	TRUE	-1.58864	-0.00578235	0.0618083	0.541212	0.0235026	0.0187662	0.0166867	6.9584	-0.47939	1.55698e-22	0.93828	0.349489	3.48943e-25	0.761936	2.54421e-15	4.00918e-05	0.000378451	0.787578	0.979188	0.611544
323	1-oleoylglycerol (18:1)	1345	TRUE	-1.18383	0.0989188	0.0666855	0.298561	0.072156	0.0175043	0.00685633	0.768398	-1.43416	1.58056e-11	0.219937	0.349902	1.18138e-07	0.389071	8.26551e-12	0.118117	0.716222	0.455353	0.515141	0.611544
760	X - 21441	1345	TRUE	0.936344	-0.091773	0.0646094	0.241076	0.0223469	-0.0230362	0.00184376	-5.52711	1.11426	4.12289e-08	0.241589	0.351392	1.08058e-05	0.783724	2.16433e-20	0.665449	0.00713569	0.550647	0.549415	0.611544
412	X - 24849	1345	TRUE	0.299908	0.078354	0.061824	0.501031	-0.108948	0.00387579	-0.0246604	-2.95503	-3.67508	0.0663704	0.296157	0.351453	1.22156e-21	0.162044	0.10376	1.51084e-09	0.132829	0.0397077	0.607224	0.611544
194	gamma-glutamyltyrosine	1345	TRUE	-2.00763	-0.0938214	0.0575858	0.522524	0.0628848	0.0173191	0.0361514	-0.124437	0.0926422	1.10965e-39	0.179669	0.351895	1.13593e-26	0.386675	6.30526e-15	2.0502e-21	0.945874	0.95565	0.46934	0.611544
466	metabolonic lactone sulfate	1345	TRUE	-2.34143	0.0648865	-0.0564258	0.320422	-0.0401352	0.00107697	0.0774933	5.12346	-8.71767	2.11186e-55	0.343967	0.352243	2.30741e-11	0.573132	0.620951	7.60319e-96	0.00436341	9.4561e-08	0.651574	0.611544
808	gamma-glutamylthreonine	1345	TRUE	-0.449624	-0.052026	0.0662733	0.249045	0.0274538	0.00703055	-0.000287371	5.35498	3.01389	0.0106746	0.519927	0.354172	1.05199e-05	0.743793	0.00619087	0.947916	0.0115178	0.117668	0.770883	0.611544
858	X - 24546	1345	TRUE	1.54434	0.0697717	0.0561536	0.606775	-0.140661	-0.0375101	0.000835499	-9.10797	-1.66351	4.26151e-25	0.308538	0.354246	8.89512e-37	0.048152	1.45537e-66	0.822667	3.95801e-07	0.308169	0.613696	0.611544
36	1-(1-enyl-stearoyl)-2-arachidonoyl-GPC (P-18:0/20:4)	1345	TRUE	0.219249	-0.0399995	0.0653688	0.228307	-0.129048	0.000166072	-0.0117971	-1.79727	8.76376	0.206977	0.616062	0.354288	4.23632e-05	0.119427	0.947742	0.00656506	0.390059	3.99809e-06	0.835085	0.611544
561	X - 11795	1345	TRUE	-0.0685114	-0.0836331	0.0648267	0.363027	0.0603397	0.00274766	-0.00727958	4.38649	-2.43267	0.69091	0.290425	0.354293	5.22163e-11	0.462838	0.274193	0.0907841	0.0344064	0.196788	0.600972	0.611544
709	X - 17357	1345	TRUE	-1.90857	0.0810401	-0.0615614	0.539932	0.0247382	0.0119685	0.0400861	-1.95502	-3.50504	2.56454e-31	0.281683	0.355277	1.06429e-24	0.751759	5.57551e-07	1.27762e-22	0.321812	0.0506549	0.589692	0.611544
566	arachidate (20:0)	1345	TRUE	0.426329	0.141004	0.0619001	0.128172	-0.173528	0.00982964	-0.0340905	2.14987	2.66226	0.00974671	0.0626129	0.355518	0.0154738	0.0274117	4.38238e-05	1.29877e-16	0.278817	0.140051	0.304607	0.611544
656	1-linoleoylglycerol (18:2)	1345	TRUE	-1.20998	-0.138912	-0.0645266	0.244349	-0.04671	0.0179547	0.0113448	-1.39343	-0.439866	1.97907e-12	0.0785175	0.355597	9.55427e-06	0.569056	8.12185e-13	0.00827004	0.500789	0.815108	0.332016	0.611544
59	1-margaroyl-GPC (17:0)	1345	TRUE	0.700962	0.0628787	-0.0589631	0.284646	-0.19211	0.0102523	-0.0458486	4.9916	-0.809716	9.96108e-06	0.388034	0.360212	2.2738e-08	0.0111327	9.38663e-06	5.98065e-31	0.00894707	0.640804	0.684407	0.618188
384	glucuronide of piperine metabolite C17H21NO3 (3)*	1345	TRUE	-1.01542	-0.206416	0.0629824	0.26531	0.107181	0.00190403	0.0310707	-5.90831	-3.32328	2.1861e-09	0.00806894	0.360872	1.11101e-06	0.185481	0.441705	2.31695e-13	0.0038193	0.0734098	0.114983	0.618188
640	ornithine	1345	TRUE	-0.865826	-0.0311195	0.0606686	0.509484	-0.0385222	0.0202092	-0.00894086	4.59526	-2.83162	1.22866e-07	0.678833	0.36153	3.10036e-22	0.621758	2.55524e-17	0.0287826	0.0196769	0.113781	0.860956	0.618188
765	dihomo-linolenate (20:3n3 or n6)	1345	TRUE	-0.852675	0.132188	-0.0604905	-0.243019	0.0343716	0.00355584	0.0260747	1.54343	0.165494	1.91863e-07	0.0787124	0.363105	3.76645e-06	0.6599	0.136496	1.83819e-10	0.433545	0.926385	0.332016	0.619146
619	branched-chain, straight-chain, or cyclopropyl 12:1 fatty acid*	1345	TRUE	0.185668	0.14679	-0.0650722	-0.341196	-0.0655292	0.00101063	-0.00385638	-6.69273	1.7176	0.292562	0.0699216	0.363776	1.6772e-09	0.436101	0.694435	0.3815	0.00161934	0.373377	0.314823	0.619146
681	docosahexaenoylcarnitine (C22:6)*	1345	TRUE	-0.0418814	-0.00658636	0.0603346	0.25811	0.125898	0.0205659	-0.0362768	-7.42115	-1.76813	0.798063	0.930165	0.364163	8.97617e-07	0.106864	6.99476e-18	7.20635e-19	0.000165263	0.323393	0.97477	0.619146
47	1-(1-enyl-oleoyl)-GPC (P-18:1)*	1345	TRUE	0.673985	-0.0423137	0.0610381	0.0736778	-0.408516	0.0074442	-0.0370772	-0.623732	0.836578	5.08327e-05	0.579549	0.366309	0.167579	2.62284e-07	0.00215037	4.54434e-19	0.755378	0.64567	0.813233	0.621228
879	X - 13866	1345	TRUE	0.198576	-0.104185	0.0618058	0.167432	0.0198546	0.0137094	-0.0302601	-6.75738	0.877967	0.238877	0.178328	0.366774	0.0019739	0.804995	2.46576e-08	6.72874e-13	0.00086791	0.634019	0.468569	0.621228
64	X - 11632	1345	TRUE	-0.180767	-0.0109637	-0.0651043	0.210936	0.0978161	0.002918	-7.56837e-05	2.7339	-1.4159	0.311109	0.893556	0.36911	0.000230877	0.250521	0.262221	0.986455	0.203074	0.46825	0.959779	0.624004
289	stearoylcarnitine (C18)	1345	TRUE	-0.429919	0.0297889	0.0586859	0.625765	-0.183049	0.0207509	-0.0274578	-2.40026	-1.1533	0.00794184	0.688705	0.372327	2.23271e-33	0.0178101	1.55534e-18	1.14586e-11	0.218167	0.515028	0.860956	0.628259
543	4-hydroxychlorothalonil	1345	TRUE	-0.215137	0.158974	-0.0627827	0.032941	0.0701587	0.00581825	-0.00476882	4.717	-2.72841	0.220364	0.0485529	0.378566	0.558767	0.402081	0.0230429	0.276811	0.0255686	0.155325	0.275338	0.637216
882	5-acetylamino-6-amino-3-methyluracil	1345	TRUE	-0.526104	-0.119172	0.0604735	0.0790384	-0.0391827	0.0106598	0.000417187	6.83095	-1.76588	0.00189431	0.125383	0.379357	0.145942	0.627658	1.59058e-05	0.92145	0.000804612	0.34048	0.407041	0.637216
441	hypotaurine	1345	TRUE	0.285377	0.221462	-0.0606926	0.0922792	-0.0252225	0.0010822	-0.0177632	5.57314	-0.598691	0.0934556	0.00457849	0.379769	0.0910266	0.755936	0.662703	2.91796e-05	0.0064906	0.74766	0.0911628	0.637216
835	X - 17340	1345	TRUE	-1.75095	-0.00142118	0.0564887	0.775445	-0.12634	0.00701388	0.0410247	-1.6209	-3.33562	2.65181e-28	0.984439	0.380853	2.45998e-52	0.0951211	0.00244193	4.26617e-25	0.396091	0.0546654	0.991075	0.63784
159	gamma-glutamylleucine	1345	TRUE	-1.70174	-0.0843345	-0.0506516	1.05712	0.188305	0.00447891	0.0379526	-2.89256	-2.63644	9.74521e-33	0.198363	0.382541	1.07996e-117	0.00570289	0.0315119	1.96871e-26	0.092385	0.091453	0.497852	0.639471
284	cerotoylcarnitine (C26)*	1345	TRUE	-0.826905	0.0650991	0.0565066	0.788231	-0.329539	0.0166727	-0.00842006	-4.53513	-1.74064	2.3763e-07	0.375607	0.384663	3.73919e-53	1.58022e-05	9.06839e-13	0.0351796	0.0185381	0.320024	0.67579	0.641791
197	X - 24295	1345	TRUE	-0.232255	0.0569315	-0.0588786	0.489232	0.173733	-0.0073387	0.015698	-0.836459	-2.35752	0.164283	0.457754	0.385361	6.97984e-20	0.0291736	0.0025834	0.000167799	0.67727	0.19682	0.739545	0.641791
359	taurodeoxycholate	1345	TRUE	-0.0385663	0.0520142	-0.0610172	-0.177137	0.22803	0.00298039	-0.0016579	0.43425	0.746152	0.82401	0.513575	0.386346	0.0014599	0.00583814	0.238613	0.701935	0.835181	0.694053	0.769504	0.642238
550	4-allylcatechol sulfate	1345	TRUE	0.483127	0.073044	-0.0612266	0.0621552	-0.0299069	0.00268247	-0.0225683	2.69923	1.37768	0.00578644	0.363481	0.389219	0.268649	0.720235	0.293417	2.46275e-07	0.200166	0.47187	0.660606	0.64479
268	X - 18921	1345	TRUE	-0.00524831	-0.0118797	-0.0604615	0.24628	-0.150719	-0.00393754	0.00446876	-6.94165	-4.99246	0.975787	0.881052	0.389321	9.09866e-06	0.0676462	0.118427	0.300882	0.000851342	0.00830173	0.955718	0.64479
209	hydroquinone sulfate	1345	TRUE	-0.429255	0.0354453	0.0613417	0.17107	0.0600383	0.000321067	0.0119969	1.01555	-3.36693	0.014675	0.66074	0.39058	0.00244459	0.474257	0.900399	0.00632899	0.631436	0.0801321	0.85429	0.645682
444	glucuronide of piperine metabolite C17H21NO3 (5)*	1345	TRUE	-0.992016	-0.206445	0.0590089	0.26956	0.0824138	0.00280655	0.028907	-5.86334	-3.39629	5.21095e-09	0.00811561	0.392381	7.63163e-07	0.309054	0.257223	9.5763e-12	0.00412846	0.0675498	0.114983	0.647464
581	palmitoylcholine	1345	TRUE	0.0707314	-0.149552	0.0584462	-0.0414755	-0.174411	0.0139315	-0.0254842	4.96435	1.1969	0.675969	0.0542501	0.395152	0.445091	0.030716	1.65163e-08	1.65516e-09	0.0147903	0.51788	0.29579	0.650838
874	glycochenodeoxycholate glucuronide (1)	1345	TRUE	0.16208	-0.0292979	0.059293	0.424765	0.121376	-0.00868669	0.00285767	-0.906049	1.31452	0.34656	0.710941	0.39656	1.51914e-14	0.139459	0.000541729	0.506458	0.661961	0.485219	0.871856	0.65085
461	1-(1-enyl-palmitoyl)-GPC (P-16:0)*	1345	TRUE	0.897293	-0.0803497	0.0560538	0.304206	-0.370506	0.0058019	-0.0453629	2.8314	2.73142	3.59919e-08	0.282574	0.396793	5.89624e-09	1.84752e-06	0.0145758	7.15303e-29	0.148595	0.125209	0.590096	0.65085
767	3-phenylpropionate (hydrocinnamate)	1345	TRUE	0.959229	0.040721	-0.0571455	-0.0752465	-0.06995	0.00833818	-0.046318	11.2816	3.27162	8.14861e-09	0.593979	0.397765	0.158801	0.378086	0.000589412	7.62519e-29	1.76039e-08	0.0722209	0.818777	0.65085
96	1,3-dimethylurate	1345	TRUE	-0.534134	-0.0441903	0.0584986	0.0456869	-0.00179643	0.00889084	0.00368682	8.98599	-1.61804	0.00173198	0.572412	0.398276	0.403791	0.982377	0.000349447	0.386701	1.19192e-05	0.385617	0.81212	0.65085
699	3-hydroxylaurate	1345	TRUE	-0.045205	0.138675	-0.0602682	-0.187232	-0.0673004	0.00513533	-0.0043702	-6.38361	3.05379	0.797427	0.0863421	0.399498	0.000925136	0.423044	0.0455628	0.320535	0.00259781	0.112911	0.344833	0.65085
417	21-hydroxypregnenolone disulfate	1345	TRUE	1.20649	0.120339	-0.0538437	0.494578	-0.170344	-0.0316308	0.00461689	-0.00724086	-2.65152	1.75178e-14	0.0957607	0.399517	1.20339e-22	0.0232291	3.17248e-43	0.240155	0.996949	0.123416	0.361382	0.65085
801	arachidonate (20:4n6)	1345	TRUE	-0.24154	0.0685693	-0.0549989	-0.0230576	0.136647	0.00252937	0.00196855	2.63871	5.58402	0.140147	0.361682	0.408225	0.660823	0.080167	0.289462	0.630297	0.180541	0.00182079	0.660014	0.663828
784	laurylcarnitine (C12)	1345	TRUE	0.00630471	0.0776374	-0.0577386	0.189977	-0.0861488	0.00880369	-0.0164503	-5.19984	1.67627	0.971031	0.330048	0.412896	0.000650964	0.298187	0.000506753	0.000148737	0.0128236	0.377383	0.641097	0.669555
506	2-oleoyl-GPC (18:1)*	1345	TRUE	0.765017	0.0480461	0.0510455	0.202591	-0.082725	0.0141486	-0.0546209	8.22606	2.90279	6.60112e-07	0.496362	0.413982	4.07835e-05	0.259597	2.85831e-10	7.60598e-46	8.87742e-06	0.0845225	0.757556	0.669555
409	2-oleoyl-GPE (18:1)*	1345	TRUE	0.280389	0.059345	0.0578001	0.146113	0.103499	0.00189308	-0.0172139	7.63446	1.79905	0.107492	0.458089	0.413988	0.00896669	0.212907	0.456173	7.62889e-05	0.000271128	0.345084	0.739545	0.669555
805	proline	1345	TRUE	-1.07788	-0.0684123	-0.0538075	0.548469	0.321749	-0.00297118	0.0344846	0.86236	1.07466	4.75219e-11	0.363131	0.418792	1.8173e-25	3.83997e-05	0.21371	3.59816e-17	0.661885	0.548751	0.660606	0.675415
307	1-margaroyl-2-linoleoyl-GPC (17:0/18:2)*	1345	TRUE	0.396618	0.0388606	0.0565787	-0.181309	-0.483088	0.0127183	-0.0304955	-7.45346	-5.20216	0.0214375	0.623515	0.419174	0.00105228	4.26156e-09	4.24344e-07	1.44208e-12	0.000328597	0.00581151	0.837586	0.675415
364	2-arachidonoyl-GPE (20:4)*	1345	TRUE	-0.33636	0.103798	0.0572966	0.118589	0.238142	0.00139381	0.00404982	5.40768	3.19881	0.0544312	0.196091	0.419873	0.0346161	0.00430476	0.584715	0.353902	0.0101898	0.0944709	0.494923	0.675415
251	spermidine	1345	TRUE	-0.121249	0.161279	-0.0570434	0.344402	-0.0389838	-0.00341632	0.00281709	0.992312	-2.524	0.487448	0.0442527	0.421233	7.98673e-10	0.639748	0.179743	0.518389	0.636799	0.186342	0.271772	0.676389
498	X - 18901	1345	TRUE	1.10553	0.116574	-0.0514211	-0.256605	-0.0440889	0.00364847	-0.040675	11.165	-2.60517	2.41959e-12	0.107512	0.422263	4.02052e-07	0.557928	0.112776	5.63089e-25	4.08843e-09	0.131106	0.386871	0.67683
481	X - 11261	1345	TRUE	-1.7437	-0.0796414	0.0525522	0.310661	0.247283	0.00690475	0.0450865	-10.8575	-5.59158	4.61303e-27	0.283852	0.424076	2.22956e-09	0.00136006	0.00344282	7.07469e-29	2.49387e-08	0.00158674	0.590096	0.677634
488	1-palmitoyl-2-docosahexaenoyl-GPC (16:0/22:6)	1345	TRUE	0.474056	0.0451456	0.0543816	-0.0904737	-0.00101667	0.0165868	-0.0431175	-5.06698	0.774178	0.00473254	0.55794	0.424998	0.0930242	0.989867	1.22675e-11	8.24611e-25	0.0121203	0.673219	0.804421	0.677634
264	6-hydroxyindole sulfate	1345	TRUE	-0.214308	-0.0603875	0.0559416	0.168146	0.240444	0.00369828	-0.00124845	4.89358	-2.1234	0.214509	0.446178	0.425034	0.00241034	0.00350398	0.14189	0.772223	0.018521	0.260852	0.736031	0.677634
293	1-stearoyl-GPI (18:0)	1345	TRUE	-0.680254	-0.0919722	0.0546477	-0.100289	-0.251267	0.0179909	-0.00513627	1.3019	3.17054	6.06947e-05	0.237646	0.427701	0.0654717	0.00190035	3.53527e-13	0.225478	0.523678	0.0875019	0.548791	0.6799
647	quinate	1345	TRUE	-0.161357	-0.0298271	0.0563125	0.064872	-0.110207	0.0118665	-0.0150393	7.20918	-1.35839	0.356249	0.710317	0.427973	0.247843	0.186503	3.28544e-06	0.000577167	0.000615402	0.477686	0.871856	0.6799
831	taurochenodeoxycholate	1345	TRUE	-0.291185	0.0814774	-0.0557349	-0.0113816	0.182346	0.000661145	0.00969755	-6.22108	-0.623767	0.095002	0.308903	0.431408	0.838878	0.0283832	0.794912	0.0260213	0.00303857	0.743685	0.613696	0.682988
616	3-formylindole	1345	TRUE	0.723043	0.0640783	0.0542797	0.50697	0.0875126	-0.007802	-0.0199907	8.80481	-3.26655	2.07568e-05	0.411285	0.431441	1.4178e-20	0.280098	0.00163566	2.46294e-06	1.65572e-05	0.0787305	0.712788	0.682988
834	palmitoyl-arachidonoyl-glycerol (16:0/20:4) [2]*	1345	TRUE	-1.42307	0.0366371	0.0514874	0.267423	0.428664	-0.00509972	0.0534825	0.203162	3.66896	1.22442e-18	0.621198	0.432463	2.47323e-07	2.61812e-08	0.0303522	4.04308e-40	0.916745	0.0377872	0.837586	0.683398
178	2-aminoheptanoate	1345	TRUE	-0.96771	-0.0750988	-0.0543072	0.158968	0.133804	0.00757595	0.019178	-3.01791	2.47943	1.62407e-08	0.339754	0.435185	0.00384332	0.101586	0.00243028	7.43841e-06	0.14333	0.185846	0.650468	0.68541
402	3-indoxyl sulfate	1345	TRUE	-0.0497575	-0.0694247	0.0547709	0.112124	0.265008	0.000145256	-0.000271647	6.37938	-2.16131	0.773428	0.38163	0.435266	0.0432496	0.00130626	0.954044	0.949831	0.00216306	0.252929	0.680867	0.68541
227	1-linoleoyl-GPG (18:2)*	1345	TRUE	-0.676724	0.105364	-0.0559572	0.13321	0.00938034	-0.00175641	0.0246884	-2.7716	1.07264	0.000136607	0.195847	0.437455	0.0193196	0.911741	0.497253	2.54082e-08	0.194292	0.580456	0.494923	0.687648
250	cinnamoylglycine	1345	TRUE	0.669093	-0.0193123	0.0499851	-0.329715	-0.190613	0.0154412	-0.0445851	14.8247	3.89948	2.56122e-05	0.791298	0.438808	1.02773e-10	0.0119353	2.71896e-11	2.95626e-29	9.24631e-15	0.0249101	0.910145	0.687854
845	glucuronide of piperine metabolite C17H21NO3 (4)*	1345	TRUE	-0.946679	-0.193357	0.0532805	0.296297	0.0900965	0.00187117	0.0278411	-4.70641	-3.3565	2.35729e-08	0.0129957	0.439121	5.18481e-08	0.265256	0.449201	4.91674e-11	0.0210874	0.070317	0.148994	0.687854
42	sphingomyelin (d18:0/20:0, d16:0/22:0)*	1345	TRUE	-1.17098	0.00111531	0.0520963	-0.134002	-0.134586	0.00287378	0.039714	0.956403	-3.40908	1.8067e-12	0.988333	0.440075	0.0119647	0.0894233	0.235557	1.0708e-21	0.632403	0.0606444	0.991282	0.688146
93	X - 21319	1345	TRUE	0.270962	-0.017876	-0.0540441	0.166699	0.0433612	-0.00804864	0.00260879	-7.83219	-3.9014	0.117906	0.822228	0.442592	0.00272487	0.599868	0.0014486	0.54674	0.000173091	0.0395653	0.92734	0.690875
455	perfluorooctanoate (PFOA)	1345	TRUE	-0.537583	-0.222716	0.0482498	0.601751	0.103778	0.018159	-0.0186069	-3.27812	-1.85951	0.000566798	0.00186819	0.446239	2.72716e-33	0.162991	1.41574e-15	1.78691e-06	0.0807244	0.275684	0.0557967	0.695357
580	uridine	1345	TRUE	-0.056	0.0469463	0.0523224	0.328039	-0.122569	0.00553116	-0.00994008	-7.17241	-3.49654	0.743197	0.549696	0.451066	2.23755e-09	0.132747	0.026494	0.019913	0.000489283	0.0614603	0.799558	0.701658
642	X - 11849	1345	TRUE	-0.019514	-0.145741	0.0513624	-0.0382651	-0.10392	0.00379161	-0.00253925	-10.136	-8.08274	0.90802	0.0601876	0.454039	0.480263	0.197073	0.123726	0.547281	6.15334e-07	1.21386e-05	0.304607	0.70377
542	O-sulfo-L-tyrosine	1345	TRUE	-0.798398	-0.150732	0.0520244	0.179875	0.128194	0.0149016	0.00185791	8.50901	-2.61299	3.10135e-06	0.0551304	0.454322	0.00106072	0.116413	2.38652e-09	0.663944	3.62584e-05	0.162864	0.29579	0.70377
116	glycerate	1345	TRUE	0.859369	0.00626193	0.0490634	-0.217173	-0.21722	0.0123083	-0.0453235	5.949	0.621156	1.05067e-07	0.932741	0.45478	2.82599e-05	0.0048323	1.76521e-07	2.99636e-29	0.00222302	0.725287	0.976327	0.70377
870	octadecenedioylcarnitine (C18:1-DC)*	1345	TRUE	-0.415244	0.0690074	-0.0519769	0.366574	-0.0502386	0.0124622	-0.0110712	-0.848824	-0.796383	0.015943	0.382988	0.457623	3.372e-11	0.540972	7.04897e-07	0.0100976	0.682269	0.672587	0.680867	0.706634
378	taurocholenate sulfate*	1345	TRUE	0.502345	0.14355	-0.0528803	0.0934178	0.0579858	-0.00842039	-0.00513507	4.39302	5.9974	0.00420657	0.0748364	0.458208	0.0972362	0.488522	0.00100257	0.241494	0.037548	0.00178357	0.32709	0.706634
478	behenoyl dihydrosphingomyelin (d18:0/22:0)*	1345	TRUE	-1.27695	0.00254593	0.0504742	-0.00976667	-0.103013	-1.25798e-05	0.0464616	-3.02967	-4.4247	3.09731e-14	0.973692	0.459883	0.856389	0.199007	0.995907	1.93278e-28	0.134369	0.0161398	0.984579	0.707944
707	2-ketocaprylate	1345	TRUE	0.554811	-0.139316	0.0499533	0.190378	-0.118467	0.00539315	-0.0298575	-0.222874	-1.02901	0.000890149	0.0691417	0.461342	0.000381122	0.136848	0.0267586	8.12148e-13	0.911681	0.57311	0.314434	0.707944
375	palmitate (16:0)	1345	TRUE	-0.799035	0.153115	-0.0499044	-0.302799	-0.00570811	0.00559766	0.0218703	-3.57336	-0.534528	1.67024e-06	0.0456001	0.461428	1.55601e-08	0.942813	0.0214017	1.53688e-07	0.0751134	0.769573	0.272549	0.707944
872	carotene diol (2)	1345	TRUE	1.54255	-0.0843331	0.0466609	-0.173684	-0.29805	0.00980627	-0.0658291	-6.43813	3.11766	8.00407e-23	0.241579	0.463922	0.000560499	6.78347e-05	1.81167e-05	2.40979e-63	0.00064854	0.0691934	0.549415	0.709881
777	undecenoylcarnitine (C11:1)	1345	TRUE	-0.535235	0.0219111	-0.0505597	0.457181	-0.0838369	0.0114708	-0.00430649	-1.59907	-2.63301	0.00165192	0.779047	0.464295	5.56483e-17	0.301466	3.76313e-06	0.310825	0.434745	0.157025	0.904379	0.709881
605	pregnenetriol disulfate*	1345	TRUE	0.392946	-0.0174628	0.0466821	0.706091	-0.207206	-0.0232593	0.0173346	-9.956	-3.84411	0.0126328	0.809244	0.465726	2.62853e-44	0.00583156	4.39166e-24	1.06148e-05	1.51834e-07	0.0257123	0.922928	0.709881
450	X - 12844	1345	TRUE	-1.34236	0.00476983	-0.0508072	0.255889	-0.358204	0.0104712	0.0294506	1.6386	-4.19416	5.26798e-15	0.951738	0.466163	3.40461e-06	1.21415e-05	2.87737e-05	6.49496e-12	0.427672	0.0254922	0.980181	0.709881
875	16a-hydroxy DHEA 3-sulfate	1345	TRUE	0.530978	0.201252	-0.0465343	0.454328	-0.137187	-0.0291581	0.0243017	-7.35211	-3.76013	0.000748808	0.00538741	0.467002	2.54023e-19	0.0678513	6.42102e-37	6.56107e-10	0.000105168	0.0290749	0.0955367	0.709881
288	tridecenedioate (C13:1-DC)*	1345	TRUE	-0.778803	0.146674	0.0521826	0.270775	-0.0821708	0.00483945	0.015294	0.815789	-2.26394	1.05841e-05	0.0707801	0.467444	1.8269e-06	0.329878	0.0605346	0.000534523	0.701438	0.241738	0.31659	0.709881
166	eicosenoate (20:1)	1345	TRUE	-0.347644	0.123438	0.0510093	-0.253004	-0.102889	0.0123913	-0.00638282	-2.97434	0.585441	0.0447087	0.120558	0.468353	5.31975e-06	0.212932	9.28423e-07	0.140103	0.153572	0.75728	0.398455	0.710058
855	docosahexaenoylcholine	1345	TRUE	0.204808	-0.132037	0.0489497	-0.0694106	-0.0490953	0.0191574	-0.0386847	0.00951727	1.41327	0.221411	0.0859806	0.47182	0.196642	0.538869	4.40376e-15	2.33409e-20	0.996233	0.440464	0.344833	0.714105
836	3-methoxytyrosine	1345	TRUE	-0.0942911	0.0295614	-0.0490457	-0.127062	-0.0952995	0.0098519	-0.0122213	-2.83166	8.3964	0.575208	0.701966	0.472969	0.0186287	0.235053	5.9458e-05	0.00364111	0.162011	5.06173e-06	0.868732	0.714638
181	1-oleoyl-2-dihomo-linoleoyl-GPC (18:1/20:2)*	1345	TRUE	1.09729	-0.0984304	0.0497435	-0.248469	-0.27634	0.00431504	-0.0409859	0.974379	-3.71903	1.39225e-10	0.209952	0.473883	5.97947e-06	0.000704244	0.0835829	8.41715e-22	0.635898	0.0467802	0.512498	0.714814
736	1-palmitoyl-GPC (16:0)	1345	TRUE	0.536194	0.0725726	0.0462521	0.326846	-0.294466	0.00717907	-0.0356733	7.04606	-2.67934	0.000843808	0.325101	0.478386	2.30294e-10	0.000121425	0.00217993	6.10019e-19	0.000267746	0.127278	0.638795	0.720392
400	myristate (14:0)	1345	TRUE	-0.235744	0.153016	-0.0478542	-0.582607	-0.0378499	0.00444324	0.00733226	2.33708	0.636299	0.15701	0.0454238	0.479398	1.19065e-27	0.633817	0.0674014	0.0780613	0.243727	0.726927	0.272549	0.720706
525	X - 23639	1345	TRUE	-0.0270649	-0.0573376	0.0468531	0.0606806	-0.16377	0.022058	-0.0366921	8.53665	0.341549	0.869135	0.447115	0.482549	0.249766	0.0366085	3.33985e-20	3.83685e-19	1.57535e-05	0.849243	0.736031	0.722003
83	sphingomyelin (d18:2/16:0, d18:1/16:1)*	1345	TRUE	-1.44961	-0.0746233	0.0446454	-0.492595	-0.746434	0.01713	0.0325868	-5.93477	-0.569323	2.30437e-20	0.29982	0.483195	1.23672e-22	1.81541e-23	6.73536e-14	8.68189e-17	0.00165728	0.739869	0.610325	0.722003
137	adenine	1345	TRUE	-1.13739	-0.0562148	0.0511903	-0.00150937	-0.00891535	0.0126365	0.0192426	2.62356	0.928426	2.7132e-10	0.496673	0.48413	0.979171	0.917355	1.50643e-06	1.89886e-05	0.226204	0.637485	0.757556	0.722003
705	arachidonoylcarnitine (C20:4)	1345	TRUE	-0.658625	0.189972	-0.0444612	0.879607	0.0821994	0.0107378	-0.00620993	1.17094	0.859443	2.58143e-05	0.00820958	0.484365	1.24448e-68	0.270931	2.55455e-06	0.112261	0.534241	0.615699	0.114983	0.722003
74	1-myristoyl-2-linoleoyl-GPC (14:0/18:2)*	1345	TRUE	-0.353764	0.00899696	0.0472155	-0.464562	-0.314794	-0.00373783	0.0271507	2.06586	-7.33597	0.0333662	0.906182	0.484469	3.16633e-18	7.21004e-05	0.123199	6.28244e-11	0.301903	5.4915e-05	0.960313	0.722003
160	lithocholate sulfate (1)	1345	TRUE	-0.36167	0.0659378	-0.0498952	-0.0471766	-0.0465469	0.00442773	0.0063209	1.55273	-1.76994	0.0398383	0.41439	0.485096	0.403517	0.579173	0.0844457	0.150423	0.463429	0.357779	0.714026	0.722003
691	sphingomyelin (d17:1/16:0, d18:1/15:0, d16:1/17:0)*	1345	TRUE	-0.99046	-0.0320255	0.0474404	-0.0959826	-0.548318	0.0148474	0.014289	4.37538	1.12056	3.77638e-09	0.678094	0.487051	0.0751566	7.89966e-12	1.37741e-09	0.000664691	0.0305199	0.542129	0.860956	0.723711
775	1-linoleoyl-GPC (18:2)	1345	TRUE	1.31744	-0.182899	0.0426601	0.404447	-0.452509	0.00442142	-0.0573325	3.3333	-2.83408	7.15219e-18	0.00920882	0.492334	1.75381e-16	5.58245e-10	0.0474862	6.9455e-51	0.0702085	0.0903037	0.120337	0.730349
658	X - 22771	1345	TRUE	-0.0588107	0.109555	0.049682	0.409734	0.160136	0.00845511	-0.0171214	2.09025	-2.82899	0.742123	0.181859	0.493749	9.16035e-13	0.0603306	0.00117962	0.000125684	0.331192	0.147884	0.471056	0.73118
131	arabonate/xylonate	1345	TRUE	-0.68897	-0.10393	0.0463921	-0.0709842	0.000630638	0.0270247	-0.0201056	9.81817	2.47245	3.89328e-05	0.176508	0.495255	0.186653	0.993701	1.86597e-28	1.54226e-06	1.11085e-06	0.177132	0.467626	0.73118
183	gentisate	1345	TRUE	0.460111	0.0163738	0.0476883	-0.0559793	0.0457948	0.00547302	-0.0251688	2.52188	5.99545	0.00753926	0.835925	0.495342	0.311112	0.577146	0.0293007	4.88061e-09	0.223648	0.00145683	0.93198	0.73118
347	X - 16964	1345	TRUE	-0.426858	0.147726	0.0482569	0.487673	0.141425	0.00994789	-0.00816852	1.10713	-3.71365	0.0145843	0.0656025	0.496606	3.48425e-18	0.0897728	9.49205e-05	0.0613268	0.598622	0.0520473	0.307082	0.73184
529	palmitoyl sphingomyelin (d18:1/16:0)	1345	TRUE	0.0141511	-0.117126	0.0461841	-0.0547983	-0.832478	0.0190687	-0.027579	-0.91937	2.87899	0.932705	0.12794	0.497454	0.308295	2.13028e-25	6.07843e-15	4.45957e-11	0.648512	0.116277	0.41132	0.731887
725	1-linoleoyl-2-linolenoyl-GPC (18:2/18:3)*	1345	TRUE	0.984171	-0.112463	0.0448904	-0.186515	-0.501332	0.00606939	-0.0393142	1.0558	-2.92401	1.73876e-09	0.134019	0.498983	0.000378057	1.27956e-10	0.0108997	6.11799e-22	0.591511	0.101986	0.41896	0.731922
169	EDTA	1345	TRUE	-0.295362	-0.029006	-0.0459349	0.384402	0.00957905	-0.00489782	0.0140201	-6.67306	-1.70768	0.0778289	0.706033	0.499546	8.63778e-13	0.904562	0.0449509	0.000805577	0.000931841	0.351282	0.871856	0.731922
589	propionylglycine	1345	TRUE	0.576404	-0.19576	0.047174	-0.150432	-0.252303	0.00756007	-0.0286642	10.9834	2.40808	0.000837474	0.0134837	0.500938	0.00660766	0.00217565	0.00266501	2.94478e-11	1.23461e-07	0.20205	0.150809	0.731922
149	3-indoleglyoxylic acid	1345	TRUE	0.106751	-0.0124749	0.0468606	0.515149	0.00419239	0.00291929	-0.0162601	8.5049	1.10796	0.533723	0.874141	0.50121	8.19767e-21	0.959134	0.24322	0.000147827	3.79376e-05	0.554844	0.951677	0.731922
38	1-dihomo-linoleoyl-GPC (20:2)*	1345	TRUE	0.695075	-0.0694132	0.0449751	0.139164	-0.410219	0.00680146	-0.0377995	1.93692	-2.22781	2.59752e-05	0.360254	0.502818	0.00869472	1.94698e-07	0.00476942	5.34701e-20	0.33011	0.217762	0.660014	0.731922
279	adenosine	1345	TRUE	0.057688	0.0314382	0.0479691	-0.0697035	-0.0899856	-0.0053735	0.00784459	-5.17462	-0.125385	0.743653	0.697895	0.503187	0.218279	0.284871	0.0367333	0.075048	0.0147968	0.948189	0.864888	0.731922
45	X - 19141	1345	TRUE	-0.075953	-0.0255544	0.0449336	0.240786	-0.182015	0.00523011	-0.00882698	22.7044	2.71442	0.64624	0.736604	0.503795	5.79735e-06	0.0211095	0.0302173	0.0327299	4.16895e-30	0.133701	0.889591	0.731922
884	X - 11381	1345	TRUE	-1.70104	-0.0974184	-0.0455017	0.534404	0.0824093	0.0106629	0.035361	-3.93309	-2.55193	3.9207e-24	0.206218	0.504537	3.43707e-23	0.303364	1.32654e-05	3.3729e-17	0.0515557	0.16457	0.508693	0.731922
110	glycerophosphorylcholine (GPC)	1345	TRUE	0.137714	-0.063475	-0.0489104	0.148542	-0.204262	0.00748308	-0.0169135	4.52543	3.08302	0.445641	0.443865	0.50483	0.0103716	0.0177064	0.00448621	0.000176947	0.0372984	0.118519	0.736031	0.731922
451	X - 12812	1345	TRUE	-0.0430183	-0.0998631	0.0474835	-0.239119	0.280399	0.00332938	-0.00163034	0.932039	3.28787	0.806817	0.216308	0.506348	2.2852e-05	0.000832884	0.194381	0.710643	0.659781	0.0875131	0.515044	0.732936
383	epiandrosterone sulfate	1345	TRUE	0.990483	0.0371073	-0.0420934	0.773763	0.119961	-0.0157694	-0.0190178	-0.560345	-5.07839	3.33772e-10	0.608218	0.510983	8.80607e-53	0.110679	6.96928e-12	1.37428e-06	0.767763	0.00323222	0.828088	0.738453
78	2-hydroxystearate	1345	TRUE	-0.256497	0.0215112	0.0448853	0.0259698	-0.132714	0.0114854	-0.0128088	-3.23611	3.96238	0.130226	0.782234	0.514436	0.633109	0.100702	3.38116e-06	0.0024861	0.112671	0.0325881	0.904379	0.742246
97	3-hydroxyhippurate	1345	TRUE	-0.234462	-0.0234969	0.0454095	-0.0276093	0.0456924	0.00852656	-0.00541536	-1.47534	-2.3989	0.172828	0.766047	0.51569	0.616977	0.577559	0.000675628	0.207524	0.476022	0.20227	0.8984	0.742353
635	ursodeoxycholate	1345	TRUE	-0.230465	-0.173047	-0.0451496	0.127664	0.185449	-0.006848	0.0188755	-9.7539	-6.9204	0.180079	0.0283584	0.517917	0.020689	0.0237321	0.00630925	1.1073e-05	2.4291e-06	0.000233199	0.22486	0.742353
12	1-myristoyl-GPC (14:0)	1345	TRUE	-0.175512	0.0588446	0.0441078	-0.0610496	-0.0422863	0.000662066	0.00554426	9.64374	-3.81305	0.297311	0.446613	0.519027	0.258684	0.598585	0.787484	0.187522	1.95347e-06	0.0384487	0.736031	0.742353
686	5-methyluridine (ribothymidine)	1345	TRUE	0.313449	-0.0115641	-0.0454388	0.39693	-0.00387153	0.00495887	-0.0234905	2.57049	-0.921809	0.0710042	0.88465	0.519336	1.05279e-12	0.962711	0.0501656	6.08033e-08	0.218619	0.627381	0.955957	0.742353
503	dihomo-linolenoylcarnitine (C20:3n3 or 6)*	1345	TRUE	-0.756437	0.215897	-0.0419729	0.684372	-0.0268047	0.00898806	0.00291883	2.10474	-2.61756	2.55967e-06	0.00345791	0.520532	4.05274e-40	0.72678	0.000127079	0.467525	0.276876	0.136768	0.0774573	0.742353
184	X - 17690	1345	TRUE	0.278034	-0.0815195	0.0446325	0.433345	-0.00336146	-0.00919614	0.000767214	8.29371	1.10066	0.104761	0.300227	0.521438	3.3362e-15	0.967202	0.000234029	0.857785	5.80295e-05	0.557132	0.610325	0.742353
408	X - 23739	1345	TRUE	-0.370206	-0.148655	0.0413169	0.461485	-0.0306728	0.0129328	-0.0129811	3.92322	0.962739	0.0197635	0.0414995	0.521885	1.39509e-19	0.685576	2.36008e-08	0.00106896	0.040136	0.579476	0.264355	0.742353
253	beta-alanine	1345	TRUE	-0.636188	-0.111333	-0.0435566	0.60839	-0.0674022	-0.000571657	0.0163533	-0.230029	-0.680712	0.00014939	0.148347	0.522694	1.33097e-29	0.399626	0.815258	9.53571e-05	0.909297	0.710677	0.436133	0.742353
396	linoleoylcholine*	1345	TRUE	0.143333	-0.163734	0.0436468	-0.0684148	-0.286386	0.0134484	-0.0262995	2.92162	0.554659	0.394632	0.0341773	0.523347	0.20553	0.000362737	4.33438e-08	4.03637e-10	0.149382	0.763295	0.246959	0.742353
25	S-adenosylhomocysteine (SAH)	1345	TRUE	-1.55683	0.0158639	0.0408105	0.614724	0.164263	0.0128018	0.0283256	-1.38292	0.0301172	4.76303e-23	0.826321	0.523434	4.89706e-34	0.028747	2.48252e-08	5.98395e-13	0.465573	0.986049	0.927799	0.742353
534	glycine conjugate of C10H14O2 (1)*	1345	TRUE	-1.24395	-0.186884	0.0434804	0.33257	0.0950682	0.00553814	0.0311281	1.86812	-1.69222	1.25518e-13	0.0153097	0.523639	6.696e-10	0.235071	0.0236749	1.13887e-13	0.355106	0.356697	0.156742	0.742353
377	N-acetylneuraminate	1345	TRUE	-0.98476	0.145116	0.0434529	-0.08935	0.0604983	0.00953894	0.0173258	5.20652	4.33389	5.02867e-09	0.0605984	0.525353	0.0983908	0.451462	0.000103133	3.82883e-05	0.0102215	0.0186616	0.304607	0.742353
701	glutamate	1345	TRUE	-2.34978	0.0254318	0.0356248	0.662114	0.340936	0.00445032	0.063435	-4.88651	-3.8876	1.10203e-64	0.688907	0.526144	2.84958e-50	2.39246e-07	0.0274196	3.11122e-75	0.00334157	0.0102073	0.860956	0.742353
256	imidazole propionate	1345	TRUE	-0.968884	-0.123476	0.0411583	0.467205	0.279937	0.00502007	0.0171209	-4.75715	0.713629	1.3828e-09	0.092685	0.526389	8.96177e-20	0.000243283	0.0313893	1.8275e-05	0.0134654	0.683352	0.359506	0.742353
386	2-piperidinone	1345	TRUE	-0.0609121	-0.121682	0.0416231	0.313177	-0.0133559	-0.0013851	0.00281464	-16.3981	-1.74774	0.706865	0.101779	0.526938	1.69784e-09	0.862749	0.557621	0.486648	4.02783e-17	0.323886	0.372219	0.742353
286	glycine	1345	TRUE	0.837683	-0.071503	0.0416869	-0.467671	-0.21201	0.00964219	-0.0397358	9.41215	0.45202	2.57621e-07	0.33814	0.527887	3.19189e-19	0.00626246	4.77417e-05	1.32759e-22	1.51006e-06	0.799368	0.648765	0.742522
262	alpha-hydroxyisocaproate	1345	TRUE	-0.110315	-0.0375567	0.0373291	0.983484	-0.0128071	-0.0137501	0.014329	-3.2279	0.526837	0.458004	0.582106	0.536389	2.03148e-94	0.856655	2.25403e-10	0.000113878	0.0711797	0.745917	0.814115	0.753298
846	glutarylcarnitine (C5-DC)	1345	TRUE	-0.190342	0.0226523	-0.0399394	0.578889	-0.160016	0.00251654	-0.003162	9.88725	1.02841	0.23467	0.758047	0.539255	2.03904e-29	0.0362101	0.281308	0.429344	2.90882e-07	0.557187	0.893697	0.755738
815	vanillylmandelate (VMA)	1345	TRUE	-1.77689	-0.149853	0.0392452	-0.0497849	-0.030603	0.0398771	-0.00290508	3.35686	0.654085	1.74516e-29	0.0383548	0.539813	0.324991	0.683926	1.95749e-67	0.460558	0.0767552	0.704361	0.254507	0.755738
90	X - 16946	1345	TRUE	0.0501741	0.0319232	0.04135	0.48198	-0.0383676	0.00764236	-0.0222874	-2.4448	-3.4398	0.764035	0.677415	0.54247	2.59822e-19	0.630339	0.00171708	9.40164e-08	0.224235	0.0599069	0.860956	0.757278
551	1,7-dimethylurate	1345	TRUE	-0.717351	-0.0240572	0.0416046	0.00234898	-0.0136154	0.00970174	0.00957922	6.75012	-1.57462	2.00653e-05	0.755443	0.542603	0.965299	0.865263	7.67127e-05	0.0226386	0.000856236	0.39215	0.891801	0.757278
457	2-linoleoyl-GPE (18:2)*	1345	TRUE	0.0523542	-0.0100895	0.042407	0.171572	-0.213752	0.00464594	-0.0122185	1.9021	-3.28871	0.762034	0.898858	0.545926	0.00198892	0.00954364	0.0653894	0.00466873	0.36066	0.0820335	0.959779	0.760731
13	S-allylcysteine	1345	TRUE	0.565159	-0.0793193	0.040663	0.237883	-0.162985	-0.00386862	-0.0155251	-3.27191	-2.8313	0.000779991	0.304398	0.551738	1.05207e-05	0.0422187	0.114795	0.000220136	0.106056	0.123851	0.610408	0.767636
39	3-aminoisobutyrate	1345	TRUE	0.156426	-0.0401628	0.0398768	0.160596	-0.175642	0.012743	-0.0277488	7.23087	-1.20132	0.345491	0.597808	0.553794	0.00254763	0.0263684	1.36706e-07	2.09586e-11	0.000290816	0.507744	0.82279	0.769302
627	X - 21471	1345	TRUE	-0.268703	0.0303922	0.038837	0.117099	0.952723	-0.0124151	0.0242582	-10.3359	1.36149	0.0982107	0.683738	0.556248	0.0247526	1.00211e-34	1.61551e-07	2.28563e-09	1.25675e-07	0.443681	0.860956	0.771515
246	X - 13728	1345	TRUE	-0.386911	-0.176486	-0.0393032	-0.0197543	-0.0846501	0.00598161	0.00728084	13.5896	-1.01664	0.0196386	0.0204486	0.559545	0.710523	0.284535	0.0133846	0.0788149	9.82219e-12	0.575151	0.18507	0.774477
727	oleoyl-oleoyl-glycerol (18:1/18:1) [1]*	1345	TRUE	-1.36689	0.0371972	-0.0407079	0.251125	0.209454	0.0057268	0.0362196	3.2261	-6.44635	1.91422e-15	0.637627	0.560113	5.39314e-06	0.0106814	0.022431	3.47018e-17	0.119137	0.000611821	0.841799	0.774477
479	sphingomyelin (d18:1/22:1, d18:2/22:0, d16:1/24:1)*	1345	TRUE	-0.7939	-0.0322412	-0.039347	-0.359875	-0.699574	0.0176357	0.00605811	0.388475	2.13283	2.0211e-06	0.674288	0.562077	1.93963e-11	1.67004e-18	4.57847e-13	0.146669	0.846821	0.243224	0.860956	0.775995
51	1-stearoyl-2-dihomo-linolenoyl-GPE (18:0/20:3n3 or 6)*	1345	TRUE	-0.957538	0.0563162	0.0384239	-0.241827	0.370439	-0.00201489	0.0396719	1.60873	-4.1416	6.16496e-09	0.456549	0.565821	4.79682e-06	2.42789e-06	0.401677	5.42447e-22	0.417159	0.0215437	0.739545	0.778029
388	X - 15666	1345	TRUE	0.680912	0.0596684	0.0413974	0.0368895	-0.0596856	-0.0035871	-0.0209471	5.85335	1.60671	0.000132525	0.465741	0.567292	0.518864	0.482482	0.167424	2.52066e-06	0.006339	0.409687	0.746519	0.778029
601	1-stearoyl-2-dihomo-linolenoyl-GPI (18:0/20:3n3 or 6)*	1345	TRUE	-0.921878	0.0512044	0.0401404	-0.199908	-0.212748	0.00972367	0.0202787	4.74657	-9.95419	1.01311e-07	0.519494	0.568152	0.000321492	0.00999348	0.000117704	2.75161e-06	0.0227375	1.47222e-07	0.770883	0.778029
593	serotonin	1345	TRUE	0.518738	0.227005	-0.0406763	-0.0884063	-0.0965464	-0.0149612	0.00492243	-2.49673	1.25264	0.00311191	0.00483363	0.568161	0.116445	0.248664	5.00869e-09	0.261408	0.237074	0.513958	0.0921475	0.778029
263	N-oleoyltaurine	1345	TRUE	-0.542615	0.143485	-0.0407042	-0.317287	-0.103244	0.0151079	-0.00292909	1.75265	0.958876	0.00206164	0.0759603	0.569317	1.98223e-08	0.219035	4.04004e-09	0.50552	0.408278	0.618632	0.328794	0.778029
427	N-acetylmethionine	1345	TRUE	-0.755379	0.0560771	-0.039632	-0.221863	-0.239644	0.00909015	0.0154367	5.08668	4.70111	1.05671e-05	0.476283	0.569332	5.54719e-05	0.00338984	0.000277947	0.000313602	0.0137087	0.0121948	0.747779	0.778029
484	X - 24411	1345	TRUE	-0.618959	-0.0553518	-0.0385981	0.199814	0.102489	0.00299103	0.0118635	-6.58418	-1.61633	0.00021264	0.470688	0.569629	0.000195275	0.198566	0.219758	0.00448859	0.00106267	0.376605	0.747779	0.778029
273	carotene diol (3)	1345	TRUE	1.34642	-0.106542	0.0385468	-0.0819929	-0.291097	0.00413943	-0.0513789	-2.67389	4.60719	1.2368e-15	0.167919	0.572802	0.129007	0.000287349	0.0916726	2.37739e-34	0.186772	0.0123189	0.4555	0.780954
696	homostachydrine*	1345	TRUE	-0.165991	0.0111818	0.040183	0.0267036	0.0809461	0.00231521	0.00144854	-3.60639	0.833941	0.34516	0.889838	0.573683	0.636089	0.334478	0.3666	0.741563	0.0883485	0.66458	0.958287	0.780954
139	arachidonoylcholine	1345	TRUE	-0.0385414	-0.100269	0.0386508	-0.0361848	-0.00145545	0.0110395	-0.0180668	5.37767	3.62924	0.820064	0.197434	0.574385	0.505811	0.985632	7.91375e-06	1.96866e-05	0.00836246	0.0502076	0.496912	0.780954
519	1-eicosenoyl-GPC (20:1)*	1345	TRUE	1.17907	-0.0515685	0.0336487	0.143889	-0.322727	0.014239	-0.0668125	4.1061	-0.93554	1.99755e-15	0.44934	0.576856	0.0025313	5.18514e-06	4.82618e-11	1.4975e-72	0.0215656	0.564563	0.736031	0.783126
30	1-myristoyl-2-docosahexaenoyl-GPC (14:0/22:6)*	1345	TRUE	-0.0167377	0.00442167	0.0379131	-0.416909	-0.0591011	0.0142872	-0.0167031	1.73167	-1.07176	0.920631	0.954281	0.578439	1.05277e-14	0.460753	5.47721e-09	6.87772e-05	0.391703	0.559695	0.980911	0.784087
33	X - 21310	1345	TRUE	0.213005	-0.0301746	0.040072	0.0817291	0.271472	-0.00291549	-0.00586791	4.20407	-0.961471	0.231652	0.712085	0.579576	0.152736	0.00139359	0.261604	0.187145	0.0498158	0.621589	0.871856	0.78417
790	pyruvate	1345	TRUE	-0.664482	0.0996788	0.0390979	0.157995	0.225289	0.00324111	0.0181787	-1.04642	-1.57589	0.000134805	0.212289	0.580251	0.00468224	0.00665737	0.201671	2.90458e-05	0.617418	0.407835	0.513606	0.78417
887	X - 12544	1345	TRUE	0.388634	0.0522333	-0.0389756	0.0847774	0.0668472	0.00223601	-0.0190223	3.14615	7.19171	0.0263268	0.515517	0.583363	0.1311	0.423107	0.380831	1.34567e-05	0.13513	0.000171228	0.770111	0.787189
728	sphingomyelin (d18:2/24:2)*	1345	TRUE	-0.346679	-0.0773127	-0.0345677	-0.525262	-0.644292	-0.00136853	0.024653	-4.89286	-0.582391	0.0273315	0.283774	0.588002	2.06617e-25	8.1032e-18	0.550289	3.3424e-10	0.00965865	0.734671	0.590096	0.791939
50	N6-carbamoylthreonyladenosine	1345	TRUE	-1.99292	-0.041764	0.0352489	0.489235	0.080325	0.0189383	0.0317053	8.90933	-0.484161	2.06186e-35	0.570817	0.588651	2.12335e-21	0.293994	5.85733e-16	2.59163e-15	3.96869e-06	0.782679	0.811829	0.791939
585	arginine	1345	TRUE	0.178062	-0.0480979	0.0373517	0.0233854	-0.132662	0.00260202	-0.0115527	-7.48333	-3.02313	0.300392	0.542342	0.592766	0.671741	0.105759	0.29942	0.00715176	0.000298909	0.107962	0.790365	0.796279
827	margaroylcarnitine (C17)*	1345	TRUE	-0.875147	0.112422	0.037127	0.48959	-0.100513	0.0159632	-0.00289129	-1.21558	-2.51704	3.3706e-07	0.153475	0.594149	5.99937e-19	0.219308	1.76329e-10	0.499869	0.556021	0.17979	0.440141	0.796942
228	4-chlorobenzoic acid	1345	TRUE	-0.341908	-0.0897662	0.0402346	0.0728674	0.0509823	0.00886052	-0.0032917	-1.3306	-0.212595	0.0717072	0.303074	0.601824	0.231744	0.573432	0.00137286	0.487621	0.560325	0.918457	0.610325	0.805773
331	X - 12707	1345	TRUE	-0.294664	-0.0245	-0.0345816	0.199476	-0.131966	0.026238	-0.0368174	1.2219	6.8132	0.0714943	0.744127	0.602531	0.000143827	0.0905979	3.6339e-28	1.9698e-19	0.534603	0.000139023	0.89136	0.805773
328	beta-cryptoxanthin	1345	TRUE	1.79413	0.0414923	0.0327039	-0.1309	-0.234963	0.00185585	-0.0629787	-11.6084	1.52776	1.68523e-30	0.563127	0.606449	0.00907039	0.00162352	0.415542	1.56474e-58	6.78349e-10	0.371524	0.807298	0.809061
685	docosapentaenoate (n3 DPA; 22:5n3)	1345	TRUE	-0.796218	0.0843022	-0.0355993	-0.227919	0.100248	0.0165752	0.00166837	-1.78225	0.893547	2.93435e-06	0.280953	0.606796	3.04806e-05	0.217163	2.49226e-11	0.694929	0.384543	0.631451	0.589692	0.809061
241	adrenate (22:4n6)	1345	TRUE	-0.854095	0.157278	-0.0353127	-0.214122	0.0929253	0.00263385	0.0262663	0.707372	1.61239	5.3048e-07	0.0442842	0.609714	8.95795e-05	0.252664	0.288945	6.66086e-10	0.730015	0.386744	0.271772	0.811744
782	2-myristoyl-GPC (14:0)*	1345	TRUE	-0.233242	0.0431785	0.0349628	-0.0473713	-0.0231196	0.00284264	0.00388315	10.4171	-2.97843	0.169061	0.579234	0.611782	0.38417	0.775041	0.250444	0.35938	3.33629e-07	0.108383	0.813233	0.813289
71	carnitine	1345	TRUE	-1.16063	-0.18167	0.0341177	0.595043	0.0880016	0.0100802	0.0164133	-6.91552	-2.52715	3.82102e-12	0.01792	0.615293	1.37609e-28	0.269691	3.5465e-05	8.46252e-05	0.000586735	0.1669	0.170812	0.815189
282	cyclo(pro-val)	1345	TRUE	-0.682172	-0.233806	0.0342994	0.23087	0.0014456	0.0031918	0.0183214	5.57013	-2.29491	5.21702e-05	0.00252682	0.616504	1.98996e-05	0.98566	0.194295	1.36323e-05	0.00605506	0.213396	0.064775	0.815189
414	1-stearoyl-2-docosapentaenoyl-GPE (18:0/22:5n6)*	1345	TRUE	-0.857666	0.0783275	0.0333933	-0.302156	0.29101	-0.00876677	0.0469544	-1.8524	1.89644	2.23202e-07	0.302937	0.619583	1.31053e-08	0.000229586	0.00028355	7.41023e-30	0.352686	0.295137	0.610325	0.815189
213	C-glycosyltryptophan	1345	TRUE	-2.31172	-0.0430973	0.03453	-0.0909898	-0.0924311	0.025826	0.0377487	6.1291	-0.118709	4.10588e-41	0.585561	0.62142	0.0995936	0.260304	8.06084e-25	1.66165e-18	0.00309352	0.949732	0.815256	0.815189
67	glycocholate	1345	TRUE	-0.47124	0.116649	-0.0350049	0.0941291	0.0425741	-0.00190507	0.0189058	-7.3201	-2.23848	0.00696008	0.145663	0.621618	0.0930396	0.609235	0.454395	1.4623e-05	0.000495406	0.241195	0.433672	0.815189
60	stearoyl sphingomyelin (d18:1/18:0)	1345	TRUE	-1.24846	-0.022542	-0.033857	-0.043532	-0.24351	0.00702077	0.0343206	-4.77086	1.81294	1.44498e-13	0.771275	0.621622	0.421927	0.00250459	0.00436566	4.1215e-16	0.0189187	0.326408	0.89982	0.815189
501	N-methylproline	1345	TRUE	-0.234701	-0.0277526	0.0349057	0.113257	0.027908	0.0114991	-0.0115098	-5.86202	1.34823	0.17773	0.728503	0.621658	0.0427242	0.736878	5.95575e-06	0.00814716	0.00515768	0.479058	0.886873	0.815189
132	2-arachidonoyl-GPC (20:4)*	1345	TRUE	0.0901512	-0.011531	-0.033979	0.32792	0.20657	0.00416309	-0.0175752	8.2016	8.21931	0.595086	0.882292	0.621878	1.7082e-09	0.010675	0.0923892	3.35669e-05	5.88126e-05	9.42204e-06	0.955905	0.815189
339	X - 17335	1345	TRUE	-0.435592	0.0361513	-0.0351283	0.0842012	-0.270796	0.012455	-0.0049273	-4.41395	2.27262	0.0131997	0.654156	0.62267	0.135531	0.00123742	1.17903e-06	0.261753	0.0369184	0.237157	0.85429	0.815189
537	1-(1-enyl-stearoyl)-GPE (P-18:0)*	1345	TRUE	0.260115	-0.0964847	0.0332816	0.205647	-0.162453	0.000994237	-0.0155318	-4.10644	0.697924	0.119854	0.208894	0.624157	0.000127444	0.0416948	0.683524	0.000200884	0.041325	0.702804	0.512431	0.815189
123	palmitoleoyl-linoleoyl-glycerol (16:1/18:2) [1]*	1345	TRUE	-1.31474	0.0367333	-0.032786	0.0191504	0.206367	-0.00308353	0.0526284	0.925647	-7.7478	1.52919e-15	0.627474	0.624414	0.717418	0.00868441	0.199676	2.15324e-37	0.640853	1.73614e-05	0.837978	0.815189
108	sphingomyelin (d18:2/23:1)*	1345	TRUE	-1.15287	-0.00942125	0.0320621	-0.534488	-0.463467	0.0133345	0.0277774	-0.248735	-0.166971	8.66391e-13	0.898729	0.624435	5.24452e-25	1.67739e-09	1.42079e-08	5.32841e-12	0.898007	0.924573	0.959779	0.815189
749	sphingomyelin (d18:1/20:0, d16:1/22:0)*	1345	TRUE	-1.0239	-0.0114898	0.0342749	-0.0719954	-0.395935	0.0140798	0.0150131	0.643847	0.413531	3.02997e-09	0.88476	0.625039	0.193895	1.5286e-06	2.25154e-08	0.000500048	0.75669	0.826683	0.955957	0.815189
22	X - 12847	1345	TRUE	-0.0662384	-0.0633924	0.0339304	0.383741	0.0170514	-0.00458869	0.00503737	3.51036	3.57224	0.701049	0.423572	0.62827	4.22069e-12	0.835861	0.0682082	0.242506	0.0909365	0.0583814	0.723754	0.817179
729	glycolithocholate sulfate*	1345	TRUE	0.495294	0.131773	-0.034062	-0.0607059	-0.0398187	0.000301379	-0.0172099	10.6331	2.66048	0.00425584	0.0976303	0.628389	0.275003	0.62995	0.905062	7.00362e-05	3.41454e-07	0.160386	0.361382	0.817179
563	xanthine	1345	TRUE	-1.75978	0.138826	0.0319116	0.38673	0.0947636	0.00628521	0.0469609	-7.33851	-3.19554	6.76401e-27	0.0650361	0.631657	1.94881e-13	0.225415	0.00854536	1.84789e-30	0.000198771	0.0746495	0.307082	0.820239
447	X - 21448	1345	TRUE	0.0500755	0.0646242	0.0323665	0.48457	-0.0514902	0.00579447	-0.0192506	-2.05067	-3.63006	0.764668	0.400096	0.633808	1.7871e-19	0.518712	0.0175367	4.08695e-06	0.308393	0.0472603	0.701538	0.820878
880	X - 21410	1345	TRUE	0.440278	0.153205	0.0304143	0.534584	0.0527097	-0.0228571	0.0146874	-2.83106	-3.05181	0.0051177	0.0338565	0.633982	3.28626e-26	0.482269	2.15122e-23	0.000185072	0.134725	0.0760509	0.246629	0.820878
637	1-arachidoyl-GPC (20:0)	1345	TRUE	1.32071	-0.0558371	0.0284119	0.132892	-0.45032	0.0114076	-0.0664403	5.25954	0.870263	4.40206e-19	0.41109	0.636372	0.00513449	1.76016e-10	1.2446e-07	2.98335e-72	0.00314034	0.590755	0.712788	0.822452
49	X - 12026	1345	TRUE	-2.22535	0.0350894	-0.0310014	0.0228942	-0.0385854	0.0225268	0.0401356	7.63687	2.43182	9.7873e-43	0.637926	0.638371	0.660497	0.618407	1.88254e-21	4.45249e-23	9.33663e-05	0.171009	0.841799	0.822452
592	valine	1345	TRUE	-1.39923	-0.0199364	-0.0318655	0.755527	0.0558702	0.00335023	0.0338354	-4.0876	-2.49203	6.08677e-17	0.795214	0.639118	5.77636e-45	0.48385	0.169715	5.6767e-16	0.0423485	0.173267	0.913476	0.822452
848	tartronate (hydroxymalonate)	1345	TRUE	1.05491	-0.0366051	-0.0308252	-0.212067	-0.223926	0.00755155	-0.0451854	2.00445	-0.654775	7.67604e-11	0.622879	0.639704	4.59115e-05	0.00378313	0.00140354	6.60248e-29	0.304281	0.711953	0.837586	0.822452
248	1-arachidonoyl-GPI (20:4)*	1345	TRUE	-1.00981	-0.173841	0.0333477	0.0884899	0.0426383	0.0137667	0.0111021	-4.49595	2.00008	8.7507e-09	0.0309862	0.639948	0.116223	0.610543	7.52071e-08	0.0113376	0.0333078	0.297508	0.235285	0.822452
419	pipecolate	1345	TRUE	0.758941	0.0901858	0.032793	0.0841922	-0.0301683	-0.00450688	-0.0199073	5.37289	3.29113	1.15778e-05	0.256362	0.640843	0.129582	0.714764	0.074147	4.12767e-06	0.0098914	0.0821044	0.562832	0.822452
666	1-stearoyl-2-docosahexaenoyl-GPE (18:0/22:6)*	1345	TRUE	-0.906641	0.036436	0.0324156	-0.280409	0.513852	0.012005	0.0134873	-6.81857	-1.7945	1.24015e-07	0.643493	0.641622	3.48361e-07	3.32746e-10	1.58062e-06	0.0016396	0.000952863	0.338677	0.847802	0.822452
453	palmitoleate (16:1n7)	1345	TRUE	-0.42545	0.130003	0.0297966	-0.765999	-0.00699024	0.00566614	0.0146088	3.03465	-2.28773	0.00732211	0.0742836	0.643779	3.77312e-51	0.926397	0.014322	0.000227464	0.111968	0.187374	0.32709	0.824037
554	betaine	1345	TRUE	-0.489167	-0.0560621	0.0301821	0.648339	0.103089	0.0150056	-0.0187434	-8.95903	-0.43684	0.00242918	0.449135	0.645094	5.74127e-36	0.180369	1.79817e-10	3.30647e-06	3.94922e-06	0.804487	0.736031	0.824542
357	X - 24699	1345	TRUE	-1.25631	-0.134309	0.0279345	0.936881	-0.102536	0.0240508	-0.00764146	4.91523	4.00257	8.03472e-17	0.0524029	0.648351	1.79871e-83	0.154021	7.77832e-28	0.0425143	0.00676581	0.0152454	0.289833	0.827525
299	3-bromo-5-chloro-2,6-dihydroxybenzoic acid*	1345	TRUE	-1.03213	0.00869182	-0.0310714	0.288539	0.123418	-0.00330968	0.0335682	-0.143504	-3.73316	1.00091e-09	0.910779	0.650694	1.03042e-07	0.125637	0.179173	1.80571e-15	0.943734	0.0433662	0.961199	0.828553
804	1-ribosyl-imidazoleacetate*	1345	TRUE	-1.21372	-0.0957676	-0.0295414	0.577968	0.00836422	0.0183067	0.00466762	10.1415	2.31211	4.38834e-14	0.194511	0.651006	4.06482e-29	0.91315	5.83369e-15	0.245169	1.59693e-07	0.188604	0.494923	0.828553
795	taurolithocholate 3-sulfate	1345	TRUE	0.848875	0.195915	-0.0309028	-0.0282639	0.0706528	-0.00206872	-0.026789	10.809	4.13857	5.92231e-07	0.0120641	0.654458	0.604425	0.383549	0.404009	2.81348e-10	1.26815e-07	0.0260272	0.142229	0.831765
236	gamma-glutamyltryptophan	1345	TRUE	-1.266	-0.0375871	0.0309865	0.351746	-0.0200641	0.00935259	0.0246332	3.65159	-3.59991	1.5974e-13	0.633252	0.656577	1.68541e-10	0.806325	0.000185635	9.05982e-09	0.0769964	0.0550831	0.841799	0.833276
608	sulfate of piperine metabolite C16H19NO3 (3)*	1345	TRUE	-0.20577	-0.109436	0.0310314	0.318538	-0.0498574	-0.00132958	0.0074282	-1.8769	-3.39742	0.234835	0.168779	0.65915	1.00462e-08	0.546194	0.59864	0.0860155	0.367925	0.0729343	0.4555	0.83489
473	9,10-DiHOME	1345	TRUE	1.12178	-0.0188834	-0.031739	-0.138652	0.00115349	-0.00272105	-0.0337145	-2.49966	-0.355182	2.59926e-10	0.816729	0.659712	0.0149237	0.989128	0.293097	2.84967e-14	0.241873	0.85482	0.925145	0.83489
136	10-heptadecenoate (17:1n7)	1345	TRUE	-0.84901	0.150484	-0.029479	-0.513573	0.0317278	0.00772031	0.0225519	-0.486685	-2.00411	3.04337e-07	0.0480553	0.66157	4.86194e-22	0.688277	0.0014084	5.17761e-08	0.807308	0.269121	0.274999	0.83606
399	N-formylphenylalanine	1345	TRUE	-0.00805448	0.086491	0.0317937	-0.0640421	-0.12512	-0.001989	0.00376644	-2.77169	-2.91913	0.964339	0.295705	0.663924	0.268034	0.145373	0.449014	0.402625	0.201124	0.138501	0.607224	0.837067
706	5-dodecenoylcarnitine (C12:1)	1345	TRUE	-0.349262	0.0786848	-0.030251	-0.261255	-0.0544027	0.00207405	0.0122532	-1.7298	0.152565	0.0417937	0.317874	0.664235	2.09418e-06	0.506218	0.407178	0.00425234	0.402215	0.93521	0.627346	0.837067
584	1-arachidonoyl-GPC (20:4n6)*	1345	TRUE	0.347507	-0.0734329	0.0299238	0.348766	0.128483	0.00087433	-0.020581	7.65141	6.64833	0.0412938	0.34764	0.6653	1.76131e-10	0.113714	0.724806	1.31224e-06	0.000189113	0.000358248	0.653182	0.837231
219	cysteine s-sulfate	1345	TRUE	-0.291161	0.242883	-0.0302361	0.256444	0.0764864	0.0177889	-0.0196252	10.5335	-0.219212	0.0916149	0.00217656	0.666249	3.66911e-06	0.352855	1.58053e-12	5.3188e-06	3.95942e-07	0.907562	0.0629097	0.83725
611	dihomo-linoleoylcarnitine (C20:2)*	1345	TRUE	-0.441447	0.126445	0.0275838	0.595717	-0.230688	0.017103	-0.019692	-5.83804	-5.10304	0.00573447	0.0848	0.670842	3.44152e-31	0.00247307	2.14994e-13	8.08827e-07	0.00240028	0.00350489	0.343805	0.841841
119	isoleucylglycine	1345	TRUE	0.0413964	-0.115065	0.0299608	0.0266188	-0.0477213	0.0149708	-0.025273	1.81523	-1.02414	0.812535	0.151067	0.672596	0.634689	0.566531	4.07718e-09	6.78816e-09	0.387547	0.591682	0.438046	0.842862
594	dodecanedioate (C12-DC)	1345	TRUE	-0.0696824	0.125304	0.0290559	-0.211279	-0.0468116	0.0109699	-0.0149447	6.19183	-2.32143	0.682425	0.109043	0.674457	0.00011097	0.564443	1.00205e-05	0.000443399	0.00252066	0.212702	0.387696	0.844013
633	phenylpyruvate	1345	TRUE	0.106805	0.0639799	0.0284423	0.556864	0.182199	-0.00989139	0.00451749	0.109605	-2.22794	0.525083	0.406994	0.676916	5.48758e-25	0.023031	5.44055e-05	0.281892	0.956784	0.225513	0.709287	0.845047
888	andro steroid monosulfate C19H28O6S (1)*	1345	TRUE	0.628748	0.144594	-0.0266018	0.555828	-0.0984358	-0.0275799	0.0166915	-4.38838	-2.9172	6.46037e-05	0.0453683	0.677282	3.63281e-28	0.189734	2.88667e-33	2.1768e-05	0.0205039	0.0901288	0.272549	0.845047
4	13-HODE + 9-HODE	1345	TRUE	0.653665	0.0738516	-0.0287198	-0.369905	-0.0789318	2.43737e-05	-0.0183852	2.40659	0.27525	0.000135281	0.347632	0.679714	1.70441e-11	0.333937	0.992214	1.72888e-05	0.242991	0.883188	0.653182	0.845047
614	N-acetylthreonine	1345	TRUE	-1.10393	-0.0163369	0.0275087	0.614297	-0.0388675	0.0122549	0.0114763	3.96008	3.07515	1.7557e-11	0.82839	0.679912	2.04722e-31	0.61961	3.06943e-07	0.00513066	0.0450187	0.0867724	0.927947	0.845047
819	X - 13431	1345	TRUE	-0.266909	0.033457	-0.0290883	0.454415	-0.0280628	0.00915952	-0.0117959	9.45022	0.18016	0.124969	0.675305	0.680588	4.00439e-16	0.735221	0.000305889	0.00664059	6.37503e-06	0.924571	0.860956	0.845047
336	p-cresol sulfate	1345	TRUE	0.136099	0.0653778	-0.02825	-0.100227	0.0951104	0.0126867	-0.0260929	12.6198	0.942422	0.42208	0.400929	0.681609	0.0654676	0.239512	2.87482e-07	7.20672e-10	6.19997e-10	0.611291	0.701625	0.845047
499	1-adrenoyl-GPC (22:4)*	1345	TRUE	-0.1502	0.0274822	0.0290386	0.177734	-0.214188	-0.00880281	0.0161491	6.55829	6.23863	0.389159	0.731461	0.681885	0.00149886	0.0100383	0.00053885	0.000210195	0.00178285	0.00107543	0.887082	0.845047
507	myristoleate (14:1n5)	1345	TRUE	0.0408339	0.123276	0.0264328	-0.863558	-0.0708257	-0.000122067	0.00953497	3.40692	-1.29796	0.799686	0.0952068	0.68591	9.36268e-63	0.356146	0.958517	0.0176927	0.0785561	0.460875	0.361382	0.848861
43	caffeine	1345	TRUE	-0.440386	0.0364008	-0.0284005	-0.074595	0.0217371	0.00386958	0.0109383	1.30765	-2.3546	0.0113346	0.648479	0.687646	0.181423	0.793293	0.127089	0.0118091	0.53214	0.215801	0.850713	0.849836
776	sarcosine	1345	TRUE	-0.25704	-0.237991	0.028366	0.204174	0.073716	-0.000860063	0.00408569	-9.29546	-1.32448	0.146441	0.00340491	0.693165	0.000325536	0.382582	0.738989	0.355456	1.27929e-05	0.4939	0.0774573	0.853554
671	X - 21383	1345	TRUE	-0.793975	-0.0500918	0.0272555	0.164978	0.0250859	-0.00504127	0.0297951	3.99131	-2.56922	3.06563e-06	0.521378	0.6933	0.00251914	0.757246	0.0421906	2.38248e-12	0.0512844	0.16744	0.770883	0.853554
380	branched-chain fatty acid 18:0 (2)**	1345	TRUE	0.258701	-0.0758943	-0.0291181	0.274879	0.032061	-0.005062	-0.00303091	0.237784	-1.15256	0.156608	0.365387	0.694653	2.73693e-06	0.712832	0.0573509	0.506447	0.913849	0.563952	0.661387	0.853554
199	lactate	1345	TRUE	-0.653839	0.0551198	0.0281584	0.329209	0.217989	0.00491703	0.0126533	-3.97792	-3.04656	0.000221599	0.497713	0.695376	6.89401e-09	0.00984243	0.0568637	0.00422316	0.0619206	0.115678	0.757556	0.853554
500	1-palmityl-2-palmitoyl-GPC (O-16:0/16:0)*	1345	TRUE	1.37373	0.0310508	0.0266907	-0.0145523	-0.56335	-0.0125297	-0.0253751	6.35388	1.54995	2.7318e-16	0.686993	0.695418	0.787055	1.96811e-12	3.07388e-07	1.42938e-09	0.00165838	0.398529	0.860956	0.853554
133	palmitoyl-oleoyl-glycerol (16:0/18:1) [2]*	1345	TRUE	-1.60175	0.114495	0.0264547	0.332304	0.204683	0.000663747	0.0504653	0.99299	-5.18206	9.46121e-22	0.13572	0.696791	5.86029e-10	0.0102511	0.785402	1.25118e-33	0.621585	0.00459241	0.420779	0.854069
826	myristoleoylcarnitine (C14:1)*	1345	TRUE	-0.265216	0.0977585	-0.0273785	0.08477	-0.109552	0.0145392	-0.0152039	-4.23409	-0.303025	0.126738	0.2202	0.697928	0.128317	0.186018	9.44614e-09	0.000457507	0.0427979	0.873264	0.515141	0.854295
18	oleoyl-oleoyl-glycerol (18:1/18:1) [2]*	1345	TRUE	-1.34829	0.0546939	0.0271028	0.222216	0.198795	0.00484242	0.0372578	0.885975	-6.11184	6.22718e-15	0.490764	0.699505	6.20223e-05	0.0159151	0.0547659	6.26506e-18	0.670232	0.00122842	0.756841	0.855057
596	1-stearyl-2-arachidonoyl-GPC (O-18:0/20:4)*	1345	TRUE	0.448263	0.166823	-0.0264757	0.206156	-0.161028	-0.0141646	0.00416056	3.46872	4.89941	0.00979848	0.0362954	0.707228	0.000214743	0.0517514	2.18909e-08	0.337221	0.0967809	0.00985496	0.247779	0.860894
719	palmitoyl-oleoyl-glycerol (16:0/18:1) [1]*	1345	TRUE	-1.51601	0.12864	0.0255722	0.346763	0.214423	0.000864492	0.0469173	2.4415	-5.20724	2.98948e-19	0.0973888	0.709535	1.63733e-10	0.00782364	0.72581	1.09951e-28	0.230067	0.00485493	0.361382	0.860894
799	X - 21467	1345	TRUE	-1.01437	0.0173292	0.0257908	-0.0389351	0.757877	-0.000809272	0.0337638	-4.21074	-0.835637	2.73396e-09	0.824877	0.709703	0.476967	1.21992e-20	0.744936	2.30068e-15	0.0402554	0.654241	0.92734	0.860894
532	cortolone glucuronide (1)	1345	TRUE	-2.62053	-0.0197032	0.0230556	0.336492	0.0106093	0.00977677	0.0724281	-5.67555	-2.7132	2.20244e-65	0.77974	0.711455	8.36914e-12	0.884754	1.24993e-05	1.26923e-79	0.00211857	0.105999	0.904379	0.860894
512	3-methyl-2-oxovalerate	1345	TRUE	-0.343161	0.10596	0.0234723	0.904565	0.191348	-0.0121914	0.0190358	-1.68028	-4.72862	0.0284999	0.14073	0.712234	2.37189e-72	0.0104509	9.51202e-08	1.15084e-06	0.372862	0.00579206	0.43006	0.860894
662	thymol sulfate	1345	TRUE	0.0457858	-0.169829	0.0253796	0.446991	-0.0111127	-0.00136982	-0.0026347	3.03045	6.31069	0.787311	0.0292791	0.712719	2.27184e-16	0.890803	0.579923	0.534261	0.137866	0.000674405	0.228703	0.860894
127	pro-hydroxy-pro	1345	TRUE	-0.0606953	-0.260799	0.0259617	0.14762	-0.0247401	0.00743271	-0.0105957	6.44274	0.329138	0.727497	0.00110962	0.71365	0.00827696	0.765874	0.00343345	0.0148853	0.00211683	0.862845	0.0390896	0.860894
29	3-hydroxypyridine sulfate	1345	TRUE	-0.298688	-0.0755562	0.025127	0.294492	-0.00933413	0.0204982	-0.027572	11.2569	0.0532382	0.0766976	0.329411	0.713894	5.39189e-08	0.907671	8.08038e-17	6.09488e-11	2.96951e-08	0.976988	0.641097	0.860894
371	5alpha-androstan-3beta,17beta-diol monosulfate (2)	1345	TRUE	0.28228	-0.00505191	0.0229771	0.91358	0.233915	-0.0139194	0.00048249	-2.08044	-5.31301	0.068464	0.943382	0.71502	2.20017e-75	0.0015495	7.25671e-10	0.900788	0.264543	0.00171798	0.979188	0.860894
270	oleoyl ethanolamide	1345	TRUE	-0.557091	0.222347	0.0246834	-0.196776	-0.292692	0.0169908	-0.00499837	2.21409	2.24873	0.000836355	0.00368542	0.715561	0.000236644	0.000233698	2.82794e-12	0.230213	0.269976	0.217668	0.0805399	0.860894
778	X - 23780	1345	TRUE	0.258583	-0.0876596	0.0250045	0.219865	-0.203733	-0.00154858	-0.00951601	4.01639	-1.62582	0.126618	0.259361	0.716103	5.19174e-05	0.0116276	0.530467	0.0244233	0.0486734	0.379905	0.562832	0.860894
761	dihomo-linolenoyl-choline	1345	TRUE	-0.506081	-0.101009	0.025492	-0.0716681	-0.155451	0.0114931	-0.00059516	7.28268	0.838936	0.00338149	0.202644	0.716265	0.195969	0.059117	5.02347e-06	0.890262	0.000457908	0.656925	0.504358	0.860894
752	ceramide (d18:1/17:0, d17:1/18:0)*	1345	TRUE	-1.75324	0.0350258	0.0254116	0.120999	-0.0390595	0.013272	0.0371554	-2.28043	-2.10312	2.80573e-24	0.658229	0.716771	0.0288131	0.634906	1.31311e-07	6.42677e-18	0.271897	0.264889	0.85429	0.860894
678	deoxycholic acid (12 or 24)-sulfate*	1345	TRUE	-0.115032	-0.0306281	0.0260451	0.0304748	0.146745	-0.00652733	0.0140489	-3.14571	-1.99286	0.521045	0.709775	0.720547	0.596316	0.086105	0.0125272	0.001704	0.1448	0.309433	0.871856	0.86427
886	phenylalanine	1345	TRUE	-1.43708	0.0516626	0.0235731	0.56774	0.0496938	0.00624443	0.0330171	-3.26565	-3.67914	1.20888e-18	0.490112	0.721876	2.01531e-27	0.52284	0.00863683	5.21518e-16	0.0960772	0.0391178	0.756841	0.864707
851	1-docosapentaenoyl-GPC (22:5n3)*	1345	TRUE	-0.301234	-0.0583285	0.0242296	0.354865	-0.0855505	0.0161679	-0.0225468	4.90878	3.1859	0.0749012	0.452562	0.72431	6.26546e-11	0.288935	5.56885e-11	9.47034e-08	0.0158853	0.0850471	0.737359	0.866464
338	stearoylcholine*	1345	TRUE	-0.131262	-0.189837	0.0240779	-0.0241528	-0.133747	0.0148222	-0.0199171	3.82639	1.66152	0.441432	0.015317	0.728109	0.658984	0.100095	2.51704e-09	2.92842e-06	0.0622535	0.373029	0.156742	0.869847
680	N-acetylglucosamine/N-acetylgalactosamine	1345	TRUE	-1.80996	0.0396347	0.0219354	-0.075915	0.195623	0.00755559	0.0504374	2.26789	0.645046	3.96293e-31	0.579973	0.729179	0.129433	0.00855789	0.000895794	2.53976e-38	0.227032	0.705386	0.813233	0.869966
754	1-dihomo-linolenoyl-GPC (20:3n3 or 6)*	1345	TRUE	-0.49247	-0.0176268	-0.0242055	0.181731	-0.176592	0.00258488	0.0104946	12.9762	-0.00231277	0.0043965	0.824281	0.730346	0.00105754	0.0322568	0.305314	0.0151088	4.49734e-10	0.999024	0.92734	0.8702
1	4-guanidinobutanoate	1345	TRUE	-0.0631569	0.030882	0.0210211	0.763165	0.0376556	0.00472864	-0.0159966	7.60939	2.07497	0.677635	0.657971	0.733375	3.30124e-55	0.603337	0.032832	2.49945e-05	3.16216e-05	0.211817	0.85429	0.872648
41	1-linolenoyl-GPC (18:3)*	1345	TRUE	0.518275	-0.122069	0.0231417	0.148677	-0.154281	0.00406622	-0.026694	9.67373	-0.0669426	0.00205359	0.113822	0.734721	0.0058687	0.0543947	0.0972671	2.07926e-10	1.74952e-06	0.970965	0.393862	0.87309
718	X - 24328	1345	TRUE	0.877851	0.0898188	0.0200333	0.812309	-0.215576	-0.0242379	-0.0010825	3.10723	-1.67743	6.49091e-09	0.195893	0.744367	7.63334e-63	0.00280868	4.38234e-28	0.774504	0.087851	0.310652	0.494923	0.882458
135	X - 13553	1345	TRUE	-1.62479	-0.0839887	0.0215681	0.262799	0.0309398	0.0359132	-0.00664931	-6.93846	5.53804	3.04503e-23	0.263509	0.745509	5.59302e-07	0.691754	3.35242e-51	0.10374	0.000425393	0.00197026	0.568926	0.882458
239	1-oleoyl-2-docosahexaenoyl-GPC (18:1/22:6)*	1345	TRUE	1.10977	0.0426114	-0.0203394	-0.315019	0.0675559	0.0183224	-0.0652043	-0.744008	0.539551	1.12934e-12	0.551894	0.748217	3.14259e-10	0.363946	8.04934e-16	7.67446e-63	0.691907	0.751854	0.800157	0.882458
7	X - 24243	1345	TRUE	-0.133016	-0.0611958	-0.0227317	0.3055	0.00167721	0.000533993	0.000105237	-4.52978	-4.86265	0.445893	0.444962	0.748418	4.90261e-08	0.983923	0.833795	0.980739	0.031012	0.010845	0.736031	0.882458
625	2-hydroxyhippurate (salicylurate)	1345	TRUE	-0.483683	-0.0745269	0.022888	0.134592	0.471072	0.0124796	-0.00707559	2.33893	2.61026	0.00600852	0.356529	0.748915	0.0172234	2.02816e-08	1.17092e-06	0.107651	0.269659	0.17527	0.658409	0.882458
833	1-methyl-4-imidazoleacetate	1345	TRUE	-1.81517	-0.128837	0.0212572	0.263808	0.0356811	0.0294	0.0103134	9.30002	-2.25645	1.55894e-28	0.0867137	0.749364	5.23457e-07	0.647926	8.38417e-35	0.0117261	2.39251e-06	0.207925	0.344833	0.882458
844	1-palmitoylglycerol (16:0)	1345	TRUE	-0.336235	-0.0945656	0.0239366	-0.0220507	-0.00662576	-0.00521651	0.0200336	-9.29415	-1.30114	0.0686702	0.264745	0.749655	0.70989	0.940044	0.0527713	1.40939e-05	2.89709e-05	0.519517	0.570219	0.882458
737	1-stearoyl-2-arachidonoyl-GPC (18:0/20:4)	1345	TRUE	-0.74497	0.0186386	0.0224953	-0.108661	0.279453	0.00420412	0.0194558	4.0291	7.20321	1.90006e-05	0.815737	0.750548	0.0519678	0.00077081	0.0979692	7.79323e-06	0.0546443	0.00015671	0.925145	0.882458
739	sphingomyelin (d18:1/17:0, d17:1/18:0, d19:1/16:0)	1345	TRUE	-0.890468	-0.0144159	-0.0218104	-0.0152111	-0.338211	0.0153051	0.00838678	-2.69726	2.25014	1.69912e-07	0.8537	0.752492	0.780757	3.12464e-05	7.12144e-10	0.0486415	0.188115	0.226999	0.936249	0.882458
842	hydroxy-CMPF*	1345	TRUE	0.428973	-0.0965475	-0.0205927	0.110861	0.0609886	0.0206142	-0.0502829	-2.55078	-1.27581	0.0076256	0.19088	0.752495	0.0316778	0.426435	1.46831e-18	5.78293e-36	0.187408	0.46815	0.49146	0.882458
394	trigonelline (N'-methylnicotinate)	1345	TRUE	0.28016	-0.104116	-0.0211868	-0.0448622	-0.0594117	0.0154704	-0.0346144	10.2808	0.665566	0.0915904	0.172075	0.753438	0.39995	0.453222	1.68145e-10	7.16929e-17	2.68986e-07	0.714056	0.460236	0.882458
321	2-hydroxypalmitate	1345	TRUE	-0.126285	0.0633946	0.0208281	-0.0373147	-0.214448	0.0146442	-0.0215794	-0.665567	2.99394	0.44889	0.407682	0.758467	0.485701	0.00701832	1.72907e-09	2.21746e-07	0.74018	0.100728	0.709287	0.887189
146	7-methylguanine	1345	TRUE	-0.91421	-0.0718461	0.0208565	0.378393	-0.070245	0.00834155	0.0146212	-0.349235	-1.66288	6.56615e-08	0.355085	0.761544	3.23208e-12	0.384133	0.000724344	0.000542216	0.863843	0.368964	0.657427	0.889627
712	theophylline	1345	TRUE	-0.210289	0.0150179	0.0208193	-0.0950463	-0.0285548	0.00361296	0.00338585	6.13918	-1.63007	0.216432	0.847532	0.763194	0.0817393	0.724923	0.145334	0.425621	0.0027144	0.381046	0.933849	0.890393
456	oxalate (ethanedioate)	1345	TRUE	1.11109	0.116193	0.0191288	-0.318034	-0.154021	0.0104255	-0.0501875	7.77097	-0.524858	1.97073e-12	0.108994	0.765509	3.48759e-10	0.0408588	5.97341e-06	4.37425e-37	4.32994e-05	0.761216	0.387696	0.891932
3	orotate	1345	TRUE	-0.655337	0.0320133	0.0204826	0.266658	-0.180808	0.0108204	0.00334962	1.08967	-4.93705	0.000128135	0.683636	0.768207	1.19993e-06	0.0267336	1.44944e-05	0.433232	0.596704	0.00834198	0.860956	0.89331
301	methylsuccinate	1345	TRUE	-0.767426	0.128008	0.0199642	-0.0322869	-0.0159598	0.0183061	-0.00330235	5.21826	0.063907	4.39456e-06	0.0952722	0.768685	0.547237	0.841323	5.88609e-14	0.428949	0.0094791	0.972113	0.361382	0.89331
425	1-stearoyl-2-oleoyl-GPS (18:0/18:1)	1345	TRUE	0.218203	0.240982	-0.0208778	-0.0961468	-0.0358293	-0.0155726	0.0168818	0.280703	-0.770548	0.217136	0.00299025	0.771257	0.0901946	0.670935	1.54422e-09	0.000132148	0.895048	0.690299	0.070507	0.89478
690	1-stearoyl-GPC (18:0)	1345	TRUE	0.320225	-0.0789537	-0.0189233	0.260519	-0.320146	0.0131686	-0.0361899	5.36479	-0.132852	0.0463603	0.284715	0.771947	4.42874e-07	2.97445e-05	1.93968e-08	2.01396e-19	0.00555385	0.939771	0.59052	0.89478
679	2-palmitoyl-GPE (16:0)*	1345	TRUE	0.708585	0.0495357	0.0196603	-0.0404631	0.0703838	0.0093184	-0.0423948	6.85953	-1.42612	2.7753e-05	0.523369	0.774648	0.455856	0.382777	0.000157236	1.035e-23	0.000748482	0.440602	0.772093	0.896519
[truncated: 122 more rows]

## Sheet: Enrichment
Positive APOE E2 Associations: Enriched Sub-Pathways
	total_size	total_in_set	overall_test_size	test_in_set_aka_overlap	pvalue	bon_adj_pvalue	fdr_adj_pvalue
[truncated: 26 more rows]

## Sheet: Pre-Adjusted Enrichment
Positive APOE E2 Associations: Enriched Sub-Pathways
[truncated: 47 more rows]

[truncated: 5 more sheets: Female APOE, Male APOE, Female Delta Age, Male Delta Age, Pre-Adjusted Enrichment, sex st]
