# Supplementary material for: APOE genotype and biological age impact inter-omic associations related to bioenergetics
Source: Aging (Albany NY). 2025 May 3;17(5):1105–38. doi: 10.18632/aging.206243 (PMC12151507; doi:10.18632/aging.206243)
Supplement: Supplementary File 2 [file aging-17-206243-s004.xlsx]

## Sheet: Explainer
Supplementary File 2. contains the results data for the discovery cohort (Arivale) individual metabolite abundance analysis, stratified by chronological age tertiles.
tab0: Expaliner tab
E2 defined as E2/E2 and E2/E3; E4 defined as E3/E4 and E4/E4; E3 defined as E3/E3
Bio_Young defined as biological age 7.5 years less than chron age, Bio_Old defined as biological age 7.5 years older than chronological age (CA)
896 metabolites from Metabolon after removing those with >20% missingness, RF imputation
p adj by FDR Benjamini-Hochberg, FDR set to 5%
lowest CA tertile [18-43] years; middle CA tertile (43-53] years; highest CA tertile (53-87] years
tabs 1-3, stratifying by CA tertile: log2(z-scored metabolite) = intercept + Bio_Young + Bio_Old + age + sex(M) + BMI + cholesterol_meds(Yes) + Genetic_Principal_Component_1 + Genetic_Principal_Component_2 + e
tab4: tables summarizing overlap between CA tertile-stratified delta age status analysis results and those from the non-stratified analysis (Supplmentary File 1)
tabs 5-7, stratifying by CA tertile: log2(z-scored metabolite) = intercept + E2 + E4 + age + sex(M) + BMI + cholesterol_meds(Yes) + Genetic_Principal_Component_1 + Genetic_Principal_Component_2 + e

## Sheet: Delta_Age_Bottom_CA
	col1	n	converged	Intercept	C(Delta_Age_Status_Indiv)[T.Bio_Old]	C(Delta_Age_Status_Indiv)[T.Bio_Young]	C(sex)[T.M]	meds_cholesterol[T.Yes]	age	BMI_CALC	PC1	PC2	Intercept_p	C(Delta_Age_Status_Indiv)[T.Bio_Old]_p	C(Delta_Age_Status_Indiv)[T.Bio_Young]_p	C(sex)[T.M]_p	meds_cholesterol[T.Yes]_p	age_p	BMI_CALC_p	PC1_p	PC2_p	Bio_Young_pval_adj	Bio_Old_pval_adj
437	sphingosine	434	TRUE	-0.384107	-0.137758	0.581717	0.0872117	-0.091131	-0.00742084	0.0222117	2.89106	-2.24853	0.27266	0.239093	9.03135e-05	0.34554	0.730734	0.391235	0.00158613	0.311787	0.378201	0.0809209	0.65223
564	1-linoleoyl-GPI (18:2)*	434	TRUE	-1.02636	0.214346	-0.545312	-0.0796058	-0.189284	0.0249161	0.0035708	-4.19976	-1.85014	0.00325895	0.0659634	0.000229552	0.387447	0.473058	0.00385768	0.610281	0.140244	0.466724	0.102839	0.381313
709	X - 17357	434	TRUE	-1.3205	-0.153972	0.522934	0.87487	-0.339828	-0.00450975	0.0339373	1.57767	-2.46814	0.000150782	0.186062	0.000404728	1.92044e-21	0.197164	0.600547	1.237e-06	0.579103	0.331021	0.120879	0.580367
593	serotonin	434	TRUE	0.429803	-0.0900283	0.509398	0.0212506	0.101643	-0.018705	0.00846625	0.174652	1.82151	0.232766	0.454501	0.000859221	0.823192	0.709035	0.0356495	0.241865	0.952632	0.487697	0.192465	0.774207
95	5alpha-pregnan-3beta,20alpha-diol monosulfate (2)	434	TRUE	0.854062	-0.288631	0.471195	-0.71141	-0.0314338	-0.00532996	-0.00325398	7.81139	4.92786	0.0122048	0.011263	0.00111965	2.65398e-15	0.902921	0.526902	0.634479	0.00498361	0.047213	0.200642	0.229356
61	sphinganine	434	TRUE	-0.43038	-0.115315	0.465017	0.00799608	0.0447027	0.000503196	0.0135387	3.76358	-1.84716	0.211723	0.316691	0.00147253	0.929977	0.86381	0.952896	0.050457	0.180934	0.462012	0.219898	0.695477
543	4-hydroxychlorothalonil	434	TRUE	-0.439567	-0.107255	0.48923	0.32068	0.162741	0.0121741	-0.0113439	5.92546	0.122536	0.242412	0.393366	0.00216777	0.00123863	0.56712	0.190267	0.133072	0.0535468	0.964331	0.257791	0.744623
248	1-arachidonoyl-GPI (20:4)*	434	TRUE	-1.13063	-0.0112857	-0.443624	0.413595	-0.00919697	0.0217515	0.00156084	-7.07014	2.1367	0.00143046	0.924127	0.00319467	9.99355e-06	0.972641	0.0130801	0.826523	0.0145832	0.4083	0.257791	0.979579
717	1-palmitoyl-GPI (16:0)	434	TRUE	-1.37151	0.214508	-0.427425	-0.111581	-0.340263	0.0407195	-0.00475066	5.77764	1.16465	7.08116e-05	0.0629298	0.00351802	0.220829	0.192377	1.81777e-06	0.493148	0.0403009	0.643334	0.257791	0.381313
16	X - 16570	434	TRUE	-0.599117	-0.097033	-0.414365	-0.155886	-0.0402516	0.0106306	0.00908088	8.82729	-4.13783	0.0758185	0.389525	0.00380387	0.0801885	0.874665	0.202481	0.180264	0.00135182	0.0924212	0.257791	0.742583
265	gamma-tocopherol/beta-tocopherol	434	TRUE	-1.42122	0.123158	-0.426653	0.10662	-0.0557585	0.00144029	0.0504227	-4.91728	-4.21188	4.64189e-05	0.290894	0.00395657	0.247183	0.832651	0.867381	6.24648e-13	0.0842783	0.0976348	0.257791	0.686549
534	glycine conjugate of C10H14O2 (1)*	434	TRUE	-0.549733	-0.203666	-0.412713	0.290837	0.570312	-0.0134642	0.0334141	4.92303	-3.99172	0.103732	0.0712696	0.00399296	0.0011141	0.0256136	0.106929	8.47558e-07	0.074262	0.104965	0.257791	0.394183
379	pregnanediol-3-glucuronide	434	TRUE	0.840385	-0.142951	0.413699	-0.745865	-0.221081	0.00389308	-0.01199	9.57286	5.44615	0.0135927	0.209058	0.00419535	1.08405e-16	0.390621	0.643719	0.0795791	0.000573492	0.0281846	0.257791	0.61617
425	1-stearoyl-2-oleoyl-GPS (18:0/18:1)	434	TRUE	-0.050474	-0.084192	0.429663	0.105121	0.0460518	-0.015242	0.0210683	1.40848	-0.188615	0.886752	0.477177	0.00427512	0.2613	0.863577	0.081883	0.00307767	0.626358	0.94178	0.257791	0.780835
179	5alpha-pregnan-3beta,20beta-diol monosulfate (1)	434	TRUE	0.624784	-0.236153	0.40911	-0.737203	-0.27658	0.000780002	0.000585226	0.069662	3.32786	0.0643871	0.0364513	0.0043157	1.39865e-16	0.278965	0.925577	0.931261	0.979845	0.176419	0.257791	0.300873
651	5alpha-pregnan-3beta,20alpha-diol disulfate	434	TRUE	0.422678	-0.172201	0.393418	-0.712033	-0.136171	0.000414947	0.00497164	0.746411	4.66823	0.208218	0.124975	0.0057698	9.82411e-16	0.591872	0.960137	0.461098	0.785425	0.0564723	0.303585	0.504402
503	dihomo-linolenoylcarnitine (C20:3n3 or 6)*	434	TRUE	-0.347369	-0.106044	0.401281	0.77996	-0.00114488	0.00681027	-0.0103272	3.15028	-1.82479	0.314614	0.358298	0.00618691	1.21805e-17	0.996503	0.425113	0.136603	0.263899	0.468502	0.303585	0.719713
672	N-acetylalliin	434	TRUE	0.193699	-0.126101	-0.436184	0.00805864	-0.376388	-0.00043582	-0.00500253	0.64322	2.98456	0.606696	0.315928	0.00629462	0.935352	0.185911	0.962625	0.507979	0.834117	0.276369	0.303585	0.695477
450	X - 12844	434	TRUE	-1.44907	-0.0479694	0.422468	0.750428	-0.799946	0.00490122	0.0309602	4.78018	-4.90741	8.1972e-05	0.696428	0.00680711	1.12106e-14	0.00403912	0.589934	2.79061e-05	0.111459	0.0671903	0.303585	0.907276
320	taurine	434	TRUE	0.316961	-0.117483	0.430872	0.0648483	0.0765751	-0.00842613	-0.00529224	4.29616	-1.28155	0.399938	0.350513	0.00700399	0.514261	0.788002	0.365322	0.484064	0.162206	0.640475	0.303585	0.719209
251	spermidine	434	TRUE	-0.365098	0.122377	0.421821	0.381018	-0.228046	0.00136323	0.00304034	4.43094	-3.03528	0.322937	0.321481	0.00711528	9.35584e-05	0.414268	0.881308	0.681922	0.141671	0.259456	0.303585	0.695766
287	nicotinamide	434	TRUE	0.348566	-0.283341	0.400848	0.138773	0.240137	-0.0139872	0.00674579	-1.43106	-1.1938	0.327802	0.0173005	0.00799974	0.140087	0.372683	0.112153	0.34571	0.622596	0.64558	0.320186	0.254118
522	phosphoethanolamine	434	TRUE	0.32263	-0.197522	0.395079	0.00981129	-0.0162734	-0.0115705	0.00430054	0.760819	-0.51442	0.359774	0.0933973	0.00821906	0.916	0.951294	0.183945	0.543311	0.791343	0.841182	0.320186	0.435854
134	X - 23587	434	TRUE	-0.214516	0.236627	-0.358289	0.289619	-0.553461	0.00354086	-0.0079789	-5.18248	3.28745	0.504717	0.0276704	0.00864429	0.000647389	0.0228525	0.655985	0.216671	0.0483435	0.160647	0.32272	0.300873
841	sphingosine 1-phosphate	434	TRUE	0.165391	-0.0594177	0.425058	0.235681	-0.32867	-0.00142343	-0.00632374	6.89113	0.18929	0.670768	0.647679	0.0100321	0.0217811	0.263968	0.882335	0.418352	0.0300198	0.946769	0.357221	0.881779
869	X - 24337	434	TRUE	-1.39897	0.0287011	-0.363391	0.440277	-0.0740201	-0.00389719	0.0500631	3.03771	-0.180252	3.37564e-05	0.799062	0.0111361	7.72074e-07	0.771728	0.640274	1.48651e-13	0.270017	0.941554	0.357221	0.953114
231	3-phosphoglycerate	434	TRUE	-0.00990435	-0.149964	0.401295	0.272307	-0.00464554	-0.0073527	0.00610982	1.99155	-1.98451	0.978805	0.228713	0.0111879	0.00567033	0.986854	0.42494	0.414499	0.512836	0.465096	0.357221	0.640888
866	X - 12462	434	TRUE	0.422869	0.2043	-0.435796	0.367318	0.150245	-0.00923999	-0.00631665	-11.1117	-4.17725	0.2974	0.131949	0.0113789	0.000608044	0.624437	0.356977	0.438328	0.000795402	0.157783	0.357221	0.5054
293	1-stearoyl-GPI (18:0)	434	TRUE	-1.6508	0.249011	-0.368989	0.142064	-0.332479	0.0471774	-0.0104721	0.604728	1.81281	1.65871e-06	0.0305725	0.011608	0.118399	0.201958	3.03652e-08	0.130203	0.829758	0.470293	0.357221	0.300873
849	sulfate*	434	TRUE	-1.14998	0.126893	-0.376399	-0.312466	0.537729	0.0212241	0.0139294	5.89409	-1.44054	0.0011212	0.282006	0.0119605	0.000799774	0.0439436	0.0149841	0.0494079	0.0407745	0.575416	0.357221	0.680313
798	beta-citrylglutamate	434	TRUE	-0.778301	-0.00611052	0.393089	0.125271	0.131311	0.00191582	0.0167783	3.41269	-2.16603	0.0367367	0.960863	0.0129142	0.202944	0.641228	0.83523	0.0249646	0.261873	0.425049	0.367059	0.989579
435	6-bromotryptophan	434	TRUE	0.492133	-0.110481	0.373582	0.428289	0.153566	-0.0102973	-0.00765078	8.96285	-3.67542	0.165539	0.351578	0.0131092	4.86714e-06	0.5672	0.240469	0.2831	0.00197561	0.155265	0.367059	0.719209
773	ceramide (d18:1/14:0, d16:1/16:0)*	434	TRUE	-2.14171	0.250421	0.371895	-0.0698899	-0.077766	0.032173	0.0288568	5.82263	-7.47048	1.98826e-09	0.0358265	0.014093	0.458462	0.773325	0.000266712	5.71155e-05	0.0457228	0.00408632	0.382646	0.300873
345	sphinganine-1-phosphate	434	TRUE	-0.0672316	0.000738732	0.393185	0.0204904	-0.16437	0.00802959	-0.00908598	8.15355	0.218348	0.860038	0.995374	0.0150886	0.838723	0.568645	0.394235	0.235423	0.00880045	0.937363	0.39763	0.997683
589	propionylglycine	434	TRUE	0.0111698	0.0335897	-0.364097	0.00435162	-0.297857	0.0238049	-0.0314293	8.2373	-1.01412	0.975209	0.779756	0.016975	0.963429	0.273176	0.0073778	1.33854e-05	0.00499293	0.698626	0.434423	0.942863
176	5,6-dihydrothymine	434	TRUE	-0.981978	0.221787	0.37323	0.374803	-0.307882	0.0117892	0.00796821	0.613327	-0.187819	0.00843463	0.0750263	0.018298	0.000140234	0.274783	0.200756	0.287203	0.840264	0.944879	0.434423	0.398891
311	inosine	434	TRUE	-0.28552	0.0614328	0.388486	0.0488998	0.232432	-0.00699658	0.0168637	1.23838	-3.0561	0.462285	0.636011	0.0184157	0.633504	0.428766	0.466162	0.0306357	0.696101	0.280259	0.434423	0.870025
301	methylsuccinate	434	TRUE	0.0078798	-0.126903	0.369559	-0.115022	-0.168406	-9.51773e-05	-0.00603582	5.59571	0.83562	0.983008	0.304704	0.0185684	0.239024	0.547235	0.991696	0.416617	0.0639	0.756603	0.434423	0.695477
403	choline phosphate	434	TRUE	0.588691	-0.283614	0.354313	0.299358	-0.0862989	-0.00842673	-0.0112207	0.170257	2.81749	0.0979515	0.0170455	0.018909	0.00143719	0.748368	0.337894	0.116289	0.953244	0.277087	0.434423	0.254118
740	X - 15486	434	TRUE	-0.881407	-0.0863247	-0.343575	0.0915933	0.306232	-0.00805438	0.0388693	-0.630214	-3.54894	0.0111103	0.456772	0.0196654	0.317631	0.243378	0.347874	2.46841e-08	0.823988	0.160607	0.440505	0.774427
270	oleoyl ethanolamide	434	TRUE	-0.339532	-0.050359	0.346072	-0.0566028	-0.532739	0.011578	-0.00767415	0.690776	3.04515	0.334597	0.668472	0.0204606	0.542388	0.0452879	0.18315	0.27753	0.80995	0.235008	0.444461	0.886134
568	isovalerylglycine	434	TRUE	-0.157127	0.0874992	-0.328141	0.0976971	-0.508464	0.0205688	-0.0244143	4.97247	0.479649	0.639879	0.435603	0.0212945	0.270574	0.0452789	0.0132202	0.000294973	0.0696975	0.844615	0.444461	0.765295
219	cysteine s-sulfate	434	TRUE	-0.0381904	-0.0287366	0.364333	0.12269	0.142299	0.0164951	-0.0245642	8.4499	-0.981559	0.91864	0.818094	0.021644	0.213938	0.614762	0.0742819	0.00107035	0.00562715	0.718642	0.444461	0.953114
753	10-nonadecenoate (19:1n9)	434	TRUE	-0.700856	-0.173545	0.352161	-0.240618	0.363073	0.00961225	0.0113229	-3.86239	-1.3043	0.0527862	0.151285	0.0218262	0.0117974	0.184617	0.282569	0.119259	0.19104	0.620887	0.444461	0.529497
724	dimethylarginine (SDMA + ADMA)	434	TRUE	-0.122602	0.248311	0.338891	0.34702	-0.424575	-0.0069985	-0.00561171	2.49895	0.948641	0.728756	0.0355785	0.0238791	0.000201277	0.112281	0.423223	0.429335	0.386533	0.712709	0.465322	0.300873
258	X - 24728	434	TRUE	-1.63948	0.204738	-0.3322	0.585731	-0.161412	0.0203148	0.0137219	-0.682684	-0.360801	2.24108e-06	0.0771131	0.0238893	1.54868e-10	0.537999	0.017726	0.0486876	0.809317	0.886402	0.465322	0.404054
847	palmitoylcarnitine (C16)	434	TRUE	-1.46233	-0.00801385	0.340763	0.832563	-0.0886038	0.0282898	-0.00227202	-5.99451	0.0323111	4.22674e-05	0.946463	0.0245288	1.05419e-18	0.742854	0.00135191	0.751418	0.03975	0.990094	0.467612	0.983795
490	urea	434	TRUE	-0.835638	0.313208	-0.298053	0.777913	-0.0548465	0.0202997	-0.0164453	2.79135	-1.09813	0.00780541	0.00284659	0.0253333	6.62543e-21	0.817395	0.00893474	0.0091374	0.276295	0.631396	0.472888	0.100885
510	trans-urocanate	434	TRUE	0.684078	0.00388038	0.341006	-0.24343	-0.319262	-0.0173159	0.000137126	-0.649943	0.0992141	0.0617765	0.974707	0.0282056	0.0118232	0.24901	0.0557711	0.985126	0.827887	0.970344	0.515759	0.994905
535	1-oleoyl-GPI (18:1)	434	TRUE	-0.807526	0.289119	-0.323687	0.0206963	-0.0605828	0.0437628	-0.0313977	2.32157	6.87908	0.0219085	0.0140683	0.0303779	0.823949	0.820132	5.0341e-07	9.11708e-06	0.419539	0.00737703	0.536506	0.241797
384	glucuronide of piperine metabolite C17H21NO3 (3)*	434	TRUE	-1.36604	-0.133411	-0.335118	0.400225	0.501122	0.014609	0.0273983	-1.80192	-4.6051	0.000240427	0.283183	0.033743	4.6066e-05	0.0748503	0.112102	0.000245122	0.552895	0.0893475	0.536506	0.680313
725	1-linoleoyl-2-linolenoyl-GPC (18:2/18:3)*	434	TRUE	0.813041	0.131518	-0.30165	-0.287817	-0.0732116	0.0113083	-0.0374573	2.63587	-2.20095	0.0155084	0.241383	0.0343239	0.00117508	0.773202	0.173242	2.82528e-08	0.336422	0.368597	0.536506	0.65223
127	pro-hydroxy-pro	434	TRUE	1.34542	-0.0645883	-0.306568	0.600416	-0.520322	-0.0369076	-0.0101975	5.88787	1.21814	8.18337e-05	0.5715	0.0344085	2.78714e-11	0.0439695	1.23434e-05	0.137139	0.0347062	0.624554	0.536506	0.828582
310	1-palmityl-2-stearoyl-GPC (O-16:0/18:0)*	434	TRUE	-0.636637	0.275449	0.348682	-0.00851861	-0.215968	0.0223859	-0.00992898	6.204	0.844472	0.10137	0.0339193	0.0344645	0.933836	0.462408	0.0197809	0.203311	0.0504899	0.765544	0.536506	0.300873
643	X - 12798	434	TRUE	-0.502219	0.0042577	0.308369	0.367251	-0.30813	-0.0201312	0.0336167	4.28909	-1.07404	0.144246	0.970451	0.0346054	5.25772e-05	0.236161	0.0178902	1.13595e-06	0.12659	0.668269	0.536506	0.994209
545	laurate (12:0)	434	TRUE	1.04997	-0.249242	0.311219	-0.629933	-0.129636	-0.00763921	-0.0195139	0.155197	2.48451	0.00258477	0.0323232	0.0353002	7.56193e-12	0.622752	0.37512	0.0052972	0.956486	0.327848	0.536506	0.300873
828	oleoylcarnitine (C18:1)	434	TRUE	-0.551157	0.0357912	0.305107	0.512118	-0.161786	0.0241013	-0.0277789	-6.18867	0.272424	0.109653	0.755903	0.0368807	1.80656e-08	0.534626	0.00465336	5.95353e-05	0.0277654	0.913591	0.536506	0.929496
427	N-acetylmethionine	434	TRUE	0.110734	-0.158713	0.328245	-0.214621	-0.853858	-0.0132455	0.0127729	7.14028	4.25272	0.765136	0.200095	0.0368881	0.0283164	0.00231827	0.148272	0.0862054	0.01828	0.115384	0.536506	0.605537
574	N-acetylcarnosine	434	TRUE	-0.508306	-0.280341	-0.236739	1.34762	-0.352871	0.00054079	0.00311577	-2.86193	-0.0440968	0.0579548	0.00175316	0.0374207	8.28867e-81	0.0817656	0.934958	0.562802	0.190939	0.981991	0.536506	0.0981771
752	ceramide (d18:1/17:0, d17:1/18:0)*	434	TRUE	-2.22222	0.171625	0.341464	0.340442	0.0187952	0.0290599	0.0283755	-3.56128	-0.0642403	9.37786e-09	0.184535	0.0375968	0.00086437	0.948799	0.00238516	0.000261806	0.259643	0.981828	0.536506	0.580152
705	arachidonoylcarnitine (C20:4)	434	TRUE	-0.0695374	-0.131177	0.297867	1.05773	-0.0863325	0.00250476	-0.0195107	0.272493	4.18611	0.836944	0.24534	0.0377441	2.00475e-32	0.735459	0.764249	0.00403828	0.921298	0.0890992	0.536506	0.653596
498	X - 18901	434	TRUE	1.40039	-0.000341251	0.309811	-0.190426	0.37799	-0.00658707	-0.0406331	11.6668	-3.13622	6.81662e-05	0.997683	0.0378519	0.0402658	0.155178	0.448533	8.7294e-09	4.80931e-05	0.220965	0.536506	0.997683
211	ribitol	434	TRUE	-1.1502	0.131222	0.316293	0.128604	0.679798	-0.0036381	0.0381756	-3.19915	-3.69867	0.00140983	0.275744	0.03854	0.176396	0.0125898	0.682879	1.31937e-07	0.276658	0.158876	0.536506	0.675045
760	X - 21441	434	TRUE	0.350275	0.24134	-0.300192	0.356326	-0.38732	-0.0126461	0.00768409	-6.63882	1.57985	0.306994	0.0351887	0.0390863	8.29503e-05	0.135254	0.13568	0.264497	0.0176952	0.527202	0.536506	0.300873
420	pentadecanoate (15:0)	434	TRUE	-0.408308	-0.246152	0.308691	-0.132917	0.216274	0.00307751	0.00720732	0.116986	-1.19334	0.247017	0.0367674	0.0391511	0.153519	0.417466	0.724096	0.308945	0.967589	0.642439	0.536506	0.300873
13	S-allylcysteine	434	TRUE	0.755812	-0.153692	-0.320819	0.0290902	-0.228666	-0.00815763	-0.0107771	-4.40724	-0.705406	0.0395902	0.210471	0.0395194	0.764186	0.410318	0.368853	0.14398	0.141522	0.792101	0.536506	0.61628
822	deoxycholate	434	TRUE	0.197894	0.0305511	-0.317334	0.0842678	0.425498	-0.00483225	-0.000916555	-6.498	-3.14483	0.587836	0.802297	0.04054	0.382092	0.123329	0.592373	0.900535	0.0292453	0.237235	0.542147	0.953114
228	4-chlorobenzoic acid	434	TRUE	-0.314705	0.0686966	-0.348455	0.0725599	-0.409224	0.0079911	-0.00204565	0.497088	-1.34897	0.43439	0.609624	0.0413676	0.494866	0.178905	0.421963	0.800267	0.879768	0.645646	0.545079	0.853444
508	1-pentadecanoyl-2-docosahexaenoyl-GPC (15:0/22:6)*	434	TRUE	-0.299166	0.0532011	0.30185	-0.186743	-0.46935	0.0410875	-0.0439092	0.507342	1.57916	0.400787	0.654794	0.0457247	0.0469985	0.0813187	3.03509e-06	8.2375e-10	0.861426	0.542772	0.592814	0.883103
845	glucuronide of piperine metabolite C17H21NO3 (4)*	434	TRUE	-1.34483	-0.156807	-0.305748	0.428077	0.429262	0.0149829	0.0256005	-0.181109	-5.11506	0.000201655	0.194671	0.0464206	7.4323e-06	0.11668	0.0938714	0.000426573	0.951102	0.0523722	0.592814	0.594816
111	hydantoin-5-propionate	434	TRUE	-1.35453	0.0642767	0.311617	0.470415	0.332259	-0.00505212	0.0404697	0.735531	-0.478963	0.000252012	0.603244	0.0472021	1.47791e-06	0.235135	0.580745	5.1794e-08	0.807626	0.85903	0.592814	0.849075
342	taurocholate	434	TRUE	-0.139605	-0.010775	0.298427	-0.11714	0.0462352	-0.00164771	0.00746241	-12.8683	0.673084	0.694216	0.927652	0.0476368	0.211544	0.863302	0.851096	0.295396	9.01846e-06	0.794776	0.592814	0.979579
132	2-arachidonoyl-GPC (20:4)*	434	TRUE	-0.480849	-0.050802	-0.284462	0.672477	-0.114798	0.0280768	-0.031284	4.62032	7.17202	0.159379	0.656414	0.0497786	9.11444e-14	0.656871	0.000887236	5.15458e-06	0.0976374	0.00397416	0.603609	0.883103
17	carboxyethyl-GABA	434	TRUE	-0.300582	0.138449	0.284503	0.295413	-0.309978	0.0150524	-0.0215507	3.29157	1.53435	0.379727	0.226013	0.0500648	0.00107731	0.230975	0.0751447	0.00171406	0.238635	0.538345	0.603609	0.640847
347	X - 16964	434	TRUE	0.623969	0.16249	0.316782	0.622259	0.335637	-0.0233426	-0.0089661	2.15735	-4.9103	0.102183	0.202808	0.0505253	6.7086e-10	0.245026	0.0133788	0.242265	0.488776	0.0775669	0.603609	0.607747
444	glucuronide of piperine metabolite C17H21NO3 (5)*	434	TRUE	-1.30559	-0.151224	-0.304312	0.397688	0.482651	0.0135668	0.0266006	-1.95343	-3.89882	0.000431584	0.222455	0.0531655	4.89256e-05	0.0853024	0.138936	0.000355765	0.5188	0.149165	0.613412	0.634776
136	10-heptadecenoate (17:1n7)	434	TRUE	-0.554688	-0.208629	0.292973	-0.329393	0.315141	0.00251788	0.0160268	-3.65874	-1.69852	0.120363	0.0804329	0.0531821	0.000477115	0.243242	0.77546	0.0254451	0.209433	0.513952	0.613412	0.404876
445	palmitoyl ethanolamide	434	TRUE	-1.06062	-0.116801	0.305598	0.0671764	-0.553276	0.0146961	0.0139894	0.872835	2.13332	0.00460241	0.350416	0.0543335	0.496686	0.0506246	0.112188	0.062751	0.775125	0.434132	0.613412	0.719209
599	sulfate of piperine metabolite C18H21NO3 (1)*	434	TRUE	-0.224032	-0.271401	-0.277662	0.386184	0.0430282	0.00978254	-0.000668163	-5.58999	-4.60635	0.511228	0.0172464	0.0550083	1.79714e-05	0.867495	0.24585	0.922287	0.0446354	0.0638003	0.613412	0.254118
31	X - 11470	434	TRUE	0.273524	-0.187635	-0.298587	0.728953	-0.370648	-0.00181446	-0.0146922	7.55297	1.22134	0.457677	0.127377	0.0560481	6.57927e-14	0.183259	0.842019	0.0469999	0.0119922	0.649052	0.613412	0.505001
778	X - 23780	434	TRUE	0.185835	-0.0769305	-0.289741	0.159707	-0.210272	-0.000107378	-0.00665429	6.79852	-1.997	0.603131	0.519552	0.0560872	0.0906133	0.436632	0.990303	0.353959	0.0198018	0.443266	0.613412	0.806791
746	N-behenoyl-sphingadienine (d18:2/22:0)*	434	TRUE	-1.46616	0.150054	-0.313558	0.0702959	0.386588	0.0291296	0.00802224	-4.73456	-3.5791	0.00015097	0.245828	0.0561382	0.491387	0.186413	0.00231992	0.301886	0.13384	0.204278	0.613412	0.653596
283	1-palmitoyl-2-(hydroxylinoleoyl)-GPC (16:0/18:2(OH))*	434	TRUE	-0.321383	0.126015	-0.284899	-0.0873838	-0.0428151	0.0242177	-0.0177108	1.99625	-3.60719	0.36371	0.286538	0.0577425	0.34961	0.872871	0.00562205	0.0126903	0.489451	0.161801	0.623341	0.682815
386	2-piperidinone	434	TRUE	-0.0890164	-0.0324876	-0.274414	0.365586	0.171486	-0.000347257	0.00371748	-18.5643	-1.88556	0.795379	0.77701	0.0595528	5.49091e-05	0.508848	0.967353	0.589716	3.458e-11	0.450951	0.63523	0.940812
172	gamma-glutamylphenylalanine	434	TRUE	-1.60381	-0.00247266	0.258814	0.742616	0.37711	-0.00624693	0.0449932	2.02965	0.795126	1.1665e-06	0.982107	0.0644855	1.5304e-17	0.130662	0.44366	1.11818e-11	0.45105	0.740846	0.674435	0.995439
470	X - 17653	434	TRUE	1.33721	-0.1137	-0.259321	0.40759	0.214764	-0.0295724	-0.00791579	-5.77533	-0.420994	5.4428e-05	0.304496	0.0651147	3.18039e-06	0.39139	0.000305346	0.234233	0.0327342	0.861582	0.674435	0.695477
182	glycine conjugate of C10H12O2*	434	TRUE	-0.428571	-0.0371216	-0.261552	0.303065	0.119727	-0.0141189	0.0307998	5.24388	-1.51739	0.203814	0.741876	0.0675928	0.00066571	0.638757	0.0903307	5.43689e-06	0.0568023	0.536954	0.674435	0.928248
560	1-(1-enyl-palmitoyl)-2-linoleoyl-GPE (P-16:0/18:2)*	434	TRUE	0.181949	0.406103	-0.282364	0.270351	-0.275424	-0.00407621	-0.00410402	-12.7791	0.602433	0.617536	0.000852764	0.0678056	0.00495413	0.317536	0.650854	0.574927	1.73508e-05	0.820513	0.674435	0.0618101
344	androstenediol (3beta,17beta) disulfate (1)	434	TRUE	-0.471638	0.225643	-0.235749	0.845989	-0.576172	0.00187283	0.0127785	-6.98994	-4.74418	0.121328	0.0265613	0.0680005	6.67156e-26	0.0123267	0.803456	0.0366212	0.00491108	0.032475	0.674435	0.300873
308	androstenediol (3beta,17beta) monosulfate (2)	434	TRUE	0.229469	0.177772	-0.245449	0.0398878	-0.484587	-0.00488781	0.00916055	-3.77313	-3.19237	0.470151	0.0940709	0.068661	0.634454	0.0437131	0.533696	0.15112	0.145711	0.167944	0.674435	0.436723
274	alpha-tocopherol	434	TRUE	-1.22739	0.399841	-0.306422	0.178685	-0.344847	0.0382479	-0.0136142	-5.68995	6.1073	0.0021119	0.00273	0.0705053	0.0900968	0.253422	0.000106453	0.0895563	0.0808443	0.035813	0.674435	0.100885
831	taurochenodeoxycholate	434	TRUE	0.078392	-0.0907345	0.27802	-0.0436644	0.253183	-0.00570246	0.00585765	-10.7544	0.589348	0.829	0.45442	0.0710359	0.648662	0.356308	0.525026	0.421641	0.000283499	0.823669	0.674435	0.774207
129	margarate (17:0)	434	TRUE	-0.879106	-0.339307	0.281192	0.0187704	0.181959	0.0113918	0.0114919	-7.39685	-2.50073	0.0166477	0.00568449	0.0710808	0.846471	0.512243	0.20939	0.119118	0.0135829	0.349948	0.674435	0.169777
807	1-linoleoyl-2-docosahexaenoyl-GPC (18:2/22:6)*	434	TRUE	0.255136	0.252236	-0.260592	0.199653	-0.3323	0.0386691	-0.0661926	1.22881	7.20855	0.454625	0.0269628	0.071881	0.02669	0.197819	4.54462e-06	4.49973e-22	0.65908	0.00374214	0.674435	0.300873
469	hydroxy-N6,N6,N6-trimethyllysine*	434	TRUE	-0.379193	-0.00768294	-0.260501	0.694522	-0.222778	-0.011032	0.00687704	-0.927388	-2.43978	0.266581	0.946297	0.0720651	1.29368e-14	0.388087	0.191005	0.315753	0.739238	0.326627	0.674435	0.983795
300	X - 15492	434	TRUE	-2.18613	0.088458	-0.248546	0.840495	-0.234495	0.0212917	0.0358342	2.45562	-2.78148	1.96681e-11	0.416637	0.0722609	1.54395e-22	0.341334	0.00821142	4.3706e-08	0.355932	0.241477	0.674435	0.758133
827	margaroylcarnitine (C17)*	434	TRUE	-1.33769	-0.0105136	0.278823	0.703514	-0.138445	0.0316475	-0.00999533	-4.8781	0.783945	0.000263855	0.931621	0.0731009	3.67904e-13	0.617562	0.00047947	0.174662	0.103122	0.769206	0.675241	0.980884
806	stearoyl-arachidonoyl-glycerol (18:0/20:4) [1]*	434	TRUE	-1.12632	0.227978	0.265485	0.271614	0.419381	0.0294252	-0.0070938	3.60595	7.74095	0.00142066	0.0533114	0.0763465	0.00357034	0.116215	0.000746263	0.317068	0.210819	0.00262087	0.689959	0.346138
796	stearoyl-arachidonoyl-glycerol (18:0/20:4) [2]*	434	TRUE	-1.24792	0.284491	0.298992	0.167979	-0.278082	0.020446	0.00929679	-4.67018	2.06238	0.00172035	0.0324823	0.0767247	0.110034	0.35565	0.0377296	0.244922	0.150674	0.477132	0.689959	0.300873
405	X - 12411	434	TRUE	-1.26499	0.156843	-0.241641	0.391404	0.148388	0.00998272	0.0204468	2.83679	-0.683316	9.02573e-05	0.146311	0.0779579	4.47144e-06	0.543625	0.211289	0.00162634	0.282076	0.771633	0.689959	0.520217
97	3-hydroxyhippurate	434	TRUE	0.0870757	0.147031	0.27069	0.00151191	0.0770448	-0.000393805	-0.00702404	2.06283	-2.10929	0.812212	0.229984	0.0817652	0.987535	0.781041	0.965329	0.33998	0.490517	0.429681	0.689959	0.640888
755	1-pentadecanoyl-GPC (15:0)*	434	TRUE	-0.31534	-0.0229711	0.262202	0.187103	0.0183755	0.029722	-0.0308109	10.9177	-2.69381	0.374645	0.846548	0.0819054	0.0460419	0.945459	0.000710957	1.56638e-05	0.000166165	0.297986	0.689959	0.957711
408	X - 23739	434	TRUE	-0.33507	0.0765523	-0.261939	0.634444	-0.105822	0.0113675	-0.0146925	3.28366	-0.46519	0.346009	0.519411	0.0825348	1.40167e-11	0.693912	0.195877	0.0396429	0.257903	0.857515	0.689959	0.806791
44	maltotriose	434	TRUE	-0.743101	-0.0784613	0.276233	0.161184	0.103371	-0.00173569	0.0249673	-2.21174	-1.33798	0.0476835	0.531547	0.0827823	0.103804	0.715671	0.85157	0.00092402	0.470279	0.624647	0.689959	0.813058
772	4-ethylphenylsulfate	434	TRUE	1.57939	0.0765396	-0.284426	-0.0596253	-0.128774	-0.0105193	-0.0432231	4.64929	-2.54353	4.82441e-05	0.555634	0.0845627	0.561202	0.661269	0.273499	3.06418e-08	0.142762	0.36911	0.689959	0.827114
119	isoleucylglycine	434	TRUE	0.0640214	0.0577473	-0.258456	0.292343	-0.188475	0.00676138	-0.0174526	-0.330463	-2.94045	0.856322	0.625055	0.0849578	0.00174092	0.480909	0.439174	0.013988	0.908847	0.253796	0.689959	0.863468
205	X - 12849	434	TRUE	0.038319	0.112704	-0.259312	-0.0272026	-0.0649937	-0.00199864	0.00205555	-4.31005	4.55452	0.914314	0.343641	0.0861576	0.772362	0.809302	0.82039	0.773812	0.13817	0.0792571	0.689959	0.71439
377	N-acetylneuraminate	434	TRUE	-0.981142	0.142523	0.276361	-0.0466133	-0.146445	0.0116749	0.0124758	2.27473	5.01633	0.00977255	0.261388	0.0863125	0.642004	0.610076	0.213565	0.101871	0.463033	0.0698592	0.689959	0.663925
556	aspartate	434	TRUE	-0.890605	-0.123677	0.239197	0.336566	0.278426	-0.00313939	0.0329122	2.45044	-5.33225	0.00687728	0.261391	0.0871309	0.000109624	0.263866	0.69992	6.58901e-07	0.362289	0.0263768	0.689959	0.663925
625	2-hydroxyhippurate (salicylurate)	434	TRUE	0.106905	0.0104978	-0.236063	0.0435804	0.180791	0.00146255	-0.0108871	2.17061	5.47652	0.742898	0.923214	0.0878188	0.612556	0.463232	0.855936	0.096256	0.414548	0.0211126	0.689959	0.979579
451	X - 12812	434	TRUE	-0.0671844	-0.0928973	-0.262516	-0.218669	0.52369	0.0102283	-0.00754254	-1.06603	1.36705	0.853795	0.445778	0.0897064	0.0231153	0.0575085	0.256383	0.302967	0.720187	0.606861	0.689959	0.771421
1	4-guanidinobutanoate	434	TRUE	0.519124	-0.144331	-0.228274	0.712909	-0.144798	-0.00809761	-0.0179642	6.52225	2.09819	0.102348	0.174121	0.0904729	1.95766e-17	0.546827	0.302598	0.00488256	0.0119248	0.364902	0.689959	0.565738
252	X - 13835	434	TRUE	-1.09935	0.220337	-0.23702	0.801564	-0.56446	0.00617299	0.0182553	4.12251	-1.06057	0.000885538	0.0461632	0.0911732	4.29385e-20	0.0239939	0.450114	0.00598171	0.126688	0.659842	0.689959	0.328429
359	taurodeoxycholate	434	TRUE	0.320617	-0.0622225	0.262747	-0.272698	0.0374785	-0.00434924	-0.00434391	-3.88386	2.19378	0.384675	0.61367	0.093162	0.00510611	0.893107	0.633309	0.557579	0.197023	0.414349	0.689959	0.856462
73	ergothioneine	434	TRUE	0.028408	0.142255	-0.250825	0.347859	-0.00851257	0.0203885	-0.0376841	-11.244	1.48468	0.935843	0.227742	0.0939359	0.000189191	0.974555	0.0194276	1.05651e-07	9.49576e-05	0.563729	0.689959	0.640888
610	N2,N5-diacetylornithine	434	TRUE	-0.20094	0.150017	-0.237732	0.284523	0.0222805	0.0219739	-0.0354216	8.88345	8.28928	0.548552	0.180158	0.0943754	0.00129443	0.929905	0.0079509	1.39645e-07	0.0011572	0.000683168	0.689959	0.572416
678	deoxycholic acid (12 or 24)-sulfate*	434	TRUE	-0.01008	-0.0814164	-0.266689	-0.0751502	0.598354	-0.00508225	0.0123672	-2.20119	-3.73143	0.978613	0.517034	0.09462	0.449096	0.0353565	0.584512	0.101494	0.473275	0.173257	0.689959	0.806791
56	X - 23782	434	TRUE	0.678567	0.0239738	0.251296	-0.472809	-0.0687194	0.000460557	-0.0244086	-5.82687	-0.00717941	0.0558	0.839759	0.0950652	4.48564e-07	0.797854	0.958117	0.000613607	0.0442199	0.997784	0.689959	0.956008
656	1-linoleoylglycerol (18:2)	434	TRUE	-1.19953	0.00277659	-0.255087	0.292707	0.0180727	0.0203946	0.00813256	-1.03936	-2.89648	0.000875039	0.98161	0.0953454	0.00210141	0.947138	0.0220759	0.261262	0.723897	0.270137	0.689959	0.995439
632	X - 23974	434	TRUE	-0.357199	0.308519	0.269115	0.126373	-0.217654	0.0216215	-0.0194243	-5.00891	-0.807205	0.3482	0.0153271	0.0957855	0.208775	0.449731	0.0216067	0.0110854	0.107064	0.771118	0.689959	0.248487
612	2-linoleoyl-GPC (18:2)*	434	TRUE	0.560847	0.0866817	-0.233979	0.414184	-0.269938	0.0190484	-0.0514422	3.98125	-1.56581	0.0903737	0.433515	0.095917	2.17622e-06	0.281131	0.0199748	1.04334e-14	0.140841	0.516469	0.689959	0.763123
886	phenylalanine	434	TRUE	-1.2422	-0.103085	0.243787	0.580784	0.0103205	0.00370536	0.0294283	-5.71241	-0.430095	0.000319962	0.371525	0.0960315	1.86498e-10	0.968464	0.664099	2.18776e-05	0.0426306	0.864238	0.689959	0.731366
434	phosphatidylcholine (15:0/18:1, 17:0/16:1, 16:0/17:1)*	434	TRUE	-1.44646	0.162981	0.252116	-0.127112	0.109378	0.0464922	-0.010187	6.6348	1.41328	5.11785e-05	0.172068	0.0961706	0.177667	0.685488	1.38982e-07	0.155533	0.0228508	0.587093	0.689959	0.565738
619	branched-chain, straight-chain, or cyclopropyl 12:1 fatty acid*	434	TRUE	0.696254	-0.224128	0.274564	-0.224517	0.111388	-0.00947112	-0.0112902	-8.51588	0.741009	0.0734785	0.0846908	0.0962286	0.0288252	0.704953	0.324629	0.148426	0.00732091	0.793778	0.689959	0.412407
241	adrenate (22:4n6)	434	TRUE	-0.413284	-0.331537	0.251429	-0.0874219	0.369336	-0.00331892	0.0171286	-3.25928	-0.1861	0.247312	0.00548408	0.0971732	0.354021	0.171581	0.70702	0.0169684	0.263688	0.943008	0.689959	0.169777
362	glutarate (C5-DC)	434	TRUE	-0.331858	0.10717	-0.259239	0.247771	0.241353	0.00146141	0.00679128	-18.8478	-1.98214	0.368101	0.384433	0.0975228	0.0109283	0.386724	0.872608	0.359094	3.79468e-10	0.460687	0.689959	0.737584
595	1-(1-enyl-palmitoyl)-2-docosahexaenoyl-GPE (P-16:0/22:6)*	434	TRUE	0.00445488	0.217917	-0.259635	0.284613	-0.398475	0.014327	-0.0263709	-13.9036	6.47258	0.990383	0.077662	0.0977955	0.00353904	0.153946	0.11681	0.000381161	4.05125e-06	0.0162458	0.689959	0.404565
315	4-methylcatechol sulfate	434	TRUE	0.475471	0.00545655	0.267847	0.0202542	-0.134567	0.000518528	-0.0220756	12.1354	-0.60713	0.214891	0.966028	0.0996513	0.841413	0.642538	0.956363	0.00414249	0.000105369	0.827957	0.697559	0.992616
893	2-hydroxyoctanoate	434	TRUE	0.145978	-0.0758989	-0.236868	0.0757998	-0.156869	-0.0020752	-0.00224997	0.903281	0.532828	0.671799	0.50978	0.10519	0.404735	0.547141	0.807489	0.745068	0.74808	0.831936	0.728182	0.801773
107	X - 21339	434	TRUE	0.0618401	-0.323537	-0.221427	0.365688	0.0452671	-0.0221043	0.0283754	-8.35975	-2.58778	0.847943	0.00268321	0.105651	1.75273e-05	0.852758	0.00555832	1.1827e-05	0.00149595	0.270853	0.728182	0.100885
178	2-aminoheptanoate	434	TRUE	-0.0844543	0.0816213	-0.252721	0.0856164	0.0515994	-0.0162172	0.0190883	0.728126	3.18911	0.819516	0.509343	0.107595	0.381019	0.853747	0.0763094	0.010236	0.809562	0.237065	0.733968	0.801773
795	taurolithocholate 3-sulfate	434	TRUE	1.28274	-0.0811683	0.24086	-0.147983	-0.259739	-0.00896238	-0.0310979	11.575	4.78652	0.00028269	0.491788	0.108129	0.11267	0.33098	0.304772	1.17259e-05	5.98059e-05	0.0630051	0.733968	0.789681
224	10-undecenoate (11:1n1)	434	TRUE	0.153043	-0.10801	0.252676	0.161957	0.234567	0.0100405	-0.0210221	-2.40903	3.83485	0.681224	0.385646	0.109956	0.0996809	0.405088	0.27558	0.00496071	0.428266	0.157787	0.740758	0.73833
650	myo-inositol	434	TRUE	-0.821533	0.0952814	-0.237911	0.220608	-0.173786	0.0342797	-0.0275405	4.65783	2.46007	0.0198565	0.418911	0.111933	0.0178533	0.514726	8.43699e-05	0.000101249	0.105726	0.338527	0.748449	0.758621
497	linolenoylcarnitine (C18:3)*	434	TRUE	0.532859	-0.141959	0.227143	0.610551	0.0255431	-0.0145291	-0.012713	-3.52499	-4.73795	0.114855	0.208761	0.113192	7.79757e-12	0.920387	0.0819845	0.0610614	0.201314	0.0543654	0.751257	0.61617
713	4-allylphenol sulfate	434	TRUE	-0.457912	0.167302	0.244957	0.306588	0.00924738	0.0204544	-0.0187437	-1.20787	4.94285	0.211392	0.171832	0.115123	0.00152967	0.973377	0.023918	0.0108617	0.686322	0.0641342	0.75846	0.565738
697	phosphate	434	TRUE	0.352188	-0.236481	0.23267	-0.0772167	0.276342	0.00657501	-0.0235633	2.73608	-0.314769	0.31487	0.0434424	0.117623	0.40397	0.297034	0.447797	0.000813504	0.338795	0.901894	0.769274	0.316459
653	1-linolenoyl-GPE (18:3)*	434	TRUE	-0.187427	0.12159	-0.243575	-0.130449	0.464792	0.0092372	-0.00335187	8.19616	-1.82277	0.612924	0.326053	0.121272	0.182356	0.0971209	0.313121	0.652363	0.00672321	0.499565	0.78448	0.69839
217	succinate	434	TRUE	0.273923	-0.114321	0.226185	-0.0249177	-0.209304	-0.0109334	0.00304943	2.41685	2.34634	0.426798	0.320977	0.121992	0.784254	0.422005	0.19941	0.65958	0.390357	0.35024	0.78448	0.695766
707	2-ketocaprylate	434	TRUE	0.42528	0.0354379	-0.219039	0.188685	0.0435974	0.00446083	-0.0236353	1.72021	0.491717	0.204867	0.751905	0.12383	0.0331463	0.863545	0.590583	0.000451045	0.529851	0.840574	0.78448	0.929496
638	sphingomyelin (d18:1/21:0, d17:1/22:0, d16:1/23:0)*	434	TRUE	-1.68389	0.0497406	0.234543	-0.120147	-0.493746	0.0379343	0.00457085	6.43859	1.19889	2.79434e-06	0.678763	0.124042	0.205474	0.0692656	1.95312e-05	0.526563	0.0281816	0.64711	0.78448	0.89437
808	gamma-glutamylthreonine	434	TRUE	-0.21219	0.235739	-0.255311	0.329629	0.121174	-0.00541121	0.00376458	1.38885	2.66654	0.588721	0.0722537	0.125224	0.00146725	0.683054	0.576962	0.632912	0.664615	0.351113	0.78448	0.395264
255	leucine	434	TRUE	-1.45922	-0.105889	0.206391	1.13379	0.019676	-0.000643353	0.036149	-8.7621	-2.26198	4.47893e-06	0.319147	0.126196	1.55776e-41	0.934804	0.934781	1.52307e-08	0.00073854	0.329097	0.78448	0.695766
819	X - 13431	434	TRUE	-0.241007	0.0763163	0.216705	0.41936	-0.285124	0.0181818	-0.0235919	11.3611	2.7236	0.470921	0.494499	0.126556	2.02169e-06	0.259361	0.0277742	0.00044129	3.13171e-05	0.26352	0.78448	0.792614
892	3-hydroxyhexanoate	434	TRUE	-0.0165562	0.027385	0.240008	0.158172	-0.208303	-0.00130101	-0.00458576	-7.47029	-0.389265	0.964421	0.825262	0.12752	0.106536	0.458014	0.887232	0.538437	0.0136756	0.885562	0.78448	0.953114
120	X - 23314	434	TRUE	-0.297608	0.109513	-0.230991	0.210659	-0.16926	0.0188939	-0.0206614	2.07708	5.97448	0.405235	0.359416	0.127895	0.0256651	0.531349	0.0325423	0.00401358	0.476694	0.0218534	0.78448	0.719713
775	1-linoleoyl-GPC (18:2)	434	TRUE	1.17648	0.0822515	-0.204201	0.460157	-0.382417	0.00782606	-0.057244	3.49882	-2.93276	0.000217241	0.43913	0.130351	4.30129e-08	0.111938	0.319632	3.26687e-19	0.177874	0.205847	0.78448	0.766979
608	sulfate of piperine metabolite C16H19NO3 (3)*	434	TRUE	-0.569079	-0.189456	-0.233975	0.248989	0.0628602	0.00740399	0.0131766	-1.48789	-4.63935	0.119621	0.121027	0.13154	0.00990945	0.820166	0.412675	0.0727638	0.618125	0.0816522	0.78448	0.500507
777	undecenoylcarnitine (C11:1)	434	TRUE	-0.305372	0.00656259	0.225193	0.584139	0.0766791	0.0127917	-0.0169155	0.384053	2.46738	0.386059	0.955548	0.131958	3.3968e-10	0.773494	0.141861	0.0168171	0.89376	0.336506	0.78448	0.98751
531	N-acetylglycine	434	TRUE	0.789695	0.0339033	-0.206867	-0.0752369	-0.261868	0.0170042	-0.0520266	1.62815	0.835664	0.0152002	0.75514	0.133953	0.381067	0.287109	0.034454	1.67533e-15	0.539774	0.724444	0.78448	0.929496
464	1,2-dilinoleoyl-GPC (18:2/18:2)	434	TRUE	0.982011	0.172576	-0.207689	-0.155494	-0.342442	0.00990448	-0.0417283	3.48597	-4.11602	0.00265553	0.114047	0.134183	0.0715337	0.165845	0.220139	2.04453e-10	0.191272	0.0839074	0.78448	0.483238
387	1-(1-enyl-palmitoyl)-2-linoleoyl-GPC (P-16:0/18:2)*	434	TRUE	1.87531	0.174546	-0.208795	-0.0353455	-0.899951	-0.00977453	-0.0512147	-6.86677	4.69465	1.23e-08	0.11267	0.135052	0.684334	0.000301177	0.229756	9.57579e-15	0.0106218	0.0503903	0.78448	0.483028
181	1-oleoyl-2-dihomo-linoleoyl-GPC (18:1/20:2)*	434	TRUE	2.06397	-0.0562064	-0.246353	-0.507142	0.0625438	-0.0216098	-0.0359074	7.59753	-3.84306	1.10097e-07	0.665273	0.135316	7.78643e-07	0.831527	0.0245221	4.24475e-06	0.0166562	0.174908	0.78448	0.886134
319	N-stearoyl-sphinganine (d18:0/18:0)*	434	TRUE	-2.58766	0.239615	0.217941	0.140537	0.190519	0.0196838	0.0604063	-3.90908	-4.21875	5.62646e-14	0.0372734	0.13571	0.122091	0.464293	0.0207161	2.40174e-18	0.164208	0.092635	0.78448	0.300873
563	xanthine	434	TRUE	-1.23772	0.143887	0.219722	0.470632	0.505814	-0.00989059	0.0446061	-10.6819	0.776152	0.000368041	0.215304	0.136162	2.90426e-07	0.0542428	0.249513	1.6398e-10	0.000165858	0.759205	0.78448	0.620297
400	myristate (14:0)	434	TRUE	-0.00139814	-0.275187	0.222283	-0.505572	0.306095	0.00225295	0.000939711	-0.157685	0.752744	0.996832	0.0193462	0.136787	5.38187e-08	0.250309	0.795736	0.89428	0.956246	0.769226	0.78448	0.26668
521	3-hydroxymyristate	434	TRUE	0.552403	-0.276373	0.240218	-0.176124	0.159543	-0.00717477	-0.00942936	-5.80305	2.52381	0.147251	0.0300228	0.137459	0.0801097	0.579912	0.446331	0.218022	0.0621544	0.363523	0.78448	0.300873
829	hexanoylglutamine	434	TRUE	-0.88943	0.0986708	-0.222504	0.098862	-0.290611	0.00628773	0.0155294	-10.1648	-3.00972	0.0121916	0.405358	0.139465	0.29135	0.278817	0.473454	0.0293259	0.000449204	0.244442	0.790888	0.754456
288	tridecenedioate (C13:1-DC)*	434	TRUE	-0.87705	-0.0572453	0.239217	0.288464	0.123832	0.0179847	0.00321417	1.51624	-1.99838	0.0226156	0.656111	0.142784	0.00451284	0.670357	0.0585781	0.6774	0.629199	0.475926	0.792163	0.883103
115	1-(1-enyl-palmitoyl)-2-arachidonoyl-GPC (P-16:0/20:4)*	434	TRUE	0.338649	-0.0887866	-0.233624	0.585182	-0.438241	-0.00411561	-0.0109467	-4.31871	8.32832	0.367495	0.479562	0.142876	3.6877e-09	0.123046	0.657712	0.146938	0.159157	0.00235536	0.792163	0.780835
27	5alpha-androstan-3beta,17beta-diol disulfate	434	TRUE	-0.724444	0.0689129	-0.180108	0.975265	-0.093477	0.00267429	0.0113928	-4.62672	-5.95283	0.0124289	0.476743	0.143021	3.32789e-37	0.669731	0.708912	0.050304	0.0504892	0.00482099	0.792163	0.780835
482	gamma-glutamylglutamine	434	TRUE	1.18142	0.0404944	0.228672	0.232034	-0.296644	-0.0121984	-0.0351935	3.88562	-1.2647	0.00135445	0.742425	0.143846	0.0171553	0.287385	0.180754	2.00837e-06	0.196694	0.637853	0.792163	0.928248
263	N-oleoyltaurine	434	TRUE	-0.0455127	-0.106606	0.23778	-0.250941	0.448228	0.00745003	-0.0124331	2.33456	0.906537	0.905568	0.405692	0.14411	0.0132417	0.122366	0.432099	0.106615	0.455988	0.74574	0.792163	0.754456
492	N,N,N-trimethyl-5-aminovalerate	434	TRUE	-0.799185	0.167357	0.206778	0.17338	0.438341	0.00479575	0.00888687	1.81318	-2.0931	0.0171067	0.135138	0.145964	0.0501002	0.0837426	0.562685	0.186772	0.507503	0.391457	0.796757	0.5054
696	homostachydrine*	434	TRUE	0.0403855	-0.0751781	0.230188	0.101332	-0.00642209	0.00106541	-0.00418675	-2.99703	4.66253	0.913969	0.547315	0.146724	0.3046	0.981876	0.908206	0.57708	0.326015	0.0869696	0.796757	0.820058
780	pyridoxal	434	TRUE	-0.209025	0.0482987	-0.226299	0.207913	-0.16842	-0.00506127	0.006453	-1.97097	4.42416	0.572888	0.696658	0.150283	0.0336777	0.548032	0.580747	0.386133	0.514862	0.101507	0.811168	0.907276
655	branched-chain, straight-chain, or cyclopropyl 10:1 fatty acid (1)*	434	TRUE	1.15979	0.0458193	-0.220244	-0.559611	-0.00551919	-0.0028722	-0.0293765	6.47697	2.42507	0.00146215	0.706782	0.154412	6.06561e-09	0.984024	0.749872	5.99109e-05	0.0294776	0.361207	0.813883	0.914393
49	X - 12026	434	TRUE	-1.76967	0.0274495	0.206627	0.201135	-0.0379705	0.0111722	0.0346143	9.60564	0.529545	2.30805e-07	0.810261	0.154631	0.0259766	0.883321	0.186461	4.71236e-07	0.000582556	0.831789	0.813883	0.953114
666	1-stearoyl-2-docosahexaenoyl-GPE (18:0/22:6)*	434	TRUE	-1.71321	0.140077	0.223852	-0.367302	0.665898	0.0406408	0.00571105	-8.15818	-1.70064	3.80452e-06	0.258143	0.154675	0.000174919	0.0175266	9.1857e-06	0.443005	0.00701331	0.528962	0.813883	0.663009
852	1-margaroyl-GPE (17:0)*	434	TRUE	0.0627547	-0.0337538	0.223614	0.225586	0.122347	0.0157653	-0.0310963	2.83644	-0.633256	0.865471	0.785105	0.154826	0.0210864	0.662289	0.0851031	2.91645e-05	0.348206	0.814519	0.813883	0.946775
658	X - 22771	434	TRUE	0.693698	0.129429	0.223729	0.527283	0.349844	-0.0157555	-0.0172507	3.61415	-3.84867	0.061556	0.296598	0.155328	7.37778e-08	0.2125	0.0858384	0.0206246	0.232786	0.154638	0.813883	0.692061
423	X - 11308	434	TRUE	0.486142	-0.354516	-0.198581	0.738888	-0.106637	-0.0279075	0.01872	-9.10489	-5.31731	0.141421	0.00133231	0.156879	2.56761e-17	0.669714	0.000637439	0.0048102	0.000740852	0.0272985	0.817228	0.079583
559	methionine	434	TRUE	0.253476	-0.0253687	0.215306	0.705832	-0.220194	-0.0134668	-0.0025851	-8.20661	6.47727	0.48548	0.834528	0.162621	1.89423e-13	0.422988	0.133818	0.723189	0.00566477	0.0144452	0.836784	0.954965
137	adenine	434	TRUE	-0.36343	0.0257484	0.209851	0.136145	0.175067	-0.00434795	0.00879969	-0.323894	2.22055	0.305636	0.828066	0.163302	0.146111	0.514054	0.620021	0.216818	0.910945	0.390372	0.836784	0.953114
237	N-acetylglutamate	434	TRUE	-0.945197	0.0307804	-0.203367	-0.308232	0.176363	0.00697349	0.023047	-3.71441	1.6293	0.00611831	0.789362	0.164509	0.000709958	0.498794	0.413223	0.000873978	0.186912	0.516678	0.836784	0.949529
225	oleate/vaccenate (18:1)	434	TRUE	-0.0745651	-0.231293	0.210289	-0.283603	0.311377	-0.0012118	0.00348145	-5.94918	-0.927221	0.834342	0.0522331	0.164526	0.00259092	0.248155	0.890635	0.626832	0.0409394	0.721182	0.836784	0.341612
154	bilirubin (E,E)*	434	TRUE	0.114236	-0.132758	0.228933	0.44565	-0.160727	0.0190989	-0.0363365	0.414604	-2.66496	0.769377	0.307926	0.166138	1.47915e-05	0.585424	0.0473604	3.42619e-06	0.896282	0.347934	0.836784	0.695477
216	4-hydroxyphenylacetylglutamine	434	TRUE	-1.94062	0.266138	-0.194011	0.329797	0.0549188	0.0252888	0.0209352	-3.72745	-6.8155	4.55257e-09	0.0161312	0.167179	0.000161038	0.826343	0.00199622	0.00163752	0.167729	0.00471983	0.836784	0.253571
507	myristoleate (14:1n5)	434	TRUE	0.643233	-0.187402	0.205014	-0.741771	0.0532464	-0.0112929	0.000402429	0.330373	-0.162708	0.0662915	0.109368	0.167759	1.0524e-15	0.840681	0.192108	0.95438	0.908008	0.949171	0.836784	0.475699
882	5-acetylamino-6-amino-3-methyluracil	434	TRUE	-0.707937	0.213272	-0.219931	0.0948941	-0.320041	0.0191622	-0.00672345	8.76081	-0.877482	0.0598562	0.0898006	0.168265	0.339408	0.260603	0.0393296	0.373525	0.00433131	0.748898	0.836784	0.426107
240	X - 21796	434	TRUE	-0.0241363	-0.046912	0.20188	0.753675	-0.290558	0.00966482	-0.0249708	-0.336476	-4.17564	0.944806	0.687207	0.172356	2.6739e-16	0.270439	0.262074	0.000362143	0.905882	0.100261	0.836784	0.899354
797	indolepropionate	434	TRUE	1.91802	-0.191664	0.227711	-0.144165	0.300074	-0.0147069	-0.0466183	9.99648	-0.0994261	1.10753e-06	0.145201	0.172875	0.16552	0.313543	0.130745	3.73585e-09	0.00186824	0.972355	0.836784	0.51922
649	maltose	434	TRUE	-0.52716	-0.19114	0.216255	0.0408361	0.17371	-0.00687009	0.0257278	-1.58025	0.516931	0.15925	0.126704	0.173559	0.679637	0.539648	0.458008	0.000625014	0.60521	0.849767	0.836784	0.505001
100	N-acetylhistidine	434	TRUE	-0.33904	0.354155	-0.204883	0.268667	-0.0546234	0.0215886	-0.0312209	8.39026	6.01039	0.339722	0.00284283	0.173929	0.00416667	0.838824	0.0139168	1.20068e-05	0.00379863	0.0202011	0.836784	0.100885
299	3-bromo-5-chloro-2,6-dihydroxybenzoic acid*	434	TRUE	-0.894816	-0.0680699	0.222221	0.694093	0.0479594	-0.00614766	0.0240426	-1.63589	-2.7629	0.0208304	0.598837	0.176185	1.1276e-11	0.869895	0.520651	0.00198957	0.604741	0.327464	0.836784	0.846652
86	X - 24522	434	TRUE	-1.61923	0.0862615	0.202949	0.462733	0.341868	0.0282552	0.00434283	6.91672	-0.973552	4.74443e-06	0.46573	0.176498	7.33062e-07	0.201427	0.00123673	0.541159	0.0166416	0.705772	0.836784	0.775513
282	cyclo(pro-val)	434	TRUE	-0.677813	0.110097	-0.196495	0.186603	-0.216227	0.00429206	0.0153612	7.39783	-1.31042	0.0481295	0.336781	0.176963	0.0393511	0.404483	0.612673	0.0257478	0.00823298	0.600067	0.836784	0.706687
583	trimethylamine N-oxide	434	TRUE	-0.150502	0.02245	-0.208129	0.186778	0.184642	0.00234707	-0.00981908	10.5899	-0.92589	0.679423	0.853652	0.178037	0.0520983	0.502593	0.794307	0.179453	0.0003677	0.727179	0.836784	0.962104
442	sphingomyelin (d18:2/23:0, d18:1/23:1, d17:1/24:1)*	434	TRUE	-1.10462	0.0887502	0.200552	-0.141519	-0.63745	0.0313897	-0.00743503	1.96511	2.09469	0.00165493	0.449421	0.178257	0.126887	0.0163624	0.000298275	0.291716	0.492933	0.412962	0.836784	0.771421
467	3-methylhistidine	434	TRUE	-0.883625	0.229102	-0.212218	0.470212	-0.468279	0.00807316	0.0110298	7.18995	1.06822	0.0177438	0.065845	0.179607	1.76827e-06	0.0966155	0.380843	0.140597	0.0181082	0.694076	0.836784	0.381313
766	1-palmitoyl-2-eicosapentaenoyl-GPC (16:0/20:5)*	434	TRUE	-1.07235	0.180878	-0.202763	0.111086	-0.140557	0.037624	-0.0190614	4.10233	5.97501	0.00261127	0.128677	0.1798	0.237618	0.601857	1.9315e-05	0.00771795	0.158324	0.0213558	0.836784	0.5054
247	1-margaroyl-2-docosahexaenoyl-GPC (17:0/22:6)*	434	TRUE	0.524061	-0.0663915	0.193554	-0.0175068	-0.265682	0.0192451	-0.0492532	-8.88465	1.83512	0.123669	0.559465	0.180225	0.845565	0.302028	0.0221809	5.82715e-13	0.00138607	0.459411	0.836784	0.827579
385	N-acetyl-2-aminooctanoate*	434	TRUE	0.0306625	0.184738	-0.184522	0.567859	0.342048	0.00654108	-0.0250786	9.58811	8.86279	0.924725	0.0884896	0.180245	3.42638e-11	0.163398	0.414833	0.00011921	0.000295218	0.00017846	0.836784	0.423993
739	sphingomyelin (d18:1/17:0, d17:1/18:0, d19:1/16:0)	434	TRUE	-1.34103	0.092976	0.213017	0.249953	-0.685115	0.0245121	0.00713129	-4.48425	3.78602	0.000368721	0.459971	0.182444	0.0119344	0.0161267	0.00844739	0.345675	0.144573	0.16764	0.838341	0.774427
533	1-(1-enyl-oleoyl)-2-docosahexaenoyl-GPE (P-18:1/22:6)*	434	TRUE	0.686491	0.183999	-0.203688	0.203949	-0.168193	0.013667	-0.0504974	-11.759	5.87582	0.0571469	0.1271	0.183477	0.0323345	0.537718	0.125509	3.23977e-12	6.56187e-05	0.0254663	0.838341	0.505001
254	palmitoyl-linoleoyl-glycerol (16:0/18:2) [2]*	434	TRUE	-1.78361	-0.110945	0.190675	0.291746	0.512958	0.0171602	0.0387008	-0.248797	-4.93316	1.35615e-07	0.32653	0.184172	0.00109322	0.0450062	0.0402029	1.23545e-08	0.928227	0.0454293	0.838341	0.69839
401	sphingomyelin (d18:1/19:0, d19:1/18:0)*	434	TRUE	-2.00672	0.122529	0.20987	-0.0423514	-0.51192	0.0373143	0.0177534	-0.246502	3.56989	7.63599e-08	0.326011	0.185193	0.667441	0.0697789	5.25857e-05	0.0178874	0.935526	0.189416	0.838341	0.69839
641	7-alpha-hydroxy-3-oxo-4-cholestenoate (7-Hoca)	434	TRUE	-1.18953	-0.00126362	0.209725	0.545872	-0.0611765	0.011099	0.0166859	-3.09177	-1.80284	0.00143163	0.991914	0.185258	3.00756e-08	0.828349	0.228793	0.0259631	0.310024	0.507271	0.838341	0.997683
577	1-oleoyl-GPE (18:1)	434	TRUE	0.0797707	0.224188	-0.209378	0.105329	0.321641	0.0243532	-0.0358281	5.50787	0.95642	0.831061	0.0727886	0.18694	0.28604	0.255337	0.00841547	1.83325e-06	0.0711407	0.725577	0.839106	0.395264
232	adenosine 5'-monophosphate (AMP)	434	TRUE	-0.187618	-0.101517	0.190676	-0.0458855	0.230047	-0.00919389	0.019358	-0.797648	-0.661202	0.581952	0.372722	0.1873	0.6101	0.372056	0.275088	0.00467967	0.774314	0.790046	0.839106	0.731366
876	3-methyl catechol sulfate (1)	434	TRUE	-0.322613	0.0362276	0.186466	0.394359	0.430316	0.00438573	-0.00664735	12.2121	-2.74301	0.334581	0.745755	0.188717	7.92669e-06	0.088767	0.595636	0.322196	7.65106e-06	0.260222	0.839881	0.928248
418	1-palmityl-2-linoleoyl-GPC (O-16:0/18:2)*	434	TRUE	1.2895	0.287098	-0.187302	0.082467	-0.875124	-0.00905585	-0.0326151	-3.73783	-0.492809	0.00013469	0.0109754	0.191256	0.355136	0.000612404	0.278073	1.52532e-06	0.175195	0.841309	0.839881	0.228696
67	glycocholate	434	TRUE	-0.0612767	0.0148504	0.193821	0.0697855	0.108813	-0.00597397	0.0102502	-14.6457	-1.25718	0.860988	0.898944	0.19176	0.450066	0.680925	0.489768	0.144692	2.93651e-07	0.62199	0.839881	0.974473
245	pantothenate	434	TRUE	-0.907053	0.215613	0.181378	0.313058	-0.0607191	0.0192277	-0.00790425	2.95094	-2.89725	0.00575834	0.0495196	0.19317	0.000307044	0.806905	0.0178852	0.230887	0.271111	0.226154	0.839881	0.341305
378	taurocholenate sulfate*	434	TRUE	0.803517	-0.224222	0.213835	0.159098	-0.168516	-0.0168253	-0.00459568	4.5315	5.79024	0.038289	0.083637	0.19382	0.120286	0.565596	0.079252	0.555196	0.15233	0.0404883	0.839881	0.412407
792	myristoylcarnitine (C14)	434	TRUE	-0.703462	-0.00884383	0.205531	0.476616	-0.223148	0.017377	-0.0118858	-2.20233	1.89377	0.0596276	0.943511	0.19465	1.344e-06	0.429483	0.0597937	0.113062	0.470048	0.486531	0.839881	0.983795
186	serine	434	TRUE	1.88936	0.00797884	0.200528	-0.156718	-0.0379749	-0.0196953	-0.0424854	-6.91588	0.491384	2.20706e-07	0.947798	0.194999	0.103613	0.890477	0.028892	6.59788e-09	0.0201623	0.853298	0.839881	0.984041
262	alpha-hydroxyisocaproate	434	TRUE	-0.476423	-0.0337547	0.171062	1.10283	-0.170767	-0.00829822	0.0174529	-7.42931	0.761659	0.126419	0.745914	0.195906	6.12346e-41	0.468813	0.281492	0.00530709	0.00350293	0.737392	0.839881	0.928248
703	1-palmitoyl-GPG (16:0)*	434	TRUE	-0.76619	0.0382859	-0.191	0.214845	0.664076	0.0117459	0.00868208	5.30618	0.930849	0.0277105	0.742033	0.19591	0.0193979	0.0116361	0.172162	0.214225	0.0618087	0.71361	0.839881	0.928248
699	3-hydroxylaurate	434	TRUE	0.701426	-0.237692	0.213176	-0.202418	0.0798639	-0.00662635	-0.0158294	-7.70384	4.20253	0.0733119	0.06937	0.199589	0.05031	0.787439	0.493691	0.0441827	0.0159676	0.140897	0.843413	0.390915
209	hydroquinone sulfate	434	TRUE	0.203068	-0.101813	0.200231	0.166132	0.377849	-0.0126865	0.00577965	5.1113	-3.82758	0.580964	0.407597	0.199604	0.0872202	0.174424	0.162989	0.43408	0.0887462	0.153366	0.843413	0.754456
41	1-linolenoyl-GPC (18:3)*	434	TRUE	0.446573	0.104003	-0.190968	0.147964	0.200333	0.00813502	-0.0296634	10.8703	-0.0477591	0.203475	0.375478	0.199968	0.110533	0.450617	0.348649	2.59898e-05	0.000149269	0.985109	0.843413	0.731366
326	X - 18913	434	TRUE	0.79739	-0.158471	-0.198838	0.398519	-0.0152389	-0.0205491	-0.00339784	-1.50857	-1.67891	0.0293843	0.195174	0.200499	3.73862e-05	0.9561	0.0231462	0.643959	0.613656	0.529094	0.843413	0.594816
91	palmitoyl-linoleoyl-glycerol (16:0/18:2) [1]*	434	TRUE	-1.32777	0.0432826	0.188825	0.425048	0.351729	0.00612357	0.0358104	-3.66001	-4.59238	0.000149574	0.711479	0.203789	4.2842e-06	0.184105	0.479276	3.54444e-07	0.200386	0.0719058	0.853247	0.916617
486	X - 23678	434	TRUE	-0.400074	0.0336795	0.19407	0.0211689	-0.0810269	0.012886	-0.0084395	-4.01131	0.892059	0.270502	0.781335	0.207772	0.825236	0.767913	0.151047	0.247117	0.175901	0.735991	0.861658	0.943499
72	isovalerylcarnitine (C5)	434	TRUE	-1.31229	0.103689	0.171019	0.941064	0.169825	-0.00194281	0.0324978	-3.55317	2.94009	4.31289e-05	0.333517	0.209048	1.14413e-28	0.48398	0.80648	4.57776e-07	0.174883	0.208574	0.861658	0.704573
277	X - 24748	434	TRUE	0.937607	0.0117006	0.186214	0.134945	-0.0127769	-0.0115083	-0.0205141	-5.38556	0.965001	0.00730167	0.920201	0.209228	0.143652	0.961443	0.182808	0.00347137	0.0590535	0.704755	0.861658	0.979216
37	palmitoleoylcarnitine (C16:1)*	434	TRUE	-0.438095	0.00720873	0.192486	0.172067	-0.163522	0.0118293	-0.0117872	-4.13446	-0.590699	0.225679	0.95243	0.209644	0.071514	0.549843	0.185675	0.104569	0.16129	0.82262	0.861658	0.986563
138	ethylmalonate	434	TRUE	-0.756305	0.0695868	0.193633	0.0863021	0.0273706	0.0138469	0.00269767	10.1548	-3.79821	0.0385685	0.568961	0.211938	0.371296	0.921137	0.125444	0.71331	0.000666773	0.153945	0.862861	0.827579
723	1-linoleoyl-GPE (18:2)*	434	TRUE	0.164205	0.184699	-0.190402	0.0289827	0.0753176	0.0131344	-0.0226564	1.57506	-6.03741	0.648295	0.124717	0.212591	0.760437	0.782043	0.139937	0.0017266	0.591961	0.0213667	0.862861	0.504402
633	phenylpyruvate	434	TRUE	-0.304723	-0.0164832	0.173346	0.623204	0.306657	0.00190553	0.00361171	-0.462776	-3.08139	0.35275	0.880437	0.212826	6.12538e-13	0.216232	0.81414	0.583413	0.862738	0.197217	0.862861	0.974473
339	X - 17335	434	TRUE	-0.373723	-0.209243	0.194742	0.0530949	-0.119846	0.0148732	-0.00949905	-2.96285	3.25582	0.31139	0.0898819	0.213802	0.585973	0.667727	0.103132	0.200143	0.325515	0.226188	0.862913	0.426107
223	stearate (18:0)	434	TRUE	-0.485563	-0.246467	0.187352	-0.0225843	0.296533	0.00536616	0.0061955	-5.94513	-1.38102	0.175186	0.0394735	0.217648	0.81125	0.273595	0.544421	0.38907	0.041999	0.596706	0.872059	0.304898
180	X - 15461	434	TRUE	-1.33935	0.027444	0.183916	0.359003	-0.173248	0.00499772	0.0237116	-8.54581	-0.725578	0.000141206	0.815475	0.218057	0.000111678	0.515036	0.56559	0.000793614	0.00292933	0.777215	0.872059	0.953114
336	p-cresol sulfate	434	TRUE	0.766525	0.0259196	0.202283	-0.0346968	0.222862	-0.00210014	-0.0319011	17.7134	-1.14378	0.0481022	0.841489	0.218988	0.73474	0.44733	0.826591	4.21004e-05	2.20187e-08	0.685686	0.872059	0.956008
789	ceramide (d18:2/24:1, d18:1/24:2)*	434	TRUE	-1.1568	0.156342	-0.195474	0.182673	0.243216	0.0212294	0.00626728	-4.38027	-3.49082	0.00208297	0.213182	0.220266	0.0656368	0.392116	0.0222932	0.40634	0.153326	0.20242	0.873268	0.618158
867	X - 24307	434	TRUE	0.784188	-0.35459	0.19826	0.0068134	0.104469	-0.0259366	0.00373591	-7.3699	-0.105138	0.0403433	0.0055354	0.221866	0.946213	0.717973	0.00608225	0.626734	0.0182506	0.96991	0.875734	0.169777
346	1-pentadecanoyl-2-arachidonoyl-GPC (15:0/20:4)*	434	TRUE	-1.25515	-0.186465	0.186202	-0.0202038	0.0630607	0.0238248	0.0166654	7.62566	5.223	0.000490347	0.121217	0.222931	0.831706	0.816852	0.00742951	0.0211878	0.00947047	0.046519	0.87608	0.500507
161	5-methylthioadenosine (MTA)	434	TRUE	-1.22892	0.0871997	-0.174699	-0.0717285	-0.121561	0.0110919	0.0236404	11.143	-2.25131	0.000292665	0.441899	0.224994	0.423372	0.635696	0.186019	0.000522508	5.74531e-05	0.362569	0.877986	0.767328
163	X - 11787	434	TRUE	-0.14529	0.169668	0.18915	0.744801	-0.487016	-0.00302667	-0.00891835	-0.823232	-2.86086	0.69274	0.167339	0.225376	1.6996e-14	0.0798654	0.739124	0.227169	0.783867	0.285645	0.877986	0.563975
613	(2 or 3)-decenoate (10:1n7 or n8)	434	TRUE	1.26565	-0.225344	0.193705	-0.0949614	0.0451173	-0.0189805	-0.0203543	-12.0554	-0.90721	0.000894163	0.0767546	0.230849	0.345202	0.87557	0.0438635	0.00781422	0.000106072	0.743852	0.893213	0.404054
584	1-arachidonoyl-GPC (20:4n6)*	434	TRUE	0.0467707	-0.0849181	-0.181748	0.645168	0.0588533	0.0150625	-0.031781	4.94082	6.20084	0.896811	0.48105	0.234944	1.24082e-11	0.829145	0.0910832	1.14454e-05	0.093269	0.0182964	0.893213	0.780835
296	hypoxanthine	434	TRUE	-0.593366	0.063352	0.198293	-0.0102566	0.0468006	0.00264276	0.0178885	-3.67646	-0.385756	0.133058	0.631284	0.236783	0.921664	0.875505	0.786649	0.0241421	0.2542	0.893391	0.893213	0.864879
188	5-dodecenoate (12:1n7)	434	TRUE	1.13187	-0.160783	0.181851	-0.611244	-0.0660078	-0.0162822	-0.0115086	-2.69699	1.42605	0.00179323	0.184417	0.237085	1.69999e-10	0.809716	0.0691876	0.11392	0.362044	0.58929	0.893213	0.580152
63	sphingomyelin (d18:1/25:0, d19:0/24:1, d20:1/23:0, d19:1/24:0)*	434	TRUE	-1.08183	0.0368065	0.179375	0.440324	-0.406907	0.0231082	0.00233648	3.70866	-0.861629	0.00273637	0.760362	0.241729	3.87225e-06	0.136206	0.00962834	0.747325	0.208323	0.743334	0.893213	0.931092
59	1-margaroyl-GPC (17:0)	434	TRUE	0.146433	0.0463376	0.170543	0.403907	-0.0202544	0.0282351	-0.0513572	3.93719	-0.277408	0.670023	0.686584	0.242168	8.53124e-06	0.937877	0.000887377	9.97664e-14	0.160444	0.911792	0.893213	0.899354
60	stearoyl sphingomyelin (d18:1/18:0)	434	TRUE	-1.58825	0.166978	0.179893	0.277441	-0.83164	0.00838959	0.037596	-7.43119	3.36632	1.23136e-05	0.169004	0.2432	0.00382358	0.00246863	0.350157	2.56485e-07	0.0122114	0.203508	0.893213	0.565738
124	thyroxine	434	TRUE	-0.460194	-0.180362	0.185142	-0.394185	-0.0711243	-0.00310745	0.0286343	-3.42184	-5.35727	0.218727	0.149179	0.243559	6.6101e-05	0.801535	0.736881	0.000138718	0.262561	0.0494335	0.893213	0.526238
413	eicosenedioate (C20:1-DC)*	434	TRUE	1.26781	-0.272213	-0.166561	0.377097	-0.246623	-0.0323721	0.00194499	-6.06093	-0.811932	0.00016575	0.0155304	0.243579	2.20993e-05	0.332654	0.000100055	0.773586	0.0274039	0.740652	0.893213	0.248487
203	5-acetylamino-6-formylamino-3-methyluracil	434	TRUE	-0.684077	0.245021	-0.18236	0.0734075	0.00372268	0.0169313	-0.0036451	-0.27843	-3.58514	0.0642011	0.0472921	0.244929	0.451948	0.989374	0.0638527	0.623401	0.926472	0.183164	0.893213	0.332969
267	1-pentadecanoyl-2-linoleoyl-GPC (15:0/18:2)*	434	TRUE	-0.762157	0.103716	0.179843	-0.400186	-0.588203	0.027939	-0.000149948	3.58196	-6.39602	0.0366198	0.394735	0.245132	3.23737e-05	0.0329338	0.00193854	0.983666	0.228853	0.0160897	0.893213	0.744623
609	picolinate	434	TRUE	1.05511	-0.0195078	0.164957	0.618797	0.207847	-0.0130222	-0.0287968	-1.71786	9.92292	0.00164072	0.861711	0.246011	2.68311e-12	0.412122	0.115927	1.8799e-05	0.53	4.83432e-05	0.893213	0.966405
873	piperine	434	TRUE	-0.439793	-0.188875	-0.186629	0.0460172	0.168522	0.00498809	0.0140072	-0.514187	-2.54601	0.247016	0.136833	0.246972	0.646421	0.557491	0.595298	0.0663861	0.868309	0.35775	0.893213	0.5054
160	lithocholate sulfate (1)	434	TRUE	-0.127463	-0.0304638	-0.182687	-0.0952657	0.080026	0.00269226	0.00241256	5.6468	-1.05976	0.731925	0.806458	0.247223	0.33221	0.7761	0.769732	0.746813	0.0629983	0.695904	0.893213	0.953114
887	X - 12544	434	TRUE	0.00696726	0.118301	0.182175	-0.0575316	0.255358	0.00108395	-0.00359717	3.169	2.75869	0.985029	0.340378	0.247554	0.55732	0.363122	0.905984	0.629534	0.29575	0.307921	0.893213	0.711589
868	dopamine 3-O-sulfate	434	TRUE	0.189985	0.174101	-0.17139	0.00818535	0.0607299	0.00992284	-0.0264978	4.86769	6.28982	0.58689	0.136232	0.248011	0.929353	0.818348	0.250929	0.000161092	0.0881068	0.0135656	0.893213	0.5054
164	N-acetylputrescine	434	TRUE	0.270234	0.191028	-0.169308	-0.248767	0.294009	-0.00953622	1.73066e-05	-1.79011	3.34506	0.43592	0.0993451	0.249987	0.00660212	0.26234	0.266019	0.998018	0.527217	0.185689	0.893213	0.449562
135	X - 13553	434	TRUE	-1.06627	-0.0621318	-0.165083	0.383127	-0.212527	0.0206564	-0.00904373	-11.025	6.9363	0.00164232	0.583036	0.250669	1.83358e-05	0.406661	0.0136089	0.183664	6.66512e-05	0.00494676	0.893213	0.838524
360	1-stearoyl-2-arachidonoyl-GPE (18:0/20:4)	434	TRUE	-1.48657	0.0796609	0.175724	-0.179634	0.698165	0.0371053	0.00646329	-3.6411	0.396248	3.98882e-05	0.510057	0.252435	0.0600997	0.0107325	3.34862e-05	0.373823	0.217693	0.880552	0.893213	0.801773
152	docosahexaenoate (DHA; 22:6n3)	434	TRUE	0.469319	0.00441217	0.165704	-0.113252	0.0316157	0.0111596	-0.0376105	-6.77142	1.0876	0.169645	0.969181	0.25314	0.209437	0.902632	0.186462	4.25501e-08	0.0152045	0.662297	0.893213	0.994209
481	X - 11261	434	TRUE	-1.12528	0.0217323	-0.158528	0.346627	0.606079	-0.0116846	0.0459635	-7.7592	-4.25184	0.000586101	0.842509	0.253682	6.05126e-05	0.0143419	0.148671	2.70758e-12	0.00368232	0.0746432	0.893213	0.956008
390	dihomo-linoleate (20:2n6)	434	TRUE	-0.0683593	-0.249407	0.17735	-0.252457	0.287287	-0.00779038	0.0140169	-9.28758	-2.4699	0.851989	0.0416474	0.25395	0.00906318	0.299791	0.389666	0.0567901	0.00189941	0.354905	0.893213	0.305869
719	palmitoyl-oleoyl-glycerol (16:0/18:1) [1]*	434	TRUE	-2.3833	0.0156347	0.168664	0.349535	0.418816	0.034763	0.0347309	3.60547	-3.48228	1.00363e-11	0.893716	0.256324	0.000156623	0.113756	5.91518e-05	7.87881e-07	0.207182	0.172362	0.893213	0.974473
596	1-stearyl-2-arachidonoyl-GPC (O-18:0/20:4)*	434	TRUE	-0.0105002	0.067469	0.180028	0.339135	-0.161356	-0.00179616	0.00197288	0.963385	3.26143	0.97759	0.589119	0.256358	0.000590214	0.568127	0.845864	0.792708	0.752202	0.231173	0.893213	0.843212
366	cortisol	434	TRUE	0.600223	0.180117	-0.190829	-0.302316	-0.128928	0.013817	-0.0342391	3.91132	0.734606	0.13028	0.174267	0.25694	0.00390036	0.667378	0.158823	1.72836e-05	0.227107	0.799408	0.893213	0.565738
143	2,3-dihydroxy-2-methylbutyrate	434	TRUE	-0.0909985	0.208765	-0.163304	0.472138	0.401444	0.00324989	-0.0133585	3.40455	2.50502	0.789151	0.0663894	0.258063	1.48308e-07	0.118766	0.699226	0.0506299	0.220327	0.312401	0.893213	0.381313
894	tetradecanedioate (C14-DC)	434	TRUE	0.419505	-0.118639	0.172604	-0.0497645	0.215984	0.00164837	-0.0171894	-1.00722	-4.58097	0.243577	0.323729	0.258172	0.600354	0.42726	0.852941	0.0173558	0.731607	0.0805632	0.893213	0.69839
594	dodecanedioate (C12-DC)	434	TRUE	0.113017	-0.0774061	0.166451	-0.212578	-0.0521734	0.0107775	-0.0195926	6.1937	-2.53373	0.744752	0.504611	0.258461	0.0203828	0.842464	0.209107	0.00495029	0.0288303	0.316525	0.893213	0.800232
865	1-(1-enyl-palmitoyl)-2-palmitoyl-GPC (P-16:0/16:0)*	434	TRUE	1.33196	0.0935851	-0.169475	-0.00361041	-0.94002	-0.00184588	-0.0405967	0.288799	8.04282	0.000168534	0.428965	0.259277	0.969193	0.000446657	0.83295	1.13487e-08	0.920401	0.00182475	0.893213	0.763123
298	threonate	434	TRUE	1.12322	0.0224129	0.164528	-0.0240281	-0.391059	0.0058427	-0.0499878	7.2386	-0.874375	0.00109952	0.845488	0.259881	0.791456	0.132949	0.492194	4.75407e-13	0.00997445	0.72735	0.893213	0.957711
313	salicylate	434	TRUE	0.52718	0.0375861	-0.151182	-0.0133122	0.120238	-0.0020977	-0.0184656	0.482103	7.2773	0.095719	0.722268	0.260188	0.873412	0.61535	0.788556	0.00366619	0.851941	0.00159993	0.893213	0.919469
170	X - 24556	434	TRUE	0.0205314	0.101651	0.163577	0.358329	-0.0473338	0.0112664	-0.0262015	4.83834	-0.268767	0.952801	0.380533	0.266405	9.14005e-05	0.856803	0.188844	0.000169199	0.0874905	0.915321	0.898181	0.734822
271	2-aminophenol sulfate	434	TRUE	1.17648	-0.00938009	0.16853	0.082792	0.415197	-0.0171765	-0.0214926	9.85302	-0.300793	0.00111647	0.938016	0.271171	0.385013	0.128241	0.0542066	0.00302869	0.000825371	0.908954	0.898181	0.983795
391	palmitoyl-docosahexaenoyl-glycerol (16:0/22:6) [1]*	434	TRUE	-1.61417	0.217992	0.170217	0.194461	0.229201	0.0283912	0.0135681	-4.92476	0.40344	9.68678e-06	0.0738024	0.271564	0.0435392	0.406159	0.00164385	0.0640867	0.0982189	0.879393	0.898181	0.39597
681	docosahexaenoylcarnitine (C22:6)*	434	TRUE	-0.00418747	0.131841	0.16119	0.315259	-0.324425	0.0179234	-0.0346278	-8.93358	0.721898	0.990355	0.254756	0.272809	0.000567529	0.215563	0.0363317	6.45071e-07	0.00158131	0.774897	0.898181	0.663009
410	N-acetyl-1-methylhistidine*	434	TRUE	-0.939919	0.111902	-0.152108	0.512966	-0.237275	0.0147902	-0.00164805	9.08729	8.97792	0.00403745	0.305684	0.272825	2.80078e-09	0.337161	0.0671964	0.801801	0.000660496	0.000164034	0.898181	0.695477
730	1-(1-enyl-palmitoyl)-2-oleoyl-GPE (P-16:0/18:1)*	434	TRUE	0.0591768	0.361736	-0.16681	0.142271	0.0627084	0.015177	-0.0238988	-6.90398	6.53126	0.869002	0.00255464	0.273235	0.133177	0.817234	0.0870412	0.000911859	0.0184127	0.0124919	0.898181	0.100885
706	5-dodecenoylcarnitine (C12:1)	434	TRUE	0.408398	-0.140093	0.16699	-0.0311757	0.14058	-0.0108234	-0.00167022	-1.04988	1.53674	0.256626	0.244248	0.274326	0.74294	0.605606	0.223882	0.817315	0.720896	0.558028	0.898181	0.653596
611	dihomo-linoleoylcarnitine (C20:2)*	434	TRUE	0.0368751	-0.0184133	0.154654	0.693687	-0.240054	0.00923318	-0.0279327	-6.97906	-4.42997	0.91202	0.868867	0.274788	3.49122e-15	0.341531	0.263033	3.08156e-05	0.0104118	0.0685239	0.898181	0.969496
307	1-margaroyl-2-linoleoyl-GPC (17:0/18:2)*	434	TRUE	-0.180552	0.282529	0.167044	-0.126023	-0.534268	0.0267987	-0.0301571	-8.23433	-4.23031	0.616589	0.0190538	0.274962	0.185649	0.0500943	0.00264266	3.12727e-05	0.00515133	0.107431	0.898181	0.26668
229	deoxycarnitine	434	TRUE	-0.197136	-0.0628484	-0.143715	1.27001	-0.607521	-0.000220531	-0.0137172	-5.83678	3.1519	0.525423	0.544652	0.275272	3.84231e-54	0.00966117	0.977073	0.027803	0.0212624	0.163542	0.898181	0.819586
453	palmitoleate (16:1n7)	434	TRUE	-0.0497706	-0.17913	0.157635	-0.620266	0.290155	-0.00192432	0.0093299	-0.12228	-2.33821	0.883831	0.115571	0.275429	5.33227e-12	0.259994	0.819219	0.172629	0.964922	0.346192	0.898181	0.486156
259	gamma-glutamylhistidine	434	TRUE	-0.00723317	0.0445196	-0.166642	0.225491	-0.334786	0.00343921	-0.00928244	9.80675	1.35211	0.984059	0.712875	0.277987	0.0183229	0.22137	0.700724	0.201703	0.000904453	0.608267	0.898181	0.916617
233	alanine	434	TRUE	-1.23094	-0.129149	0.164206	0.14462	0.271317	0.00273269	0.0332678	-0.863147	1.30916	0.000583278	0.280235	0.279584	0.125935	0.316139	0.757405	3.68924e-06	0.767654	0.615694	0.898181	0.680313
477	sulfate of piperine metabolite C16H19NO3 (2)*	434	TRUE	-0.737726	-0.182627	-0.168529	0.242912	0.0266038	0.0102803	0.0154684	-1.18306	-4.05151	0.0447399	0.137067	0.279885	0.0123173	0.923751	0.257837	0.0361329	0.693349	0.130371	0.898181	0.5054
257	methionine sulfone	434	TRUE	0.0667199	0.212481	0.159406	0.157683	0.191765	0.0106378	-0.0316149	8.31231	0.263665	0.848015	0.0677908	0.280531	0.0862701	0.466368	0.21638	6.1338e-06	0.0034434	0.917222	0.898181	0.386882
846	glutarylcarnitine (C5-DC)	434	TRUE	0.217092	0.0245275	0.145706	0.783733	-0.283325	-0.00617414	-0.0114272	13.5915	0.676729	0.495268	0.817658	0.280725	1.11984e-20	0.239237	0.432666	0.0738834	1.69086e-07	0.770498	0.898181	0.953114
133	palmitoyl-oleoyl-glycerol (16:0/18:1) [2]*	434	TRUE	-2.21611	0.0630449	0.156063	0.336935	0.57968	0.0261996	0.0390519	1.79223	-3.8569	8.19951e-11	0.580214	0.280917	0.000183288	0.0246256	0.00188767	1.19477e-08	0.519783	0.120741	0.898181	0.837152
275	butyrylcarnitine (C4)	434	TRUE	-1.56863	-0.00424169	0.165344	0.47461	0.148725	0.00924381	0.0315739	-1.15505	-1.48462	1.45636e-05	0.972017	0.281514	6.77751e-07	0.586772	0.301359	1.39406e-05	0.695748	0.5734	0.898181	0.994209
99	trans-4-hydroxyproline	434	TRUE	-0.200045	0.228402	-0.169615	0.309024	-0.309904	-0.00714839	0.0128516	-4.92567	3.20484	0.590853	0.0662475	0.28271	0.00165966	0.27077	0.437052	0.0854954	0.104877	0.237241	0.898181	0.381313
756	1-methylhistidine	434	TRUE	-0.848725	0.159617	-0.143878	0.90558	-0.165504	0.00707052	0.00242866	4.13363	2.35431	0.00718039	0.1303	0.282802	1.7185e-27	0.488171	0.364907	0.701692	0.108706	0.306134	0.898181	0.5054
45	X - 19141	434	TRUE	-0.037431	-0.00913043	0.160022	0.174797	0.421196	0.0116307	-0.0181129	27.651	1.69528	0.915182	0.938034	0.283238	0.0596127	0.113018	0.180623	0.0102836	5.49544e-22	0.508003	0.898181	0.983795
375	palmitate (16:0)	434	TRUE	-0.464099	-0.262584	0.157132	-0.183553	0.285031	-3.98489e-05	0.0162822	-6.03602	-1.06653	0.183436	0.0243095	0.28849	0.0463099	0.279993	0.996313	0.0201386	0.0340473	0.674843	0.898181	0.300873
511	phosphatidylcholine (14:0/14:0, 16:0/12:0)	434	TRUE	-0.65553	0.0977822	0.158276	-0.446578	-0.0548748	0.0242968	-0.000311329	8.49697	0.614832	0.0625097	0.405738	0.289187	1.54131e-06	0.836646	0.00522187	0.964867	0.00309846	0.81053	0.898181	0.754456
196	X - 11858	434	TRUE	0.512604	0.130669	-0.16743	-0.0800955	-0.357452	0.000591268	-0.0167862	-3.50281	-2.96796	0.168844	0.293924	0.289532	0.415512	0.204531	0.948806	0.0248665	0.249386	0.274286	0.898181	0.687613
214	N-acetylarginine	434	TRUE	-0.447518	0.169109	-0.152519	0.411869	0.24621	0.00533373	-0.00835779	9.198	10.1833	0.188172	0.136725	0.290506	4.49571e-06	0.338362	0.525727	0.221046	0.000920958	3.96619e-05	0.898181	0.5054
140	hexadecadienoate (16:2n6)	434	TRUE	0.342636	-0.327221	0.162482	-0.435158	-0.127387	-0.0177389	0.0145582	-4.9459	-1.84683	0.345372	0.00700525	0.291627	5.66054e-06	0.642718	0.0481136	0.0459053	0.0951871	0.485203	0.898181	0.190203
380	branched-chain fatty acid 18:0 (2)**	434	TRUE	0.246756	0.0225149	-0.175721	0.252465	0.183836	-0.00821549	0.00124401	2.92425	0.874072	0.529915	0.863828	0.291797	0.0149347	0.536039	0.397518	0.874713	0.361804	0.760109	0.898181	0.966405
639	gamma-glutamylcitrulline*	434	TRUE	0.542591	0.0682396	0.163743	0.199459	0.0523355	0.00325584	-0.033931	3.61401	-2.88059	0.138444	0.577124	0.292	0.0391386	0.850113	0.719092	3.96305e-06	0.226677	0.280402	0.898181	0.834037
774	ethyl alpha-glucopyranoside	434	TRUE	0.208461	0.265463	-0.164683	0.371009	0.00766999	0.00145063	-0.0163042	1.73061	5.06302	0.571966	0.0312716	0.292703	0.000139315	0.978063	0.873586	0.0277443	0.565437	0.0596121	0.898181	0.300873
620	(16 or 17)-methylstearate (a19:0 or i19:0)	434	TRUE	-0.566248	-0.0752274	0.168113	-0.152602	0.305583	0.0144663	2.02874e-05	-2.60425	-0.594204	0.13263	0.549952	0.292709	0.124814	0.283206	0.120121	0.99786	0.396834	0.828555	0.898181	0.822632
452	gluconate	434	TRUE	-1.34493	0.0854024	-0.159493	-0.343481	-0.209214	0.0278838	0.0108971	7.40335	-0.132675	0.000166668	0.474379	0.292711	0.000271102	0.43868	0.00158985	0.128805	0.011122	0.959352	0.898181	0.779896
318	3beta-hydroxy-5-cholestenoate	434	TRUE	1.65092	-0.393992	0.147276	0.559698	-0.018013	-0.00565412	-0.0581762	8.20843	6.41164	5.98625e-07	0.000364264	0.293974	1.46357e-10	0.942587	0.489177	1.98266e-18	0.00236207	0.00780652	0.898872	0.0466258
512	3-methyl-2-oxovalerate	434	TRUE	-0.777761	-0.0775736	0.139161	1.04956	0.280217	-0.00060185	0.0189946	-3.33993	-5.32657	0.0130011	0.458515	0.294942	6.3933e-37	0.236687	0.938023	0.00252557	0.191331	0.0195808	0.898872	0.774427
592	valine	434	TRUE	-1.51604	0.0296809	0.152563	0.753162	0.0488071	0.00374846	0.0357043	-6.98622	-1.71449	1.14583e-05	0.797142	0.298065	1.51464e-16	0.851827	0.660741	2.67354e-07	0.0132494	0.495916	0.90125	0.952773
582	1-palmitoyl-2-arachidonoyl-GPC (16:0/20:4n6)	434	TRUE	-0.99275	-0.0113727	-0.166405	0.131841	-0.000316556	0.0216586	0.00663835	-0.500919	5.61828	0.00850248	0.928124	0.298569	0.185664	0.999115	0.0202029	0.380961	0.870786	0.0409898	0.90125	0.979579
765	dihomo-linolenate (20:3n3 or n6)	434	TRUE	-0.549455	-0.170779	0.150133	-0.0941568	0.400969	0.00247941	0.0155174	0.39631	-0.773819	0.107476	0.13437	0.299953	0.29618	0.120355	0.768871	0.0236079	0.886898	0.755734	0.90125	0.5054
297	cys-gly, oxidized	434	TRUE	0.399948	-0.085835	0.15623	0.484589	-0.461922	-0.00838398	-0.00927899	9.03039	3.61118	0.260615	0.470019	0.300381	2.4422e-07	0.085786	0.340073	0.193769	0.00186031	0.163358	0.90125	0.778442
407	X - 15728	434	TRUE	0.687794	-0.186782	-0.159365	0.0689236	0.0321076	0.00070021	-0.0251344	2.45659	4.77028	0.0580851	0.123565	0.300752	0.472009	0.906875	0.937788	0.000564435	0.406992	0.0712847	0.90125	0.504402
642	X - 11849	434	TRUE	0.159122	0.0679091	-0.15869	0.0617865	-0.156167	0.00422001	-0.0117948	-8.53308	-4.15869	0.660653	0.575037	0.302156	0.518536	0.568852	0.637625	0.10517	0.00392501	0.115367	0.902439	0.832363
726	eicosanedioate (C20-DC)	434	TRUE	0.911996	-0.0806286	-0.158512	0.206373	-0.169476	-0.00794824	-0.0194123	-1.39758	2.41767	0.0122543	0.507564	0.304899	0.0318266	0.53823	0.377169	0.0079402	0.638192	0.362191	0.907606	0.801773
0	linoleoyl ethanolamide	434	TRUE	-0.0844161	-0.257217	0.155599	0.00391903	-0.424587	-0.0148398	0.0185953	-7.55026	3.03072	0.813941	0.0318861	0.306622	0.966993	0.117519	0.0941798	0.00984335	0.00991686	0.246252	0.909394	0.300873
238	cysteinylglycine	434	TRUE	0.596235	-0.263258	0.151127	0.329048	-0.186246	-0.00600757	-0.0125882	8.4048	-2.03944	0.0900184	0.0250975	0.311205	0.000395074	0.483765	0.489533	0.0747225	0.00341536	0.426167	0.909394	0.300873
51	1-stearoyl-2-dihomo-linolenoyl-GPE (18:0/20:3n3 or 6)*	434	TRUE	-1.77566	0.0941338	0.14823	-0.344742	0.81417	0.0314282	0.0273662	1.55849	-3.56384	2.64537e-07	0.414204	0.31124	0.000153938	0.0018038	0.000228188	7.82278e-05	0.579962	0.156294	0.909394	0.757402
502	N-acetylcitrulline	434	TRUE	-1.51924	0.180349	-0.139141	0.333899	0.568039	0.0100531	0.0270505	3.65301	8.78996	2.72194e-06	0.0956574	0.311316	9.44469e-05	0.0203839	0.209209	3.20224e-05	0.167048	0.000195818	0.909394	0.437291
821	etiocholanolone glucuronide	434	TRUE	1.61176	0.20953	0.135919	0.473694	-0.549743	-0.0272197	-0.0199048	12.0069	2.34172	3.52548e-07	0.047567	0.311454	1.43792e-08	0.0216158	0.00050209	0.00173799	3.3525e-06	0.309902	0.909394	0.332969
171	4-methyl-2-oxopentanoate	434	TRUE	-0.817133	-0.126389	0.139163	1.03989	0.241198	0.00927561	0.00774181	-1.23421	-4.40283	0.0116981	0.243256	0.311589	5.66441e-34	0.325089	0.246953	0.234314	0.640856	0.0623009	0.909394	0.653596
155	sphingomyelin (d18:2/21:0, d16:2/23:0)*	434	TRUE	-1.97269	0.0639206	0.139677	-0.397425	-0.51922	0.031413	0.0273621	-0.148906	2.60455	1.45852e-09	0.557534	0.312798	3.92586e-06	0.0352668	9.74771e-05	2.94698e-05	0.955393	0.273097	0.909958	0.827579
167	3-hydroxy-3-methylglutarate	434	TRUE	-0.344404	0.117921	0.139828	-0.237727	0.563332	0.0104007	-0.00813532	4.73765	2.91828	0.293418	0.28172	0.314754	0.00602154	0.0230575	0.199274	0.216562	0.0766296	0.22182	0.910057	0.680313
393	1-palmitoyl-2-linoleoyl-GPI (16:0/18:2)	434	TRUE	-1.01838	0.226841	-0.153443	-0.39814	0.203119	0.0139549	0.0258086	3.92548	-6.49982	0.00473307	0.0597319	0.315845	2.88515e-05	0.456275	0.117369	0.000364807	0.182246	0.0133596	0.910057	0.371665
842	hydroxy-CMPF*	434	TRUE	0.578723	0.0850884	0.149945	0.195082	-0.420072	0.0115786	-0.0468412	-3.88467	0.172906	0.102623	0.472673	0.318912	0.0371747	0.117183	0.186445	4.76408e-11	0.179512	0.946643	0.910057	0.779896
14	1-palmitoyl-2-docosahexaenoyl-GPE (16:0/22:6)*	434	TRUE	-0.811901	0.156437	0.154619	-0.480567	0.549816	0.0439442	-0.0260576	-6.95096	0.359339	0.026476	0.200719	0.319251	6.53534e-07	0.046898	1.17836e-06	0.000390706	0.019938	0.892783	0.910057	0.605537
659	3,5-dichloro-2,6-dihydroxybenzoic acid	434	TRUE	-1.15722	-0.105413	0.155319	0.533396	0.204583	-0.00690374	0.0391682	0.754605	-2.83805	0.00164222	0.390798	0.319321	3.8877e-08	0.461735	0.447344	1.122e-07	0.801425	0.289343	0.910057	0.743428
688	creatine	434	TRUE	-0.659545	0.233262	-0.142403	-0.689136	0.0566671	-8.67987e-05	0.0302146	-7.18856	-5.16269	0.0508404	0.0387616	0.320378	1.09514e-14	0.824417	0.991704	8.41285e-06	0.00912091	0.0359325	0.910057	0.304653
244	N4-acetylcytidine	434	TRUE	-0.787888	0.187539	0.148974	0.0572678	0.487467	-0.00927671	0.034737	17.5231	-4.13007	0.0258717	0.112506	0.320768	0.539641	0.0683169	0.288537	1.00186e-06	1.27243e-09	0.108978	0.910057	0.483028
108	sphingomyelin (d18:2/23:1)*	434	TRUE	-1.49871	0.106193	0.145839	-0.243795	-0.693446	0.0213802	0.0254279	-2.44896	1.16503	1.545e-05	0.359446	0.321582	0.00775006	0.00818175	0.0126148	0.000260912	0.386917	0.644747	0.910057	0.719713
745	1-(1-enyl-stearoyl)-2-linoleoyl-GPE (P-18:0/18:2)*	434	TRUE	-0.0594433	0.436212	-0.149366	0.131696	-0.227827	0.0194335	-0.0267557	-9.1213	1.6202	0.867176	0.00024012	0.321973	0.160523	0.396646	0.0269656	0.000178089	0.00166688	0.531602	0.910057	0.035858
289	stearoylcarnitine (C18)	434	TRUE	-1.01433	0.0824381	0.14027	0.799675	-0.391615	0.0390256	-0.033292	-5.51552	0.500791	0.00243338	0.460963	0.323159	1.41121e-19	0.121701	2.37532e-06	7.26402e-07	0.0434441	0.837267	0.910536	0.774427
250	cinnamoylglycine	434	TRUE	0.452554	0.0709589	-0.146035	-0.341292	0.0267195	0.0154849	-0.0375498	14.098	1.98405	0.195994	0.544055	0.325432	0.000221493	0.919588	0.0734651	9.19156e-08	8.02519e-07	0.436607	0.911431	0.819586
687	glucose	434	TRUE	-2.1786	0.344863	-0.131855	0.146134	0.216668	0.0214412	0.0412482	-4.73984	-1.21482	5.4609e-12	0.00109426	0.325511	0.0799286	0.364668	0.00606005	8.12978e-11	0.066179	0.597873	0.911431	0.0700324
10	diacylglycerol (16:1/18:2 [2], 16:0/18:3 [1])*	434	TRUE	-2.07456	-0.000416328	0.143355	0.075165	0.601425	0.02074	0.0463964	3.9507	-8.47188	1.85634e-09	0.99712	0.327712	0.409556	0.0212275	0.0150696	2.19603e-11	0.160887	0.000757255	0.911956	0.997683
624	threonine	434	TRUE	0.626747	0.25304	-0.161136	-0.0246155	-0.21685	-0.0153737	-0.00450282	-2.4853	3.66823	0.106851	0.0514002	0.32855	0.810444	0.460662	0.109557	0.564053	0.433427	0.195275	0.911956	0.341612
601	1-stearoyl-2-dihomo-linolenoyl-GPI (18:0/20:3n3 or 6)*	434	TRUE	-1.53846	0.1846	0.160413	-0.206438	0.14142	0.037393	0.00608527	4.76871	-9.02665	7.05713e-05	0.153575	0.328752	0.0434094	0.629027	9.3066e-05	0.433783	0.13125	0.00137414	0.911956	0.535422
399	N-formylphenylalanine	434	TRUE	0.0665162	0.0401766	0.155771	-0.0651337	-0.238118	0.00456453	-0.00853227	-7.1999	-2.82446	0.861022	0.751674	0.333923	0.516166	0.407242	0.626941	0.263492	0.0202567	0.307648	0.913645	0.929496
322	biliverdin	434	TRUE	0.0327891	-0.0927141	0.153606	0.59945	-0.0825027	0.0162012	-0.0312658	-0.355041	-2.13056	0.930365	0.459673	0.33466	1.44457e-09	0.771243	0.0806773	3.34112e-05	0.907718	0.435863	0.913645	0.774427
80	X - 12906	434	TRUE	-0.21614	0.113751	-0.14684	0.356684	-0.271064	0.0157851	-0.0287029	3.92078	5.83917	0.548439	0.344625	0.336641	0.000176423	0.319646	0.0762217	7.24879e-05	0.182337	0.0260964	0.913645	0.714777
561	X - 11795	434	TRUE	0.868107	-0.0350133	-0.146429	0.475846	0.327881	-0.0185454	-0.0163579	4.81432	1.28112	0.0157847	0.770797	0.337274	5.4127e-07	0.227978	0.0369605	0.0235285	0.101012	0.62495	0.913645	0.937089
607	indoleacetate	434	TRUE	0.0140098	0.0583557	-0.136608	0.40727	0.142658	-0.00287544	-0.00526251	1.71476	-5.8962	0.966776	0.603639	0.338471	4.52116e-06	0.574895	0.729449	0.435957	0.532255	0.016144	0.913645	0.849075
166	eicosenoate (20:1)	434	TRUE	0.0155578	-0.168014	0.147981	-0.167389	0.28155	0.00665452	-0.0117451	-5.44304	0.0612485	0.966119	0.169855	0.341007	0.0834807	0.309396	0.462324	0.110341	0.0686724	0.981692	0.913645	0.565738
805	proline	434	TRUE	-0.882222	-0.1036	-0.140832	0.624208	0.0184919	-0.00837442	0.0337157	2.40141	0.745738	0.0114718	0.374361	0.341575	1.25165e-11	0.944139	0.331642	1.50604e-06	0.39923	0.769335	0.913645	0.731366
818	sphingomyelin (d18:2/18:1)*	434	TRUE	-1.12034	0.0276904	0.139018	-0.17834	-0.704001	0.00325314	0.0378142	-2.11978	-1.77428	0.00115006	0.809987	0.341754	0.0500045	0.00690583	0.702536	4.66756e-08	0.451115	0.479855	0.913645	0.953114
12	1-myristoyl-GPC (14:0)	434	TRUE	-1.07374	0.14909	0.141849	-0.184356	0.272617	0.0318948	-0.000637149	11.7279	-2.42851	0.00230597	0.205401	0.342684	0.0475022	0.3062	0.00024977	0.92825	4.54086e-05	0.344182	0.913645	0.609401
542	O-sulfo-L-tyrosine	434	TRUE	-0.710902	-0.0784244	-0.13992	0.399598	-0.0415041	0.0141983	-0.00271663	12.2001	-0.192127	0.0410441	0.50003	0.343288	1.36527e-05	0.87467	0.0987791	0.697467	1.74403e-05	0.9396	0.913645	0.797201
404	1-(1-enyl-stearoyl)-2-dihomo-linolenoyl-GPE (P-18:0/20:3)*	434	TRUE	-1.31628	0.254109	0.149521	0.132025	0.105241	0.0313529	0.00267852	1.15833	3.07521	0.000407974	0.0411484	0.343988	0.17934	0.708607	0.000658445	0.720225	0.703143	0.257086	0.913645	0.305869
204	1-margaroyl-2-oleoyl-GPC (17:0/18:1)*	434	TRUE	-1.25321	0.299413	0.144831	0.0492995	0.164456	0.0569876	-0.0371464	-3.39173	3.71291	0.000523505	0.0131499	0.344827	0.605333	0.547261	1.76221e-10	3.07268e-07	0.25015	0.158491	0.913645	0.240455
532	cortolone glucuronide (1)	434	TRUE	-2.62698	-0.0216745	0.12818	0.400515	-0.306808	0.00901739	0.0730926	-3.68673	-1.82081	2.30147e-16	0.839462	0.345402	2.1602e-06	0.205085	0.254513	6.07677e-30	0.15833	0.435126	0.913645	0.956008
484	X - 24411	434	TRUE	-0.029645	-0.0979788	-0.146113	0.186441	0.252468	-0.00938948	0.00781527	-5.60539	-2.21425	0.935914	0.426488	0.350318	0.055473	0.365204	0.302874	0.291224	0.0625283	0.409851	0.913645	0.762442
476	gamma-glutamylisoleucine*	434	TRUE	-1.99737	-0.027889	-0.115842	1.02506	0.287425	-0.00129038	0.0505371	-2.38546	-1.15535	9.98186e-12	0.776103	0.352177	5.89319e-40	0.195238	0.8588	9.88911e-18	0.319299	0.588984	0.913645	0.940812
456	oxalate (ethanedioate)	434	TRUE	0.912755	0.024643	0.137318	-0.248695	-0.872481	0.0142984	-0.0472779	6.82195	3.08109	0.00869422	0.832122	0.352219	0.00677809	0.000911419	0.0963418	1.31478e-11	0.0162854	0.224196	0.913645	0.954174
557	N-acetylserine	434	TRUE	-0.216603	0.107996	0.137702	0.206122	-0.13546	-0.00366955	0.00317862	9.28766	3.861	0.535174	0.354855	0.352832	0.0254211	0.608072	0.670821	0.650465	0.00112397	0.129287	0.913645	0.719713
881	N-acetylvaline	434	TRUE	-1.29439	0.134035	0.135862	0.31054	-0.190458	0.0132861	0.0146909	3.95446	-0.078011	0.000177688	0.245394	0.353758	0.000658732	0.465753	0.119542	0.034133	0.160599	0.975266	0.913645	0.653596
131	arabonate/xylonate	434	TRUE	-0.535331	0.0132483	-0.13765	-0.00460635	0.277065	0.0302784	-0.0292696	10.8217	2.15101	0.126565	0.909919	0.354539	0.960291	0.295745	0.000472497	3.19345e-05	0.000154603	0.399552	0.913645	0.974473
350	2-oxoarginine*	434	TRUE	-1.22509	0.118449	0.138286	0.391501	0.456952	-0.0038032	0.0423405	1.58413	-2.6725	0.000519826	0.315359	0.35591	2.66784e-05	0.0869602	0.662948	2.34514e-09	0.582499	0.298861	0.913645	0.695477
15	hydroxyasparagine**	434	TRUE	-2.47542	0.0173044	-0.115145	0.135659	-0.38598	0.0180955	0.0480088	8.9883	0.164938	4.55119e-17	0.860556	0.35726	0.0813395	0.0833628	0.0130091	5.0871e-16	0.000187308	0.938794	0.913645	0.966405
18	oleoyl-oleoyl-glycerol (18:1/18:1) [2]*	434	TRUE	-2.15567	0.134053	0.141437	0.36202	0.569607	0.0331545	0.0262849	2.63711	-4.71099	2.68778e-09	0.268236	0.357581	0.00015425	0.0376302	0.00021394	0.000303652	0.372577	0.0743768	0.913645	0.667515
547	1-methyl-5-imidazoleacetate	434	TRUE	-0.852663	0.164284	-0.136527	0.827927	-0.553695	0.00404473	0.00932173	10.8239	0.30533	0.0148465	0.160163	0.35795	3.29054e-19	0.0364511	0.640136	0.184814	0.000151572	0.904712	0.913645	0.54983
520	3-methylxanthine	434	TRUE	0.00421301	0.0403843	-0.139123	-0.214165	-0.0895658	0.00845167	-0.0106088	17.8087	-1.83005	0.990598	0.735361	0.35911	0.0232903	0.740444	0.338897	0.139557	1.04624e-09	0.482414	0.913645	0.928005
32	methyl glucopyranoside (alpha + beta)	434	TRUE	0.238254	0.124314	-0.142222	-0.0181747	0.381946	0.0141266	-0.0318507	-4.69674	2.02629	0.514604	0.308918	0.359249	0.850662	0.167133	0.118003	1.43914e-05	0.115528	0.446909	0.913645	0.695477
857	X - 12007	434	TRUE	-0.931722	-0.0380929	-0.134639	0.260874	0.154667	0.012989	0.00611209	-3.20211	1.70315	0.00710706	0.741915	0.359293	0.00431216	0.554604	0.128979	0.379282	0.25708	0.499528	0.913645	0.928248
126	glycerol	434	TRUE	-0.621733	-0.136415	0.12459	-0.598785	-0.0682387	0.00299833	0.0219062	-5.74642	1.9025	0.052403	0.202803	0.359611	1.49005e-12	0.778302	0.705091	0.000666253	0.0280624	0.41532	0.913645	0.607747
414	1-stearoyl-2-docosapentaenoyl-GPE (18:0/22:5n6)*	434	TRUE	-1.65309	0.0249106	0.137108	-0.269634	0.78354	0.0235206	0.03275	-2.30056	2.65498	2.83391e-06	0.832773	0.360044	0.0038211	0.00333696	0.00703172	3.85601e-06	0.424683	0.302059	0.913645	0.954174
338	stearoylcholine*	434	TRUE	-0.108447	0.0703099	-0.140604	0.10664	-0.451124	0.0169363	-0.0259439	3.08586	3.56894	0.766343	0.564267	0.363879	0.268432	0.102129	0.0604502	0.000400576	0.300252	0.179586	0.913645	0.827579
524	1-eicosapentaenoyl-GPE (20:5)*	434	TRUE	-0.559762	0.216614	-0.136475	0.153347	0.0235325	0.0323559	-0.0335946	5.0032	3.25674	0.115594	0.0684368	0.36592	0.102557	0.930294	0.000233529	2.5743e-06	0.0848894	0.208997	0.913645	0.388097
455	perfluorooctanoate (PFOA)	434	TRUE	0.193465	0.0839556	-0.126976	0.94092	0.190241	-0.00330793	-0.0248546	-1.31075	-2.97693	0.560021	0.449157	0.367331	6.96553e-27	0.44855	0.686839	0.000192933	0.628572	0.218446	0.913645	0.771421
268	X - 18921	434	TRUE	0.667736	-0.255711	-0.131987	0.118233	0.140056	-0.0227296	0.00766336	-6.13887	-6.35285	0.053357	0.0268303	0.368115	0.195111	0.592054	0.00779986	0.269581	0.0295557	0.0116541	0.913645	0.300873
335	ectoine	434	TRUE	0.0453149	0.0784892	-0.143867	0.369278	-0.28273	-0.00846401	0.00246163	4.09997	1.97524	0.904371	0.53348	0.368691	0.000208947	0.32158	0.36396	0.745211	0.182969	0.472355	0.913645	0.814307
142	X - 22776	434	TRUE	-0.000214085	0.0495891	-0.156671	-0.196936	0.0649534	0.00115388	0.00343179	-5.45238	-4.19809	0.999585	0.718271	0.369352	0.0697802	0.834588	0.909639	0.677824	0.104384	0.161322	0.913645	0.919309
235	3-carboxy-4-methyl-5-propyl-2-furanpropanoate (CMPF)	434	TRUE	-0.245941	0.169834	0.132902	0.32866	-0.102386	0.0161018	-0.0280409	-3.931	-2.29452	0.481116	0.145451	0.369605	0.000363079	0.698143	0.0620411	6.34858e-05	0.167742	0.367071	0.913645	0.51922
24	X - 18886	434	TRUE	-0.474571	0.0980363	-0.135535	0.474484	-0.124431	-0.00541513	0.0175152	-2.67084	-2.70681	0.18287	0.410295	0.369981	4.56841e-07	0.644215	0.53864	0.0143762	0.358442	0.297157	0.913645	0.754456
69	sphingomyelin (d18:0/18:0, d19:0/17:0)*	434	TRUE	-2.51052	0.303992	0.135092	0.117933	-0.181315	0.0269617	0.0498062	-3.70377	-1.34765	1.55729e-12	0.0104228	0.369986	0.208504	0.499592	0.00213032	2.88715e-12	0.201366	0.602536	0.913645	0.222354
586	pyridoxate	434	TRUE	0.0295595	0.240911	-0.129259	0.326156	-0.390324	0.0113063	-0.0249297	7.0213	3.2986	0.930755	0.0340755	0.370522	0.000282144	0.129198	0.17875	0.000263338	0.0114531	0.183297	0.913645	0.300873
389	X - 24813	434	TRUE	-0.185149	0.13168	-0.13308	0.146501	-0.486669	0.00162806	0.000153674	-2.72944	-3.97924	0.597906	0.261671	0.371637	0.11399	0.0667739	0.851173	0.98261	0.340841	0.11982	0.913645	0.663925
637	1-arachidoyl-GPC (20:0)	434	TRUE	1.12603	0.141496	-0.118584	0.117919	-0.0651545	0.0134767	-0.0627757	7.34161	0.993553	0.000322502	0.17626	0.372061	0.153752	0.783177	0.0816154	1.80256e-23	0.00407025	0.663213	0.913645	0.568091
141	1-palmitoyl-2-arachidonoyl-GPI (16:0/20:4)*	434	TRUE	-1.30909	0.137641	-0.136657	-0.143264	0.159806	0.0208423	0.019885	5.38132	0.549228	0.000286933	0.253829	0.372247	0.132784	0.558242	0.0194875	0.00608666	0.0677821	0.834595	0.913645	0.663009
661	gamma-glutamylglycine	434	TRUE	0.549393	0.0760556	-0.13432	0.0876269	-0.705461	0.00341491	-0.0317695	6.44913	3.07337	0.121698	0.521438	0.372522	0.349843	0.00859039	0.697136	8.3431e-06	0.0260359	0.234787	0.913645	0.808318
348	N2,N2-dimethylguanosine	434	TRUE	-1.79622	0.0227847	0.129088	0.136792	-0.374282	0.00606638	0.0427472	0.762976	0.597596	1.78061e-07	0.842909	0.376557	0.132113	0.150276	0.475635	6.15042e-10	0.785868	0.8116	0.913645	0.956008
680	N-acetylglucosamine/N-acetylgalactosamine	434	TRUE	-1.24975	0.00193093	0.129515	0.0361704	0.0610885	-0.00782083	0.0487471	4.20698	2.21422	0.000302411	0.986672	0.37752	0.692066	0.815336	0.360316	2.26042e-12	0.136207	0.379673	0.913645	0.996683
382	X - 15503	434	TRUE	-1.38066	0.144086	-0.126657	0.401978	-0.447383	0.0022297	0.0277703	3.75331	-5.27427	4.98988e-05	0.205274	0.380528	7.73088e-06	0.0822138	0.791007	4.86196e-05	0.176752	0.0334753	0.913645	0.609401
517	1-(1-enyl-stearoyl)-2-docosahexaenoyl-GPE (P-18:0/22:6)*	434	TRUE	0.221841	0.25421	-0.133803	0.257281	-0.237249	0.021503	-0.044314	-12.8936	7.092	0.537354	0.0344233	0.380604	0.00674326	0.383046	0.0155719	8.51806e-10	1.12367e-05	0.00680935	0.913645	0.300873
735	bilirubin (Z,Z)	434	TRUE	-0.081159	-0.0156864	0.141166	0.527104	-0.0307152	0.0161299	-0.0258262	-0.733149	-0.182913	0.830729	0.901604	0.380879	1.45582e-07	0.914805	0.0856574	0.000706549	0.812991	0.947287	0.913645	0.974473
249	citrate	434	TRUE	-0.360228	0.10811	0.132698	-0.0897675	-0.16596	0.00966759	-0.0127367	-4.4512	0.961884	0.313033	0.364919	0.381104	0.341019	0.538804	0.273353	0.0757131	0.126707	0.711618	0.913645	0.723379
156	X - 12524	434	TRUE	0.130248	0.100257	0.120601	-0.11508	0.0556031	0.00791439	-0.0173864	4.23115	-1.33682	0.688319	0.355506	0.381381	0.179499	0.820855	0.324083	0.00767235	0.110399	0.57208	0.913645	0.719713
591	alpha-ketobutyrate	434	TRUE	-0.959801	0.053133	0.129365	0.130127	0.332124	-0.0023965	0.0342323	-8.01536	-3.37579	0.00593272	0.64854	0.382119	0.157717	0.208027	0.781062	1.02784e-06	0.00487854	0.184169	0.913645	0.881779
185	perfluorooctanesulfonate (PFOS)	434	TRUE	-0.654666	-0.0826386	-0.115081	0.928709	0.0604935	0.0100054	-0.0107251	1.89169	-1.06335	0.0355407	0.427172	0.383822	1.40479e-29	0.797288	0.193686	0.0863941	0.456791	0.639384	0.913645	0.762442
676	1-(1-enyl-palmitoyl)-2-arachidonoyl-GPE (P-16:0/20:4)*	434	TRUE	-0.36554	0.20784	-0.137166	0.502806	-0.295897	5.65869e-05	0.00758134	-8.70454	2.60188	0.327104	0.095448	0.386148	3.30669e-07	0.294196	0.995103	0.311544	0.0042525	0.338459	0.913645	0.437291
169	EDTA	434	TRUE	-0.243029	0.049427	0.124143	0.396068	0.461358	-0.00567457	0.0084118	-7.38532	-3.41729	0.472876	0.662221	0.387515	9.4048e-06	0.0715609	0.497737	0.216064	0.00753398	0.166026	0.913645	0.885718
121	androstenediol (3beta,17beta) monosulfate (1)	434	TRUE	0.58398	0.00567773	-0.0995303	0.854841	-0.562069	-0.0226153	0.0129177	-4.00481	-3.6321	0.0315636	0.950127	0.387839	9.45159e-33	0.00621477	0.000756482	0.0178903	0.0708889	0.0665133	0.913645	0.985317
306	1-palmitoyl-2-linoleoyl-GPC (16:0/18:2)	434	TRUE	-0.585948	0.316225	-0.139058	-0.27952	-0.299296	0.0212549	-0.00184158	-2.7444	-9.34971	0.123261	0.012811	0.388682	0.00536116	0.297873	0.0237112	0.80941	0.376516	0.000738607	0.913645	0.239139
776	sarcosine	434	TRUE	0.683053	0.0145085	-0.130984	0.296947	0.0941454	-0.02763	0.00279609	-2.87108	-2.1491	0.05684	0.903649	0.389389	0.00171415	0.728502	0.00182867	0.697878	0.326733	0.410897	0.913645	0.974473
148	X - 17010	434	TRUE	0.640341	0.200632	0.134693	0.0526635	0.046069	-0.0211542	0.00402123	-9.9142	2.02534	0.0826844	0.10374	0.389654	0.588845	0.868873	0.0203815	0.587404	0.000996701	0.451327	0.913645	0.455641
555	11beta-hydroxyandrosterone glucuronide	434	TRUE	-1.10974	-0.197949	-0.133918	0.959338	-0.0181504	0.00918188	0.010082	6.79511	-2.78871	0.0025098	0.106721	0.39007	4.39965e-23	0.947886	0.31173	0.171598	0.0233898	0.297326	0.913645	0.466449
473	9,10-DiHOME	434	TRUE	1.89243	-0.0166268	-0.149306	-0.120217	0.294288	-0.0115884	-0.0501869	-0.394609	-1.3011	4.02299e-06	0.903528	0.391331	0.267367	0.343122	0.253412	1.14644e-09	0.906251	0.663586	0.913645	0.974473
809	1-(1-enyl-palmitoyl)-2-oleoyl-GPC (P-16:0/18:1)*	434	TRUE	1.82473	0.135623	-0.10844	-0.290507	-0.7409	0.011517	-0.0782693	-2.54797	5.91244	9.40443e-10	0.173524	0.39143	0.000224599	0.00101805	0.118171	4.95161e-39	0.295204	0.00651072	0.913645	0.565738
514	1-stearoyl-2-docosapentaenoyl-GPC (18:0/22:5n3)*	434	TRUE	-0.898834	0.043305	-0.128051	0.36702	-0.105262	0.0280499	-0.0160043	3.86092	8.82026	0.0107413	0.713038	0.391725	7.97964e-05	0.692809	0.00127896	0.0237195	0.179463	0.000591979	0.913645	0.916617
396	linoleoylcholine*	434	TRUE	0.0568487	0.117506	-0.130981	0.0108227	-0.542483	0.0173844	-0.0299858	2.38141	2.95492	0.87518	0.331253	0.393687	0.909826	0.0474622	0.0519745	3.69926e-05	0.42017	0.262515	0.913645	0.701662
764	S-methylcysteine sulfoxide	434	TRUE	1.34866	-0.116069	0.131563	-0.0450614	0.38324	-0.00358356	-0.0433038	4.92398	1.60801	0.000215907	0.340705	0.395019	0.639675	0.164475	0.690853	3.32397e-09	0.0979731	0.544961	0.913645	0.711589
636	1-arachidonylglycerol (20:4)	434	TRUE	-0.693692	0.0151002	-0.126327	0.0392117	0.30701	0.0160018	-0.00346127	-3.25477	7.28562	0.0475222	0.897296	0.395066	0.671403	0.246168	0.0644172	0.622497	0.25469	0.00428951	0.913645	0.974473
230	linolenate [alpha or gamma; (18:3n3 or 6)]	434	TRUE	0.816023	-0.409205	0.128374	-0.428687	0.301198	-0.021336	0.00258927	-5.28062	-2.14569	0.0219579	0.000586151	0.395641	5.15583e-06	0.263463	0.0153733	0.717375	0.0693241	0.408401	0.913645	0.0583546
352	X - 11315	434	TRUE	0.890307	0.0396809	-0.118552	0.133152	0.0369966	0.00709306	-0.0472625	1.74327	-0.185292	0.00703136	0.719236	0.397635	0.126839	0.882257	0.384987	1.04558e-12	0.517922	0.938639	0.91589	0.919309
333	S-methylcysteine	434	TRUE	1.14643	-0.14883	0.129324	0.0505419	0.452891	-0.00369585	-0.0357544	2.78274	0.670553	0.00151327	0.217844	0.399053	0.596362	0.097506	0.679085	8.39699e-07	0.345542	0.799021	0.916798	0.623606
55	quinolinate	434	TRUE	-2.18186	0.188392	0.114625	0.0879328	0.0410608	0.0070018	0.0601137	11.579	1.57608	1.19269e-11	0.0797611	0.401146	0.300658	0.865993	0.378659	1.37158e-20	1.04005e-05	0.501457	0.919251	0.404876
635	ursodeoxycholate	434	TRUE	-0.0832582	-0.114968	-0.128763	0.220405	0.763451	-0.00647293	0.013687	-10.7787	-8.5766	0.818538	0.343129	0.403036	0.0214378	0.00540435	0.470539	0.0603921	0.000274055	0.00118187	0.920921	0.71439
421	S-1-pyrroline-5-carboxylate	434	TRUE	-0.450942	-0.0297934	-0.129755	0.183391	-0.0994744	0.00882068	-0.00209645	3.14148	6.31522	0.219133	0.808047	0.40467	0.0583994	0.720006	0.330836	0.776062	0.294295	0.0181955	0.920921	0.953114
618	1-eicosapentaenoyl-GPC (20:5)*	434	TRUE	-0.434609	0.180755	-0.122642	0.36627	-0.128986	0.028597	-0.0359243	6.37127	4.93095	0.211578	0.120011	0.406088	6.68414e-05	0.623944	0.00088279	2.72568e-07	0.0248616	0.0517725	0.920921	0.500507
21	isobutyrylcarnitine (C4)	434	TRUE	-0.119761	0.144842	-0.129574	0.555828	0.00941257	0.00971752	-0.0216552	-2.76604	-1.56975	0.744599	0.238405	0.406165	1.02744e-08	0.972991	0.284898	0.00335715	0.356656	0.557898	0.920921	0.65223
691	sphingomyelin (d17:1/16:0, d18:1/15:0, d16:1/17:0)*	434	TRUE	-1.46925	0.0524218	0.129127	0.0866534	-0.681965	0.0298308	0.00905645	4.45527	3.58074	6.71536e-05	0.67041	0.409015	0.373268	0.0144207	0.00105959	0.221176	0.138662	0.182484	0.920921	0.887278
68	docosapentaenoate (n6 DPA; 22:5n6)	434	TRUE	0.327935	-0.126111	0.123357	-0.0795181	0.30991	-0.0117424	0.00547151	-2.44583	3.08279	0.35225	0.284408	0.40956	0.392953	0.245041	0.177804	0.439642	0.395353	0.230124	0.920921	0.680313
537	1-(1-enyl-stearoyl)-GPE (P-18:0)*	434	TRUE	-0.368579	0.0845259	0.12593	0.439819	-0.0237712	0.0123647	-0.0127994	-3.95566	1.6053	0.307406	0.483658	0.411156	3.97389e-06	0.930634	0.16598	0.0775935	0.179609	0.541833	0.920921	0.782237
494	linoleoylcarnitine (C18:2)*	434	TRUE	0.38193	-0.0881604	0.115515	0.744839	-0.246649	-0.00923342	-0.015079	-9.41641	-2.52768	0.249887	0.426749	0.412125	1.92192e-17	0.325809	0.260433	0.0237025	0.00051021	0.296021	0.920921	0.762442
194	gamma-glutamyltyrosine	434	TRUE	-1.59757	0.144996	-0.113081	0.691491	0.0680431	0.00426662	0.0336419	-2.30804	2.57784	1.0692e-06	0.185194	0.415757	1.27338e-15	0.783502	0.598128	3.13541e-07	0.387901	0.28003	0.920921	0.580187
261	N-acetyltryptophan	434	TRUE	-1.02667	0.11136	-0.108714	0.506005	0.00700359	0.00945189	0.0153725	-0.318313	-4.69883	0.00120581	0.293345	0.419132	1.51194e-09	0.976702	0.227891	0.0157932	0.902132	0.0420163	0.920921	0.687613
528	pseudouridine	434	TRUE	-0.908761	0.212808	0.113715	0.465415	-0.124204	0.00976571	0.00297601	14.7379	-0.877535	0.00622194	0.0552243	0.419776	1.11742e-07	0.62099	0.234281	0.655526	5.46432e-08	0.71695	0.920921	0.355978
552	1-stearoyl-2-oleoyl-GPI (18:0/18:1)*	434	TRUE	-0.418818	0.36313	0.12103	-0.369558	0.0645337	0.0367893	-0.0275479	8.06278	3.84028	0.237476	0.00217718	0.421088	7.88844e-05	0.809789	2.69244e-05	0.00010934	0.0053354	0.137158	0.920921	0.100885
786	4-ethylcatechol sulfate	434	TRUE	0.748214	0.0409045	-0.121343	-0.090532	0.551336	-0.00277822	-0.0266558	11.4637	-5.70666	0.0356458	0.731073	0.421976	0.335668	0.0406438	0.752305	0.000193938	8.0323e-05	0.0278807	0.920921	0.926508
47	1-(1-enyl-oleoyl)-GPC (P-18:1)*	434	TRUE	0.733914	0.113907	0.11669	0.28047	-0.303337	0.00573372	-0.0420251	-0.962013	1.19141	0.0324689	0.3206	0.422926	0.0019665	0.242472	0.499086	1.07805e-09	0.731283	0.633775	0.920921	0.695766
738	6-oxopiperidine-2-carboxylate	434	TRUE	-1.28512	0.192179	-0.122367	0.255931	-0.089474	0.0065083	0.0309059	-1.64237	5.24631	0.00035803	0.110225	0.423162	0.00710172	0.742456	0.46461	1.92065e-05	0.576292	0.0455493	0.920921	0.47711
605	pregnenetriol disulfate*	434	TRUE	0.418389	0.266781	-0.105264	0.774589	-0.85051	-0.0238374	0.0150222	-10.164	-2.30468	0.1789	0.0103261	0.425453	4.31601e-21	0.000302458	0.00194705	0.0162608	6.32548e-05	0.309595	0.920921	0.222354
87	3-hydroxy-2-ethylpropionate	434	TRUE	-1.01307	0.119562	0.117715	0.636199	0.0743306	0.0151984	0.00234849	7.85938	-2.0932	0.00362884	0.3043	0.425717	4.57811e-12	0.77778	0.0774944	0.737063	0.00570095	0.409512	0.920921	0.695477
411	isobutyrylglycine	434	TRUE	-0.549741	-0.0440558	-0.115095	0.11836	-0.566403	0.0274136	-0.0183106	5.57941	-2.20664	0.1066	0.698779	0.425916	0.188243	0.0279141	0.00113234	0.00744696	0.0448192	0.374078	0.920921	0.9074
692	decanoylcarnitine (C10)	434	TRUE	0.677919	-0.103509	0.124163	0.242605	-0.466611	0.001057	-0.0307545	-8.10404	7.32574	0.0654904	0.400038	0.426591	0.0125462	0.0936539	0.907507	3.17504e-05	0.00698762	0.00630661	0.920921	0.752308
704	1-palmityl-2-arachidonoyl-GPC (O-16:0/20:4)*	434	TRUE	-0.152289	-0.0417688	-0.121018	0.626307	-0.185823	0.00122397	0.000681684	-0.376877	4.14941	0.671573	0.727854	0.427169	4.00481e-11	0.493902	0.890351	0.924713	0.897719	0.112891	0.920921	0.923736
811	2-naphthol sulfate	434	TRUE	-0.722903	0.0425941	0.114994	0.123952	0.327489	-0.0140123	0.0403473	1.65515	2.80064	0.0341731	0.708823	0.42718	0.169007	0.204515	0.0967344	3.95691e-09	0.552454	0.260148	0.920921	0.915138
685	docosapentaenoate (n3 DPA; 22:5n3)	434	TRUE	-0.343874	-0.175901	0.120385	0.00141422	0.130468	0.00630032	-0.00394351	-3.11833	1.61865	0.337438	0.142024	0.428696	0.988079	0.630336	0.477081	0.583879	0.286585	0.535506	0.920921	0.513117
668	hydroxypalmitoyl sphingomyelin (d18:1/16:0(OH))**	434	TRUE	0.0478903	0.174917	0.116128	0.00652345	-1.18473	0.00582101	-0.0154159	-4.7307	1.54932	0.8903	0.131695	0.430577	0.943276	6.426e-06	0.497629	0.0270612	0.0950985	0.540325	0.920921	0.5054
260	1-stearoyl-2-linoleoyl-GPC (18:0/18:2)*	434	TRUE	-0.206134	0.324694	-0.122576	-0.127112	-0.350882	0.0165454	-0.0158834	0.409547	-1.80779	0.573854	0.00803034	0.430618	0.189049	0.20556	0.0678237	0.0309546	0.891123	0.498516	0.920921	0.199866
79	retinol (Vitamin A)	434	TRUE	-1.10573	0.0998935	-0.118441	0.656556	0.362166	0.0314236	-0.0111741	5.97128	0.332175	0.00187147	0.400503	0.43241	2.68061e-12	0.177999	0.000349557	0.117624	0.0396437	0.897985	0.920921	0.752308
587	N-palmitoyl-sphingosine (d18:1/16:0)	434	TRUE	-1.39784	0.278032	-0.13199	0.34622	-0.223994	0.0300708	0.00286185	-2.38268	0.0494875	0.000422097	0.035856	0.432677	0.000941616	0.454991	0.00215084	0.719276	0.461566	0.986333	0.920921	0.300873
640	ornithine	434	TRUE	0.118071	0.136956	-0.123057	0.618285	-0.319469	-0.00460465	-0.0165859	1.1327	-0.750895	0.74954	0.267818	0.432953	2.43037e-10	0.253359	0.614482	0.0255542	0.707514	0.780539	0.920921	0.667515
768	7-methylxanthine	434	TRUE	-0.00389419	-0.00101601	-0.118981	-0.16708	-0.11912	0.00469467	-0.00494094	16.3502	-0.109626	0.991318	0.993222	0.433314	0.0770339	0.65983	0.595619	0.491806	2.18074e-08	0.966469	0.920921	0.997683
330	vanillactate	434	TRUE	-0.643994	0.136498	-0.118806	0.363835	-0.33139	0.00259778	0.00629155	2.89141	5.06242	0.0715377	0.253059	0.433342	0.000115346	0.220117	0.768695	0.380709	0.321594	0.0518989	0.920921	0.663009
662	thymol sulfate	434	TRUE	-0.492495	-0.0729119	-0.11211	0.437857	-0.392683	0.00189392	0.0139159	3.90601	5.80515	0.144338	0.517815	0.433532	8.86091e-07	0.123765	0.820335	0.0399916	0.156078	0.0182089	0.920921	0.806791
874	glycochenodeoxycholate glucuronide (1)	434	TRUE	0.14146	-0.0995903	-0.126161	0.237845	0.177526	-0.00389606	0.00503857	-1.49173	1.11554	0.709566	0.43268	0.433738	0.0177112	0.536538	0.678155	0.508923	0.630415	0.686914	0.920921	0.763123
7	X - 24243	434	TRUE	-0.549136	0.0819116	-0.116452	0.349646	-0.0758227	0.0137478	-0.00194021	-8.64808	-6.75255	0.120102	0.487812	0.43726	0.000178105	0.776565	0.115422	0.78451	0.00271031	0.00871839	0.921259	0.78753
848	tartronate (hydroxymalonate)	434	TRUE	0.543395	-0.00341374	-0.118646	-0.0718854	-1.03418	0.0190645	-0.041785	1.4297	1.41813	0.131389	0.977374	0.437568	0.449736	0.00014661	0.0322488	7.63771e-09	0.626774	0.58899	0.921259	0.995145
505	N1-Methyl-2-pyridone-5-carboxamide	434	TRUE	-1.34588	0.160791	0.110231	0.570057	-0.484091	0.00231532	0.0301565	5.73203	-0.620969	5.90283e-05	0.151016	0.43816	1.16937e-10	0.056078	0.779826	7.42188e-06	0.0361078	0.79925	0.921259	0.529497
830	tyramine O-sulfate	434	TRUE	-1.00567	0.33525	-0.110621	0.061843	0.0970239	0.0104321	0.0148108	-2.12976	-3.16025	0.00296858	0.00304005	0.441196	0.488984	0.704671	0.212469	0.0293623	0.440833	0.200131	0.921259	0.100885
149	3-indoleglyoxylic acid	434	TRUE	0.246825	0.126809	-0.119775	0.588077	0.146557	0.00247959	-0.0216517	10.6307	0.973174	0.501238	0.301161	0.441809	1.29007e-09	0.597459	0.784597	0.00330875	0.000387294	0.715942	0.921259	0.695477
459	3-amino-2-piperidone	434	TRUE	-0.655036	0.127435	-0.116092	0.448372	0.209729	0.00974446	-0.00961575	6.82173	3.14586	0.0661258	0.284729	0.442771	1.90082e-06	0.436567	0.268767	0.179232	0.0190567	0.225874	0.921259	0.680313
343	gamma-glutamyl-epsilon-lysine	434	TRUE	-0.132914	-0.0159839	0.130048	0.223539	-0.509593	-0.0184657	0.0226493	5.27574	-6.25838	0.73937	0.904705	0.442993	0.0340838	0.0916638	0.0614994	0.00476106	0.105715	0.03158	0.921259	0.974473
814	X - 21829	434	TRUE	-1.29579	-0.0134599	-0.116562	0.13604	0.0635396	0.0106787	0.0229908	-6.11689	-1.89696	0.00030674	0.910669	0.444144	0.151234	0.814948	0.228812	0.00142877	0.0368504	0.468367	0.921259	0.974473
891	linoleate (18:2n6)	434	TRUE	0.430616	-0.353299	0.113533	-0.320757	0.241982	-0.0188855	0.0103118	-8.15664	-1.47822	0.218811	0.00253588	0.44482	0.0005223	0.36084	0.0291227	0.142592	0.00432375	0.562395	0.921259	0.100885
92	N,N-dimethylalanine	434	TRUE	0.691368	-0.000378003	-0.126051	0.25517	-0.284365	-0.00895089	-0.0172637	-1.91868	-3.17456	0.0755802	0.99768	0.445156	0.0129988	0.333817	0.352009	0.0271557	0.545761	0.262854	0.921259	0.997683
663	lactosyl-N-palmitoyl-sphingosine (d18:1/16:0)	434	TRUE	0.652339	0.132797	0.109409	-0.0322053	-0.454899	0.00140232	-0.018178	9.79944	-0.721958	0.0539237	0.240344	0.446147	0.718562	0.0755135	0.866878	0.00748845	0.000389503	0.769728	0.921259	0.65223
782	2-myristoyl-GPC (14:0)*	434	TRUE	-1.09002	0.146653	0.114056	-0.172894	0.313601	0.0336685	-0.00310067	12.2358	-1.22161	0.0020349	0.214214	0.446786	0.0638433	0.240517	0.000115662	0.662139	2.20961e-05	0.635162	0.921259	0.619147
304	cholesterol	434	TRUE	-1.29589	0.309561	-0.125467	0.325648	-0.753335	0.0324623	-0.00320959	0.414781	3.01168	0.000908896	0.0177275	0.449092	0.00159336	0.0107709	0.000774223	0.682473	0.896506	0.290071	0.921259	0.256191
19	X - 16938	434	TRUE	0.268322	0.0138833	-0.119504	0.297923	-0.524675	-0.00511906	-0.0107659	-3.8321	-2.82742	0.470828	0.911099	0.449096	0.00242601	0.0622329	0.577811	0.149678	0.207055	0.297047	0.921259	0.974473
457	2-linoleoyl-GPE (18:2)*	434	TRUE	-0.0379181	0.0912129	-0.118593	0.100747	0.507179	0.0105842	-0.0156507	1.84023	-5.0068	0.918508	0.46144	0.450764	0.303223	0.0703521	0.247931	0.035494	0.542987	0.0637497	0.921259	0.774427
175	N-acetyl-isoputreanine	434	TRUE	0.290653	0.147857	0.114588	0.0246149	-0.298059	0.0127645	-0.0346142	7.77096	4.07896	0.417235	0.216871	0.45101	0.794716	0.271309	0.149499	1.50665e-06	0.007882	0.118218	0.921259	0.62281
207	1-(1-enyl-stearoyl)-2-docosapentaenoyl-GPE (P-18:0/22:5n3)*	434	TRUE	-0.894517	0.248758	0.12088	0.440695	-0.235365	0.0254357	-0.0112182	-0.448729	7.35332	0.0180405	0.0490828	0.451376	1.02267e-05	0.410628	0.00652088	0.139766	0.884452	0.00763778	0.921259	0.340916
234	sphingomyelin (d18:1/14:0, d16:1/16:0)*	434	TRUE	-2.06483	0.195103	0.113452	-0.126102	-0.465777	0.0456463	0.0102448	6.88572	0.996562	6.92276e-09	0.101444	0.453188	0.180298	0.0840014	2.21003e-07	0.152409	0.0179549	0.701225	0.922856	0.45025
202	X - 21470	434	TRUE	0.892414	0.0611102	-0.101559	0.454641	-0.412464	-0.0251633	0.00801372	-8.40204	-1.40219	0.0053042	0.567809	0.454621	7.48362e-08	0.0883961	0.00147117	0.212565	0.00130157	0.547749	0.923675	0.827579
581	palmitoylcholine	434	TRUE	-0.0512393	0.101235	-0.115994	0.0686555	-0.494398	0.0198678	-0.0306377	3.80864	3.19415	0.888864	0.408703	0.455947	0.478244	0.0745907	0.0283738	3.17703e-05	0.203196	0.231917	0.924272	0.754456
324	1-palmitoleoyl-2-linolenoyl-GPC (16:1/18:3)*	434	TRUE	-0.276185	0.28558	-0.117577	-0.477535	-0.0812623	0.0183643	-0.00802278	6.89467	-4.41279	0.459234	0.0220195	0.457752	1.25662e-06	0.773379	0.0464906	0.284407	0.0236076	0.10464	0.924464	0.290139
374	gamma-glutamyl-alpha-lysine	434	TRUE	-0.88344	0.0154686	-0.111277	0.791811	-0.666127	-0.00451342	0.0206939	-4.13778	-5.34333	0.0132956	0.89679	0.462381	4.32082e-17	0.0135685	0.608859	0.00388278	0.155445	0.0398896	0.924464	0.974473
673	X - 21286	434	TRUE	0.125802	0.0674	-0.110256	-0.0965692	-0.140635	-0.0082675	0.0014729	3.73353	-2.76456	0.722265	0.568789	0.462859	0.301451	0.599288	0.344662	0.83585	0.196262	0.283774	0.924464	0.827579
96	1,3-dimethylurate	434	TRUE	-0.771288	0.0175615	-0.111224	-0.0992736	0.109405	0.018331	0.00130725	12.018	-2.65278	0.0315261	0.883517	0.464897	0.294533	0.686694	0.0386782	0.855997	4.047e-05	0.31013	0.924464	0.974473
291	acetylcarnitine (C2)	434	TRUE	-0.449386	-0.0470481	0.110541	0.369508	-0.0138055	0.000967491	0.00173079	-8.44971	-4.09868	0.207825	0.693135	0.465274	8.76692e-05	0.959192	0.912642	0.809131	0.00371505	0.114911	0.924464	0.905319
210	2,3-dihydroxyisovalerate	434	TRUE	-0.214473	-0.0026212	-0.106786	0.242596	0.178872	0.0127904	-0.0173578	4.81002	6.03009	0.534191	0.981863	0.465747	0.00774573	0.492997	0.133677	0.0122465	0.0876547	0.0164663	0.924464	0.995439
162	3-hydroxydecanoate	434	TRUE	0.586156	-0.241077	0.120491	-0.113777	0.119066	-0.00872468	-0.00924676	-9.09646	2.23528	0.132469	0.0640916	0.466108	0.268741	0.686137	0.364975	0.237328	0.00423384	0.431107	0.924464	0.381313
284	cerotoylcarnitine (C26)*	434	TRUE	-1.31373	0.176067	0.104903	0.849561	-0.0695468	0.0368271	-0.0196509	-4.5175	1.29209	0.000108258	0.120529	0.466289	2.5089e-21	0.78639	1.13156e-05	0.0039354	0.102924	0.601317	0.924464	0.500507
103	1-stearoyl-2-arachidonoyl-GPI (18:0/20:4)	434	TRUE	-1.54542	0.250546	0.111028	0.142116	0.245474	0.0387595	-0.00353969	-3.25416	-0.776512	1.74619e-05	0.0371892	0.467086	0.134684	0.36698	1.31256e-05	0.624253	0.267874	0.76711	0.924464	0.300873
144	X - 21607	434	TRUE	0.6855	-0.210964	-0.112826	0.159674	-0.428648	-0.0116844	-0.0108427	-9.43199	2.51406	0.0633593	0.0872989	0.471411	0.101444	0.12473	0.200436	0.143676	0.00175035	0.350081	0.924464	0.420537
190	X - 11478	434	TRUE	0.674082	-0.100226	-0.101915	-0.0203313	0.329865	-0.0301462	0.0176985	-6.07183	-6.80186	0.0432804	0.368552	0.471455	0.817425	0.19095	0.000255665	0.00824045	0.0257375	0.00513399	0.924464	0.728968
441	hypotaurine	434	TRUE	0.975292	-0.154981	0.1137	0.0932106	-0.00454852	-0.0129463	-0.0239034	3.41622	0.948315	0.00877802	0.212722	0.471524	0.342856	0.987106	0.159335	0.00138393	0.260789	0.726584	0.924464	0.618158
187	oleoyl-arachidonoyl-glycerol (18:1/20:4) [1]*	434	TRUE	-1.73812	-0.0022238	0.104468	0.401519	0.356518	0.0254508	0.022119	0.639983	6.07008	3.87696e-07	0.984499	0.47223	8.99656e-06	0.168669	0.00264444	0.00130152	0.818933	0.0150096	0.924464	0.996683
538	X - 15469	434	TRUE	0.850274	-0.255289	0.111108	0.56805	-0.365912	-0.00328681	-0.0335829	-5.29479	3.63484	0.0197531	0.0362355	0.472845	3.68154e-09	0.184677	0.715457	4.55884e-06	0.0753611	0.17148	0.924464	0.300873
728	sphingomyelin (d18:2/24:2)*	434	TRUE	0.0780433	0.0154066	-0.0975138	-0.339535	-1.04759	-0.0188719	0.0298322	-6.13129	-0.155972	0.808718	0.886287	0.475937	6.64259e-05	1.73176e-05	0.0178739	4.07567e-06	0.0198109	0.947066	0.924464	0.974473
483	1-(1-enyl-palmitoyl)-2-palmitoleoyl-GPC (P-16:0/16:1)*	434	TRUE	1.56306	0.0595425	-0.101224	-0.47444	-0.676082	-0.00622226	-0.039318	5.25327	4.09284	3.2514e-06	0.595736	0.477491	8.7779e-08	0.00776631	0.45352	5.56404e-09	0.0553247	0.0944402	0.924464	0.846652
727	oleoyl-oleoyl-glycerol (18:1/18:1) [1]*	434	TRUE	-2.33007	0.0131657	0.109873	0.41037	0.414489	0.0378499	0.0265048	4.7842	-5.0389	1.7654e-10	0.91409	0.478287	2.08258e-05	0.133391	2.75207e-05	0.000301754	0.108509	0.0582907	0.924464	0.975029
184	X - 17690	434	TRUE	-0.016873	-0.0423181	0.108211	0.471024	-0.445818	-0.00996183	0.0125034	10.3586	2.06057	0.962617	0.725024	0.478701	7.2247e-07	0.101515	0.262937	0.0837518	0.000423509	0.43218	0.924464	0.921448
276	octanoylcarnitine (C8)	434	TRUE	0.491224	-0.131942	0.108319	0.241618	-0.381714	-0.001061	-0.0228192	-9.90465	5.68516	0.173275	0.27373	0.479148	0.0111893	0.161732	0.905282	0.00163422	0.000768974	0.0305596	0.924464	0.674657
466	metabolonic lactone sulfate	434	TRUE	-2.21944	-0.158295	0.0932466	0.379084	0.0852545	0.00268694	0.0706316	6.42644	-7.95462	9.02765e-13	0.127307	0.479309	3.80765e-06	0.716676	0.726396	1.03287e-29	0.0112659	0.000441461	0.924464	0.505001
280	adipoylcarnitine (C6-DC)	434	TRUE	-0.832952	0.103258	0.1044	0.353674	0.172115	0.00570081	0.00677795	-0.72279	-4.40595	0.0166772	0.374558	0.479516	0.000118428	0.51307	0.507464	0.332114	0.799134	0.0822849	0.924464	0.731366
516	eicosenoylcarnitine (C20:1)*	434	TRUE	-0.357916	0.0862475	0.0957903	0.682817	-0.119031	0.033566	-0.0512907	-5.0418	-0.740576	0.263256	0.419844	0.480421	6.3172e-16	0.622734	2.19092e-05	1.43441e-15	0.0535328	0.750744	0.924464	0.758621
139	arachidonoylcholine	434	TRUE	-0.148345	0.0382415	-0.110173	0.159757	-0.431696	0.0187464	-0.02692	3.30915	5.5416	0.687359	0.756225	0.481188	0.100714	0.121468	0.0396432	0.000276589	0.271426	0.0391074	0.924464	0.929496
471	sebacate (C10-DC)	434	TRUE	0.178433	-0.00827494	0.108209	-0.0360713	0.0163515	0.00725403	-0.0200332	-3.24048	-5.14445	0.622731	0.945567	0.481963	0.706417	0.95246	0.418419	0.00595389	0.2737	0.0515905	0.924464	0.983795
159	gamma-glutamylleucine	434	TRUE	-1.6649	-0.078425	0.0890519	1.20671	0.185585	-0.00474108	0.0441581	-3.93421	-2.02387	2.62341e-08	0.432804	0.482999	1.11343e-52	0.412066	0.521456	1.99587e-13	0.107186	0.353242	0.924464	0.763123
870	octadecenedioylcarnitine (C18:1-DC)*	434	TRUE	0.423184	-0.104784	0.105567	0.405281	0.161159	-8.12928e-06	-0.0236618	-1.86975	1.73429	0.234051	0.377935	0.484176	1.58782e-05	0.549003	0.999262	0.000923183	0.519505	0.503344	0.924464	0.731383
302	gamma-glutamylvaline	434	TRUE	-2.16498	0.204642	-0.0976528	0.967228	-0.00976074	0.00323606	0.050872	-12.8225	-3.23434	5.57193e-11	0.0637348	0.485937	1.3912e-28	0.968828	0.69183	1.73349e-14	1.97475e-06	0.179009	0.924464	0.381313
395	phenol sulfate	434	TRUE	-0.570473	0.134768	0.10522	0.200121	0.0804017	0.0126402	-0.00216986	-1.11215	-1.25085	0.109214	0.257512	0.486273	0.0333362	0.765311	0.151062	0.761625	0.702058	0.629837	0.924464	0.663009
29	3-hydroxypyridine sulfate	434	TRUE	-0.238018	0.0710454	-0.10618	0.235199	0.131402	0.0148166	-0.0214651	12.9969	-2.64177	0.508233	0.55457	0.486708	0.0132881	0.629113	0.0956846	0.00297058	9.61226e-06	0.313609	0.924464	0.827114
629	3-carboxy-4-methyl-5-pentyl-2-furanpropionate (3-CMPFP)**	434	TRUE	-0.622535	0.118352	-0.0970945	0.37147	-0.0300839	0.0108953	-0.00508023	2.33676	-3.94731	0.0593186	0.283348	0.488201	2.02834e-05	0.904081	0.181797	0.443523	0.385837	0.100816	0.924464	0.680313
279	adenosine	434	TRUE	0.272624	0.0214876	0.110164	0.0720133	0.109996	-0.0141055	0.0063325	-4.12114	-0.924474	0.467494	0.86394	0.488987	0.467316	0.698282	0.128303	0.400737	0.17846	0.735285	0.924464	0.966405
206	X - 18899	434	TRUE	1.08278	-0.0907055	-0.108214	0.294674	0.198076	-0.00638682	-0.0310409	-0.0340905	-0.057781	0.00331181	0.461558	0.489058	0.00246709	0.477388	0.48336	2.75782e-05	0.990961	0.982839	0.924464	0.774427
447	X - 21448	434	TRUE	0.258956	-0.137945	0.106875	0.481548	-0.068822	0.00708015	-0.0273684	-0.813346	-3.37928	0.478177	0.258248	0.490293	5.88509e-07	0.803167	0.43275	0.000189794	0.78493	0.204051	0.924847	0.663009
256	imidazole propionate	434	TRUE	-0.383996	0.0278699	-0.0985462	0.365128	0.178174	-0.00166746	0.00769677	-7.30511	2.16586	0.255466	0.804928	0.491592	4.21866e-05	0.485345	0.841658	0.256413	0.00804298	0.378757	0.92535	0.953114
674	X - 16935	434	TRUE	0.283082	-0.361803	-0.0905816	0.217937	-0.0370433	-0.0228929	0.0246178	-19.4095	-0.619482	0.364321	0.000521501	0.49391	0.00816835	0.875266	0.00299796	8.56423e-05	2.53903e-14	0.785295	0.926146	0.0583546
743	1-palmitoyl-2-adrenoyl-GPC (16:0/22:4)*	434	TRUE	-1.17188	-0.0186737	-0.101852	0.124714	0.262086	0.0175577	0.0208612	5.88749	3.18117	0.0008423	0.873519	0.494083	0.178436	0.323488	0.0430141	0.0030853	0.0399022	0.213623	0.926146	0.972766
353	X - 23997	434	TRUE	0.754891	0.056984	0.114533	-0.0675949	0.33555	-0.00234364	-0.0306143	15.8526	-2.32143	0.058046	0.668557	0.497953	0.520383	0.265256	0.811838	0.000129594	1.08238e-06	0.423798	0.927711	0.886134
371	5alpha-androstan-3beta,17beta-diol monosulfate (2)	434	TRUE	0.352454	-0.12232	-0.092872	0.826245	0.0115488	-0.0204625	0.00839815	-2.62179	-6.3354	0.276321	0.258247	0.499019	4.2388e-22	0.962379	0.0105608	0.196512	0.321172	0.00724613	0.927711	0.663009
42	sphingomyelin (d18:0/20:0, d16:0/22:0)*	434	TRUE	-2.36044	0.271724	0.100688	0.0373331	-0.21747	0.0335609	0.0388727	1.2175	-3.08451	1.87355e-11	0.0207054	0.499602	0.687491	0.413272	0.000112084	3.65717e-08	0.671312	0.228487	0.927711	0.276897
145	ascorbic acid 3-sulfate*	434	TRUE	-0.0828686	0.166251	0.102566	0.369282	-0.711047	0.00753957	-0.0211416	14.89	2.02187	0.817587	0.166156	0.501085	9.91534e-05	0.00887056	0.3959	0.00339065	3.83165e-07	0.439962	0.927711	0.563924
784	laurylcarnitine (C12)	434	TRUE	0.72928	-0.170155	0.106406	0.398685	-0.367056	-0.00336184	-0.0295736	-5.10936	5.29719	0.0523855	0.175597	0.504727	5.90571e-05	0.196656	0.71751	8.96522e-05	0.0959045	0.0531503	0.927711	0.567995
213	C-glycosyltryptophan	434	TRUE	-1.85177	0.07979	0.101607	-0.0302722	-0.0847023	0.0147988	0.0344942	6.32598	-2.4218	2.56354e-07	0.506425	0.505182	0.749697	0.755282	0.0957085	1.75817e-06	0.0310391	0.355058	0.927711	0.801691
9	N-acetylaspartate (NAA)	434	TRUE	0.56335	0.257306	0.106686	-0.242874	-0.655597	0.00748231	-0.0333357	4.76681	5.6759	0.136044	0.041611	0.505852	0.0149343	0.021792	0.423139	1.12268e-05	0.122287	0.039298	0.927711	0.305869
168	2-aminooctanoate	434	TRUE	0.784642	0.0358993	-0.0935024	0.382466	0.012149	-0.00311486	-0.031821	0.9873	0.748844	0.0178678	0.74575	0.505968	1.2304e-05	0.961325	0.703679	1.73256e-06	0.715054	0.756425	0.927711	0.928248
488	1-palmitoyl-2-docosahexaenoyl-GPC (16:0/22:6)	434	TRUE	-0.213078	0.118742	0.0991076	0.061332	-0.202849	0.0335511	-0.042491	-7.51675	2.81257	0.544081	0.311714	0.506055	0.508404	0.445052	0.000111328	1.70644e-09	0.00874764	0.27182	0.927711	0.695477
290	palmitoyl dihydrosphingomyelin (d18:0/16:0)*	434	TRUE	-0.325381	0.354133	-0.0982391	-0.225607	-0.710858	0.022663	-0.0180341	0.428511	2.57351	0.35046	0.00235894	0.506455	0.0142126	0.0069888	0.00851437	0.00997509	0.88026	0.310861	0.927711	0.100885
292	citrulline	434	TRUE	0.00408961	0.0948924	-0.0982735	0.427005	0.0541911	0.0172039	-0.0401132	5.64143	1.21401	0.990641	0.415397	0.50651	3.51164e-06	0.837157	0.0459066	1.01266e-08	0.0474516	0.632769	0.927711	0.758036
34	nonadecanoate (19:0)	434	TRUE	-0.332697	-0.186021	0.101265	0.0539423	0.173341	0.0210252	-0.0202725	-1.28629	-1.5807	0.355362	0.122016	0.507342	0.570353	0.524279	0.0181295	0.00504548	0.66156	0.546773	0.927711	0.501496
199	lactate	434	TRUE	-0.639555	-0.0677802	-0.10247	0.199271	0.396063	0.0116689	0.00748719	-4.11573	-5.5276	0.0820255	0.581283	0.511401	0.0401569	0.154416	0.199266	0.310728	0.170369	0.0391492	0.932446	0.837346
840	N-acetylglutamine	434	TRUE	-0.107272	0.149496	-0.0914088	0.218968	0.148021	0.0109985	-0.0201935	9.35778	11.9269	0.744037	0.173315	0.512013	0.0115971	0.551327	0.175627	0.00221044	0.000484156	6.29886e-07	0.932446	0.565738
478	behenoyl dihydrosphingomyelin (d18:0/22:0)*	434	TRUE	-2.39069	0.263279	0.100167	0.164449	-0.193096	0.025872	0.0481857	-2.60006	-4.56148	4.17093e-11	0.0296848	0.514724	0.0856422	0.481004	0.00386918	3.55678e-11	0.379359	0.0840673	0.935207	0.300873
843	oleoylcholine	434	TRUE	-0.0168959	0.123121	-0.0988336	0.0574757	-0.377485	0.0246445	-0.0384563	4.63855	4.32288	0.962562	0.306065	0.517578	0.545363	0.165527	0.00560901	1.04078e-07	0.114413	0.0993461	0.935207	0.695477
875	16a-hydroxy DHEA 3-sulfate	434	TRUE	0.782956	0.0501019	0.085476	0.472354	-0.622225	-0.0288827	0.0134608	-6.40555	0.297325	0.0119179	0.630161	0.517656	9.17067e-09	0.00822939	0.000174932	0.0313553	0.011727	0.895744	0.935207	0.864662
737	1-stearoyl-2-arachidonoyl-GPC (18:0/20:4)	434	TRUE	-0.929848	-0.086792	-0.100934	0.237381	0.034005	0.01574	0.00644265	0.042621	9.30175	0.0115476	0.480534	0.518203	0.0146078	0.902789	0.0836972	0.383572	0.988684	0.000525946	0.935207	0.780835
200	fructose	434	TRUE	-1.37178	0.210349	-0.0959985	0.043641	-0.0625547	0.0319021	0.00268624	1.4431	2.86279	0.000105715	0.0752373	0.522541	0.640402	0.815148	0.000264562	0.705412	0.617309	0.26685	0.935207	0.398891
711	lysine	434	TRUE	-0.720243	0.0889614	0.100375	0.595167	-0.713253	-0.00662939	0.0194653	-9.31119	-2.67743	0.0515791	0.471841	0.522594	1.11416e-09	0.0107992	0.468532	0.00880574	0.00204932	0.320688	0.935207	0.779896
409	2-oleoyl-GPE (18:1)*	434	TRUE	-0.177031	0.13452	-0.106841	0.126829	0.559199	0.0219388	-0.026618	5.35696	1.83743	0.653275	0.307047	0.522866	0.2229	0.0606048	0.0243109	0.00077077	0.0958563	0.522283	0.935207	0.695477
117	X - 22789	434	TRUE	0.944573	-0.261551	-0.100146	0.0222643	-0.101962	-0.0179495	-0.00946028	-10.3838	0.132996	0.0108918	0.0348835	0.524649	0.820197	0.716277	0.0502981	0.204186	0.000605823	0.960763	0.935207	0.300873
504	ribonate	434	TRUE	-1.15585	0.149112	-0.102285	0.209919	-0.132892	0.0221807	0.00116515	4.72416	-0.228358	0.00239895	0.241226	0.526649	0.0367896	0.644407	0.0184313	0.878893	0.128497	0.934403	0.935207	0.65223
46	isoleucine	434	TRUE	-1.10092	-0.120406	0.0809497	1.02723	0.0291795	-0.0110618	0.0405297	-9.88119	-0.437854	0.000280835	0.234531	0.529058	1.03221e-37	0.898697	0.139804	2.77103e-11	6.49781e-05	0.842851	0.935207	0.64858
5	tryptophan	434	TRUE	0.138757	-0.0694306	0.0886722	0.672146	-0.2673	-0.00513383	-0.00332606	-2.2786	1.6826	0.676215	0.531754	0.52936	1.83323e-14	0.287392	0.53189	0.618163	0.400807	0.487071	0.935207	0.813058
573	X - 22162	434	TRUE	0.926262	0.161581	0.0931353	-0.0686097	0.254499	-0.00712155	-0.0311519	18.4334	-2.84257	0.00817791	0.16743	0.53086	0.45815	0.336621	0.410736	9.48299e-06	1.13633e-10	0.265384	0.935207	0.563975
266	X - 11444	434	TRUE	-1.76574	-0.26565	-0.0971766	1.14311	-0.510254	0.0156636	0.0245513	5.75275	-3.60606	1.36534e-06	0.0296721	0.531014	2.35971e-32	0.0649419	0.083027	0.000826175	0.0538817	0.175854	0.935207	0.300873
30	1-myristoyl-2-docosahexaenoyl-GPC (14:0/22:6)*	434	TRUE	-0.974778	0.207142	0.0942038	-0.397252	-0.0746727	0.041782	-0.0181137	3.6879	2.00336	0.00595217	0.0803005	0.531037	2.1854e-05	0.780544	1.84795e-06	0.0109343	0.20239	0.437925	0.935207	0.404876
74	1-myristoyl-2-linoleoyl-GPC (14:0/18:2)*	434	TRUE	-1.09391	0.116434	0.0921353	-0.62229	0.0507235	0.0204151	0.024878	5.85399	-6.2726	0.00170376	0.317641	0.533421	1.38291e-11	0.847444	0.0178424	0.000381078	0.039692	0.0135533	0.935207	0.695766
815	vanillylmandelate (VMA)	434	TRUE	-1.08746	-0.033495	-0.0880902	0.12077	-0.327126	0.0269717	-0.0143029	4.77171	2.34985	0.00111353	0.763809	0.533688	0.170306	0.194692	0.00107072	0.0327595	0.0796872	0.333674	0.935207	0.931119
838	1-methylxanthine	434	TRUE	-0.253236	-0.0809518	-0.0944073	0.0438919	-0.134274	0.0189548	-0.0167599	13.95	-0.5938	0.480397	0.499663	0.535261	0.643209	0.620759	0.0326099	0.0200501	1.91467e-06	0.820369	0.935207	0.797201
702	1-docosahexaenoyl-GPE (22:6)*	434	TRUE	-0.310049	0.158847	0.0930601	-0.134526	0.245353	0.0360118	-0.041781	-7.90364	0.904858	0.380818	0.179083	0.535306	0.149831	0.359105	3.82035e-05	4.09491e-09	0.00620232	0.725596	0.935207	0.572416
544	N-stearoyl-sphingosine (d18:1/18:0)*	434	TRUE	-2.29214	0.300213	0.0964492	0.24846	0.137438	0.0218508	0.0429234	-5.19423	-3.13502	4.10312e-10	0.0143027	0.53539	0.0102931	0.620207	0.0159341	5.62212e-09	0.0827217	0.240761	0.935207	0.241797
269	N-acetylalanine	434	TRUE	-1.35104	0.0864804	0.0925413	0.443835	-0.378582	0.00540503	0.0264835	2.36603	4.28666	0.00012472	0.462409	0.535692	1.81093e-06	0.155131	0.534625	0.000180623	0.410435	0.0948176	0.935207	0.774427
246	X - 13728	434	TRUE	-0.458951	0.0512832	-0.0934363	-0.144717	-0.338066	0.00632419	0.00859588	16.8962	-1.35433	0.19777	0.666727	0.53661	0.124036	0.209659	0.472768	0.229722	6.2973e-09	0.601982	0.935207	0.886134
381	X - 14939	434	TRUE	0.744454	-0.0870992	0.0915202	0.207161	0.0332282	-0.0240746	0.00601131	-11.1062	-0.929208	0.0335275	0.456748	0.537977	0.0250738	0.900157	0.00541849	0.392744	0.000102324	0.71578	0.935207	0.774427
183	gentisate	434	TRUE	0.529132	-0.00278405	-0.0948434	-0.0938672	0.294306	0.00705632	-0.0277934	3.76568	5.68102	0.1451	0.981698	0.538223	0.327613	0.283874	0.431813	0.000138551	0.203965	0.0318113	0.935207	0.995439
835	X - 17340	434	TRUE	-1.49663	-0.0301404	0.0898876	0.90451	-0.451908	0.000481781	0.038362	0.735305	-0.78704	1.5189e-05	0.794328	0.540329	4.09625e-23	0.0841196	0.955073	3.37001e-08	0.794576	0.754901	0.935207	0.951494
242	1-oleoyl-GPC (18:1)	434	TRUE	0.930592	0.112567	-0.0841854	0.358986	0.0588868	0.0262688	-0.0762948	6.78913	1.28872	0.00414254	0.299364	0.541025	2.80468e-05	0.810402	0.00105958	1.21679e-31	0.0103929	0.585847	0.935207	0.695477
654	3,4-methyleneheptanoate	434	TRUE	0.344214	-0.179086	0.0941941	0.0354606	0.252379	-0.0189461	0.0146963	-5.56385	-4.98108	0.343851	0.140564	0.541552	0.71189	0.358747	0.035047	0.0441887	0.0608723	0.0601422	0.935207	0.509899
309	sphingomyelin (d17:2/16:0, d18:2/15:0)*	434	TRUE	-2.22866	0.212683	0.0844957	-0.321324	-0.425916	0.0328019	0.0322021	0.702466	1.53777	8.60831e-12	0.0511935	0.5418	0.000192709	0.0844343	4.78921e-05	8.99837e-07	0.792044	0.517935	0.935207	0.341612
569	X - 11522	434	TRUE	0.0211063	-0.0966062	0.0928915	0.535936	0.00197691	0.0155742	-0.0318994	-3.91626	-3.18895	0.953206	0.421556	0.542754	1.66934e-08	0.994201	0.0798163	1.0058e-05	0.182242	0.223723	0.935207	0.759989
616	3-formylindole	434	TRUE	0.658447	-0.0311798	0.0894037	0.520362	0.335911	-0.00240242	-0.024083	9.54815	-3.72026	0.0595772	0.789508	0.546613	1.71434e-08	0.203768	0.78095	0.000601667	0.000817709	0.144099	0.940049	0.949529
316	glycochenodeoxycholate	434	TRUE	0.00756215	0.0388284	0.0897808	0.0898804	0.14206	-0.00151187	0.00237482	-11.9671	-1.55877	0.983036	0.743894	0.55188	0.338496	0.597359	0.863452	0.739525	3.75176e-05	0.547527	0.946072	0.928248
895	gamma-glutamylglutamate	434	TRUE	-1.63791	0.0193338	-0.0842642	0.690987	0.66175	0.00168618	0.0384745	-5.01028	-5.31181	9.4529e-07	0.862516	0.552227	4.75407e-15	0.00881137	0.838206	9.79768e-09	0.0661722	0.0291168	0.946072	0.966405
770	erucate (22:1n9)	434	TRUE	0.0378086	0.15447	0.0853796	0.0829808	0.0332368	0.0203793	-0.0356068	-4.32956	-0.0839416	0.911421	0.173812	0.553816	0.355123	0.897106	0.0152716	1.823e-07	0.118609	0.972962	0.946984	0.565738
215	X - 07765	434	TRUE	-0.769563	0.134928	0.0877362	0.383224	-0.131358	-0.00540752	0.0308329	5.86983	-2.82389	0.0293748	0.253073	0.55834	3.98356e-05	0.622933	0.535741	1.38792e-05	0.041794	0.272657	0.948153	0.663009
675	orotidine	434	TRUE	-1.58651	0.172376	0.0782005	0.629125	0.0573451	0.00677778	0.0321301	2.90617	-3.66436	4.91965e-07	0.10201	0.559057	4.24306e-14	0.810029	0.384711	3.94595e-07	0.259047	0.11091	0.948153	0.45025
174	2-hydroxy-3-methylvalerate	434	TRUE	-0.751319	0.115151	-0.0808487	1.02825	0.0524598	-0.00041223	0.0202342	-5.56646	0.395757	0.0213605	0.291171	0.559432	8.30741e-33	0.831714	0.959255	0.00202671	0.0367082	0.867867	0.948153	0.686549
883	linoleoyl-arachidonoyl-glycerol (18:2/20:4) [1]*	434	TRUE	-1.67116	-0.215127	-0.0890484	0.325664	0.223784	0.0112874	0.0441926	-4.14421	2.65139	3.39935e-06	0.0735636	0.559674	0.000607492	0.41078	0.204346	9.58584e-10	0.158194	0.311856	0.948153	0.39597
570	glycoursodeoxycholate	434	TRUE	-0.319136	-0.102638	0.0876272	0.140917	0.536286	0.0011998	0.012677	-11.4768	-4.56063	0.368915	0.387195	0.560953	0.13295	0.0458709	0.8913	0.075548	7.54284e-05	0.0780615	0.948153	0.739716
278	androstenediol (3alpha, 17alpha) monosulfate (3)	434	TRUE	1.16944	-0.0185915	-0.072165	0.901429	-0.46169	-0.0322312	-0.00045135	-10.1346	-5.08238	6.4598e-05	0.849255	0.561207	1.95412e-31	0.0369969	8.39392e-06	0.938799	2.21759e-05	0.0171805	0.948153	0.958354
731	(S)-3-hydroxybutyrylcarnitine	434	TRUE	-0.419722	0.104586	0.0881961	-0.0333213	0.438646	-0.00327886	0.01131	-5.04741	-3.79602	0.242008	0.382997	0.562321	0.725006	0.105906	0.711559	0.116471	0.0847715	0.146477	0.948153	0.736406
364	2-arachidonoyl-GPE (20:4)*	434	TRUE	-0.370906	-0.121235	0.088577	0.286075	0.868903	0.00786712	-0.00529288	3.07149	2.60995	0.304062	0.314778	0.562966	0.00268065	0.00145362	0.377822	0.465234	0.297109	0.320979	0.948153	0.695477
621	tricosanoyl sphingomyelin (d18:1/23:0)*	434	TRUE	-1.24548	0.240538	0.0919609	0.134137	-0.773786	0.027369	0.00203745	-0.163225	0.417552	0.000930065	0.0556966	0.56453	0.176871	0.00652814	0.00324652	0.787407	0.957608	0.878933	0.948752	0.356458
321	2-hydroxypalmitate	434	TRUE	-0.236646	0.0510423	0.0808669	0.165091	-0.156447	0.0208476	-0.0289551	-0.203505	1.81583	0.476061	0.64554	0.566015	0.0597138	0.533283	0.0110883	1.41398e-05	0.940152	0.453006	0.948752	0.881413
412	X - 24849	434	TRUE	0.310613	-0.0977847	0.0880092	0.535201	0.0705599	0.0105649	-0.0334735	-3.36235	-2.90746	0.391927	0.419951	0.567535	2.31298e-08	0.797047	0.238774	4.35197e-06	0.256234	0.271456	0.948752	0.758621
779	9-hydroxystearate	434	TRUE	0.760857	-0.0938476	0.0819321	-0.750028	0.0961809	-0.00735239	-0.00684463	2.95254	0.0389314	0.0248707	0.407655	0.569129	5.50111e-17	0.707657	0.380469	0.314961	0.286196	0.987432	0.948752	0.754456
671	X - 21383	434	TRUE	-0.262514	-0.0157031	0.0827864	0.273288	0.129614	-0.0158267	0.0227866	6.77113	-6.04186	0.445312	0.89133	0.570536	0.00261872	0.618256	0.0626576	0.000971177	0.0158745	0.0159245	0.948752	0.974473
802	4-hydroxy-2-oxoglutaric acid	434	TRUE	0.0842635	-0.0626271	0.0854794	-0.361719	0.0476539	0.00656113	0.000581546	0.777777	0.160815	0.812598	0.598012	0.570861	0.000116067	0.859279	0.455181	0.93507	0.788638	0.950491	0.948752	0.846652
101	indolelactate	434	TRUE	0.184844	0.0564041	0.0823486	0.881701	0.0312698	-0.00325456	-0.0122367	2.2787	0.437501	0.589737	0.622463	0.5713	2.01514e-22	0.903991	0.700912	0.0755099	0.41545	0.860971	0.948752	0.86202
604	2-stearoyl-GPE (18:0)*	434	TRUE	-0.326848	0.143204	0.0861626	0.327257	0.392253	0.0261729	-0.0344601	8.9708	-2.11943	0.36398	0.233966	0.572757	0.000576549	0.149684	0.00327243	1.88278e-06	0.00227018	0.419195	0.948752	0.64858
540	1-oleoyl-2-dihomo-linolenoyl-GPC (18:1/20:3)*	434	TRUE	-0.211263	-0.128202	0.0874265	-0.280444	0.160285	0.0147567	-0.00657703	13.4969	0.931128	0.563164	0.293784	0.572851	0.00365345	0.561891	0.102308	0.370151	6.04157e-06	0.726578	0.948752	0.687613
39	3-aminoisobutyrate	434	TRUE	1.09899	-0.0363598	-0.0853665	0.0829536	-0.306551	-0.0116889	-0.0281999	3.80038	-0.760238	0.00225505	0.762352	0.576057	0.382574	0.259899	0.188749	9.52304e-05	0.195677	0.771851	0.949636	0.931119
878	caprate (10:0)	434	TRUE	1.261	-0.0334487	0.0788239	-0.577744	-0.0596357	0.000728239	-0.0375643	0.668843	4.3697	0.000151773	0.763656	0.576805	4.92596e-11	0.812736	0.929475	1.92316e-08	0.805567	0.0716394	0.949636	0.931119
472	palmitoleoyl-arachidonoyl-glycerol (16:1/20:4) [2]*	434	TRUE	-1.36416	-0.110292	-0.0851591	0.252749	0.412896	0.0182651	0.0216591	6.47821	2.58182	0.000157855	0.36066	0.578295	0.00801884	0.130471	0.0406925	0.00281746	0.027939	0.326435	0.949636	0.719713
325	X - 11847	434	TRUE	0.430228	0.119958	-0.084261	0.0537738	-0.179472	0.0037232	-0.0209466	-5.70554	-3.28996	0.22894	0.315476	0.578681	0.569013	0.506911	0.673601	0.00353927	0.050629	0.206762	0.949636	0.695477
495	dodecadienoate (12:2)*	434	TRUE	0.916635	-0.284122	0.0917256	0.06182	0.0590135	-0.0244829	-0.00265844	-13.3711	-2.94608	0.0185391	0.0289609	0.578684	0.54755	0.84112	0.0109478	0.733835	2.57794e-05	0.299017	0.949636	0.300873
383	epiandrosterone sulfate	434	TRUE	1.0782	-0.112388	0.0673388	0.633997	-0.26385	-0.0234374	-0.0101594	-0.843179	-4.39962	0.000170256	0.240938	0.580019	5.65068e-17	0.223773	0.00094585	0.0777628	0.718716	0.035274	0.950085	0.65223
744	1-arachidoyl-2-arachidonoyl-GPC (20:0/20:4)*	434	TRUE	-0.113458	0.120642	0.0822328	0.0753543	-0.0739783	0.026304	-0.0338468	3.46288	3.82608	0.747427	0.305522	0.58227	0.417924	0.781273	0.00252409	1.72347e-06	0.228548	0.136152	0.952032	0.695477
600	1-palmitoyl-GPE (16:0)	434	TRUE	0.174047	0.170336	-0.0838913	-0.119508	0.49636	0.0326395	-0.050044	1.77892	-1.15216	0.630209	0.158565	0.584459	0.210584	0.0694386	0.000259665	5.4831e-12	0.546629	0.661859	0.953871	0.546439
679	2-palmitoyl-GPE (16:0)*	434	TRUE	-0.13514	0.07296	-0.0831195	-0.0937897	0.470029	0.0348643	-0.0437135	4.4623	-3.9105	0.708036	0.545171	0.587238	0.32495	0.0849994	9.28182e-05	1.62359e-09	0.129798	0.136988	0.956664	0.819586
644	2-hydroxybutyrate/2-hydroxyisobutyrate	434	TRUE	-1.36702	0.0723502	0.0800671	0.338766	0.506107	0.00829489	0.0299184	-9.73071	-5.07451	9.43641e-05	0.536318	0.589903	0.000247676	0.0559304	0.337803	2.09059e-05	0.000661724	0.0466952	0.956929	0.815858
89	tetradecadienoate (14:2)*	434	TRUE	1.29428	-0.322007	0.0880083	-0.247982	-0.0330629	-0.0257259	-0.00993216	-8.89691	0.850732	0.000803753	0.0125911	0.591209	0.0150174	0.909862	0.00703833	0.20034	0.00476723	0.762417	0.956929	0.239139
615	X - 11850	434	TRUE	0.676604	-0.0689265	-0.0824606	-0.184274	-0.163733	-0.0134109	-0.0114233	6.27813	4.68064	0.0616218	0.568851	0.591389	0.0538779	0.549788	0.13395	0.116144	0.0336233	0.0760131	0.956929	0.827579
700	glycosyl-N-stearoyl-sphingosine (d18:1/18:0)	434	TRUE	-0.878199	0.401572	0.0818723	-0.354884	-0.0827379	0.0379103	-0.0194102	-4.46033	-0.783179	0.0146288	0.000835758	0.591673	0.000186597	0.761006	2.01017e-05	0.00721373	0.128741	0.765103	0.956929	0.0618101
856	glyco-beta-muricholate**	434	TRUE	1.11078	0.0164832	0.0812735	-0.203438	0.00909221	-0.0039789	-0.0297959	-5.69644	1.87859	0.00225701	0.892122	0.598438	0.0341363	0.973628	0.658058	4.5195e-05	0.0550104	0.478431	0.958706	0.974473
173	1-stearoyl-2-docosahexaenoyl-GPC (18:0/22:6)	434	TRUE	-0.538379	-0.00856408	0.0788336	0.203538	-0.167641	0.0207994	-0.0199284	-8.97907	6.99797	0.128548	0.942327	0.59994	0.0295455	0.531445	0.0175275	0.00509165	0.00190071	0.00670774	0.958706	0.983795
236	gamma-glutamyltryptophan	434	TRUE	-0.89952	-0.0310249	-0.0790718	0.424616	-0.14501	0.000589023	0.0223702	-0.114398	-3.62093	0.0113529	0.79387	0.59995	6.01108e-06	0.58942	0.946529	0.00171946	0.968537	0.161967	0.958706	0.951494
790	pyruvate	434	TRUE	-0.863815	-0.0944108	0.0829391	0.0187728	0.401449	0.0145708	0.0148924	-1.53292	-2.86723	0.020492	0.44854	0.600041	0.848743	0.154437	0.113812	0.0466864	0.614428	0.2912	0.958706	0.771421
165	X - 16944	434	TRUE	-0.436753	-0.0040415	-0.0747361	0.154077	0.341322	-0.0105503	0.0251172	-8.9106	-3.98716	0.194861	0.971366	0.601126	0.0832753	0.180362	0.205208	0.00020564	0.00119514	0.104372	0.958706	0.994209
551	1,7-dimethylurate	434	TRUE	-0.835168	0.102528	-0.0828907	-0.107241	0.0342467	0.0181198	0.00250539	11.0805	-1.51042	0.025774	0.412756	0.602007	0.278244	0.903773	0.0503488	0.739112	0.000290212	0.580026	0.958706	0.756298
785	N-acetylleucine	434	TRUE	-1.3897	-0.00838927	0.0754075	0.481344	0.314917	0.00781963	0.0282326	2.56295	4.3279	4.68322e-05	0.941378	0.602655	9.28872e-08	0.22252	0.354085	3.82388e-05	0.357702	0.0818995	0.958706	0.983795
11	sphingomyelin (d18:1/18:1, d18:2/18:0)	434	TRUE	-1.58716	0.071974	0.075621	-0.00412886	-0.694244	0.0105021	0.038791	-10.8961	2.75694	3.60061e-06	0.529538	0.602891	0.963591	0.00736493	0.214873	1.71794e-08	9.75326e-05	0.269412	0.958706	0.813058
337	N6,N6,N6-trimethyllysine	434	TRUE	-0.232644	0.128607	-0.0724568	0.699515	-0.33142	-0.0109916	0.00961067	0.578564	-1.353	0.478706	0.241271	0.603095	7.21592e-16	0.182059	0.175733	0.145092	0.829128	0.571831	0.958706	0.65223
285	pyroglutamylvaline	434	TRUE	-0.578942	0.0707513	0.0798125	0.0827196	-0.239646	-0.00499799	0.0182721	0.878712	3.22875	0.109885	0.558792	0.603471	0.386981	0.38153	0.5766	0.0119936	0.766265	0.221129	0.958706	0.827579
889	homoarginine	434	TRUE	-0.084772	-0.0293038	-0.075918	0.182412	-0.0459263	-0.0250682	0.0376492	-22.0762	-4.27825	0.80747	0.800984	0.607022	0.04704	0.86141	0.00355267	7.09048e-08	7.57402e-15	0.0914648	0.959535	0.953114
603	trans-2-hexenoylglycine	434	TRUE	0.169016	0.0816557	-0.0687941	-0.410062	-0.270776	0.0022108	-0.012178	-0.997218	-2.59746	0.594042	0.440982	0.609162	9.71132e-07	0.258843	0.777908	0.0558593	0.700053	0.260992	0.959535	0.767223
373	glycocholenate sulfate*	434	TRUE	-0.475119	-0.237108	-0.0763843	0.394089	-0.0189491	0.00169818	0.0138541	0.463608	3.32825	0.177363	0.0439667	0.609288	2.26073e-05	0.943286	0.845353	0.0501756	0.871897	0.194728	0.959535	0.317695
813	oleoyl-arachidonoyl-glycerol (18:1/20:4) [2]*	434	TRUE	-2.09874	0.0807943	-0.0743001	0.456775	0.553311	0.0297944	0.0284323	-0.279142	4.65107	9.53033e-10	0.481018	0.609792	4.60364e-07	0.0329617	0.000442736	3.68778e-05	0.920605	0.0628413	0.959535	0.780835
432	N-acetylisoleucine	434	TRUE	-1.47935	0.0136332	-0.0724705	0.602437	0.451226	0.00550296	0.0343275	-0.844131	-1.39262	1.00793e-05	0.903086	0.610212	9.76514e-12	0.0749271	0.506382	3.36927e-07	0.757583	0.568403	0.959535	0.974473
6	2-hydroxydecanoate	434	TRUE	0.887494	0.212588	-0.0785781	0.11228	-0.192505	0.00440092	-0.0432412	3.57433	2.52295	0.0146215	0.0800974	0.610418	0.242051	0.483726	0.624259	3.15514e-09	0.228329	0.340841	0.959535	0.404876
689	5,6-dihydrouridine	434	TRUE	-0.43299	0.156976	0.0669639	0.267504	-0.0331311	-0.00560367	0.00950005	20.5673	-1.41981	0.165278	0.132252	0.613048	0.00116812	0.888349	0.467547	0.129566	6.78634e-16	0.532383	0.959925	0.5054
493	3-hydroxyoctanoate	434	TRUE	0.337087	-0.146216	0.082523	0.0899568	0.00816614	-0.00511694	-0.00805129	-8.83853	0.945848	0.381746	0.256239	0.613803	0.376678	0.977646	0.591159	0.298234	0.00495968	0.736265	0.959925	0.663009
93	X - 21319	434	TRUE	0.84663	-0.067675	-0.075054	0.0976715	0.172706	-0.0250635	0.00413437	-5.79229	-4.25436	0.0160388	0.564623	0.614896	0.292747	0.515976	0.00392683	0.558207	0.0435621	0.0968058	0.959925	0.827579
57	succinimide	434	TRUE	0.690323	-0.0733136	0.0731901	0.560818	-0.216884	-0.00536316	-0.0260161	-1.317	-3.55993	0.0447154	0.523526	0.615974	6.57137e-10	0.404314	0.528099	0.000165426	0.638962	0.155451	0.959925	0.808757
826	myristoleoylcarnitine (C14:1)*	434	TRUE	0.687997	-0.17306	0.0802916	0.332019	-0.184421	-0.00364413	-0.0286737	-4.29084	2.27039	0.0682483	0.16992	0.616023	0.000860567	0.518079	0.696006	0.000154476	0.163581	0.408963	0.959925	0.565738
877	kynurenine	434	TRUE	-1.47929	0.155356	0.07446	0.485322	-0.444968	0.00599287	0.0316841	10.655	-1.4913	2.78028e-05	0.18784	0.619097	1.9183e-07	0.0955338	0.492184	7.84982e-06	0.000217409	0.562074	0.96224	0.581146
665	X - 21258	434	TRUE	-0.373455	0.161935	-0.0706768	0.453	-0.0212569	0.0340226	-0.0404662	2.69625	9.7829	0.265781	0.148758	0.619657	3.18295e-07	0.933248	4.10533e-05	1.92586e-09	0.324984	6.32336e-05	0.96224	0.526238
367	phenyllactate (PLA)	434	TRUE	-0.20331	0.0567824	0.0720735	0.936815	0.1227	-0.00654083	0.00488205	2.09497	3.67648	0.554104	0.620993	0.621111	5.46498e-25	0.636825	0.441289	0.479342	0.455162	0.142069	0.962829	0.861316
590	erythritol	434	TRUE	-1.0022	0.100588	0.0684912	0.145372	0.622893	0.0203355	0.0017628	5.19894	-0.521134	0.00247411	0.363364	0.625939	0.0963884	0.0128686	0.0129767	0.790963	0.0544337	0.829016	0.966678	0.721894
541	arabitol/xylitol	434	TRUE	-0.769506	0.26731	-0.0678511	0.448794	0.240477	0.0137075	-0.00724394	5.36084	-0.675527	0.0192349	0.0149582	0.626642	2.3317e-07	0.333355	0.0915985	0.272529	0.0457271	0.777934	0.966678	0.248195
253	beta-alanine	434	TRUE	-0.621776	-0.0759241	-0.0733026	0.69507	-0.894441	-0.00260231	0.0179344	-0.237208	1.71585	0.0801828	0.522624	0.626885	1.28795e-13	0.000874156	0.767042	0.0119791	0.934828	0.507601	0.966678	0.808757
491	1-arachidonoyl-GPE (20:4n6)*	434	TRUE	-0.631227	0.0206659	-0.0763266	0.312867	0.374212	0.02524	-0.016144	0.453014	3.56345	0.0889844	0.867667	0.627909	0.00140985	0.182437	0.00593628	0.0303227	0.881133	0.187642	0.966678	0.969363
832	1-palmitoyl-2-arachidonoyl-GPE (16:0/20:4)*	434	TRUE	-1.12603	0.137617	0.0756924	-0.363487	0.760413	0.0377826	-0.00422116	-2.99747	1.68057	0.00245215	0.267945	0.631309	0.000212804	0.00683029	3.92296e-05	0.571797	0.323225	0.534988	0.96955	0.667515
623	tetradecadienedioate (C14:2-DC)*	434	TRUE	0.183616	-0.0111506	0.0763353	-0.0799829	0.0211998	-0.00248342	-0.00508601	3.70116	-0.646032	0.627083	0.929649	0.634069	0.422843	0.940871	0.790366	0.502823	0.230248	0.814539	0.96955	0.97996
70	N-palmitoyl-sphinganine (d18:0/16:0)	434	TRUE	-2.01636	0.465804	-0.075434	0.0464727	0.480102	0.0288202	0.0272457	0.181262	-2.9962	6.80638e-08	0.000191275	0.634239	0.637622	0.0893166	0.00180656	0.000282817	0.952612	0.271173	0.96955	0.0342764
88	1-(1-enyl-stearoyl)-2-linoleoyl-GPC (P-18:0/18:2)*	434	TRUE	1.32668	0.29742	-0.0658437	-0.144104	-0.751098	0.00903882	-0.0589585	-7.58109	6.64474	5.32383e-05	0.00671151	0.636464	0.096448	0.00248465	0.265363	3.83621e-19	0.00467173	0.00547951	0.96955	0.187922
428	alpha-ketoglutarate	434	TRUE	-1.53824	0.228044	-0.0648624	0.398451	0.703406	0.0124418	0.024356	-3.94165	-1.93001	2.04667e-06	0.035148	0.636991	3.18334e-06	0.00408551	0.120211	0.000181239	0.136035	0.413562	0.96955	0.300873
43	caffeine	434	TRUE	-0.540955	-0.0139944	-0.0755423	-0.315366	0.38049	0.0116173	0.00709246	5.47867	-1.51569	0.152315	0.911768	0.637579	0.00157555	0.183079	0.213638	0.350077	0.075736	0.582062	0.96955	0.974473
539	X - 17351	434	TRUE	0.889666	-0.0471685	0.0770534	-0.141323	0.280163	-0.00276041	-0.0288364	10.2727	5.27667	0.0210368	0.714321	0.637671	0.165106	0.33665	0.772103	0.000196316	0.00109916	0.0603857	0.96955	0.916951
580	uridine	434	TRUE	0.0997973	0.0996561	0.0754739	0.592949	-0.631215	0.000969749	-0.014114	-5.89833	-0.976314	0.792057	0.430816	0.638431	2.98384e-09	0.0274521	0.917454	0.0633818	0.0562744	0.723384	0.96955	0.763123
50	N6-carbamoylthreonyladenosine	434	TRUE	-1.79529	0.100524	0.0647945	0.611632	-0.210874	0.0101268	0.0337419	11.1036	0.0343989	5.67397e-08	0.36303	0.644255	2.47681e-12	0.399112	0.215397	3.76807e-07	3.90002e-05	0.988611	0.972073	0.721894
118	tiglylcarnitine (C5:1-DC)	434	TRUE	-0.611113	-0.0757907	-0.0664133	0.859912	-0.0683847	0.00763528	-0.00307894	-2.63783	3.22985	0.0715892	0.503718	0.644471	7.86587e-22	0.789773	0.362455	0.651282	0.340721	0.191295	0.972073	0.800232
836	3-methoxytyrosine	434	TRUE	1.20162	-0.0465334	0.067428	-0.0701414	-0.331468	-0.0171552	-0.0261094	-3.79682	12.9221	0.000519563	0.687564	0.646267	0.44295	0.205543	0.0450204	0.000173578	0.179145	3.03096e-07	0.972073	0.899354
710	1-palmitoyl-2-oleoyl-GPE (16:0/18:1)	434	TRUE	-1.73136	0.215811	0.0723891	-0.344415	0.710971	0.0397732	0.0141662	-0.734889	-0.528467	4.18681e-06	0.0860745	0.650224	0.000526264	0.0124589	1.89579e-05	0.0608203	0.810877	0.847148	0.972073	0.41688
465	fumarate	434	TRUE	-0.228046	0.0438321	0.0708927	-0.0118686	-0.012626	0.020189	-0.0250606	1.60891	1.63525	0.536284	0.722064	0.650482	0.902979	0.963886	0.02676	0.000714551	0.592978	0.542812	0.972073	0.919469
431	X - 23644	434	TRUE	-0.201275	0.00803987	-0.0669865	0.137384	0.389692	0.00584937	-0.0046964	5.72628	0.259918	0.563537	0.944958	0.650525	0.135405	0.139204	0.497084	0.502192	0.044103	0.918474	0.972073	0.983795
879	X - 13866	434	TRUE	0.450031	0.0134301	-0.0696509	0.229258	0.242209	0.00691838	-0.0308832	-5.46516	0.657408	0.214716	0.911779	0.650878	0.0166778	0.377239	0.440331	2.24146e-05	0.0649179	0.803579	0.972073	0.974473
791	X - 24306	434	TRUE	0.382914	0.0188568	-0.0700184	0.418161	-0.230885	-0.0178381	-0.00505468	-5.5174	-1.42993	0.297242	0.877922	0.653287	1.6244e-05	0.405912	0.0494729	0.493268	0.0657697	0.593222	0.972073	0.974473
558	X - 14056	434	TRUE	-0.888615	-0.133897	-0.0687351	0.407904	0.481293	-0.00207084	0.0274524	2.01603	-3.15999	0.0138613	0.267181	0.653722	1.88478e-05	0.0779898	0.816534	0.000153504	0.494002	0.229797	0.972073	0.667515
758	catechol sulfate	434	TRUE	0.557469	-0.0333971	0.0662138	0.150992	-0.0894176	0.00543014	-0.0322294	8.59977	-0.0713769	0.109802	0.774368	0.654429	0.100938	0.734482	0.528597	4.16121e-06	0.00251085	0.977585	0.972073	0.940154
630	pregnenolone sulfate	434	TRUE	2.16022	0.0249126	-0.0551428	0.456534	-0.64808	-0.0365935	-0.0203327	0.977152	3.83127	1.0511e-13	0.797522	0.654701	2.67549e-09	0.00318513	3.49057e-07	0.000493773	0.68036	0.0703897	0.972073	0.952773
860	1-carboxyethylvaline	434	TRUE	-2.70064	0.169102	-0.0608128	0.511576	0.373873	0.0201378	0.0555429	-5.52254	-2.82023	3.54174e-17	0.114338	0.654718	1.48707e-09	0.122903	0.0110156	6.14926e-18	0.0347608	0.227177	0.972073	0.483238
58	sphingomyelin (d18:2/14:0, d18:1/14:1)*	434	TRUE	-1.75903	0.182423	0.0583513	-0.686027	-0.311731	0.0261253	0.0323871	4.61155	-0.306699	1.40161e-08	0.0783117	0.657388	5.31137e-17	0.183693	0.000652554	1.98297e-07	0.0684448	0.892025	0.972073	0.404876
449	1-carboxyethylleucine	434	TRUE	-2.64261	0.100272	-0.0571169	0.699292	0.340329	0.0223111	0.051852	-5.4269	-2.87603	8.09857e-18	0.328929	0.661406	6.87052e-18	0.143125	0.00331595	4.4548e-17	0.0305295	0.199092	0.972073	0.69839
864	cystine	434	TRUE	-1.13124	-0.00903522	-0.0689899	0.342743	0.303382	0.00556461	0.0245036	1.08182	-0.682086	0.00246455	0.942314	0.663448	0.0005125	0.282954	0.54683	0.00109311	0.72281	0.802188	0.972073	0.983795
104	3-(3-amino-3-carboxypropyl)uridine*	434	TRUE	-1.70773	0.110884	0.060044	0.646646	0.0223809	0.0152152	0.0229345	4.90372	-0.471266	1.76011e-07	0.310191	0.665163	6.87372e-14	0.927877	0.0597516	0.000478372	0.0661579	0.843205	0.972073	0.695477
474	hippurate	434	TRUE	0.41161	-0.0151996	0.0658307	-0.117142	-0.163892	0.0127383	-0.0359138	8.51497	2.00929	0.252828	0.899449	0.666458	0.217756	0.547121	0.152233	6.76983e-07	0.00375547	0.443662	0.972073	0.974473
40	1-(1-enyl-oleoyl)-GPE (P-18:1)*	434	TRUE	-0.0689404	0.0256231	0.063626	0.249876	-0.0380954	0.00229419	-0.00672269	-3.76811	0.245763	0.844128	0.826905	0.668905	0.00695556	0.885762	0.791239	0.339757	0.187996	0.923374	0.972073	0.953114
369	sphingomyelin (d18:1/20:2, d18:2/20:1, d16:1/22:2)*	434	TRUE	-0.731541	-0.0200712	0.059783	-0.400929	-0.624293	-0.00257686	0.0371274	-0.220729	0.331353	0.0266474	0.85559	0.669439	4.20475e-06	0.012369	0.752088	2.12485e-08	0.934697	0.890412	0.972073	0.963077
22	X - 12847	434	TRUE	-0.639492	-0.054529	0.0661439	0.360725	-0.0480576	0.00649578	0.0141189	7.53691	2.09958	0.0810224	0.656178	0.670611	0.000193447	0.862349	0.473373	0.0551033	0.0117623	0.431801	0.972073	0.883103
461	1-(1-enyl-palmitoyl)-GPC (P-16:0)*	434	TRUE	0.744946	0.093905	-0.0629942	0.462052	-0.344635	0.0101554	-0.04871	1.27272	2.6234	0.0351875	0.426919	0.674673	7.51502e-07	0.197579	0.245401	7.02315e-12	0.659338	0.308748	0.972073	0.762442
109	behenoylcarnitine (C22)*	434	TRUE	-1.14294	0.152212	0.0615422	0.175587	0.0994514	0.0282624	-0.00384955	-5.5917	-2.65671	0.00100787	0.190045	0.676469	0.055716	0.705162	0.0010033	0.581317	0.0487388	0.294214	0.972073	0.585157
499	1-adrenoyl-GPC (22:4)*	434	TRUE	-0.459656	-0.0910991	-0.0630201	0.398485	0.172483	0.0102307	-5.93422e-05	6.42635	6.49816	0.199005	0.446227	0.678139	2.47584e-05	0.523919	0.247471	0.993413	0.0278183	0.0127122	0.972073	0.771421
419	pipecolate	434	TRUE	0.381876	0.0293765	-0.0714363	-0.00780649	0.0122347	0.00460959	-0.0145853	4.44252	1.9279	0.347121	0.828656	0.678511	0.941973	0.968227	0.64614	0.07378	0.180266	0.514812	0.972073	0.953114
475	pregnenediol disulfate (C21H34O8S2)*	434	TRUE	0.576011	0.217257	-0.0547607	0.76178	-0.960803	-0.0147439	0.000347695	-10.0344	-1.02271	0.0658377	0.0378763	0.680231	3.15235e-20	4.96109e-05	0.0567943	0.955909	8.64376e-05	0.654006	0.972073	0.300972
71	carnitine	434	TRUE	-0.857448	0.120524	-0.0576123	1.07862	0.0765724	0.000392793	0.00734931	-8.21875	1.94273	0.00942581	0.274832	0.680993	3.85801e-35	0.759161	0.961625	0.267869	0.00229913	0.419541	0.972073	0.674657
529	palmitoyl sphingomyelin (d18:1/16:0)	434	TRUE	-0.362915	0.222374	0.0614719	0.171481	-0.970198	0.0246427	-0.0269482	0.574876	5.46105	0.307203	0.0611692	0.683554	0.0676544	0.000306546	0.0050312	0.000159815	0.842924	0.034981	0.972073	0.375395
812	mannitol/sorbitol	434	TRUE	-0.703141	0.184429	-0.0525971	-0.0423426	0.900667	0.00996381	0.00244788	3.59763	-1.20024	0.0210657	0.0702081	0.684252	0.598816	9.33341e-05	0.186022	0.689257	0.148197	0.588949	0.972073	0.393165
81	tyrosine	434	TRUE	-1.14824	0.111018	0.0624612	0.411179	-0.0116305	-0.00342756	0.0338593	-5.38272	2.19187	0.00157158	0.360414	0.685288	1.8098e-05	0.966228	0.702647	3.46171e-06	0.0694607	0.407624	0.972073	0.719713
567	1-stearoyl-2-adrenoyl-GPC (18:0/22:4)*	434	TRUE	-1.44327	0.0106068	-0.0603195	0.253169	0.148435	0.0188767	0.0244035	3.26396	7.48511	4.17081e-05	0.928194	0.686494	0.00648238	0.577329	0.0301387	0.000560753	0.256249	0.00354089	0.972073	0.979579
657	nervonoylcarnitine (C24:1)*	434	TRUE	-0.989585	0.209466	0.0581751	0.500899	0.137813	0.0407316	-0.0332945	-4.6291	-3.40368	0.00361013	0.0652683	0.686788	2.41656e-08	0.59199	1.25803e-06	1.0853e-06	0.0953492	0.169538	0.972073	0.381313
90	X - 16946	434	TRUE	0.344484	-0.126255	0.0624598	0.501652	-0.0251211	0.00724311	-0.0317038	-2.05579	-2.94864	0.347976	0.303338	0.688392	2.26549e-07	0.927888	0.424678	1.70244e-05	0.49262	0.270283	0.972073	0.695477
754	1-dihomo-linolenoyl-GPC (20:3n3 or 6)*	434	TRUE	-0.939403	0.0134739	0.0623851	0.31173	0.230694	0.0231857	-0.00246015	13.8268	-0.639618	0.0104423	0.912481	0.688574	0.00128929	0.405642	0.0105579	0.738439	3.8828e-06	0.810893	0.972073	0.974473
833	1-methyl-4-imidazoleacetate	434	TRUE	-1.87388	0.235795	-0.0587545	0.305552	-0.326843	0.0311069	0.00933569	10.6391	-1.30057	6.03395e-08	0.0413488	0.688904	0.000820629	0.211452	0.000274252	0.178966	0.000164343	0.605844	0.972073	0.305869
496	X - 12680	434	TRUE	-0.76396	0.0717464	-0.0589598	0.127336	0.220071	0.00868519	0.00811191	0.701911	4.36002	0.0317613	0.546192	0.696109	0.175238	0.413363	0.323323	0.25624	0.809008	0.0926051	0.972073	0.819746
769	X - 13729	434	TRUE	-0.534021	0.253631	0.0596636	0.0442528	-0.142958	0.00684395	-0.00150704	7.74492	0.388102	0.138652	0.0353277	0.696602	0.642114	0.600138	0.442619	0.835168	0.00851257	0.88259	0.972073	0.300873
645	3-hydroxybutyrate (BHBA)	434	TRUE	0.485037	0.0161568	0.0562043	-0.0290479	-0.0760384	-0.00625169	-0.0119538	-6.74626	-2.27296	0.154996	0.887276	0.697749	0.747035	0.768143	0.458364	0.0809699	0.0153861	0.360441	0.972073	0.974473
130	xanthurenate	434	TRUE	-1.1028	-0.131924	-0.0587644	0.459744	-0.15047	0.00677162	0.030596	3.81112	-3.32319	0.00202297	0.269164	0.698274	1.09525e-06	0.577567	0.44319	2.00637e-05	0.191257	0.201781	0.972073	0.667515
208	5-oxoproline	434	TRUE	0.721751	-0.00594288	0.056989	0.660071	-0.15317	-0.00864001	-0.0288378	-0.588937	-2.3802	0.0373066	0.95908	0.698384	5.489e-13	0.558967	0.313219	3.43135e-05	0.835101	0.345988	0.972073	0.988925
698	2'-O-methyluridine	434	TRUE	-1.10927	0.186542	-0.061112	0.553992	-0.81692	0.0247454	-0.00413117	-2.80821	5.94618	0.00291392	0.134153	0.699138	1.79978e-08	0.0037459	0.00722248	0.580963	0.355912	0.0285477	0.972073	0.5054
82	tryptophan betaine	434	TRUE	1.08412	-0.0830376	0.0559781	-0.375058	0.153167	-0.00136388	-0.0297442	17.3576	0.572387	0.00152027	0.467385	0.69961	3.26082e-05	0.553599	0.871795	1.48064e-05	4.99439e-10	0.818299	0.972073	0.775513
576	N-acetylphenylalanine	434	TRUE	-1.37822	0.0996735	-0.0530496	0.483258	0.0746813	0.0100803	0.0226318	5.4531	3.2015	2.15311e-05	0.357887	0.69995	1.68354e-08	0.760814	0.208724	0.000513524	0.0394686	0.175649	0.972073	0.719713
424	X - 16580	434	TRUE	-0.357439	-0.0733714	-0.0578122	0.270352	0.148788	0.00513693	-0.0061905	-2.83811	0.35032	0.312886	0.535332	0.700475	0.00384206	0.578555	0.557369	0.384159	0.326267	0.892033	0.972073	0.815743
193	oleoyl-linoleoyl-glycerol (18:1/18:2) [2]	434	TRUE	-1.82144	-0.0527795	0.0589852	0.327637	0.49631	0.0231887	0.0317742	-0.322031	-7.40709	4.73581e-07	0.662306	0.700681	0.000600825	0.0695547	0.0094831	1.2153e-05	0.91313	0.00494219	0.972073	0.885718
370	paraxanthine	434	TRUE	-0.465174	0.00633265	-0.0602732	-0.0846208	-0.11912	0.0132141	-0.00100516	7.06887	-1.4117	0.208344	0.959125	0.700839	0.386057	0.670086	0.148214	0.892325	0.0191709	0.600305	0.972073	0.988925
212	carotene diol (1)	434	TRUE	0.5574	0.247725	-0.0530887	-0.0711653	-0.561041	0.0301223	-0.0605645	-2.94323	8.22808	0.0891112	0.023761	0.70275	0.411043	0.0236478	0.000201693	3.65569e-20	0.27144	0.000573334	0.972073	0.300873
708	acisoga	434	TRUE	-0.756687	0.244804	-0.0623512	0.264458	-0.0499168	0.00903356	0.00367854	2.13626	0.58449	0.0495174	0.057243	0.702892	0.00932896	0.863962	0.342815	0.634486	0.496945	0.835076	0.972073	0.363249
489	X - 12729	434	TRUE	0.348307	0.0527937	0.0581548	0.085765	-0.0279145	0.00380419	-0.0178794	-17.6731	6.227	0.333687	0.66105	0.703655	0.367316	0.9184	0.669271	0.0134801	1.86529e-09	0.0177061	0.972073	0.885718
75	phosphatidylethanolamine (P-18:1/20:4, P-16:0/22:5n3)*	434	TRUE	-0.429304	0.28903	-0.0619512	0.51982	-0.244069	0.0105659	-0.00630296	-7.78276	3.68205	0.264821	0.0246752	0.704522	3.16292e-07	0.401869	0.266888	0.414989	0.013269	0.189378	0.972073	0.300873
598	androstenediol (3beta,17beta) disulfate (2)	434	TRUE	0.898817	0.0218066	-0.0449863	0.853532	-0.497762	-0.0284695	0.00665348	-4.10506	-4.33664	0.00131806	0.815613	0.70478	7.22265e-31	0.0186633	3.85597e-05	0.236459	0.0723093	0.033445	0.972073	0.953114
463	1-docosapentaenoyl-GPC (22:5n6)*	434	TRUE	0.0247244	-0.0560332	0.0601841	0.258661	0.176696	0.00453114	-0.0090528	4.22603	6.50987	0.94759	0.655755	0.706103	0.00920203	0.534468	0.626003	0.230766	0.168687	0.0175448	0.972073	0.883103
647	quinate	434	TRUE	-0.364254	0.115992	-0.0577862	-0.00263815	-0.101333	0.0164266	-0.0121838	8.39657	-4.45387	0.313361	0.336706	0.706217	0.977938	0.710726	0.0658592	0.0931307	0.00441177	0.0907018	0.972073	0.706687
729	glycolithocholate sulfate*	434	TRUE	0.942432	-0.0688026	0.0577812	-0.136472	-0.571589	-0.0066859	-0.0211933	12.9844	4.27645	0.00932145	0.570033	0.707151	0.153889	0.0370474	0.45553	0.00359966	1.14148e-05	0.105438	0.972073	0.827795
191	octadecenedioate (C18:1-DC)*	434	TRUE	1.50772	-0.132163	-0.0570111	0.0333848	0.191123	-0.0111998	-0.0386145	1.21471	0.111115	3.05503e-05	0.274118	0.710231	0.72661	0.484628	0.21022	1.05619e-07	0.6807	0.966366	0.972073	0.674657
677	X - 21353	434	TRUE	1.28022	-0.322468	0.0600447	0.0170763	-0.0917098	-0.0269426	-0.01052	-13.4866	-0.381892	0.000815113	0.0116289	0.711362	0.86571	0.751161	0.00436952	0.170787	1.55824e-05	0.891002	0.972073	0.231543
312	1-stearoyl-2-dihomo-linolenoyl-GPC (18:0/20:3n3 or 6)*	434	TRUE	-1.8871	-0.0124245	0.0518935	-0.030467	0.299277	0.0183088	0.042436	9.15977	2.11672	1.29e-08	0.910783	0.712435	0.728024	0.232983	0.0255928	1.91445e-10	0.000719773	0.381332	0.972073	0.974473
153	1-(1-enyl-palmitoyl)-GPE (P-16:0)*	434	TRUE	-0.385097	0.0168101	0.0545847	0.370513	0.000580192	0.00307037	0.00256654	-3.56286	0.616127	0.271716	0.885841	0.7135	6.20099e-05	0.998253	0.722945	0.715309	0.21285	0.809308	0.972073	0.974473
334	1-stearoyl-2-oleoyl-GPE (18:0/18:1)	434	TRUE	-1.81815	0.309954	0.057627	-0.130325	0.720348	0.0400337	0.0142229	-1.31194	1.28435	9.18299e-07	0.0122822	0.713885	0.1827	0.0101245	1.22904e-05	0.0558968	0.664365	0.634205	0.972073	0.239139
562	glycochenodeoxycholate 3-sulfate	434	TRUE	0.173611	-0.0107721	-0.0546398	0.249656	-0.137485	-0.00294423	-0.000278631	-9.788	0.181936	0.623127	0.9273	0.715485	0.00744214	0.606826	0.735998	0.968675	0.000688335	0.943659	0.972073	0.979579
53	1-margaroyl-2-arachidonoyl-GPC (17:0/20:4)*	434	TRUE	-0.194351	-0.228892	0.0572444	0.364532	0.134959	0.0136997	-0.0178675	-1.46423	11.9085	0.599912	0.0645244	0.715782	0.000194544	0.630059	0.134705	0.0163485	0.6283	1.03145e-05	0.972073	0.381313
634	X - 23590	434	TRUE	-0.881196	0.0689686	0.0485631	-0.107349	-0.0373825	-0.00951392	0.0394102	2.80876	-0.321486	0.00549641	0.515533	0.718399	0.200209	0.876232	0.225246	6.30434e-10	0.278301	0.889449	0.972073	0.806791
579	1-palmitoyl-2-stearoyl-GPC (16:0/18:0)	434	TRUE	-0.794467	0.25241	-0.0547111	0.435457	-0.41981	0.045972	-0.0397017	3.38826	5.04115	0.0268961	0.0353838	0.719471	4.35044e-06	0.122022	2.2109e-07	3.66124e-08	0.247583	0.0539772	0.972073	0.300873
468	cis-4-decenoylcarnitine (C10:1)	434	TRUE	0.583634	-0.210009	-0.0551292	0.309544	-0.347925	-0.0146627	-0.00807244	-10.6018	2.9659	0.106919	0.0825756	0.719673	0.00120219	0.20377	0.101296	0.266875	0.000333591	0.260888	0.972073	0.411043
749	sphingomyelin (d18:1/20:0, d16:1/22:0)*	434	TRUE	-1.55331	0.215807	0.0569155	0.0803869	-0.601492	0.0295675	0.00963126	0.521868	0.870368	3.316e-05	0.084422	0.720028	0.415923	0.0335585	0.00139191	0.200046	0.864353	0.749608	0.972073	0.412407
871	1-(1-enyl-palmitoyl)-2-docosahexaenoyl-GPC (P-16:0/22:6)*	434	TRUE	0.354503	0.184127	-0.0545326	0.255772	-0.520668	0.0201606	-0.0457725	-9.45473	6.56209	0.322894	0.124439	0.720064	0.00690996	0.0548729	0.0229456	2.08171e-10	0.0012386	0.0120366	0.972073	0.504402
851	1-docosapentaenoyl-GPC (22:5n3)*	434	TRUE	-0.55683	0.0290257	-0.0550817	0.682986	-0.170711	0.0264065	-0.0323745	4.31552	5.68893	0.128965	0.812802	0.723388	1.75708e-12	0.538241	0.00358299	1.10753e-05	0.149456	0.0332919	0.972073	0.953114
446	palmitoyl-sphingosine-phosphoethanolamine (d18:1/16:0)	434	TRUE	0.209484	0.130968	-0.0550347	0.178179	-0.404246	0.00739942	-0.0249208	0.628529	3.35328	0.571128	0.289319	0.725828	0.068074	0.148377	0.418304	0.000793906	0.835083	0.213435	0.972073	0.685792
218	cortisone	434	TRUE	1.37126	0.104059	-0.0500424	0.121149	-0.215643	0.00158331	-0.047644	-7.09238	2.58975	4.66316e-05	0.35515	0.726183	0.173053	0.397132	0.849147	1.86327e-12	0.00987783	0.291281	0.972073	0.719713
606	deoxycholic acid glucuronide	434	TRUE	-1.03011	-0.0630165	0.0528705	0.223339	0.604899	0.0213674	0.00531896	12.4462	3.8885	0.00391734	0.597448	0.727137	0.0178497	0.0250901	0.0154866	0.458294	1.9553e-05	0.135084	0.972073	0.846652
721	1-oleoyl-2-linoleoyl-GPE (18:1/18:2)*	434	TRUE	-0.380357	0.226077	-0.0566922	-0.549689	0.441313	0.0255474	-0.011309	0.980803	-6.38431	0.323741	0.0792351	0.728867	6.62385e-08	0.130024	0.0073308	0.144047	0.755244	0.0230265	0.972073	0.404876
648	1,2-dipalmitoyl-GPC (16:0/16:0)	434	TRUE	-0.186278	0.239605	-0.0535537	-0.0062548	-0.517354	0.0221402	-0.0218467	3.71483	4.37671	0.613565	0.0519289	0.732235	0.948796	0.0636513	0.0151735	0.00318898	0.2173	0.103476	0.972073	0.341612
480	nonanoylcarnitine (C9)	434	TRUE	-0.109888	-0.0798023	0.0544851	0.338117	-0.289283	0.0142111	-0.0221963	-2.09498	6.17257	0.769926	0.525052	0.732531	0.000653876	0.308617	0.125969	0.00326624	0.494551	0.0241655	0.972073	0.809719
622	1-myristoyl-2-palmitoyl-GPC (14:0/16:0)	434	TRUE	-1.03185	0.138224	0.0497227	-0.461136	0.0948637	0.0353397	-0.000956059	10.4591	1.30684	0.00270984	0.229323	0.733429	3.86082e-07	0.715431	3.25089e-05	0.889964	0.000196171	0.602225	0.972073	0.640888
48	X - 11483	434	TRUE	-0.281173	-0.192829	0.0523401	0.203197	-0.0592517	0.00362812	0.00283079	10.9791	3.32679	0.440434	0.113381	0.73503	0.0347322	0.829788	0.687154	0.698961	0.000223922	0.210351	0.972073	0.483238
761	dihomo-linolenoyl-choline	434	TRUE	-0.605097	0.106604	-0.0522922	0.0558727	-0.402428	0.020933	-0.0115325	6.44159	2.35716	0.0968876	0.381464	0.735277	0.56154	0.144292	0.0201553	0.115159	0.0303816	0.374825	0.972073	0.735036
799	X - 21467	434	TRUE	-0.925341	-0.0172054	-0.0502334	0.121156	1.08828	0.00213714	0.0259241	-3.3727	-0.52023	0.00828916	0.883218	0.735541	0.190492	4.02968e-05	0.805159	0.000230752	0.238464	0.838602	0.972073	0.974473
272	1-palmityl-GPC (O-16:0)	434	TRUE	0.280172	0.0808377	0.0510989	0.436411	-0.146381	0.010799	-0.0309249	3.87385	-1.15181	0.433562	0.498959	0.736416	3.84171e-06	0.588482	0.222034	1.67831e-05	0.184678	0.658633	0.972073	0.797201
863	glutamine conjugate of C6H10O2 (1)*	434	TRUE	-0.430535	0.255841	-0.0507859	-0.0326895	0.107751	0.000404121	0.00570223	0.00808961	-2.57814	0.230868	0.0331303	0.739075	0.730447	0.691725	0.963711	0.429458	0.997799	0.324836	0.972073	0.300873
294	5alpha-androstan-3beta,17alpha-diol disulfate	434	TRUE	0.627914	-0.0490226	0.0495039	0.637134	0.0607007	-0.0200481	-0.00890472	5.60854	-5.63919	0.0741244	0.676523	0.740031	6.75332e-12	0.819423	0.0210695	0.207306	0.0506848	0.0277408	0.972073	0.894049
527	dehydroepiandrosterone sulfate (DHEA-S)	434	TRUE	1.70112	-0.0411094	0.0348463	0.694725	-0.700071	-0.0349388	-0.00642853	-2.93444	-2.49028	7.73362e-12	0.620689	0.74112	3.51252e-26	0.000196014	1.29854e-08	0.197864	0.148126	0.169202	0.972073	0.861316
102	sphingomyelin (d18:1/22:2, d18:2/22:1, d16:1/24:2)*	434	TRUE	-1.14202	0.0457208	0.046586	-0.280962	-0.904837	0.00428263	0.0402544	-0.379722	-0.875248	0.000649785	0.682898	0.743046	0.00148696	0.00035342	0.604927	2.16826e-09	0.889529	0.719869	0.972073	0.89718
38	1-dihomo-linoleoyl-GPC (20:2)*	434	TRUE	0.371561	0.128323	-0.0481805	0.185336	0.0213726	0.0202617	-0.0442194	3.94876	-3.4796	0.284287	0.268485	0.743505	0.0431001	0.93509	0.0181682	2.22676e-10	0.163305	0.168811	0.972073	0.667515
479	sphingomyelin (d18:1/22:1, d18:2/22:0, d16:1/24:1)*	434	TRUE	-1.15457	0.0937026	0.0477741	-0.0858972	-0.820155	0.0257435	0.00262729	-0.506976	1.60221	0.000834655	0.417142	0.744569	0.346509	0.00169906	0.00258018	0.705023	0.857368	0.524614	0.972073	0.758133
94	2,3-dihydroxy-5-methylthio-4-pentenoate (DMTPA)*	434	TRUE	-2.23255	0.12405	-0.0395343	0.732116	0.019507	0.0173805	0.035009	10.0078	-1.34558	8.4151e-15	0.196896	0.746014	5.47105e-22	0.928547	0.0145094	1.36272e-09	2.02475e-05	0.520922	0.972073	0.598029
376	docosadioate (C22-DC)	434	TRUE	0.398398	-0.241696	-0.0524678	0.155804	0.187108	-0.00642047	-0.00346613	4.24414	2.10285	0.296908	0.0582768	0.74613	0.122364	0.517115	0.496461	0.651371	0.173417	0.449925	0.972073	0.365147
720	1-stearoyl-2-docosapentaenoyl-GPC (18:0/22:5n6)*	434	TRUE	-0.544142	-0.155248	0.0473373	0.0507875	0.290556	-0.000291415	0.0228332	0.435458	9.27309	0.121831	0.186547	0.751095	0.584456	0.274649	0.97326	0.00122718	0.87944	0.000296717	0.972073	0.580367
718	X - 24328	434	TRUE	1.14224	-0.00978522	0.0390321	0.601015	-0.565862	-0.0268839	-0.0037589	1.82331	-2.983	8.40421e-05	0.919701	0.75147	4.62663e-15	0.00999019	0.000180747	0.519337	0.441877	0.158731	0.972073	0.979216
501	N-methylproline	434	TRUE	-0.100977	0.0451698	-0.0476915	0.0646153	-0.0129156	0.00451209	-0.00656031	-8.09549	1.83463	0.779028	0.707226	0.754801	0.496509	0.962149	0.611994	0.36406	0.00585481	0.484189	0.972073	0.914393
519	1-eicosenoyl-GPC (20:1)*	434	TRUE	1.10898	0.1036	-0.0410603	0.15064	0.116005	0.0188264	-0.070578	4.6168	-0.473282	0.000383274	0.320827	0.756649	0.0677026	0.62326	0.0147266	2.22287e-29	0.0701062	0.835239	0.972073	0.695766
23	X - 12100	434	TRUE	-1.06548	0.306934	0.0464995	0.331952	-0.563468	0.00949993	0.00663958	8.11269	2.78092	0.00263697	0.00953541	0.757098	0.000387793	0.0354713	0.278048	0.350791	0.00503091	0.281444	0.972073	0.213593
771	4-hydroxyhippurate	434	TRUE	-0.265771	0.0291566	0.0516973	-0.052613	0.286277	0.00375759	0.00116015	-5.49428	1.80646	0.500036	0.824778	0.757187	0.613103	0.336733	0.699671	0.883457	0.0876251	0.529297	0.972073	0.953114
440	alpha-hydroxyisovalerate	434	TRUE	-0.889773	0.119584	-0.0463315	0.78913	-0.193912	0.00882612	0.0148599	-5.47116	2.04118	0.0117743	0.311059	0.757241	2.66244e-17	0.467908	0.312103	0.0362108	0.0577731	0.427804	0.972073	0.695477
695	X - 24455	434	TRUE	0.220592	0.168837	-0.0490342	0.140209	-0.682454	0.00144374	-0.0123766	-0.0662956	0.643173	0.557814	0.179487	0.758819	0.158292	0.0164991	0.876676	0.101566	0.982784	0.814594	0.972073	0.572416
426	stachydrine	434	TRUE	0.161955	0.0684846	0.0460727	0.103257	-0.145144	0.0109588	-0.0241507	-3.76033	1.46329	0.647415	0.562776	0.759125	0.269442	0.587815	0.210568	0.00068423	0.193287	0.570667	0.972073	0.827579
682	behenoyl sphingomyelin (d18:1/22:0)*	434	TRUE	-1.31652	0.238957	0.0477902	0.226261	-0.580573	0.0257998	0.00528247	0.825725	-1.79892	0.000344772	0.0519025	0.759458	0.0198271	0.0368775	0.00454602	0.474577	0.783311	0.502139	0.972073	0.341612
85	1-carboxyethylphenylalanine	434	TRUE	-2.44125	0.0381082	-0.041454	0.385983	0.66255	0.0191982	0.0512934	-4.1919	-4.2171	2.86793e-14	0.72244	0.760893	5.27971e-06	0.00635309	0.0155524	1.788e-15	0.109688	0.0714522	0.972073	0.919469
487	3-hydroxyisobutyrate	434	TRUE	-0.763486	0.0594745	0.0446844	0.374455	0.194706	0.00238631	0.0181469	-5.57183	-2.67163	0.0274148	0.607167	0.760963	4.18912e-05	0.457014	0.780332	0.00904866	0.0486245	0.289551	0.972073	0.852698
394	trigonelline (N'-methylnicotinate)	434	TRUE	0.245156	0.0255257	-0.0435054	-0.187659	-0.43761	0.0217317	-0.0372126	14.3477	-0.836247	0.468567	0.821335	0.761787	0.0356188	0.0871073	0.00934085	4.30024e-08	2.02844e-07	0.734395	0.972073	0.953114
518	X - 23636	434	TRUE	0.126757	0.0693116	-0.0457489	0.371372	-0.0329184	-0.00899285	-0.00654946	2.13835	-4.78963	0.722019	0.560488	0.762191	7.89701e-05	0.902763	0.307209	0.360053	0.462194	0.065075	0.972073	0.827579
788	1-(1-enyl-stearoyl)-2-oleoyl-GPE (P-18:0/18:1)	434	TRUE	-0.430962	0.387745	-0.0447845	0.176481	0.0964115	0.0294989	-0.0271464	-6.47429	5.82611	0.217377	0.000896798	0.762577	0.0557356	0.71518	0.000635826	0.000109363	0.0231949	0.0221127	0.972073	0.0618101
664	1-stearyl-2-docosapentaenoyl-GPC (O-18:0/22:5n3)*	434	TRUE	0.92342	0.0637299	0.0484536	0.196288	-0.172646	-0.00549974	-0.0249538	8.12404	2.3624	0.0156486	0.617667	0.765022	0.0516785	0.550135	0.560313	0.00114537	0.0091865	0.39613	0.972073	0.859363
355	1-(1-enyl-stearoyl)-2-oleoyl-GPC (P-18:0/18:1)	434	TRUE	0.800546	0.286049	0.0406339	-0.113169	-0.58065	0.0279195	-0.0692023	-2.57138	5.9763	0.0127525	0.00774406	0.765755	0.182386	0.0169043	0.000441312	8.20324e-27	0.327063	0.0107256	0.972073	0.198248
33	X - 21310	434	TRUE	0.325372	0.136681	0.0459805	0.169192	0.0651113	-0.00494096	-0.00991799	6.02337	-4.14571	0.376688	0.266469	0.768439	0.0816925	0.815042	0.587066	0.179692	0.0449796	0.122177	0.972073	0.667515
357	X - 24699	434	TRUE	-0.722969	0.0306999	0.0374591	1.17143	-0.369301	0.0155294	-0.0204779	3.22874	4.85843	0.0159181	0.759351	0.768469	1.60425e-49	0.103439	0.0361747	0.000673845	0.187179	0.0262011	0.972073	0.931092
406	choline	434	TRUE	-0.621056	-0.00545684	0.0430551	0.17142	-0.0126151	-0.00318019	0.0156693	-1.12352	-0.397033	0.0718564	0.962253	0.768689	0.0598858	0.961438	0.709229	0.0237425	0.68995	0.874525	0.972073	0.989872
646	(S)-a-amino-omega-caprolactam	434	TRUE	-1.28381	0.0654131	-0.0452776	0.524892	-0.625266	0.0189905	0.00652559	6.28723	0.824576	0.000416833	0.590513	0.769264	4.63513e-08	0.0230313	0.0346863	0.37175	0.0342286	0.75575	0.972073	0.84386
747	N6-acetyllysine	434	TRUE	-0.910287	0.135525	-0.0457213	0.0825156	0.135157	0.0167928	0.00216345	10.539	-1.80456	0.0132279	0.269688	0.769312	0.395008	0.626654	0.064447	0.769378	0.000441305	0.500305	0.972073	0.667515
36	1-(1-enyl-stearoyl)-2-arachidonoyl-GPC (P-18:0/20:4)	434	TRUE	0.00727886	0.0411444	-0.0475544	0.523498	-0.34715	0.0030131	-0.0127406	-5.14028	9.38327	0.985025	0.75088	0.772586	3.17996e-07	0.236523	0.753271	0.101879	0.104415	0.000898908	0.972073	0.929496
3	orotate	434	TRUE	-0.479275	-0.0799577	-0.0431573	0.178073	-0.0478184	0.0117935	-0.00222414	-2.68087	-5.26208	0.177601	0.500923	0.774798	0.0578168	0.858826	0.17956	0.755409	0.355566	0.0422281	0.972073	0.797205
825	asparagine	434	TRUE	1.23733	-0.000806739	0.0460531	0.15773	-0.16418	0.00144881	-0.0481352	3.05537	2.60926	0.0012335	0.99497	0.776859	0.118785	0.570772	0.878355	3.88657e-10	0.328363	0.349781	0.972073	0.997683
64	X - 11632	434	TRUE	0.0507919	-0.231317	0.0433604	0.154976	0.387077	0.003949	-0.00894907	5.95016	-3.70315	0.889178	0.0575684	0.779211	0.107351	0.160254	0.661175	0.221544	0.0455231	0.16327	0.972073	0.363249
98	N-formylmethionine	434	TRUE	-0.759815	0.096643	0.044032	0.208799	-0.423995	0.00938059	0.00360298	2.95649	0.168751	0.0415006	0.437826	0.7807	0.0338741	0.132529	0.308604	0.630302	0.331191	0.95046	0.972073	0.766195
801	arachidonate (20:4n6)	434	TRUE	-0.0608602	-0.180063	-0.0389031	0.244969	0.161422	0.00463107	-0.0102266	-0.10589	5.10846	0.8534	0.101851	0.780729	0.00484969	0.51693	0.569464	0.122102	0.968582	0.0332997	0.972073	0.45025
872	carotene diol (2)	434	TRUE	1.22395	0.10439	-0.0396529	-0.185308	-0.727666	0.0145068	-0.0596376	-6.70372	5.87483	0.000291811	0.355215	0.782101	0.0377919	0.00440182	0.0823928	1.51622e-18	0.0150731	0.0170301	0.972073	0.719713
286	glycine	434	TRUE	1.15505	0.0258064	-0.0421438	-0.245931	-0.496923	0.00175461	-0.0458837	6.71242	1.22691	0.00130253	0.829789	0.782171	0.0095183	0.067363	0.843352	2.0187e-10	0.0220689	0.63928	0.972073	0.953193
239	1-oleoyl-2-docosahexaenoyl-GPC (18:1/22:6)*	434	TRUE	0.914084	0.115569	0.0399392	-0.171261	-0.165599	0.0268693	-0.0709769	-0.270826	2.36713	0.00725837	0.309762	0.782198	0.0567751	0.520119	0.00140952	3.06399e-25	0.922371	0.34004	0.972073	0.695477
757	1-stearoyl-2-oleoyl-GPC (18:0/18:1)	434	TRUE	-0.742168	0.314016	-0.0409996	-0.0512024	0.456365	0.0413894	-0.0337554	4.72651	5.65506	0.0338536	0.00722223	0.78236	0.579307	0.0844761	1.69177e-06	1.54685e-06	0.09784	0.0265107	0.972073	0.190327
116	glycerate	434	TRUE	0.142988	0.107745	-0.0427315	-0.0574174	-0.950694	0.0308464	-0.0445232	2.81444	3.47044	0.695046	0.376735	0.782473	0.551058	0.000567718	0.000623227	1.21858e-09	0.344517	0.191663	0.972073	0.731383
392	malate	434	TRUE	-0.0575715	0.00210612	0.0409158	0.203907	0.00611317	0.014581	-0.0235849	0.314171	2.18055	0.870309	0.98574	0.784502	0.0285228	0.981711	0.0943549	0.000867674	0.913085	0.396106	0.972073	0.996683
800	ceramide (d16:1/24:1, d18:1/22:1)*	434	TRUE	-1.77134	0.149934	0.041933	0.134661	0.359147	0.0359653	0.00809344	5.30407	-2.18388	1.60889e-06	0.224338	0.788976	0.167219	0.198379	8.13073e-05	0.275108	0.0784458	0.417001	0.972073	0.638117
106	1-(1-enyl-stearoyl)-2-arachidonoyl-GPE (P-18:0/20:4)*	434	TRUE	-0.542088	0.206649	0.0427375	0.476524	-0.149425	0.0129926	-0.00559529	-7.27369	7.33234	0.151015	0.101416	0.789622	1.7478e-06	0.600693	0.163817	0.460524	0.0182547	0.00769008	0.972073	0.45025
525	X - 23639	434	TRUE	0.487538	0.0564663	0.0391502	0.119531	0.170927	0.00919629	-0.0419824	9.48886	-0.553703	0.160049	0.626325	0.790333	0.19206	0.514841	0.283676	1.7052e-09	0.000808787	0.826682	0.972073	0.863468
439	uracil	434	TRUE	-0.0760472	0.229613	0.041725	0.298098	-0.152085	0.00574905	-0.00864635	-1.95481	-1.36547	0.837753	0.0643007	0.79118	0.0023663	0.588155	0.531142	0.246367	0.519038	0.613873	0.972073	0.381313
20	X - 11530	434	TRUE	0.116565	-0.0864158	0.0409749	0.601791	-0.000512409	0.0115605	-0.0301869	-4.60746	-3.14142	0.749713	0.479126	0.791561	4.44391e-10	0.99852	0.200551	3.8963e-05	0.122398	0.238071	0.972073	0.780835
26	3-methylglutaconate	434	TRUE	-0.588592	-0.0536346	0.0369824	-0.246706	0.384828	0.0195517	-0.00718349	8.17225	-1.79089	0.0758599	0.628341	0.792649	0.00483182	0.124834	0.0170487	0.28069	0.00253142	0.458551	0.972073	0.863487
332	androsterone sulfate	434	TRUE	1.2364	-0.111665	0.0340835	0.425798	-0.250823	-0.0254237	-0.00809529	-7.64624	-7.09292	5.9278e-05	0.277806	0.794179	1.6271e-07	0.281375	0.000836063	0.190487	0.00234735	0.00157043	0.972073	0.677002
855	docosahexaenoylcholine	434	TRUE	0.00763068	0.165267	-0.0386255	0.0571061	-0.474319	0.0255507	-0.0426345	-1.59435	3.90363	0.982581	0.157073	0.794513	0.536042	0.0727214	0.00310093	1.24887e-09	0.576265	0.125345	0.972073	0.543387
617	sphingomyelin (d18:2/24:1, d18:1/24:2)*	434	TRUE	-0.0690849	0.208371	-0.0379939	-0.0960961	-0.937835	0.00606658	-0.0072072	-5.53973	0.970506	0.841508	0.0711084	0.7955	0.292147	0.000331236	0.477461	0.298943	0.0494879	0.699873	0.972073	0.394183
458	caprylate (8:0)	434	TRUE	0.858404	0.1832	0.0402619	-0.259984	-0.29643	-0.00285651	-0.0230646	-2.70339	1.98225	0.0208678	0.140086	0.798427	0.00804674	0.291422	0.755775	0.0019953	0.372728	0.464083	0.972073	0.509899
820	(N(1) + N(8))-acetylspermidine	434	TRUE	-0.0381784	0.258961	0.0421081	0.516963	-0.38049	-0.0182714	0.0107199	2.35906	2.53304	0.921753	0.0461853	0.798477	4.72278e-07	0.195501	0.0571992	0.169674	0.45715	0.371148	0.972073	0.328429
454	4-acetamidobutanoate	434	TRUE	-0.723718	0.271317	-0.036894	0.218048	0.172596	0.0108598	-0.0044245	2.13342	-0.663607	0.0336201	0.0171522	0.798527	0.0153379	0.50285	0.197131	0.517805	0.442923	0.789207	0.972073	0.254118
839	octadecadienedioate (C18:2-DC)*	434	TRUE	1.8513	-0.190969	-0.0417334	-0.056969	0.192544	-0.0190272	-0.03611	0.209379	-0.395031	1.59161e-06	0.138485	0.798741	0.575932	0.509216	0.0459817	3.14488e-06	0.946982	0.888237	0.972073	0.508534
341	X - 11299	434	TRUE	0.081374	-0.249575	-0.0386238	0.0881305	0.150287	0.00526094	-0.00984369	11.7927	5.47059	0.820001	0.0367695	0.799084	0.350655	0.578413	0.551746	0.17052	5.3512e-05	0.0357971	0.972073	0.300873
844	1-palmitoylglycerol (16:0)	434	TRUE	-1.11148	0.116935	-0.044392	0.13316	-0.104082	0.0101383	0.025404	-8.66876	-4.15109	0.00686644	0.39475	0.799149	0.219991	0.737823	0.318499	0.00209524	0.0097979	0.165912	0.972073	0.744623
329	cyclo(ala-pro)	434	TRUE	0.0667753	0.153107	0.040952	0.444327	0.0577018	-0.0126047	0.00109403	0.248279	0.669786	0.860717	0.228642	0.799804	9.79073e-06	0.841096	0.180269	0.886183	0.936299	0.809154	0.972073	0.640888
750	stearidonate (18:4n3)	434	TRUE	0.501534	-0.303763	0.0398441	-0.385538	0.328091	-0.0114079	-0.00220159	3.31959	1.53603	0.175744	0.0141303	0.799879	8.08423e-05	0.241499	0.212786	0.767277	0.272254	0.569316	0.972073	0.241797
195	N-acetyl-beta-alanine	434	TRUE	-0.27643	0.182752	0.0388513	0.605985	0.541783	0.000220628	-0.00155282	2.20012	-0.702478	0.444324	0.13022	0.799989	2.14494e-10	0.0474323	0.980296	0.830591	0.455776	0.789661	0.972073	0.5054
189	pyroglutamine*	434	TRUE	0.796006	-0.200212	-0.0309941	1.30742	-0.304914	-0.00787061	-0.0362148	10.1807	5.74349	0.00582712	0.0379574	0.800249	6.0566e-66	0.16251	0.270037	4.2056e-10	1.55815e-05	0.00632907	0.972073	0.300972
397	glycosyl-N-palmitoyl-sphingosine (d18:1/16:0)	434	TRUE	-1.13973	0.370255	-0.0399564	0.183919	-0.695488	0.0329631	-0.00585595	2.82405	6.57883	0.00226825	0.00300207	0.800874	0.062091	0.013768	0.000354537	0.434827	0.354114	0.0156023	0.972073	0.100885
227	1-linoleoyl-GPG (18:2)*	434	TRUE	0.0190577	-0.109296	0.0405036	0.149435	0.243491	-0.0173015	0.0208053	-1.55985	-0.418989	0.960394	0.394095	0.803569	0.140291	0.40148	0.0681721	0.0069481	0.61853	0.880905	0.972073	0.744623
736	1-palmitoyl-GPC (16:0)	434	TRUE	-0.0185263	0.10036	-0.0356683	0.368387	0.053043	0.0261725	-0.0405971	5.66109	-3.16098	0.95638	0.375267	0.803996	3.80346e-05	0.835945	0.00177149	2.40311e-09	0.0406038	0.200305	0.972073	0.731366
220	1-stearoyl-2-linoleoyl-GPE (18:0/18:2)*	434	TRUE	-1.56333	0.265145	0.0393282	-0.382893	0.541395	0.0361502	0.0132719	-1.92365	-5.40424	3.28524e-05	0.0350676	0.805524	0.000117155	0.0572111	0.000102387	0.0791942	0.531318	0.0488395	0.972073	0.300873
157	1-dihomo-linolenoyl-GPE (20:3n3 or 6)*	434	TRUE	-1.06512	0.0707747	0.037521	-0.0949093	0.767585	0.0229982	0.00628017	8.01216	-2.52944	0.0030436	0.555717	0.805671	0.317296	0.00474442	0.00963837	0.384317	0.00631807	0.334186	0.972073	0.827114
2	X - 16397	434	TRUE	-0.437089	-0.137769	-0.0383177	0.442591	0.15077	-0.00217496	0.00426382	4.07547	-1.91607	0.234648	0.26231	0.806036	5.17152e-06	0.587753	0.810912	0.563765	0.174605	0.474641	0.972073	0.663925
84	myristoyl-linoleoyl-glycerol (14:0/18:2) [1]*	434	TRUE	-2.06484	0.0112446	0.0357814	0.113368	0.569531	0.0254446	0.0407324	2.4908	-4.80697	4.30834e-09	0.923769	0.810481	0.222094	0.0322202	0.00341901	8.04727e-09	0.385534	0.0606694	0.972073	0.979579
751	guaiacol sulfate	434	TRUE	0.139872	-0.0660387	0.0344758	0.257107	0.172228	0.00515063	-0.0220375	9.62448	-1.04551	0.68194	0.562593	0.811836	0.00433101	0.504595	0.541516	0.00130463	0.000551098	0.674215	0.972073	0.827579
597	2-methylbutyrylcarnitine (C5)	434	TRUE	-1.13114	0.0324573	-0.0314947	1.10856	0.0867798	-0.00684444	0.0312475	-4.64089	0.668081	0.000300285	0.756253	0.812488	4.75213e-41	0.713811	0.376183	6.61175e-07	0.0692121	0.769518	0.972073	0.929496
372	4-vinylphenol sulfate	434	TRUE	0.20222	-0.0263007	0.0361648	0.198353	0.488085	-0.00245423	-0.00949058	9.50903	0.0560185	0.574056	0.826838	0.81273	0.036792	0.0728158	0.782564	0.189018	0.00120368	0.982952	0.972073	0.953114
349	4-hydroxyphenylpyruvate	434	TRUE	-1.31687	0.071006	0.0338043	-0.059224	0.498336	0.00492462	0.0372038	-1.66811	2.15711	0.00010499	0.53142	0.814476	0.508833	0.052263	0.557324	4.86368e-08	0.547227	0.383259	0.972073	0.813058
436	X - 24544	434	TRUE	1.33123	-0.0415742	0.0297903	0.781022	-0.608122	-0.0279336	-0.00833853	-3.62778	-2.40679	8.62511e-06	0.677578	0.81449	4.8075e-23	0.00719905	0.000158869	0.165267	0.137462	0.269672	0.972073	0.894124
264	6-hydroxyindole sulfate	434	TRUE	0.111994	0.11688	-0.0352385	0.30454	-0.147491	-0.00395067	-0.00517532	8.60641	-3.30222	0.75398	0.327722	0.816232	0.00124869	0.585225	0.654694	0.470854	0.0031735	0.204765	0.972073	0.69839
221	X - 21364	434	TRUE	0.25019	0.0503507	0.0337972	0.93967	-0.933999	-0.0232094	0.0177759	-2.75361	-1.9294	0.469721	0.6633	0.817972	8.38647e-25	0.000358665	0.00666461	0.010543	0.329686	0.444234	0.972073	0.885718
78	2-hydroxystearate	434	TRUE	-0.677301	0.037945	0.033257	0.244839	-0.32326	0.0226567	-0.014569	-1.51308	-0.417663	0.0474472	0.739648	0.818565	0.00664994	0.210911	0.0073041	0.0337466	0.587468	0.866782	0.972073	0.928248
554	betaine	434	TRUE	0.834815	0.0140652	0.0336715	0.817556	-0.22121	-0.0127614	-0.0338816	-9.27686	2.11481	0.01609	0.903417	0.819034	4.37741e-19	0.39903	0.136625	1.15126e-06	0.00105061	0.40275	0.972073	0.974473
65	X - 11880	434	TRUE	0.328534	-0.448805	-0.0316913	0.371533	0.134019	-0.0170479	0.0123984	-8.57853	-0.633276	0.317434	4.37349e-05	0.820207	1.85339e-05	0.58969	0.0358383	0.0603028	0.00138364	0.791431	0.972073	0.0130622
885	hexadecenedioate (C16:1-DC)*	434	TRUE	0.797211	0.0282673	-0.0361671	0.11354	-0.0362537	-0.0044421	-0.0226983	-2.17778	-1.19488	0.0339439	0.821967	0.820623	0.252664	0.898522	0.632606	0.00264274	0.477875	0.662693	0.972073	0.953114
222	X - 24588	434	TRUE	-1.64272	0.223665	-0.032926	0.896905	0.137995	0.00698978	0.0324904	2.36233	-1.91229	1.60955e-06	0.0506439	0.820733	3.4245e-23	0.59412	0.40893	2.31043e-06	0.398043	0.443478	0.972073	0.341612
105	1-stearoyl-GPE (18:0)	434	TRUE	-0.40797	0.130089	0.0342553	0.0732768	0.453921	0.0328823	-0.0334755	2.35787	-2.56428	0.255627	0.278055	0.822017	0.439349	0.094419	0.000209919	3.41013e-06	0.420886	0.326822	0.972073	0.677002
433	androstenediol (3alpha, 17alpha) monosulfate (2)	434	TRUE	1.96066	-0.0583735	-0.0272773	0.762022	-0.315326	-0.050483	0.000108131	6.54046	-0.562309	9.17646e-12	0.543524	0.82309	1.04851e-23	0.147017	1.22162e-12	0.985061	0.00532594	0.788416	0.972073	0.819586
804	1-ribosyl-imidazoleacetate*	434	TRUE	-0.873911	-0.00364151	-0.0338869	0.554165	0.17952	0.0103944	0.00260137	13.4897	2.90247	0.0159878	0.976035	0.825743	7.21312e-09	0.512837	0.246342	0.721035	5.21723e-06	0.272186	0.972073	0.994912
523	4-cholesten-3-one	434	TRUE	-1.77816	0.178597	0.0331809	0.130314	0.230558	0.0229007	0.0262663	0.622044	-1.41922	6.51388e-07	0.134825	0.826806	0.167307	0.393632	0.00953443	0.000252864	0.831154	0.585798	0.972073	0.5054
515	hexanoylcarnitine (C6)	434	TRUE	-0.518486	-0.102456	-0.0341399	0.360577	-0.135668	0.00128841	0.0060435	-12.9994	-0.313141	0.162611	0.408987	0.828455	0.000235316	0.628994	0.888363	0.417712	1.79585e-05	0.907867	0.972073	0.754456
356	2-hydroxyglutarate	434	TRUE	0.064643	0.174854	-0.0327577	0.16512	-0.473518	0.00662436	-0.0202231	-1.44544	4.53624	0.856317	0.142766	0.828801	0.0798399	0.0794566	0.452862	0.00479618	0.619901	0.0812234	0.972073	0.51373
626	ximenoylcarnitine (C26:1)*	434	TRUE	-1.22062	0.154117	-0.0315126	0.781433	-0.280982	0.0416348	-0.0276306	-5.42387	-0.235853	0.000387345	0.18001	0.82906	7.7111e-18	0.280064	9.74121e-07	6.34485e-05	0.0533941	0.925035	0.972073	0.572416
734	X - 21821	434	TRUE	0.682928	-0.0571817	0.0348646	-0.0635025	0.275587	-0.000419722	-0.0244126	9.14136	5.00838	0.0737274	0.654107	0.829643	0.528844	0.339951	0.964534	0.00145766	0.00336239	0.0719016	0.972073	0.883103
716	1-palmitoyl-2-palmitoleoyl-GPC (16:0/16:1)*	434	TRUE	-1.37038	0.222991	0.031092	-0.387935	0.430732	0.0259679	0.0196297	9.12579	-2.2004	5.75036e-05	0.0501327	0.829686	1.61076e-05	0.0945195	0.00204252	0.00411528	0.00103113	0.375391	0.972073	0.341612
123	palmitoleoyl-linoleoyl-glycerol (16:1/18:2) [1]*	434	TRUE	-1.70343	-0.0659268	-0.0312569	0.0755172	0.283901	0.0159227	0.0419659	1.85246	-6.57183	7.48858e-07	0.566599	0.83056	0.406084	0.275481	0.0613137	1.28031e-09	0.509746	0.00879945	0.972073	0.827579
415	sphingomyelin (d18:1/24:1, d18:2/24:0)*	434	TRUE	-0.235034	0.321571	0.0332658	0.076404	-0.597049	0.0182408	-0.0230108	-1.40978	0.496357	0.52207	0.00876978	0.830911	0.430619	0.0315272	0.0444382	0.00180461	0.638068	0.852819	0.972073	0.206782
742	X - 11441	434	TRUE	0.343264	-0.0970734	0.0332976	0.544099	-0.124705	0.00054168	-0.0247359	-4.76448	-3.50877	0.351102	0.430071	0.831197	2.1732e-08	0.654191	0.952531	0.000820898	0.112844	0.190882	0.972073	0.763123
177	glycerophosphoethanolamine	434	TRUE	-0.196387	0.00658674	0.0316773	0.24898	0.223687	0.00869587	-0.0102657	-2.51803	1.63425	0.57584	0.955222	0.831578	0.00722465	0.399423	0.316241	0.14535	0.379513	0.52289	0.972073	0.98751
693	3-(4-hydroxyphenyl)lactate	434	TRUE	-1.31526	0.15211	0.0307485	0.93122	-0.107601	-0.00117525	0.031981	-1.43485	4.54635	0.000115095	0.18202	0.831741	4.62118e-25	0.676546	0.889131	3.02912e-06	0.606283	0.0673627	0.972073	0.576289
430	X - 17676	434	TRUE	-0.412842	-0.0779999	-0.0305293	0.0904734	0.269102	-0.00158522	0.00897818	18.3307	-1.35698	0.222937	0.490799	0.831793	0.311762	0.293491	0.84984	0.186935	3.37079e-11	0.582503	0.972073	0.789507
683	X - 16087	434	TRUE	-2.25712	0.291716	-0.0298055	0.419292	0.3906	0.0278001	0.027838	6.1203	-6.40013	9.9915e-12	0.00847793	0.832241	1.67834e-06	0.11933	0.000694826	2.91583e-05	0.0237553	0.00808312	0.972073	0.205303
530	arachidoylcarnitine (C20)*	434	TRUE	-0.600044	0.10717	0.0292418	0.669119	-0.141957	0.0316703	-0.039612	-7.69053	-0.234219	0.067244	0.328044	0.833527	1.08638e-14	0.566982	9.32116e-05	1.7954e-09	0.00406079	0.921911	0.972073	0.69839
438	linoleoyl-linolenoyl-glycerol (18:2/18:3) [2]*	434	TRUE	-1.07025	-0.168873	0.0301809	0.23391	0.351095	0.00481658	0.0292632	1.364	-6.2114	0.0016215	0.136679	0.834073	0.00907987	0.171523	0.566045	1.77705e-05	0.622628	0.0120601	0.972073	0.5054
365	N-acetyltaurine	434	TRUE	-0.105714	-0.0468222	-0.0302584	0.341	0.137984	0.00452525	-0.0105089	4.41055	7.57168	0.756324	0.68087	0.834195	0.000150086	0.592239	0.590999	0.124551	0.112726	0.00228822	0.972073	0.89583
578	1-palmitoyl-2-oleoyl-GPI (16:0/18:1)*	434	TRUE	-1.23588	0.315091	-0.0319503	-0.36301	0.0958719	0.0362393	0.00346681	9.18236	0.942991	0.000667495	0.00943455	0.835769	0.000153638	0.727063	5.42744e-05	0.634612	0.00195448	0.721633	0.972073	0.213593
363	theobromine	434	TRUE	-0.199219	-0.0290134	-0.0326147	-0.343334	-0.221563	0.00427244	0.00706762	11.4964	-0.579097	0.591102	0.814886	0.83579	0.000453955	0.429473	0.641131	0.342622	0.000145833	0.830308	0.972073	0.953114
273	carotene diol (3)	434	TRUE	0.858293	0.163797	-0.0301852	0.00628514	-0.5516	0.00817944	-0.0405676	-1.1327	6.63259	0.0126865	0.154632	0.836336	0.944891	0.0341615	0.336582	4.47089e-09	0.686974	0.00821409	0.972073	0.537018
859	3-methylglutarylcarnitine (2)	434	TRUE	-0.949237	0.0529027	0.02836	-0.200315	0.400161	0.019568	0.00406126	14.8902	-5.69981	0.00355645	0.626865	0.837376	0.0198194	0.104167	0.0150541	0.534607	2.12056e-08	0.0163048	0.972073	0.863468
281	phosphatidylcholine (18:0/20:2, 20:0/18:2)*	434	TRUE	-0.61403	0.282788	0.0308215	-0.347395	0.197609	0.0308134	-0.0170218	4.70598	-1.65913	0.0865945	0.0181959	0.839355	0.000240841	0.465844	0.000503322	0.0180149	0.107627	0.525158	0.972073	0.258786
368	histidine	434	TRUE	0.911504	0.0876894	0.0300478	-0.0725335	0.108156	0.00162853	-0.0297246	-0.227135	4.16994	0.0092482	0.453696	0.839756	0.432806	0.682994	0.850777	2.3775e-05	0.936671	0.102261	0.972073	0.774207
417	21-hydroxypregnenolone disulfate	434	TRUE	1.22769	0.0526066	-0.0262525	0.626112	-0.810294	-0.0282304	-0.00152954	0.242399	-0.473253	7.13243e-05	0.610555	0.841354	1.70043e-14	0.000527357	0.000219999	0.805385	0.923464	0.833584	0.972073	0.853444
8	X - 11442	434	TRUE	0.34493	-0.0931176	0.0314739	0.558282	-0.142599	0.000441541	-0.0250412	-4.57596	-3.50494	0.353333	0.453388	0.841799	1.27508e-08	0.61188	0.961664	0.000793638	0.131441	0.195585	0.972073	0.774207
506	2-oleoyl-GPC (18:1)*	434	TRUE	0.218697	0.126206	-0.0280209	0.36713	0.156752	0.0350171	-0.0637392	7.51432	2.16774	0.509458	0.254631	0.842108	2.7395e-05	0.53181	1.92663e-05	1.0373e-21	0.00548968	0.369549	0.972073	0.663009
690	1-stearoyl-GPC (18:0)	434	TRUE	0.101717	0.0952551	-0.0299869	0.428703	-0.108526	0.022464	-0.0447198	5.95198	0.437759	0.775718	0.424651	0.843088	5.42511e-06	0.687714	0.0109121	4.46799e-10	0.0411183	0.866377	0.972073	0.762442
158	imidazole lactate	434	TRUE	0.40167	0.165011	0.0325688	0.273694	-0.47069	-0.00177268	-0.0174051	10.9953	0.243576	0.302862	0.205307	0.843918	0.0078411	0.110368	0.854048	0.026219	0.000549949	0.931673	0.972073	0.609401
686	5-methyluridine (ribothymidine)	434	TRUE	0.531587	0.0090151	-0.0298523	0.590596	-0.339287	0.00390627	-0.0333757	3.71564	0.981009	0.141024	0.940454	0.845539	5.87842e-10	0.214111	0.661678	4.19145e-06	0.207507	0.709314	0.972073	0.983795
112	X - 12101	434	TRUE	0.136615	0.15373	0.0290904	-0.0206208	-0.00154118	-0.00159744	-0.0103173	-1.01769	-0.32039	0.698909	0.192768	0.846093	0.825005	0.995396	0.854819	0.145818	0.724097	0.900934	0.972073	0.591508
816	ceramide (d18:1/20:0, d16:1/22:0, d20:1/18:0)*	434	TRUE	-1.93133	0.215552	-0.0306652	0.116936	0.574815	0.0311079	0.0187551	0.258792	-3.8528	2.34437e-07	0.0842483	0.846608	0.235837	0.0418898	0.000755223	0.0124307	0.93237	0.156995	0.972073	0.412407
314	N1-methyladenosine	434	TRUE	-1.41092	0.105038	0.0285983	0.389937	-0.0739349	0.0118779	0.020503	7.15705	-2.43301	5.63369e-05	0.369585	0.847431	2.49014e-05	0.780177	0.170144	0.00356605	0.0123179	0.340539	0.972073	0.729401
783	linoleoyl-linoleoyl-glycerol (18:2/18:2) [1]*	434	TRUE	-1.10309	-0.200308	0.0278434	0.293088	0.14928	0.00210172	0.0367482	-2.8432	-8.22558	0.00133811	0.0813351	0.848671	0.00124755	0.565956	0.804715	1.03366e-07	0.311127	0.00102926	0.972073	0.40713
323	1-oleoylglycerol (18:1)	434	TRUE	-1.66613	0.27268	0.028355	0.361901	0.35216	0.0345955	0.000160216	0.0146985	-3.1615	2.22529e-06	0.0204851	0.849479	9.91898e-05	0.185994	7.04222e-05	0.981925	0.99592	0.217898	0.972073	0.276897
694	lactosyl-N-nervonoyl-sphingosine (d18:1/24:1)*	434	TRUE	1.00055	0.15373	-0.02621	0.120094	-0.407396	0.00730271	-0.046337	10.4167	2.89594	0.00253002	0.165024	0.85211	0.169842	0.103973	0.372578	3.3248e-12	0.000117429	0.230369	0.97384	0.563924
340	1-palmitoyl-2-oleoyl-GPC (16:0/18:1)	434	TRUE	-0.965954	0.245152	-0.0280543	-0.0202839	0.229994	0.0469512	-0.0292152	2.39935	1.66119	0.0071813	0.0411884	0.854008	0.830705	0.397321	1.24801e-07	5.1562e-05	0.413328	0.525793	0.974766	0.305869
388	X - 15666	434	TRUE	0.0170281	0.0709572	-0.0301792	0.10959	-0.47812	0.0152623	-0.0213955	2.27245	1.51024	0.965365	0.588203	0.85608	0.289886	0.106918	0.115373	0.00659689	0.477767	0.597164	0.975876	0.843212
197	X - 24295	434	TRUE	-0.46802	-0.316342	-0.0262929	0.428287	0.215644	0.00619693	0.0112489	-2.8739	-2.75815	0.17828	0.00647784	0.858552	3.08422e-06	0.41214	0.470883	0.107202	0.311252	0.276331	0.975876	0.187231
888	andro steroid monosulfate C19H28O6S (1)*	434	TRUE	0.79994	-0.0399626	0.0229917	0.58874	-0.505108	-0.0247467	0.00642842	-3.37181	0.964653	0.00956234	0.698483	0.860669	5.09353e-13	0.0304931	0.00118256	0.299809	0.180873	0.668056	0.975876	0.9074
880	X - 21410	434	TRUE	0.529342	0.0451527	0.0228353	0.557397	-0.251422	-0.0209431	0.0076892	-2.67991	-0.164459	0.0877043	0.662929	0.862172	9.75682e-12	0.283486	0.00627099	0.216802	0.28955	0.941961	0.975876	0.885718
25	S-adenosylhomocysteine (SAH)	434	TRUE	-1.06486	0.100536	-0.0250696	0.606991	0.432916	-0.00130268	0.0277176	0.709289	-1.23547	0.00180056	0.377876	0.86251	1.60254e-11	0.0933494	0.877234	5.22565e-05	0.798956	0.619219	0.975876	0.731383
890	guanidinoacetate	434	TRUE	0.672985	-0.295353	0.026187	0.685359	-0.191142	-0.00825141	-0.022311	1.54021	3.45162	0.0603049	0.0136232	0.863224	4.31084e-13	0.480477	0.351432	0.00192908	0.598403	0.186109	0.975876	0.241797
398	hexadecanedioate (C16-DC)	434	TRUE	0.694199	-0.103267	-0.0270463	-0.0917441	0.0873965	0.000913529	-0.0256494	2.55151	-0.985855	0.0646056	0.410735	0.865262	0.354993	0.758352	0.921629	0.000674524	0.405357	0.718742	0.975876	0.754456
585	arginine	434	TRUE	0.441149	0.254188	0.0245816	0.166545	-0.143112	-0.00915497	-0.0115137	-9.32472	-0.570939	0.200614	0.0273395	0.866532	0.0672717	0.583	0.282608	0.0962869	0.00091962	0.820192	0.975876	0.300873
243	1-palmityl-2-oleoyl-GPC (O-16:0/18:1)*	434	TRUE	2.09184	0.000960582	0.0226251	-0.25972	-0.533847	-0.00273474	-0.0656226	2.78081	4.5874	4.8421e-11	0.992791	0.866886	0.00198784	0.0264808	0.728001	9.50249e-25	0.284217	0.0478257	0.975876	0.997683
122	X - 21834	434	TRUE	0.473186	0.0732175	-0.0254801	0.129649	0.11857	-0.00396878	-0.0135348	4.92997	6.05938	0.186778	0.541023	0.866948	0.170713	0.661793	0.654183	0.0600805	0.0919845	0.0203452	0.975876	0.819586
54	X - 21285	434	TRUE	1.24947	-0.0779334	0.0254024	0.59217	-0.126003	-0.0338513	-0.000146831	-2.71897	-4.21378	0.000471753	0.514037	0.866961	3.48284e-10	0.641047	0.000127039	0.983678	0.351299	0.105645	0.975876	0.806616
526	N1-methylinosine	434	TRUE	-1.3944	0.0165926	0.0247273	0.331173	-0.150015	-0.000712099	0.0377119	8.22155	0.69949	7.17368e-05	0.887571	0.868208	0.000355135	0.572176	0.934622	8.9578e-08	0.00413165	0.784603	0.976008	0.974473
462	p-cresol glucuronide*	434	TRUE	0.520872	0.112753	-0.0250979	-0.225551	0.135023	0.00167313	-0.0264172	11.6148	-3.59491	0.147197	0.347767	0.869257	0.0174462	0.619284	0.850591	0.000251819	7.50477e-05	0.169799	0.976008	0.718036
125	1-methylnicotinamide	434	TRUE	0.487167	-0.0289802	-0.0243445	-0.232319	-0.278057	0.00805785	-0.0242427	3.27003	-4.49642	0.172052	0.807931	0.872227	0.0136464	0.302678	0.360812	0.000715132	0.261445	0.0836832	0.978113	0.953114
834	palmitoyl-arachidonoyl-glycerol (16:0/20:4) [2]*	434	TRUE	-2.20441	0.0433022	0.0228042	0.422972	0.540178	0.0229636	0.0427708	-1.90015	3.78703	8.1129e-11	0.702472	0.874116	2.33136e-06	0.0352285	0.0061685	3.42939e-10	0.492567	0.125517	0.978113	0.910875
627	X - 21471	434	TRUE	-0.103674	0.0280104	-0.0224207	0.177942	1.22274	-0.0138124	0.0207995	-9.09407	3.12177	0.756461	0.802021	0.874407	0.0438053	1.3198e-06	0.094608	0.00194834	0.000860112	0.200015	0.978113	0.953114
837	glycodeoxycholate 3-sulfate	434	TRUE	0.932434	-0.088076	-0.0244	-0.116308	-0.276109	-0.00293275	-0.0237997	-3.20976	-1.83888	0.0143696	0.488995	0.880004	0.247514	0.337804	0.755436	0.00186462	0.301929	0.507663	0.983147	0.788021
763	2-aminobutyrate	434	TRUE	-0.375965	0.0388363	-0.0226658	0.390141	-0.262117	-0.00187912	0.00640701	-10.1605	2.79676	0.314346	0.755797	0.886327	7.67855e-05	0.353625	0.838786	0.393252	0.000864972	0.304371	0.984133	0.929496
146	7-methylguanine	434	TRUE	-0.0968746	-0.0686082	-0.0212488	0.308143	-0.428921	-0.0133058	0.0145273	2.38888	0.934193	0.786338	0.565654	0.888562	0.00109272	0.112501	0.132007	0.0429702	0.412848	0.719806	0.984133	0.827579
854	1-(1-enyl-stearoyl)-2-docosahexaenoyl-GPC (P-18:0/22:6)*	434	TRUE	0.714711	0.196764	0.0208695	0.132193	-0.422568	0.0159225	-0.053814	-11.4505	8.39461	0.0425926	0.0948308	0.889026	0.155499	0.112899	0.0676201	2.91951e-14	6.89903e-05	0.00108211	0.984133	0.437291
652	myristoyl dihydrosphingomyelin (d18:0/14:0)*	434	TRUE	-1.25684	0.198003	0.0212234	-0.291015	-0.414873	0.0331028	0.00539155	7.99329	0.151156	0.000496744	0.100646	0.889773	0.00225891	0.128486	0.000206661	0.456972	0.00666131	0.954166	0.984133	0.45025
741	creatinine	434	TRUE	-0.341638	-0.164624	-0.0170349	1.22026	-0.349589	0.00772099	-0.0157403	3.80453	6.12587	0.241515	0.0912582	0.890532	1.56253e-56	0.113016	0.284242	0.00721406	0.11008	0.00395254	0.984133	0.430355
722	iminodiacetate (IDA)	434	TRUE	0.245277	0.0393855	-0.0232852	0.105274	-0.057156	-0.0119772	0.00329483	-0.509685	-0.801986	0.540548	0.768711	0.891092	0.319837	0.850424	0.226668	0.682299	0.876196	0.783625	0.984133	0.935822
66	glutamine conjugate of C6H10O2 (2)*	434	TRUE	-0.64449	0.133915	-0.0202624	-0.155784	0.0256514	-0.00375095	0.0198768	-4.87503	-4.53923	0.0653552	0.251874	0.891393	0.0916025	0.922735	0.66436	0.00465667	0.0876958	0.0748914	0.984133	0.663009
631	aconitate [cis or trans]	434	TRUE	-1.52062	0.090852	0.0200931	0.0250176	0.41233	0.016461	0.0178221	-1.42963	-0.511518	1.37086e-05	0.436899	0.892282	0.78643	0.118947	0.0568597	0.0111603	0.616482	0.840906	0.984133	0.766069
817	benzoate	434	TRUE	-1.23995	0.0245191	-0.0205894	-0.0356534	-0.212626	0.018239	0.018786	-3.90856	-2.9756	0.000623395	0.839571	0.893494	0.70947	0.437878	0.0417573	0.00985502	0.186445	0.259878	0.984133	0.956008
853	oleoyl-linoleoyl-glycerol (18:1/18:2) [1]	434	TRUE	-1.60509	-0.0410437	0.0204531	0.391691	0.309984	0.018346	0.0295654	-0.746248	-6.62694	8.52104e-06	0.733381	0.89365	3.88432e-05	0.2556	0.0395452	4.44949e-05	0.799842	0.0116621	0.984133	0.926993
485	homocitrulline	434	TRUE	-0.306922	0.0590132	-0.0204478	0.268892	0.158806	0.0149962	-0.0152926	3.16151	1.85659	0.398826	0.627364	0.894611	0.00511877	0.563756	0.0953627	0.0363343	0.287012	0.483691	0.984133	0.863468
858	X - 24546	434	TRUE	1.47514	0.0142209	0.0165494	0.6217	-0.597144	-0.031126	-0.00327774	-8.64459	0.686937	9.14502e-07	0.887381	0.896726	4.6578e-15	0.00859271	2.78142e-05	0.587038	0.000424461	0.753735	0.984133	0.974473
460	X - 21736	434	TRUE	-1.62756	-0.0162926	-0.0198965	0.0764916	-0.105993	0.0231027	0.0189326	-8.38226	-1.12473	9.85285e-06	0.894658	0.898661	0.4314	0.703451	0.0111344	0.0104589	0.00528734	0.675071	0.984133	0.974473
732	glycosyl ceramide (d18:2/24:1, d18:1/24:2)*	434	TRUE	0.376478	0.366104	-0.0197285	0.00794566	-0.634637	0.00835077	-0.0282975	-3.71555	2.21522	0.305107	0.0028427	0.899215	0.934668	0.0222522	0.357423	0.000123991	0.214999	0.407619	0.984133	0.100885
669	glycosyl-N-behenoyl-sphingadienine (d18:2/22:0)*	434	TRUE	-0.662399	0.276534	-0.0196497	0.0346637	-0.517105	0.0285294	-0.0197289	-1.74724	1.04807	0.0718687	0.0245402	0.899861	0.721293	0.0631585	0.00171101	0.00760088	0.560809	0.695931	0.984133	0.300873
303	3-methyl-2-oxobutyrate	434	TRUE	-1.59383	-0.0185077	0.0189488	0.790457	0.181409	0.0155261	0.027769	-4.80021	-6.14095	7.20504e-06	0.876087	0.899942	3.49022e-17	0.499416	0.0769746	9.90329e-05	0.0977784	0.0176576	0.984133	0.973913
52	cholate	434	TRUE	-0.659585	0.235317	0.018021	0.23604	0.274454	0.010542	0.00451651	-7.17464	-3.4769	0.0536519	0.039395	0.901118	0.00891567	0.288354	0.212143	0.510601	0.0101293	0.162755	0.984133	0.304898
712	theophylline	434	TRUE	-0.449397	0.0664864	-0.0200398	-0.269487	0.100913	0.014973	-0.00191534	11.4584	-0.866638	0.239915	0.602874	0.901707	0.00760826	0.72712	0.113178	0.803058	0.000241731	0.755798	0.984133	0.849075
628	lignoceroylcarnitine (C24)*	434	TRUE	-1.21531	0.174645	-0.0184081	0.289917	0.0228751	0.0351804	-0.0119591	-5.74764	-3.99757	0.000597339	0.139897	0.902471	0.00192582	0.93191	5.8152e-05	0.0925761	0.0467111	0.121249	0.984133	0.509899
192	succinylcarnitine (C4-DC)	434	TRUE	-1.20456	0.0736998	0.0154636	0.595408	0.365574	0.00572959	0.0187954	7.55296	-0.35587	6.74019e-05	0.465605	0.904029	8.61533e-14	0.109738	0.443143	0.00195987	0.00220356	0.871642	0.984133	0.775513
113	glutamine	434	TRUE	0.917036	0.112918	-0.0182887	0.58916	-0.149913	-0.0114767	-0.0349081	3.04719	1.939	0.0108323	0.347799	0.904672	5.65029e-10	0.58176	0.197016	1.36859e-06	0.299616	0.459697	0.984133	0.718036
77	mannose	434	TRUE	-2.33164	0.206595	-0.0165936	0.111741	0.271891	0.00700202	0.0666269	0.114621	0.862976	1.34668e-12	0.0601503	0.905351	0.198189	0.274319	0.389071	6.31964e-24	0.965945	0.71879	0.984133	0.371687
201	2-palmitoyl-GPC (16:0)*	434	TRUE	-0.445251	0.0572831	0.0169165	0.336379	0.103579	0.0283249	-0.0286417	5.53575	-2.36699	0.191415	0.615006	0.90688	0.000185561	0.687777	0.000773252	2.86016e-05	0.0466118	0.340564	0.984133	0.856991
443	N-palmitoylglycine	434	TRUE	-0.154002	-0.212595	0.0175172	-0.179235	0.0501255	0.00998569	-0.00851733	-0.00113608	0.298185	0.663832	0.0725896	0.907248	0.0553953	0.851609	0.254234	0.231354	0.999687	0.908061	0.984133	0.395264
823	isoursodeoxycholate	434	TRUE	-0.637979	-0.0244502	-0.017564	0.215853	0.706171	0.00156024	0.0216001	-8.33309	-8.37561	0.0795085	0.840621	0.909417	0.0246424	0.010269	0.862263	0.00311552	0.00501692	0.00158216	0.985242	0.956008
546	phenylalanyltryptophan	434	TRUE	-0.91429	0.0683907	-0.0134899	0.0862931	0.0937841	0.0133508	0.0100333	0.634786	-4.3511	0.00138919	0.474251	0.911487	0.253148	0.664559	0.05895	0.080672	0.785688	0.0368159	0.985242	0.779896
429	(R)-3-hydroxybutyrylcarnitine	434	TRUE	-0.627111	0.0512215	-0.0155006	0.222175	0.0359165	-7.25853e-05	0.0146568	-9.63134	-2.22917	0.0604404	0.646304	0.912907	0.0117601	0.886925	0.992985	0.0288917	0.000411423	0.359727	0.985242	0.881413
602	X - 18922	434	TRUE	-0.315575	-0.0411844	0.0167215	0.195725	-0.223547	0.00481459	0.000250238	-6.29975	5.01463	0.395447	0.739995	0.915489	0.0459262	0.426028	0.599931	0.973235	0.03769	0.0638736	0.985242	0.928248
150	1-(1-enyl-palmitoyl)-2-myristoyl-GPC (P-16:0/14:0)*	434	TRUE	1.01148	0.0272753	0.0167496	-0.274714	-0.741037	0.00421642	-0.0344361	8.80383	8.26095	0.00654583	0.826331	0.91549	0.00515953	0.00843292	0.646551	4.03986e-06	0.00373917	0.0023074	0.985242	0.953114
422	cis-4-decenoate (10:1n6)*	434	TRUE	0.503353	-0.207299	-0.0164785	-0.0616623	-0.0961494	-0.0159479	0.00310688	-13.401	1.45982	0.17244	0.092675	0.916163	0.526721	0.730368	0.0803135	0.67498	8.58307e-06	0.587114	0.985242	0.434748
317	N-delta-acetylornithine	434	TRUE	0.28293	0.114305	-0.0154552	0.174476	0.0988451	0.0128203	-0.0332722	-1.99628	-3.7321	0.419183	0.328756	0.91717	0.0591978	0.708998	0.138633	2.24281e-06	0.485002	0.143651	0.985242	0.69839
714	1-stearoyl-2-linoleoyl-GPI (18:0/18:2)	434	TRUE	-0.870315	0.39747	-0.0156501	-0.491125	-0.212183	0.0342134	-0.00775246	2.69926	-3.64705	0.0147487	0.00086078	0.917693	1.87314e-07	0.431786	0.000105259	0.279462	0.35418	0.160833	0.985242	0.0618101
715	allantoin	434	TRUE	-0.934639	0.095284	0.015827	0.618082	-0.430262	0.0190518	-0.00493957	2.35963	0.462382	0.0100388	0.432226	0.918166	1.13398e-10	0.117068	0.0337472	0.498108	0.425883	0.861251	0.985242	0.763123
536	eicosapentaenoate (EPA; 20:5n3)	434	TRUE	0.054553	-0.0213951	-0.0138526	0.104495	0.00477892	0.0127353	-0.0289993	0.600602	3.16716	0.870609	0.848402	0.922348	0.237353	0.984946	0.123965	1.6234e-05	0.826113	0.194388	0.98849	0.958354
416	5alpha-androstan-3alpha,17beta-diol monosulfate (1)	434	TRUE	0.455347	-0.0737175	0.0137178	0.558849	-0.071058	-0.0212565	0.0107991	-8.90567	-9.35435	0.180104	0.5161	0.92418	4.64887e-10	0.782083	0.0113575	0.113452	0.0013196	0.000157531	0.98849	0.806791
513	1,5-anhydroglucitol (1,5-AG)	434	TRUE	0.691293	-0.498238	-0.0121971	0.517079	-0.595381	-0.020974	0.00411305	2.62254	3.83967	0.0265592	1.72315e-06	0.926518	3.32022e-10	0.0115384	0.00648112	0.511143	0.302639	0.090923	0.98849	0.00154394
305	branched chain 14:0 dicarboxylic acid**	434	TRUE	1.43169	-0.0494013	-0.0130886	-0.0845333	0.275253	0.00774863	-0.064076	4.52444	7.81493	2.97213e-05	0.666361	0.928315	0.35044	0.288433	0.360572	1.33903e-20	0.105969	0.00176106	0.98849	0.886134
62	glycodeoxycholate	434	TRUE	0.322428	-0.0137437	-0.0141974	-0.152395	-0.111705	0.000680485	-0.0108696	-6.79529	1.18187	0.387225	0.91218	0.928503	0.121676	0.692014	0.941148	0.146676	0.0255851	0.663606	0.98849	0.974473
614	N-acetylthreonine	434	TRUE	-0.589112	0.116861	0.0124791	0.713922	0.120142	-0.00214231	0.00943407	4.6878	3.33797	0.0736079	0.288254	0.928833	2.19231e-16	0.629479	0.792395	0.15372	0.0811538	0.164202	0.98849	0.68508
660	kynurenate	434	TRUE	-1.20552	-0.0246658	0.0128209	0.740111	-0.314935	0.00533458	0.0238978	4.11434	-0.585096	0.000384413	0.827906	0.929088	1.51221e-16	0.21999	0.525017	0.000457359	0.137673	0.81306	0.98849	0.953114
684	urate	434	TRUE	-1.32738	0.0113289	0.0111411	1.14509	-0.0488933	-0.0118381	0.0456893	-5.21518	-0.987896	9.00697e-06	0.909723	0.930019	1.12125e-47	0.828793	0.109184	2.76133e-14	0.0326027	0.650233	0.98849	0.974473
4	13-HODE + 9-HODE	434	TRUE	1.26735	-0.193344	0.0134637	-0.272933	-0.00903662	-0.0137046	-0.0232203	-1.84325	3.5387	0.00103193	0.134103	0.934518	0.00743785	0.975316	0.151104	0.00275549	0.558738	0.208593	0.991909	0.5054
810	thioproline	434	TRUE	-0.731018	-0.0823049	-0.0133555	0.483237	0.777182	0.00306835	0.0119562	4.85719	-1.71389	0.0599708	0.526256	0.93545	2.48665e-06	0.00818332	0.749415	0.125566	0.125739	0.545053	0.991909	0.810181
500	1-palmityl-2-palmitoyl-GPC (O-16:0/16:0)*	434	TRUE	1.32395	0.111891	0.0119207	-0.0803491	-0.567269	-0.0104753	-0.0254426	5.88987	2.66476	0.000225946	0.350978	0.937621	0.396612	0.0366547	0.237788	0.00041724	0.044431	0.30836	0.993036	0.719209
759	glutamine conjugate of C7H12O2*	434	TRUE	-0.927667	0.118626	-0.0113867	-0.0976492	0.09506	0.0086741	0.0149152	-2.01835	-3.70452	0.00863004	0.3149	0.939439	0.295086	0.721929	0.320463	0.0355042	0.483903	0.150074	0.993786	0.695477
198	N-acetyltyrosine	434	TRUE	-1.35147	0.186924	-0.0106905	0.229484	0.0240334	0.00590427	0.0283569	3.98861	5.31492	6.73731e-05	0.0990505	0.940774	0.0103781	0.925333	0.48119	3.13155e-05	0.149599	0.0314888	0.994025	0.449562
781	propionylcarnitine (C3)	434	TRUE	-1.71223	0.0658395	-0.00981124	1.11265	0.0734946	0.00834301	0.0288405	-6.55722	-1.90867	1.36086e-07	0.544221	0.94326	1.79e-38	0.764828	0.298833	9.86081e-06	0.0134105	0.420107	0.994742	0.819586
565	1-palmitoyl-2-linoleoyl-GPE (16:0/18:2)	434	TRUE	-1.16683	0.283252	0.0114325	-0.562387	0.473108	0.0309459	0.00917008	-4.04194	-7.31645	0.00235052	0.0271261	0.944001	2.81265e-08	0.102895	0.00109911	0.233913	0.196735	0.00885702	0.994742	0.300873
331	X - 12707	434	TRUE	-0.40812	-0.134051	-0.00982757	0.165853	-0.788893	0.0230035	-0.0266428	-2.69315	7.98585	0.222301	0.230319	0.944783	0.060333	0.00181145	0.00538703	7.27873e-05	0.32383	0.00104867	0.994742	0.640888
76	12,13-DiHOME	434	TRUE	2.01446	-0.0723136	0.0100939	-0.458902	-0.00313161	-0.0207355	-0.0379302	-2.10218	0.945482	1.00998e-08	0.538288	0.946062	7.70244e-07	0.990604	0.0170458	7.8267e-08	0.463917	0.71213	0.994919	0.817468
787	gamma-CEHC	434	TRUE	-0.017311	0.0316185	0.00971433	-0.0251801	0.126338	-0.0155371	0.0181449	-0.718675	-0.587698	0.961289	0.790796	0.948819	0.789179	0.639496	0.0780098	0.0113063	0.805023	0.821107	0.996517	0.949803
110	glycerophosphorylcholine (GPC)	434	TRUE	0.416729	-0.0266613	-0.00941878	0.221075	0.292934	0.00851155	-0.0321644	1.81663	3.63989	0.237968	0.821263	0.949879	0.0177423	0.27268	0.329511	5.75758e-06	0.528556	0.157225	0.996517	0.953114
553	argininate*	434	TRUE	-0.721196	0.114494	0.00880845	0.436164	0.29607	-0.00320361	0.0222434	2.96844	0.371299	0.0339495	0.313723	0.951326	1.18993e-06	0.249643	0.703128	0.00112721	0.284922	0.880901	0.996517	0.695477
327	glucuronate	434	TRUE	-0.557315	-0.0661748	0.00912988	0.138928	0.0868608	-0.00379571	0.0184235	8.81615	5.14283	0.135275	0.595627	0.954015	0.158506	0.758214	0.680675	0.0139532	0.00379712	0.0585686	0.996517	0.846652
575	docosadienoate (22:2n6)	434	TRUE	-0.392066	-0.0444465	0.00865211	-0.0998352	0.244328	0.00843749	0.00196294	-7.02223	-3.33193	0.286306	0.71757	0.955777	0.303815	0.379585	0.353239	0.790389	0.0193045	0.213683	0.996517	0.919309
803	X - 11372	434	TRUE	0.425053	-0.469759	-0.00757487	0.574437	-0.242424	-0.00477659	-0.00912642	-5.32822	-1.08664	0.191001	1.52908e-05	0.956203	2.18931e-11	0.324042	0.552189	0.162126	0.0446337	0.646419	0.996517	0.00685028
667	erythronate*	434	TRUE	-1.45604	0.240209	0.00788006	0.487321	0.320555	0.0125485	0.0177167	5.59811	0.637151	1.71326e-05	0.0338022	0.956269	5.04733e-08	0.210709	0.133875	0.00919463	0.0428649	0.796271	0.996517	0.300873
147	bilirubin (E,Z or Z,E)*	434	TRUE	-0.00953652	0.0638776	0.00867172	0.475596	-0.0492576	0.0185489	-0.0294718	-6.51122	2.2378	0.979705	0.610133	0.956524	1.54948e-06	0.862063	0.0453135	9.06223e-05	0.0333538	0.41269	0.996517	0.853444
361	sphingomyelin (d18:1/20:1, d18:2/20:0)*	434	TRUE	-0.680344	0.0882404	-0.00722991	-0.187606	-0.844584	0.00123078	0.0206528	-6.89827	4.31561	0.046979	0.44072	0.960321	0.0380249	0.0011104	0.884406	0.00267728	0.0136054	0.0837729	0.996517	0.767223
767	3-phenylpropionate (hydrocinnamate)	434	TRUE	0.776162	0.096572	-0.00715954	-0.107798	0.0544079	0.00962719	-0.0422252	11.6663	3.55734	0.04118	0.447153	0.964597	0.28285	0.849893	0.305585	3.19242e-08	0.000170199	0.199091	0.996517	0.771421
358	androsterone glucuronide	434	TRUE	0.953915	-0.116849	-0.00512481	0.851705	-0.164286	-0.0286179	0.00472022	11.9477	-0.368074	0.00062667	0.210014	0.965463	6.27485e-31	0.436088	3.31607e-05	0.399468	1.54319e-07	0.856304	0.996517	0.61628
548	16-hydroxypalmitate	434	TRUE	0.029199	-0.0911651	0.00668463	-0.25386	-0.0132265	0.00777658	-0.00969478	-2.78001	0.574048	0.937536	0.464068	0.966274	0.00986921	0.96256	0.398461	0.19513	0.360688	0.832555	0.996517	0.775513
572	1-docosahexaenoyl-GPC (22:6)*	434	TRUE	0.270275	0.0816665	0.00622942	0.335106	-0.248757	0.0252049	-0.0542109	-1.89902	3.14682	0.438543	0.48366	0.966436	0.00027523	0.345782	0.00347126	1.02221e-14	0.504901	0.215822	0.996517	0.782237
588	pregnenediol sulfate (C21H34O5S)*	434	TRUE	1.69815	0.0290695	-0.00477032	0.759474	-0.844362	-0.0305454	-0.0161254	-1.64305	1.10497	2.74073e-09	0.760669	0.968598	7.34232e-24	9.2382e-05	1.51008e-05	0.00493044	0.480908	0.595434	0.996517	0.931092
328	beta-cryptoxanthin	434	TRUE	1.59896	0.0227774	-0.00517701	-0.0271768	-0.310163	-0.000358232	-0.0544259	-12.0851	4.12821	2.64803e-07	0.826341	0.968673	0.740411	0.186765	0.962792	2.70817e-18	1.8827e-06	0.0682209	0.996517	0.953114
402	3-indoxyl sulfate	434	TRUE	0.0468575	0.132156	-0.00571208	0.266342	-0.177985	-0.00243136	-0.00311708	9.2115	-3.35961	0.894197	0.261677	0.969521	0.00419634	0.504125	0.780105	0.659565	0.00136029	0.190685	0.996517	0.663925
35	X - 12216	434	TRUE	0.174803	0.137101	-0.00565275	0.0485023	-0.159185	0.0116729	-0.0309706	11.8369	2.58079	0.617879	0.241674	0.969673	0.600123	0.548026	0.17776	1.0785e-05	3.49769e-05	0.312155	0.996517	0.65223
549	gamma-glutamylmethionine	434	TRUE	0.640755	0.0787017	0.00521308	0.685935	-0.548843	-0.0190183	-0.00980095	-7.28634	3.15671	0.0477885	0.466945	0.969728	1.01959e-15	0.0249734	0.0174717	0.131707	0.00582863	0.180864	0.996517	0.775513
354	5-hydroxylysine	434	TRUE	-1.09514	0.122422	-0.00499809	-0.44168	-0.00935884	-0.0137805	0.0579137	14.5855	-3.91597	0.000660605	0.254645	0.970781	1.97603e-07	0.969303	0.0829897	3.05297e-19	2.75589e-08	0.0947133	0.996517	0.663009
884	X - 11381	434	TRUE	-1.52874	0.0599457	-0.00514383	0.847982	0.00871916	0.0038502	0.0298825	-6.0357	-1.00815	5.51711e-06	0.593897	0.971255	1.34666e-21	0.972661	0.643366	9.74911e-06	0.0279581	0.680905	0.996517	0.846652
794	methionine sulfoxide	434	TRUE	-0.305173	0.130746	0.00559558	-0.0451582	-0.150633	0.00322547	0.0046322	3.09366	5.6631	0.420001	0.301202	0.972201	0.651315	0.598642	0.730231	0.54221	0.316587	0.0400145	0.996517	0.695477
83	sphingomyelin (d18:2/16:0, d18:1/16:1)*	434	TRUE	-1.69138	0.146214	-0.00385218	-0.238115	-0.648747	0.0186021	0.0338142	-6.11256	0.0361829	3.61341e-07	0.188094	0.978211	0.00666867	0.00985805	0.0235746	4.083e-07	0.0242742	0.988082	0.996517	0.581146
670	methyl-4-hydroxybenzoate sulfate	434	TRUE	-0.18774	-0.0381583	-0.00411091	-0.48483	0.00112408	0.0130051	-0.00642204	-1.50845	6.24688	0.60166	0.750871	0.978509	3.29857e-07	0.996702	0.143489	0.373948	0.607371	0.0171438	0.996517	0.929496
28	maleate	434	TRUE	-1.07717	0.0470108	0.00301896	-0.116164	0.498971	0.0161847	0.0143221	7.91278	-0.932747	0.000508123	0.649821	0.98168	0.155643	0.0332157	0.0345845	0.0213633	0.00175671	0.679528	0.996517	0.882181
448	1-palmitoleoyl-GPC (16:1)*	434	TRUE	-0.193243	0.152733	-0.00348787	0.116273	0.324703	0.0195395	-0.0226868	11.3917	-2.86022	0.598136	0.212546	0.982113	0.229709	0.241546	0.0310749	0.00206251	0.000140939	0.284355	0.996517	0.618158
824	phenylacetylglutamine	434	TRUE	0.0550503	0.273404	0.00318945	0.0125334	-0.154101	0.00457402	-0.0210326	9.04467	-3.69146	0.881139	0.0262724	0.983711	0.897414	0.579935	0.615236	0.00444856	0.00261592	0.168841	0.996517	0.300873
793	lignoceroyl sphingomyelin (d18:1/24:0)	434	TRUE	-0.482488	0.267403	0.00303745	0.335886	-0.708419	0.0205648	-0.0172154	2.21586	0.477678	0.192613	0.0307151	0.984578	0.000592335	0.0114188	0.0246649	0.02063	0.463536	0.859499	0.996517	0.300873
226	1-myristoyl-2-arachidonoyl-GPC (14:0/20:4)*	434	TRUE	-1.62253	0.0980714	-0.00286244	-0.3766	0.127177	0.0350197	0.0184571	8.41222	2.34185	4.18697e-06	0.405217	0.984735	5.22608e-05	0.63338	5.86344e-05	0.00914691	0.00346783	0.362041	0.996517	0.754456
748	X - 12822	434	TRUE	0.131236	-0.166522	0.00284462	0.590166	0.115081	-0.0144171	0.00388327	-3.21073	-5.56816	0.715231	0.165966	0.98513	5.1757e-10	0.672255	0.104918	0.590904	0.274179	0.0336485	0.996517	0.563924
550	4-allylcatechol sulfate	434	TRUE	0.474259	-0.0401522	-0.00259045	0.0943602	0.0402888	-0.00755789	-0.00921373	2.25559	-0.777723	0.179017	0.733525	0.986199	0.31126	0.880013	0.386293	0.193641	0.433653	0.762345	0.996517	0.926993
151	dimethylglycine	434	TRUE	0.270469	0.0270584	-0.00255693	0.458234	0.0506401	-0.00965575	-0.00756628	-5.39392	2.34781	0.446053	0.819553	0.986455	1.0113e-06	0.850358	0.27109	0.288507	0.0626447	0.364025	0.996517	0.953114
566	arachidate (20:0)	434	TRUE	-0.0510616	-0.0151383	-0.00255165	0.17286	0.0251908	0.0208625	-0.0297612	0.227456	1.03361	0.885575	0.898413	0.986478	0.0650342	0.925205	0.017376	2.96361e-05	0.937406	0.689342	0.996517	0.974473
762	cysteine	434	TRUE	0.101367	-0.00385391	0.00255167	0.304814	0.0177177	0.00845957	-0.0200737	7.13475	-2.77654	0.782277	0.974918	0.98692	0.00164821	0.949071	0.3508	0.00643229	0.0171759	0.298911	0.996517	0.994905
128	X - 23641	434	TRUE	-1.03371	0.0962387	-0.00235552	0.424577	-0.221224	0.0091423	0.0195803	4.8902	2.59385	0.00316126	0.410909	0.987353	4.40308e-06	0.403556	0.290929	0.00537308	0.087154	0.309453	0.996517	0.754456
571	X - 11852	434	TRUE	-0.152185	-0.0675674	0.00230912	0.0127703	0.164608	-0.00926949	0.0141761	3.69788	2.06344	0.68409	0.588799	0.988391	0.897112	0.560589	0.316038	0.0591346	0.225816	0.449002	0.996517	0.843212
861	beta-hydroxyisovalerate	434	TRUE	-0.799809	0.171027	-0.00205947	0.949765	0.0247451	0.00282878	0.0149035	-5.17194	4.53051	0.0189468	0.133222	0.988638	4.90139e-26	0.923519	0.737052	0.0294691	0.0630366	0.0681413	0.996517	0.5054
701	glutamate	434	TRUE	-2.08696	0.0525254	-0.00179172	0.726874	0.610723	0.00113904	0.0564361	-3.80363	-2.56056	2.9424e-12	0.599082	0.988731	3.32947e-20	0.00690886	0.877506	5.5096e-21	0.119095	0.239871	0.996517	0.846652
509	X - 23680	434	TRUE	-0.334206	-0.229829	0.00178655	0.564267	0.219715	-0.0188004	0.0289982	-2.33385	-1.11565	0.321015	0.0411387	0.990025	2.2158e-10	0.388297	0.0239176	1.80841e-05	0.395894	0.649392	0.996699	0.305869
862	phenylacetylcarnitine	434	TRUE	0.215169	0.115062	0.00134998	0.130012	-0.131512	-0.0104961	-0.00442696	-2.8732	-3.5038	0.546187	0.334201	0.99288	0.167275	0.625727	0.233668	0.536427	0.323533	0.177475	0.997354	0.704573
351	X - 11378	434	TRUE	0.378923	-0.450619	0.00126967	0.688612	-0.0439305	-0.0273027	0.0193478	-7.64773	-3.80452	0.259878	6.08806e-05	0.992901	8.87344e-15	0.862866	0.00102252	0.00417782	0.00534018	0.120573	0.997354	0.0136373
114	X - 19438	434	TRUE	-0.440398	-0.24179	-0.00100402	0.398335	0.0952481	-0.000382531	0.0173628	-1.59843	-1.45679	0.203588	0.0367282	0.99455	1.32937e-05	0.71615	0.964365	0.0125676	0.57186	0.563848	0.997891	0.300873
850	dodecenedioate (C12:1-DC)*	434	TRUE	0.136188	0.0198627	-0.000851663	-0.123968	-0.00814419	0.00542571	-0.0170366	-3.14762	-2.9397	0.716272	0.873969	0.995726	0.210223	0.977072	0.55802	0.023587	0.303448	0.281665	0.997954	0.972766
295	phosphatidylcholine (16:0/22:5n3, 18:1/20:4)*	434	TRUE	0.208974	0.120839	-0.00046088	0.303677	-0.18319	0.00976459	-0.0315951	-2.25377	5.87497	0.595391	0.358158	0.997798	0.00347094	0.538175	0.315449	6.39647e-05	0.482911	0.0404878	0.998913	0.719713
733	decadienedioic acid (C10:2-DC)**	434	TRUE	-0.213987	0.00127241	-9.1341e-05	-0.0773663	0.116484	-0.00388598	0.010454	8.32159	0.546444	0.550389	0.991522	0.999521	0.413528	0.667299	0.660856	0.14633	0.00444089	0.834237	0.999521	0.997683

## Sheet: Delta_Age_Middle_CA
	col1	n	converged	Intercept	C(Delta_Age_Status_Indiv)[T.Bio_Old]	C(Delta_Age_Status_Indiv)[T.Bio_Young]	C(sex)[T.M]	meds_cholesterol[T.Yes]	age	BMI_CALC	PC1	PC2	Intercept_p	C(Delta_Age_Status_Indiv)[T.Bio_Old]_p	C(Delta_Age_Status_Indiv)[T.Bio_Young]_p	C(sex)[T.M]_p	meds_cholesterol[T.Yes]_p	age_p	BMI_CALC_p	PC1_p	PC2_p	Bio_Young_pval_adj	Bio_Old_pval_adj
610	N2,N5-diacetylornithine	433	TRUE	0.404601	0.512002	-0.233722	0.167066	-0.0532933	0.0155782	-0.0431825	9.94255	7.30388	0.597344	1.59679e-05	0.0429343	0.0562282	0.691973	0.307921	8.67436e-11	0.00339014	0.0275996	0.531112	0.00800604
490	urea	433	TRUE	-1.19135	0.53785	-0.304331	0.559705	0.306622	0.0233883	-0.00743856	9.13661	-5.49748	0.141007	1.78706e-05	0.0126046	1.41447e-09	0.0309807	0.147398	0.290135	0.0108265	0.116579	0.423324	0.00800604
491	1-arachidonoyl-GPE (20:4n6)*	433	TRUE	-0.834033	0.515122	0.104639	0.270654	0.0385878	0.0119361	0.000961234	8.32511	-2.68779	0.318712	7.02716e-05	0.406569	0.00461942	0.792793	0.47437	0.894779	0.024667	0.457873	0.801319	0.0200978
118	tiglylcarnitine (C5:1-DC)	433	TRUE	-0.333706	0.522767	-0.116815	0.564687	0.0115176	0.00738842	-0.0113815	-0.386156	2.2097	0.700068	9.797e-05	0.370981	1.15507e-08	0.939651	0.668951	0.130496	0.919851	0.555652	0.789545	0.0200978
541	arabitol/xylitol	433	TRUE	-1.8561	0.466075	-0.160718	0.463031	0.23421	0.0368456	-0.00608982	-1.12808	0.596058	0.0171714	0.000112153	0.171018	1.95248e-07	0.0868568	0.0177142	0.3682	0.743731	0.859669	0.704927	0.0200978
568	isovalerylglycine	433	TRUE	0.12094	0.506463	-0.135958	0.00712522	-0.0265603	0.015311	-0.0318414	13.6403	8.36047	0.887688	0.000134651	0.292196	0.941937	0.859814	0.370065	1.87339e-05	0.000323842	0.0241013	0.746611	0.0201079
577	1-oleoyl-GPE (18:1)	433	TRUE	-0.88843	0.462508	0.0648888	0.301534	-0.0274198	0.0306055	-0.027613	6.22693	-4.19083	0.268584	0.000200949	0.591905	0.00101305	0.845843	0.05605	7.57556e-05	0.0800698	0.227955	0.873449	0.0257215
881	N-acetylvaline	433	TRUE	-0.91277	0.506067	-0.0783513	0.0947801	0.0895048	0.00397725	0.0229952	4.53302	2.99292	0.306096	0.000249419	0.560003	0.352233	0.567695	0.823095	0.00300292	0.251272	0.438176	0.86214	0.0259091
411	isobutyrylglycine	433	TRUE	-0.216239	0.470944	-0.19432	-0.0328307	-0.271016	0.0192801	-0.0249304	10.4404	6.75139	0.795598	0.000270668	0.122491	0.730635	0.0644998	0.246901	0.000587561	0.00475531	0.0616899	0.677913	0.0259091
756	1-methylhistidine	433	TRUE	-0.751153	0.451312	-0.138231	0.509058	0.336346	0.0169085	-0.0119787	12.9116	5.34725	0.349991	0.000289164	0.253851	2.94964e-08	0.0171744	0.291567	0.0862809	0.000287607	0.12428	0.731074	0.0259091
85	1-carboxyethylphenylalanine	433	TRUE	-2.04018	0.403203	-0.114103	0.480918	0.176617	0.00604417	0.0520327	-2.42029	-0.036971	0.00509172	0.000352134	0.298637	7.46922e-09	0.16734	0.677386	1.998e-16	0.453202	0.990643	0.746611	0.0280012
367	phenyllactate (PLA)	433	TRUE	-0.316813	0.398267	-0.0180441	0.883533	0.0196358	-0.00271235	0.00195422	8.08245	1.50307	0.661139	0.000375016	0.868448	1.00823e-26	0.877059	0.850769	0.755658	0.0115958	0.63091	0.963954	0.0280012
21	isobutyrylcarnitine (C4)	433	TRUE	-0.226924	0.46094	-0.109317	0.388136	0.0181908	0.018401	-0.0302683	-2.17492	1.18739	0.788044	0.000423164	0.390207	5.68941e-05	0.90233	0.274425	3.67135e-05	0.560815	0.745181	0.795359	0.0291657
687	glucose	433	TRUE	-1.91326	0.400172	-0.159587	0.242696	0.358431	0.0116141	0.041621	-5.07029	0.158185	0.00946885	0.000459774	0.151056	0.0039633	0.00564323	0.429756	8.23844e-11	0.120646	0.960473	0.694084	0.0294256
409	2-oleoyl-GPE (18:1)*	433	TRUE	-1.02313	0.421763	0.216087	0.244102	-0.0542723	0.0240169	-0.0123726	10.179	-1.99913	0.201768	0.000681651	0.073671	0.00767607	0.699813	0.133036	0.0756259	0.0041482	0.564457	0.614329	0.0389918
553	argininate*	433	TRUE	-0.673493	0.447303	-0.10854	0.415536	0.19873	0.00533476	0.00793283	8.81649	2.04765	0.430862	0.000732478	0.399669	2.09664e-05	0.185665	0.75443	0.285593	0.0199343	0.580068	0.801126	0.0389918
774	ethyl alpha-glucopyranoside	433	TRUE	-0.143766	0.434851	-0.138035	0.219269	0.240516	0.013012	-0.0232742	13.8622	0.348987	0.862992	0.000753403	0.27167	0.0212279	0.100199	0.433625	0.00130331	0.000172766	0.922905	0.739821	0.0389918
660	kynurenate	433	TRUE	-0.709715	0.42902	-0.0760295	0.534698	-0.0519432	-0.0110947	0.0343094	7.84805	-2.5285	0.389395	0.000783317	0.540722	1.37583e-08	0.719819	0.499966	1.67759e-06	0.031684	0.478679	0.85147	0.0389918
552	1-stearoyl-2-oleoyl-GPI (18:0/18:1)*	433	TRUE	-1.25036	0.446207	0.0435099	-0.149101	-0.596391	0.0411433	-0.0221337	4.46839	-2.382	0.149227	0.000892425	0.739164	0.1322	8.96101e-05	0.0173512	0.0032996	0.244663	0.525587	0.932804	0.0420849
454	4-acetamidobutanoate	433	TRUE	-0.690946	0.429305	-0.0289538	0.106522	0.230976	0.0173557	-0.00964061	0.633656	0.0215545	0.412662	0.00101725	0.819841	0.268916	0.118909	0.302252	0.188332	0.865338	0.995289	0.961265	0.045573
6	2-hydroxydecanoate	433	TRUE	-0.383615	0.40019	0.15677	0.243604	-0.0108041	0.0298178	-0.0440915	3.81296	2.50654	0.629282	0.00115081	0.1906	0.0072876	0.938292	0.0599583	1.7057e-10	0.278784	0.466187	0.708224	0.0491011
94	2,3-dihydroxy-5-methylthio-4-pentenoate (DMTPA)*	433	TRUE	-2.51392	0.359983	-0.193219	0.614653	0.122456	0.0228984	0.0403875	6.36891	0.0127939	0.000466572	0.00121836	0.0743741	6.92464e-14	0.331758	0.110066	9.79358e-11	0.045385	0.996717	0.614329	0.0496205
16	X - 16570	433	TRUE	-0.67168	0.435257	-0.200359	-0.171932	0.0716282	0.0161133	-0.00313566	5.97652	0.447465	0.443782	0.00135786	0.129634	0.0861681	0.641913	0.35704	0.68073	0.124022	0.906175	0.677913	0.0510529
340	1-palmitoyl-2-oleoyl-GPC (16:0/18:1)	433	TRUE	-0.977866	0.437002	0.128763	-0.174428	-0.136378	0.0307264	-0.0154105	10.9758	-3.83563	0.2671	0.00136749	0.332305	0.0831257	0.378153	0.0804345	0.0441306	0.00492865	0.314585	0.780974	0.0510529
448	1-palmitoleoyl-GPC (16:1)*	433	TRUE	-1.27247	0.41361	0.0720511	0.117181	-0.0711495	0.0268451	-0.00558977	11.8667	-4.28506	0.130121	0.00149365	0.569628	0.222406	0.629867	0.109408	0.444122	0.00144163	0.238972	0.86214	0.0535325
120	X - 23314	433	TRUE	0.513832	0.407932	0.020802	0.0660965	0.0499188	0.00769098	-0.0357105	6.10776	-0.205185	0.538206	0.00160806	0.868692	0.488251	0.733479	0.644168	8.5064e-07	0.0986344	0.954717	0.963954	0.0536476
599	sulfate of piperine metabolite C18H21NO3 (1)*	433	TRUE	-0.437856	0.423242	-0.00261557	0.30028	0.0677516	0.00981541	-0.00766717	-7.04478	-8.03403	0.616735	0.00179095	0.984175	0.00266028	0.659238	0.573808	0.31315	0.0691255	0.0338776	0.988473	0.0536476
578	1-palmitoyl-2-oleoyl-GPI (16:0/18:1)*	433	TRUE	-1.46647	0.408639	0.0895399	-0.245257	-0.376117	0.0240236	0.0150217	8.70639	-2.78653	0.0825782	0.00179311	0.481941	0.0110423	0.0112391	0.153967	0.0407051	0.0200019	0.446035	0.838218	0.0536476
141	1-palmitoyl-2-arachidonoyl-GPI (16:0/20:4)*	433	TRUE	-1.81471	0.407874	0.0680432	-0.134963	-0.0382784	0.0173193	0.0347299	7.86007	-4.63797	0.0315216	0.00180868	0.592697	0.161523	0.796187	0.303533	2.1739e-06	0.0355179	0.204191	0.873449	0.0536476
242	1-oleoyl-GPC (18:1)	433	TRUE	-0.014068	0.356128	-0.120492	0.311967	-0.306324	0.0327161	-0.0600205	7.35327	-1.51092	0.984771	0.0018131	0.278075	0.00021108	0.0179468	0.0260512	7.05292e-21	0.0243154	0.635767	0.742648	0.0536476
356	2-hydroxyglutarate	433	TRUE	-0.901665	0.390536	0.139062	0.00052072	0.222664	0.0238562	-0.0142347	4.1698	0.300139	0.265634	0.00185611	0.254706	0.99551	0.117515	0.139805	0.0431164	0.245236	0.931781	0.731074	0.0536476
300	X - 15492	433	TRUE	-1.92115	0.360525	0.041034	0.763672	0.235083	0.0147009	0.0295074	4.75094	-1.71585	0.0106321	0.00197099	0.71736	6.16949e-19	0.0750853	0.327093	6.30989e-06	0.153879	0.598125	0.923497	0.0551877
326	X - 18913	433	TRUE	-0.760145	0.389695	0.143477	0.516828	-0.248115	0.0137581	-0.00460916	-5.59958	-2.41469	0.35151	0.0020482	0.243351	2.9409e-08	0.083348	0.397913	0.515585	0.121348	0.494149	0.731074	0.0556118
261	N-acetyltryptophan	433	TRUE	-0.615717	0.383448	0.0060029	0.604375	0.0108447	-0.000782102	0.0141983	2.40835	-8.26754	0.447994	0.00228629	0.960858	7.05155e-11	0.939341	0.961463	0.0440374	0.502915	0.0185857	0.986869	0.0572105
857	X - 12007	433	TRUE	-1.54705	0.422805	-0.231891	0.225965	-0.0271915	0.0312943	-0.00309992	7.33648	4.68217	0.083926	0.00229515	0.0856642	0.0271188	0.86267	0.0796516	0.690202	0.0643045	0.226872	0.624025	0.0572105
877	kynurenine	433	TRUE	-1.80504	0.388089	-0.127781	0.537597	-0.055755	0.0113217	0.0344417	12.3463	-1.37313	0.0284735	0.00236233	0.303543	1.12068e-08	0.700009	0.490916	1.50289e-06	0.000718945	0.700235	0.753393	0.0572105
716	1-palmitoyl-2-palmitoleoyl-GPC (16:0/16:1)*	433	TRUE	-1.22755	0.394982	0.157442	-0.324506	0.112179	0.00944002	0.029274	12.4312	-2.70665	0.143243	0.00236249	0.212925	0.000705775	0.446234	0.572523	5.87855e-05	0.000819641	0.455876	0.720701	0.0572105
869	X - 24337	433	TRUE	-0.530865	0.361859	-0.148435	0.596028	0.275698	-0.0200402	0.0451277	7.22284	7.8183	0.492984	0.00255641	0.203463	1.60746e-11	0.0426263	0.194478	1.98177e-11	0.0352506	0.0196699	0.717735	0.0585798
460	X - 21736	433	TRUE	-1.58456	0.375335	-0.142211	0.00581767	0.0877589	0.022485	0.0160476	2.37246	-1.26819	0.048941	0.00260524	0.241022	0.94954	0.534611	0.161277	0.0217246	0.505747	0.715794	0.731074	0.0585798
730	1-(1-enyl-palmitoyl)-2-oleoyl-GPE (P-16:0/18:1)*	433	TRUE	-0.339418	0.408633	-0.230417	0.0747472	-0.349608	0.0170115	-0.0202029	-6.45557	-0.17057	0.698666	0.00262516	0.081245	0.455506	0.0231768	0.330707	0.00800242	0.0965208	0.964152	0.614329	0.0585798
821	etiocholanolone glucuronide	433	TRUE	1.18181	0.378766	-0.0488873	0.61093	-0.15837	-0.0144485	-0.0262384	9.58848	4.06483	0.146745	0.00268055	0.69045	5.15029e-11	0.268173	0.373783	0.00020893	0.00787126	0.24888	0.916747	0.0585798
354	5-hydroxylysine	433	TRUE	-3.09882	0.357959	-0.057599	-0.400032	0.0839892	0.0301857	0.0604435	12.9911	-5.30241	6.12245e-05	0.002802	0.62113	5.92192e-06	0.536201	0.0503125	2.30744e-19	0.000148989	0.113101	0.885891	0.0585967
535	1-oleoyl-GPI (18:1)	433	TRUE	-3.01793	0.408566	0.224532	0.0242314	-0.346217	0.065608	-0.0103282	3.71181	4.09392	0.00062931	0.00281212	0.0915245	0.810115	0.0255374	0.000194674	0.178138	0.342578	0.283999	0.627245	0.0585967
832	1-palmitoyl-2-arachidonoyl-GPE (16:0/20:4)*	433	TRUE	-0.0396199	0.407308	0.0542554	-0.188602	0.311766	0.000225713	0.00202757	3.70005	-0.941831	0.964282	0.00296116	0.684129	0.0620409	0.0448041	0.989796	0.791971	0.345183	0.805737	0.913531	0.0602999
609	picolinate	433	TRUE	-0.131457	0.352302	0.069031	0.590571	-0.171376	0.0032636	-0.00933203	-9.37905	-0.73347	0.864854	0.00323594	0.55322	2.18429e-11	0.206436	0.83224	0.164361	0.00612594	0.826349	0.86214	0.0615053
708	acisoga	433	TRUE	-0.00520478	0.386177	-0.223062	-0.0199398	0.108139	-0.00313832	0.00598095	0.0223463	-2.33511	0.995099	0.00326287	0.0807416	0.836805	0.467432	0.852704	0.416602	0.995251	0.524366	0.614329	0.0615053
785	N-acetylleucine	433	TRUE	0.171854	0.376449	-0.0306049	0.483251	0.0905967	-0.024492	0.0299161	4.99081	3.11628	0.83629	0.00347859	0.80712	3.64791e-07	0.535065	0.13984	3.47281e-05	0.175555	0.386673	0.957854	0.0615053
41	1-linolenoyl-GPC (18:3)*	433	TRUE	-0.414936	0.375356	-0.0166845	0.288075	-0.171974	0.0185666	-0.0241621	6.896	3.14689	0.617114	0.00350715	0.893902	0.00237903	0.238054	0.262082	0.000806518	0.0607279	0.381058	0.970832	0.0615053
600	1-palmitoyl-GPE (16:0)	433	TRUE	0.594329	0.380095	0.00487775	-0.0143167	0.108172	0.0159251	-0.0497289	6.87125	-2.02459	0.479576	0.00351545	0.969293	0.881492	0.463741	0.342267	9.88316e-12	0.0650408	0.577947	0.986869	0.0615053
130	xanthurenate	433	TRUE	0.776304	0.39068	-0.045811	0.375326	0.0545311	-0.026077	0.00946013	2.84855	0.470693	0.369352	0.00354284	0.725254	0.000145182	0.719551	0.130606	0.208025	0.45717	0.899934	0.92546	0.0615053
79	retinol (Vitamin A)	433	TRUE	-1.27651	0.376358	-0.0480332	0.64508	0.202986	0.0335064	-0.0218314	5.96964	-0.144596	0.125545	0.00355093	0.702147	1.23097e-11	0.165419	0.0438172	0.00256737	0.105864	0.968023	0.922469	0.0615053
12	1-myristoyl-GPC (14:0)	433	TRUE	-0.514342	0.385251	0.0657229	0.159312	-0.0422222	0.00896007	-0.000917849	9.33575	-3.36829	0.546733	0.0035695	0.609422	0.102255	0.778172	0.598664	0.901493	0.0135443	0.361887	0.878823	0.0615053
101	indolelactate	433	TRUE	0.0646408	0.368685	0.0338977	0.730509	0.158314	-0.00205685	-0.010511	8.9291	6.82145	0.93721	0.00372704	0.784032	6.54407e-15	0.271944	0.899997	0.14041	0.0140396	0.0547883	0.943664	0.0619508
428	alpha-ketoglutarate	433	TRUE	-0.313479	0.380429	0.112412	0.39168	0.377014	-0.0114765	0.0206598	5.71869	-3.33058	0.711257	0.00373364	0.378513	5.15155e-05	0.011245	0.496889	0.00498906	0.127442	0.363567	0.795359	0.0619508
226	1-myristoyl-2-arachidonoyl-GPC (14:0/20:4)*	433	TRUE	-1.03267	0.37759	0.194784	-0.185008	0.0852886	0.00787546	0.0226675	8.69781	-2.3502	0.220224	0.00380885	0.125003	0.0545328	0.564255	0.639279	0.00195443	0.0197685	0.519208	0.677913	0.0620496
788	1-(1-enyl-stearoyl)-2-oleoyl-GPE (P-18:0/18:1)	433	TRUE	-0.608964	0.383528	-0.202241	0.0388882	-0.191154	0.0250626	-0.0231939	-2.19731	1.68489	0.480609	0.00413747	0.120176	0.693377	0.207421	0.145595	0.00198951	0.565656	0.652102	0.677913	0.0630573
757	1-stearoyl-2-oleoyl-GPC (18:0/18:1)	433	TRUE	-1.99406	0.366879	0.00111335	-0.143305	-0.150737	0.0521152	-0.0156121	7.17025	-0.81953	0.0160777	0.00425154	0.992886	0.129952	0.300145	0.00161105	0.0300804	0.0507299	0.819217	0.994229	0.0630573
216	4-hydroxyphenylacetylglutamine	433	TRUE	-2.15054	0.358692	-0.0565915	0.313018	0.208171	0.0305271	0.0182951	4.07282	4.0635	0.00794479	0.00426431	0.643069	0.000719537	0.143445	0.0588957	0.00935135	0.256494	0.246571	0.903762	0.0630573
364	2-arachidonoyl-GPE (20:4)*	433	TRUE	-1.23092	0.380231	0.281432	0.225942	0.10249	0.0137932	0.00997868	8.02139	-0.378184	0.151968	0.00428169	0.0297771	0.021342	0.497002	0.420939	0.181343	0.0350941	0.919006	0.468075	0.0630573
182	glycine conjugate of C10H12O2*	433	TRUE	-1.30452	0.400402	-0.139897	0.242146	0.0870658	0.0118178	0.0200579	-2.21877	1.10174	0.149581	0.00430227	0.305253	0.0192096	0.583941	0.512823	0.0107715	0.580108	0.778588	0.755544	0.0630573
430	X - 17676	433	TRUE	-0.928412	0.37408	-0.37254	0.000919477	0.038004	0.0162728	0.0068371	17.9146	2.39184	0.272758	0.00433703	0.00350435	0.992414	0.798234	0.335195	0.352604	1.7807e-06	0.513916	0.406376	0.0630573
283	1-palmitoyl-2-(hydroxylinoleoyl)-GPC (16:0/18:2(OH))*	433	TRUE	0.17508	0.339858	-0.0499029	0.0920236	-0.212015	0.0123967	-0.0283455	-0.489512	-4.46986	0.82034	0.00443017	0.667591	0.29606	0.117348	0.420148	2.31867e-05	0.886031	0.180402	0.912651	0.0630573
663	lactosyl-N-palmitoyl-sphingosine (d18:1/16:0)	433	TRUE	2.58842	-0.369287	0.1437	-0.203255	-0.416693	-0.0377182	-0.0189848	8.79392	-2.03249	0.00200307	0.00443371	0.255118	0.0336846	0.00462181	0.023998	0.00910249	0.0178148	0.575137	0.731074	0.0630573
1	4-guanidinobutanoate	433	TRUE	-0.67687	0.345263	0.0434931	0.739016	0.101291	0.0161705	-0.0140682	6.20095	3.49575	0.389316	0.004589	0.713633	1.91171e-16	0.463227	0.302529	0.0394723	0.0750506	0.304361	0.922678	0.0642459
860	1-carboxyethylvaline	433	TRUE	-1.69944	0.338565	-0.222809	0.456741	0.184121	0.00369555	0.0454373	0.31417	0.410607	0.0283637	0.00481417	0.0565459	2.50344e-07	0.176244	0.811115	1.5223e-11	0.927113	0.902609	0.560121	0.0663615
449	1-carboxyethylleucine	433	TRUE	-1.95977	0.323552	-0.102786	0.677866	0.258616	0.0113708	0.0385663	2.00658	-0.801274	0.00833863	0.00493209	0.35866	1.37789e-15	0.0474511	0.442881	2.30352e-09	0.54207	0.803221	0.789545	0.0669569
807	1-linoleoyl-2-docosahexaenoyl-GPC (18:2/22:6)*	433	TRUE	-0.524461	0.343678	0.152902	-0.0221638	-0.0710704	0.0442358	-0.0593719	3.40676	0.35863	0.508072	0.00511611	0.200502	0.806584	0.609568	0.00513312	6.51673e-18	0.331842	0.916729	0.71718	0.0684184
736	1-palmitoyl-GPC (16:0)	433	TRUE	-0.645985	0.360612	0.0440553	0.343964	-0.263356	0.0301086	-0.0345844	7.46635	-4.50494	0.438798	0.00527204	0.726114	0.000307807	0.0722916	0.0704404	1.83753e-06	0.0433958	0.212267	0.92546	0.0694669
814	X - 21829	433	TRUE	-1.23274	0.367814	-0.0669818	0.213828	-0.010281	0.0161698	0.0128779	1.61996	-5.71034	0.149565	0.0055109	0.603429	0.0286634	0.94544	0.34332	0.0831661	0.66905	0.123033	0.877646	0.0713949
167	3-hydroxy-3-methylglutarate	433	TRUE	0.386526	0.338171	0.0445103	-0.090323	0.87744	-0.00665546	-0.00769115	9.36251	1.07922	0.623596	0.00557773	0.707715	0.315444	2.24472e-10	0.671835	0.261062	0.00729188	0.751576	0.922678	0.0713949
582	1-palmitoyl-2-arachidonoyl-GPC (16:0/20:4n6)	433	TRUE	-1.01126	0.379779	0.133091	-0.113782	0.153646	0.0133451	0.0116826	10.775	0.576088	0.255331	0.00582349	0.320619	0.262571	0.325071	0.451727	0.130433	0.00622383	0.880998	0.776962	0.0734908
350	2-oxoarginine*	433	TRUE	-0.483524	0.380277	0.00515383	0.415223	0.0449047	-0.0105723	0.02887	5.02269	1.7824	0.587643	0.00590671	0.969412	4.57816e-05	0.774303	0.552247	0.000194343	0.203574	0.644229	0.986869	0.0735057
330	vanillactate	433	TRUE	-1.53678	0.340888	0.0197922	0.272061	0.0773407	0.0234927	0.00846971	5.72615	10.3172	0.0583049	0.00670565	0.871481	0.00334468	0.587418	0.146767	0.229756	0.111285	0.00331822	0.963954	0.0792837
523	4-cholesten-3-one	433	TRUE	-2.40909	0.34138	-0.187441	0.0607345	-0.00318552	0.0282685	0.0358638	5.09054	-3.63346	0.00305008	0.00672795	0.126196	0.513238	0.982203	0.0813681	3.85434e-07	0.157637	0.301934	0.677913	0.0792837
143	2,3-dihydroxy-2-methylbutyrate	433	TRUE	-1.18377	0.342464	-0.16337	0.440932	0.325784	0.0308912	-0.0189338	1.46826	1.13597	0.147274	0.00680187	0.184543	2.29816e-06	0.0231442	0.0579696	0.00763601	0.684937	0.747994	0.708224	0.0792837
534	glycine conjugate of C10H14O2 (1)*	433	TRUE	-1.54346	0.37288	-0.0842507	0.376756	0.137152	0.0145482	0.0223138	1.29601	1.1837	0.0828833	0.0068416	0.529992	0.000210952	0.380231	0.412519	0.0039082	0.742392	0.758648	0.846475	0.0792837
198	N-acetyltyrosine	433	TRUE	-0.483309	0.341605	-0.162302	0.0713442	-0.132924	-0.0124745	0.0388852	5.26787	-0.251696	0.55336	0.00684353	0.186653	0.443729	0.353279	0.443102	4.05218e-08	0.144763	0.943149	0.708224	0.0792837
211	ribitol	433	TRUE	-1.55626	0.329397	0.0660935	0.0251799	0.296038	-0.000556439	0.0507521	-4.17201	-0.329291	0.0480114	0.00690193	0.577454	0.779445	0.0322177	0.971727	1.15996e-13	0.231513	0.923001	0.865721	0.0792837
890	guanidinoacetate	433	TRUE	1.37253	-0.325347	-0.00525522	0.534265	-0.00407736	-0.0186237	-0.0194485	-4.18848	3.1259	0.0785685	0.00711084	0.96436	2.05022e-09	0.976262	0.231469	0.00412178	0.225637	0.354691	0.986869	0.0804957
608	sulfate of piperine metabolite C16H19NO3 (3)*	433	TRUE	-0.026522	0.358735	-0.0196197	0.22949	0.0659609	-0.00195394	0.000302702	-2.02671	-4.85044	0.975457	0.00722725	0.879985	0.0197922	0.663068	0.909533	0.967765	0.595652	0.193653	0.966885	0.0804957
542	O-sulfo-L-tyrosine	433	TRUE	-1.13407	0.351127	-0.181932	0.0597378	0.250979	0.0257149	-0.00490766	11.1151	-2.88813	0.179315	0.00727696	0.152941	0.535786	0.0906023	0.126885	0.503611	0.00296989	0.429485	0.69561	0.0804957
393	1-palmitoyl-2-linoleoyl-GPI (16:0/18:2)	433	TRUE	-1.12404	0.364836	-0.0264408	-0.245256	-0.2111	0.00717977	0.0312338	-1.8117	-4.24314	0.204367	0.00783208	0.84299	0.0153451	0.174696	0.684431	4.92907e-05	0.64426	0.268353	0.961265	0.0855798
607	indoleacetate	433	TRUE	-0.0427096	0.369513	-0.0190242	0.326718	0.260046	0.0093754	-0.0226139	0.188558	5.44359	0.962104	0.00796511	0.888338	0.00146453	0.0995004	0.601061	0.00378701	0.962236	0.1618	0.96831	0.0859848
723	1-linoleoyl-GPE (18:2)*	433	TRUE	-0.96363	0.336477	-0.028544	0.338161	-0.382226	0.0280723	-0.0183768	0.0603359	-7.08783	0.240893	0.00820804	0.817729	0.000315128	0.00807831	0.086757	0.010053	0.986776	0.0462811	0.961265	0.0875525
317	N-delta-acetylornithine	433	TRUE	0.374538	0.337941	0.0204136	0.158787	-0.0778429	0.0203302	-0.052382	-0.2817	-1.51686	0.651555	0.00853022	0.870285	0.0937468	0.593029	0.219103	3.61727e-13	0.938887	0.672633	0.963954	0.0899185
382	X - 15503	433	TRUE	-2.77134	0.330487	-0.0795051	0.289489	0.198195	0.0323234	0.0374264	8.07116	1.32084	0.000667574	0.00881202	0.517243	0.00186293	0.16587	0.0466415	1.23299e-07	0.0253001	0.707921	0.846475	0.0914277
337	N6,N6,N6-trimethyllysine	433	TRUE	-0.289199	0.334622	0.0460526	0.567771	0.155227	0.000569651	-0.000128386	6.50775	7.01503	0.726101	0.00888273	0.711311	1.74001e-09	0.284314	0.972404	0.98572	0.0751782	0.0496302	0.922678	0.0914277
444	glucuronide of piperine metabolite C17H21NO3 (5)*	433	TRUE	-1.47785	0.355	-0.140337	0.189704	0.186264	0.0130652	0.0276112	-8.64756	-7.54109	0.091984	0.0089795	0.288436	0.0583069	0.226551	0.455177	0.000290893	0.0260429	0.046989	0.746611	0.0914277
258	X - 24728	433	TRUE	-1.66068	0.32116	-0.13097	0.261846	0.150488	0.0292765	0.00580295	7.59299	4.41363	0.0368065	0.00914795	0.274645	0.00395478	0.281329	0.0649963	0.401089	0.0311767	0.199854	0.739821	0.0920962
252	X - 13835	433	TRUE	0.605662	0.327569	-0.0950979	0.503943	0.357926	-0.013419	-0.00714414	13.5723	6.75021	0.45601	0.00925492	0.43745	5.65658e-08	0.0121276	0.407684	0.311551	0.000162895	0.0549411	0.813185	0.0921379
164	N-acetylputrescine	433	TRUE	0.145867	0.343683	0.0141745	-0.287809	0.335789	0.000712208	-0.00466653	-5.85876	4.13055	0.865122	0.00978281	0.912803	0.00334929	0.0259809	0.966836	0.531704	0.123573	0.266482	0.979486	0.0945447
710	1-palmitoyl-2-oleoyl-GPE (16:0/18:1)	433	TRUE	-1.27532	0.34946	0.0878062	-0.0828295	0.329816	0.0117214	0.0252541	2.3098	-4.915	0.144753	0.00989396	0.505333	0.407051	0.0317543	0.501623	0.000888748	0.551054	0.194145	0.842397	0.0945447
806	stearoyl-arachidonoyl-glycerol (18:0/20:4) [1]*	433	TRUE	-1.16866	0.371007	0.0342912	-0.0365242	0.572381	0.0216637	0.000778419	9.82876	4.37307	0.208126	0.00989399	0.80643	0.730574	0.000447382	0.242095	0.923128	0.0168684	0.276527	0.957854	0.0945447
782	2-myristoyl-GPC (14:0)*	433	TRUE	-0.605557	0.339194	0.0471723	0.16687	-0.0785254	0.00952959	0.00151652	9.91448	-1.6163	0.477311	0.0101848	0.713425	0.0864962	0.599777	0.575042	0.83771	0.00863359	0.661243	0.922678	0.0945447
384	glucuronide of piperine metabolite C17H21NO3 (3)*	433	TRUE	-1.34958	0.344379	-0.110944	0.177288	0.208859	0.00886298	0.0302051	-9.21435	-6.11739	0.118912	0.0102122	0.39508	0.0729528	0.169401	0.60768	5.90233e-05	0.0162539	0.102482	0.795359	0.0945447
714	1-stearoyl-2-linoleoyl-GPI (18:0/18:2)	433	TRUE	-1.3146	0.339991	-0.0106425	-0.279116	-0.622294	0.0359444	-0.0085917	-1.97978	-6.85679	0.12395	0.010219	0.934149	0.00424687	3.37354e-05	0.0349658	0.247205	0.601006	0.0637737	0.9841	0.0945447
477	sulfate of piperine metabolite C16H19NO3 (2)*	433	TRUE	-0.0618483	0.345734	-0.0229577	0.213982	0.0511105	-0.00390365	0.00489713	-1.63656	-4.80364	0.94327	0.0102353	0.860891	0.0311526	0.737741	0.821852	0.516681	0.670821	0.20166	0.963954	0.0945447
210	2,3-dihydroxyisovalerate	433	TRUE	0.910956	0.33802	-0.102732	0.19794	0.282244	-0.0137988	-0.0146083	7.14369	3.22672	0.285019	0.0104431	0.423779	0.0420012	0.0592737	0.416868	0.0484755	0.058433	0.381645	0.807886	0.0954801
583	trimethylamine N-oxide	433	TRUE	-1.97154	0.328937	-0.0127095	0.303698	-0.0360572	0.0361088	0.00401025	6.37842	7.74301	0.0186795	0.0113105	0.91988	0.00151766	0.806517	0.0308167	0.581923	0.0858904	0.032851	0.982346	0.101681
845	glucuronide of piperine metabolite C17H21NO3 (4)*	433	TRUE	-1.21672	0.340132	-0.0867884	0.20504	0.173447	0.00599966	0.0294507	-8.74218	-5.67712	0.160613	0.0113484	0.506728	0.0384856	0.254767	0.728718	9.28794e-05	0.0228799	0.130441	0.842397	0.101681
395	phenol sulfate	433	TRUE	-0.673722	0.344901	-0.12646	0.323403	0.222546	0.0049135	0.00914251	-2.15045	-3.04593	0.444304	0.0114762	0.340804	0.00130785	0.15021	0.779724	0.232207	0.581546	0.424312	0.780974	0.101808
562	glycochenodeoxycholate 3-sulfate	433	TRUE	-0.964746	0.332102	0.0984517	0.313495	-0.00618154	0.00417226	0.0174603	-4.16851	-5.38009	0.258598	0.0120612	0.444363	0.00131152	0.967123	0.806509	0.0186162	0.270543	0.145542	0.820927	0.105949
745	1-(1-enyl-stearoyl)-2-linoleoyl-GPE (P-18:0/18:2)*	433	TRUE	-0.48781	0.328352	-0.250186	0.145157	-0.420517	0.027208	-0.0304298	-10.6245	-0.675779	0.565943	0.0126231	0.0507951	0.134849	0.00483631	0.108469	3.76819e-05	0.00477105	0.854235	0.548343	0.109345
653	1-linolenoyl-GPE (18:3)*	433	TRUE	-0.88007	0.329695	0.18631	0.224833	-0.0448551	0.0153467	-0.00213024	6.58251	-2.10249	0.302719	0.0126918	0.147761	0.0211794	0.764861	0.367599	0.774028	0.0818622	0.56948	0.694084	0.109345
524	1-eicosapentaenoyl-GPE (20:5)*	433	TRUE	-0.720022	0.308989	-0.0998916	0.267235	0.0682212	0.0265068	-0.0244599	5.56824	3.95952	0.369376	0.0128964	0.408693	0.00354173	0.628181	0.0975872	0.000448842	0.117132	0.254119	0.801319	0.11005
622	1-myristoyl-2-palmitoyl-GPC (14:0/16:0)	433	TRUE	0.165851	0.32474	0.110041	-0.154365	-0.0519874	-0.00413221	0.00215523	12.4886	1.80464	0.844954	0.0134449	0.389335	0.111092	0.727052	0.807024	0.769919	0.000887651	0.623003	0.795359	0.113648
835	X - 17340	433	TRUE	-1.29399	0.299139	0.0231939	0.889134	0.103863	-0.00184074	0.0346576	0.855281	-4.94434	0.0987423	0.0137501	0.844354	3.071e-23	0.450507	0.906274	3.59532e-07	0.805437	0.145007	0.961265	0.115141
385	N-acetyl-2-aminooctanoate*	433	TRUE	-1.14582	0.319957	-0.17199	0.686042	-0.0794817	0.0326067	-0.022882	5.68806	5.62322	0.174345	0.0143452	0.176154	1.0846e-12	0.591591	0.0526378	0.00179615	0.127988	0.123541	0.704927	0.11675
439	uracil	433	TRUE	-0.0709515	0.317181	0.186267	0.145812	0.0798195	-0.00378405	0.00336157	-1.16595	-4.47767	0.932391	0.0143597	0.139519	0.126969	0.586822	0.820557	0.643653	0.753001	0.216129	0.68686	0.11675
684	urate	433	TRUE	-2.62861	0.260632	-0.180023	0.984742	0.204046	0.0173951	0.0494664	-0.17543	-1.4901	0.000132793	0.0144552	0.0825296	5.0552e-36	0.0912189	0.204901	1.27272e-16	0.954096	0.616769	0.614329	0.11675
176	5,6-dihydrothymine	433	TRUE	-1.21981	-0.338693	0.0761129	0.140325	-0.252289	0.0112126	0.0222733	10.8658	1.63869	0.172431	0.0144634	0.572191	0.169445	0.108078	0.529503	0.00413874	0.00607999	0.671957	0.863103	0.11675
683	X - 16087	433	TRUE	-0.40268	0.315949	-0.0725906	0.359094	0.176438	-0.00168656	0.0123218	-2.32616	-2.93898	0.630395	0.0148075	0.564979	0.000172599	0.229948	0.919525	0.0901619	0.53039	0.41718	0.86214	0.11701
602	X - 18922	433	TRUE	-0.193738	0.329863	0.148486	-0.0573792	-0.0787764	0.00421801	-0.00106059	-8.74955	-1.02479	0.824677	0.0148998	0.259982	0.565742	0.608009	0.808938	0.888995	0.0239269	0.786608	0.731074	0.11701
790	pyruvate	433	TRUE	-0.177533	0.341473	0.207697	0.167528	0.273882	-0.00750168	0.0163644	0.144136	-2.65833	0.844532	0.0149004	0.128002	0.105269	0.0849582	0.677843	0.0374934	0.971333	0.49754	0.677913	0.11701
209	hydroquinone sulfate	433	TRUE	0.0688523	0.325895	0.0506122	0.225177	0.111172	-0.0135538	0.0159757	0.602556	0.689997	0.936636	0.0151408	0.69824	0.0228523	0.464836	0.432718	0.0337569	0.875213	0.853971	0.920034	0.11701
54	X - 21285	433	TRUE	0.402713	0.296287	0.178623	0.65632	0.113459	-0.0178824	0.00519499	-4.65486	-4.77401	0.609115	0.0151626	0.132405	2.99075e-13	0.41204	0.254994	0.447752	0.182168	0.161393	0.677913	0.11701
766	1-palmitoyl-2-eicosapentaenoyl-GPC (16:0/20:5)*	433	TRUE	-0.503855	0.3072	-0.00708829	0.0677932	0.167755	0.02165	-0.0215339	6.89923	3.97841	0.538207	0.0154125	0.954188	0.468477	0.243239	0.184865	0.0024647	0.0571119	0.261517	0.986869	0.11701
506	2-oleoyl-GPC (18:1)*	433	TRUE	-0.435661	0.293778	0.133202	0.301762	-0.164683	0.0318402	-0.0471057	12.3266	1.851	0.578153	0.0154958	0.259333	0.000747185	0.231336	0.041605	4.51659e-12	0.000383106	0.585185	0.731074	0.11701
667	erythronate*	433	TRUE	-0.990428	0.297174	-0.299397	0.303025	0.240245	0.00515914	0.0202859	6.27673	-3.31092	0.211588	0.0155404	0.0122354	0.000820939	0.0844517	0.744258	0.00323216	0.0739411	0.334666	0.423324	0.11701
334	1-stearoyl-2-oleoyl-GPE (18:0/18:1)	433	TRUE	-1.67524	0.338383	0.0119958	0.110679	0.119092	0.0234509	0.0175421	-0.650227	-4.10638	0.0640928	0.0157703	0.929909	0.284259	0.453562	0.193815	0.0256548	0.871136	0.294405	0.982346	0.117752
13	S-allylcysteine	433	TRUE	-0.0905269	0.306609	0.0734354	0.289174	-0.256648	0.00563313	-0.0126417	-4.12685	-9.85819	0.913228	0.0172002	0.55758	0.00231165	0.0785627	0.733908	0.079889	0.26217	0.00611733	0.86214	0.127367
573	X - 22162	433	TRUE	-0.845629	0.290567	-0.134531	-0.0286505	0.0267507	0.0292725	-0.0199959	10.3698	-1.28923	0.284121	0.0175115	0.258266	0.750737	0.847008	0.063056	0.00355724	0.00302888	0.70598	0.731074	0.128609
98	N-formylmethionine	433	TRUE	-0.35657	0.306013	-0.136414	0.0543457	0.177024	0.00335157	0.00685534	4.67789	8.76643	0.668455	0.0176647	0.277039	0.567743	0.226015	0.840066	0.343315	0.204719	0.0149953	0.742648	0.128679
775	1-linoleoyl-GPC (18:2)	433	TRUE	0.234625	0.28164	-0.190416	0.493972	-0.416555	0.0227288	-0.0547324	1.8708	-4.24977	0.759767	0.0178149	0.0996743	1.74544e-08	0.00199267	0.137531	2.2167e-16	0.582074	0.200693	0.662222	0.128727
306	1-palmitoyl-2-linoleoyl-GPC (16:0/18:2)	433	TRUE	-1.93465	0.306187	0.0387328	-0.178933	-0.670377	0.0499641	-0.0125465	-0.736185	-10.9496	0.0207054	0.0181113	0.758646	0.0610865	5.01068e-06	0.00274372	0.0842379	0.8425	0.00248859	0.938722	0.129822
584	1-arachidonoyl-GPC (20:4n6)*	433	TRUE	-0.666207	0.302881	-0.0734066	0.425429	0.0861863	0.0166353	-0.0144834	9.92307	3.64631	0.422512	0.0185788	0.557661	7.34303e-06	0.554629	0.315356	0.0447661	0.00700447	0.310498	0.86214	0.132116
194	gamma-glutamyltyrosine	433	TRUE	-2.58555	0.277288	-0.132867	0.513033	-0.121314	0.0209952	0.0502292	0.793653	-2.03626	0.000704709	0.0190122	0.248103	3.99915e-09	0.365415	0.167863	3.60507e-14	0.814421	0.537644	0.731074	0.134134
740	X - 15486	433	TRUE	-1.22695	0.310965	-0.0369475	0.205722	-0.0482305	0.00557469	0.0303942	-5.1471	-0.113372	0.15367	0.0195896	0.775624	0.0362625	0.749469	0.745204	4.75076e-05	0.176712	0.975704	0.943664	0.136416
405	X - 12411	433	TRUE	-0.0163751	0.295613	0.0383164	0.342441	0.245481	-0.00317829	-0.00296781	6.34551	1.18853	0.984045	0.0197825	0.75622	0.000251392	0.0878082	0.845714	0.676574	0.0802514	0.737375	0.938722	0.136416
664	1-stearyl-2-docosapentaenoyl-GPC (O-18:0/22:5n3)*	433	TRUE	2.34882	-0.298551	0.139292	0.0512873	-0.0767245	-0.0376275	-0.0173625	7.91039	1.86779	0.00451042	0.0197925	0.263833	0.587238	0.597326	0.0225554	0.0156838	0.0308518	0.601845	0.734144	0.136416
679	2-palmitoyl-GPE (16:0)*	433	TRUE	0.405162	0.297022	0.116481	0.0112417	0.0200058	0.0166065	-0.0466022	10.2088	-1.23382	0.623737	0.020262	0.349453	0.905159	0.890299	0.313451	8.35937e-11	0.00526993	0.730003	0.783621	0.138586
834	palmitoyl-arachidonoyl-glycerol (16:0/20:4) [2]*	433	TRUE	-1.0874	0.291744	0.0852515	0.280919	0.572998	-0.0135438	0.0557799	4.33958	1.83367	0.182261	0.0208858	0.487834	0.00255858	6.27763e-05	0.404926	3.41832e-15	0.229551	0.603327	0.840575	0.14177
131	arabonate/xylonate	433	TRUE	0.311405	0.303619	-0.162487	-0.082536	0.0462548	0.00632322	-0.0240597	7.96124	0.87938	0.715826	0.0219516	0.207594	0.398328	0.758158	0.710949	0.00120745	0.0356606	0.81227	0.720701	0.147884
105	1-stearoyl-GPE (18:0)	433	TRUE	-0.361765	0.28016	-0.12981	0.117928	0.00832625	0.0229368	-0.0288507	5.0198	-7.21121	0.649605	0.0231392	0.279468	0.194847	0.952522	0.148727	3.0474e-05	0.154753	0.0364252	0.742648	0.153792
17	carboxyethyl-GABA	433	TRUE	-1.68562	0.290522	-0.119019	0.126114	-0.129439	0.0312475	0.00185036	0.661969	-5.06934	0.0413369	0.0232203	0.339235	0.181505	0.372365	0.0579628	0.796601	0.856488	0.156351	0.780974	0.153792
187	oleoyl-arachidonoyl-glycerol (18:1/20:4) [1]*	433	TRUE	-2.13135	0.297263	0.0952204	0.283771	0.566889	0.0181178	0.0380387	6.13985	0.0559352	0.0117734	0.0233434	0.455318	0.00332855	0.000136278	0.283077	2.29292e-07	0.101449	0.987815	0.827515	0.153792
457	2-linoleoyl-GPE (18:2)*	433	TRUE	-1.22043	0.286486	0.0803237	0.195786	-0.380153	0.027948	-0.00926226	2.85847	-2.56239	0.135005	0.023522	0.513994	0.0358237	0.00802482	0.0861758	0.191714	0.429414	0.46846	0.84615	0.153837
174	2-hydroxy-3-methylvalerate	433	TRUE	0.126453	0.259286	-0.0787853	0.867161	0.129076	-0.0182819	0.0111254	8.14136	-1.10481	0.865865	0.0253695	0.485059	3.68833e-24	0.32622	0.220855	0.0871986	0.0140995	0.733151	0.839393	0.164718
565	1-palmitoyl-2-linoleoyl-GPE (16:0/18:2)	433	TRUE	-0.624607	0.305358	-0.0941166	-0.158157	-0.0512321	0.0126226	0.00452525	-4.03775	-6.87475	0.480355	0.0259371	0.480501	0.117757	0.741693	0.474613	0.556224	0.303112	0.0727309	0.838218	0.165921
5	tryptophan	433	TRUE	-0.577268	0.275975	0.103257	0.624171	-0.0186594	0.00187486	0.00706223	5.61219	0.497079	0.471282	0.0262051	0.392613	9.2049e-12	0.894516	0.906626	0.310429	0.113906	0.886045	0.795359	0.165921
794	methionine sulfoxide	433	TRUE	-0.13127	0.297908	-0.121571	-0.130058	0.116571	0.00462362	-0.00713118	-0.220136	4.28282	0.879492	0.0263472	0.35158	0.188545	0.443299	0.78892	0.343171	0.954235	0.253138	0.783621	0.165921
183	gentisate	433	TRUE	0.379135	0.281331	0.0608291	0.0158372	-0.202037	0.00442996	-0.0234812	0.174315	6.93787	0.643143	0.0264712	0.621903	0.865473	0.159772	0.78609	0.000958428	0.961651	0.0501525	0.885891	0.165921
589	propionylglycine	433	TRUE	0.766187	0.291312	-0.0591104	-0.14046	-0.204819	0.00829736	-0.0379092	13.0655	12.9108	0.365913	0.0264807	0.643527	0.146798	0.168736	0.623517	2.62373e-07	0.000500985	0.000431853	0.903762	0.165921
560	1-(1-enyl-palmitoyl)-2-linoleoyl-GPE (P-16:0/18:2)*	433	TRUE	0.177552	0.287814	-0.321713	0.209437	-0.283158	0.00375369	-0.0157715	-15.4424	1.67444	0.832988	0.0273465	0.0112487	0.0294534	0.0555045	0.82315	0.0311008	3.47602e-05	0.645927	0.423324	0.170156
103	1-stearoyl-2-arachidonoyl-GPI (18:0/20:4)	433	TRUE	-2.60865	0.300425	0.0687231	-0.0469415	-0.0996268	0.0464694	0.0139755	6.1416	-9.85125	0.00311101	0.0279545	0.605341	0.641425	0.52026	0.00828286	0.0683099	0.116143	0.0098973	0.877646	0.172519
715	allantoin	433	TRUE	-0.635008	0.293164	-0.123476	0.421806	0.106512	0.00786893	-0.000277899	6.62688	-0.989035	0.461576	0.028224	0.342218	1.86026e-05	0.481935	0.647393	0.970419	0.0828603	0.79107	0.782212	0.172519
247	1-margaroyl-2-docosahexaenoyl-GPC (17:0/22:6)*	433	TRUE	1.34358	-0.26902	-0.0495562	-0.143363	0.120984	0.00556862	-0.052814	-6.89023	2.05939	0.089742	0.0283039	0.678	0.113008	0.384307	0.724425	1.63893e-14	0.0495191	0.547953	0.912651	0.172519
361	sphingomyelin (d18:1/20:1, d18:2/20:0)*	433	TRUE	-1.82568	-0.286993	-0.153657	-0.507856	-0.33969	0.0309351	0.020929	-2.11419	0.10001	0.0320813	0.0296311	0.231378	1.79683e-07	0.0231561	0.0686454	0.00468507	0.575298	0.97836	0.730571	0.178658
629	3-carboxy-4-methyl-5-pentyl-2-furanpropionate (3-CMPFP)**	433	TRUE	0.713497	0.296095	-0.199699	0.155519	0.181123	-0.00234216	-0.0227625	-1.59251	-0.632676	0.417066	0.0297099	0.13184	0.121531	0.240783	0.893759	0.00288558	0.68265	0.867965	0.677913	0.178658
748	X - 12822	433	TRUE	-1.41835	0.282791	-0.290965	0.696214	0.00875478	0.0208271	0.00414064	-0.343176	-1.67507	0.0926298	0.0304349	0.0220944	4.97933e-13	0.952868	0.215727	0.572056	0.926822	0.646357	0.44604	0.181643
633	phenylpyruvate	433	TRUE	-0.25067	0.283146	0.0730152	0.474115	0.109079	-0.00053146	0.000411244	3.0197	0.682624	0.766832	0.0306118	0.566637	9.1382e-07	0.462508	0.974857	0.955352	0.420077	0.852014	0.86214	0.181643
721	1-oleoyl-2-linoleoyl-GPE (18:1/18:2)*	433	TRUE	-0.361174	0.293146	-0.0990762	-0.135678	-0.133413	0.0189731	-0.0169737	-2.48328	-4.74085	0.68073	0.0310988	0.45396	0.176038	0.386788	0.278535	0.0260454	0.523095	0.212118	0.826723	0.183208
369	sphingomyelin (d18:1/20:2, d18:2/20:1, d16:1/22:2)*	433	TRUE	-0.329166	-0.263427	-0.157416	-0.521538	-0.325987	-0.0103725	0.0371963	-2.32747	1.27171	0.67679	0.0312844	0.185988	7.40682e-09	0.0187399	0.510207	5.91698e-08	0.505856	0.70985	0.708224	0.183208
23	X - 12100	433	TRUE	-1.80394	0.269217	-0.22518	0.157953	-0.196397	0.0261625	0.0152949	12.7501	3.51668	0.0256137	0.0315362	0.064541	0.0871251	0.166454	0.104624	0.0294036	0.000369542	0.314785	0.586304	0.183483
63	sphingomyelin (d18:1/25:0, d19:0/24:1, d20:1/23:0, d19:1/24:0)*	433	TRUE	-1.2511	-0.270515	-0.00485518	0.311621	-0.367824	0.0135371	0.0198638	6.02558	0.503855	0.124686	0.0321108	0.968468	0.000814949	0.0101589	0.404922	0.00502174	0.095084	0.886406	0.986869	0.185402
843	oleoylcholine	433	TRUE	-0.904385	0.285971	-0.152038	-0.0429247	-0.310774	0.0343258	-0.0257006	5.70465	-1.63055	0.294233	0.0322798	0.242073	0.662997	0.0401385	0.0459575	0.000602497	0.135334	0.662198	0.731074	0.185402
743	1-palmitoyl-2-adrenoyl-GPC (16:0/22:4)*	433	TRUE	-1.43406	0.2753	0.139936	-0.0531629	-0.0602967	0.0113374	0.0321589	9.00109	0.410949	0.0850033	0.0328109	0.264838	0.576212	0.680073	0.494833	8.77696e-06	0.0146787	0.909217	0.734659	0.187252
707	2-ketocaprylate	433	TRUE	-0.747192	0.288839	-0.011975	0.233243	-0.226381	0.0372794	-0.0399663	-2.46361	0.224358	0.393227	0.0331319	0.927668	0.0196498	0.140771	0.0327192	1.47295e-07	0.525157	0.952772	0.982346	0.187887
511	phosphatidylcholine (14:0/14:0, 16:0/12:0)	433	TRUE	-0.0485801	0.280324	0.0470783	-0.0781661	-0.115729	0.00229337	-0.00155526	9.31422	1.55443	0.954467	0.0334352	0.713548	0.421279	0.438623	0.892508	0.833371	0.0134719	0.67297	0.922678	0.188415
576	N-acetylphenylalanine	433	TRUE	-0.231288	0.250789	-0.152225	0.504693	-0.0938331	-0.0184055	0.0359356	7.67013	-0.777722	0.762279	0.0342385	0.186567	7.56343e-09	0.484689	0.227521	6.33519e-08	0.0235563	0.814221	0.708224	0.191736
693	3-(4-hydroxyphenyl)lactate	433	TRUE	-1.25357	0.240609	-0.134004	0.846695	0.0867858	0.00182312	0.0302612	4.76005	4.41222	0.0882577	0.0346793	0.226686	6.86384e-24	0.501586	0.901088	2.17912e-06	0.143993	0.165706	0.730571	0.192998
502	N-acetylcitrulline	433	TRUE	-0.774598	0.270254	-0.284342	0.386462	-0.0269061	-0.00986922	0.0409398	12.0939	4.15879	0.349176	0.0349907	0.0226112	4.3389e-05	0.853097	0.549851	1.23568e-08	0.000969153	0.245556	0.44604	0.193211
184	X - 17690	433	TRUE	-0.133974	0.277645	-0.0329422	0.442591	-0.173443	0.00517602	-0.00941647	9.88559	4.95886	0.875006	0.0353485	0.797483	5.39236e-06	0.246217	0.760616	0.203207	0.00879419	0.178591	0.953916	0.193211
75	phosphatidylethanolamine (P-18:1/20:4, P-16:0/22:5n3)*	433	TRUE	-0.032686	0.275056	-0.171109	0.11503	-0.20496	0.0020402	-0.00587943	-6.30656	-3.04471	0.969106	0.035392	0.178595	0.232823	0.166704	0.903538	0.422674	0.0916521	0.404582	0.705221	0.193211
588	pregnenediol sulfate (C21H34O5S)*	433	TRUE	2.09364	-0.233518	0.269553	0.792376	-0.190635	-0.0442362	-0.0111782	0.942934	-3.94592	0.00351076	0.0355801	0.0126547	4.01446e-22	0.130162	0.00198815	0.0728581	0.766655	0.203727	0.423324	0.193211
771	4-hydroxyhippurate	433	TRUE	-0.116295	0.275094	-0.0946142	-0.205282	0.329856	0.00391844	-0.00460251	-4.3672	1.01449	0.890657	0.0358042	0.458085	0.0336549	0.0264006	0.816372	0.531206	0.243907	0.781742	0.830859	0.193257
616	3-formylindole	433	TRUE	0.16546	0.286025	0.0247974	0.373671	-0.00915301	0.00937876	-0.0282003	8.73767	2.94848	0.851043	0.0361272	0.851885	0.000205335	0.952831	0.593598	0.000229995	0.0251934	0.439469	0.962534	0.193269
496	X - 12680	433	TRUE	-0.777533	0.280529	-0.190076	0.168389	0.0473993	0.00995574	0.00703932	5.67566	1.19485	0.368542	0.036238	0.144741	0.0882555	0.754938	0.563797	0.348788	0.138447	0.749548	0.694084	0.193269
597	2-methylbutyrylcarnitine (C5)	433	TRUE	-1.20957	0.246717	-0.0662875	0.85932	0.291858	-0.00192623	0.0324653	1.41456	-0.286118	0.113057	0.0369431	0.564531	6.56104e-23	0.0294694	0.89933	9.83321e-07	0.675732	0.930994	0.86214	0.195864
733	decadienedioic acid (C10:2-DC)**	433	TRUE	-2.12111	0.261076	-0.149576	-0.32502	-0.0915723	0.029368	0.0290175	9.11074	-1.0924	0.00888373	0.037628	0.220919	0.000448857	0.520093	0.0693488	3.79515e-05	0.0111878	0.755564	0.724041	0.198321
329	cyclo(ala-pro)	433	TRUE	-0.445057	0.277445	-0.318968	0.396245	-0.036542	0.00565245	0.00345712	2.46195	0.241537	0.606235	0.0380568	0.0142516	5.88894e-05	0.809564	0.742764	0.644928	0.519824	0.948471	0.425647	0.199409
440	alpha-hydroxyisovalerate	433	TRUE	-0.407983	0.247891	-0.102937	0.580672	0.00372842	-0.00259539	0.00924235	5.48415	2.25676	0.598092	0.0386817	0.377572	5.11399e-11	0.978116	0.866491	0.16932	0.109722	0.500538	0.795359	0.201505
528	pseudouridine	433	TRUE	-1.14118	0.267402	-0.217481	0.133735	0.145617	0.0173376	0.0100797	14.9308	3.98263	0.172193	0.0389273	0.0843369	0.161377	0.321235	0.298437	0.165197	5.53617e-05	0.271032	0.619392	0.201612
557	N-acetylserine	433	TRUE	0.268738	0.265817	-0.107473	-0.0275747	0.0466025	-0.00615645	0.00260056	9.24994	7.12462	0.747323	0.0396801	0.392674	0.772298	0.750392	0.711379	0.719737	0.0123129	0.04847	0.795359	0.203627
571	X - 11852	433	TRUE	0.0196161	0.278859	0.0758036	0.222832	0.0538677	0.0011016	-0.00894017	2.88185	5.66458	0.982124	0.0397709	0.565673	0.0258789	0.72607	0.949702	0.239881	0.45747	0.134968	0.86214	0.203627
482	gamma-glutamylglutamine	433	TRUE	-0.163875	-0.228337	0.0771239	0.213232	-0.260979	0.0129125	-0.0180186	2.84638	0.0116702	0.820021	0.0407187	0.477471	0.0095573	0.0390961	0.368793	0.00398748	0.372389	0.997013	0.838218	0.206295
751	guaiacol sulfate	433	TRUE	-0.428841	0.273478	-0.055786	0.345248	0.000468071	0.0216629	-0.0266658	-7.37151	2.43005	0.619714	0.0410662	0.668446	0.000470094	0.997539	0.208847	0.000383129	0.0541701	0.515917	0.912651	0.206295
676	1-(1-enyl-palmitoyl)-2-arachidonoyl-GPE (P-16:0/20:4)*	433	TRUE	0.509639	0.26848	-0.132896	0.146816	-0.0157863	-0.0126599	-0.00155924	-7.87904	-1.32176	0.548289	0.0412036	0.299008	0.130063	0.915674	0.454697	0.832586	0.0361771	0.719075	0.746611	0.206295
139	arachidonoylcholine	433	TRUE	-0.978472	0.273172	-0.0866193	-0.0187953	-0.146224	0.0282086	-0.0150995	6.38322	-0.511872	0.257326	0.041213	0.505885	0.848945	0.335103	0.101606	0.0442427	0.0953189	0.891111	0.842397	0.206295
74	1-myristoyl-2-linoleoyl-GPC (14:0/18:2)*	433	TRUE	-0.194825	0.268879	0.105224	-0.232969	-0.280227	-0.0028585	0.0156179	0.290887	-7.04928	0.819694	0.0422891	0.414075	0.017036	0.0619216	0.86685	0.0354667	0.938767	0.0567343	0.801319	0.209175
434	phosphatidylcholine (15:0/18:1, 17:0/16:1, 16:0/17:1)*	433	TRUE	-0.87371	0.255024	0.177482	-0.19195	-0.154691	0.018299	0.00366721	12.6566	0.290427	0.281265	0.0423394	0.146476	0.0382536	0.277362	0.257916	0.602717	0.000426446	0.934055	0.694084	0.209175
868	dopamine 3-O-sulfate	433	TRUE	-0.00642197	0.261089	-0.0331992	0.0794448	0.103573	0.0122127	-0.0231202	5.68678	6.13449	0.993832	0.0424887	0.790916	0.40254	0.477767	0.461139	0.00136015	0.122318	0.0880239	0.948675	0.209175
696	homostachydrine*	433	TRUE	-1.39571	0.274168	0.036263	0.154373	-0.0604667	0.0246328	0.00248189	-4.69884	2.49397	0.110829	0.0431925	0.783437	0.122646	0.694069	0.158311	0.74418	0.225636	0.510396	0.943664	0.211478
343	gamma-glutamyl-epsilon-lysine	433	TRUE	0.412209	-0.283949	-0.113727	0.149654	0.0535585	-0.0157238	0.0105992	-2.22526	-5.67052	0.649709	0.0434338	0.405804	0.148919	0.736862	0.385115	0.178937	0.579978	0.148915	0.801319	0.211504
175	N-acetyl-isoputreanine	433	TRUE	-0.478959	0.255076	-0.166665	-0.13547	-0.110887	0.0217161	-0.0184501	3.58693	-5.11723	0.558699	0.0443962	0.177018	0.147663	0.440766	0.183781	0.00952639	0.322898	0.148912	0.704927	0.215021
779	9-hydroxystearate	433	TRUE	-0.920485	0.240971	0.232176	-0.825951	-0.297054	0.0241587	-4.19366e-05	8.36388	-3.05284	0.239729	0.0469524	0.0491436	2.59823e-20	0.0307438	0.12189	0.995081	0.0158968	0.367695	0.543613	0.226179
60	stearoyl sphingomyelin (d18:1/18:0)	433	TRUE	-1.71842	-0.267578	-0.114406	-0.123075	-0.214209	0.0176753	0.0347452	-2.97712	1.2591	0.0494245	0.0482657	0.38546	0.21799	0.163107	0.310959	4.82027e-06	0.442254	0.739431	0.795359	0.231262
861	beta-hydroxyisovalerate	433	TRUE	0.876151	0.271425	-0.0851143	0.612383	0.0879128	-0.0260148	0.00457504	-3.16765	0.699199	0.324395	0.0487584	0.525345	1.64593e-09	0.573405	0.142401	0.55369	0.421272	0.85583	0.846475	0.231982
324	1-palmitoleoyl-2-linolenoyl-GPC (16:1/18:3)*	433	TRUE	-0.615121	0.273087	0.101643	-0.224071	-0.160987	0.0158768	-0.00369593	0.0286625	-3.42237	0.492679	0.0492867	0.451994	0.0286979	0.306598	0.374687	0.635201	0.994243	0.377872	0.826503	0.231982
513	1,5-anhydroglucitol (1,5-AG)	433	TRUE	-1.72887	-0.249195	0.182737	0.343861	-0.167328	0.0220454	0.0188369	8.79943	-2.01909	0.0348478	0.0496078	0.138957	0.000238972	0.244869	0.177365	0.00814417	0.0153412	0.569136	0.68686	0.231982
822	deoxycholate	433	TRUE	0.216145	0.265698	-0.183416	0.159524	-0.00118277	-0.0118373	0.00845422	1.17255	-1.31371	0.804597	0.0496286	0.163679	0.109967	0.993849	0.496978	0.265405	0.761933	0.7283	0.703603	0.231982
45	X - 19141	433	TRUE	-0.315239	0.249231	0.00590403	0.173585	-0.227885	0.0118619	-0.0113255	19.6625	4.67143	0.700587	0.0497104	0.961893	0.0638147	0.113462	0.468223	0.111846	6.17182e-08	0.188032	0.986869	0.231982
371	5alpha-androstan-3beta,17beta-diol monosulfate (2)	433	TRUE	0.897178	0.23924	-0.161562	0.937138	0.281445	-0.0232018	-0.00557739	-0.292945	-3.45762	0.2564	0.0507484	0.175129	3.14543e-25	0.0426329	0.141179	0.416781	0.933337	0.312264	0.704927	0.234485
199	lactate	433	TRUE	0.0790765	0.272208	0.215084	0.375571	0.23446	-0.0128828	0.0134324	-2.65504	-2.42702	0.929949	0.0507703	0.112668	0.000257375	0.137766	0.472767	0.0856838	0.505259	0.53307	0.668546	0.234485
464	1,2-dilinoleoyl-GPC (18:2/18:2)	433	TRUE	0.130102	0.242685	-0.0688855	-0.01456	-0.548725	0.0249628	-0.0466164	-2.00789	-3.36142	0.87183	0.0520599	0.570907	0.874419	0.000106811	0.120694	2.87062e-11	0.5741	0.335553	0.862619	0.239208
11	sphingomyelin (d18:1/18:1, d18:2/18:0)	433	TRUE	-2.03142	-0.241646	-0.164018	-0.429217	-0.068048	0.0222366	0.0419527	-1.67023	-0.187787	0.0116915	0.0528621	0.176835	3.11219e-06	0.630575	0.166477	2.06298e-09	0.639838	0.957058	0.704927	0.239664
648	1,2-dipalmitoyl-GPC (16:0/16:0)	433	TRUE	-0.222411	0.262869	0.114069	-0.015931	-0.542591	0.012864	-0.0149747	4.68453	-3.22707	0.799734	0.0529274	0.388026	0.873616	0.000424903	0.46197	0.0493174	0.227774	0.395111	0.795359	0.239664
735	bilirubin (Z,Z)	433	TRUE	-0.140341	0.24998	0.0862537	0.332133	-0.170533	0.0124842	-0.0224037	-0.378815	0.565928	0.86634	0.0529614	0.492543	0.00048895	0.244204	0.4529	0.00198613	0.918323	0.875404	0.842397	0.239664
207	1-(1-enyl-stearoyl)-2-docosapentaenoyl-GPE (P-18:0/22:5n3)*	433	TRUE	-0.737013	0.24007	-0.063218	0.181191	-0.154504	0.0190342	-0.0115387	-3.56623	0.262756	0.359408	0.05397	0.601988	0.048573	0.27395	0.235381	0.0986577	0.316825	0.939828	0.877646	0.243001
728	sphingomyelin (d18:2/24:2)*	433	TRUE	0.276398	-0.237514	-0.0759785	-0.558005	-0.432915	-0.0160157	0.0252704	-5.07435	-0.478116	0.7288	0.0544442	0.527181	8.93663e-10	0.00198634	0.313841	0.000263908	0.150772	0.889798	0.846475	0.24391
201	2-palmitoyl-GPC (16:0)*	433	TRUE	-0.243809	0.251494	0.136191	0.259148	-0.0761277	0.0151488	-0.0234508	10.636	-2.12522	0.773213	0.0550031	0.285544	0.0073343	0.608398	0.369375	0.00142226	0.00454481	0.5617	0.746611	0.245188
612	2-linoleoyl-GPC (18:2)*	433	TRUE	-0.277119	0.237492	0.0383567	0.432457	-0.418084	0.0283837	-0.0479511	9.19221	1.56855	0.72922	0.0554913	0.750582	2.25936e-06	0.00294177	0.0754899	5.43515e-12	0.00954664	0.650794	0.938361	0.245985
796	stearoyl-arachidonoyl-glycerol (18:0/20:4) [2]*	433	TRUE	-1.17312	0.257625	-0.00359496	-0.0654294	0.340955	0.0163624	0.011197	0.261275	-0.184173	0.177159	0.0557309	0.978111	0.509971	0.0255203	0.345342	0.138209	0.945909	0.960961	0.986869	0.245985
668	hydroxypalmitoyl sphingomyelin (d18:1/16:0(OH))**	433	TRUE	-1.24486	-0.241381	-0.22379	-0.15812	-0.663337	0.0380903	-0.0120445	-10.4609	2.31065	0.12688	0.0560416	0.068664	0.0896415	3.62563e-06	0.0191995	0.0891567	0.00378537	0.512726	0.609138	0.246099
106	1-(1-enyl-stearoyl)-2-arachidonoyl-GPE (P-18:0/20:4)*	433	TRUE	-0.0651922	0.254744	-0.0278771	0.111558	0.044454	0.000784661	-0.0040585	-4.47349	0.427004	0.939779	0.0566984	0.830295	0.257782	0.769266	0.963641	0.588307	0.241937	0.908986	0.961265	0.246099
564	1-linoleoyl-GPI (18:2)*	433	TRUE	-2.78714	0.264375	0.167061	-0.0581062	-0.367013	0.0457813	0.0156368	0.789387	2.54374	0.00186021	0.0567396	0.215941	0.570125	0.019639	0.0103954	0.0445144	0.842318	0.511762	0.720701	0.246099
122	X - 21834	433	TRUE	-0.611752	0.263658	0.0560372	0.126351	0.156583	0.0221181	-0.0216689	-0.868327	-2.17012	0.493644	0.0568556	0.677415	0.215865	0.318441	0.214701	0.0052618	0.826404	0.574804	0.912651	0.246099
344	androstenediol (3beta,17beta) disulfate (1)	433	TRUE	0.198377	0.241798	0.105571	0.762444	0.101905	-0.0217093	0.0175744	-2.62554	-6.18454	0.809976	0.0584994	0.395904	5.97423e-16	0.481842	0.187101	0.0142185	0.472541	0.0833008	0.795359	0.251997
27	5alpha-androstan-3beta,17beta-diol disulfate	433	TRUE	0.0783022	0.222452	-0.128862	1.10025	0.261603	-0.0142322	0.00651057	0.903804	-7.09744	0.917937	0.0588266	0.260625	8.35148e-37	0.0499887	0.347814	0.324154	0.788361	0.0309641	0.731074	0.252194
282	cyclo(pro-val)	433	TRUE	-1.38706	0.244538	-0.150993	0.272946	-0.0467679	0.0165017	0.0203479	4.9419	-3.13992	0.0975781	0.059374	0.23151	0.00432072	0.750429	0.323103	0.00515584	0.182745	0.386261	0.730571	0.252975
672	N-acetylalliin	433	TRUE	0.212606	0.242219	-0.11807	0.247905	-0.0329324	-0.00300474	-0.00612028	-1.22278	-5.39543	0.797821	0.0595733	0.345264	0.00893068	0.821245	0.855975	0.39604	0.739465	0.13313	0.783621	0.252975
22	X - 12847	433	TRUE	-1.15485	0.255978	-0.0687986	0.459117	-0.0826319	0.019849	-0.0010929	1.47434	3.29488	0.189322	0.0603714	0.603919	4.92749e-06	0.5928	0.258059	0.88632	0.705249	0.386949	0.877646	0.255154
220	1-stearoyl-2-linoleoyl-GPE (18:0/18:2)*	433	TRUE	-1.03464	0.259449	-0.145809	-0.0219864	0.0160934	0.0158204	0.0118422	-2.57654	-8.61501	0.247245	0.0610743	0.279341	0.829586	0.918375	0.3751	0.12746	0.515437	0.0260297	0.742648	0.256913
311	inosine	433	TRUE	-0.293867	0.245321	0.339005	0.0571398	-0.231552	-0.00797531	0.0228077	3.58779	-4.60782	0.729394	0.0622991	0.00810813	0.555998	0.120642	0.637884	0.00200139	0.340427	0.210163	0.406376	0.260424
410	N-acetyl-1-methylhistidine*	433	TRUE	-0.034967	0.237089	-0.217846	0.203163	0.0908257	-0.0018272	0.00173373	15.597	3.98975	0.966052	0.0624902	0.0785599	0.030418	0.529034	0.911224	0.808108	1.82661e-05	0.26191	0.614329	0.260424
886	phenylalanine	433	TRUE	-1.65088	0.236352	-0.0302135	0.475617	-0.0309186	0.00798747	0.0374285	0.420745	-4.54406	0.0441111	0.0628311	0.806907	3.84084e-07	0.83002	0.625355	1.49919e-07	0.907807	0.200517	0.957854	0.260633
781	propionylcarnitine (C3)	433	TRUE	-2.02323	0.246965	-0.17276	0.809123	0.257766	0.0207994	0.0219359	-4.46305	0.0952628	0.01841	0.0632533	0.181753	1.55619e-16	0.0872509	0.224412	0.00326685	0.240503	0.979543	0.708224	0.261175
170	X - 24556	433	TRUE	-0.928988	0.249101	0.0503846	0.350262	0.0234602	0.0329027	-0.03099	2.16137	-1.36635	0.2839	0.0636195	0.699807	0.000405108	0.877537	0.0570782	3.8854e-05	0.573597	0.71577	0.920744	0.261482
636	1-arachidonylglycerol (20:4)	433	TRUE	-1.50757	0.245102	-0.123949	-0.2983	-0.0431161	0.0290723	0.00588114	8.23803	5.01443	0.0783519	0.064682	0.33696	0.00229607	0.774364	0.0887863	0.429323	0.0299108	0.176156	0.780974	0.26284
642	X - 11849	433	TRUE	-0.0195648	0.234708	0.026674	-0.0586691	-0.0211463	0.00100953	0.00041606	-14.6404	-10.797	0.980969	0.0647156	0.829177	0.531216	0.883285	0.950798	0.953444	5.59909e-05	0.00235649	0.961265	0.26284
618	1-eicosapentaenoyl-GPC (20:5)*	433	TRUE	-0.493221	0.232691	-0.165666	0.335589	0.113775	0.0243428	-0.0304673	6.22049	3.86651	0.544317	0.06483	0.176677	0.000304904	0.425813	0.133576	1.62947e-05	0.0843468	0.272185	0.704927	0.26284
744	1-arachidoyl-2-arachidonoyl-GPC (20:0/20:4)*	433	TRUE	-0.0396067	0.257643	0.148846	0.0796466	-0.00352985	0.0146745	-0.0258364	1.44754	-3.47183	0.965074	0.0659629	0.274956	0.440836	0.982272	0.416034	0.0010112	0.717929	0.375222	0.739821	0.266229
360	1-stearoyl-2-arachidonoyl-GPE (18:0/20:4)	433	TRUE	-0.83821	0.253214	0.0890844	-0.112787	0.332228	0.00866198	0.014334	3.81002	-5.2962	0.346683	0.0664961	0.506998	0.267684	0.0336846	0.62589	0.0640117	0.334291	0.169549	0.842397	0.266617
322	biliverdin	433	TRUE	0.0912316	0.236302	0.116924	0.558555	-0.166527	0.00639237	-0.0237681	5.0004	-2.20584	0.912655	0.0666544	0.350998	4.13691e-09	0.254252	0.700012	0.0010056	0.174761	0.540068	0.783621	0.266617
179	5alpha-pregnan-3beta,20beta-diol monosulfate (1)	433	TRUE	2.73489	-0.229648	0.432922	-0.522083	-0.155206	-0.0523639	-0.000673113	-0.326258	-3.51721	0.000740021	0.067399	0.000394635	1.71447e-08	0.275542	0.00119998	0.923853	0.927603	0.316086	0.117864	0.268398
579	1-palmitoyl-2-stearoyl-GPC (16:0/18:0)	433	TRUE	-0.88288	0.241915	0.0120912	0.265851	-0.331761	0.0351603	-0.0333506	4.22777	-6.04894	0.304768	0.069491	0.92571	0.00682858	0.0281003	0.0404681	8.13095e-06	0.267311	0.104291	0.982346	0.27348
467	3-methylhistidine	433	TRUE	0.586924	0.239375	0.0202602	0.22834	0.424777	-0.00859298	-0.01166	12.2325	5.49035	0.490621	0.0695561	0.874565	0.0188989	0.00450111	0.612895	0.115006	0.00118338	0.136304	0.964527	0.27348
80	X - 12906	433	TRUE	0.458141	0.224507	-0.16412	0.299487	-0.0988926	0.00468093	-0.0268717	7.26619	12.21	0.566216	0.0695908	0.172786	0.00102906	0.480772	0.768893	0.000107805	0.0400151	0.000412591	0.704927	0.27348
308	androstenediol (3beta,17beta) monosulfate (2)	433	TRUE	0.88512	0.232638	0.0369742	-0.0878266	0.199912	-0.0241828	0.0105062	0.666597	-7.85811	0.287914	0.0713858	0.768365	0.355982	0.171714	0.145507	0.146564	0.856639	0.0292834	0.94033	0.279309
394	trigonelline (N'-methylnicotinate)	433	TRUE	-0.751452	0.230601	-0.0718275	0.0378889	-0.25448	0.0405396	-0.0445084	2.92458	3.34953	0.363794	0.0720197	0.564682	0.688545	0.0799066	0.0140423	5.9875e-10	0.424983	0.349688	0.86214	0.279642
52	cholate	433	TRUE	0.0905957	0.235602	0.088757	0.297815	-0.161253	-0.0141351	0.0110807	-1.11175	-4.03231	0.914681	0.0720953	0.486211	0.00204986	0.277552	0.402027	0.131524	0.766648	0.270619	0.839393	0.279642
876	3-methyl catechol sulfate (1)	433	TRUE	-2.13989	0.241879	-0.136339	0.489219	-0.0288409	0.047926	-0.0149064	4.25736	-1.52354	0.0138501	0.072533	0.2982	8.42332e-07	0.850189	0.00572149	0.048481	0.269057	0.685616	0.746611	0.280128
422	cis-4-decenoate (10:1n6)*	433	TRUE	-0.577128	-0.240144	0.0106632	-0.225829	0.117919	0.00934515	0.00855762	-12.0385	-3.22043	0.504523	0.0730349	0.9348	0.0222553	0.437477	0.587979	0.254728	0.00167603	0.389593	0.9841	0.280488
746	N-behenoyl-sphingadienine (d18:2/22:0)*	433	TRUE	-2.75186	0.238245	-0.216031	0.100163	-0.0251953	0.0501934	0.0111539	-2.51385	-5.56362	0.00134976	0.0732523	0.0950546	0.307148	0.867292	0.00338045	0.134869	0.508674	0.134376	0.640744	0.280488
581	palmitoylcholine	433	TRUE	-1.04969	0.241491	-0.166951	-0.0224274	-0.294968	0.0357657	-0.0237516	5.1343	-1.85125	0.228813	0.07391	0.204151	0.821923	0.0541581	0.0398189	0.0017248	0.183963	0.623909	0.717735	0.281802
316	glycochenodeoxycholate	433	TRUE	-0.746005	0.23469	0.0481548	0.12741	0.0781885	-0.000654587	0.0212665	-2.71812	-3.10376	0.379512	0.0743215	0.706663	0.188905	0.599955	0.969164	0.0039359	0.469834	0.39829	0.922678	0.28217
265	gamma-tocopherol/beta-tocopherol	433	TRUE	-1.40301	0.229475	-0.1655	0.090709	0.10767	0.00689723	0.0370481	-5.8158	-4.71876	0.0925572	0.0757447	0.188053	0.341118	0.462321	0.678472	3.18831e-07	0.115522	0.191223	0.708224	0.283557
151	dimethylglycine	433	TRUE	-0.55821	0.222494	-0.227306	0.393115	-0.0543063	0.0028476	0.0127067	-9.07254	-2.41433	0.49041	0.0759903	0.0624451	2.12355e-05	0.702429	0.860001	0.0707957	0.0114033	0.490755	0.585424	0.283557
813	oleoyl-arachidonoyl-glycerol (18:1/20:4) [2]*	433	TRUE	-1.70729	0.230867	0.079891	0.301522	0.712507	0.00960013	0.0378302	4.99912	3.35687	0.0421512	0.0761054	0.528149	0.00168127	1.3737e-06	0.566767	2.19486e-07	0.179261	0.355995	0.846475	0.283557
102	sphingomyelin (d18:1/22:2, d18:2/22:1, d16:1/24:2)*	433	TRUE	-0.545489	-0.219074	-0.0868379	-0.465784	-0.504365	-0.00619109	0.0368846	-0.0012148	1.41931	0.493874	0.0761197	0.469947	3.15763e-07	0.000315772	0.697071	1.01378e-07	0.999726	0.68089	0.838218	0.283557
81	tyrosine	433	TRUE	-2.12459	0.237209	-0.1065	0.16022	0.0437013	0.0160046	0.0460775	0.069884	-0.70735	0.0139045	0.0762692	0.413356	0.104432	0.773275	0.352933	8.27319e-10	0.985429	0.849943	0.801319	0.283557
248	1-arachidonoyl-GPI (20:4)*	433	TRUE	-3.27028	0.243819	0.168441	0.064778	0.0373392	0.0517375	0.0204136	2.23497	0.406837	0.000244351	0.0775033	0.210049	0.524763	0.81151	0.00362288	0.00840827	0.571496	0.91604	0.720701	0.286954
341	X - 11299	433	TRUE	1.35016	-0.217586	0.057224	0.016477	-0.00975452	-0.0155652	-0.0207357	10.7323	7.73483	0.090815	0.0785351	0.63442	0.856637	0.944536	0.328382	0.00279744	0.00241112	0.0252087	0.897999	0.289578
156	X - 12524	433	TRUE	-1.06346	0.220883	0.214684	-0.0806413	-0.188553	0.0245711	-0.00882337	1.18923	-1.95024	0.190772	0.0794131	0.0797415	0.385165	0.186559	0.129668	0.211562	0.741222	0.579387	0.614329	0.290968
873	piperine	433	TRUE	-0.26239	0.231193	-0.0307576	0.0255417	0.122969	-1.13686e-05	0.00843566	-5.04129	-4.78776	0.757891	0.0795614	0.810546	0.792813	0.410742	0.999466	0.254054	0.181282	0.193802	0.960647	0.290968
189	pyroglutamine*	433	TRUE	-0.00430475	-0.177229	-0.00967411	1.27433	0.0587418	0.00435599	-0.0223753	13.6942	3.36723	0.994752	0.0804696	0.921883	3.89805e-65	0.609313	0.73864	8.33354e-05	2.32612e-06	0.234613	0.982346	0.293093
205	X - 12849	433	TRUE	0.494912	0.23323	-0.0860866	0.108292	0.290282	-0.00795957	-0.00592256	2.81749	4.78498	0.566722	0.0813787	0.508544	0.272512	0.0557068	0.644152	0.430098	0.46163	0.200683	0.842397	0.295204
569	X - 11522	433	TRUE	-0.0102662	0.219726	0.0643696	0.444201	-0.173144	0.00968349	-0.0228771	1.55536	-3.57308	0.989959	0.0820953	0.600639	1.87543e-06	0.226839	0.551789	0.00124873	0.666936	0.3116	0.877646	0.296365
38	1-dihomo-linoleoyl-GPC (20:2)*	433	TRUE	-0.453658	0.214535	-0.23992	0.164525	-0.439177	0.0273934	-0.0338146	-2.25874	-5.00321	0.569313	0.0823604	0.0458672	0.0708318	0.00170751	0.0849519	1.05141e-06	0.522469	0.147087	0.531112	0.296365
481	X - 11261	433	TRUE	-2.10803	0.219076	-0.0156971	0.362722	0.225864	0.0189993	0.0348485	-14.6086	-6.78584	0.00970489	0.0827528	0.898339	9.80812e-05	0.11461	0.242596	8.63504e-07	5.22328e-05	0.0544464	0.972523	0.296586
99	trans-4-hydroxyproline	433	TRUE	-0.0699695	0.237631	-0.0392698	0.107672	0.443211	-0.00590453	0.00908944	0.927423	5.05233	0.937247	0.0843439	0.769408	0.288903	0.0045156	0.739079	0.239158	0.813781	0.189063	0.94033	0.301084
778	X - 23780	433	TRUE	-0.429949	0.229423	-0.0560845	0.217	-0.292258	0.0158119	-0.0142	-2.84365	-2.566	0.619528	0.0872159	0.667419	0.0282614	0.0546283	0.359968	0.0591159	0.458538	0.4936	0.912651	0.30873
95	5alpha-pregnan-3beta,20alpha-diol monosulfate (2)	433	TRUE	3.02013	-0.2217	0.437143	-0.463909	-0.198133	-0.0510139	-0.0132304	2.89162	-1.76844	0.000309413	0.0873876	0.000532249	1.2323e-06	0.177807	0.00225314	0.068953	0.43563	0.625563	0.119224	0.30873
689	5,6-dihydrouridine	433	TRUE	-1.26704	0.204246	-0.24019	-0.0259314	0.338127	0.0185359	0.0130368	17.0525	4.10338	0.100588	0.0875193	0.0389154	0.768628	0.012591	0.228491	0.0518412	6.09346e-07	0.219249	0.528306	0.30873
487	3-hydroxyisobutyrate	433	TRUE	-0.267061	0.223809	-0.00300165	0.272606	-0.0326563	-0.0055279	0.0127407	2.0359	-3.00999	0.754049	0.0900968	0.981361	0.00511853	0.827314	0.745095	0.0853885	0.589805	0.414621	0.986869	0.316575
702	1-docosahexaenoyl-GPE (22:6)*	433	TRUE	0.241272	0.214894	0.0343029	-0.0218564	0.157798	0.0204727	-0.0444173	-0.86195	1.78846	0.768704	0.0908876	0.78149	0.815614	0.273451	0.210954	4.64375e-10	0.812551	0.614548	0.943664	0.317026
412	X - 24849	433	TRUE	-0.00463922	0.210071	0.0753739	0.447425	-0.178132	0.0103138	-0.0237397	-1.17763	-4.68357	0.995386	0.0909654	0.533072	1.0498e-06	0.206106	0.519239	0.000659833	0.740385	0.177418	0.849403	0.317026
204	1-margaroyl-2-oleoyl-GPC (17:0/18:1)*	433	TRUE	-1.57304	0.214165	0.128344	-0.127186	-0.177654	0.0470882	-0.0219846	4.59052	-1.59909	0.0546788	0.0912865	0.298318	0.173862	0.216598	0.00393328	0.00199752	0.205634	0.651813	0.746611	0.317026
799	X - 21467	433	TRUE	-0.159313	0.224473	0.125376	-0.125489	0.958943	-0.0195731	0.0318921	-5.25372	-3.8923	0.853018	0.0919702	0.33339	0.201443	2.15313e-10	0.253819	1.96772e-05	0.167867	0.295689	0.780974	0.318167
251	spermidine	433	TRUE	-0.49786	-0.224096	0.0681758	0.387785	-0.1056	-0.00104405	0.0125098	-5.94325	-2.09178	0.562547	0.0924688	0.598839	7.87548e-05	0.484319	0.951456	0.0940135	0.118684	0.574068	0.877646	0.318662
26	3-methylglutaconate	433	TRUE	0.457745	0.224033	0.221762	-0.200908	0.815887	0.00381307	-0.0276572	16.9322	5.33569	0.595195	0.0932248	0.0876869	0.041216	6.94731e-08	0.824403	0.000220121	9.15209e-06	0.152485	0.627245	0.319829
351	X - 11378	433	TRUE	-0.263088	-0.21113	-0.0537861	0.579207	0.199912	-0.00762587	0.014177	-7.24753	1.51171	0.74613	0.0935214	0.660584	4.40005e-10	0.16128	0.638034	0.0446608	0.0441037	0.667368	0.910516	0.319829
452	gluconate	433	TRUE	-1.09058	0.208715	-0.199677	-0.494887	0.00100149	0.0189194	0.0133479	5.85754	-1.7175	0.17916	0.0970046	0.102733	9.49854e-08	0.994395	0.242684	0.058455	0.103396	0.625022	0.662222	0.330315
483	1-(1-enyl-palmitoyl)-2-palmitoleoyl-GPC (P-16:0/16:1)*	433	TRUE	0.971696	0.211167	0.137094	-0.505586	-0.475433	-0.000359009	-0.0287497	10.3903	3.84536	0.237886	0.0977749	0.26926	7.62637e-08	0.00100786	0.982558	5.84137e-05	0.00438876	0.280555	0.739821	0.330315
396	linoleoylcholine*	433	TRUE	-1.03802	0.220157	-0.196463	-0.0376415	-0.42512	0.0365199	-0.0244308	1.8693	-3.10386	0.226916	0.0980589	0.129201	0.701302	0.00483419	0.033069	0.00106368	0.623303	0.403873	0.677913	0.330315
479	sphingomyelin (d18:1/22:1, d18:2/22:0, d16:1/24:1)*	433	TRUE	-2.08747	-0.211193	-0.124901	-0.280288	-0.607826	0.0431296	0.00777077	1.05723	0.772491	0.0113058	0.0980624	0.314641	0.00290791	2.6703e-05	0.00869587	0.277803	0.772134	0.828549	0.767509	0.330315
650	myo-inositol	433	TRUE	-0.170295	0.215288	-0.0289767	0.0402035	-0.0718016	0.0155614	-0.025377	3.34975	0.473488	0.839553	0.0984836	0.819213	0.675649	0.626909	0.353663	0.000515822	0.368682	0.896526	0.961265	0.330492
404	1-(1-enyl-stearoyl)-2-dihomo-linolenoyl-GPE (P-18:0/20:3)*	433	TRUE	-1.15139	0.213405	-0.0741019	0.0450961	-0.193428	0.020757	0.0021135	5.36922	2.65144	0.167887	0.0989604	0.555989	0.636357	0.187117	0.212642	0.770795	0.146625	0.463162	0.86214	0.330853
20	X - 11530	433	TRUE	-0.262341	0.207342	0.0509137	0.46013	-0.185306	0.0151835	-0.0233916	-0.312116	-4.31711	0.747353	0.100286	0.678317	7.58438e-07	0.1951	0.349957	0.000947297	0.931063	0.220702	0.912651	0.334037
285	pyroglutamylvaline	433	TRUE	-1.28705	0.213842	-0.111305	0.0657126	0.00479979	0.0133681	0.0216225	1.74674	1.16254	0.128606	0.10314	0.383281	0.497035	0.974257	0.428783	0.00330096	0.641559	0.751164	0.795359	0.341611
802	4-hydroxy-2-oxoglutaric acid	433	TRUE	0.845064	0.228055	0.0923439	-0.425989	-0.0206182	-0.0135045	0.000280183	-1.56331	2.21876	0.349744	0.103322	0.497834	3.6885e-05	0.896638	0.453776	0.971536	0.696195	0.570583	0.842397	0.341611
820	(N(1) + N(8))-acetylspermidine	433	TRUE	-1.56414	0.215429	-0.167273	0.421566	-0.126092	0.0245694	0.00578296	-0.374583	-4.06899	0.0683592	0.105136	0.195962	1.70747e-05	0.402795	0.151206	0.43801	0.921516	0.273348	0.710284	0.34633
455	perfluorooctanoate (PFOA)	433	TRUE	-2.20399	0.199202	-0.163738	0.458336	0.127854	0.0520774	-0.0173596	2.54057	-1.64177	0.00576146	0.107203	0.17356	5.00441e-07	0.361757	0.00107301	0.0123176	0.472509	0.634678	0.704927	0.351847
500	1-palmityl-2-palmitoyl-GPC (O-16:0/16:0)*	433	TRUE	2.63826	-0.21113	0.0243869	-0.0738432	-0.412653	-0.0391932	-0.0216049	4.86326	-0.488658	0.00188372	0.108378	0.848843	0.446372	0.0056394	0.0206306	0.00339815	0.195948	0.894201	0.961265	0.354403
840	N-acetylglutamine	433	TRUE	-0.259014	0.215584	-0.122711	0.0423935	-0.0252881	0.0107583	-0.00865377	11.1004	10.2961	0.766102	0.10998	0.349792	0.669961	0.868648	0.535632	0.252679	0.00400628	0.00629763	0.783621	0.358335
531	N-acetylglycine	433	TRUE	1.38794	0.195246	-0.208238	-0.362	-0.181035	0.00947992	-0.0581402	13.9203	1.96711	0.0787557	0.110413	0.0801508	5.98088e-05	0.191674	0.547208	2.34577e-17	6.89857e-05	0.564886	0.614329	0.358443
458	caprylate (8:0)	433	TRUE	0.232538	0.216255	0.229553	-0.358506	-0.0917419	0.0144458	-0.02632	-0.213462	0.843837	0.790998	0.111625	0.0826303	0.000348208	0.551609	0.409173	0.000555919	0.956208	0.824179	0.614329	0.36107
761	dihomo-linolenoyl-choline	433	TRUE	-1.56294	0.217661	-0.134336	-0.0490636	-0.302472	0.0309881	0.00232899	8.05537	-2.08612	0.0775685	0.112589	0.314208	0.627676	0.0517809	0.0793746	0.762123	0.0400428	0.586275	0.767509	0.361782
615	X - 11850	433	TRUE	0.756244	-0.220493	0.121724	-0.21147	-0.0542654	-0.00828794	-0.0102893	4.17844	8.43989	0.399294	0.112653	0.368081	0.0390939	0.73055	0.643295	0.186878	0.293159	0.0297656	0.789545	0.361782
391	palmitoyl-docosahexaenoyl-glycerol (16:0/22:6) [1]*	433	TRUE	-1.27243	0.218436	0.0573116	0.288489	0.306933	0.0145674	0.0144026	2.99229	-1.48573	0.152918	0.113221	0.669308	0.00455908	0.0496252	0.412025	0.0626085	0.448037	0.699827	0.912651	0.362308
150	1-(1-enyl-palmitoyl)-2-myristoyl-GPC (P-16:0/14:0)*	433	TRUE	2.08939	0.203553	-0.0409799	-0.249827	-0.486177	-0.0229248	-0.0303599	9.70099	10.8957	0.0120557	0.11438	0.743917	0.00859758	0.000879991	0.167305	2.68804e-05	0.00851184	0.00249046	0.936165	0.363451
492	N,N,N-trimethyl-5-aminovalerate	433	TRUE	-2.57527	0.203054	-0.19063	0.00733024	0.315343	0.0410143	0.0184556	-0.204762	1.31689	0.00192317	0.11439	0.127684	0.938396	0.03056	0.0132648	0.010516	0.955605	0.714036	0.677913	0.363451
70	N-palmitoyl-sphinganine (d18:0/16:0)	433	TRUE	-1.81248	0.211548	0.00864739	0.144078	-0.0669739	0.0166289	0.0342688	-2.32812	-7.87079	0.0363838	0.114879	0.94719	0.145357	0.65972	0.335801	5.27376e-06	0.544032	0.0357839	0.98583	0.363655
461	1-(1-enyl-palmitoyl)-GPC (P-16:0)*	433	TRUE	0.0723076	0.19659	-0.13971	0.320961	-0.267399	0.0185773	-0.0389196	4.18647	0.236236	0.928554	0.115572	0.250404	0.000494028	0.059014	0.248139	2.78415e-08	0.241274	0.946043	0.731074	0.363655
132	2-arachidonoyl-GPC (20:4)*	433	TRUE	-1.27453	0.21246	0.177579	0.360088	0.137345	0.0247968	-0.00931008	15.917	6.84814	0.143738	0.115672	0.176564	0.000299519	0.369667	0.153873	0.219028	3.76748e-05	0.0695546	0.704927	0.363655
694	lactosyl-N-nervonoyl-sphingosine (d18:1/24:1)*	433	TRUE	1.76956	-0.192522	-0.0267615	-0.207293	-0.526888	-0.00809738	-0.0422996	10.7064	0.301371	0.0253082	0.116226	0.822438	0.0218169	0.000149368	0.607883	7.58557e-10	0.00225373	0.929875	0.961265	0.364121
325	X - 11847	433	TRUE	0.671924	0.206967	-0.0158936	0.187556	-0.193499	-0.00451535	-0.0177034	-9.59825	-8.26845	0.431858	0.118086	0.901832	0.054787	0.197433	0.791161	0.0171502	0.0112638	0.0254459	0.973544	0.368658
431	X - 23644	433	TRUE	-1.47494	0.209146	-0.124892	0.293366	0.000477053	0.0370068	-0.0162103	3.9926	-3.15126	0.0896164	0.120251	0.34031	0.00312295	0.997506	0.0327538	0.0317876	0.299664	0.402125	0.780974	0.374087
338	stearoylcholine*	433	TRUE	-1.21009	0.211142	-0.235452	0.0429253	-0.254	0.0343561	-0.0164097	3.87188	-2.40947	0.168283	0.120711	0.0753241	0.66879	0.0996214	0.0498807	0.0315343	0.319711	0.526233	0.614329	0.374087
15	hydroxyasparagine**	433	TRUE	-3.41729	0.167809	-0.168298	-0.122353	0.206251	0.0355201	0.0601625	5.99635	2.87573	1.00513e-06	0.121077	0.110058	0.125327	0.0928083	0.0108201	3.78725e-23	0.0527382	0.341707	0.668546	0.374087
630	pregnenolone sulfate	433	TRUE	2.28556	-0.180042	0.324179	0.493151	-0.0879985	-0.0435714	-0.0170512	2.05374	0.869112	0.00254802	0.124923	0.00451802	1.20203e-08	0.508253	0.00392724	0.00957064	0.540508	0.790938	0.406376	0.384631
567	1-stearoyl-2-adrenoyl-GPC (18:0/22:4)*	433	TRUE	-1.43126	0.198614	0.145173	0.0329288	0.0124936	0.00336261	0.043888	7.54758	-0.0343568	0.0870738	0.125349	0.249571	0.730402	0.932224	0.840285	1.55589e-09	0.0416832	0.992429	0.731074	0.384631
690	1-stearoyl-GPC (18:0)	433	TRUE	-0.523317	0.188392	-0.204594	0.330357	-0.276003	0.0265379	-0.03022	4.7266	-3.95772	0.510487	0.126198	0.0878459	0.000276378	0.04812	0.0943246	1.22161e-05	0.179714	0.250234	0.627245	0.385915
717	1-palmitoyl-GPI (16:0)	433	TRUE	-2.587	0.214653	0.0903333	-0.161709	-0.407323	0.0466166	0.0115742	6.34594	2.90492	0.00449687	0.128089	0.510444	0.120057	0.0108625	0.0102736	0.143498	0.115703	0.46112	0.842397	0.388751
286	glycine	433	TRUE	-0.219051	0.189627	-0.109844	-0.544677	-0.0381739	0.0310947	-0.0386529	10.1007	4.43324	0.785427	0.128166	0.36508	3.10633e-09	0.787037	0.0526884	3.21986e-08	0.00460131	0.203042	0.789545	0.388751
879	X - 13866	433	TRUE	-0.77715	0.205248	-0.0898821	0.132123	-0.0485435	0.0374553	-0.037185	-3.30964	3.91951	0.37251	0.128427	0.49381	0.184461	0.751103	0.0311856	9.06542e-07	0.391308	0.298775	0.842397	0.388751
320	taurine	433	TRUE	-0.983736	-0.200456	0.170335	-0.223055	-0.12183	0.0217008	-0.00269839	5.3813	-1.93961	0.249383	0.129744	0.185777	0.0222423	0.416637	0.202723	0.716133	0.154953	0.59981	0.708224	0.391416
517	1-(1-enyl-stearoyl)-2-docosahexaenoyl-GPE (P-18:0/22:6)*	433	TRUE	0.870413	0.186842	-0.189204	0.094077	0.035274	0.0108616	-0.0521142	-10.7939	3.47492	0.277185	0.132133	0.117093	0.303898	0.802002	0.496629	6.99214e-14	0.00235221	0.316228	0.677913	0.397285
348	N2,N2-dimethylguanosine	433	TRUE	-1.69008	0.183106	-0.15972	0.115375	0.224235	0.00911587	0.0411805	3.20771	6.19086	0.0319502	0.133574	0.178666	0.199906	0.105118	0.5619	1.79524e-09	0.358119	0.0694863	0.705221	0.399827
109	behenoylcarnitine (C22)*	433	TRUE	-1.65501	0.192573	-0.0210261	0.359515	-0.282083	0.0365283	-0.00729216	-2.57545	-7.89022	0.0460444	0.134018	0.866467	0.000148532	0.052847	0.0272838	0.3117	0.483458	0.0280008	0.963954	0.399827
635	ursodeoxycholate	433	TRUE	-0.0804983	0.191262	-0.112383	0.134742	0.207788	-0.0159115	0.0236664	-5.54078	-8.57996	0.922309	0.134713	0.366372	0.153016	0.151734	0.333841	0.000967136	0.12972	0.0163307	0.789545	0.399827
124	thyroxine	433	TRUE	-0.693715	-0.192565	0.187564	-0.388959	-0.150308	0.00307251	0.024608	1.05574	-1.43515	0.403913	0.134763	0.13435	4.19418e-05	0.303123	0.852973	0.000655513	0.774329	0.689956	0.682803	0.399827
114	X - 19438	433	TRUE	-0.405544	0.201744	0.163542	0.514869	0.144156	-0.00985922	0.0213396	6.30702	-6.63287	0.643101	0.136758	0.21509	2.61096e-07	0.348305	0.57225	0.00501338	0.103819	0.079974	0.720701	0.404407
157	1-dihomo-linolenoyl-GPE (20:3n3 or 6)*	433	TRUE	-1.89507	0.196884	0.19653	-0.0379134	0.0890009	0.0231624	0.0229299	14.655	-0.792917	0.0270385	0.138135	0.128215	0.698609	0.554348	0.175498	0.00207753	0.000113697	0.830767	0.677913	0.406005
260	1-stearoyl-2-linoleoyl-GPC (18:0/18:2)*	433	TRUE	-2.09845	0.189674	-0.158786	-0.165455	-0.694396	0.0547767	-0.0134579	-3.62293	-7.8135	0.011058	0.138205	0.202122	0.079487	1.68792e-06	0.00088403	0.0607336	0.322085	0.0288395	0.717735	0.406005
547	1-methyl-5-imidazoleacetate	433	TRUE	0.594332	0.188976	0.0205605	0.502483	0.331606	-0.0124503	-0.00887563	12.8884	8.58839	0.471645	0.139566	0.868785	9.97763e-08	0.0222052	0.449688	0.216029	0.000426105	0.0162611	0.963954	0.408664
154	bilirubin (E,E)*	433	TRUE	0.621154	0.197364	0.169978	0.452986	-0.1837	-0.00571414	-0.0202719	6.43862	-2.92696	0.472229	0.140371	0.19187	4.45456e-06	0.226071	0.740249	0.00693194	0.0925819	0.433886	0.708224	0.409682
388	X - 15666	433	TRUE	0.159257	0.192655	-0.0567123	-0.00295824	-0.166659	0.00845681	-0.0235163	4.03937	8.92608	0.851526	0.143851	0.658348	0.975721	0.264716	0.618293	0.00146817	0.283907	0.0153682	0.910309	0.417212
383	epiandrosterone sulfate	433	TRUE	1.49349	0.17925	-0.207331	0.808882	0.155107	-0.0210891	-0.0278771	0.274334	-6.81326	0.0592431	0.143882	0.0823245	3.77559e-19	0.264618	0.181752	5.06864e-05	0.937658	0.0467994	0.614329	0.417212
823	isoursodeoxycholate	433	TRUE	0.581242	0.183579	-0.120661	0.0483693	0.260618	-0.029853	0.026119	-8.04049	-11.006	0.474198	0.144539	0.324312	0.602139	0.0676699	0.0653687	0.00021453	0.0254408	0.001744	0.776962	0.417764
145	ascorbic acid 3-sulfate*	433	TRUE	-2.11386	0.189555	-0.195364	-0.00313734	-0.00447012	0.0610197	-0.0317468	10.1423	3.2177	0.0118833	0.145349	0.12297	0.973928	0.975835	0.000272168	1.37285e-05	0.0064415	0.376351	0.677913	0.418754
72	isovalerylcarnitine (C5)	433	TRUE	-2.54695	0.186673	-0.303716	0.64613	0.358617	0.0331033	0.0220182	-2.18056	-6.28363	0.00239695	0.150886	0.0163108	1.56115e-11	0.0149269	0.0479013	0.0025217	0.557393	0.0835518	0.43441	0.43267
115	1-(1-enyl-palmitoyl)-2-arachidonoyl-GPC (P-16:0/20:4)*	433	TRUE	0.620517	0.198034	0.0867163	0.239729	0.0336733	-0.0169808	0.000859661	6.27338	3.03585	0.485926	0.151145	0.51826	0.0184493	0.829524	0.339098	0.911535	0.111807	0.430944	0.846475	0.43267
719	palmitoyl-oleoyl-glycerol (16:0/18:1) [1]*	433	TRUE	-1.39318	0.191188	-0.0448034	0.357492	0.317872	0.00216378	0.0421731	4.95812	-8.32734	0.106537	0.152796	0.730589	0.000288697	0.0360085	0.899997	1.8779e-08	0.194802	0.0258355	0.927207	0.436004
625	2-hydroxyhippurate (salicylurate)	433	TRUE	-1.43318	0.175352	0.0353421	0.0892088	0.417167	0.0296516	-0.00563741	5.1098	1.02496	0.0706198	0.153321	0.767399	0.324584	0.00273088	0.0607659	0.413093	0.145677	0.765164	0.94033	0.436113
30	1-myristoyl-2-docosahexaenoyl-GPC (14:0/22:6)*	433	TRUE	-0.285453	0.192132	0.145139	-0.251732	-0.0199727	0.0201891	-0.0218995	2.25966	-1.14401	0.743549	0.155188	0.269776	0.0115534	0.896295	0.246047	0.00386881	0.558835	0.76196	0.739821	0.440027
651	5alpha-pregnan-3beta,20alpha-diol disulfate	433	TRUE	2.51904	-0.181086	0.413904	-0.520948	-0.113936	-0.0467099	-0.00129334	-2.00215	-4.34629	0.00222987	0.155916	0.000858416	3.10472e-08	0.430979	0.00447624	0.856614	0.583294	0.222906	0.153828	0.440627
737	1-stearoyl-2-arachidonoyl-GPC (18:0/20:4)	433	TRUE	-1.52706	0.189514	0.102167	-0.0662614	0.292336	0.0159404	0.025034	9.69592	1.85836	0.0768566	0.156383	0.432282	0.50158	0.0537837	0.354519	0.000843575	0.0112242	0.618901	0.810653	0.440627
163	X - 11787	433	TRUE	-2.15674	0.198004	-0.232239	0.446684	0.0535729	0.0429149	-0.00383286	-3.13813	1.14672	0.0173985	0.158722	0.0893301	1.62107e-05	0.73659	0.0176763	0.62667	0.43476	0.770195	0.627245	0.445815
14	1-palmitoyl-2-docosahexaenoyl-GPE (16:0/22:6)*	433	TRUE	0.793308	0.193606	-0.119909	-0.233348	0.397738	0.00392238	-0.0311866	-1.10421	0.571266	0.374761	0.162026	0.373435	0.0222896	0.011279	0.825865	5.92301e-05	0.780347	0.88261	0.791012	0.453169
724	dimethylarginine (SDMA + ADMA)	433	TRUE	-1.78652	0.176879	-0.0621443	0.215722	0.0210482	0.0363184	-0.00214104	7.53176	-3.74694	0.0288037	0.162352	0.613901	0.0208458	0.883399	0.0258785	0.763005	0.03749	0.289474	0.878823	0.453169
56	X - 23782	433	TRUE	0.112888	0.170375	0.0575221	-0.388741	-0.316635	0.0151083	-0.0272546	-3.86983	-1.33591	0.886248	0.163413	0.628674	1.61651e-05	0.022328	0.337151	7.03957e-05	0.26833	0.695727	0.892491	0.45342
628	lignoceroylcarnitine (C24)*	433	TRUE	-2.0718	0.18091	0.047667	0.483118	-0.140712	0.0435132	-0.00666792	-2.97829	-8.40028	0.0134253	0.163454	0.705901	4.49965e-07	0.339015	0.00923834	0.359793	0.422428	0.020569	0.922678	0.45342
863	glutamine conjugate of C6H10O2 (1)*	433	TRUE	-1.32138	0.185651	-0.0979476	-0.0129803	-0.24349	0.0292067	-0.00190574	-0.393817	2.32056	0.125945	0.165175	0.451721	0.89531	0.108348	0.0899447	0.799489	0.918005	0.53469	0.826503	0.454746
244	N4-acetylcytidine	433	TRUE	-0.190934	0.179558	-0.131955	-0.00016128	0.491087	-0.0132393	0.0309304	17.2664	1.10989	0.819505	0.165993	0.295464	0.998654	0.0008323	0.427664	2.09746e-05	3.19746e-06	0.759276	0.746611	0.454746
556	aspartate	433	TRUE	-2.47166	0.169365	0.166499	0.366775	0.101363	0.0216354	0.0451919	2.37906	-7.5747	0.00174457	0.166132	0.161787	4.77189e-05	0.46475	0.169505	4.46505e-11	0.496399	0.02666	0.703603	0.454746
623	tetradecadienedioate (C14:2-DC)*	433	TRUE	-2.63406	0.177014	0.0382083	-0.199596	-0.324693	0.0435362	0.0212718	6.961	-5.34189	0.0014678	0.167617	0.759516	0.0348629	0.0255675	0.00839523	0.00311145	0.0577641	0.136134	0.938722	0.454746
55	quinolinate	433	TRUE	-1.77653	0.175604	-0.0523311	0.0718041	0.0666695	0.00531903	0.0504631	13.0405	-0.100821	0.0306023	0.167697	0.672623	0.444274	0.644054	0.745525	1.56431e-12	0.000340262	0.977384	0.912651	0.454746
416	5alpha-androstan-3alpha,17beta-diol monosulfate (1)	433	TRUE	1.12998	0.16978	-0.215196	0.669001	0.357136	-0.0325608	0.00614183	-5.34111	-8.77613	0.154981	0.16779	0.072362	1.70127e-13	0.0104852	0.0399337	0.373658	0.129182	0.0107184	0.614329	0.454746
73	ergothioneine	433	TRUE	0.340874	0.167875	-0.0230183	0.21464	-0.0232307	0.0137471	-0.0371892	-9.17345	-1.03766	0.664944	0.168561	0.846156	0.0169774	0.866531	0.381231	5.38479e-08	0.00851717	0.760685	0.961265	0.454746
797	indolepropionate	433	TRUE	0.0632375	-0.162214	0.0926542	-0.0786803	-0.0767177	0.0264011	-0.044182	-5.56359	4.68049	0.933816	0.1691	0.419531	0.365749	0.566191	0.0821886	2.42774e-11	0.0991115	0.155608	0.807886	0.454746
197	X - 24295	433	TRUE	0.0223987	0.183897	0.0802959	0.467122	0.175021	-0.0115336	0.0113813	3.39694	-5.45645	0.979316	0.169423	0.53749	2.21178e-06	0.248679	0.503318	0.129468	0.374793	0.144532	0.850867	0.454746
352	X - 11315	433	TRUE	0.0748555	0.169947	-0.043033	0.0867315	-0.155896	0.0311024	-0.0568869	3.04548	1.10605	0.925457	0.170314	0.72121	0.342647	0.267199	0.0513055	2.76026e-16	0.390215	0.749436	0.923804	0.454746
378	taurocholenate sulfate*	433	TRUE	-0.321736	-0.182109	0.0948206	-0.000694359	-0.00330263	0.006699	0.000960484	6.2162	3.37715	0.707528	0.170435	0.463216	0.994345	0.982504	0.695337	0.897433	0.101799	0.362929	0.833416	0.454746
812	mannitol/sorbitol	433	TRUE	-0.847241	0.169818	-0.0880571	0.220324	0.161051	0.0108631	0.0075876	4.74105	8.31155	0.289955	0.170943	0.465589	0.0160012	0.25204	0.496371	0.275395	0.181339	0.0164701	0.835391	0.454746
755	1-pentadecanoyl-GPC (15:0)*	433	TRUE	-0.505113	0.172408	0.112967	0.241372	-0.359333	0.0223264	-0.0227651	10.0119	-2.8257	0.534558	0.171186	0.35679	0.00937993	0.0118772	0.168756	0.00127524	0.00545839	0.422173	0.789545	0.454746
3	orotate	433	TRUE	-0.878386	0.190426	0.113188	0.142407	-0.245324	0.0172495	0.00143507	11.4853	-5.11288	0.328337	0.171347	0.403364	0.165384	0.12007	0.335896	0.854175	0.00391511	0.188699	0.801319	0.454746
408	X - 23739	433	TRUE	-0.421636	0.165403	-0.0595097	0.427775	-0.0621763	0.0142455	-0.0148641	2.798	4.11689	0.589449	0.171779	0.613351	1.64702e-06	0.650462	0.360702	0.0285619	0.418908	0.2235	0.878823	0.454746
172	gamma-glutamylphenylalanine	433	TRUE	-1.8387	0.157524	-0.140511	0.623955	0.101213	0.00667098	0.0430452	1.24833	-0.498923	0.0135337	0.172052	0.210587	2.21124e-13	0.438927	0.653324	2.86315e-11	0.705112	0.876979	0.720701	0.454746
817	benzoate	433	TRUE	0.850636	-0.182514	0.0198261	-0.265573	0.121303	-0.0223575	0.00762091	8.5054	0.64251	0.32565	0.173396	0.879198	0.00722639	0.424798	0.195274	0.310826	0.0265279	0.863817	0.966885	0.456368
499	1-adrenoyl-GPC (22:4)*	433	TRUE	-1.1708	0.180015	-0.0103748	0.185184	-0.210592	0.00875777	0.0219348	5.7607	1.11098	0.170459	0.173685	0.935773	0.0577177	0.160346	0.607236	0.00312075	0.127919	0.763803	0.9841	0.456368
739	sphingomyelin (d18:1/17:0, d17:1/18:0, d19:1/16:0)	433	TRUE	-0.801712	-0.172285	-0.0454612	-0.0145751	-0.318584	0.0119434	0.0120915	-1.6665	1.46176	0.328713	0.175454	0.713293	0.87648	0.0271029	0.465727	0.0900016	0.646755	0.680769	0.922678	0.458731
44	maltotriose	433	TRUE	-1.61014	-0.1761	0.170933	-0.133616	-0.0391679	0.0181525	0.0229181	-1.74365	-6.92719	0.0550574	0.175608	0.176649	0.163452	0.790448	0.278248	0.00167409	0.639117	0.0565525	0.704927	0.458731
512	3-methyl-2-oxovalerate	433	TRUE	-0.0168864	0.165921	0.124236	0.954024	0.21523	-0.0211049	0.0188441	2.83103	-6.08183	0.983025	0.177182	0.299043	6.82925e-26	0.122552	0.182499	0.0062839	0.420735	0.0766749	0.746611	0.460215
362	glutarate (C5-DC)	433	TRUE	-0.425759	0.182097	-0.13686	0.123646	0.108199	0.00347409	0.00610739	-16.5194	-2.97885	0.625009	0.177203	0.297256	0.214047	0.479397	0.841529	0.419711	1.86403e-05	0.429513	0.746611	0.460215
59	1-margaroyl-GPC (17:0)	433	TRUE	-0.0972661	0.16291	-0.040911	0.283022	-0.208309	0.0245474	-0.0426129	5.87568	-3.46865	0.900967	0.178496	0.728409	0.00152656	0.129138	0.115389	3.50782e-10	0.0897368	0.305262	0.926088	0.460617
805	proline	433	TRUE	-0.717866	0.182349	-0.0698175	0.531407	0.568522	-0.0130814	0.0380473	-0.868016	2.85576	0.412264	0.178811	0.59678	1.07835e-07	0.000217788	0.45384	5.69213e-07	0.822927	0.451127	0.877646	0.460617
762	cysteine	433	TRUE	-0.354001	-0.178467	-0.0737687	0.128646	0.173759	0.0179475	-0.0200931	4.26961	-3.24197	0.679581	0.1789	0.567986	0.188877	0.248336	0.29381	0.00697208	0.260818	0.382187	0.86214	0.460617
641	7-alpha-hydroxy-3-oxo-4-cholestenoate (7-Hoca)	433	TRUE	-1.75592	0.179107	0.0859333	0.373582	-0.165561	0.0104925	0.0362547	1.62513	-2.84152	0.0419052	0.180386	0.508904	0.00015129	0.274714	0.54222	1.33493e-06	0.670824	0.4469	0.842397	0.461809
303	3-methyl-2-oxobutyrate	433	TRUE	-0.401555	0.175738	-0.100457	0.526576	0.12389	-0.0110862	0.0239033	4.29166	-5.2519	0.635384	0.180394	0.431298	5.24243e-08	0.404844	0.51165	0.00116022	0.252674	0.151944	0.810653	0.461809
809	1-(1-enyl-palmitoyl)-2-oleoyl-GPC (P-16:0/18:1)*	433	TRUE	1.80063	0.153376	0.00431133	-0.432907	-0.41938	0.0104857	-0.0744725	5.93371	3.99322	0.0150682	0.181375	0.9692	3.12763e-07	0.00126562	0.477933	5.81674e-31	0.070597	0.212999	0.986869	0.461827
639	gamma-glutamylcitrulline*	433	TRUE	-0.64469	-0.158313	-0.107718	0.106484	-0.331497	0.0230334	-0.0165045	5.94485	1.54274	0.399204	0.181432	0.350044	0.222882	0.0135738	0.131044	0.0129937	0.079304	0.641168	0.783621	0.461827
644	2-hydroxybutyrate/2-hydroxyisobutyrate	433	TRUE	-0.98298	0.175499	0.020654	0.255889	0.141742	0.00140516	0.0272494	4.39569	-8.5613	0.247546	0.182642	0.871944	0.00841445	0.342401	0.933957	0.000224941	0.243139	0.019983	0.963954	0.462686
816	ceramide (d18:1/20:0, d16:1/22:0, d20:1/18:0)*	433	TRUE	-2.26561	0.182925	-0.129809	0.142853	0.026518	0.0325058	0.0218532	3.05248	-5.43703	0.0105875	0.182802	0.331257	0.158314	0.864733	0.0659904	0.00454685	0.436964	0.156455	0.780974	0.462686
725	1-linoleoyl-2-linolenoyl-GPC (18:2/18:3)*	433	TRUE	0.59459	0.171507	0.0385751	-0.0552998	-0.381595	0.0127923	-0.0426907	-3.05625	-0.324606	0.475093	0.183569	0.758533	0.560929	0.00905391	0.441101	3.59516e-09	0.4073	0.928224	0.938722	0.463318
146	7-methylguanine	433	TRUE	-0.951114	0.168289	-0.0399173	0.321622	0.123329	0.0114564	0.0103608	-2.87379	-3.50689	0.247821	0.186848	0.747622	0.000624361	0.393505	0.485267	0.147373	0.430593	0.324914	0.938193	0.470268
228	4-chlorobenzoic acid	433	TRUE	-0.468147	0.185093	0.180477	0.034826	-0.097276	0.0111455	-0.00281874	1.23982	2.57506	0.60654	0.1887	0.187765	0.737342	0.542285	0.538756	0.721173	0.758178	0.512813	0.708224	0.473601
90	X - 16946	433	TRUE	-0.260652	0.167	0.0416327	0.452336	-0.13967	0.0122891	-0.0185533	-0.180932	-2.91258	0.75104	0.189464	0.736721	1.4383e-06	0.333021	0.453313	0.00934635	0.960353	0.41277	0.932804	0.47419
469	hydroxy-N6,N6,N6-trimethyllysine*	433	TRUE	-3.7782	0.168261	-0.193958	0.48514	0.31378	0.0649055	0.0102005	0.927892	4.93541	5.20934e-06	0.190262	0.120725	3.03642e-07	0.0311927	8.71308e-05	0.156858	0.800599	0.169139	0.677913	0.474328
849	sulfate*	433	TRUE	0.561478	0.177807	-0.298621	-0.288256	0.0726536	-0.021172	0.0263025	7.24708	1.88453	0.522662	0.191298	0.0240986	0.00406885	0.637641	0.226885	0.000567978	0.0625473	0.620124	0.44604	0.474328
473	9,10-DiHOME	433	TRUE	1.03442	-0.181792	-0.0574091	-0.0964933	0.0555209	-0.0104538	-0.0167669	-5.05569	-1.24546	0.249514	0.191433	0.671574	0.347069	0.724887	0.559619	0.0316992	0.203952	0.748736	0.912651	0.474328
355	1-(1-enyl-stearoyl)-2-oleoyl-GPC (P-18:0/18:1)	433	TRUE	-0.508064	0.152033	0.0239643	-0.290745	-0.545988	0.0498614	-0.0613449	4.24315	3.19025	0.49911	0.191694	0.832494	0.000709808	3.53593e-05	0.000882965	5.86423e-21	0.202612	0.326848	0.961265	0.474328
783	linoleoyl-linoleoyl-glycerol (18:2/18:2) [1]*	433	TRUE	0.0586253	-0.158395	-0.185209	0.399802	0.289238	-0.0206874	0.0299575	-6.75845	-12.9659	0.940445	0.192574	0.117381	8.19886e-06	0.0358311	0.186279	1.11379e-05	0.0518851	0.000134929	0.677913	0.474328
47	1-(1-enyl-oleoyl)-GPC (P-18:1)*	433	TRUE	-0.246828	0.174603	-0.180327	0.103239	-0.298824	0.0199721	-0.0271484	0.308859	-3.83459	0.775435	0.192696	0.166762	0.296267	0.0492326	0.24719	0.000304797	0.93578	0.3059	0.704927	0.474328
566	arachidate (20:0)	433	TRUE	-0.372256	0.159147	0.23601	0.138956	-0.436067	0.026554	-0.0358365	7.97658	0.249188	0.637398	0.193338	0.0474207	0.12353	0.00166696	0.0918819	1.7676e-07	0.0226243	0.941893	0.531112	0.474408
349	4-hydroxyphenylpyruvate	433	TRUE	-1.63089	0.176379	-0.0678678	-0.141933	0.253912	0.00246707	0.0515515	3.84085	7.10235	0.0629789	0.194272	0.607723	0.156642	0.0992852	0.887866	1.34054e-11	0.322955	0.0613935	0.878823	0.474408
161	5-methylthioadenosine (MTA)	433	TRUE	-2.05024	0.167442	-0.118155	0.0625946	0.168475	0.0245628	0.0247198	9.05583	-1.80515	0.0138185	0.194317	0.34656	0.510566	0.249339	0.139228	0.000634724	0.0141055	0.616527	0.783621	0.474408
266	X - 11444	433	TRUE	-1.35088	-0.150532	-0.144221	0.80745	0.142143	0.00687267	0.0260395	6.0229	-2.1927	0.0735863	0.1981	0.205067	7.87083e-21	0.283724	0.64815	7.20952e-05	0.0717672	0.502268	0.717735	0.48233
406	choline	433	TRUE	-1.48469	0.159847	-0.0858068	0.385909	-0.0263664	0.00961976	0.0305313	-1.47535	-5.46216	0.0648469	0.199433	0.478991	2.65865e-05	0.851894	0.548688	1.24389e-05	0.678778	0.11659	0.838218	0.482469
789	ceramide (d18:2/24:1, d18:1/24:2)*	433	TRUE	-1.59802	0.179113	-0.229525	0.0404857	-0.0929754	0.0248333	0.0128635	1.17274	-7.99163	0.0766684	0.200231	0.0916106	0.694604	0.557534	0.167828	0.100979	0.769323	0.0408188	0.627245	0.482469
89	tetradecadienoate (14:2)*	433	TRUE	-0.184868	-0.167521	0.132196	-0.34648	-0.0987727	0.00693342	-0.000370645	-4.52121	-0.945498	0.826762	0.200478	0.299144	0.000329971	0.505521	0.68071	0.959723	0.226985	0.79595	0.746611	0.482469
287	nicotinamide	433	TRUE	-0.0877619	-0.162787	0.328316	0.16625	0.14387	-0.00725357	0.0117299	-1.77797	-6.81061	0.914902	0.200734	0.00799934	0.0764041	0.318537	0.657937	0.100229	0.625089	0.0553941	0.406376	0.482469
336	p-cresol sulfate	433	TRUE	0.26033	-0.156623	0.143176	-0.0977192	0.0232332	0.0115211	-0.026434	7.62183	4.72394	0.742332	0.201669	0.230301	0.280025	0.867315	0.465745	0.000122	0.0298048	0.16813	0.730571	0.482469
281	phosphatidylcholine (18:0/20:2, 20:0/18:2)*	433	TRUE	-1.63585	0.170213	0.0113637	-0.288698	-0.441702	0.0427499	-0.0104071	-1.83288	-4.59992	0.0575469	0.202098	0.930255	0.00334748	0.00350137	0.0128429	0.164365	0.631008	0.217304	0.982346	0.482469
767	3-phenylpropionate (hydrocinnamate)	433	TRUE	0.388044	-0.159026	0.183525	0.0251581	-0.233721	0.0234655	-0.0517186	8.97754	9.19381	0.629727	0.202174	0.130353	0.784385	0.0982391	0.143864	1.41147e-13	0.011814	0.00831827	0.677913	0.482469
459	3-amino-2-piperidone	433	TRUE	-1.6487	0.159662	-0.312929	0.568877	0.062133	0.022438	0.0139087	12.4728	3.40293	0.0414622	0.202465	0.0102467	7.35674e-10	0.661732	0.164199	0.0477483	0.000498318	0.330945	0.423324	0.482469
366	cortisol	433	TRUE	0.165618	0.164012	0.0685355	-0.253976	0.186348	0.0191432	-0.0371506	13.4125	0.581436	0.842325	0.203511	0.584988	0.00757965	0.202502	0.249045	2.81493e-07	0.000276652	0.871829	0.872128	0.483676
62	glycodeoxycholate	433	TRUE	0.473041	0.173001	-0.0196194	0.0662219	0.187663	-0.0143829	0.00361923	3.88968	0.314358	0.590651	0.204136	0.882338	0.509798	0.224338	0.412269	0.635752	0.318108	0.934185	0.966885	0.483878
626	ximenoylcarnitine (C26:1)*	433	TRUE	-2.22025	0.163616	0.176681	0.723839	-0.317514	0.0464563	-0.00870798	-1.99559	-9.8166	0.00779137	0.205574	0.160068	3.10241e-14	0.0302453	0.00524983	0.229692	0.58929	0.00656663	0.703603	0.486001
770	erucate (22:1n9)	433	TRUE	-0.680159	0.16011	0.229173	0.144912	-0.440351	0.0335749	-0.0359	3.62208	-2.43316	0.406802	0.207482	0.0636945	0.121842	0.00222749	0.0400863	4.67548e-07	0.318698	0.492984	0.586304	0.489221
196	X - 11858	433	TRUE	0.544654	0.171045	0.0253527	0.0107899	-0.177223	-2.60905e-06	-0.01883	-8.57506	-4.03451	0.538272	0.212177	0.849267	0.915008	0.254177	0.999882	0.0143347	0.0287359	0.292256	0.961265	0.497759
554	betaine	433	TRUE	-1.86252	0.162132	-0.0822149	0.653602	0.108806	0.0301939	0.00114327	-8.13376	-5.34636	0.0264233	0.21224	0.515623	9.14931e-12	0.460244	0.0712048	0.875379	0.0286493	0.140979	0.84615	0.497759
722	iminodiacetate (IDA)	433	TRUE	0.427531	-0.17003	-0.149855	0.173732	0.109801	-0.0118504	0.000376771	-4.66882	3.43547	0.627434	0.21277	0.25906	0.0842729	0.47785	0.500044	0.960739	0.231558	0.36759	0.731074	0.497759
134	X - 23587	433	TRUE	0.568622	0.159935	-0.3557	0.18956	0.162738	-0.00675108	-0.0101687	-5.63503	9.86328	0.493757	0.214046	0.00451012	0.0458214	0.264747	0.683766	0.158983	0.125816	0.00609919	0.406376	0.497922
559	methionine	433	TRUE	-0.154122	0.16709	0.13557	0.59395	0.276172	-0.00749763	0.00649478	-1.66146	0.257549	0.859232	0.214547	0.300681	2.19293e-09	0.0703609	0.665358	0.389705	0.666066	0.945413	0.748361	0.497922
214	N-acetylarginine	433	TRUE	-0.735532	0.160319	-0.250567	0.136927	0.168135	0.0123245	0.0046886	10.4567	6.7266	0.378549	0.21536	0.0465751	0.1513	0.251723	0.459485	0.518265	0.00471715	0.0628227	0.531112	0.497922
885	hexadecenedioate (C16:1-DC)*	433	TRUE	-0.405042	0.164135	0.139042	0.122403	-0.192638	0.00675184	0.00021442	-0.488981	-0.0199416	0.635928	0.215594	0.28098	0.210463	0.199833	0.692392	0.97699	0.897357	0.995704	0.742648	0.497922
173	1-stearoyl-2-docosahexaenoyl-GPC (18:0/22:6)	433	TRUE	-0.399874	-0.168828	-0.06002	-0.0127186	0.320642	0.0198485	-0.0190673	-5.23697	4.07741	0.649675	0.21575	0.651051	0.899366	0.0380897	0.25836	0.0126782	0.179358	0.284625	0.906818	0.497922
87	3-hydroxy-2-ethylpropionate	433	TRUE	-1.03981	0.163627	0.100805	0.438879	0.166642	0.017521	-0.000902143	18.8585	3.03627	0.223402	0.216174	0.43358	6.84687e-06	0.266542	0.303714	0.903236	6.21777e-07	0.411452	0.810653	0.497922
780	pyridoxal	433	TRUE	-1.41805	-0.175798	-0.346784	0.122566	0.0657078	0.0215957	0.00941435	-0.542729	3.73963	0.125007	0.21957	0.0128124	0.245766	0.685649	0.241502	0.241129	0.894565	0.349973	0.423324	0.502573
815	vanillylmandelate (VMA)	433	TRUE	-1.03819	0.140886	-0.107218	-0.157601	0.0557022	0.0231699	0.000865992	2.92002	0.352367	0.161684	0.220242	0.337652	0.0629425	0.668989	0.117413	0.893128	0.374301	0.912623	0.780974	0.502573
319	N-stearoyl-sphinganine (d18:0/18:0)*	433	TRUE	-1.77779	-0.152211	-0.0598316	-0.0514647	0.230293	0.000885081	0.0627949	2.11417	-6.90897	0.0265573	0.220267	0.620444	0.574087	0.101841	0.955854	1.94203e-19	0.551598	0.0464443	0.885891	0.502573
233	alanine	433	TRUE	-1.09828	0.156204	0.0371074	0.214578	0.318171	-0.00510116	0.0427936	1.03503	1.1202	0.181976	0.220437	0.764807	0.0224507	0.0276874	0.755966	2.15963e-09	0.776473	0.75314	0.938722	0.502573
119	isoleucylglycine	433	TRUE	-1.83697	0.160934	0.0603898	-0.0320041	0.202806	0.0460345	-0.0185412	3.85791	-3.10487	0.031671	0.224345	0.639357	0.743163	0.176801	0.0069494	0.0125654	0.308436	0.401492	0.900729	0.50913
529	palmitoyl sphingomyelin (d18:1/16:0)	433	TRUE	-0.716358	-0.156544	-0.22605	0.0202205	-0.68816	0.0308148	-0.0212307	-4.03643	0.276232	0.3894	0.224693	0.071564	0.831586	2.50086e-06	0.0634377	0.00332669	0.273649	0.938882	0.614329	0.50913
218	cortisone	433	TRUE	0.997932	0.156012	0.170339	0.147043	0.0798111	0.00668732	-0.0481811	6.60507	0.289611	0.229556	0.225314	0.173638	0.121209	0.584269	0.686477	2.44918e-11	0.0726477	0.935795	0.704927	0.50913
200	fructose	433	TRUE	-0.402644	0.171695	-0.037558	-0.0769354	0.115145	0.00334156	0.00467138	1.37138	-2.27477	0.659762	0.225585	0.785285	0.46152	0.473453	0.85467	0.556643	0.73502	0.565563	0.943664	0.50913
606	deoxycholic acid glucuronide	433	TRUE	-0.618383	0.158618	0.00348272	0.276482	-0.150153	-0.00247177	0.0198524	11.5337	1.52602	0.467122	0.228577	0.978324	0.00442756	0.314703	0.884146	0.00721446	0.00220298	0.678458	0.986869	0.511597
180	X - 15461	433	TRUE	-3.10637	0.147025	-0.0985886	0.179534	0.135949	0.0468793	0.0253044	-0.962541	-1.09027	8.19949e-05	0.228858	0.406948	0.0463102	0.326358	0.00288497	0.000222107	0.782958	0.749461	0.801319	0.511597
77	mannose	433	TRUE	-2.63656	0.135912	-0.0991178	0.19115	0.237263	0.00913065	0.0743141	2.90532	1.21905	0.000302188	0.229213	0.367475	0.021837	0.0640892	0.530438	9.86528e-32	0.368778	0.699517	0.789545	0.511597
104	3-(3-amino-3-carboxypropyl)uridine*	433	TRUE	-1.36558	0.150469	-0.103567	0.418785	0.047865	0.00830689	0.0274359	9.13555	3.07428	0.091098	0.229444	0.395244	5.73893e-06	0.735947	0.606365	9.34779e-05	0.0107284	0.379525	0.795359	0.511597
675	orotidine	433	TRUE	-1.3435	0.151632	-0.142903	0.540331	0.268021	0.00895695	0.0224223	6.58941	1.11718	0.0990977	0.229534	0.244497	6.38941e-09	0.0610055	0.581481	0.00153556	0.0678719	0.751371	0.731074	0.511597
509	X - 23680	433	TRUE	-1.01452	0.149549	0.0651927	0.552064	0.139008	0.000752848	0.0244377	-8.83984	-0.657319	0.208747	0.231651	0.592034	2.12881e-09	0.326727	0.962702	0.000492444	0.0134253	0.850756	0.873449	0.514226
195	N-acetyl-beta-alanine	433	TRUE	0.4466	0.16488	-0.140841	0.580664	-0.121358	-0.0158667	0.0047022	-0.183521	-4.49892	0.615898	0.231861	0.293898	1.13171e-08	0.437604	0.371574	0.543243	0.962885	0.242997	0.746611	0.514226
505	N1-Methyl-2-pyridone-5-carboxamide	433	TRUE	-0.299432	0.149189	-0.0496201	0.187532	0.230638	-0.00905621	0.0218811	10.5408	-3.52261	0.710824	0.233098	0.683566	0.042096	0.103933	0.574017	0.00182006	0.00321935	0.313628	0.913531	0.515694
447	X - 21448	433	TRUE	-0.154526	0.150083	0.0782964	0.471576	-0.167175	0.0102625	-0.018877	-0.893699	-2.81251	0.849628	0.234571	0.523916	4.08902e-07	0.242831	0.527884	0.00768525	0.804517	0.42533	0.846475	0.517673
229	deoxycarnitine	433	TRUE	-0.780711	-0.146431	-0.0847735	0.979441	0.0744373	0.00494895	0.00612799	5.05477	-7.13094	0.326971	0.235304	0.480097	5.0502e-27	0.594602	0.755413	0.375877	0.151983	0.0385987	0.838218	0.517965
747	N6-acetyllysine	433	TRUE	-0.243727	0.151851	-0.0267919	0.0709752	0.102212	-0.000755039	0.00702072	14.3128	-3.39575	0.76819	0.235859	0.829806	0.452453	0.48154	0.96349	0.328495	9.34742e-05	0.34277	0.961265	0.517965
754	1-dihomo-linolenoyl-GPC (20:3n3 or 6)*	433	TRUE	-1.77385	0.150972	-0.142821	0.258591	-0.192229	0.0255949	0.0143759	12.9584	-1.47163	0.0320734	0.238942	0.252223	0.00623217	0.185945	0.121015	0.0455746	0.000408546	0.681198	0.731074	0.523452
522	phosphoethanolamine	433	TRUE	-0.651358	-0.152641	0.282625	-0.200969	-0.000110219	0.012165	0.00183308	2.26466	-6.71483	0.438905	0.241633	0.0258675	0.0365684	0.999405	0.468615	0.80204	0.543543	0.0652593	0.44604	0.528056
463	1-docosapentaenoyl-GPC (22:5n6)*	433	TRUE	-1.04672	0.151431	-0.020412	0.0843641	-0.185405	0.0147786	0.00858727	3.6809	-2.05031	0.214836	0.246714	0.872507	0.381508	0.210917	0.379963	0.24153	0.324831	0.574588	0.963954	0.535147
603	trans-2-hexenoylglycine	433	TRUE	-0.308401	0.15091	-0.136868	-0.606143	-0.317635	0.0272147	-0.0262102	5.09699	3.32003	0.713837	0.24673	0.280277	2.80689e-10	0.0315076	0.104742	0.00033467	0.171307	0.36176	0.742648	0.535147
580	uridine	433	TRUE	-0.240931	0.148981	0.174843	0.321349	-0.0684958	0.00220744	-0.000808144	-6.52342	-8.35055	0.771827	0.247066	0.162672	0.000709984	0.638758	0.894038	0.910865	0.0763476	0.0202345	0.703603	0.535147
889	homoarginine	433	TRUE	-0.219606	-0.140241	0.208006	0.362631	0.217747	-0.0166034	0.0337945	-20.8226	-8.89114	0.778961	0.247267	0.0777796	4.97015e-05	0.113043	0.287404	6.66079e-07	1.8888e-09	0.00865841	0.614329	0.535147
855	docosahexaenoylcholine	433	TRUE	-0.309172	0.153391	-0.188445	-0.0652397	-0.163801	0.0287321	-0.0365549	0.436667	-0.273232	0.718525	0.248366	0.144985	0.505563	0.276888	0.0931086	9.36002e-07	0.908519	0.941338	0.694084	0.536231
284	cerotoylcarnitine (C26)*	433	TRUE	-1.84568	0.143533	0.0750155	0.959279	-0.259279	0.036696	-0.0081465	-2.63322	-6.94884	0.0218167	0.249583	0.536284	1.72019e-25	0.066562	0.02225	0.243978	0.460148	0.0460536	0.850461	0.537564
292	citrulline	433	TRUE	-0.901327	0.136068	-0.156458	0.284409	-0.0924717	0.0240518	-0.0130097	6.29164	-2.88292	0.238359	0.250544	0.174502	0.0011266	0.490938	0.11471	0.0501445	0.0631946	0.383602	0.704927	0.538318
31	X - 11470	433	TRUE	0.932918	-0.137648	0.00830118	0.448147	-0.0421031	-0.0193456	-0.00773532	13.8528	-3.58096	0.228238	0.251135	0.943295	4.04956e-07	0.756837	0.21035	0.250218	5.37889e-05	0.285303	0.98583	0.538318
818	sphingomyelin (d18:2/18:1)*	433	TRUE	-1.34475	-0.141173	-0.0771066	-0.410781	-0.428926	0.0117686	0.0345837	-3.80786	-1.31809	0.0915693	0.252895	0.520997	6.43864e-06	0.00218195	0.459164	5.92054e-07	0.280863	0.702425	0.846475	0.540798
893	2-hydroxyoctanoate	433	TRUE	-1.38998	0.157472	-0.0256837	0.0831049	-0.058189	0.0425831	-0.023326	2.20167	1.31887	0.119509	0.254895	0.848644	0.415188	0.710554	0.0167992	0.00263944	0.577785	0.732902	0.961265	0.543777
595	1-(1-enyl-palmitoyl)-2-docosahexaenoyl-GPE (P-16:0/22:6)*	433	TRUE	0.925649	0.143278	-0.274766	0.0858293	0.0846083	0.00289868	-0.0398354	-11.7564	3.47871	0.256683	0.257078	0.0255019	0.357237	0.554956	0.858669	1.93227e-08	0.00114702	0.324727	0.44604	0.546386
686	5-methyluridine (ribothymidine)	433	TRUE	-0.358824	0.154268	0.00858458	0.368737	0.180405	0.0152824	-0.0192377	3.71527	-2.36838	0.68319	0.257375	0.948352	0.000241454	0.242662	0.383544	0.0117947	0.340179	0.533736	0.98583	0.546386
604	2-stearoyl-GPE (18:0)*	433	TRUE	0.192829	0.140946	-0.0200146	0.0506877	-0.0120355	0.00731421	-0.022324	12.313	-4.27794	0.810518	0.257948	0.868867	0.581165	0.932094	0.648448	0.00140039	0.00054883	0.219136	0.963954	0.546386
758	catechol sulfate	433	TRUE	0.361356	0.149828	0.0854239	0.100201	0.00511518	0.017993	-0.045421	-1.4223	2.56202	0.673283	0.259096	0.508429	0.306087	0.972888	0.292553	1.06246e-09	0.707951	0.48979	0.842397	0.547523
894	tetradecanedioate (C14-DC)	433	TRUE	-0.521048	0.14714	0.0997736	0.0521198	-0.255689	0.00831398	0.00179402	7.48966	-7.17501	0.537062	0.260503	0.432947	0.588864	0.0845682	0.621472	0.806764	0.045204	0.0495667	0.810653	0.549201
296	hypoxanthine	433	TRUE	0.178841	0.153652	0.165904	0.0567283	-0.314908	-0.0214089	0.0317594	-0.585755	-1.08244	0.839659	0.261812	0.213053	0.574256	0.0424958	0.224655	3.54517e-05	0.881094	0.777243	0.720701	0.550666
133	palmitoyl-oleoyl-glycerol (16:0/18:1) [2]*	433	TRUE	-1.9027	0.150123	-0.0292968	0.356723	0.306409	0.00984468	0.0469547	4.89239	-8.83869	0.0281586	0.263578	0.822578	0.000315262	0.044133	0.569101	4.53426e-10	0.202661	0.0184871	0.961265	0.552791
202	X - 21470	433	TRUE	0.744117	0.137797	0.239929	0.425966	0.0735556	-0.0301834	0.0167997	-8.49266	-7.69053	0.350143	0.264056	0.0456501	2.84381e-06	0.598966	0.0574419	0.0151957	0.0160865	0.0256934	0.531112	0.552791
652	myristoyl dihydrosphingomyelin (d18:0/14:0)*	433	TRUE	-0.181981	0.132243	-0.0649402	-0.228925	-0.321491	0.003344	0.00548413	7.5169	1.53843	0.812546	0.265962	0.574507	0.00901883	0.0170559	0.827072	0.410798	0.0270339	0.643259	0.86514	0.555019
471	sebacate (C10-DC)	433	TRUE	-0.829887	0.139918	0.100602	0.0158681	-0.202159	0.0220741	-0.00831443	8.45027	-2.25938	0.308759	0.267973	0.413029	0.864727	0.158006	0.174702	0.240546	0.0193161	0.522054	0.801319	0.555019
657	nervonoylcarnitine (C24:1)*	433	TRUE	-2.10713	0.139486	0.108334	0.495092	-0.420159	0.0549736	-0.0246285	1.41186	-11.9485	0.00956773	0.268208	0.376811	9.86603e-08	0.00326194	0.000701685	0.000491193	0.695148	0.000687907	0.795359	0.555019
158	imidazole lactate	433	TRUE	-0.0209914	0.141119	0.0528056	0.257104	0.106931	0.00901645	-0.0168697	10.4665	4.55627	0.979647	0.268246	0.670277	0.0062338	0.459304	0.582763	0.0182928	0.00408852	0.200801	0.912651	0.555019
365	N-acetyltaurine	433	TRUE	-0.632817	0.135883	-0.0487902	0.227763	-0.0894372	0.0102303	0.000875411	7.76456	7.98454	0.424898	0.268709	0.683159	0.0119364	0.520768	0.517821	0.898906	0.0271068	0.0200199	0.913531	0.555019
190	X - 11478	433	TRUE	-0.453826	0.143725	-0.0858896	0.116731	0.0863966	0.00411396	0.00787864	-13.3284	-3.56067	0.588589	0.268837	0.497059	0.223288	0.557658	0.805832	0.279831	0.00033629	0.326891	0.842397	0.555019
387	1-(1-enyl-palmitoyl)-2-linoleoyl-GPC (P-16:0/18:2)*	433	TRUE	2.1311	0.139338	-0.0779027	-0.132967	-0.33561	-0.00666296	-0.0604712	-0.429573	3.79093	0.00899699	0.270249	0.526408	0.153671	0.0191604	0.682221	1.45419e-17	0.905392	0.283049	0.846475	0.556035
646	(S)-a-amino-omega-caprolactam	433	TRUE	-1.0716	0.143546	0.0862852	0.52022	0.285223	0.00383852	0.0235479	9.38338	0.782997	0.202616	0.270571	0.496101	6.14653e-08	0.0534756	0.81902	0.00127134	0.0117908	0.829705	0.842397	0.556035
678	deoxycholic acid (12 or 24)-sulfate*	433	TRUE	0.156045	0.150372	0.0998896	0.0916527	0.14036	-0.0115968	0.0111721	-3.25703	-4.61534	0.860027	0.272675	0.453924	0.364599	0.366432	0.511189	0.146212	0.406087	0.228231	0.826723	0.559077
590	erythritol	433	TRUE	0.775462	0.155042	-0.243855	0.0586973	0.133345	-0.0137157	-0.00427195	1.61086	0.69307	0.396443	0.273767	0.0768737	0.574205	0.406368	0.452102	0.590821	0.690916	0.861008	0.614329	0.560036
346	1-pentadecanoyl-2-arachidonoyl-GPC (15:0/20:4)*	433	TRUE	-0.569281	0.142416	0.336108	-0.179653	0.141827	-0.00376502	0.025737	13.4006	3.92751	0.499469	0.275462	0.0081638	0.0621039	0.338056	0.822828	0.000441634	0.000332887	0.281763	0.406376	0.562219
883	linoleoyl-arachidonoyl-glycerol (18:2/20:4) [1]*	433	TRUE	-1.01387	0.134012	0.00294677	0.393557	0.614502	-0.0123524	0.0493665	-0.112554	0.815909	0.202683	0.277048	0.980402	1.49961e-05	1.0995e-05	0.436506	9.39726e-13	0.974534	0.812776	0.986869	0.564053
24	X - 18886	433	TRUE	-0.600978	0.143684	0.0456857	0.409458	0.126783	0.00631951	0.0035101	2.67371	-0.590601	0.481764	0.27762	0.722753	2.72297e-05	0.398092	0.710755	0.636303	0.479918	0.873108	0.923804	0.564053
632	X - 23974	433	TRUE	0.030209	0.131955	-0.26679	0.0148611	-0.231394	0.0169122	-0.0271964	0.257517	5.33878	0.969332	0.278337	0.0242842	0.868503	0.093568	0.28057	6.78904e-05	0.941029	0.116484	0.44604	0.564231
298	threonate	433	TRUE	0.305298	0.141769	0.19115	-0.0275542	-0.173946	0.0188565	-0.0425684	3.26311	-4.21806	0.718892	0.280617	0.134884	0.776129	0.242911	0.265059	7.64622e-09	0.385186	0.250605	0.682803	0.567039
543	4-hydroxychlorothalonil	433	TRUE	-0.613669	-0.137322	0.0252873	-0.0957215	-0.0666482	0.0179578	-0.00668896	6.65715	2.35853	0.456004	0.281575	0.838519	0.308758	0.644802	0.274135	0.349713	0.0679513	0.508049	0.961265	0.567039
234	sphingomyelin (d18:1/14:0, d16:1/16:0)*	433	TRUE	-2.09946	0.133734	-0.102738	-0.126605	-0.558676	0.0379685	0.0138161	7.48181	-0.609726	0.00888072	0.281963	0.395608	0.167205	7.3463e-05	0.0176764	0.0475025	0.0353085	0.86064	0.795359	0.567039
417	21-hydroxypregnenolone disulfate	433	TRUE	1.05185	-0.130094	0.281206	0.440994	0.0256659	-0.0289416	0.00343453	-1.02637	-5.16619	0.178294	0.282534	0.0169692	7.81615e-07	0.851646	0.0633541	0.612974	0.766874	0.126684	0.43441	0.567039
662	thymol sulfate	433	TRUE	-0.104749	0.143516	-0.117992	0.462764	-0.151498	0.0101323	-0.0166409	4.2095	10.2352	0.903441	0.283297	0.364621	2.7119e-06	0.317754	0.556334	0.0265472	0.271136	0.00617124	0.789545	0.567039
372	4-vinylphenol sulfate	433	TRUE	-1.11738	0.141081	-0.0369471	0.392071	0.0291181	0.0292437	-0.0163599	7.68048	-1.91972	0.188228	0.283519	0.772847	5.3094e-05	0.845197	0.0842685	0.0266036	0.0411958	0.601482	0.942138	0.567039
121	androstenediol (3beta,17beta) monosulfate (1)	433	TRUE	1.34598	0.120823	0.100252	0.781306	0.000670809	-0.0423559	0.0128674	-3.07439	-6.04112	0.0657106	0.286233	0.363133	8.64464e-21	0.995833	0.00369147	0.0428785	0.34269	0.0563527	0.789545	0.571191
110	glycerophosphorylcholine (GPC)	433	TRUE	-1.50565	0.167712	-0.143632	0.192371	-0.206391	0.0291536	0.00453919	6.8334	-0.0379654	0.138602	0.286921	0.348597	0.0976415	0.247683	0.150538	0.607341	0.129213	0.993116	0.783621	0.571291
221	X - 21364	433	TRUE	-0.298478	0.129244	0.252073	0.660741	0.101061	-0.0145961	0.0233463	-3.22653	-2.67288	0.703844	0.287993	0.0331838	1.75544e-13	0.463625	0.351374	0.000621532	0.353643	0.431612	0.495545	0.572154
525	X - 23639	433	TRUE	-0.248554	0.130878	-0.0526169	0.136925	-0.183552	0.0272236	-0.0388394	5.65829	0.784686	0.756017	0.290913	0.662563	0.134046	0.191363	0.0879891	2.29753e-08	0.110353	0.820721	0.910516	0.57551
243	1-palmityl-2-oleoyl-GPC (O-16:0/18:1)*	433	TRUE	2.75884	-0.136983	-0.0353508	-0.287353	-0.322338	-0.0186594	-0.059175	3.98666	4.09322	0.000985203	0.290966	0.779414	0.00266498	0.0283833	0.263934	4.17553e-16	0.282525	0.258767	0.943664	0.57551
519	1-eicosenoyl-GPC (20:1)*	433	TRUE	-0.162816	0.11777	-0.138329	0.221277	-0.379713	0.0372051	-0.0602525	0.359496	-6.35206	0.823612	0.297981	0.208976	0.0080067	0.00307593	0.0106644	2.23172e-21	0.911543	0.0445337	0.720701	0.587158
288	tridecenedioate (C13:1-DC)*	433	TRUE	-0.953049	0.138192	0.187275	0.303177	-0.25814	0.0084962	0.0150038	3.23207	-6.06598	0.266347	0.298166	0.14733	0.00196708	0.0864767	0.61936	0.0440177	0.394852	0.102175	0.694084	0.587158
327	glucuronate	433	TRUE	0.793462	0.137528	-0.0921093	0.169368	0.375046	-0.0292033	0.0156678	0.495644	-1.74976	0.353922	0.29965	0.475269	0.0832543	0.012596	0.0871832	0.0351421	0.896007	0.636732	0.838218	0.588786
112	X - 12101	433	TRUE	-1.09878	0.141134	-0.0730144	-0.0931915	0.00251024	0.0315591	-0.0141852	-6.9851	4.14956	0.212843	0.301636	0.582864	0.355019	0.98707	0.0728444	0.0641684	0.0738367	0.27708	0.87041	0.590932
887	X - 12544	433	TRUE	0.723633	-0.143381	-0.0543992	0.186031	-0.0985309	0.000305492	-0.026047	6.23066	9.93444	0.419737	0.302061	0.687376	0.0694051	0.531585	0.986375	0.000829896	0.116839	0.0104939	0.916502	0.590932
665	X - 21258	433	TRUE	-1.3387	0.129591	0.0288916	0.265649	0.0209237	0.048476	-0.0408636	3.62282	10.3723	0.0991825	0.302858	0.81337	0.00418217	0.883335	0.00276052	6.93305e-09	0.313844	0.00316365	0.961265	0.591201
29	3-hydroxypyridine sulfate	433	TRUE	-1.09304	0.130886	0.0361399	0.443328	-0.172804	0.0400344	-0.0354925	8.62793	2.04736	0.183188	0.303557	0.770315	2.29449e-06	0.230841	0.0145262	6.55218e-07	0.0177158	0.56464	0.94033	0.591275
655	branched-chain, straight-chain, or cyclopropyl 10:1 fatty acid (1)*	433	TRUE	0.138626	0.136018	0.0320275	-0.518258	-0.337094	0.0123364	-0.0197413	5.20855	-1.18802	0.871696	0.306342	0.804485	1.25478e-07	0.0253363	0.471202	0.00812068	0.170778	0.749153	0.957854	0.595357
323	1-oleoylglycerol (18:1)	433	TRUE	-2.43548	0.140249	0.0613992	0.324663	0.0495521	0.0404191	0.0125027	6.46907	-1.86633	0.00599225	0.306981	0.645771	0.00134184	0.750193	0.0222254	0.104438	0.0994143	0.626591	0.905494	0.595357
88	1-(1-enyl-stearoyl)-2-linoleoyl-GPC (P-18:0/18:2)*	433	TRUE	1.43575	0.128058	-0.0277897	-0.186205	-0.377242	0.00886294	-0.061061	-2.68629	4.71397	0.0775959	0.309588	0.82072	0.0451204	0.00828158	0.584961	5.71213e-18	0.456079	0.180691	0.961265	0.599116
591	alpha-ketobutyrate	433	TRUE	-1.17533	0.136317	-0.105008	-0.0457041	0.119516	0.00871703	0.0263522	1.29381	-8.92784	0.176028	0.311045	0.422541	0.645098	0.433353	0.614894	0.000480166	0.736713	0.0175736	0.807886	0.600639
532	cortolone glucuronide (1)	433	TRUE	-2.22847	0.1142	-0.156043	0.471113	0.0627021	0.00272646	0.0671979	-2.76758	-3.05338	0.00228515	0.312932	0.156458	1.65153e-08	0.625037	0.851582	3.44392e-26	0.392484	0.33425	0.698593	0.602983
699	3-hydroxylaurate	433	TRUE	-0.0782277	-0.136015	0.24265	-0.137433	-0.13254	0.00055165	0.00303509	-0.926534	-0.44367	0.928492	0.313822	0.0647814	0.167552	0.386608	0.97469	0.688622	0.810391	0.906396	0.586304	0.6034
677	X - 21353	433	TRUE	0.102863	-0.131409	0.174668	0.0683037	-0.0271158	-0.00120308	-0.00354168	-7.89719	-1.31501	0.902975	0.314757	0.169658	0.478586	0.854813	0.943017	0.629049	0.0346413	0.718822	0.704927	0.603903
386	2-piperidinone	433	TRUE	-0.320117	0.125233	-0.1004	0.274241	0.102272	-0.000182352	0.0075929	-16.7404	-6.28354	0.691057	0.315564	0.408275	0.00287959	0.469692	0.990945	0.277965	2.71642e-06	0.0715134	0.801319	0.604156
67	glycocholate	433	TRUE	0.0332535	0.129549	0.0568881	0.176513	0.0349466	-0.0181655	0.0240197	0.296083	-0.905344	0.968282	0.317324	0.651775	0.0646606	0.811923	0.27617	0.000947645	0.936304	0.802509	0.906818	0.606231
570	glycoursodeoxycholate	433	TRUE	0.527898	0.129058	-0.10795	0.064828	0.262396	-0.0297974	0.0273593	-5.36633	-5.89991	0.527045	0.318181	0.39083	0.496538	0.0734158	0.0734729	0.000161381	0.146679	0.102435	0.795359	0.606576
786	4-ethylcatechol sulfate	433	TRUE	-0.412178	-0.127815	0.106889	0.0972379	0.0944941	0.0307788	-0.0385905	8.63406	3.00483	0.61875	0.319198	0.39192	0.304123	0.515949	0.0624782	8.22519e-08	0.0186277	0.401978	0.795359	0.607222
403	choline phosphate	433	TRUE	-0.8284	-0.125488	0.175231	0.117285	0.0838505	0.0224004	-0.0129764	-0.235841	-4.95669	0.310212	0.321055	0.154419	0.208517	0.558631	0.168931	0.06733	0.948006	0.160692	0.698593	0.60785
222	X - 24588	433	TRUE	-1.58354	0.123906	-0.0442307	0.845144	0.108978	0.0105776	0.0249087	1.08864	3.45192	0.0496092	0.321364	0.715996	4.63044e-20	0.441683	0.510886	0.000379004	0.760625	0.322795	0.923069	0.60785
148	X - 17010	433	TRUE	-0.439987	0.128684	-0.108451	-0.116298	-0.0930635	0.00474129	0.011733	-13.5615	0.903433	0.599827	0.321921	0.390923	0.224778	0.527463	0.776847	0.107356	0.000262089	0.803457	0.795359	0.60785
212	carotene diol (1)	433	TRUE	0.735728	0.120109	0.00350171	-0.117054	-0.266591	0.025568	-0.0678066	-5.6466	-1.07391	0.347571	0.322242	0.976338	0.190815	0.0526171	0.101742	2.20572e-23	0.103687	0.751434	0.986869	0.60785
399	N-formylphenylalanine	433	TRUE	-0.847064	0.134466	-0.0900267	-0.0345472	-0.28341	0.0142759	0.0081175	2.2532	-2.80233	0.335757	0.323951	0.497317	0.731107	0.0666757	0.416053	0.288391	0.563295	0.461916	0.842397	0.60979
313	salicylate	433	TRUE	-1.00125	0.121233	0.128908	0.0995202	0.405546	0.0228512	-0.00953121	0.597157	0.848	0.209936	0.32712	0.284221	0.275341	0.00383321	0.151435	0.169572	0.865968	0.806215	0.746611	0.614464
670	methyl-4-hydroxybenzoate sulfate	433	TRUE	-0.340589	-0.130782	-0.260285	-0.530428	-0.0622565	0.0191885	-0.0117099	-2.2648	-1.62708	0.693275	0.328252	0.0455314	7.57584e-08	0.681424	0.26528	0.118598	0.553847	0.663345	0.531112	0.615301
84	myristoyl-linoleoyl-glycerol (14:0/18:2) [1]*	433	TRUE	-0.996304	0.129673	0.0124707	0.37374	0.335297	-0.00832962	0.0449504	0.825769	-8.29475	0.248495	0.332266	0.923655	0.000150988	0.0270054	0.628609	2.06917e-09	0.829067	0.0264445	0.982346	0.619704
379	pregnanediol-3-glucuronide	433	TRUE	3.72047	-0.121716	0.457357	-0.517474	-0.222389	-0.0599762	-0.0219436	4.44519	1.15288	4.48615e-06	0.332648	0.000183033	2.33206e-08	0.118426	0.000209358	0.0018454	0.216013	0.7426	0.117864	0.619704
295	phosphatidylcholine (16:0/22:5n3, 18:1/20:4)*	433	TRUE	-1.03816	0.129851	-0.0330759	-0.125593	-0.112164	0.0276125	-0.0060505	1.98392	-3.37124	0.230211	0.332676	0.7998	0.203876	0.460436	0.109634	0.420939	0.604775	0.368058	0.954222	0.619704
203	5-acetylamino-6-formylamino-3-methyluracil	433	TRUE	0.419669	0.125213	-0.00800104	0.114477	-0.178429	-0.00081147	-0.0118001	-0.783411	-2.63733	0.616706	0.33505	0.949521	0.232027	0.22561	0.961303	0.105289	0.832964	0.467427	0.98583	0.621235
852	1-margaroyl-GPE (17:0)*	433	TRUE	1.10121	0.127629	0.180068	-0.00928361	0.164863	-0.0133461	-0.0206506	8.4338	-1.2245	0.197662	0.335149	0.162256	0.924261	0.27212	0.433796	0.00542996	0.0259462	0.740692	0.703603	0.621235
307	1-margaroyl-2-linoleoyl-GPC (17:0/18:2)*	433	TRUE	-0.721292	0.119317	-0.0367231	-0.170461	-0.443728	0.0404508	-0.0375492	-7.17361	-4.57409	0.367172	0.335578	0.760673	0.0621077	0.00158371	0.0112336	6.55484e-08	0.0429269	0.186451	0.938722	0.621235
875	16a-hydroxy DHEA 3-sulfate	433	TRUE	-0.54739	-0.117469	0.437411	0.481582	-0.0281336	-0.00927654	0.0278733	-6.54008	-8.43604	0.492335	0.341542	0.000272715	1.23894e-07	0.840748	0.559673	5.72685e-05	0.0640738	0.0145025	0.117864	0.630972
78	2-hydroxystearate	433	TRUE	-1.2008	0.124887	-0.0388925	0.0369085	-0.229314	0.0298249	-0.0111628	-1.60284	6.14583	0.157905	0.343096	0.761554	0.703984	0.124643	0.078684	0.130821	0.670489	0.0949699	0.938722	0.631243
472	palmitoleoyl-arachidonoyl-glycerol (16:1/20:4) [2]*	433	TRUE	-1.65809	0.121162	0.0045624	0.171293	0.619894	0.0123747	0.0348623	1.52675	-1.07755	0.0444443	0.343098	0.970732	0.0691314	1.88033e-05	0.452053	1.15269e-06	0.67614	0.762839	0.986869	0.631243
475	pregnenediol disulfate (C21H34O8S2)*	433	TRUE	1.25494	-0.112486	0.249202	0.725976	-0.116131	-0.0372445	0.00699237	-6.62157	-6.48516	0.103905	0.346739	0.0321614	1.796e-16	0.3915	0.0155395	0.297022	0.0527684	0.0522008	0.488416	0.636636
731	(S)-3-hydroxybutyrylcarnitine	433	TRUE	-1.64369	0.125337	-0.0589338	-0.104874	0.0856994	0.0315375	0.00319001	-8.83536	-1.09657	0.0568157	0.348469	0.650493	0.287411	0.571747	0.06693	0.670512	0.0208301	0.769089	0.906818	0.638082
165	X - 16944	433	TRUE	-0.500877	0.126429	0.0192683	0.12511	0.122627	-0.00212403	0.0183578	-11.8544	-6.07932	0.565717	0.349341	0.883457	0.209168	0.423302	0.902814	0.0154005	0.00215199	0.107279	0.966885	0.638082
177	glycerophosphoethanolamine	433	TRUE	-1.15954	0.126819	-0.171948	0.125299	-0.0714037	0.0200089	0.00417119	2.23634	-3.2675	0.186302	0.350794	0.193537	0.211262	0.643074	0.252919	0.58427	0.565062	0.389585	0.708224	0.638082
466	metabolonic lactone sulfate	433	TRUE	-1.89346	0.104275	-0.0214042	0.349867	0.0903854	-0.0151243	0.0877635	6.66672	-13.1995	0.00877555	0.351527	0.844187	2.24678e-05	0.476259	0.293982	2.06069e-44	0.037272	2.43685e-05	0.961265	0.638082
709	X - 17357	433	TRUE	-2.02295	0.121264	-0.0840621	0.60992	0.00954414	0.0119382	0.0413553	-1.3999	-2.77838	0.0166699	0.354278	0.509278	2.64909e-10	0.948722	0.478796	1.77703e-08	0.708455	0.447508	0.842397	0.638082
613	(2 or 3)-decenoate (10:1n7 or n8)	433	TRUE	0.509655	-0.124574	0.124533	-0.188881	-0.119755	-0.00463225	-0.00850936	-7.09498	-0.545385	0.558655	0.356125	0.343093	0.0577893	0.433923	0.789866	0.261088	0.0661006	0.885039	0.782217	0.638082
18	oleoyl-oleoyl-glycerol (18:1/18:1) [2]*	433	TRUE	-1.93602	0.123327	-0.116839	0.222126	0.321249	0.0219706	0.0305747	4.50281	-9.89957	0.0248558	0.356222	0.369021	0.0242372	0.0340164	0.201797	4.54297e-05	0.238847	0.00803908	0.789545	0.638082
171	4-methyl-2-oxopentanoate	433	TRUE	0.315489	0.116703	0.0593899	0.946064	0.179018	-0.0196985	0.00554239	7.5111	-4.88191	0.699305	0.356358	0.629525	3.70318e-24	0.212027	0.226639	0.434822	0.0379189	0.16733	0.892491	0.638082
760	X - 21441	433	TRUE	1.35284	-0.125854	0.118402	0.23435	0.185331	-0.030249	-0.00302225	-3.84766	-1.16353	0.124771	0.356617	0.372761	0.0199278	0.231136	0.085304	0.693077	0.32439	0.76036	0.791012	0.638082
421	S-1-pyrroline-5-carboxylate	433	TRUE	-1.73998	0.121066	-0.254656	0.182824	0.0595607	0.0325415	-0.000450357	-0.684433	11.5996	0.0404779	0.357455	0.046661	0.0595046	0.689636	0.054735	0.951333	0.85565	0.00160236	0.531112	0.638082
804	1-ribosyl-imidazoleacetate*	433	TRUE	-0.902987	0.11074	-0.0631858	0.602773	0.0455968	0.0131865	0.0017004	5.05799	6.85588	0.245232	0.357625	0.589583	1.12152e-11	0.738297	0.394937	0.801167	0.141781	0.0415294	0.873449	0.638082
456	oxalate (ethanedioate)	433	TRUE	0.617263	0.114913	0.0372742	-0.311082	-0.317734	0.0200233	-0.0513145	6.76842	-3.10293	0.444761	0.358444	0.759494	0.000748393	0.0251018	0.213963	2.64245e-13	0.0585706	0.374826	0.938722	0.638082
96	1,3-dimethylurate	433	TRUE	0.364689	0.118503	0.0637262	0.197131	-0.178141	-0.00237068	-0.00793879	6.27136	-1.50444	0.662417	0.3598	0.612773	0.0388513	0.224627	0.886862	0.274047	0.0901467	0.677355	0.878823	0.638082
58	sphingomyelin (d18:2/14:0, d18:1/14:1)*	433	TRUE	-3.1572	0.0990603	-0.0851513	-0.740605	-0.423787	0.0484632	0.0392464	8.61619	-1.92429	6.25523e-06	0.360204	0.418899	1.75433e-20	0.0005547	0.000508118	1.02559e-10	0.00538828	0.524706	0.807886	0.638082
752	ceramide (d18:1/17:0, d17:1/18:0)*	433	TRUE	-1.61082	-0.120112	-0.15623	0.118186	-0.126968	0.0112059	0.0378878	3.4913	-3.22735	0.0573877	0.360348	0.221414	0.222275	0.393707	0.507489	2.68539e-07	0.352524	0.379073	0.724041	0.638082
48	X - 11483	433	TRUE	1.5689	-0.111592	-0.0251575	0.0382853	-0.0473093	-0.0235962	-0.0146784	7.48146	6.41573	0.0463933	0.360447	0.832192	0.670495	0.732353	0.133149	0.0319757	0.0320395	0.0598757	0.961265	0.638082
438	linoleoyl-linolenoyl-glycerol (18:2/18:3) [2]*	433	TRUE	0.32371	-0.114731	-0.120809	0.40482	0.385516	-0.0273981	0.0301783	-1.29195	-5.74958	0.689515	0.360698	0.322582	1.22302e-05	0.00674411	0.0900426	1.81456e-05	0.718915	0.101143	0.776962	0.638082
865	1-(1-enyl-palmitoyl)-2-palmitoyl-GPC (P-16:0/16:0)*	433	TRUE	1.91979	0.119514	0.0850981	-0.0119102	-0.496459	-0.0151468	-0.040848	4.46114	3.38424	0.0231166	0.361337	0.504134	0.901824	0.000823394	0.36894	2.65922e-08	0.233474	0.354925	0.842397	0.638082
871	1-(1-enyl-palmitoyl)-2-docosahexaenoyl-GPC (P-16:0/22:6)*	433	TRUE	1.1247	0.115097	-0.0634562	0.0522815	-0.0246258	0.00276605	-0.0455467	-2.80178	3.96516	0.167252	0.361591	0.605186	0.574132	0.86329	0.86479	1.21881e-10	0.437401	0.260644	0.877646	0.638082
811	2-naphthol sulfate	433	TRUE	-0.0211909	-0.130978	-0.279734	0.311697	-0.144505	-0.00904279	0.0167614	3.51476	2.14103	0.981805	0.362866	0.0457961	0.00332052	0.375867	0.625632	0.0378856	0.393208	0.594502	0.531112	0.638082
837	glycodeoxycholate 3-sulfate	433	TRUE	-0.19314	0.120022	0.00829408	0.172736	-0.0724862	0.00553205	-0.00666617	4.90085	-1.37806	0.820619	0.363042	0.948492	0.0758687	0.627982	0.744731	0.367737	0.194039	0.708579	0.98583	0.638082
64	X - 11632	433	TRUE	-0.585913	0.127662	-0.0867277	0.274483	0.0914376	0.0146345	-0.00495665	4.26084	2.6298	0.518507	0.363826	0.526054	0.00810464	0.566143	0.418822	0.529595	0.289228	0.503184	0.846475	0.638082
419	pipecolate	433	TRUE	0.716698	0.113203	0.105674	0.0653204	-0.12452	-0.00312844	-0.0211078	3.5822	3.46724	0.373201	0.363906	0.38371	0.477429	0.378333	0.845496	0.00254107	0.315062	0.319611	0.795359	0.638082
271	2-aminophenol sulfate	433	TRUE	-0.418652	0.119057	0.224481	0.0911279	0.294845	0.0166842	-0.0194474	3.90715	4.28459	0.6229	0.366681	0.0802414	0.348777	0.0486095	0.325877	0.00856414	0.300248	0.244968	0.614329	0.641691
476	gamma-glutamylisoleucine*	433	TRUE	-1.98355	0.102016	-0.252329	0.907791	0.248936	0.00267922	0.0518773	1.14573	-1.92093	0.00760388	0.375533	0.0242802	1.09552e-26	0.0564643	0.856569	9.40566e-16	0.727835	0.550389	0.44604	0.655209
437	sphingosine	433	TRUE	-0.518006	-0.115008	0.239088	0.0599819	-0.147274	-0.00412089	0.0245249	4.67023	-5.83294	0.536653	0.375868	0.0584893	0.531123	0.317172	0.805355	0.000760439	0.2086	0.107973	0.56351	0.655209
617	sphingomyelin (d18:2/24:1, d18:1/24:2)*	433	TRUE	-0.828407	-0.110574	0.00415283	-0.412415	-0.586906	0.02484	-0.00696993	-2.38182	-0.208853	0.305962	0.377739	0.972839	8.14581e-06	3.62936e-05	0.123826	0.321532	0.50644	0.952453	0.986869	0.657192
838	1-methylxanthine	433	TRUE	0.4046	0.115286	0.123195	0.313293	-0.228383	0.00432254	-0.0226992	7.55904	0.523821	0.632103	0.378529	0.333473	0.00117379	0.123845	0.797623	0.00199233	0.0434858	0.886133	0.780974	0.657248
800	ceramide (d16:1/24:1, d18:1/22:1)*	433	TRUE	-1.66382	0.118256	-0.125813	0.164618	-0.0950089	0.019944	0.0214036	8.05141	-4.68442	0.0556278	0.379881	0.336976	0.097394	0.533733	0.250083	0.00460175	0.0365663	0.213169	0.780974	0.657248
71	carnitine	433	TRUE	-3.06103	0.122455	-0.208516	0.599	0.246493	0.04255	0.0267672	-1.73041	-6.12241	0.000674358	0.379972	0.124425	5.75584e-09	0.11902	0.0178259	0.000622535	0.664421	0.116192	0.677913	0.657248
353	X - 23997	433	TRUE	0.254122	-0.109422	0.119885	-0.126369	-0.0298376	0.00889098	-0.0214252	6.44718	5.2501	0.752674	0.3811	0.32401	0.170159	0.833138	0.580462	0.00223044	0.0711436	0.132576	0.776962	0.657931
36	1-(1-enyl-stearoyl)-2-arachidonoyl-GPC (P-18:0/20:4)	433	TRUE	0.240159	0.119583	0.0274959	0.225249	-0.0971411	-0.0030419	-0.00802436	2.11201	7.21512	0.785868	0.382531	0.836511	0.0257126	0.53149	0.863034	0.296142	0.589682	0.0593431	0.961265	0.658364
86	X - 24522	433	TRUE	-1.45122	-0.116309	-0.149872	0.244246	0.00136731	0.0175239	0.0178042	15.0577	2.79041	0.0916276	0.382821	0.247782	0.0129474	0.992779	0.307172	0.0172263	7.79052e-05	0.453657	0.731074	0.658364
302	gamma-glutamylvaline	433	TRUE	-1.59074	0.106494	-0.255946	0.716683	0.327848	0.00397763	0.0389138	-11.6345	-0.129973	0.0441784	0.38449	0.0317046	2.0801e-15	0.0181941	0.800836	1.46373e-08	0.000892879	0.969699	0.488416	0.659357
592	valine	433	TRUE	-1.21033	0.113786	-0.152586	0.762651	0.130929	-4.40822e-05	0.0328149	0.955438	-2.92828	0.152701	0.385476	0.231664	3.07308e-15	0.378386	0.997917	8.1075e-06	0.798866	0.424107	0.730571	0.659357
414	1-stearoyl-2-docosapentaenoyl-GPE (18:0/22:5n6)*	433	TRUE	-0.72699	0.112613	-0.0449547	-0.20991	0.294285	-0.0062146	0.0385546	1.1904	-2.10674	0.385572	0.385606	0.721871	0.0283035	0.0455028	0.710009	1.18384e-07	0.748441	0.561311	0.923804	0.659357
246	X - 13728	433	TRUE	0.113056	0.104817	-0.138628	0.0456133	-0.123473	-0.000797826	0.00284948	14.436	-0.61226	0.885094	0.387101	0.239747	0.609781	0.368805	0.959224	0.675065	3.11031e-05	0.856519	0.731074	0.660652
257	methionine sulfone	433	TRUE	-0.344456	0.110941	-0.284063	-0.0917524	0.21677	0.0242961	-0.0298788	-0.722087	2.3862	0.678994	0.389572	0.0235649	0.334576	0.138092	0.143368	3.60526e-05	0.844751	0.507774	0.44604	0.663606
423	X - 11308	433	TRUE	0.724886	-0.105923	-0.100734	0.551798	0.226664	-0.0331405	0.0236604	-11.4996	-1.60186	0.36593	0.393762	0.404534	1.69581e-09	0.107445	0.0382446	0.000682732	0.00120565	0.644389	0.801319	0.66947
65	X - 11880	433	TRUE	0.213794	-0.109378	-0.0561532	0.334951	0.175394	-0.0209393	0.0232758	-5.01187	-5.79171	0.796962	0.39551	0.653927	0.000418061	0.229417	0.206494	0.00126538	0.173389	0.107358	0.906994	0.671169
637	1-arachidoyl-GPC (20:0)	433	TRUE	0.190507	0.0951542	-0.080743	0.251528	-0.339958	0.0334778	-0.0669567	2.25015	-2.40564	0.793273	0.39814	0.461197	0.00245548	0.00774812	0.0209594	2.96235e-26	0.484752	0.444564	0.831454	0.673627
895	gamma-glutamylglutamate	433	TRUE	-3.15972	-0.10157	-0.247503	0.548229	0.00200096	0.0288978	0.0559417	-3.03468	-1.30025	4.77327e-05	0.398777	0.0345817	6.56901e-10	0.988301	0.0622576	1.17124e-16	0.378013	0.699059	0.504368	0.673627
810	thioproline	433	TRUE	-1.60509	-0.115643	0.00777644	0.38259	0.239887	0.0104979	0.0331491	5.86712	2.59278	0.069886	0.399214	0.953539	0.000155499	0.122931	0.552282	1.6436e-05	0.13476	0.498753	0.986869	0.673627
776	sarcosine	433	TRUE	-1.00477	-0.112699	-0.199866	0.269298	0.171272	0.0141755	0.00332241	-15.3191	2.17206	0.245133	0.400062	0.12508	0.0063955	0.259281	0.411057	0.658266	6.33964e-05	0.561615	0.677913	0.673788
647	quinate	433	TRUE	-0.581931	0.116673	0.0850756	0.156364	-0.135093	0.0241929	-0.0244686	3.31288	1.17924	0.516591	0.401223	0.529291	0.127115	0.391238	0.176432	0.0016965	0.404581	0.761397	0.846475	0.674475
293	1-stearoyl-GPI (18:0)	433	TRUE	-2.76002	0.114682	0.0149759	-0.0897287	-0.287301	0.0576172	-0.00250049	5.98035	3.54872	0.00180745	0.402655	0.91057	0.374573	0.0644003	0.00109307	0.744927	0.127001	0.354022	0.978263	0.675616
373	glycocholenate sulfate*	433	TRUE	-0.32877	0.117656	0.244413	0.199134	-0.118737	-0.0149463	0.0309068	1.84864	-1.83256	0.719798	0.407278	0.0768496	0.0571738	0.460691	0.4136	0.000103939	0.648893	0.644123	0.614329	0.68098
339	X - 17335	433	TRUE	-0.785058	-0.113795	0.0716692	0.140753	-0.216941	0.0214627	-0.00894648	-1.10772	2.2887	0.376394	0.407856	0.592138	0.165059	0.163965	0.225376	0.245983	0.778154	0.551335	0.873449	0.68098
359	taurodeoxycholate	433	TRUE	0.522823	-0.106132	-0.0230855	-0.0121481	0.121442	-0.00969672	-0.0017602	6.06848	2.6927	0.528257	0.408568	0.853426	0.897932	0.404198	0.55761	0.806944	0.0984655	0.453015	0.96306	0.68098
520	3-methylxanthine	433	TRUE	0.137177	0.102709	-0.149858	0.00697535	-0.229887	0.00726709	-0.010931	15.6546	-1.12609	0.864375	0.409062	0.215738	0.939396	0.103117	0.650092	0.117234	1.08309e-05	0.745988	0.720701	0.68098
706	5-dodecenoylcarnitine (C12:1)	433	TRUE	-1.13877	-0.110113	0.0747237	-0.230533	-0.0465996	0.0157591	0.0164883	-0.752147	0.913548	0.186584	0.409717	0.565316	0.0192589	0.758274	0.35951	0.0277425	0.8439	0.806627	0.86214	0.68098
429	(R)-3-hydroxybutyrylcarnitine	433	TRUE	-1.2512	0.110183	-0.026096	0.111948	0.00876379	0.0252452	-0.00186908	-0.83703	-0.638344	0.147594	0.410412	0.841191	0.256735	0.953944	0.142989	0.80339	0.826911	0.864477	0.961265	0.68098
688	creatine	433	TRUE	0.0182534	0.0984896	-0.123044	-0.849603	0.125515	-0.0092076	0.0247336	-2.41208	-5.20897	0.981202	0.411846	0.29202	8.00949e-22	0.356248	0.551286	0.000238402	0.482188	0.12034	0.746611	0.682074
111	hydantoin-5-propionate	433	TRUE	0.040494	0.101175	0.00790204	0.210287	0.0486235	-0.0296367	0.0458551	9.77776	0.427216	0.959484	0.412594	0.947562	0.0209276	0.728336	0.0623317	3.5733e-11	0.00562624	0.901459	0.98583	0.682074
398	hexadecanedioate (C16-DC)	433	TRUE	-0.463406	0.105215	0.0926917	-0.0594404	-0.251723	0.0110651	-0.00394842	12.4875	-0.430332	0.577958	0.414826	0.460326	0.532169	0.0852714	0.50541	0.585348	0.000714016	0.904989	0.831454	0.6845
42	sphingomyelin (d18:0/20:0, d16:0/22:0)*	433	TRUE	-1.90986	-0.104356	0.0420864	-0.0509068	-0.11064	0.0194169	0.0363725	2.91351	-2.70454	0.0227267	0.421699	0.739109	0.595064	0.452392	0.245624	5.94377e-07	0.432804	0.456122	0.932804	0.694279
168	2-aminooctanoate	433	TRUE	-1.67537	0.106468	0.021587	0.624803	0.0358467	0.0479602	-0.032748	1.52413	-1.80005	0.0504518	0.422301	0.867202	1.70554e-10	0.811633	0.00499641	1.07974e-05	0.687922	0.627295	0.963954	0.694279
842	hydroxy-CMPF*	433	TRUE	0.312494	-0.105795	-0.154569	0.00782519	0.105887	0.026615	-0.0556761	-0.71677	3.23846	0.71452	0.424055	0.229999	0.936093	0.48033	0.118324	6.34744e-14	0.849791	0.381157	0.730571	0.695885
116	glycerate	433	TRUE	0.876478	0.104865	-0.0865602	-0.221004	-0.360549	0.0114462	-0.0457685	9.06262	-2.29022	0.302414	0.425758	0.49924	0.0228318	0.0157099	0.499567	5.72526e-10	0.0160887	0.533588	0.842397	0.69705
548	16-hydroxypalmitate	433	TRUE	-0.703259	-0.0953704	0.106763	-0.192517	-0.145157	0.0187172	-0.00464957	7.19959	-0.715889	0.363491	0.426321	0.360062	0.0294365	0.285505	0.22532	0.489269	0.0357365	0.830774	0.789545	0.69705
546	phenylalanyltryptophan	433	TRUE	-1.57577	0.108681	-0.0586732	-0.128505	0.120752	0.0220696	0.0155303	-0.939416	-5.0899	0.0757473	0.42914	0.660881	0.204886	0.438394	0.212423	0.0439662	0.811122	0.185091	0.910516	0.700382
7	X - 24243	433	TRUE	-0.474065	-0.117437	-0.0213078	0.336727	-0.114323	-0.000270018	0.0115195	0.00152424	-3.89576	0.624021	0.433148	0.883794	0.00230643	0.5009	0.988833	0.170437	0.999716	0.352076	0.966885	0.704195
274	alpha-tocopherol	433	TRUE	-2.10384	0.106348	-0.104782	0.115775	-0.0774906	0.0530719	-0.0164844	-2.06583	0.553334	0.0163089	0.43318	0.427399	0.247256	0.61443	0.00238461	0.0303104	0.594469	0.883964	0.810653	0.704195
596	1-stearyl-2-arachidonoyl-GPC (O-18:0/20:4)*	433	TRUE	0.750548	-0.107724	0.165561	0.124865	-0.0540619	-0.01939	0.00430055	5.66553	4.07913	0.398253	0.433835	0.216371	0.218625	0.728989	0.273926	0.577478	0.150057	0.288849	0.720701	0.704195
859	3-methylglutarylcarnitine (2)	433	TRUE	-1.12288	0.102215	0.0428281	-0.272688	0.720279	0.0218302	0.00105945	20.0042	0.672741	0.185064	0.436112	0.737353	0.00484227	1.29325e-06	0.196457	0.885567	9.8512e-08	0.854453	0.932804	0.706613
468	cis-4-decenoylcarnitine (C10:1)	433	TRUE	-0.944406	-0.104775	0.054133	0.154266	0.226771	0.0184095	7.4685e-05	-11.0019	-1.49344	0.27927	0.438427	0.680747	0.121846	0.139051	0.290357	0.992143	0.00444008	0.692641	0.913098	0.707831
57	succinimide	433	TRUE	1.1729	0.0956977	0.103047	0.589934	-0.060408	-0.0152733	-0.0236979	-3.68209	1.90043	0.141252	0.438445	0.391179	9.34864e-11	0.666152	0.336861	0.000624097	0.297198	0.581852	0.795359	0.707831
267	1-pentadecanoyl-2-linoleoyl-GPC (15:0/18:2)*	433	TRUE	-0.44333	0.0955282	0.0775329	-0.251592	-0.706475	0.0149821	-0.00207299	0.549173	-3.86589	0.581933	0.443791	0.522955	0.00623718	5.85947e-07	0.35094	0.767008	0.877654	0.267369	0.846475	0.714798
304	cholesterol	433	TRUE	-1.91177	0.108167	-0.175989	0.119331	-0.641388	0.0377953	0.0078244	2.50964	-5.81192	0.0362433	0.444355	0.200906	0.25252	6.31737e-05	0.0379333	0.323916	0.534907	0.141342	0.71718	0.714798
478	behenoyl dihydrosphingomyelin (d18:0/22:0)*	433	TRUE	-1.81191	-0.100096	0.0486672	0.0714038	-0.0590247	0.0120551	0.044487	-1.32675	-4.08475	0.0327599	0.446443	0.703611	0.461427	0.692084	0.476388	1.60871e-09	0.724179	0.266157	0.922678	0.716345
701	glutamate	433	TRUE	-3.05734	0.0852952	-0.0667789	0.686431	0.39268	0.0188711	0.06368	-4.29417	-6.2693	2.40784e-05	0.446916	0.540549	1.0394e-16	0.00201056	0.191267	4.32759e-24	0.180595	0.0454253	0.85147	0.716345
851	1-docosapentaenoyl-GPC (22:5n3)*	433	TRUE	-0.877471	0.0956706	-0.207102	0.414934	-0.0579237	0.0225173	-0.0133563	5.60237	-1.23544	0.281465	0.448436	0.0917065	8.26405e-06	0.685597	0.165874	0.0591889	0.120619	0.726092	0.627245	0.717498
69	sphingomyelin (d18:0/18:0, d19:0/17:0)*	433	TRUE	-1.9743	-0.0968499	-0.0250245	-0.128728	0.00907005	0.0129401	0.049886	0.105788	-0.995981	0.0171746	0.450498	0.841181	0.173807	0.950295	0.433631	4.21485e-12	0.977007	0.781226	0.961265	0.719512
425	1-stearoyl-2-oleoyl-GPS (18:0/18:1)	433	TRUE	-0.213774	-0.0986119	0.298695	-0.164393	-0.0155434	-0.00494761	0.0152149	-3.16904	-3.87606	0.801608	0.454339	0.0198491	0.0907564	0.917146	0.770639	0.0395695	0.400472	0.292563	0.44604	0.724356
841	sphingosine 1-phosphate	433	TRUE	1.2479	-0.101365	0.145847	0.21069	-0.229387	-0.0218446	-0.00653996	5.7537	-1.90335	0.155257	0.456147	0.27047	0.0356905	0.136866	0.212317	0.391321	0.139113	0.616521	0.739821	0.725947
713	4-allylphenol sulfate	433	TRUE	-0.446227	0.0950562	-0.0177153	0.184186	0.0233997	0.0200569	-0.0231195	1.45874	5.09365	0.59028	0.459062	0.887227	0.0517227	0.872273	0.225027	0.00132439	0.691142	0.155635	0.96831	0.72929
768	7-methylxanthine	433	TRUE	0.444024	0.0966023	-0.145715	0.151901	-0.208369	-0.00340334	-0.0067626	14.1321	0.943794	0.601409	0.463179	0.255409	0.117744	0.162761	0.840914	0.359849	0.000174863	0.797554	0.731074	0.734528
551	1,7-dimethylurate	433	TRUE	0.454238	0.0853285	0.0770289	0.135101	-0.180407	-0.00650726	-0.00198887	3.2384	-0.862648	0.549303	0.46777	0.500517	0.118996	0.175674	0.667159	0.762843	0.335238	0.792767	0.842397	0.739231
558	X - 14056	433	TRUE	-0.90224	0.0970629	0.0309593	0.147731	0.290674	-0.00631314	0.0376058	2.77671	-7.29201	0.295774	0.467795	0.811869	0.133985	0.0551092	0.713797	5.28976e-07	0.46765	0.0509154	0.960944	0.739231
100	N-acetylhistidine	433	TRUE	-0.114297	0.0885539	-0.197311	0.167107	-0.0890009	0.0131395	-0.0153401	12.1372	1.41246	0.885727	0.472293	0.0997781	0.0658753	0.523985	0.407527	0.0264263	0.000571616	0.68159	0.662222	0.743632
147	bilirubin (E,Z or Z,E)*	433	TRUE	-0.817072	0.0940933	0.0597986	0.307582	-0.0696861	0.0282782	-0.0233706	0.856151	-3.78247	0.334043	0.472696	0.639045	0.00145649	0.638978	0.093726	0.00147272	0.819276	0.301548	0.900729	0.743632
370	paraxanthine	433	TRUE	0.774165	0.091807	0.0446873	0.202243	-0.194417	-0.0102165	-0.00842678	-2.10116	-2.7778	0.348616	0.47307	0.719644	0.0320847	0.180154	0.535197	0.240321	0.56583	0.437189	0.923804	0.743632
705	arachidonoylcarnitine (C20:4)	433	TRUE	-0.561709	0.0892601	0.237813	0.972718	0.169337	0.00267746	0.000565811	4.70585	-2.86072	0.486054	0.474883	0.0503943	4.58972e-26	0.231784	0.867794	0.935635	0.187741	0.412443	0.548343	0.744721
480	nonanoylcarnitine (C9)	433	TRUE	-0.853354	-0.107793	0.180985	0.124514	0.117482	0.0210729	-0.00708994	-0.755112	1.97134	0.381436	0.475425	0.218127	0.263604	0.492634	0.278565	0.402634	0.861222	0.640419	0.721762	0.744721
358	androsterone glucuronide	433	TRUE	1.47676	0.0804849	-0.0473095	0.964207	0.162366	-0.0389872	-0.00123631	13.0545	-0.756076	0.0438495	0.47827	0.66838	1.052e-30	0.207011	0.0076397	0.846021	5.778e-05	0.811573	0.912651	0.747787
215	X - 07765	433	TRUE	-0.208152	0.0919844	-0.179326	0.461349	0.0765427	-0.0146305	0.0280773	-0.0259475	3.89516	0.804352	0.479787	0.156819	1.53883e-06	0.603975	0.382725	0.000120214	0.994439	0.284201	0.698593	0.747787
245	pantothenate	433	TRUE	-2.17844	0.0933957	-0.12939	0.142409	0.103709	0.0476013	-0.00577063	4.39617	0.724936	0.0106865	0.479886	0.314453	0.144069	0.488929	0.00516668	0.436407	0.244899	0.844409	0.767509	0.747787
309	sphingomyelin (d17:2/16:0, d18:2/15:0)*	433	TRUE	-3.02454	0.0813652	0.0444004	-0.435555	-0.356933	0.044779	0.036724	4.27684	-2.47931	4.94736e-05	0.480991	0.692676	3.12826e-07	0.0063922	0.00259523	1.42036e-08	0.195229	0.442182	0.916747	0.748088
256	imidazole propionate	433	TRUE	-1.78817	0.082594	-0.138191	0.59843	0.258804	0.0153048	0.0242598	-1.08068	1.74684	0.0183016	0.481749	0.226392	4.77875e-12	0.051838	0.311347	0.000229512	0.747555	0.594385	0.730571	0.748088
185	perfluorooctanesulfonate (PFOS)	433	TRUE	-3.06691	0.0859458	-0.00346557	0.742691	0.239929	0.0656895	-0.0169259	0.179342	3.62493	0.0001111	0.48445	0.976885	2.54899e-16	0.0851242	3.32291e-05	0.0140916	0.959313	0.291259	0.986869	0.750981
631	aconitate [cis or trans]	433	TRUE	-0.932951	0.0896936	0.0156114	-0.0811131	0.365112	0.00663762	0.0172391	6.32184	-5.8411	0.262177	0.486521	0.900938	0.393468	0.0124676	0.689211	0.017101	0.0863456	0.104844	0.973544	0.75289
276	octanoylcarnitine (C8)	433	TRUE	-0.634711	-0.0956981	0.0525509	0.0149392	0.277583	0.0237778	-0.0174131	-6.89483	0.904382	0.477163	0.489016	0.696186	0.883556	0.0766845	0.18185	0.0247962	0.0813234	0.814981	0.919396	0.754085
269	N-acetylalanine	433	TRUE	-0.496922	0.09728	-0.0566963	0.123244	0.112657	-0.00788808	0.030931	5.75553	8.57285	0.584556	0.489618	0.678983	0.235233	0.480313	0.663493	8.97426e-05	0.152891	0.0293244	0.912651	0.754085
619	branched-chain, straight-chain, or cyclopropyl 12:1 fatty acid*	433	TRUE	0.296344	-0.0883761	0.163413	-0.256583	-0.103581	-0.0025423	-0.00248209	-0.682405	2.5555	0.719791	0.489819	0.189387	0.00654954	0.475235	0.877384	0.729484	0.85208	0.474803	0.708224	0.754085
291	acetylcarnitine (C2)	433	TRUE	-1.41004	0.095832	-0.0174388	0.077916	-0.0237411	0.0297212	-0.00361582	-2.668	-6.00643	0.120832	0.496136	0.898716	0.453033	0.881769	0.101159	0.647071	0.507618	0.126852	0.972523	0.762501
314	N1-methyladenosine	433	TRUE	-2.42893	0.0851267	-0.131133	0.327022	0.314737	0.0330149	0.0237047	10.7564	9.3482	0.00268316	0.497056	0.282288	0.000403371	0.0267667	0.0408016	0.000746944	0.00269386	0.00760563	0.743913	0.762607
162	3-hydroxydecanoate	433	TRUE	-0.552012	-0.0905158	0.171887	0.0152528	-0.0346633	0.0132669	-0.00447728	-4.93599	1.157	0.522117	0.498076	0.18607	0.876963	0.818971	0.440576	0.550168	0.196384	0.756605	0.708224	0.76261
711	lysine	433	TRUE	-0.877694	0.0898701	0.00111484	0.240126	0.292607	0.00292112	0.0226807	-0.16957	-3.78994	0.306113	0.49876	0.993119	0.0142481	0.052045	0.864415	0.00233671	0.964402	0.307287	0.994229	0.76261
700	glycosyl-N-stearoyl-sphingosine (d18:1/18:0)	433	TRUE	-1.43011	0.0889542	-0.0391056	-0.411327	-0.400675	0.0411816	-0.0105171	-1.83377	-5.4984	0.0956338	0.503439	0.76242	2.72273e-05	0.00784996	0.0161438	0.158418	0.629584	0.138836	0.938722	0.767323
51	1-stearoyl-2-dihomo-linolenoyl-GPE (18:0/20:3n3 or 6)*	433	TRUE	-1.1316	0.0874876	-0.0994712	-0.0911158	0.295652	0.00511398	0.0330219	3.64911	-6.41219	0.180144	0.503556	0.434429	0.344815	0.0461551	0.761386	6.74865e-06	0.329264	0.0793302	0.810653	0.767323
738	6-oxopiperidine-2-carboxylate	433	TRUE	0.762069	-0.0902995	0.0250363	-0.094933	0.158236	-0.0137473	-0.000996972	5.12445	9.33719	0.384573	0.506004	0.84969	0.34305	0.303933	0.431664	0.89584	0.186914	0.0138467	0.961265	0.768599
217	succinate	433	TRUE	0.898121	-0.0853787	-0.0671457	-7.32564e-05	0.144293	-0.0178109	-0.00278215	-0.467419	-0.190434	0.27927	0.506724	0.59151	0.999384	0.322271	0.282073	0.699687	0.898859	0.957732	0.873449	0.768599
659	3,5-dichloro-2,6-dihydroxybenzoic acid	433	TRUE	-2.13999	-0.0785689	-0.166323	0.164358	0.174904	0.0104173	0.0522691	4.52233	-0.882797	0.0051939	0.507745	0.149569	0.0602561	0.193381	0.495217	3.95717e-15	0.182496	0.789971	0.694084	0.768599
380	branched-chain fatty acid 18:0 (2)**	433	TRUE	0.924967	0.0954092	-0.0234963	0.155076	0.138878	-0.0168538	-0.00520106	-8.28582	-3.1394	0.319944	0.507824	0.866888	0.144393	0.395159	0.36361	0.519809	0.0443226	0.435477	0.963954	0.768599
332	androsterone sulfate	433	TRUE	1.37392	0.0825688	-0.231838	0.571274	0.239039	-0.0239375	-0.0156781	-4.22951	-11.8104	0.0897594	0.510409	0.0575125	6.59929e-10	0.0927901	0.138354	0.0258624	0.238416	0.00075321	0.560121	0.770712
277	X - 24748	433	TRUE	0.0684158	0.0841282	-0.0166874	0.0281033	-0.00435925	0.00816284	-0.0157362	-12.0622	0.907102	0.934073	0.511429	0.893515	0.766127	0.976057	0.620748	0.0285394	0.000994754	0.799974	0.970832	0.770712
128	X - 23641	433	TRUE	0.272878	-0.0833871	-0.0215242	0.634389	0.629634	-0.0187842	0.0129578	6.98715	-0.168052	0.739455	0.511801	0.861835	1.30532e-11	1.24504e-05	0.251087	0.0691283	0.0545832	0.96226	0.963954	0.770712
135	X - 13553	433	TRUE	-1.2041	0.0810547	-0.0765136	0.207117	0.0229842	0.0245214	-0.00270651	1.08519	3.23529	0.134434	0.515414	0.528021	0.0242082	0.870759	0.126463	0.698588	0.760743	0.352812	0.846475	0.774682
0	linoleoyl ethanolamide	433	TRUE	-1.02263	-0.0849564	0.295088	-0.100305	-0.406013	0.00921431	0.02032	3.40933	-1.64345	0.22601	0.516166	0.020463	0.298566	0.0061989	0.584453	0.00562716	0.362249	0.65307	0.44604	0.774682
518	X - 23636	433	TRUE	-2.08412	-0.0867925	0.18548	0.113883	0.112516	0.0432539	-0.0101635	-3.25071	-5.95238	0.0161396	0.517814	0.155483	0.249848	0.459572	0.0123126	0.176942	0.397004	0.112433	0.698593	0.775855
347	X - 16964	433	TRUE	-1.52924	0.0801078	0.105454	0.483302	0.0450199	0.0314184	-0.00310422	-0.360623	-1.4606	0.0569501	0.51975	0.383796	1.39007e-07	0.749636	0.0499067	0.656502	0.919287	0.674443	0.795359	0.776585
561	X - 11795	433	TRUE	-0.534592	0.0818219	-0.0686231	0.306111	0.140747	0.0139582	-0.0106712	6.4093	-3.10854	0.514976	0.520035	0.57924	0.00110008	0.32901	0.394061	0.134694	0.0780635	0.381753	0.866443	0.776585
328	beta-cryptoxanthin	433	TRUE	1.88367	0.0791559	0.137969	-0.222554	-0.126677	0.0021756	-0.0671119	-11.034	-0.508275	0.0179829	0.521007	0.25027	0.014407	0.364935	0.891035	2.96753e-22	0.00175813	0.882746	0.731074	0.776743
433	androstenediol (3alpha, 17alpha) monosulfate (2)	433	TRUE	1.06708	-0.074204	0.181589	0.683432	0.114712	-0.0372391	0.0127847	9.63561	-3.57756	0.157643	0.525885	0.110642	2.33491e-15	0.387058	0.0134294	0.0513594	0.00397514	0.273749	0.668546	0.781817
828	oleoylcarnitine (C18:1)	433	TRUE	-1.16263	0.0810318	0.157835	0.43166	-0.252029	0.030323	-0.0145329	-0.444776	-5.20504	0.158855	0.526156	0.204457	4.67099e-06	0.0820171	0.0654445	0.0426694	0.903165	0.145053	0.717735	0.781817
772	4-ethylphenylsulfate	433	TRUE	-0.043594	0.079972	-0.0201688	0.0950898	-0.0163584	0.0174881	-0.0291436	4.24538	1.19483	0.957889	0.531784	0.871249	0.313352	0.910171	0.28827	4.85066e-05	0.245763	0.73812	0.963954	0.788872
446	palmitoyl-sphingosine-phosphoethanolamine (d18:1/16:0)	433	TRUE	0.419731	-0.0830327	-0.208261	-0.0408559	-0.32716	0.00430127	-0.0188655	-4.78087	-0.74032	0.625155	0.532707	0.107785	0.677205	0.0301312	0.80182	0.0114951	0.209081	0.842203	0.668546	0.788934
777	undecenoylcarnitine (C11:1)	433	TRUE	0.091936	0.0801091	0.100474	0.442945	-0.159376	-0.0033758	-0.00286514	-0.222395	-1.7837	0.91189	0.533674	0.42238	3.05893e-06	0.274708	0.838591	0.691448	0.951821	0.619908	0.807886	0.789063
526	N1-methylinosine	433	TRUE	-0.634975	0.0785754	-0.112638	0.336091	0.189219	-0.0130619	0.0387815	5.94577	0.309957	0.437847	0.535432	0.36122	0.000324843	0.188024	0.423659	4.93829e-08	0.101045	0.93028	0.789545	0.78954
621	tricosanoyl sphingomyelin (d18:1/23:0)*	433	TRUE	-1.64159	0.0815856	-0.0969428	-0.0603787	-0.479849	0.0360372	0.000797933	-2.04398	-2.20835	0.0535828	0.535759	0.449517	0.534303	0.00131497	0.0336485	0.914011	0.587485	0.548588	0.825343	0.78954
2	X - 16397	433	TRUE	-2.07231	0.076694	-0.0690814	0.216323	0.069531	0.0382709	0.00678444	9.09406	-0.566223	0.00976648	0.537029	0.567682	0.0182182	0.621535	0.0167411	0.330245	0.0104803	0.870432	0.86214	0.790111
718	X - 24328	433	TRUE	1.46274	-0.0715097	0.0814083	0.771507	0.0680784	-0.0350109	-0.00193699	6.85182	1.24338	0.0531943	0.541785	0.475323	4.4095e-19	0.608398	0.0203481	0.768261	0.040936	0.704194	0.838218	0.795802
342	taurocholate	433	TRUE	0.393113	-0.0796699	-0.0747635	0.103754	0.0550812	-0.0166783	0.0121501	1.58279	2.85493	0.642018	0.543074	0.557503	0.28281	0.710714	0.322777	0.0981986	0.672665	0.435411	0.86214	0.796391
108	sphingomyelin (d18:2/23:1)*	433	TRUE	-1.61018	-0.0738059	0.00773511	-0.509284	-0.492796	0.0186376	0.0327844	2.15426	-0.598171	0.0412798	0.545966	0.948144	1.60399e-08	0.000376083	0.236344	1.7352e-06	0.537711	0.860969	0.98583	0.79827
674	X - 16935	433	TRUE	0.633389	-0.0784455	-0.0893118	0.155043	0.214946	-0.0351801	0.034719	-22.8279	-5.17378	0.450284	0.546138	0.480043	0.10574	0.144615	0.0355417	1.91049e-06	8.17006e-10	0.154259	0.838218	0.79827
692	decanoylcarnitine (C10)	433	TRUE	-0.104289	-0.0828714	0.0465733	-0.0279387	0.265147	0.0168426	-0.0230083	-4.8747	2.18398	0.906794	0.54812	0.728674	0.783648	0.0900736	0.343154	0.00294973	0.216712	0.571085	0.926088	0.799862
357	X - 24699	433	TRUE	-1.59736	0.0721565	-0.245492	0.871986	0.0419359	0.0340528	-0.0128987	10.3457	6.8879	0.040619	0.550499	0.0368401	1.32488e-22	0.759555	0.0286602	0.0570699	0.00276095	0.0413905	0.507827	0.801454
727	oleoyl-oleoyl-glycerol (18:1/18:1) [1]*	433	TRUE	-1.5577	0.0789059	-0.127251	0.252174	0.326159	0.0152573	0.0281748	6.66885	-11.1216	0.0682285	0.551	0.32302	0.00976369	0.0296983	0.370574	0.000147072	0.0780435	0.00263165	0.776962	0.801454
765	dihomo-linolenate (20:3n3 or n6)	433	TRUE	-1.81167	-0.0780961	0.18504	-0.259547	-0.0611679	0.01866	0.0320388	10.0254	-0.721809	0.0328101	0.55256	0.148093	0.0074351	0.681554	0.270409	1.39762e-05	0.00767421	0.844249	0.694084	0.802421
25	S-adenosylhomocysteine (SAH)	433	TRUE	-0.769005	0.0710734	-0.05193	0.619027	0.151145	0.00101826	0.0218539	1.4463	-2.46803	0.322775	0.555255	0.657783	3.23147e-12	0.268471	0.947667	0.00122083	0.674663	0.463485	0.910309	0.802486
264	6-hydroxyindole sulfate	433	TRUE	-0.116527	0.0816521	-0.0605978	0.19092	0.365972	0.00741385	-0.0116386	1.02921	2.7837	0.896374	0.555784	0.653184	0.06177	0.0198502	0.677833	0.134354	0.795127	0.472268	0.906994	0.802486
219	cysteine s-sulfate	433	TRUE	0.312244	0.0818147	0.252152	0.305503	0.0369241	-0.000376088	-0.0111695	17.2776	-1.77179	0.7283	0.556821	0.062724	0.00292758	0.815051	0.983265	0.152662	1.43222e-05	0.648823	0.585424	0.802486
750	stearidonate (18:4n3)	433	TRUE	-0.423133	0.0764163	0.267711	-0.361877	0.00383277	0.00799523	0.00221073	9.77714	3.83815	0.615268	0.557953	0.0349005	0.000168286	0.97932	0.634026	0.7625	0.00876161	0.292264	0.504368	0.802486
97	3-hydroxyhippurate	433	TRUE	0.587202	0.0793085	-0.0238375	-0.144331	0.185785	-0.00874153	-0.00554824	-1.31868	-5.60769	0.502966	0.559228	0.856839	0.149529	0.227531	0.617145	0.466366	0.734204	0.139459	0.963954	0.802486
749	sphingomyelin (d18:1/20:0, d16:1/22:0)*	433	TRUE	-2.52931	-0.0770599	-0.0658264	-0.0200836	-0.476658	0.0473665	0.0125561	0.365458	-0.923447	0.00319656	0.562041	0.610728	0.837637	0.00155816	0.00564282	0.0921031	0.923399	0.803618	0.878823	0.802486
538	X - 15469	433	TRUE	-0.111089	0.0736795	0.350861	0.626946	-0.0968159	0.0103863	-0.0243249	-2.17306	-1.26453	0.892711	0.563636	0.00471158	2.68122e-11	0.503292	0.52727	0.00067634	0.55149	0.722825	0.406376	0.802486
10	diacylglycerol (16:1/18:2 [2], 16:0/18:3 [1])*	433	TRUE	-2.20027	0.0746897	0.0242193	0.0910127	0.289231	0.0143754	0.0522925	4.22591	-8.26764	0.00856048	0.564541	0.847745	0.341111	0.0490763	0.389159	6.41073e-13	0.254369	0.0224709	0.961265	0.802486
649	maltose	433	TRUE	-1.46618	-0.0729311	0.0727093	-0.136667	0.0238326	0.0172134	0.0192812	-4.3566	-4.58221	0.073092	0.564965	0.555422	0.143634	0.868246	0.291487	0.00667552	0.229333	0.195656	0.86214	0.802486
539	X - 17351	433	TRUE	-0.368926	-0.0698451	0.193756	-0.0645979	-0.112892	0.0251673	-0.0277398	-2.83341	7.2996	0.639197	0.566682	0.102364	0.472402	0.413997	0.10886	4.96923e-05	0.416369	0.0321122	0.662222	0.802486
426	stachydrine	433	TRUE	1.69542	0.0745926	0.00469003	-0.0253493	-0.0366411	-0.0216302	-0.0212746	-4.32307	-0.178589	0.0442233	0.567721	0.970545	0.792298	0.804449	0.198151	0.00366459	0.246863	0.96095	0.986869	0.802486
858	X - 24546	433	TRUE	0.585384	-0.0686749	0.257859	0.617696	-0.0883111	-0.0242137	0.00971124	-7.55909	-6.88079	0.45229	0.569231	0.0280583	3.85551e-12	0.518513	0.119097	0.151277	0.0284711	0.041251	0.453492	0.802486
640	ornithine	433	TRUE	-0.765646	0.0743976	-0.00236506	0.512396	-0.0479156	0.010814	0.00434379	6.56279	-4.84238	0.364189	0.56924	0.985164	1.06191e-07	0.746426	0.520541	0.553519	0.0791488	0.184892	0.988473	0.802486
880	X - 21410	433	TRUE	0.386088	0.0699173	0.269273	0.630755	0.0630081	-0.0214635	0.013314	-2.94198	-5.43651	0.626558	0.569493	0.0243596	3.44011e-12	0.651156	0.175074	0.0534645	0.402643	0.113453	0.44604	0.802486
137	adenine	433	TRUE	-3.51924	0.0858302	-0.111406	0.0813824	-0.0735229	0.0501557	0.0387067	4.43408	-1.45034	0.000303829	0.56959	0.4481	0.464676	0.667424	0.00985955	4.82582e-06	0.304302	0.730924	0.825343	0.802486
368	histidine	433	TRUE	0.821914	-0.0666961	0.183423	-0.17246	-0.116617	-0.00490138	-0.0164492	2.68841	2.50351	0.278142	0.569978	0.108349	0.0463766	0.380932	0.74577	0.0124899	0.423303	0.445373	0.668546	0.802486
345	sphinganine-1-phosphate	433	TRUE	0.901558	-0.0744008	0.147343	-0.0209886	-0.334998	-0.0144013	-0.0029681	3.66393	-2.95201	0.286845	0.570461	0.248171	0.828172	0.0242291	0.393709	0.686541	0.32856	0.420433	0.731074	0.802486
4	13-HODE + 9-HODE	433	TRUE	0.312976	0.0701719	0.117759	-0.419653	-0.0859634	0.00449196	-0.0157193	8.49904	-7.00269	0.695413	0.570952	0.328415	4.31986e-06	0.54032	0.778167	0.0236254	0.0164013	0.0429916	0.780974	0.802486
598	androstenediol (3beta,17beta) disulfate (2)	433	TRUE	0.604922	0.0668662	0.234234	0.876869	0.122137	-0.0325916	0.0184247	1.62039	-8.26542	0.427809	0.571533	0.0416501	8.16737e-24	0.361963	0.032213	0.0054422	0.631623	0.0123133	0.531112	0.802486
249	citrate	433	TRUE	-0.807624	-0.0764474	0.0467256	-0.242642	0.104889	0.0216436	-0.00759555	4.09832	-0.110973	0.354656	0.571689	0.722384	0.0149228	0.493664	0.213668	0.316406	0.289051	0.97656	0.923804	0.802486
181	1-oleoyl-2-dihomo-linoleoyl-GPC (18:1/20:2)*	433	TRUE	0.651309	0.0802385	-0.00515191	-0.122494	-0.36245	0.0103022	-0.0397146	-8.43915	-6.26327	0.477524	0.57217	0.970266	0.242258	0.0244024	0.573267	6.20544e-07	0.0377647	0.114565	0.986869	0.802486
113	glutamine	433	TRUE	-1.19766	-0.0728124	0.0320341	0.333693	-0.15247	0.0362703	-0.0217395	5.80912	1.37293	0.150205	0.572309	0.798479	0.000449519	0.29695	0.02893	0.00264883	0.115196	0.70317	0.953916	0.802486
514	1-stearoyl-2-docosapentaenoyl-GPC (18:0/22:5n3)*	433	TRUE	0.112503	-0.0744848	-0.190498	0.259198	0.227994	-0.00691164	0.00639733	4.82278	-1.33531	0.895143	0.573244	0.138716	0.00785896	0.128286	0.684795	0.38838	0.202196	0.7178	0.68686	0.802542
301	methylsuccinate	433	TRUE	0.270502	-0.0702291	0.0899924	0.0209716	0.200748	-0.00281436	-0.00485279	5.3981	-2.42167	0.737667	0.574566	0.459743	0.820183	0.15695	0.861313	0.489211	0.131365	0.48847	0.831454	0.803137
870	octadecenedioylcarnitine (C18:1-DC)*	433	TRUE	-0.956889	-0.0730425	0.143409	0.336202	-0.217082	0.0157966	-0.000378201	3.3525	-2.22869	0.259181	0.578226	0.261914	0.000519979	0.144962	0.350402	0.959066	0.372228	0.543766	0.731074	0.805835
465	fumarate	433	TRUE	1.1352	0.0723948	0.0814922	0.148571	0.0992781	-0.00991061	-0.0297791	7.38562	0.205216	0.176914	0.578295	0.520162	0.121867	0.501312	0.554523	4.56656e-05	0.047367	0.955028	0.846475	0.805835
682	behenoyl sphingomyelin (d18:1/22:0)*	433	TRUE	-2.31108	-0.0729512	-0.15156	0.153674	-0.481878	0.0448185	0.00836767	-0.735755	0.511289	0.00665446	0.580302	0.237742	0.114215	0.00127365	0.00833325	0.258139	0.845389	0.88969	0.731074	0.807377
697	phosphate	433	TRUE	-1.85709	0.0796498	-0.055976	-0.284227	-0.111223	0.0483489	-0.0131271	5.1425	1.19861	0.046777	0.581987	0.690922	0.0077259	0.497727	0.00945545	0.105756	0.213943	0.766868	0.916747	0.808466
853	oleoyl-linoleoyl-glycerol (18:1/18:2) [1]	433	TRUE	-1.02745	-0.0701654	-0.161506	0.381011	0.317024	0.00192217	0.0304057	-2.22842	-12.3116	0.212958	0.582976	0.193995	5.27821e-05	0.0286523	0.907009	2.21536e-05	0.542035	0.000565117	0.708224	0.808586
819	X - 13431	433	TRUE	0.746844	0.0717946	0.0855272	0.48117	-0.0748888	-0.0154003	-0.00770864	12.0099	3.34554	0.379339	0.585392	0.504193	7.12482e-07	0.615703	0.363459	0.296337	0.00141777	0.362936	0.842397	0.810682
495	dodecadienoate (12:2)*	433	TRUE	-0.117479	-0.0672167	0.0874405	0.0565327	-0.0307698	0.00318982	-0.00273352	-8.22247	-2.42848	0.884149	0.59046	0.47182	0.539353	0.827964	0.842775	0.696381	0.0213338	0.486512	0.838218	0.816438
299	3-bromo-5-chloro-2,6-dihydroxybenzoic acid*	433	TRUE	-2.09647	-0.0654001	-0.101958	0.137857	-0.0137481	0.0194031	0.0360606	7.04896	1.08181	0.00813032	0.594068	0.393149	0.127657	0.921277	0.219454	1.61174e-07	0.0445772	0.752377	0.795359	0.820161
453	palmitoleate (16:1n7)	433	TRUE	-1.44009	0.0639868	0.25844	-0.741451	-0.203539	0.0243797	0.0172793	11.3454	-2.74556	0.0655464	0.597374	0.0283433	1.04526e-16	0.13833	0.118075	0.0109898	0.00105763	0.417311	0.453492	0.821383
126	glycerol	433	TRUE	-1.01712	0.0616118	0.0780842	-0.788278	0.0123345	0.0104828	0.0274642	4.02037	2.661	0.177394	0.597906	0.4921	5.66544e-20	0.925793	0.485859	2.76892e-05	0.228812	0.414937	0.842397	0.821383
847	palmitoylcarnitine (C16)	433	TRUE	-1.62042	0.0672325	0.171023	0.595543	-0.00190858	0.0239059	0.0083687	-0.201514	-4.74359	0.0492325	0.598397	0.168513	2.50368e-10	0.989477	0.145814	0.242441	0.955977	0.183524	0.704927	0.821383
874	glycochenodeoxycholate glucuronide (1)	433	TRUE	1.24453	0.0670516	0.0979869	0.451411	0.0969987	-0.0374456	0.00909171	-0.359995	-0.938719	0.130143	0.598619	0.429182	1.54296e-06	0.501768	0.0224296	0.203178	0.921279	0.791978	0.810653	0.821383
620	(16 or 17)-methylstearate (a19:0 or i19:0)	433	TRUE	-0.53839	0.0684462	0.294726	-0.299415	-0.216894	0.00453825	0.0104648	11.6036	1.555	0.524156	0.601171	0.0207083	0.00193019	0.143984	0.787803	0.154188	0.00194395	0.670831	0.44604	0.823622
240	X - 21796	433	TRUE	0.974565	0.0650538	0.0980435	0.790956	-0.136736	-0.0113532	-0.0235434	3.95601	0.942606	0.230155	0.605118	0.423197	1.52789e-17	0.337727	0.48343	0.000848974	0.27156	0.7886	0.807886	0.827546
891	linoleate (18:2n6)	433	TRUE	-0.828064	-0.0638911	0.189603	-0.379087	-0.22451	0.0101704	0.0152478	0.789585	-3.87324	0.30114	0.606558	0.116251	3.41875e-05	0.110419	0.524341	0.0284302	0.823887	0.26385	0.677913	0.827546
530	arachidoylcarnitine (C20)*	433	TRUE	-1.11946	0.0597192	0.00569966	0.643176	-0.0603545	0.0421953	-0.0412057	-3.76325	-4.42791	0.135119	0.60687	0.959746	5.69832e-14	0.646441	0.00475028	2.45213e-10	0.256876	0.172128	0.986869	0.827546
784	laurylcarnitine (C12)	433	TRUE	-1.28637	-0.06903	0.0929754	0.240243	0.0120052	0.0346968	-0.0162114	-2.56635	0.479957	0.138379	0.607729	0.477353	0.0154107	0.937233	0.045094	0.0316091	0.504572	0.898361	0.838218	0.827546
824	phenylacetylglutamine	433	TRUE	-0.864584	0.062905	0.0927118	0.0336948	0.135757	0.0238804	-0.0098689	4.9075	7.17713	0.276864	0.609557	0.439175	0.710667	0.330938	0.132143	0.153141	0.163562	0.0370344	0.814701	0.827773
275	butyrylcarnitine (C4)	433	TRUE	-1.96915	0.0696866	0.000176645	-0.00147832	0.381702	0.0226993	0.0293877	-0.88954	-7.32074	0.0256327	0.610175	0.99894	0.988298	0.0137669	0.197147	0.000126452	0.819986	0.0552641	0.99894	0.827773
666	1-stearoyl-2-docosahexaenoyl-GPE (18:0/22:6)*	433	TRUE	-0.329536	0.0725223	-0.165655	-0.150856	0.453825	0.00686824	0.00215297	-3.34753	0.333487	0.720739	0.611574	0.233196	0.152008	0.00505983	0.708768	0.78809	0.412408	0.933395	0.730571	0.827773
537	1-(1-enyl-stearoyl)-GPE (P-18:0)*	433	TRUE	-0.78015	0.0639125	-0.273176	0.232233	-0.106882	0.0204765	-0.0126207	-4.50991	-5.08436	0.336934	0.611591	0.0257013	0.0123444	0.453804	0.206408	0.0738035	0.210215	0.148245	0.44604	0.827773
278	androstenediol (3alpha, 17alpha) monosulfate (3)	433	TRUE	1.13695	-0.055977	0.00581703	0.938802	0.131085	-0.0323901	0.000614022	-4.35377	-9.48643	0.111684	0.613179	0.956941	1.35981e-30	0.296353	0.0230987	0.921242	0.169157	0.0021681	0.986869	0.828671
381	X - 14939	433	TRUE	0.168803	0.0612914	0.0678289	0.262931	0.0892483	-0.00495748	-0.000350305	-22.4122	-3.62216	0.831087	0.617103	0.569599	0.00363264	0.520757	0.753478	0.959368	1.62955e-10	0.290314	0.86214	0.832437
8	X - 11442	433	TRUE	-0.570406	0.0647596	0.0109642	0.427055	-0.0877118	0.020247	-0.0198754	-0.797201	-2.91467	0.496	0.617824	0.930817	8.13005e-06	0.551109	0.225716	0.00633029	0.829947	0.421586	0.982346	0.832437
572	1-docosahexaenoyl-GPC (22:6)*	433	TRUE	-0.153357	0.0644553	-0.144724	0.230458	-0.0512948	0.0302211	-0.0499972	-0.091753	2.63472	0.855199	0.620523	0.253231	0.0163699	0.728167	0.0714087	7.52413e-12	0.980338	0.468874	0.731074	0.834163
149	3-indoleglyoxylic acid	433	TRUE	-0.329487	0.0667617	0.00357386	0.512661	-0.0913626	0.0142862	-0.0203078	8.2604	4.70733	0.705752	0.621416	0.978324	2.71145e-07	0.551079	0.411811	0.00739994	0.0326284	0.212693	0.986869	0.834163
32	methyl glucopyranoside (alpha + beta)	433	TRUE	1.54053	0.0644005	0.104754	-0.13104	0.120595	-0.00731996	-0.0425868	4.10075	-3.27751	0.0682291	0.622668	0.410725	0.17454	0.416325	0.664019	6.56807e-09	0.273235	0.370114	0.801319	0.834163
787	gamma-CEHC	433	TRUE	-0.199598	-0.0651215	-0.0740355	0.148411	0.225872	-0.00585122	0.0136302	0.956607	3.50388	0.815805	0.623709	0.566487	0.129475	0.133351	0.732093	0.0671323	0.801041	0.344804	0.86214	0.834163
236	gamma-glutamyltryptophan	433	TRUE	-1.86071	0.0648397	0.246693	0.500927	-0.225721	0.014049	0.0330195	8.70856	-5.70817	0.0292068	0.62376	0.0551007	2.76249e-07	0.131987	0.409127	8.43808e-06	0.0212371	0.122225	0.554721	0.834163
272	1-palmityl-GPC (O-16:0)	433	TRUE	0.396273	0.0619267	-0.160603	0.252783	-0.174214	0.00382608	-0.0240992	3.44244	-3.53798	0.628589	0.625581	0.193396	0.00691262	0.225938	0.81488	0.000710191	0.342879	0.318417	0.708224	0.835123
374	gamma-glutamyl-alpha-lysine	433	TRUE	-1.79836	0.0660241	-0.00939615	0.432749	0.167683	0.0186251	0.0246127	-0.839714	-0.729117	0.0403855	0.627122	0.943356	1.57651e-05	0.276464	0.287208	0.00124343	0.828956	0.847748	0.98583	0.835123
206	X - 18899	433	TRUE	0.699974	-0.0625365	0.0344093	0.0403002	-0.104237	0.00380104	-0.0300561	-7.62572	3.43692	0.400213	0.627567	0.783813	0.67159	0.475646	0.818859	3.22028e-05	0.0385767	0.339954	0.943664	0.835123
645	3-hydroxybutyrate (BHBA)	433	TRUE	-0.225707	-0.064918	0.0037419	-0.0534592	-0.291847	0.0157029	-0.0163448	2.51381	-4.22405	0.79423	0.628206	0.977114	0.58867	0.0548128	0.36298	0.0297207	0.512018	0.259455	0.986869	0.835123
28	maleate	433	TRUE	-0.166012	0.0665909	-0.0238419	0.108746	0.363434	0.00150544	0.000596114	3.76607	2.44281	0.853483	0.632519	0.860327	0.289627	0.0213292	0.933091	0.939164	0.344324	0.530137	0.963954	0.83961
193	oleoyl-linoleoyl-glycerol (18:1/18:2) [2]	433	TRUE	-1.2818	-0.0618	-0.142751	0.355431	0.246332	0.00647832	0.0332108	-1.28781	-10.7575	0.127701	0.635449	0.260402	0.000217871	0.0955442	0.699535	5.56669e-06	0.729765	0.00314339	0.731074	0.842162
237	N-acetylglutamate	433	TRUE	-0.449854	0.0607254	-0.0910575	-0.38795	0.16758	-0.0057128	0.0316597	-0.149035	4.35816	0.587374	0.636321	0.466178	4.19558e-05	0.249713	0.72974	1.10607e-05	0.967631	0.224549	0.835391	0.842162
420	pentadecanoate (15:0)	433	TRUE	-0.865713	-0.0615853	0.307844	-0.341953	-0.248451	0.0129193	0.012547	9.99279	-0.258214	0.306007	0.638309	0.0157397	0.000401102	0.0943695	0.443778	0.0877366	0.00765202	0.943767	0.43441	0.843547
844	1-palmitoylglycerol (16:0)	433	TRUE	0.438954	0.0681922	-0.270976	-0.0628621	-0.151822	-0.0105463	0.00412602	-8.92489	3.71108	0.64227	0.641331	0.0571092	0.560346	0.360264	0.575808	0.615293	0.0330147	0.364249	0.560121	0.846293
418	1-palmityl-2-linoleoyl-GPC (O-16:0/18:2)*	433	TRUE	1.84818	0.0589356	-0.178856	-0.0715173	-0.275135	-0.00958008	-0.0460254	-5.01866	2.37694	0.0247835	0.644028	0.149528	0.447035	0.0570633	0.559671	1.24489e-10	0.168853	0.504796	0.694084	0.848533
829	hexanoylglutamine	433	TRUE	-0.859734	0.0612132	-0.159503	0.0671564	-0.135998	0.016781	0.00404946	-0.713732	0.226952	0.317225	0.645738	0.218301	0.494044	0.367646	0.327727	0.587689	0.85133	0.951362	0.721762	0.848533
470	X - 17653	433	TRUE	-0.00158305	-0.0610181	0.0278319	0.489987	0.171451	-0.00851812	0.00727244	-15.9274	-1.69247	0.99853	0.646737	0.829889	6.01868e-07	0.255987	0.619277	0.330118	2.87516e-05	0.649148	0.961265	0.848533
503	dihomo-linolenoylcarnitine (C20:3n3 or 6)*	433	TRUE	-0.988461	0.0586478	0.20015	0.71894	0.0262431	0.00869771	0.00924347	2.9198	-3.38965	0.231575	0.646817	0.108038	2.60347e-14	0.856483	0.597689	0.197907	0.425076	0.343254	0.668546	0.848533
798	beta-citrylglutamate	433	TRUE	-1.74719	-0.0598501	0.185744	-0.150998	0.0716893	0.026	0.015271	6.148	-13.6358	0.0415331	0.652218	0.150575	0.123099	0.633939	0.128381	0.0403398	0.105481	0.000238022	0.694084	0.852284
533	1-(1-enyl-oleoyl)-2-docosahexaenoyl-GPE (P-18:1/22:6)*	433	TRUE	1.13733	0.0580146	-0.276949	0.0451392	0.0969626	0.00654691	-0.0536131	-10.2049	2.08931	0.171333	0.652404	0.0271119	0.634613	0.50665	0.69302	1.15853e-13	0.00559708	0.561547	0.453492	0.852284
294	5alpha-androstan-3beta,17alpha-diol disulfate	433	TRUE	0.109489	0.0566534	0.0455069	0.645875	0.0442688	0.0131677	-0.0323034	6.47477	0.373721	0.892986	0.65319	0.710678	3.74242e-12	0.756778	0.417318	4.92431e-06	0.0725424	0.915517	0.922678	0.852284
238	cysteinylglycine	433	TRUE	1.65096	-0.0605708	0.32525	0.382353	0.272471	-0.0296967	-0.0126155	7.47317	3.96626	0.0580139	0.653481	0.0132289	0.000121583	0.0748502	0.0873823	0.0954996	0.052769	0.292764	0.423324	0.852284
856	glyco-beta-muricholate**	433	TRUE	0.789228	0.0598191	0.360599	-0.0652762	-0.0264494	-0.00965163	-0.0136569	2.48123	5.27126	0.360676	0.654711	0.00559239	0.508104	0.861527	0.575205	0.0686932	0.516556	0.158412	0.406376	0.852647
127	pro-hydroxy-pro	433	TRUE	-2.57394	0.0594225	-0.159685	0.118909	0.395885	0.0501048	-0.00067553	7.50682	3.67381	0.00302267	0.658545	0.222266	0.230453	0.0094022	0.00380466	0.928627	0.0509187	0.328161	0.724182	0.854925
315	4-methylcatechol sulfate	433	TRUE	0.464999	-0.0624027	0.0999173	-0.0588909	0.031333	-0.00094177	-0.0141519	2.49128	3.96515	0.610797	0.659299	0.468135	0.572607	0.84518	0.958788	0.0746424	0.538244	0.316053	0.837223	0.854925
427	N-acetylmethionine	433	TRUE	-0.247887	0.057683	-0.0118295	-0.452894	-0.340867	0.000975766	0.0165477	1.58352	11.0721	0.770355	0.661038	0.926366	3.03395e-06	0.0222756	0.954063	0.0249152	0.67382	0.0025938	0.982346	0.854925
213	C-glycosyltryptophan	433	TRUE	-2.08325	0.0582167	-0.179799	-0.0834099	0.01363	0.0242312	0.0313313	9.28605	3.78408	0.0151022	0.661144	0.164122	0.394416	0.92787	0.156508	2.59935e-05	0.014491	0.307877	0.703603	0.854925
795	taurolithocholate 3-sulfate	433	TRUE	0.383965	-0.0556668	0.141207	0.0929104	-0.115193	0.00535536	-0.0226494	8.61042	5.65758	0.639609	0.661231	0.253268	0.321285	0.423767	0.743358	0.00147822	0.01778	0.110951	0.731074	0.854925
601	1-stearoyl-2-dihomo-linolenoyl-GPI (18:0/20:3n3 or 6)*	433	TRUE	-2.46523	0.0588493	-0.01497	-0.114733	-0.181948	0.0398714	0.021428	9.341	-12.8447	0.00486421	0.664348	0.909679	0.251303	0.236648	0.0224197	0.00484794	0.0160234	0.00070014	0.978263	0.857717
375	palmitate (16:0)	433	TRUE	-0.831962	-0.0548961	0.238344	-0.315795	-0.131034	0.00575587	0.0226566	5.4927	-1.05735	0.311722	0.666552	0.0545171	0.000775849	0.364279	0.725688	0.00152106	0.131671	0.76645	0.554721	0.859325
759	glutamine conjugate of C7H12O2*	433	TRUE	-0.864391	0.0571571	-0.0254738	-0.109277	-0.214743	0.0169056	0.00474979	2.86169	0.886295	0.318546	0.670287	0.84538	0.269673	0.158245	0.328083	0.528167	0.456044	0.81322	0.961265	0.862898
654	3,4-methyleneheptanoate	433	TRUE	-0.279431	0.0557185	0.141092	0.148501	-0.0346609	-0.00262403	0.0104557	-5.68475	-6.77568	0.74397	0.674202	0.27393	0.128674	0.817563	0.877802	0.159577	0.133672	0.0673118	0.739821	0.864755
489	X - 12729	433	TRUE	0.536486	-0.0532774	-0.110669	0.0469083	-0.014039	0.00596091	-0.0290252	-19.7902	7.89571	0.512509	0.674597	0.370083	0.616177	0.922258	0.715249	4.5409e-05	4.94335e-08	0.025958	0.789545	0.864755
305	branched chain 14:0 dicarboxylic acid**	433	TRUE	1.23185	-0.0494928	0.268472	-0.0567506	0.00982578	0.00541467	-0.0534588	-2.73086	5.20029	0.105544	0.674647	0.0192698	0.513936	0.941398	0.721342	6.26382e-16	0.417986	0.114442	0.44604	0.864755
882	5-acetylamino-6-amino-3-methyluracil	433	TRUE	0.237538	0.0490809	0.0369529	0.176921	-0.16416	0.00364841	-0.0132923	6.68232	-1.92571	0.753769	0.675673	0.746139	0.0408467	0.21707	0.809146	0.0433663	0.0463934	0.556881	0.937645	0.864755
255	leucine	433	TRUE	-1.19834	0.0472278	-0.0146953	1.0326	0.153191	-0.00299691	0.0344394	-1.59381	-6.1069	0.101049	0.676555	0.893871	3.86034e-35	0.232625	0.837112	5.83517e-08	0.62252	0.0535371	0.970832	0.864755
892	3-hydroxyhexanoate	433	TRUE	-0.438816	0.0551869	0.0544412	0.131099	-0.0851364	0.0152376	-0.0117609	-4.52216	-1.93888	0.609379	0.678282	0.674077	0.181464	0.572429	0.373742	0.115	0.234611	0.601971	0.912651	0.865284
389	X - 24813	433	TRUE	0.0611509	-0.0458922	0.142096	0.00963417	0.0224531	-0.00217844	0.00133269	0.732865	-2.17419	0.931978	0.679238	0.188221	0.906293	0.858363	0.87884	0.830475	0.81739	0.483233	0.708224	0.865284
250	cinnamoylglycine	433	TRUE	0.250303	-0.0467865	0.115865	-0.258634	-0.31707	0.0284464	-0.0505145	13.3806	10.6664	0.732368	0.679878	0.293618	0.00198029	0.0136369	0.051367	1.9725e-15	3.68361e-05	0.000760693	0.746611	0.865284
833	1-methyl-4-imidazoleacetate	433	TRUE	-2.23874	0.0522469	-0.182194	0.306595	0.0546772	0.0396335	0.00710401	9.18118	-2.13118	0.00632607	0.680832	0.140434	0.00106339	0.70416	0.0153815	0.318688	0.0114877	0.548188	0.687589	0.865284
836	3-methoxytyrosine	433	TRUE	-1.27119	-0.0535212	0.0383601	-0.235553	-0.0503859	0.0283997	-0.000863338	-4.08407	4.8787	0.13267	0.682782	0.763389	0.0147278	0.73433	0.0921594	0.906438	0.275517	0.182462	0.938722	0.866534
540	1-oleoyl-2-dihomo-linolenoyl-GPC (18:1/20:3)*	433	TRUE	-1.64498	0.0546004	0.0417111	-0.339382	-0.0703947	0.026509	0.0170703	11.5071	-2.65616	0.0573032	0.683781	0.749126	0.000596563	0.643207	0.124589	0.0231835	0.00268523	0.478239	0.938361	0.866574
685	docosapentaenoate (n3 DPA; 22:5n3)	433	TRUE	-1.40812	-0.0521595	0.202377	-0.166438	-0.0603649	0.0225914	0.0100833	7.33503	-0.141779	0.0916254	0.686688	0.107741	0.0809236	0.680507	0.174854	0.164458	0.0473183	0.9687	0.668546	0.868064
763	2-aminobutyrate	433	TRUE	-0.450489	0.0551012	0.00322467	0.0965017	0.109679	0.00652574	0.0016613	6.51328	-9.04881	0.609698	0.686894	0.980658	0.338429	0.479117	0.710835	0.828464	0.0957043	0.0178368	0.986869	0.868064
742	X - 11441	433	TRUE	-0.626106	0.0519377	0.0178805	0.431522	-0.0887649	0.0208208	-0.018917	-0.192027	-2.99226	0.457043	0.690447	0.887942	7.2242e-06	0.548247	0.215018	0.00970496	0.958937	0.411563	0.96831	0.869725
107	X - 21339	433	TRUE	0.221995	-0.0531852	-0.166954	0.326757	0.257063	-0.0303945	0.0399787	-12.4087	-1.67091	0.796871	0.690577	0.199047	0.000911642	0.08966	0.0772681	9.55539e-08	0.00116379	0.654454	0.71625	0.869725
227	1-linoleoyl-GPG (18:2)*	433	TRUE	-1.70305	0.0532058	0.217461	0.246276	0.0762838	0.0122485	0.0303369	3.2828	-0.708637	0.0488123	0.691121	0.0951104	0.0126311	0.615306	0.477466	5.36239e-05	0.391308	0.849783	0.640744	0.869725
152	docosahexaenoate (DHA; 22:6n3)	433	TRUE	-0.374132	-0.0511992	0.193779	-0.12262	-0.0287866	0.0263995	-0.0336683	1.88129	3.28199	0.655909	0.693872	0.125753	0.201137	0.845227	0.114985	3.93483e-06	0.613046	0.36653	0.677913	0.871962
854	1-(1-enyl-stearoyl)-2-docosahexaenoyl-GPC (P-18:0/22:6)*	433	TRUE	1.13391	0.0492908	-0.100581	-0.0186615	0.00666067	0.00946678	-0.05569	-6.51464	4.49844	0.162442	0.695075	0.411049	0.840509	0.962734	0.558771	2.88058e-15	0.0700556	0.200445	0.801319	0.872251
169	EDTA	433	TRUE	-0.898798	0.0555041	-0.0385004	0.433017	-0.0310632	0.00968978	0.0129517	-5.60321	3.50837	0.329421	0.697441	0.781658	3.90549e-05	0.847797	0.598117	0.105777	0.169943	0.379136	0.943664	0.873996
634	X - 23590	433	TRUE	-0.207991	0.0508349	-0.161575	-0.110092	0.151339	-0.021788	0.0462614	5.7014	-2.2788	0.808379	0.702001	0.211344	0.26115	0.314997	0.202803	5.36355e-10	0.13347	0.539314	0.720701	0.876848
268	X - 18921	433	TRUE	0.0247766	0.0509963	-0.0229067	0.266437	-0.159729	-0.00409048	0.00332262	-8.13473	-4.30002	0.977075	0.702615	0.860094	0.00683109	0.291491	0.812009	0.657398	0.0332049	0.249259	0.963954	0.876848
846	glutarylcarnitine (C5-DC)	433	TRUE	-0.266163	0.0477753	-0.0320238	0.432587	0.101362	0.0125881	-0.0151596	7.80477	-1.86682	0.741806	0.702653	0.792564	2.7689e-06	0.474958	0.434712	0.0307988	0.0292074	0.593446	0.949382	0.876848
402	3-indoxyl sulfate	433	TRUE	0.145641	0.051977	-0.104183	0.165554	0.439059	0.00265873	-0.0117941	2.90589	2.73473	0.868843	0.703639	0.433241	0.100365	0.00458885	0.879879	0.123801	0.45707	0.473795	0.810653	0.876858
230	linolenate [alpha or gamma; (18:3n3 or 6)]	433	TRUE	-0.393697	-0.048711	0.308327	-0.398888	-0.24708	0.00877169	0.00224447	3.26469	-1.16765	0.63661	0.705928	0.0141009	2.78832e-05	0.0913512	0.597705	0.756571	0.376532	0.746158	0.425647	0.877297
704	1-palmityl-2-arachidonoyl-GPC (O-16:0/20:4)*	433	TRUE	0.865929	0.0493301	0.0583131	0.242749	0.110927	-0.024572	0.00549496	5.14444	2.43454	0.305204	0.706133	0.646891	0.011866	0.454516	0.144667	0.453953	0.169138	0.505426	0.905647	0.877297
289	stearoylcarnitine (C18)	433	TRUE	-1.32964	0.0463654	0.0337989	0.67506	-0.116057	0.0398085	-0.0280291	2.58471	-2.96515	0.094854	0.706929	0.778184	1.14243e-13	0.406443	0.0121743	5.0684e-05	0.463612	0.389491	0.943664	0.877297
614	N-acetylthreonine	433	TRUE	-0.0420611	0.049053	0.00562492	0.473587	0.148718	-0.00860642	0.00993555	6.42495	3.92585	0.960376	0.708389	0.964841	9.74358e-07	0.317186	0.610304	0.176797	0.0867082	0.284034	0.986869	0.877787
432	N-acetylisoleucine	433	TRUE	-0.529859	0.0519558	-0.0705578	0.673717	-0.0149037	-0.0128807	0.032847	2.78908	2.10806	0.555859	0.709283	0.602818	5.53716e-11	0.924842	0.472867	2.64141e-05	0.484036	0.588251	0.877646	0.877787
129	margarate (17:0)	433	TRUE	-0.717185	-0.0486449	0.254226	-0.157823	-0.156679	0.005028	0.0164062	5.15253	0.323444	0.397449	0.711015	0.0465924	0.103099	0.292512	0.766157	0.0258918	0.169991	0.929746	0.531112	0.878022
92	N,N-dimethylalanine	433	TRUE	0.475435	-0.0472775	-0.0276545	0.0647213	-0.013371	-0.00364275	-0.0119514	4.56146	-0.986624	0.56441	0.711433	0.824007	0.492245	0.926468	0.824808	0.0954518	0.212008	0.782324	0.961265	0.878022
827	margaroylcarnitine (C17)*	433	TRUE	-1.19927	0.0465935	0.136293	0.490162	-0.19954	0.0231574	-0.00258952	5.63009	-5.65097	0.144543	0.71442	0.271291	1.78735e-07	0.166864	0.157821	0.716908	0.122071	0.112212	0.739821	0.879591
49	X - 12026	433	TRUE	-0.595896	-0.044995	0.0144451	-0.147797	0.236844	-0.00575887	0.0325749	9.12506	8.84872	0.455665	0.716144	0.904504	0.105307	0.0913447	0.717775	2.68607e-06	0.00992095	0.0104906	0.975253	0.879591
826	myristoleoylcarnitine (C14:1)*	433	TRUE	-1.83701	-0.0475906	0.128081	0.120331	-0.0823995	0.0435304	-0.0110522	-2.27817	-2.35251	0.0299151	0.716534	0.315227	0.213146	0.579201	0.00989994	0.132731	0.543331	0.520638	0.767509	0.879591
125	1-methylnicotinamide	433	TRUE	0.579095	0.0464394	0.142593	-0.106451	-0.0233292	0.00444306	-0.026292	6.28668	-6.37728	0.4832	0.716631	0.252036	0.259214	0.872219	0.787395	0.000248481	0.0857669	0.074445	0.731074	0.879591
390	dihomo-linoleate (20:2n6)	433	TRUE	-0.831576	-0.0462003	0.202343	-0.36368	-0.179117	0.00517732	0.0230383	0.370466	-3.80157	0.317768	0.720123	0.106796	0.00013095	0.220453	0.755173	0.00144502	0.919976	0.291365	0.668546	0.882668
46	isoleucine	433	TRUE	-1.5855	0.0407783	0.0411423	1.01476	0.0974133	-0.00250523	0.0462522	-3.84522	-5.52341	0.0325182	0.722624	0.712827	4.62811e-33	0.45448	0.865516	7.06857e-13	0.241844	0.0853085	0.922678	0.884523
703	1-palmitoyl-GPG (16:0)*	433	TRUE	-1.65902	0.0466073	0.286051	0.268801	0.238298	0.00970029	0.0323188	7.68188	0.537052	0.0514566	0.723939	0.0258862	0.00573904	0.111168	0.568065	1.2613e-05	0.0417876	0.884192	0.44604	0.884924
521	3-hydroxymyristate	433	TRUE	-0.387571	-0.0451712	0.22899	-0.0627168	-0.051321	0.00838412	-0.00148209	3.55504	2.61685	0.642267	0.726722	0.0686278	0.51053	0.726146	0.614416	0.838005	0.336155	0.468696	0.609138	0.887116
669	glycosyl-N-behenoyl-sphingadienine (d18:2/22:0)*	433	TRUE	-1.15363	0.0456793	-0.104813	-0.193052	-0.503479	0.0373363	-0.016655	-0.412389	-4.18878	0.173746	0.728078	0.412267	0.0463066	0.000723863	0.0273124	0.023811	0.912601	0.253853	0.801319	0.887562
741	creatinine	433	TRUE	-0.380783	0.0399453	-0.0651532	1.12308	0.194724	0.00788496	-0.0145201	12.1694	8.30939	0.612103	0.731317	0.564881	3.67876e-39	0.139802	0.598612	0.0260556	0.000254261	0.0105776	0.86214	0.890299
424	X - 16580	433	TRUE	-2.49672	0.0440709	-0.0608563	0.21288	-0.0785434	0.0486096	0.00219892	3.0401	-2.71108	0.00268271	0.732312	0.627366	0.025056	0.59076	0.00338922	0.76091	0.409331	0.451412	0.892254	0.8903
401	sphingomyelin (d18:1/19:0, d19:1/18:0)*	433	TRUE	-1.95371	-0.0436725	-0.0411877	-0.264564	-0.328119	0.0266385	0.0293902	0.0407446	-0.870614	0.0194175	0.735905	0.743729	0.00559315	0.0253976	0.110101	5.19064e-05	0.991221	0.809838	0.936165	0.893456
142	X - 22776	433	TRUE	0.444608	0.0482719	-0.165907	-0.332442	-0.236637	-0.00772602	0.00698906	-7.06093	1.10368	0.633893	0.738544	0.23839	0.0018258	0.148922	0.67822	0.388891	0.0877761	0.784756	0.731074	0.894976
862	phenylacetylcarnitine	433	TRUE	-2.01646	0.0450276	0.078694	0.183674	0.218283	0.0423951	-0.00557568	-3.8633	0.896024	0.021676	0.740679	0.552208	0.0671458	0.156999	0.0155202	0.464982	0.320751	0.813666	0.86214	0.894976
803	X - 11372	433	TRUE	0.953646	-0.0439215	-0.0351521	0.513439	-0.027381	-0.0255634	0.00378569	-0.193801	-5.71202	0.266166	0.740962	0.785684	1.60196e-07	0.855748	0.135104	0.611441	0.959321	0.123891	0.943664	0.894976
720	1-stearoyl-2-docosapentaenoyl-GPC (18:0/22:5n6)*	433	TRUE	-0.2658	-0.0425377	0.0987411	-0.118044	0.197831	-0.0154221	0.0359576	0.61527	2.05611	0.749632	0.741645	0.431575	0.214751	0.176227	0.353273	6.74295e-07	0.867574	0.56847	0.810653	0.894976
594	dodecanedioate (C12-DC)	433	TRUE	-0.293855	0.0416056	0.135617	-0.0587658	-0.127182	0.0159001	-0.0178953	12.935	-5.81222	0.718862	0.742151	0.270382	0.528585	0.374998	0.328826	0.0116345	0.000347955	0.0999869	0.739821	0.894976
462	p-cresol glucuronide*	433	TRUE	-0.569627	0.0433654	0.160561	-0.188061	0.162933	0.018383	-0.00875639	5.6421	3.08912	0.508244	0.745092	0.216028	0.0558839	0.281249	0.284465	0.241818	0.139109	0.407185	0.720701	0.896847
192	succinylcarnitine (C4-DC)	433	TRUE	-0.644223	0.0388035	0.00826343	0.533406	0.195949	-0.0156609	0.0442382	3.1254	-0.177992	0.406564	0.746923	0.943694	1.7946e-09	0.150594	0.311788	5.40666e-11	0.363424	0.957751	0.98583	0.896847
66	glutamine conjugate of C6H10O2 (2)*	433	TRUE	-1.0538	-0.0423107	-0.152837	-0.156035	-0.105296	0.0210476	0.004974	-2.64017	-3.96849	0.216754	0.748863	0.234631	0.109378	0.482193	0.216158	0.502216	0.484845	0.282536	0.731074	0.896847
673	X - 21286	433	TRUE	-0.715533	-0.0443525	0.0300439	-0.130568	0.176939	0.0169759	-0.00104637	-2.55797	3.65047	0.42514	0.74964	0.824187	0.202691	0.261448	0.342835	0.893221	0.519861	0.347219	0.961265	0.896847
290	palmitoyl dihydrosphingomyelin (d18:0/16:0)*	433	TRUE	0.158309	0.0402951	-0.0864136	-0.193622	-0.414481	0.0143235	-0.0236438	-3.2003	-1.59153	0.846247	0.750027	0.482546	0.0378915	0.00384222	0.379103	0.00085886	0.376255	0.652448	0.838218	0.896847
224	10-undecenoate (11:1n1)	433	TRUE	0.598439	0.0420593	0.122954	0.166441	-0.369914	-0.00153909	-0.0181184	1.35358	0.239781	0.482751	0.750158	0.338707	0.0874873	0.0134946	0.927893	0.0144562	0.720084	0.948197	0.780974	0.896847
507	myristoleate (14:1n5)	433	TRUE	-0.875364	0.0389831	0.222615	-0.816697	-0.285387	0.017413	0.0117858	10.0775	-2.32837	0.269086	0.750709	0.0622348	1.7832e-19	0.040204	0.270405	0.0867969	0.0040805	0.49706	0.585424	0.896847
661	gamma-glutamylglycine	433	TRUE	-0.0447522	0.0392872	-0.243207	-0.320999	-0.0782345	0.0204782	-0.0285526	7.6632	6.77546	0.955605	0.752404	0.0447364	0.000473425	0.579476	0.201578	4.35506e-05	0.03142	0.0515177	0.531112	0.897675
43	caffeine	433	TRUE	0.42832	0.039858	0.131925	0.0964207	-0.22256	-0.00764352	0.00102088	-2.48052	-2.49729	0.602954	0.754694	0.287829	0.305365	0.123803	0.641681	0.886538	0.496531	0.483531	0.746611	0.89921
488	1-palmitoyl-2-docosahexaenoyl-GPC (16:0/22:6)	433	TRUE	0.089833	0.0409414	0.0804411	-0.158676	0.0343557	0.0276041	-0.0479929	-1.52319	1.4504	0.91676	0.758479	0.534669	0.106095	0.819958	0.107389	1.30743e-10	0.68915	0.696652	0.849403	0.901939
681	docosahexaenoylcarnitine (C22:6)*	433	TRUE	0.256801	0.0399229	0.00471734	0.303113	0.161645	0.0137582	-0.0382295	-5.09077	2.13151	0.759821	0.758998	0.97028	0.00158464	0.27319	0.411582	1.62385e-07	0.171322	0.557724	0.986869	0.901939
76	12,13-DiHOME	433	TRUE	0.651024	0.0392339	0.122285	-0.359229	-0.236185	0.00724595	-0.0313457	1.95854	2.69414	0.434696	0.761208	0.330317	0.00016115	0.106583	0.662922	1.49887e-05	0.595787	0.455155	0.780974	0.903367
691	sphingomyelin (d17:1/16:0, d18:1/15:0, d16:1/17:0)*	433	TRUE	-1.372	0.0374715	-0.0236252	-0.0195231	-0.584347	0.0197659	0.0189571	2.78376	-1.76925	0.0862142	0.762284	0.844607	0.830772	3.16956e-05	0.215286	0.00636466	0.432001	0.609254	0.961265	0.903448
510	trans-urocanate	433	TRUE	-0.268609	0.0414012	-0.131791	-0.299539	-0.114063	0.00858919	-0.000943286	-1.14976	-0.9511	0.764846	0.765999	0.33022	0.00350129	0.469512	0.631572	0.903773	0.772575	0.806697	0.780974	0.905242
160	lithocholate sulfate (1)	433	TRUE	-0.153537	-0.0403797	0.317523	-0.0153181	-0.016062	0.000471566	0.00390357	-6.09675	-1.789	0.861526	0.767131	0.0167012	0.878922	0.917244	0.978573	0.609768	0.117948	0.638679	0.43441	0.905242
680	N-acetylglucosamine/N-acetylgalactosamine	433	TRUE	-3.07945	0.0371035	-0.0803636	-0.166903	0.14504	0.0335266	0.0516764	2.9182	-1.75187	0.000144271	0.767529	0.510515	0.0713563	0.308054	0.0380378	2.12763e-13	0.416227	0.617413	0.842397	0.905242
575	docosadienoate (22:2n6)	433	TRUE	-0.573343	0.0384215	0.254735	-0.173644	-0.252222	0.00427634	0.0116352	4.04564	-1.7601	0.496631	0.768705	0.0450928	0.0715065	0.0885952	0.799349	0.112344	0.278921	0.629716	0.531112	0.905242
563	xanthine	433	TRUE	-1.19284	0.0365126	0.0500291	0.295329	-0.0729255	-0.00727736	0.0528473	-0.294558	-11.3043	0.136932	0.76885	0.678987	0.00126685	0.604628	0.649184	3.35768e-14	0.93393	0.00112892	0.912651	0.905242
656	1-linoleoylglycerol (18:2)	433	TRUE	-1.48097	-0.0384837	-0.316996	0.263091	0.0391708	0.02388	0.0100599	2.48347	1.07424	0.0875874	0.77446	0.0152736	0.0078967	0.796965	0.167308	0.181711	0.517886	0.774676	0.43441	0.907349
624	threonine	433	TRUE	0.230404	-0.0397756	0.140922	-0.0814073	0.340664	0.000968447	-0.00817065	4.25076	3.72657	0.797244	0.774646	0.297181	0.426843	0.0305418	0.956826	0.294375	0.284667	0.337059	0.746611	0.907349
508	1-pentadecanoyl-2-docosahexaenoyl-GPC (15:0/22:6)*	433	TRUE	0.469354	-0.0369553	0.120334	-0.261938	-0.127491	0.0188927	-0.0436173	1.58431	1.92833	0.574115	0.775153	0.339115	0.00604197	0.384712	0.256755	1.84566e-09	0.668504	0.593739	0.780974	0.907349
484	X - 24411	433	TRUE	-0.29147	-0.0386718	0.0129024	0.1131	0.266695	-0.00501411	0.0129216	-4.10735	-7.54776	0.739218	0.775562	0.922121	0.258172	0.0828475	0.774043	0.0894169	0.289662	0.0464257	0.982346	0.907349
698	2'-O-methyluridine	433	TRUE	-0.597745	-0.0362008	0.108364	0.154768	-0.0207689	0.0195014	-0.012039	2.7028	6.19956	0.466113	0.775702	0.380722	0.0985657	0.885348	0.233248	0.0911407	0.456962	0.0807578	0.795359	0.907349
878	caprate (10:0)	433	TRUE	0.864867	0.0372681	0.0754772	-0.504255	-0.223996	0.00838384	-0.0358399	5.45293	4.39812	0.307972	0.776732	0.555016	1.95909e-07	0.132713	0.620287	1.16049e-06	0.146811	0.231026	0.86214	0.907369
474	hippurate	433	TRUE	-0.322822	-0.0353522	0.0191455	-0.0618308	-0.147834	0.0315528	-0.0396342	-2.09639	5.64521	0.689719	0.777773	0.875179	0.503267	0.297853	0.0504352	1.68789e-08	0.558406	0.106769	0.964527	0.907385
191	octadecenedioate (C18:1-DC)*	433	TRUE	-0.0371431	0.0362853	0.179847	0.0235764	-0.341656	0.0134179	-0.0241021	6.54447	2.09952	0.964468	0.778771	0.152424	0.804505	0.0196346	0.419798	0.000878132	0.0764421	0.560747	0.69561	0.907385
33	X - 21310	433	TRUE	-1.06288	0.0393371	-0.0842074	0.0588607	0.232654	0.0288508	-0.0123984	4.31348	2.68815	0.243701	0.780619	0.540044	0.571987	0.146218	0.11265	0.11756	0.285561	0.495774	0.85147	0.908356
140	hexadecadienoate (16:2n6)	433	TRUE	-0.824846	0.0358672	0.191245	-0.502465	-0.145536	0.0100007	0.0160854	2.06802	-2.98628	0.326116	0.782831	0.130926	1.63915e-07	0.323861	0.550599	0.0275298	0.578407	0.411464	0.677913	0.908422
605	pregnenetriol disulfate*	433	TRUE	-0.0591816	-0.0329312	0.135879	0.713928	-0.0562092	-0.0123215	0.0121257	-5.91321	-6.64763	0.939212	0.784145	0.245395	8.08674e-16	0.680028	0.426053	0.0721323	0.0854484	0.0478218	0.731074	0.908422
333	S-methylcysteine	433	TRUE	0.662402	-0.0353604	0.0377017	-0.167181	-0.232752	0.00912455	-0.0337885	-0.966859	-0.150352	0.427086	0.784338	0.764263	0.0793303	0.112061	0.583386	3.12512e-06	0.793583	0.966781	0.938722	0.908422
585	arginine	433	TRUE	-2.03272	0.0378142	-0.120717	-0.0162588	0.104566	0.0443598	-0.00450587	-7.32985	-4.05138	0.0229217	0.78473	0.370132	0.873458	0.505215	0.012823	0.561693	0.0640987	0.294912	0.789545	0.908422
312	1-stearoyl-2-dihomo-linolenoyl-GPC (18:0/20:3n3 or 6)*	433	TRUE	-1.98879	-0.0322966	0.0259694	-0.114891	0.074476	0.00792824	0.058343	11.9016	0.128909	0.011834	0.79189	0.827388	0.203073	0.591461	0.614938	1.9235e-17	0.000673837	0.969934	0.961265	0.915527
792	myristoylcarnitine (C14)	433	TRUE	-1.77155	0.0330137	0.152879	0.388554	-0.0790601	0.0355061	-0.00308727	0.810408	-0.875058	0.033968	0.798661	0.224747	4.6789e-05	0.589997	0.0331239	0.670621	0.826687	0.8088	0.729615	0.922165
153	1-(1-enyl-palmitoyl)-GPE (P-16:0)*	433	TRUE	-0.499668	-0.0317321	-0.312278	0.151145	-0.0029067	0.0090386	-0.00191157	-5.37472	-4.25831	0.538054	0.800711	0.0106771	0.103005	0.983727	0.576567	0.786299	0.134899	0.225383	0.423324	0.923343
867	X - 24307	433	TRUE	0.660798	0.0354127	-0.0601748	-0.0763459	0.0289444	-0.0100379	-0.00415784	-7.05806	9.30073	0.46881	0.802121	0.661638	0.463778	0.856618	0.581171	0.599862	0.0807182	0.0184951	0.910516	0.92378
259	gamma-glutamylhistidine	433	TRUE	-0.187194	0.0332053	0.0191282	0.275562	0.11039	0.00272499	-0.00332467	-4.78929	-13.2225	0.828663	0.804284	0.883359	0.00529174	0.46741	0.874507	0.658221	0.211372	0.000413076	0.966885	0.924614
310	1-palmityl-2-stearoyl-GPC (O-16:0/18:0)*	433	TRUE	-1.19983	-0.0329982	0.118426	-0.144842	-0.439014	0.0316731	-0.00733496	4.30989	-3.42354	0.164137	0.804909	0.36227	0.141507	0.00374716	0.0655888	0.327633	0.259291	0.359077	0.789545	0.924614
864	cystine	433	TRUE	0.129147	0.0307591	0.101684	0.182059	0.259042	-0.0218412	0.0296176	-2.03705	-0.569564	0.873159	0.80611	0.404326	0.048833	0.0682469	0.17588	2.51172e-05	0.569765	0.870787	0.801319	0.924802
545	laurate (12:0)	433	TRUE	0.478017	-0.0307386	0.0744804	-0.466542	-0.264289	0.00298825	-0.0158422	10.6351	1.57067	0.55646	0.807137	0.543237	5.04824e-07	0.0641006	0.85377	0.0248841	0.00314249	0.655286	0.85393	0.924802
501	N-methylproline	433	TRUE	0.0332747	0.0305855	-0.0276208	0.0747254	-0.0317546	0.00353108	-0.00611254	-4.5556	-1.74207	0.969039	0.81786	0.830745	0.445466	0.832956	0.83641	0.411877	0.23035	0.638748	0.961265	0.928221
136	10-heptadecenoate (17:1n7)	433	TRUE	-1.64861	-0.0288626	0.235636	-0.506104	-0.226965	0.0220116	0.0263751	9.18576	-2.25473	0.0427783	0.81891	0.0547306	5.20976e-08	0.112264	0.175095	0.000191369	0.0108378	0.522111	0.554721	0.928221
769	X - 13729	433	TRUE	-0.617003	0.0315676	-0.0682069	-0.0538235	0.0712537	0.0198039	-0.0115767	10.8136	9.92126	0.491626	0.820322	0.613999	0.599477	0.651101	0.26846	0.137519	0.00651558	0.0106258	0.878823	0.928221
504	ribonate	433	TRUE	-1.62209	0.0297916	-0.191348	-0.221388	-0.00143324	0.0249169	0.0166335	2.39185	3.82371	0.057941	0.822134	0.137825	0.0234906	0.992388	0.144237	0.0252343	0.52797	0.301783	0.68686	0.928221
392	malate	433	TRUE	0.60183	0.0285152	0.11499	0.337493	0.0948914	-0.00522084	-0.0191267	5.57082	-1.8514	0.464973	0.823162	0.354337	0.000334777	0.511819	0.750659	0.00752635	0.126843	0.603557	0.787807	0.928221
734	X - 21821	433	TRUE	0.0121497	-0.029199	0.133751	-0.0621553	0.0626216	0.0168104	-0.0298736	-2.15941	6.90791	0.988638	0.825152	0.298311	0.523655	0.675988	0.323256	5.57986e-05	0.567786	0.0614067	0.746611	0.928221
82	tryptophan betaine	433	TRUE	-0.526313	0.028364	0.0388158	-0.138338	-0.14739	0.0230602	-0.0164427	15.8858	-2.5381	0.525693	0.825276	0.756183	0.144264	0.311575	0.163344	0.0225046	1.53583e-05	0.479568	0.938722	0.928221
297	cys-gly, oxidized	433	TRUE	0.698568	0.0278593	0.140236	0.526267	0.116735	-0.0143871	-0.00507108	7.22937	5.98439	0.398805	0.828042	0.261125	2.63376e-08	0.422058	0.383664	0.48085	0.0487259	0.0949423	0.731074	0.928221
658	X - 22771	433	TRUE	-0.830708	0.0290431	0.169064	0.439923	0.0952371	0.0209813	-0.0100569	-1.60349	-0.730552	0.336555	0.828301	0.194446	8.39402e-06	0.530433	0.223676	0.180575	0.675429	0.845201	0.708224	0.928221
884	X - 11381	433	TRUE	-3.19061	0.0273564	-0.012995	0.553114	0.0111252	0.0429055	0.0331528	-1.38626	-2.01622	8.94417e-05	0.828344	0.915696	2.76602e-09	0.938001	0.0082649	2.80026e-06	0.700827	0.567373	0.980244	0.928221
273	carotene diol (3)	433	TRUE	0.806617	0.0275638	-0.0588485	-0.118085	-0.181608	0.0226121	-0.0644548	-5.60107	1.79965	0.327311	0.828929	0.635415	0.209382	0.20919	0.168627	2.08888e-19	0.124704	0.613632	0.897999	0.928221
123	palmitoleoyl-linoleoyl-glycerol (16:1/18:2) [1]*	433	TRUE	-1.02895	0.0282701	-0.011222	0.0869941	0.376554	-0.00690135	0.0480959	3.10616	-10.4158	0.226977	0.830331	0.930338	0.371235	0.0118142	0.684559	8.052e-11	0.41036	0.0047211	0.982346	0.928221
279	adenosine	433	TRUE	-0.155039	-0.0274001	0.142092	-0.11079	-0.0536844	0.00227731	0.00508231	-7.20302	-1.69979	0.851958	0.831404	0.256497	0.243065	0.712908	0.890696	0.481386	0.0503399	0.63644	0.731074	0.928221
638	sphingomyelin (d18:1/21:0, d17:1/22:0, d16:1/23:0)*	433	TRUE	-1.2908	-0.0283819	-0.0727829	-0.17121	-0.461225	0.021412	0.0142605	7.03329	-2.31318	0.134724	0.831875	0.575803	0.0824514	0.00234055	0.213552	0.0571944	0.065826	0.535758	0.865637	0.928221
793	lignoceroyl sphingomyelin (d18:1/24:0)	433	TRUE	-0.830914	-0.028551	-0.175078	0.300939	-0.434834	0.0264574	-0.0152843	1.11906	2.49741	0.340079	0.832415	0.182337	0.00249	0.00447186	0.127792	0.0434166	0.771803	0.507693	0.708224	0.928221
415	sphingomyelin (d18:1/24:1, d18:2/24:0)*	433	TRUE	-1.77607	0.0279328	0.00881747	-0.029131	-0.66288	0.0471211	-0.0149541	0.17003	1.35641	0.0377697	0.832967	0.945451	0.765507	1.01109e-05	0.00572712	0.0441125	0.964195	0.713979	0.98583	0.928221
850	dodecenedioate (C12:1-DC)*	433	TRUE	-0.286423	-0.0284144	0.0134979	-0.0344761	-0.0881003	0.0114059	-0.0106178	2.54571	-0.516808	0.742113	0.833105	0.918059	0.728809	0.564396	0.511235	0.160347	0.509157	0.890899	0.9816	0.928221
376	docosadioate (C22-DC)	433	TRUE	-0.0697081	0.0284618	0.092279	0.199073	-0.0983641	-0.000858639	0.00130354	-3.15636	0.678826	0.936298	0.833159	0.482724	0.0457182	0.520755	0.960637	0.863428	0.414003	0.857303	0.838218	0.928221
34	nonadecanoate (19:0)	433	TRUE	0.0213616	0.0278169	0.250075	-0.0766726	-0.422362	0.00676954	-0.0149029	9.1694	2.61854	0.980046	0.833477	0.0520695	0.431961	0.00486388	0.691101	0.0446158	0.015377	0.478753	0.551326	0.928221
544	N-stearoyl-sphingosine (d18:1/18:0)*	433	TRUE	-2.41646	-0.0280847	-0.207684	0.0541679	0.0819541	0.0208194	0.0499422	0.179123	-4.43885	0.00513463	0.833706	0.110566	0.582923	0.588902	0.226769	2.80356e-11	0.962654	0.234994	0.668546	0.928221
241	adrenate (22:4n6)	433	TRUE	-1.62678	0.0278584	0.219738	-0.23617	-0.0812555	0.0151885	0.0323447	10.0352	2.65233	0.0577652	0.833859	0.0890574	0.0158939	0.589424	0.374465	1.41175e-05	0.00823942	0.474784	0.627245	0.928221
117	X - 22789	433	TRUE	-0.205294	-0.0279553	0.154408	0.229308	-0.0780668	0.0126639	-0.0182408	-9.51953	0.547558	0.811978	0.834374	0.235242	0.0200278	0.606505	0.461958	0.0149941	0.0127826	0.883468	0.731074	0.928221
726	eicosanedioate (C20-DC)	433	TRUE	0.50343	-0.0279959	-0.0726305	0.311294	-0.122962	-0.00650803	-0.0083483	-7.23395	3.16152	0.560878	0.834638	0.577791	0.00164552	0.418634	0.70626	0.267049	0.0592688	0.398833	0.865721	0.928221
223	stearate (18:0)	433	TRUE	-0.781386	-0.0266946	0.206753	-0.130748	-0.21884	0.00887028	0.010956	5.55621	1.90671	0.34983	0.836653	0.100759	0.170874	0.135974	0.594681	0.131379	0.133464	0.598161	0.662222	0.928221
729	glycolithocholate sulfate*	433	TRUE	-0.349748	0.0270969	0.165556	0.0572854	-0.0754472	0.0145053	-0.0135804	5.63744	2.5127	0.680931	0.837069	0.196596	0.555493	0.613503	0.392583	0.066127	0.134642	0.494939	0.710284	0.928221
712	theophylline	433	TRUE	0.900093	0.0251495	0.0985375	0.0766118	-0.221582	-0.0121184	-0.00726819	1.60948	-2.42163	0.255331	0.837445	0.408718	0.396711	0.110824	0.442627	0.290451	0.646153	0.479558	0.801319	0.928221
35	X - 12216	433	TRUE	0.235877	0.0267095	0.0995814	0.0420445	-0.0438547	0.0145275	-0.0333715	14.9932	9.93608	0.780541	0.838624	0.435183	0.663763	0.768026	0.389649	5.71597e-06	6.40266e-05	0.00670053	0.810653	0.928221
138	ethylmalonate	433	TRUE	-0.00252078	-0.0278363	0.042737	-0.233237	0.417626	0.00203694	-0.0010231	9.54841	-7.10508	0.997758	0.841236	0.751945	0.0228455	0.008026	0.909366	0.895565	0.016276	0.0672721	0.938361	0.928221
331	X - 12707	433	TRUE	0.625363	-0.0258806	-0.125137	0.285812	-0.0465813	0.0119035	-0.0474676	7.72425	6.16844	0.454968	0.841793	0.321252	0.00279764	0.751321	0.475862	6.70702e-11	0.0372427	0.0886434	0.776962	0.928221
262	alpha-hydroxyisocaproate	433	TRUE	0.0716371	0.0227155	-0.0890849	1.00903	0.0749696	-0.0167432	0.0118648	4.60232	-2.12609	0.922486	0.842132	0.422113	3.68042e-33	0.562031	0.254242	0.06363	0.158237	0.504676	0.807886	0.928221
208	5-oxoproline	433	TRUE	-0.120343	0.0246218	0.077216	0.531252	-0.125291	0.0117467	-0.0189485	3.33174	-2.21004	0.881793	0.844308	0.52675	9.13489e-09	0.378038	0.466831	0.00704669	0.352766	0.528124	0.846475	0.928221
225	oleate/vaccenate (18:1)	433	TRUE	-1.03925	0.0242777	0.234682	-0.40669	-0.257619	0.0167725	0.0124905	5.15545	-4.69404	0.198441	0.846233	0.054026	1.05652e-05	0.0694916	0.298111	0.0752623	0.149869	0.179623	0.554721	0.928221
839	octadecadienedioate (C18:2-DC)*	433	TRUE	-0.183831	-0.0275771	0.0040961	-0.0693072	-0.409321	0.0248163	-0.0332569	2.18605	6.10899	0.841302	0.84626	0.976387	0.50874	0.011129	0.175395	3.05997e-05	0.590956	0.124243	0.986869	0.928221
764	S-methylcysteine sulfoxide	433	TRUE	0.302619	-0.0241441	0.0142392	-0.219467	-0.251579	0.0239114	-0.0452567	0.971406	1.57491	0.708172	0.847133	0.906981	0.0174891	0.0764102	0.138146	1.17437e-10	0.786227	0.652683	0.976749	0.928221
695	X - 24455	433	TRUE	1.35634	0.0280538	-0.0785054	0.0755998	0.265458	-0.0289285	-0.0031457	12.8681	3.40759	0.156251	0.84986	0.586148	0.489093	0.114098	0.129528	0.705101	0.0023957	0.410563	0.872407	0.928221
888	andro steroid monosulfate C19H28O6S (1)*	433	TRUE	-0.643086	0.0231741	0.336007	0.61036	-0.0413052	-0.0058639	0.0230485	-3.83903	-7.32261	0.422695	0.852051	0.00544961	2.71825e-11	0.769348	0.713989	0.000942471	0.279984	0.0349367	0.406376	0.928221
753	10-nonadecenoate (19:1n9)	433	TRUE	-0.934438	-0.0237092	0.262811	-0.356281	-0.2439	0.0070347	0.0236811	8.03602	-2.64521	0.260761	0.853863	0.0358714	0.00017446	0.0946402	0.671249	0.00103768	0.0290341	0.462056	0.507352	0.928221
494	linoleoylcarnitine (C18:2)*	433	TRUE	-0.109109	0.0229334	0.110404	0.782295	-0.0973469	0.002693	-0.00999872	-9.86519	-3.64062	0.893425	0.855761	0.36846	4.15892e-17	0.496115	0.868337	0.15766	0.00625318	0.301732	0.789545	0.928221
91	palmitoyl-linoleoyl-glycerol (16:0/18:2) [1]*	433	TRUE	-1.11268	0.0226567	-0.117099	0.477843	0.246712	-0.00236142	0.0392246	-2.97076	-7.13924	0.167667	0.856088	0.335381	2.13946e-07	0.0815098	0.883292	2.16949e-08	0.405686	0.0408348	0.780974	0.928221
493	3-hydroxyoctanoate	433	TRUE	-0.046747	-0.0233045	0.127868	0.169251	0.0373403	0.00631071	-0.0133218	-4.68522	3.71095	0.955099	0.856216	0.306891	0.0743457	0.797878	0.703159	0.0647883	0.202738	0.301786	0.757506	0.928221
643	X - 12798	433	TRUE	-3.64103	0.0241074	0.201168	0.0455088	-0.0571804	0.0517597	0.0392706	4.92987	-1.35657	2.37128e-05	0.856643	0.121312	0.643762	0.705456	0.00259327	1.54855e-07	0.196436	0.715998	0.677913	0.928221
436	X - 24544	433	TRUE	1.2287	-0.0206274	0.22144	0.72573	0.0495464	-0.0282761	-0.00693994	-1.17557	-5.83094	0.0966003	0.857103	0.0469597	8.63611e-18	0.702821	0.0552436	0.280092	0.719719	0.0685062	0.531112	0.928221
53	1-margaroyl-2-arachidonoyl-GPC (17:0/20:4)*	433	TRUE	0.527012	-0.0232433	0.200662	0.00855547	0.497829	-0.0128409	-0.00136607	8.80465	7.07107	0.527258	0.857164	0.110276	0.928416	0.000672676	0.439977	0.850405	0.0171229	0.0500389	0.668546	0.928221
831	taurochenodeoxycholate	433	TRUE	0.114629	-0.0234428	0.00609089	0.0782564	0.0844675	-0.0124061	0.013894	-1.20297	0.598354	0.891621	0.857251	0.961691	0.415501	0.567524	0.459738	0.0573373	0.746878	0.869486	0.986869	0.928221
363	theobromine	433	TRUE	0.342204	0.0221736	-0.0856196	-0.0467041	-0.245112	-0.00628748	0.00524944	6.65452	-0.310808	0.668051	0.857651	0.476582	0.608431	0.0802934	0.692847	0.448995	0.059798	0.928303	0.838218	0.928221
407	X - 15728	433	TRUE	0.672552	0.0232307	0.319544	0.157892	-0.0497604	-0.00024294	-0.0261889	5.17199	-0.0651968	0.421553	0.857776	0.0112949	0.0985961	0.734906	0.988387	0.000315797	0.162977	0.985639	0.423324	0.928221
830	tyramine O-sulfate	433	TRUE	-1.30795	0.0240156	-0.14534	0.269713	0.26125	0.0204556	0.00663529	-3.93364	4.91624	0.138434	0.860598	0.274708	0.007484	0.0919596	0.245366	0.386996	0.314501	0.198233	0.739821	0.930152
872	carotene diol (2)	433	TRUE	1.16847	-0.021123	-0.0231711	-0.169168	-0.239119	0.0205022	-0.0715233	-9.07568	0.856537	0.136237	0.861969	0.844595	0.0589914	0.0825296	0.189986	8.9648e-26	0.00899594	0.80079	0.961265	0.930511
377	N-acetylneuraminate	433	TRUE	-0.952143	0.0231883	0.185651	-0.18611	0.260409	0.0087725	0.0180205	8.86681	2.09955	0.274505	0.863604	0.157495	0.0615244	0.0887984	0.613748	0.0173006	0.0216199	0.57775	0.698593	0.931154
253	beta-alanine	433	TRUE	0.714972	-0.0232055	-0.0606947	0.573797	0.263897	-0.0288784	0.0151393	1.2297	-5.90074	0.420816	0.866065	0.650279	1.55574e-08	0.090666	0.103089	0.0497839	0.754643	0.124813	0.906818	0.932639
[truncated: 64 more rows]

## Sheet: Delta_Age_Top_CA
	col1	n	converged	Intercept	C(Delta_Age_Status_Indiv)[T.Bio_Old]	C(Delta_Age_Status_Indiv)[T.Bio_Young]	C(sex)[T.M]	meds_cholesterol[T.Yes]	age	BMI_CALC	PC1	PC2	Intercept_p	C(Delta_Age_Status_Indiv)[T.Bio_Old]_p	C(Delta_Age_Status_Indiv)[T.Bio_Young]_p	C(sex)[T.M]_p	meds_cholesterol[T.Yes]_p	age_p	BMI_CALC_p	PC1_p	PC2_p	Bio_Young_pval_adj	Bio_Old_pval_adj
[truncated: 896 more rows]

[truncated: 4 more sheets: Delta_Age_CA_Tertile_Overlaps, APOE_Bottom_CA, APOE_Mid_CA, APOE_Top_CA]
