# Supplementary material for: APOE genotype and biological age impact inter-omic associations related to bioenergetics
Source: Aging (Albany NY). 2025 May 3;17(5):1105–38. doi: 10.18632/aging.206243 (PMC12151507; doi:10.18632/aging.206243)
Supplement: Supplementary File 4 [file aging-17-206243-s006.xlsx]

## Sheet: Explainer
Supplementary File 4. contains the results data for the validation cohort (TwinsUK) individual metabolite abundance analysis and corresponding enrichment analysis.
tab0: Expaliner tab
E2 defined as E2/E2 and E2/E3; E4 defined as E3/E4 and E4/E4; E3 defined as E3/E3
752 metabolites from Metabolon after removing those with >20% missingness, RF imputation
p adj by FDR Benjamini-Hochberg, FDR set to 5%
lowest CA tertile [32.85-47.72] years; middle CA tertile (47.72,55.05] years; highest CA tertile (55.05-73.69] years
tab1: log2(z-scored metabolite) = intercept + E2 + E4 + age + sex(M) + BMI + cholesterol_reducing_meds(Yes) + batch2 + batch3 + batch4 + batch5 + e
tab2: enriched subpathways for results with pre-adjusted p < 0.05 from models in tab1
tab3: female only analysis of model in tab1
tab4: male only analysis of model in tab1
tab5: enriched subpathways for results with pre-adjusted p < 0.05 from models in tab3 & tab4
tabs 6-8, stratifying by CA tertile: log2(z-scored metabolite) = intercept + E2 + E4 + age + sex(M) + BMI + cholesterol_reducing_meds(Yes) + batch2 + batch3 + batch4 + batch5 + e

## Sheet: APOE Results TwinsUK
	col1	n	converged	Intercept	C(APOE_Status, Treatment(reference=1))[T.E2]	C(APOE_Status, Treatment(reference=1))[T.E4]	C(Sex)[T.M]	Statin_User[T.Yes]	MetBatch[T.b2]	MetBatch[T.b3]	MetBatch[T.b4]	MetBatch[T.b5]	Age	BMI	Intercept_p	C(APOE_Status, Treatment(reference=1))[T.E2]_p	C(APOE_Status, Treatment(reference=1))[T.E4]_p	C(Sex)[T.M]_p	Statin_User[T.Yes]_p	MetBatch[T.b2]_p	MetBatch[T.b3]_p	MetBatch[T.b4]_p	MetBatch[T.b5]_p	Age_p	BMI_p	E2_pval_adj	E4_pval_adj
152	2-hydroxybutyrate/2-hydroxyisobutyrate	1656	TRUE	-2.1429	-0.0284007	-0.193932	0.692504	-0.126785	-0.0507432	-0.12783	-0.180882	-0.0174407	0.0262463	0.0352764	1.31163e-25	0.687522	0.000781714	3.96524e-08	0.348061	0.490853	0.0820452	0.0231116	0.823484	4.87122e-20	1.11404e-10	0.899159	0.300847
655	X - 13431	1656	TRUE	-1.44354	0.26497	0.190738	0.326077	0.155519	0.0317543	-0.0351098	-0.00545535	-0.0626841	0.0229823	0.00711216	4.90281e-12	0.000234184	0.00119936	0.0112307	0.259137	0.672532	0.639609	0.94645	0.431871	3.56537e-15	0.202308	0.058702	0.300847
59	1-linoleoylglycerol (18:2)	1656	TRUE	-1.67483	-0.0262626	0.184028	0.403226	0.178475	-0.133693	0.0259087	0.111444	0.0313	0.0206128	0.0218172	1.16719e-15	0.715628	0.00179484	0.00173358	0.195729	0.0754145	0.729931	0.170429	0.694977	1.76962e-12	9.32184e-05	0.912122	0.300847
173	2-palmitoyl-GPE (16:0)*	1656	TRUE	-0.732262	0.134086	0.18591	-0.128774	-0.204284	0.024968	0.000356621	0.107627	0.0819989	0.0164931	-0.00811095	0.000580979	0.0675954	0.00193936	0.32561	0.14562	0.74422	0.996275	0.193297	0.312786	2.95334e-08	0.15344	0.523809	0.300847
513	prolylproline	1656	TRUE	-0.965791	0.0741186	0.182194	-0.272186	-0.179239	-0.0654364	0.0573391	-0.115451	0.062272	0.0028144	0.0312845	5.13562e-06	0.310052	0.00227395	0.0368302	0.199538	0.390244	0.450658	0.160881	0.441172	0.341819	3.16258e-08	0.722863	0.300847
112	1-palmitoylglycerol (16:0)	1656	TRUE	-2.23203	0.0114421	0.172588	0.145076	0.150123	-0.155452	-0.0234202	0.0968735	0.0833792	0.0244946	0.0367248	3.01363e-27	0.872246	0.00301121	0.253529	0.270213	0.03622	0.751882	0.227334	0.289942	2.07509e-17	2.66397e-11	0.958537	0.300847
167	2-oleoylglycerol (18:1)	1656	TRUE	-1.88351	0.0152457	0.170403	0.235853	0.0996508	-0.00664568	0.0916062	0.136104	0.138529	0.0173222	0.0341859	1.94812e-19	0.832317	0.00379832	0.0666009	0.469533	0.929494	0.221698	0.0937147	0.0823074	2.97891e-09	8.78401e-10	0.947911	0.300847
67	1-margaroyl-GPC (17:0)	1656	TRUE	-0.584891	-0.00545743	0.165287	0.0526631	0.0158311	0.136707	0.0185403	0.152015	-0.0179801	0.0275788	-0.0362907	0.00429534	0.938382	0.00418972	0.676128	0.906711	0.0633937	0.800842	0.0562125	0.818089	5.75419e-22	3.19664e-11	0.98183	0.300847
161	2-linoleoylglycerol (18:2)	1656	TRUE	-1.22495	-0.0358176	0.171748	0.20643	0.0807836	-0.00170831	0.209688	0.203164	0.0238688	0.0148794	0.0127732	8.7825e-09	0.625537	0.00420876	0.115226	0.56515	0.982197	0.00606418	0.0141036	0.768987	5.74355e-07	0.0246338	0.879259	0.300847
171	2-palmitoylglycerol (16:0)	1656	TRUE	-1.45837	-0.0145677	0.167477	0.0945979	0.26172	-0.187353	-0.0262336	-0.0351367	0.0989882	0.0146032	0.0275032	3.90485e-12	0.840587	0.00468045	0.464491	0.0589619	0.0131391	0.727896	0.667051	0.217083	6.60932e-07	9.43085e-07	0.947911	0.300847
741	X - 24065	1656	TRUE	0.711037	-0.20377	0.168105	-0.0355264	-0.400157	0.0728435	0.0287485	-0.0428168	-0.0925514	-0.00426852	-0.0190797	0.000827831	0.00543961	0.00503504	0.786076	0.00433426	0.340764	0.706393	0.604499	0.254198	0.150995	0.000777636	0.314661	0.300847
114	1-palmitoyl-GPE (16:0)	1656	TRUE	-0.874122	0.141334	0.163079	-0.430176	-0.0777918	0.0447741	0.00165539	0.114791	0.0812758	0.0209052	-0.0112311	3.46358e-05	0.0520963	0.00612311	0.000930413	0.57637	0.555256	0.982566	0.161847	0.313107	1.38931e-12	0.0462742	0.492897	0.300847
624	X - 11871	1656	TRUE	0.0517602	-0.0379907	0.16221	-0.0987032	0.178847	0.0729034	0.131054	0.045127	-0.0632819	0.00728568	-0.0202026	0.807901	0.604639	0.00685673	0.451267	0.202757	0.34085	0.0862456	0.585519	0.436075	0.0143407	0.000378161	0.875397	0.300847
135	1-stearoyl-GPE (18:0)	1656	TRUE	-1.49115	0.10758	0.160049	-0.264564	0.104678	0.0115057	-0.011287	0.0800688	0.00650668	0.0221624	0.0113018	1.39375e-12	0.138102	0.00697012	0.0411233	0.450818	0.879152	0.881203	0.327737	0.935444	4.92869e-14	0.0442787	0.608414	0.300847
459	N-acetyltyrosine	1656	TRUE	-1.88771	-0.0792544	-0.157046	0.422207	0.174716	-0.108265	-0.170912	-0.234168	-0.0412255	0.0166128	0.0460041	7.01973e-20	0.266234	0.00705042	0.000910429	0.200254	0.145396	0.0212816	0.00358136	0.601484	9.07652e-09	7.92029e-17	0.714252	0.300847
63	1-linoleoyl-GPI (18:2)*	1656	TRUE	-0.514792	-0.0204051	0.161988	-0.0285792	-0.111893	-0.0560922	0.0686361	-0.126368	-0.0688799	0.00815683	0.00368477	0.0162606	0.782286	0.00729357	0.828402	0.428413	0.466454	0.371938	0.129129	0.399547	0.00644499	0.51937	0.944268	0.300847
182	3-carboxy-4-methyl-5-propyl-2-furanpropanoate (CMPF)	1656	TRUE	-1.53689	0.120558	0.155367	0.099976	0.270997	0.0956283	0.221917	-0.0491266	0.0384489	0.0301451	-0.0055277	7.9779e-14	0.089095	0.00736541	0.429767	0.0457991	0.196047	0.00264587	0.538985	0.624355	1.02136e-25	0.314161	0.550651	0.300847
503	pimelate (heptanedioate)	1656	TRUE	-0.837537	-0.0583206	0.160606	0.178258	-0.275767	-0.186584	-0.12122	-0.169697	-0.031567	0.00939214	0.0172487	8.79034e-05	0.428192	0.00761813	0.175046	0.050254	0.0150974	0.113694	0.040929	0.698547	0.00165183	0.00248217	0.79703	0.300847
368	glycylphenylalanine	1656	TRUE	-0.94243	0.0463006	0.159027	-0.352317	-0.115157	-0.0486249	0.10643	0.0335324	0.17417	0.00720131	0.0195958	9.16973e-06	0.527211	0.00790618	0.00705278	0.411187	0.524402	0.162705	0.684708	0.0317188	0.0153013	0.000550134	0.863358	0.300847
638	X - 12442	1656	TRUE	-1.18135	-0.119291	-0.15686	0.128186	-0.136609	-0.202007	-0.0979413	-0.131708	-0.0926427	0.0241405	0.0040126	1.85762e-08	0.0993819	0.00804495	0.321371	0.324048	0.0074688	0.193754	0.106676	0.247792	1.97131e-16	0.47419	0.583869	0.300847
284	cholesterol	1656	TRUE	-2.62055	-0.26163	0.149163	-0.0934623	0.0162235	0.0539193	0.0871067	-0.000912885	-0.0389444	0.0406761	0.0199536	6.48004e-39	0.000157113	0.00840131	0.449576	0.90252	0.455218	0.226776	0.99067	0.611399	1.37604e-47	0.000197805	0.058702	0.300847
145	2-arachidonoylglycerol (20:4)	1656	TRUE	-0.900132	0.0296081	0.156522	0.151544	0.183974	-0.141676	0.130198	-0.109018	-0.127072	0.0113603	0.0119381	2.38068e-05	0.686747	0.00912208	0.247709	0.190361	0.0643199	0.0884969	0.187941	0.118042	0.000135693	0.0357767	0.899159	0.302622
85	1-oleoylglycerol (18:1)	1656	TRUE	-2.32672	0.0694858	0.150346	0.352301	0.133243	-0.0947651	-0.0522942	0.139473	0.0652227	0.0232513	0.0419712	7.40052e-30	0.3254	0.00925574	0.0052336	0.324384	0.198519	0.477141	0.0800549	0.404488	4.84515e-16	1.72451e-14	0.733806	0.302622
119	1-pentadecanoyl-GPC (15:0)*	1656	TRUE	-1.09393	0.0278333	0.149451	-0.117426	-0.237047	0.110769	-0.10439	0.0960918	-0.0323829	0.0263385	-0.0113959	1.20759e-07	0.696042	0.0102992	0.355998	0.0820765	0.136089	0.159306	0.231701	0.681454	7.72787e-20	0.0388989	0.905535	0.322709
531	serotonin	1656	TRUE	1.00643	0.000520899	0.149322	-0.143824	-0.0988007	0.0209099	0.0978489	-0.0853413	-0.0848302	-0.0038066	-0.0325867	1.47335e-06	0.994231	0.011249	0.263595	0.473594	0.780834	0.192054	0.293555	0.287638	0.192587	5.22499e-09	0.997941	0.338371
61	1-linoleoyl-GPC (18:2)	1656	TRUE	0.641832	-0.0795493	0.147529	-0.191307	0.0124264	0.0992895	0.0278188	-0.00773832	-0.118776	0.00582523	-0.037953	0.00229757	0.27295	0.0128945	0.139817	0.928688	0.189584	0.712685	0.92466	0.139336	0.0477269	1.44487e-11	0.714252	0.362701
51	1-docosapentaenoyl-GPC (22:5n3)*	1656	TRUE	-0.483352	-0.0764616	0.147772	0.180486	0.058244	0.036151	0.0929714	-0.00861598	-0.0579693	0.0165483	-0.0165357	0.0227882	0.296018	0.0135062	0.16715	0.677411	0.635737	0.222269	0.916837	0.474301	2.43894e-08	0.00352319	0.722863	0.362701
449	N-acetylhistidine	1656	TRUE	-1.11654	-0.0502042	-0.145746	0.0763342	0.0371955	0.0660862	0.0146283	0.0146466	0.0282682	0.0251304	-0.00661434	1.12146e-07	0.488839	0.0139868	0.555613	0.788707	0.382404	0.846394	0.857891	0.724867	1.29262e-17	0.239027	0.83731	0.362701
447	N-acetylglutamine	1656	TRUE	-0.652372	-0.0812953	-0.146799	0.296085	0.199574	-0.0174965	-0.0364734	-0.000528457	0.00571333	0.0117698	0.00344356	0.00216948	0.267658	0.0143603	0.0237658	0.155	0.819094	0.632865	0.994902	0.943913	7.56754e-05	0.544351	0.714252	0.362701
163	2-linoleoyl-GPE (18:2)*	1656	TRUE	0.403714	0.048549	0.147609	-0.097427	-0.000483703	-0.0162622	-0.0251947	-0.0614635	-0.0940829	-0.00392613	-0.00811683	0.0604955	0.512515	0.0148743	0.461712	0.997279	0.833423	0.744071	0.462196	0.251717	0.191502	0.157428	0.859219	0.362701
48	1-docosahexaenoylglycerol (22:6)	1656	TRUE	-2.15061	-0.0302295	0.14083	-0.0239038	0.052112	-0.024962	0.149046	-0.0119276	0.0616912	0.034946	0.0114769	1.14901e-25	0.669309	0.0149518	0.849989	0.700411	0.735284	0.0431027	0.881212	0.4312	4.1678e-34	0.0362926	0.890832	0.362701
27	1,7-dimethylurate	1656	TRUE	-1.62775	0.107698	-0.142169	-0.068147	0.102359	-0.243237	-0.0992398	-0.183396	-0.101392	0.019168	0.0311563	5.54238e-15	0.133628	0.0154482	0.59506	0.456273	0.00116351	0.184308	0.0235177	0.202213	4.59408e-11	2.111e-08	0.608414	0.363032
203	3-methylxanthine	1656	TRUE	-0.589265	0.0528768	-0.143756	-0.428226	-0.187402	-0.174592	-0.038332	-0.0310552	0.0546438	0.00785528	0.0108494	0.00536355	0.46853	0.015939	0.00101058	0.179413	0.0217588	0.613735	0.705795	0.49872	0.00791514	0.0548114	0.824796	0.363215
690	X - 17189	1656	TRUE	-0.301734	-0.0488482	-0.140871	-0.305451	-0.152637	0.00697053	-0.00390764	-0.0452625	-0.01235	0.00641474	0.00142297	0.159033	0.508307	0.019642	0.0205372	0.28007	0.927897	0.959463	0.586784	0.879951	0.0321776	0.803519	0.857172	0.402139
383	HWESASXX*	1656	TRUE	-0.631125	0.100205	0.139712	-0.198211	0.0959983	-0.059576	0.0933693	-0.160474	0.0153678	-0.00055381	0.0248587	0.0029927	0.171502	0.0197128	0.129841	0.493603	0.435755	0.221013	0.0521615	0.84979	0.852153	1.18745e-05	0.64567	0.402139
136	1-stearoyl-GPI (18:0)	1656	TRUE	-0.856818	0.0177076	0.139751	0.0663506	0.0590921	-0.0598642	0.028404	-0.0318985	0.0368067	0.0109698	0.0100366	5.83103e-05	0.809549	0.0199994	0.613044	0.674262	0.434734	0.710386	0.700251	0.650973	0.000231387	0.0777724	0.947911	0.402139
76	1-myristoylglycerol (14:0)	1656	TRUE	-2.57348	0.0584515	0.133117	0.146899	0.0728475	-0.05243	-0.0856275	0.0440142	0.0273935	0.0293777	0.0407512	1.59206e-36	0.405547	0.0205161	0.241745	0.588009	0.474457	0.241845	0.578635	0.724816	6.39109e-25	7.03483e-14	0.779837	0.402139
620	X - 11795	1656	TRUE	-0.718075	0.100945	-0.137202	0.83783	0.319292	0.0081199	-0.0711925	-0.00179505	-0.141193	0.0084954	0.0115642	0.000647994	0.164214	0.0207546	1.00828e-10	0.0214846	0.914574	0.346019	0.9825	0.078897	0.00388868	0.039632	0.641242	0.402139
170	2-palmitoleoyl-GPC (16:1)*	1656	TRUE	-1.12386	0.0204563	0.138118	-0.107873	-0.114667	0.121308	0.0175699	-0.00430893	0.12943	0.0111796	0.0181986	1.16769e-07	0.77963	0.0208556	0.408631	0.412421	0.111677	0.81744	0.95832	0.109867	0.000162542	0.0013091	0.944268	0.402139
172	2-palmitoyl-GPC (16:0)*	1656	TRUE	-1.10323	-0.0137545	0.135754	0.0706908	-0.194517	0.0595824	0.151145	0.0750697	0.279249	0.0131076	0.0112598	1.95121e-07	0.850695	0.0230731	0.587977	0.164184	0.434389	0.0469427	0.362305	0.000558044	9.70267e-06	0.0466374	0.953387	0.418722
84	oleoyl-linoleoyl-glycerol (18:1/18:2) [2]	1656	TRUE	-1.85779	0.158439	0.13311	0.20085	0.213972	-0.0278883	-0.032284	-0.0138067	-0.0196165	0.0124544	0.0460242	4.48222e-19	0.0272342	0.0232706	0.116969	0.119132	0.709433	0.665606	0.864515	0.804986	1.86402e-05	1.21162e-16	0.44522	0.418722
705	X - 21353	1656	TRUE	-0.99549	-0.140327	-0.134273	0.329867	-0.168406	-0.2146	-0.0862831	-0.164382	-0.121116	0.022007	0.00116523	2.1718e-06	0.052724	0.0233861	0.0107668	0.224397	0.00451011	0.252576	0.044196	0.131057	6.77922e-14	0.83547	0.492897	0.418722
328	etiocholanolone glucuronide	1656	TRUE	1.25773	0.0558683	-0.132895	0.446959	-0.0936777	0.00559986	0.0455184	0.0153551	0.0220225	-0.02597	0.00268593	1.98957e-09	0.439484	0.0245058	0.000533088	0.498147	0.940783	0.545179	0.850556	0.783162	7.84991e-19	0.631318	0.804116	0.419133
82	oleoyl-linoleoyl-glycerol (18:1/18:2) [1]	1656	TRUE	-1.55171	0.166307	0.132272	0.199062	0.287845	-0.08968	-0.0452696	-0.0461962	-0.0693691	0.00755081	0.0449754	1.32154e-13	0.0213218	0.0251214	0.122775	0.0373073	0.233978	0.547205	0.570661	0.385812	0.00994336	9.06764e-16	0.44522	0.419133
176	2-stearoyl-GPE (18:0)*	1656	TRUE	-1.14811	0.0469646	0.133839	0.016326	-0.108153	-0.12569	-0.0243684	0.061756	-0.0114874	0.0149622	0.0143846	6.77304e-08	0.521838	0.0255818	0.900766	0.440806	0.100306	0.749552	0.455153	0.887486	4.84542e-07	0.0113086	0.862539	0.419133
651	X - 12824	1656	TRUE	-1.49801	-0.0132624	-0.130385	0.224726	-0.169011	-0.199663	-0.176881	-0.142709	0.0273411	0.0280371	0.00778545	5.41817e-13	0.852989	0.0258701	0.0786734	0.21717	0.0074843	0.0176001	0.0770381	0.730095	4.42044e-22	0.160159	0.954535	0.419133
468	N-palmitoyl-sphingosine (d18:1/16:0)	1656	TRUE	-2.2265	-0.0806125	0.127756	0.112392	0.0881745	0.0450484	-0.0839397	-0.0379905	-0.0964298	0.0321469	0.0230992	1.68931e-27	0.253746	0.0269513	0.372867	0.514154	0.54091	0.253657	0.633401	0.217599	3.10578e-29	2.41551e-05	0.714252	0.419133
110	1-palmitoyl-2-stearoyl-GPC (16:0/18:0)	1656	TRUE	-1.04577	-0.141374	0.130235	0.213527	0.00964004	0.0411639	-0.076694	0.0169521	-0.160394	0.0246034	-0.00792497	5.89979e-07	0.0501281	0.0273101	0.0975417	0.94435	0.584515	0.307377	0.835006	0.0447449	4.20236e-17	0.156248	0.492897	0.419133
261	asparagine	1656	TRUE	0.453187	0.0116446	-0.130983	0.0630812	-0.127303	-0.215885	-0.201597	-0.101422	-0.294011	0.00927873	-0.0285954	0.0321965	0.873135	0.0280373	0.628088	0.361629	0.00453928	0.00792297	0.217486	0.000271631	0.00170235	4.13025e-07	0.958537	0.419133
356	glycerol 3-phosphate	1656	TRUE	0.3591	0.0278166	-0.131169	-0.260777	-0.0724107	0.0178102	0.0245292	0.0752308	-0.0111709	0.00603953	-0.0254651	0.093521	0.706243	0.0297232	0.0478381	0.608134	0.817041	0.749537	0.366046	0.891272	0.0435781	8.3858e-06	0.905535	0.419133
722	X - 22764	1656	TRUE	-1.09987	-0.0595345	-0.127936	0.18938	-0.136405	-0.314578	-0.271746	-0.123736	-0.149469	0.0229841	0.00550492	1.40934e-07	0.408429	0.029802	0.140847	0.322264	2.81946e-05	0.000289601	0.127625	0.0608873	3.53264e-15	0.323672	0.779837	0.419133
243	7-methylxanthine	1656	TRUE	-0.176032	0.0455545	-0.130054	-0.233504	-0.133438	-0.114981	0.0656033	-0.0284119	-0.00653384	0.000869962	0.00719107	0.408795	0.535145	0.0303501	0.0750356	0.342445	0.133443	0.390962	0.731608	0.935974	0.770228	0.206221	0.863581	0.419133
728	X - 23293	1656	TRUE	-1.0954	-0.0590784	-0.128594	0.257082	-0.172605	-0.152981	-0.139019	-0.133451	-0.0155009	0.0226413	0.00231895	2.07755e-07	0.416534	0.0305486	0.0477147	0.214804	0.0437074	0.0663045	0.10366	0.847341	1.60817e-14	0.680518	0.785047	0.419133
397	isoleucylvaline	1656	TRUE	-0.36447	0.165177	0.129974	-0.220253	0.209726	0.0521375	0.219295	-0.0797672	0.106812	-0.000925974	0.0112528	0.0882197	0.0249856	0.0309789	0.0941443	0.136908	0.497565	0.00425479	0.337097	0.190508	0.756635	0.0486371	0.44522	0.419133
129	1-stearoyl-2-linoleoyl-GPE (18:0/18:2)*	1656	TRUE	-1.43103	0.108955	0.128339	-0.225015	0.106819	-0.00378254	-0.023575	0.0372071	-0.128894	0.011464	0.0323115	1.24672e-11	0.134529	0.0310896	0.0834932	0.44325	0.960277	0.755783	0.650437	0.109868	0.000103138	1.00374e-08	0.608414	0.419133
113	1-palmitoyl-GPC (16:0)	1656	TRUE	-1.36239	-0.00915392	0.127252	0.101845	-0.101071	0.0175269	-0.0767349	0.0846969	-0.00860245	0.0237389	0.00448973	8.98079e-11	0.899431	0.0316548	0.431025	0.465864	0.816553	0.308863	0.299784	0.914585	6.34333e-16	0.423516	0.967628	0.419133
251	alpha-hydroxyisovalerate	1656	TRUE	-0.961602	0.0908572	-0.125733	0.764884	0.163015	-0.0743804	-0.161957	-0.0711607	-0.0605271	0.00187169	0.0364155	4.00942e-06	0.206245	0.0324111	2.53785e-09	0.235968	0.321201	0.0304514	0.380035	0.447001	0.520789	6.11276e-11	0.697494	0.419133
162	2-linoleoyl-GPC (18:2)*	1656	TRUE	0.667192	-0.0174178	0.128683	0.0486586	-0.11088	-0.0426466	-0.049146	0.0222793	-0.0845007	-0.00072324	-0.0245215	0.00177645	0.812883	0.0324434	0.71114	0.431003	0.578468	0.52117	0.788327	0.299697	0.808477	1.68672e-05	0.947911	0.419133
704	X - 21343	1656	TRUE	-1.17737	-0.0914958	-0.126166	0.23165	-0.250444	-0.24871	-0.108123	-0.133649	-0.148929	0.0216326	0.00934004	2.01325e-08	0.205862	0.0328841	0.0728703	0.0703643	0.000978599	0.151023	0.101306	0.062947	1.63092e-13	0.0954434	0.697494	0.419133
615	X - 11537	1656	TRUE	0.423052	-0.0550359	0.126015	-0.127876	-0.00363897	0.082979	0.125652	-0.0252272	0.174523	0.00543232	-0.0315514	0.0465091	0.452432	0.0353648	0.328232	0.979287	0.277457	0.0994022	0.76006	0.0314169	0.0674043	2.67214e-08	0.815897	0.422886
68	1-margaroyl-GPE (17:0)*	1656	TRUE	-0.504805	0.133562	0.125404	0.0640625	-0.18179	-0.140602	-0.205084	-0.0888548	-0.215636	0.0175423	-0.0118627	0.0172219	0.0674872	0.0357571	0.623333	0.193415	0.0649995	0.00700202	0.280757	0.00767823	3.17428e-09	0.0360124	0.523809	0.422886
117	1-pentadecanoyl-2-linoleoyl-GPC (15:0/18:2)*	1656	TRUE	-1.13893	0.0199953	0.121795	-0.411226	-0.357701	0.0643882	-0.0111159	-0.0541408	-0.13894	0.0251356	-0.00507563	4.11469e-08	0.779923	0.0373739	0.00128992	0.00899508	0.388354	0.88139	0.50229	0.0795271	4.6225e-18	0.359772	0.944268	0.422886
224	5-acetylamino-6-amino-3-methyluracil	1656	TRUE	-1.06792	0.0768151	-0.123543	0.105348	0.128264	-0.105329	-0.0842363	-0.0795768	-0.0710718	0.0174639	0.0101048	3.97045e-07	0.290005	0.0373984	0.416406	0.355841	0.164245	0.265042	0.331049	0.376627	2.98258e-09	0.0723051	0.722863	0.422886
178	3-(3-hydroxyphenyl)propionate	1656	TRUE	0.433433	-0.165755	-0.125513	-0.022674	0.0708826	-0.096007	-0.089565	-0.137427	-0.112739	-0.00374896	-0.00406401	0.0429555	0.024717	0.0375347	0.863404	0.615747	0.212381	0.243767	0.0987199	0.167751	0.210333	0.477116	0.44522	0.422886
521	pyrraline	1656	TRUE	-0.954888	0.171513	0.123291	-0.11366	-0.185866	-0.228272	-0.29287	-0.231469	-0.266464	0.0143296	0.0153535	6.01432e-06	0.0183498	0.03812	0.381422	0.181657	0.00261863	0.000109568	0.00476599	0.00093602	1.17726e-06	0.00641083	0.44522	0.422886
149	2-docosahexaenoyl-GPC (22:6)*	1656	TRUE	-0.916126	-0.0148722	0.122522	-0.0150263	0.0514847	0.0125938	0.0455695	-0.0138074	0.0397641	0.0265422	-0.0193195	1.28752e-05	0.837219	0.0384397	0.907455	0.710126	0.867536	0.54539	0.865687	0.619832	1.53133e-19	0.000569001	0.947911	0.422886
147	2-arachidonoyl-GPE (20:4)*	1656	TRUE	-0.307821	0.114865	0.124979	-0.0652499	0.0138572	0.073644	0.0962481	0.0979402	0.0900849	-0.000601577	0.00835292	0.151265	0.120273	0.0386851	0.621131	0.921973	0.33961	0.211131	0.240123	0.271163	0.840962	0.144634	0.608414	0.422886
49	1-docosahexaenoyl-GPC (22:6)*	1656	TRUE	-1.26152	-0.0216241	0.119342	-0.223335	0.0075935	0.0477811	0.0513481	-0.030724	-0.0266654	0.0362523	-0.0246945	7.83536e-10	0.759788	0.0390298	0.0769803	0.955254	0.51718	0.485552	0.70007	0.733478	1.24961e-36	6.53214e-06	0.929379	0.422886
561	taurochenodeoxycholate	1656	TRUE	0.485689	0.0701886	0.124964	-0.083044	0.166606	-0.0710616	-0.0688596	-0.183682	-0.108393	-0.0031429	-0.0109016	0.0238536	0.343471	0.0391269	0.530205	0.239941	0.357841	0.372007	0.0279235	0.186435	0.295508	0.0574614	0.746643	0.422886
56	1-linolenoylglycerol (18:3)	1656	TRUE	-2.0677	0.0328427	0.120273	0.319346	0.219854	-0.0259589	-0.0215105	0.203509	0.0261192	0.0201736	0.0373634	2.49126e-23	0.646538	0.0399799	0.0125208	0.10866	0.728228	0.772966	0.0117445	0.741887	3.74267e-12	1.62845e-11	0.885043	0.422886
612	X - 11491	1656	TRUE	-1.27984	0.156129	0.122451	0.238336	-0.00358936	-0.0934517	-0.0384857	-0.0565768	-0.086976	0.00698252	0.0358812	1.4698e-09	0.0323217	0.0400561	0.0672776	0.979484	0.219364	0.612301	0.491592	0.281557	0.0182403	2.13517e-10	0.449535	0.422886
41	1-arachidonoyl-GPI (20:4)*	1656	TRUE	-1.22905	0.0131019	0.122251	0.0229897	0.245969	-0.0689817	0.00780905	-0.0747915	-0.0630996	0.0148655	0.0180122	6.83854e-09	0.857763	0.0408245	0.860204	0.0786908	0.365666	0.918276	0.364297	0.435684	5.30907e-07	0.00146613	0.955612	0.422886
101	palmitoyl-linoleoyl-glycerol (16:0/18:2) [1]*	1656	TRUE	-1.84335	0.146617	0.118909	0.267812	0.21718	-0.148001	-0.0598389	-0.0115844	-0.036876	0.0101588	0.0517616	4.44103e-19	0.0394346	0.0410514	0.0351288	0.110855	0.0462419	0.419419	0.885262	0.639911	0.000432637	6.09012e-21	0.459696	0.422886
185	3-hydroxybutyrate (BHBA)	1656	TRUE	-1.16165	0.0177569	-0.118272	0.34169	-0.338025	-0.195007	-0.210949	-0.210192	-0.0207433	0.0263833	-0.00126157	2.22919e-08	0.804096	0.0433118	0.00751673	0.0136007	0.00901357	0.00464736	0.00922351	0.793563	9.99979e-20	0.820003	0.947911	0.438855
137	1-stearyl-GPC (O-18:0)*	1656	TRUE	1.04193	0.0666426	0.120421	-0.0653996	-0.120971	0.0933487	-0.0474166	-0.00123575	0.0471494	-0.00381167	-0.0352163	8.81016e-07	0.361593	0.0437687	0.616092	0.386789	0.220522	0.532944	0.988031	0.559945	0.198142	4.82107e-10	0.756569	0.438855
90	1-palmitoleoylglycerol (16:1)*	1656	TRUE	-2.9252	0.117021	0.113215	0.143263	0.0481358	0.00408062	-0.0200482	0.129005	0.129607	0.028368	0.0540833	6.57965e-48	0.0914573	0.0458124	0.247216	0.716746	0.955005	0.781211	0.0989685	0.0913829	6.11571e-24	7.3879e-24	0.550651	0.453302
89	1-palmitoleoyl-2-linoleoyl-GPC (16:1/18:2)*	1656	TRUE	-1.30836	0.0826363	0.115966	-0.499302	-0.110052	0.0888509	0.0654558	-0.00822946	-0.0419823	0.0181642	0.0130775	3.00313e-10	0.248427	0.0475928	9.4057e-05	0.421818	0.234162	0.379864	0.918818	0.596429	3.93633e-10	0.018357	0.71238	0.454881
187	3-hydroxyhippurate	1656	TRUE	-0.507528	-0.1199	-0.11898	0.214621	-0.0161248	-0.0773304	-0.0997481	-0.12309	-0.104086	0.0119858	0.000368535	0.0173764	0.103034	0.0478504	0.102198	0.908778	0.313434	0.192646	0.137774	0.2012	5.84029e-05	0.948412	0.584169	0.454881
484	palmitoyl sphingomyelin (d18:1/16:0)	1656	TRUE	-1.37603	-0.198303	0.115136	0.0142672	-0.367749	-0.00617695	-0.0407927	-0.0696201	-0.0975702	0.0320834	-0.00857946	2.73148e-11	0.00535701	0.0479851	0.910664	0.00695918	0.933726	0.582153	0.385977	0.215944	1.10983e-28	0.119805	0.314661	0.454881
11	1-(1-enyl-palmitoyl)-GPC (P-16:0)*	1656	TRUE	0.0749816	0.0261931	0.118379	0.10797	-0.166181	0.109904	-0.000358428	0.0728194	0.103777	0.010484	-0.0276337	0.724576	0.721017	0.0483916	0.409744	0.236418	0.150872	0.996255	0.378678	0.201345	0.00042367	1.14847e-06	0.915411	0.454881
589	vanillylmandelate (VMA)	1656	TRUE	-1.86771	0.076635	0.113064	0.110985	0.0574411	0.0516003	0.0732258	0.0417129	0.143409	0.0376486	-0.00664003	1.01485e-19	0.279351	0.0509349	0.380289	0.671757	0.484992	0.320774	0.60158	0.0675216	3.03589e-39	0.226197	0.714252	0.463688
389	imidazole propionate	1656	TRUE	-0.543261	-0.0760557	-0.116762	0.458669	0.114968	-0.0545234	-0.0837598	-0.145609	-0.193315	-6.36652e-05	0.0257818	0.0106202	0.299389	0.0513501	0.000456964	0.412341	0.475716	0.272305	0.0781116	0.0172146	0.982908	5.57056e-06	0.722863	0.463688
550	stearidonate (18:4n3)	1656	TRUE	-1.88382	-0.0234493	-0.11128	0.275292	-0.167606	-0.313897	-0.320155	-0.134292	-0.166228	0.0328916	0.016565	2.37363e-20	0.738501	0.0526669	0.0281743	0.212405	1.834e-05	1.19729e-05	0.0900128	0.0325817	7.55574e-31	0.00232726	0.917939	0.463688
134	1-stearoyl-GPC (18:0)	1656	TRUE	-1.23651	-0.106949	0.113664	0.0848449	0.177699	0.0563597	-0.104771	0.0619358	-0.0641212	0.0226186	0.00241662	3.54263e-09	0.138448	0.0541214	0.510386	0.198279	0.454154	0.163273	0.446755	0.422433	1.0976e-14	0.665555	0.608414	0.463688
667	X - 15486	1656	TRUE	-1.43394	0.0737127	-0.113182	0.343228	0.101398	-0.162506	-0.0577432	-0.076763	-0.000436539	0.00316748	0.0523583	7.33738e-12	0.306898	0.0550099	0.00771398	0.462638	0.0308135	0.442004	0.345414	0.99564	0.278916	7.20875e-21	0.722863	0.463688
429	myristoleate (14:1n5)	1656	TRUE	-1.69494	-0.0705765	-0.110424	0.109366	-0.270912	-0.305399	-0.319674	-0.122414	-0.127337	0.0300325	0.0150971	1.45487e-16	0.318337	0.0561908	0.386504	0.0453117	3.47852e-05	1.41492e-05	0.124838	0.103962	1.16287e-25	0.0058498	0.73129	0.463688
46	1-dihomo-linolenylglycerol (20:3)	1656	TRUE	-1.70077	-0.130948	0.112878	0.02975	0.276339	-0.0773652	0.145657	0.052166	0.0700863	0.0150688	0.0341819	6.49513e-16	0.0711053	0.0570686	0.818383	0.0465495	0.306668	0.0538159	0.523766	0.383012	3.02615e-07	1.18066e-09	0.523809	0.463688
592	X - 02269	1656	TRUE	-0.170772	0.0698085	0.110827	0.0687267	0.240856	0.0386993	0.128384	-0.00346244	-0.0820179	0.0206027	-0.0371899	0.408753	0.327224	0.0571264	0.589085	0.0773106	0.602588	0.0835049	0.96563	0.298559	9.98463e-13	1.59406e-11	0.734545	0.463688
487	paraxanthine	1656	TRUE	-0.893576	0.129194	-0.113366	-0.0150854	0.082321	-0.302558	-0.192524	-0.195104	-0.181149	0.00833189	0.0258798	2.48045e-05	0.0769434	0.057668	0.907924	0.555888	7.15807e-05	0.011351	0.0178597	0.025113	0.00490809	4.77131e-06	0.523809	0.463688
142	2-aminoheptanoate	1656	TRUE	-1.45401	0.137968	0.112512	0.381591	0.251581	-0.0432452	-0.00770335	-0.0574732	-0.0056403	0.00849606	0.0383291	4.97335e-12	0.0572662	0.0579165	0.00323081	0.0700198	0.567783	0.918782	0.482487	0.944039	0.00388513	9.11345e-12	0.492897	0.463688
482	palmitoyl dihydrosphingomyelin (d18:0/16:0)*	1656	TRUE	-1.36952	-0.156664	0.111186	-0.281083	-0.283947	-0.0176277	0.0315184	0.0315869	-0.0979549	0.0261165	0.00218979	5.10683e-11	0.0292771	0.0584836	0.0285138	0.0389615	0.814109	0.67359	0.696753	0.218392	3.21312e-19	0.694036	0.449535	0.463688
568	theophylline	1656	TRUE	-0.785108	0.114072	-0.112848	-0.195038	0.148698	-0.218995	-0.0746105	-0.115626	-0.0770763	0.00731671	0.0206883	0.000217566	0.119064	0.0593019	0.135573	0.288314	0.00412077	0.327446	0.161214	0.341539	0.0136797	0.000262253	0.608414	0.463688
628	X - 12063	1656	TRUE	-3.28601	0.0630079	0.101048	0.170031	-0.0100984	0.00716943	0.0500185	-0.0238388	0.05626	0.0123897	0.101794	6.9777e-67	0.336484	0.0593961	0.146357	0.935838	0.916498	0.463627	0.747107	0.438317	3.14867e-06	2.05755e-89	0.74204	0.463688
367	glycylglycine	1656	TRUE	-0.691545	-0.116308	-0.112773	-0.0724746	-0.126778	-0.0277594	-0.00028198	0.118721	-0.00610276	0.00896831	0.0105927	0.00117961	0.11347	0.0605148	0.580718	0.367261	0.717233	0.997059	0.151961	0.940213	0.0026141	0.0627101	0.605173	0.463688
188	3-hydroxyisobutyrate	1656	TRUE	-1.64688	-0.0390487	-0.109097	0.712956	-0.225755	-0.160476	-0.19279	-0.224305	-0.174825	0.0263942	0.0179304	1.44432e-15	0.582964	0.0606307	1.97596e-08	0.0971406	0.0305252	0.00921864	0.00516255	0.02642	5.56609e-20	0.00113297	0.871549	0.463688
536	sphingomyelin (d18:1/17:0, d17:1/18:0, d19:1/16:0)	1656	TRUE	-2.04023	-0.122765	0.106414	-0.23695	-0.170248	0.0403287	-0.0677207	-0.0595652	-0.127557	0.0387156	0.00409754	4.56439e-24	0.0773175	0.0611048	0.0562146	0.200477	0.577996	0.349282	0.447249	0.0974085	5.99367e-43	0.446501	0.523809	0.463688
751	X - 24435	1656	TRUE	0.263591	0.0113309	0.110972	0.97475	-0.114078	0.0659424	-0.0495347	-0.025692	-0.0889518	0.00334628	-0.0188388	0.211144	0.876075	0.0617629	5.78199e-14	0.411931	0.384264	0.512567	0.753863	0.268898	0.256054	0.000814863	0.959091	0.463688
415	maleate	1656	TRUE	-1.15695	0.0793662	0.112192	-0.0406926	-0.269095	-0.0679445	-0.173068	-0.214431	-0.17444	0.0169208	0.0154202	5.76604e-08	0.280192	0.0618959	0.756506	0.0556929	0.375464	0.0237026	0.00967638	0.0320733	1.36456e-08	0.00674798	0.714252	0.463688
62	1-linoleoyl-GPE (18:2)*	1656	TRUE	0.0370994	0.0206534	0.112484	-0.0812768	0.0308442	-0.0694384	-0.154621	-0.107848	-0.205007	0.00398675	-0.00636049	0.862843	0.780226	0.0630812	0.538605	0.827612	0.368469	0.0448047	0.196362	0.0123765	0.184091	0.26722	0.944268	0.463688
540	sphingomyelin (d18:1/21:0, d17:1/22:0, d16:1/23:0)*	1656	TRUE	-1.96856	-0.153013	0.106789	-0.366914	-0.122752	0.052198	-0.0283637	-0.0480964	-0.110478	0.0333107	0.0117987	4.99195e-22	0.0295699	0.0632781	0.00347948	0.361673	0.476728	0.698453	0.544211	0.155978	1.58907e-31	0.0302935	0.449535	0.463688
177	2-stearoyl-GPI (18:0)*	1656	TRUE	-0.796183	-0.00203689	0.111429	0.0391733	0.00412234	0.00880941	0.0139777	0.018535	0.124269	0.00837766	0.0119071	0.000189862	0.977901	0.0638202	0.765438	0.976627	0.90856	0.855118	0.82313	0.126948	0.00495811	0.0365442	0.997941	0.463688
156	2-hydroxyoctanoate	1656	TRUE	-0.76211	0.166357	0.111033	0.310769	0.174144	-0.198096	-0.089339	-0.216574	-0.130304	0.00112766	0.0305096	0.000343437	0.0233734	0.0641946	0.0176946	0.214854	0.00964508	0.242179	0.00886057	0.108754	0.704675	7.92393e-08	0.44522	0.463688
64	1-margaroyl-2-linoleoyl-GPC (17:0/18:2)*	1656	TRUE	-0.612524	-0.00545467	0.107387	-0.243286	-0.152363	0.0931477	-0.0122596	0.0411654	-0.134086	0.0275414	-0.0318264	0.00293534	0.938744	0.0642543	0.0549225	0.261957	0.208358	0.868233	0.607061	0.0880053	1.07967e-21	7.06384e-09	0.98183	0.463688
55	1-eicosenoyl-GPC (20:1)*	1656	TRUE	0.0558862	-0.00269088	0.108424	0.0203077	0.223293	0.0431706	0.106628	-0.0256309	-0.0520021	0.0193867	-0.0433798	0.789177	0.970205	0.0656644	0.874567	0.105288	0.565645	0.155124	0.752399	0.514484	3.21642e-11	7.56985e-15	0.997941	0.463688
105	1-palmitoyl-2-meadoyl-GPC (16:0/20:3n9)*	1656	TRUE	-1.60225	-0.0420351	-0.10868	-0.0696582	0.0117245	0.0309248	0.0196443	0.121285	0.0364553	0.0160799	0.0299825	2.09672e-14	0.560662	0.0657756	0.589207	0.93241	0.681526	0.793945	0.136563	0.64859	4.03901e-08	8.38495e-08	0.868604	0.463688
111	palmitoyl-linoleoyl-glycerol (16:0/18:2) [2]*	1656	TRUE	-2.40035	0.182194	0.106132	0.278019	0.130152	-0.0135428	-0.0421956	0.0617907	0.0473061	0.0182736	0.0546421	1.01996e-31	0.0098615	0.0659721	0.0274306	0.335344	0.854092	0.565908	0.437693	0.545095	1.73491e-10	1.63274e-23	0.361071	0.463688
19	1-(1-enyl-stearoyl)-GPC (P-18:0)*	1656	TRUE	0.104635	0.033945	0.111174	0.085232	-0.0681103	-0.0215182	-0.118747	-0.0591483	-0.00085915	0.00617801	-0.0161541	0.625784	0.646238	0.0659768	0.51866	0.63031	0.78029	0.122998	0.478199	0.991629	0.0393861	0.00479805	0.885043	0.463688
730	X - 23369	1656	TRUE	-0.646783	-0.0366619	0.110522	0.259516	0.0936141	-0.0435183	-0.0195163	-0.0918969	-0.0471734	0.00604663	0.013426	0.00260229	0.620461	0.0678754	0.04964	0.508743	0.57308	0.800107	0.271036	0.565	0.0439938	0.0192076	0.875397	0.464601
659	X - 13866	1656	TRUE	-1.6949	0.178992	0.107001	0.200054	0.0842929	0.0161042	0.0624154	-0.0625268	0.092381	0.029727	0.00341602	4.34381e-16	0.012756	0.0686186	0.11903	0.539924	0.82991	0.404175	0.440429	0.245709	1.97281e-24	0.539413	0.417066	0.464601
506	pregnenediol sulfate (C21H34O5S)*	1656	TRUE	1.83971	0.0890509	-0.10336	0.992907	-0.207993	-0.0775536	-0.0354353	-0.0770249	-0.194417	-0.0348896	0.000389709	9.59938e-20	0.201593	0.0698544	1.53657e-15	0.119058	0.286332	0.625474	0.327349	0.0118073	5.59725e-35	0.942476	0.697494	0.464601
403	lactate	1656	TRUE	-0.480409	-0.0476911	-0.108516	0.34534	-0.00977268	-0.0730211	-0.241511	0.00862959	-0.0616901	0.000496574	0.0220525	0.0237329	0.514842	0.0698965	0.00826062	0.944394	0.339048	0.00153396	0.916768	0.446741	0.867177	0.000100822	0.859219	0.464601
265	behenoyl sphingomyelin (d18:1/22:0)*	1656	TRUE	-1.50003	-0.211244	0.107536	-0.0781611	-0.11048	-0.00590702	-0.0559629	-0.0866746	-0.107815	0.0214777	0.0178876	1.11108e-12	0.00364455	0.0702685	0.546882	0.426829	0.937875	0.459399	0.290142	0.180219	3.10157e-13	0.00147927	0.304522	0.464601
727	X - 23026	1656	TRUE	-1.55552	-0.0516031	-0.106867	0.403298	0.0574295	0.0143017	-0.00118743	0.0610436	0.0112064	0.0173155	0.0259459	1.36436e-13	0.476342	0.0712418	0.00182622	0.678719	0.849914	0.98744	0.45502	0.888915	3.78055e-09	3.77241e-06	0.827273	0.464601
483	palmitoyl ethanolamide	1656	TRUE	-0.959795	-0.112373	-0.108017	0.310185	-0.230051	-0.109301	-0.0974317	-0.0359632	-0.0545579	0.0131229	0.014919	6.62833e-06	0.125932	0.0719929	0.0179979	0.101577	0.153578	0.202481	0.664075	0.502224	1.0467e-05	0.00870837	0.608414	0.464601
357	glycerophosphoethanolamine	1656	TRUE	-0.294577	0.141125	0.108555	-0.33518	0.253508	0.0214399	0.0694035	0.0743659	0.0628862	0.00362703	0.000729689	0.169998	0.0564873	0.0727586	0.0111867	0.0733829	0.781179	0.367611	0.37282	0.442767	0.226721	0.898681	0.492897	0.464601
116	1-palmityl-GPC (O-16:0)	1656	TRUE	0.104831	0.0048742	0.108596	0.166333	-0.0932963	-0.0364194	-0.0755904	0.0116286	0.0647937	0.0034884	-0.0119	0.625727	0.947541	0.0729887	0.208609	0.510446	0.637424	0.32703	0.889298	0.429601	0.245532	0.0380747	0.988281	0.464601
708	X - 21444	1656	TRUE	-0.414397	-0.0284708	-0.108682	-0.140698	-0.0604878	-0.0312761	-0.0420781	-0.00324803	-0.0538042	0.00483851	0.00896529	0.054147	0.7011	0.0731215	0.28811	0.669988	0.68604	0.58582	0.969026	0.512415	0.107684	0.118618	0.905535	0.464601
553	suberate (C8-DC)	1656	TRUE	-0.879687	-0.00325046	0.107386	0.0499597	-0.0431342	-0.159555	-0.107811	-0.213137	0.0462896	0.00776335	0.0216802	3.62029e-05	0.964682	0.0735862	0.703103	0.758789	0.0371845	0.158334	0.0100354	0.569037	0.00910545	0.000137133	0.997941	0.464601
230	5-dodecenoate (12:1n7)	1656	TRUE	-1.31015	-0.060257	-0.104908	0.0499659	-0.258301	-0.318735	-0.287058	-0.140875	-0.173814	0.0246701	0.0110622	3.05559e-10	0.400853	0.0736345	0.696447	0.0598404	2.04265e-05	0.000120929	0.0815747	0.0286353	2.20936e-17	0.0464428	0.778469	0.464601
205	3-ureidopropionate	1656	TRUE	0.194686	0.0752479	-0.108194	0.208212	-0.115895	0.0273155	-0.00466577	-0.048777	-0.112089	0.00449962	-0.0152282	0.365759	0.310485	0.0744982	0.116045	0.414321	0.724124	0.951833	0.559916	0.172456	0.134752	0.00804721	0.722863	0.464601
471	oleate/vaccenate (18:1)	1656	TRUE	-1.61877	-0.0582132	-0.10286	0.297132	-0.259876	-0.324874	-0.393643	-0.107569	-0.0864467	0.0290807	0.0139865	2.7188e-15	0.409622	0.0747563	0.0184245	0.0543964	1.02629e-05	8.52036e-08	0.176666	0.268807	3.0438e-24	0.0105292	0.779837	0.464601
743	X - 24125	1656	TRUE	-2.29081	0.124424	0.1029	0.117897	0.18234	0.0147454	0.0631204	0.110641	0.0368411	0.015397	0.0552293	1.30484e-28	0.0803638	0.0769498	0.353476	0.180527	0.842528	0.394185	0.167966	0.640093	9.49245e-08	1.22703e-23	0.52551	0.468685
143	2-aminooctanoate	1656	TRUE	-0.220017	0.12034	0.106824	0.515422	0.141346	-0.121213	0.0244295	-0.0935305	-0.116405	0.00454111	-0.000468271	0.304823	0.10345	0.0770779	9.3931e-05	0.317552	0.115859	0.75085	0.261758	0.154892	0.129682	0.934796	0.584169	0.468685
165	2-methylbutyrylglycine	1656	TRUE	-0.537209	0.044291	0.106048	0.0533498	0.210301	-0.0933881	-0.198739	-0.128082	-0.128111	0.0073282	0.00939482	0.0118817	0.547351	0.0780433	0.684811	0.135407	0.223854	0.00949976	0.122822	0.115988	0.0140773	0.0993515	0.864295	0.468685
73	1-methylxanthine	1656	TRUE	-0.0760524	0.0712995	-0.106289	0.144159	0.0392841	-0.217249	-0.082299	-0.158893	-0.155051	0.00567848	-0.00290516	0.722415	0.33394	0.0781253	0.273941	0.780855	0.00476655	0.284051	0.0562167	0.0577554	0.0577331	0.611231	0.738596	0.468685
411	linolenate [alpha or gamma; (18:3n3 or 6)]	1656	TRUE	-1.56495	-0.0534617	-0.102306	0.257382	-0.207564	-0.314474	-0.317678	-0.0946171	-0.111802	0.0276456	0.0140302	3.34985e-14	0.45225	0.0785297	0.0427042	0.127232	2.24701e-05	1.78424e-05	0.238142	0.155722	9.17922e-22	0.0108653	0.815897	0.468685
72	1-methylurate	1656	TRUE	-0.805551	0.0313651	-0.105057	0.303814	0.0975049	-0.197787	0.0163803	-0.128462	-0.085392	0.0142924	0.00641654	0.000149637	0.668419	0.0793156	0.0201548	0.486527	0.00961513	0.829875	0.119807	0.292292	1.48465e-06	0.257901	0.890832	0.469648
481	palmitoleate (16:1n7)	1656	TRUE	-2.01371	-0.0476397	-0.100558	0.149926	-0.308388	-0.292107	-0.29856	-0.0530689	-0.016369	0.0310439	0.0236496	5.4528e-23	0.497995	0.0802127	0.232358	0.0218811	6.79387e-05	4.51752e-05	0.503253	0.833452	1.28711e-27	1.4023e-05	0.845355	0.471249
50	1-docosahexaenoyl-GPE (22:6)*	1656	TRUE	-1.93952	0.122866	0.101019	-0.235349	-0.0292956	-0.0156408	-0.0243392	-0.086647	0.0391337	0.0367462	0.00146728	3.94537e-21	0.0829371	0.0812312	0.0628897	0.828948	0.832416	0.741459	0.278243	0.617963	1.90298e-37	0.789198	0.528779	0.472349
300	cysteine s-sulfate	1656	TRUE	-0.923878	0.0282651	-0.104187	0.46883	-0.337671	-0.131744	-0.194538	-0.0489718	-0.111437	0.00937341	0.0218995	1.35407e-05	0.699339	0.081656	0.000333821	0.0159	0.0843892	0.0106715	0.552939	0.169096	0.0015855	0.00011173	0.905535	0.472349
478	O-sulfo-L-tyrosine	1656	TRUE	-1.4757	0.0893754	0.10309	0.259961	0.0519475	0.0646894	0.0755926	0.123402	0.118151	0.0232879	0.00622502	2.90183e-12	0.219859	0.0834777	0.0456622	0.709397	0.394582	0.318884	0.13306	0.142991	3.17512e-15	0.269875	0.697494	0.4792
373	gulonate*	1656	TRUE	-1.42916	-0.0663148	-0.100851	0.0812843	0.0216476	-0.0342284	-0.10487	-0.149	0.0946492	0.0172093	0.0241163	7.42135e-12	0.356495	0.0863347	0.526774	0.87501	0.648202	0.161327	0.0661947	0.234635	3.61209e-09	1.4942e-05	0.753088	0.491846
591	X - 02249	1656	TRUE	-1.83582	0.192269	0.100141	-0.0944494	0.0442642	0.0722225	0.000880647	-0.0360797	-0.00580714	0.0253152	0.0189804	1.53349e-18	0.00758461	0.0889704	0.462627	0.748033	0.336297	0.990628	0.656834	0.941943	4.33513e-18	0.000665956	0.361071	0.499059
739	X - 24021	1656	TRUE	-0.153642	0.0566341	0.102404	-0.108944	-0.0134837	-0.074247	-0.0425634	-0.00326043	0.0495812	0.00895624	-0.0126623	0.472959	0.442785	0.0896341	0.408342	0.923923	0.334737	0.579541	0.968746	0.54398	0.00276042	0.0267183	0.806234	0.499059
424	methyl indole-3-acetate	1656	TRUE	-2.27564	0.0618207	0.0985993	0.248136	0.0446881	-0.0260032	-0.00529519	-0.0495399	0.0686563	0.0294723	0.0285312	2.5541e-28	0.38439	0.0897375	0.0505566	0.742463	0.725771	0.942948	0.536513	0.38299	1.50681e-24	2.1803e-07	0.773352	0.499059
34	16a-hydroxy DHEA 3-sulfate	1656	TRUE	0.847207	0.186816	-0.100421	0.314784	-0.102241	0.0632465	0.0700161	0.052149	-0.024167	-0.0213108	0.0080885	5.6962e-05	0.0100236	0.090466	0.0151042	0.461446	0.403293	0.353925	0.523867	0.763544	4.35504e-13	0.150006	0.361071	0.499059
54	1-eicosapentaenoyl-GPE (20:5)*	1656	TRUE	-1.75987	0.140444	0.0999602	-0.0113949	-0.0813931	0.0459338	0.0222809	0.0829036	0.0891344	0.0276053	0.0100543	4.94946e-17	0.0521315	0.0909191	0.929685	0.556415	0.542574	0.767275	0.309371	0.265665	4.78668e-21	0.0726385	0.492897	0.499059
639	X - 12450	1656	TRUE	-1.98927	-0.0389856	-0.0974049	0.199138	-0.185737	-0.276243	-0.215745	-0.131225	-0.0767193	0.0318633	0.0208449	2.79005e-22	0.580965	0.0916547	0.114343	0.169352	0.000177127	0.00334527	0.0994534	0.32661	9.42342e-29	0.00013862	0.871549	0.499452
66	1-margaroylglycerol (17:0)	1656	TRUE	-1.17677	-0.0432216	0.100336	0.258478	0.161908	-0.246282	-0.131461	-0.104302	-0.112268	0.016086	0.0176572	2.75391e-08	0.553791	0.092744	0.0473724	0.246418	0.00121897	0.0836635	0.205158	0.164859	5.49887e-08	0.00178943	0.864295	0.500143
470	octanoylcarnitine (C8)	1656	TRUE	-1.79663	0.021954	-0.096971	0.366639	-0.275146	-0.194341	-0.291296	-0.106303	-0.0638597	0.0332386	0.0096623	1.82285e-18	0.755928	0.0931118	0.00364835	0.0417689	0.00834291	7.44704e-05	0.182003	0.414197	3.85667e-31	0.0773392	0.928853	0.500143
666	X - 15469	1656	TRUE	-1.56101	0.0247012	-0.0969236	0.678175	-0.257141	-0.175069	-0.225998	-0.0963149	-0.0414909	0.0280051	0.00953012	3.45491e-14	0.727847	0.0949106	8.7711e-08	0.0583392	0.0180557	0.00222649	0.228898	0.597584	2.25182e-22	0.083004	0.915411	0.50341
641	X - 12472	1656	TRUE	-0.963347	0.0365633	-0.0999686	-0.101446	-0.0758285	-0.108598	0.0649998	-0.0322394	0.141711	0.0159462	0.00627558	5.88823e-06	0.617877	0.0952761	0.438265	0.588737	0.155472	0.394297	0.696501	0.0807933	8.07448e-08	0.268931	0.875397	0.50341
430	myristoleoylcarnitine (C14:1)*	1656	TRUE	-1.74247	0.0241106	-0.0967318	0.307863	-0.278518	-0.224874	-0.246956	-0.0784005	0.0296021	0.0300326	0.0132147	2.7425e-17	0.734231	0.0957282	0.0151941	0.0404108	0.00240013	0.000837161	0.327614	0.706593	1.82728e-25	0.0162803	0.917178	0.50341
28	10-heptadecenoate (17:1n7)	1656	TRUE	-2.08559	-0.0292961	-0.0945087	0.239451	-0.282577	-0.293368	-0.314589	-0.0920591	-0.0639157	0.0340231	0.0209639	7.43632e-25	0.674814	0.0978488	0.0548059	0.034445	5.6312e-05	1.50824e-05	0.242379	0.408443	2.92457e-33	0.000106022	0.893933	0.504522
25	1,3-dimethylurate	1656	TRUE	-1.12408	0.126513	-0.0986319	-0.115879	0.118389	-0.146546	-0.0116272	-0.0643177	-0.0298609	0.0142871	0.0178808	1.09959e-07	0.0829733	0.0983081	0.373845	0.396532	0.054199	0.878361	0.434473	0.711719	1.37701e-06	0.00155744	0.528779	0.504522
733	X - 23639	1656	TRUE	-0.13943	0.138113	-0.0969718	0.31496	0.109699	0.0578478	0.0419777	0.0148445	-0.00427359	0.0238084	-0.043708	0.502997	0.0542494	0.0983438	0.0139628	0.424313	0.439581	0.574151	0.854443	0.957104	2.77173e-16	3.68901e-15	0.492897	0.504522
180	3,7-dimethylurate	1656	TRUE	-0.983684	0.0864499	-0.0987112	-0.331921	-0.121767	-0.0966924	-0.000503403	-0.0707853	0.147888	0.00484053	0.030092	3.5144e-06	0.236962	0.0986233	0.0109958	0.384024	0.204769	0.994722	0.390531	0.067696	0.102468	1.06605e-07	0.706338	0.504522
538	sphingomyelin (d18:1/20:0, d16:1/22:0)*	1656	TRUE	-1.93799	-0.265159	0.095588	-0.21572	-0.030018	0.0222497	0.00119022	-0.100136	-0.078118	0.028593	0.0204032	5.2238e-21	0.000189087	0.0997673	0.0889706	0.825201	0.76394	0.987158	0.211249	0.320591	3.15545e-23	0.000208126	0.058702	0.506926
80	1-oleoyl-2-docosahexaenoyl-GPC (18:1/22:6)*	1656	TRUE	-0.84614	0.0237816	0.0949078	-0.352983	0.10935	0.12028	0.0791588	-0.0268095	-0.0862146	0.0306928	-0.0301695	3.79989e-05	0.736947	0.101103	0.00523729	0.419587	0.103381	0.282846	0.737037	0.271455	1.12123e-26	3.75605e-08	0.917523	0.507107
78	1-nonadecanoyl-GPC (19:0)	1656	TRUE	0.206199	-0.127797	0.0953434	0.163835	0.0631811	0.0846263	0.0100899	0.0431722	-0.126661	0.0216759	-0.0525152	0.318004	0.0725675	0.101341	0.197364	0.642718	0.254339	0.891688	0.590667	0.108025	5.89058e-14	1.62377e-21	0.523809	0.507107
92	1-palmitoyl-2-adrenoyl-GPC (16:0/22:4)*	1656	TRUE	-1.58947	-0.102989	-0.0968182	-0.0882943	0.150377	-0.00639296	-0.0585805	0.014246	0.022376	0.0137121	0.0362392	3.74993e-14	0.154754	0.101826	0.494498	0.27758	0.932517	0.436902	0.861445	0.780094	2.98124e-06	1.01456e-10	0.626757	0.507107
464	nicotinamide	1656	TRUE	0.0837757	-0.0333089	-0.0985981	0.0161398	0.210477	-0.0464457	-0.110133	-0.0503495	-0.0614329	-0.00305012	0.00587583	0.697473	0.653855	0.104495	0.903152	0.138669	0.548886	0.154405	0.547807	0.455135	0.311238	0.307097	0.88921	0.513653
327	ethylmalonate	1656	TRUE	-1.10222	0.187841	-0.0968584	0.423653	-0.00270965	-0.0914954	-0.0694608	-0.11012	-0.0247933	0.0170111	0.0105788	1.95161e-07	0.0100831	0.10466	0.00115484	0.984525	0.229563	0.360768	0.181046	0.759073	9.12003e-09	0.0613528	0.361071	0.513653
115	1-palmitoyl-GPI (16:0)	1656	TRUE	-1.17221	-0.0162763	0.0973999	0.0222584	-0.123446	-0.0222435	0.0186372	-0.0153781	-0.0172706	0.0128856	0.019442	3.9032e-08	0.824806	0.105189	0.865376	0.380266	0.771795	0.807636	0.852865	0.832006	1.54667e-05	0.000639833	0.947911	0.513653
535	sphingomyelin (d17:1/16:0, d18:1/15:0, d16:1/17:0)*	1656	TRUE	-2.05132	-0.0883461	0.0914928	-0.173107	-0.199689	0.0776617	-0.00523613	-0.0801909	-0.105025	0.038995	0.00294653	2.03555e-24	0.202601	0.106547	0.162062	0.132303	0.28291	0.942173	0.305096	0.17133	9.67097e-44	0.583212	0.697494	0.516924
38	1-arachidonoyl-GPA (20:4)	1656	TRUE	-0.438526	0.0456808	-0.0966504	0.268202	-0.199928	-0.0255076	-0.19901	0.144356	0.0993421	0.00761858	0.00272626	0.0395397	0.533858	0.10742	0.0407999	0.154759	0.739108	0.00923118	0.0812771	0.221772	0.0105039	0.631658	0.863358	0.51782
560	taurine	1656	TRUE	-0.333778	0.0833475	-0.0964918	0.0102831	-0.282111	-0.0387556	-0.204801	0.164192	0.0654857	0.00859176	-0.0027453	0.117987	0.257405	0.108796	0.937628	0.0451446	0.613655	0.00751595	0.0478845	0.421625	0.00398781	0.630053	0.714252	0.518452
748	X - 24293	1656	TRUE	-0.221815	0.041131	-0.0965413	0.467617	-0.0283715	-0.0995617	-0.0749933	-0.122249	-0.0926538	0.00827054	-0.00498265	0.299286	0.576571	0.10893	0.000377614	0.840472	0.195038	0.3281	0.141104	0.255963	0.00562264	0.382441	0.871549	0.518452
200	3-methylglutarylcarnitine (1)	1656	TRUE	-1.84681	0.0945357	0.0940548	0.465648	0.258516	0.00827397	0.0908639	0.0157109	0.17929	0.0175503	0.0326478	1.09243e-18	0.189979	0.110746	0.000299939	0.0610679	0.912432	0.226266	0.846844	0.0247812	1.96717e-09	5.09099e-09	0.68348	0.520796
420	methionine	1656	TRUE	-0.623166	-0.0162084	-0.0955549	0.24083	-0.0406125	-0.11446	-0.0912243	-0.0551904	-0.202399	0.0130809	0.00245838	0.00341564	0.825155	0.111175	0.0660225	0.772367	0.13475	0.232351	0.504743	0.0127254	1.09797e-05	0.665278	0.947911	0.520796
125	1-stearoyl-2-docosahexaenoyl-GPE (18:0/22:6)*	1656	TRUE	-2.43363	0.164067	0.0917593	-0.325247	0.136365	-0.00135902	0.0178215	-0.0320243	-0.0217671	0.0306875	0.0324606	1.35679e-32	0.0200556	0.111701	0.00983653	0.312489	0.985267	0.808303	0.687336	0.780546	7.68992e-27	2.84765e-09	0.44522	0.520796
87	1-oleoyl-GPE (18:1)	1656	TRUE	-0.178673	0.109644	0.0960782	-0.0293658	0.129939	-0.0943326	-0.12903	-0.177571	-0.144252	0.00583702	-0.00215663	0.405671	0.138755	0.112592	0.824274	0.35921	0.222056	0.0942383	0.0334985	0.0785809	0.0519408	0.706933	0.608414	0.520796
323	ergothioneine	1656	TRUE	-0.0709487	-0.100715	-0.0947862	0.242407	-0.351532	-0.00680136	-0.0725983	-0.0322816	-0.195671	0.0104939	-0.0146227	0.739195	0.170343	0.11451	0.0645869	0.0123857	0.929267	0.342448	0.696758	0.0161424	0.000426465	0.0101606	0.64567	0.520796
29	10-nonadecenoate (19:1n9)	1656	TRUE	-1.66528	-0.0464649	-0.090862	0.280751	-0.207333	-0.297473	-0.260789	-0.102616	-0.053396	0.032864	0.00631068	3.69911e-16	0.509516	0.11467	0.0256211	0.124027	5.15874e-05	0.000376603	0.196461	0.493641	1.24497e-30	0.24741	0.857172	0.520796
157	2-hydroxypalmitate	1656	TRUE	-0.309002	-0.0756018	0.0952894	0.253209	0.0134167	-0.0468455	0.0211108	0.0450434	0.0575616	0.0092111	-0.00778611	0.14961	0.306401	0.11486	0.055058	0.924428	0.543466	0.783827	0.588945	0.481884	0.00211796	0.173807	0.722863	0.520796
250	alpha-hydroxyisocaproate	1656	TRUE	-0.726113	0.0746271	-0.0930793	0.959031	0.0356886	-0.235041	-0.226398	-0.207492	-0.182386	0.00738638	0.0196298	0.000529521	0.301465	0.114963	1.03433e-13	0.796223	0.00180884	0.0026034	0.0108476	0.022571	0.0116632	0.000449219	0.722863	0.520796
43	1-arachidoyl-GPC (20:0)	1656	TRUE	1.29732	-0.085534	0.0920775	0.0776446	0.0817394	0.0694928	0.0172173	-0.0719972	-0.0623559	0.00157906	-0.0547688	5.36709e-10	0.235038	0.117941	0.54606	0.553156	0.355009	0.818403	0.375435	0.43433	0.588762	9.46458e-23	0.706338	0.527966
441	N-acetylasparagine	1656	TRUE	0.255523	-0.0682793	-0.0943595	0.200834	-0.101879	-0.207328	-0.044545	-0.0611281	-0.208791	0.000504146	-0.00593791	0.233229	0.355401	0.118276	0.127934	0.471141	0.00713974	0.562502	0.463153	0.0107064	0.866364	0.299407	0.753088	0.527966
452	N-acetylmethionine	1656	TRUE	-0.0960693	0.0385015	-0.094911	-0.0916596	-0.0766411	0.0236945	-0.051603	-0.0288674	0.024867	0.00176863	0.00148048	0.656226	0.604764	0.118652	0.490176	0.590296	0.760094	0.505212	0.730768	0.76274	0.557659	0.797208	0.875397	0.527966
304	decanoylcarnitine (C10)	1656	TRUE	-1.67338	0.0127845	-0.0901974	0.384192	-0.299919	-0.225891	-0.270691	-0.0805414	-0.0375949	0.0313971	0.0082793	4.08155e-16	0.856886	0.119674	0.00240541	0.0270412	0.00225223	0.000244726	0.313721	0.631991	9.02677e-28	0.131573	0.955612	0.529345
305	dehydroepiandrosterone sulfate (DHEA-S)	1656	TRUE	1.75512	0.14639	-0.0887879	0.521538	-0.108045	-0.054099	-0.0977926	-0.0875589	-0.212747	-0.0386908	0.0119772	5.02827e-18	0.0362745	0.12037	2.94678e-05	0.419317	0.458199	0.179094	0.266774	0.00599478	2.08887e-42	0.0269733	0.450655	0.529345
352	glutarate (C5-DC)	1656	TRUE	-0.509981	0.0121804	0.0924075	0.0845723	-0.0350064	-0.106013	-0.198198	-0.0142655	-0.0158382	0.00469006	0.0124578	0.0171114	0.868773	0.12527	0.520596	0.804023	0.168028	0.0098142	0.863765	0.846165	0.116679	0.0291242	0.958537	0.541724
229	5alpha-pregnan-3beta,20beta-diol monosulfate (1)	1656	TRUE	2.48271	-0.0949249	-0.0846129	-0.155505	-0.00622212	0.0936919	0.0788232	0.224542	0.147543	-0.0487844	-0.00169018	8.12692e-37	0.159721	0.125317	0.197084	0.961587	0.183383	0.262097	0.00318601	0.0484274	4.95622e-71	0.746515	0.638885	0.541724
168	2-oleoyl-GPC (18:1)*	1656	TRUE	-0.113115	0.000884441	0.0922435	0.206757	-0.102917	-0.0775604	-0.0183216	-0.0198089	0.0602362	0.00789275	-0.0121507	0.596336	0.990413	0.125346	0.115709	0.464974	0.312417	0.811038	0.811389	0.459884	0.0081847	0.0330586	0.997941	0.541724
318	dopamine 3-O-sulfate	1656	TRUE	-1.02323	0.233476	0.0903205	0.227189	-0.234133	-0.0383762	-0.126998	-0.146158	-0.170644	0.0235702	-0.00574813	1.17958e-06	0.00129695	0.128024	0.0796216	0.0918489	0.612244	0.0928321	0.0741652	0.0337395	1.16317e-15	0.306538	0.162551	0.550137
103	1-palmitoyl-2-linoleoyl-GPE (16:0/18:2)	1656	TRUE	-1.13028	0.106927	0.0907471	-0.285192	-0.0159475	0.0193794	-0.00536194	0.032977	-0.110368	0.0114639	0.0205908	1.02276e-07	0.144049	0.129423	0.0291052	0.909347	0.799628	0.943902	0.689514	0.173274	0.000112219	0.000280927	0.612004	0.55299
699	X - 19141	1656	TRUE	-0.532767	0.0605102	0.091469	-0.00263678	-0.14317	-0.0853418	-0.11502	-0.130089	-0.105595	0.0065421	0.0102695	0.0131903	0.414081	0.131045	0.984098	0.312557	0.269461	0.135904	0.119469	0.198045	0.0294337	0.0735017	0.783591	0.556755
425	methyl-4-hydroxybenzoate sulfate	1656	TRUE	0.826268	0.0183066	0.0891971	-0.830362	-0.181394	-0.0344889	0.00867519	0.133875	-0.0146145	0.000282182	-0.0327371	8.50957e-05	0.800585	0.132259	1.39685e-10	0.190886	0.648239	0.908465	0.101428	0.855499	0.923506	5.47126e-09	0.947911	0.558553
131	1-stearoyl-2-meadoyl-GPC (18:0/20:3n9)*	1656	TRUE	-1.86248	-0.0434778	-0.088044	-0.00168977	0.102776	0.0472796	0.06302	0.101363	0.0743592	0.0166569	0.0379023	3.64498e-19	0.544537	0.1334	0.989477	0.45411	0.527563	0.398848	0.210305	0.349302	1.03308e-08	9.05992e-12	0.864295	0.558553
321	eicosenoate (20:1)	1656	TRUE	-1.47692	-0.0429362	-0.0869882	0.335264	-0.196917	-0.26894	-0.251733	-0.115077	-0.0250367	0.0315863	0.000886363	7.26012e-13	0.545101	0.133762	0.00814254	0.146972	0.000279408	0.000654904	0.150396	0.749985	4.86628e-28	0.871865	0.864295	0.558553
428	myristate (14:0)	1656	TRUE	-1.6704	-0.0547991	-0.086075	0.142793	-0.307399	-0.340326	-0.346245	-0.165615	-0.126149	0.0305943	0.0135105	3.2678e-16	0.437193	0.135543	0.256891	0.0227496	3.73175e-06	2.41282e-06	0.0373286	0.106264	1.04876e-26	0.0133891	0.804116	0.558553
617	X - 11540	1656	TRUE	-2.09365	0.0160076	-0.0864082	0.32728	-0.248557	-0.162732	-0.186316	-0.0861081	0.00870011	0.0299143	0.0261059	2.37303e-24	0.821302	0.135905	0.00970462	0.066826	0.0277128	0.0115619	0.281302	0.911724	2.2444e-25	1.97326e-06	0.947911	0.558553
510	pro-hydroxy-pro	1656	TRUE	-0.999546	0.117922	-0.0879054	0.334325	0.150164	-0.0815494	-0.0813521	-0.0394437	-0.109392	0.0233742	-0.00587259	1.76803e-06	0.101945	0.135925	0.00941181	0.276426	0.278232	0.278465	0.627609	0.170638	1.29856e-15	0.292969	0.584169	0.558553
446	N-acetylglutamate	1656	TRUE	-1.64711	0.126676	0.0873645	-0.275229	-0.241977	-0.0993155	-0.249754	-0.0445501	7.46629e-05	0.0241785	0.0187736	3.06484e-15	0.0783908	0.137633	0.0322248	0.0789123	0.18586	0.000858299	0.583078	0.999252	1.18219e-16	0.000757183	0.52551	0.562502
362	glycocholate	1656	TRUE	0.505818	0.0971262	0.0897252	0.155726	0.209334	-0.0526161	-0.0502117	-0.0744203	-0.127749	-0.00670041	-0.00574338	0.0189006	0.190953	0.139515	0.240297	0.140757	0.497022	0.516078	0.374245	0.120328	0.0260882	0.318044	0.68348	0.567108
551	stearoyl sphingomyelin (d18:1/18:0)	1656	TRUE	-2.64012	-0.156326	0.0836536	-0.206658	-0.119968	0.0203855	0.00923024	-0.0135422	-0.0226882	0.0326633	0.0383559	4.53248e-39	0.0246885	0.141522	0.0963204	0.367666	0.77885	0.898627	0.863006	0.768441	5.54952e-31	1.11055e-12	0.44522	0.567115
472	oleoyl ethanolamide	1656	TRUE	-1.72438	-0.0882356	-0.0857122	0.268028	-0.274785	-0.250714	-0.177638	0.00280201	0.000339392	0.0266784	0.0190237	8.88206e-17	0.216841	0.142306	0.035653	0.0444441	0.000767942	0.016932	0.972258	0.996577	3.3069e-20	0.000586297	0.697494	0.567115
268	beta-hydroxyisovalerate	1656	TRUE	-1.12496	0.0516899	-0.0854375	1.07504	0.0435633	-0.203866	-0.191391	-0.119449	-0.130825	0.00951077	0.0291656	5.35551e-08	0.46841	0.142706	3.04017e-17	0.749467	0.00611514	0.00991526	0.13734	0.0974631	0.00100165	1.27555e-07	0.824796	0.567115
647	X - 12695	1656	TRUE	-1.1418	0.133817	-0.0873608	0.446368	-0.0763977	-0.0592269	-0.171215	-0.0370711	-0.142168	0.018686	0.0101204	6.97332e-08	0.0667506	0.143232	0.000615343	0.584388	0.436624	0.0242495	0.652447	0.0785772	2.72939e-10	0.0734141	0.523809	0.567115
108	1-palmitoyl-2-oleoyl-GPI (16:0/18:1)*	1656	TRUE	-0.748714	0.0802913	-0.0877679	-0.0113983	-0.20835	-0.0299272	-0.0982865	0.0635816	-0.0385278	0.00137572	0.0284066	0.00043362	0.273618	0.143287	0.930643	0.137649	0.695651	0.198005	0.442045	0.635202	0.643656	5.70405e-07	0.714252	0.567115
88	1-oleoyl-GPI (18:1)	1656	TRUE	-0.19822	0.0239135	0.0884279	0.0796853	-0.00165981	-0.0602017	0.027345	-0.013402	-0.0635285	0.00407729	-0.000719305	0.356897	0.747104	0.144733	0.54734	0.990668	0.436422	0.723201	0.872683	0.439147	0.175138	0.900337	0.92102	0.56984
445	N-acetylcitrulline	1656	TRUE	-1.65034	-0.036658	-0.0851776	0.436488	0.204719	0.0243192	-0.0637714	-0.098828	0.0220308	0.0182702	0.0289732	2.85517e-15	0.610813	0.1481	0.000689973	0.137479	0.746189	0.395107	0.223751	0.782387	3.97262e-10	2.06461e-07	0.875397	0.574117
457	N-acetyltaurine	1656	TRUE	-1.56045	0.00761907	-0.0851403	0.489893	-0.106317	0.0580679	-0.0444146	0.0966919	0.216306	0.0188255	0.0212846	8.3533e-14	0.915788	0.148402	0.000140338	0.44065	0.439759	0.553792	0.234065	0.00670635	1.16946e-10	0.000136691	0.976626	0.574117
451	N-acetylleucine	1656	TRUE	-2.03496	0.0525017	-0.0839016	0.676167	0.0297119	-0.107631	-0.15065	-0.169441	-0.0934485	0.0192999	0.0447689	5.31347e-23	0.459784	0.148512	9.74138e-08	0.826949	0.14628	0.0416103	0.0343902	0.234748	2.06568e-11	4.00004e-16	0.820246	0.574117
86	1-oleoyl-GPC (18:1)	1656	TRUE	-0.199579	-0.0186573	0.0862437	-0.012647	0.0870907	0.0729167	0.0687694	0.0880597	0.0265187	0.0143075	-0.0240115	0.34708	0.798709	0.149364	0.922879	0.533879	0.339332	0.366585	0.285826	0.743406	1.4155e-06	2.25905e-05	0.947911	0.574117
309	dihomo-linoleate (20:2n6)	1656	TRUE	-1.41322	-0.114382	-0.0845644	0.262598	-0.113416	-0.240948	-0.242967	-0.0967214	-8.9315e-05	0.0269662	0.00728494	1.15515e-11	0.111067	0.149637	0.0404975	0.408988	0.00129139	0.00114948	0.232171	0.999103	1.96649e-20	0.190087	0.603062	0.574117
405	laurylcarnitine (C12)	1656	TRUE	-1.72028	0.021658	-0.0828947	0.479231	-0.242248	-0.246252	-0.298129	-0.0720709	-0.0475627	0.0325053	0.00808162	4.21089e-17	0.758789	0.150587	0.000141738	0.072668	0.000816483	4.9043e-05	0.364882	0.542523	6.20933e-30	0.139022	0.929379	0.57483
47	1-dihomo-linoleoyl-GPC (20:2)*	1656	TRUE	-0.914461	-0.147093	0.0842977	-0.3285	0.141624	0.0915101	0.153699	0.136234	0.057747	0.0206005	-0.0091399	1.34829e-05	0.0422549	0.154565	0.0110805	0.306816	0.225767	0.041501	0.0953101	0.471475	2.30373e-12	0.103217	0.460692	0.582797
393	inosine	1656	TRUE	0.333931	0.0359214	0.0858834	-0.202296	0.124103	0.0366288	0.0908739	-0.14535	-0.0107745	-0.00507324	-0.00392596	0.119215	0.626783	0.15505	0.125133	0.379979	0.634537	0.237363	0.0810313	0.895207	0.0903375	0.492595	0.879367	0.582797
249	alpha-glutamylglycine	1656	TRUE	-0.508748	-0.0837344	-0.0860904	-0.066755	-0.0908271	-0.00185981	-0.0550299	0.0638478	0.0357914	0.00677657	0.00756647	0.0182577	0.259701	0.156395	0.61482	0.522884	0.980853	0.476776	0.446012	0.663504	0.0244817	0.188503	0.714252	0.582797
570	threonine	1656	TRUE	-0.155911	0.108846	-0.0853013	0.018408	-0.0929762	-0.160784	-0.142216	-0.189818	-0.151454	0.0072697	-0.00320954	0.46623	0.140001	0.1572	0.888839	0.51003	0.0366243	0.0640038	0.0224798	0.0636675	0.0150667	0.574204	0.608414	0.582797
382	homocitrulline	1656	TRUE	-1.71588	0.0753211	0.0827005	0.25958	0.129528	-0.12344	-0.0981235	-0.104909	-0.133174	0.0298966	0.00910928	1.5085e-16	0.293068	0.157968	0.0424345	0.344713	0.0985498	0.188285	0.194091	0.0931834	7.66613e-25	0.10063	0.722863	0.582797
432	N-(2-furoyl)glycine	1656	TRUE	-0.940313	0.145484	0.084582	0.188314	-0.141767	-0.215585	-0.21561	-0.269207	-0.305321	0.0189943	0.00530877	9.86109e-06	0.0472422	0.158288	0.150358	0.312304	0.00482198	0.00473565	0.00113136	0.000169584	1.67633e-10	0.349881	0.492897	0.582797
174	2-piperidinone	1656	TRUE	-0.342503	-0.017227	-0.0850865	-0.0180863	0.0150121	-0.0457553	0.0236399	-0.178631	-0.115657	0.00468715	0.00678967	0.109822	0.815503	0.158675	0.890881	0.915376	0.552422	0.758418	0.0319163	0.15715	0.117433	0.23507	0.947911	0.582797
652	X - 12844	1656	TRUE	-1.74677	0.00673858	-0.0830909	0.44866	0.0154581	-0.0136537	0.00175779	0.0136261	-0.0685181	0.0211496	0.0265831	7.08845e-17	0.925582	0.158936	0.000496276	0.910843	0.856024	0.981328	0.86699	0.391052	4.84051e-13	1.95893e-06	0.977311	0.582797
353	glutarylcarnitine (C5-DC)	1656	TRUE	-1.76247	0.154655	0.0828443	0.504741	0.169534	0.020998	0.0972068	-0.0134027	0.0536279	0.0200402	0.0250281	3.42236e-17	0.0318394	0.159649	8.74355e-05	0.21884	0.779949	0.195017	0.868987	0.50148	6.92926e-12	7.29267e-06	0.449535	0.582797
71	1-methylnicotinamide	1656	TRUE	0.445395	-0.0472444	-0.0845853	0.0846772	-0.146045	-0.0306227	0.060984	0.0871482	0.000996334	0.00176551	-0.0208653	0.0375555	0.522169	0.161079	0.520615	0.301179	0.690853	0.427466	0.295164	0.990275	0.555311	0.000262703	0.862539	0.585176
277	caproate (6:0)	1656	TRUE	-0.485617	0.0322561	0.0838276	0.0816704	-0.00454532	-0.228729	-0.201562	-0.0941622	-0.000363785	0.00375812	0.0150982	0.0232299	0.661837	0.164463	0.535142	0.974306	0.0029459	0.0086585	0.257554	0.996446	0.208862	0.00820946	0.890832	0.594595
30	10-undecenoate (11:1n1)	1656	TRUE	-1.30144	0.137983	-0.0815202	0.272697	-0.279116	-0.182154	-0.166347	-0.0787207	0.0142047	0.0222263	0.00996969	5.68433e-10	0.0565476	0.168258	0.0348247	0.0438316	0.0158132	0.0272405	0.334727	0.859294	3.6025e-14	0.0752637	0.492897	0.599427
150	2-hydroxy-3-methylvalerate	1656	TRUE	-0.847309	0.0615025	-0.0814777	0.821602	0.235872	-0.0284767	-0.0562367	-0.00558974	-0.0189286	-2.75187e-05	0.0331492	5.75501e-05	0.396927	0.169879	2.33506e-10	0.0895402	0.706897	0.456859	0.945569	0.813857	0.992542	3.73947e-09	0.778469	0.599427
201	3-methylglutarylcarnitine (2)	1656	TRUE	-1.77645	-0.0268866	0.0802155	-0.355334	0.19029	0.0384675	0.160114	0.10863	0.121323	0.0289059	0.00766206	1.08047e-17	0.706847	0.169952	0.00537667	0.164215	0.605954	0.0314503	0.177843	0.125369	2.03123e-23	0.166408	0.905535	0.599427
42	1-arachidonylglycerol (20:4)	1656	TRUE	-1.70355	-0.0727637	0.0816733	-0.00311646	0.11694	-0.057348	0.149334	0.0611088	0.0809553	0.0210673	0.0218536	7.51717e-16	0.317781	0.170222	0.980883	0.401441	0.450343	0.0489046	0.456886	0.315481	9.80392e-13	0.000107037	0.73129	0.599427
98	1-palmitoyl-2-docosahexaenoyl-GPE (16:0/22:6)*	1656	TRUE	-1.55287	0.160722	0.0806037	-0.386122	0.0183999	-0.0177946	0.0385923	-0.0161891	-0.0157097	0.0275372	0.00434562	1.00107e-13	0.0254633	0.170539	0.00264681	0.893661	0.812538	0.606325	0.841821	0.84365	3.70625e-21	0.435388	0.44522	0.599427
610	X - 11470	1656	TRUE	-0.586552	-0.0448663	-0.0820619	0.903702	-0.0279016	0.00421752	-0.0765235	-0.0559721	-0.0403749	0.00592602	0.012077	0.00577461	0.54016	0.170582	4.85356e-12	0.8422	0.955976	0.315586	0.497995	0.618604	0.0460074	0.0332546	0.864295	0.599427
581	tyrosine	1656	TRUE	-2.45716	-0.00165307	-0.0772796	0.43202	-0.0260193	-0.194036	-0.367396	-0.174504	-0.212513	0.029818	0.0443603	1.99603e-34	0.980946	0.172083	0.00047334	0.844259	0.00719876	3.42367e-07	0.0253788	0.0055586	2.3071e-26	1.28502e-16	0.997941	0.600423
376	hexanoylcarnitine (C6)	1656	TRUE	-2.38232	0.0240706	-0.0774161	0.431808	-0.228581	-0.212896	-0.242706	-0.112417	-0.0515889	0.0367584	0.0249911	2.66888e-32	0.728713	0.172462	0.00049315	0.0852059	0.00327236	0.000781644	0.150894	0.502017	5.42442e-39	3.32748e-06	0.915411	0.600423
310	dihomo-linolenate (20:3n3 or n6)	1656	TRUE	-1.29058	-0.152948	0.080825	-0.0160453	0.217551	-0.0571805	-0.075666	0.0249894	-0.0308526	0.0128102	0.0258416	9.47647e-10	0.0354175	0.173963	0.901645	0.117905	0.45089	0.317503	0.760547	0.701566	1.39331e-05	4.4556e-06	0.450655	0.601643
567	theobromine	1656	TRUE	-0.398744	0.162722	-0.0811709	-0.423011	-0.0657484	-0.0970421	0.01439	-0.0364489	0.0406356	-0.00405099	0.0248721	0.0600766	0.0260063	0.174412	0.0011918	0.638315	0.203113	0.850019	0.658371	0.615638	0.171715	1.11624e-05	0.44522	0.601643
543	sphingomyelin (d18:2/16:0, d18:1/16:1)*	1656	TRUE	-3.68454	-0.0280672	0.0725226	-0.409402	-0.107265	0.0215382	-0.00472831	-0.0933293	-0.0957568	0.0415973	0.0620267	2.54959e-83	0.669097	0.176805	0.000480834	0.393337	0.753204	0.944863	0.207599	0.1879	5.25433e-55	3.30511e-34	0.890832	0.60711
335	gamma-glutamylglutamate	1656	TRUE	-1.69961	0.096229	0.0791284	0.527822	-0.0851395	0.0349626	-0.0771541	-0.00950242	0.172562	0.0221674	0.0194667	3.90424e-16	0.181108	0.178625	3.99087e-05	0.536345	0.641343	0.303034	0.906778	0.0303264	3.0194e-14	0.000477427	0.667613	0.610574
542	sphingomyelin (d18:2/14:0, d18:1/14:1)*	1656	TRUE	-4.04903	-0.0653565	0.0690236	-0.685701	-0.173024	0.0517998	0.0233767	-0.080007	-0.0100696	0.0428421	0.07334	3.64538e-107	0.303126	0.183477	1.44499e-09	0.154253	0.433959	0.723497	0.263647	0.886068	3.19233e-62	2.44639e-50	0.722863	0.622014
351	glutamine	1656	TRUE	-0.292609	0.0552205	-0.0792252	0.191959	-0.0511533	-0.125662	-0.0626058	-0.0123397	-0.230234	0.0166965	-0.0185221	0.16636	0.448595	0.183626	0.140166	0.713744	0.0983006	0.409254	0.880644	0.00432797	1.6016e-08	0.00103176	0.814839	0.622014
320	eicosapentaenoate (EPA; 20:5n3)	1656	TRUE	-1.99603	0.0329877	0.0759641	0.132396	0.0227405	-0.0498516	-0.00148418	-0.0411629	0.0204243	0.0383083	0.000807659	1.28296e-22	0.638886	0.186285	0.291555	0.865756	0.4966	0.98382	0.6036	0.793025	3.57383e-41	0.882072	0.882583	0.62749
611	X - 11478	1656	TRUE	0.131016	0.012516	-0.0791803	-0.0688711	0.142799	-0.118521	-0.0665353	-0.0862812	0.0237946	-0.0133358	0.0244717	0.538948	0.864785	0.187639	0.599754	0.309952	0.122124	0.384558	0.297901	0.770007	7.65758e-06	1.71627e-05	0.956995	0.62749
514	propionylcarnitine (C3)	1656	TRUE	-2.6571	0.121252	0.0745335	0.719618	0.0484702	-0.0546951	-0.0852546	-0.0789076	-0.0876759	0.0284237	0.047093	5.56618e-40	0.0797521	0.187746	5.76402e-09	0.714345	0.448628	0.236674	0.311972	0.252555	4.10362e-24	1.54387e-18	0.52551	0.62749
631	X - 12127	1656	TRUE	-0.921944	0.059503	-0.0794062	0.315709	0.110511	-0.0120792	-0.00676466	-0.0051127	0.00911442	0.00536981	0.0254988	1.76697e-05	0.421536	0.189563	0.0169292	0.435326	0.875699	0.930059	0.951168	0.911469	0.0736475	8.69945e-06	0.792487	0.630759
431	myristoylcarnitine (C14)	1656	TRUE	-2.09857	0.0692224	-0.0745909	0.475166	-0.228622	-0.125673	-0.203849	-0.0453197	0.00706287	0.0351747	0.0147653	5.13773e-25	0.322857	0.192608	0.000144482	0.087951	0.0853124	0.00516742	0.566015	0.927418	3.01375e-35	0.00647501	0.73129	0.63127
508	pregnenediol disulfate (C21H34O8S2)*	1656	TRUE	1.07758	0.0682198	-0.0767241	0.716362	-0.19084	-0.0311116	-0.0194924	0.00974951	-0.0612619	-0.0230166	0.00462636	2.65543e-07	0.344528	0.193522	2.71743e-08	0.167006	0.679407	0.795304	0.90465	0.443326	3.69307e-15	0.407855	0.746643	0.63127
331	gamma-CEHC	1656	TRUE	0.152058	0.0366407	0.0781506	-0.0962074	0.106565	0.0407485	0.0883924	-0.0347637	0.0276428	-0.0122959	0.0167041	0.476927	0.619023	0.194589	0.464683	0.449802	0.596019	0.249236	0.675705	0.734778	3.87093e-05	0.00342409	0.875397	0.63127
211	androstenediol (3beta,17beta) monosulfate (1)	1656	TRUE	0.771991	0.14618	-0.073957	0.582903	-0.0979082	-0.031496	-0.0215412	-0.00737522	-0.0628137	-0.0339271	0.038147	0.000138543	0.0363058	0.195173	2.93931e-06	0.463701	0.66543	0.766982	0.925379	0.416561	4.3923e-33	1.74081e-12	0.450655	0.63127
547	sphingosine 1-phosphate	1656	TRUE	-0.343935	0.00702533	-0.0779736	0.26582	-0.224435	-0.117491	-0.183394	0.0799288	-0.0179427	0.00393604	0.00837559	0.109017	0.924335	0.197311	0.0441688	0.112829	0.127829	0.0172441	0.337979	0.826604	0.189437	0.143751	0.977311	0.63127
169	2-oleoyl-GPE (18:1)*	1656	TRUE	0.0131353	0.132151	0.0776532	0.0684036	0.082069	-0.0846042	-0.114333	-0.0653636	-0.146975	0.00158799	-0.00207899	0.951297	0.0746172	0.200096	0.6053	0.56286	0.273861	0.138453	0.434256	0.0733499	0.597278	0.717253	0.523809	0.63127
533	S-methylcysteine	1656	TRUE	-0.0958791	0.109985	0.0764022	0.1449	-0.0924243	0.0311819	0.03421	-0.0260634	-0.0162317	0.0156926	-0.0297075	0.650987	0.13217	0.200835	0.266644	0.508493	0.682381	0.652836	0.751718	0.84096	1.17286e-07	1.51487e-07	0.608414	0.63127
221	4-methylcatechol sulfate	1656	TRUE	-0.57617	0.148809	0.077227	0.016466	-0.194092	-0.0168663	0.0716072	0.0563723	-0.0157803	0.0128985	-0.00513971	0.00719346	0.0440125	0.201134	0.900682	0.169828	0.826778	0.351913	0.498706	0.847059	1.66949e-05	0.369113	0.472821	0.63127
461	N-delta-acetylornithine	1656	TRUE	-0.841294	0.067095	0.0757757	0.381929	-0.0214162	-0.106791	-0.0395346	-0.025745	-0.0932388	0.0222703	-0.0110527	6.75095e-05	0.356515	0.202805	0.00328985	0.877767	0.159457	0.601773	0.753733	0.247219	4.44229e-14	0.049866	0.753088	0.63127
671	X - 15666	1656	TRUE	-0.420709	0.166507	0.0767359	0.111221	0.0203424	0.0118458	-0.0905468	-0.0755798	0.0893865	0.0049963	0.00547224	0.0498368	0.024314	0.204288	0.399531	0.885667	0.877922	0.23944	0.364677	0.274897	0.0956001	0.339241	0.44522	0.63127
255	anthranilate	1656	TRUE	-0.747776	0.0721685	0.0767661	0.103438	0.010033	0.121687	0.00563884	0.0605971	0.222417	0.00620193	0.0123486	0.000496296	0.329474	0.204553	0.433778	0.943519	0.114943	0.941656	0.467791	0.00664436	0.038763	0.0312062	0.73533	0.63127
392	indolepropionate	1656	TRUE	0.579791	-0.115494	0.0764367	-0.0605877	0.0727178	-0.0191811	-0.0331122	0.0673737	-0.0466641	0.000942321	-0.0243582	0.00677139	0.117593	0.205241	0.645688	0.606603	0.803231	0.66649	0.418213	0.56798	0.752846	2.03005e-05	0.608414	0.63127
525	retinol (Vitamin A)	1656	TRUE	-0.960421	0.0794103	0.0759415	0.359168	0.0198841	0.0724059	0.0200834	0.0477199	-0.0874893	0.0199593	-0.00485473	6.37051e-06	0.278915	0.205355	0.00609606	0.887328	0.343911	0.792525	0.563961	0.281339	1.92729e-11	0.392731	0.714252	0.63127
314	docosadienoate (22:2n6)	1656	TRUE	-1.20052	-0.0298725	-0.0744562	0.409919	-0.0687648	-0.204863	-0.173987	-0.118825	-0.0620284	0.0281924	-0.00474855	8.86013e-09	0.678003	0.205625	0.00141955	0.617452	0.00633917	0.0201903	0.143064	0.436231	4.31941e-22	0.394129	0.894755	0.63127
448	N-acetylglycine	1656	TRUE	0.903653	0.0663262	-0.0730855	-0.238017	-0.289884	0.0965702	0.00668462	0.0214882	0.0733237	0.0139348	-0.0642051	1.0352e-05	0.34772	0.205682	0.0591422	0.0319724	0.189953	0.927569	0.78734	0.348506	1.14313e-06	8.28026e-32	0.749242	0.63127
241	7-hydroxycholesterol (alpha or beta)	1656	TRUE	-0.647127	0.0549471	0.0762265	0.0688622	0.0351179	0.033492	-0.0770353	-0.234565	0.0962467	0.00677137	0.0118863	0.00249504	0.456317	0.206254	0.601099	0.803511	0.663347	0.315779	0.00480448	0.238644	0.0235796	0.0374672	0.818975	0.63127
217	4-hydroxyphenylacetate	1656	TRUE	-1.20869	0.168754	0.0752552	0.263778	0.139451	0.00285864	-0.120281	-0.0542985	0.0653763	0.0124648	0.0212386	1.15569e-08	0.0208134	0.207431	0.0430453	0.318206	0.970058	0.113551	0.509593	0.418712	2.55023e-05	0.000172689	0.44522	0.63127
259	arachidonate (20:4n6)	1656	TRUE	-0.608497	-0.046978	0.0761652	0.038588	0.220319	-0.0110564	-0.0359141	-0.0148889	0.0302221	0.007896	0.00730228	0.00454827	0.525079	0.207583	0.77002	0.119324	0.885978	0.640722	0.858244	0.711952	0.00843065	0.202127	0.862539	0.63127
83	1-oleoyl-2-linoleoyl-GPC (18:1/18:2)*	1656	TRUE	1.20814	-0.0161708	0.0748791	-0.0377175	-0.0777574	0.027703	0.0613997	0.0286321	-0.0855002	-0.00152343	-0.0452626	1.06214e-08	0.824203	0.20836	0.771689	0.576694	0.715231	0.417835	0.727255	0.288818	0.605782	9.8878e-16	0.947911	0.63127
24	1,3,7-trimethylurate	1656	TRUE	-1.56859	0.0979607	-0.0739184	-0.125318	0.0675993	-0.28415	-0.204918	-0.257008	-0.18075	0.0154777	0.0382855	5.40065e-14	0.172928	0.208476	0.328878	0.623089	0.000150745	0.00617414	0.00152121	0.0231496	1.09447e-07	6.10308e-12	0.646974	0.63127
361	glycochenodeoxycholate	1656	TRUE	0.428235	0.0324881	0.0760632	0.121373	0.216856	-0.0871822	-0.0825471	-0.134205	-0.155497	-0.00523832	-0.00382263	0.0467498	0.661612	0.210086	0.359808	0.126817	0.260159	0.285422	0.108876	0.0585062	0.0817894	0.506087	0.890832	0.63127
275	caffeine	1656	TRUE	-1.17922	0.126737	-0.0743732	-0.182059	0.0479205	-0.253017	-0.1408	-0.211662	-0.152388	0.0113057	0.0298954	2.29874e-08	0.0814447	0.211098	0.161008	0.730631	0.000853825	0.0629814	0.00987066	0.0584926	0.000126553	1.11657e-07	0.527987	0.63127
496	phenylalanylserine	1656	TRUE	-0.594972	0.0412096	0.0750611	0.302772	0.0425338	0.0356603	0.113628	-0.232289	-0.0440921	0.00734275	0.00755095	0.00525638	0.574916	0.211526	0.0210247	0.76227	0.641749	0.137447	0.00505963	0.587883	0.0137259	0.184567	0.871549	0.63127
264	azelate (nonanedioate)	1656	TRUE	-0.712787	0.00668549	0.0750116	0.00362745	-0.115055	-0.280478	-0.271713	-0.082513	0.0197638	0.010032	0.0127979	0.000823017	0.927475	0.211635	0.977935	0.413004	0.000251344	0.000380334	0.31917	0.808001	0.000756256	0.0244661	0.977311	0.63127
97	1-palmitoyl-2-docosahexaenoyl-GPC (16:0/22:6)	1656	TRUE	-1.56667	0.0554434	0.0719836	-0.212747	-0.122509	-0.0376908	-0.0443994	-0.129906	-0.129323	0.0368032	-0.0105242	2.29172e-14	0.43321	0.213321	0.0921584	0.365475	0.609518	0.546616	0.103463	0.0987637	1.12184e-37	0.05476	0.802398	0.63127
390	indoleacetate	1656	TRUE	-0.437897	0.0544132	0.0750968	0.314708	-0.00305093	0.10082	-0.0778067	0.00615097	-0.0888757	0.0119291	-0.00786358	0.0408702	0.46101	0.213369	0.016953	0.982766	0.190374	0.311287	0.941094	0.276861	6.73044e-05	0.168964	0.820246	0.63127
539	sphingomyelin (d18:1/20:1, d18:2/20:0)*	1656	TRUE	-1.93504	-0.0849886	0.0723232	-0.517356	0.25291	-0.00970524	-0.0165741	-0.0703012	-0.10788	0.0248424	0.0275758	7.68627e-21	0.232795	0.214284	4.74924e-05	0.0635145	0.896071	0.823139	0.381464	0.171375	7.89099e-18	5.77148e-07	0.703059	0.63127
663	X - 14838	1656	TRUE	-1.14531	-0.0127746	-0.0738964	0.254613	0.193587	0.166034	0.0909666	-0.0794988	0.164778	0.0106932	0.0204484	6.28673e-08	0.861016	0.215457	0.0506731	0.165582	0.0291431	0.231095	0.333963	0.0413996	0.000301234	0.000296273	0.956401	0.63127
695	X - 18899	1656	TRUE	0.0425441	-0.0414603	0.0745879	-0.0528182	-0.228779	-0.118033	-0.0499352	-0.0481416	-0.0908518	-0.00861473	0.0182031	0.842397	0.57401	0.216115	0.688374	0.105001	0.124961	0.515465	0.562712	0.265933	0.00396932	0.00143873	0.871549	0.63127
418	mannose	1656	TRUE	-2.06235	-0.0403334	-0.0716968	0.468592	-0.0844008	-0.0896955	-0.114662	-0.0789004	0.013567	0.0146598	0.0540463	1.45817e-23	0.570276	0.217154	0.000221388	0.534759	0.226201	0.121126	0.324789	0.863094	3.61659e-07	9.13647e-23	0.871549	0.63127
386	hypotaurine	1656	TRUE	1.52579	-0.0108038	-0.073402	0.218201	-0.132198	0.0208846	-0.0956063	0.0797017	-0.0825436	-0.00761536	-0.043202	4.90263e-13	0.88196	0.217257	0.0930644	0.342366	0.783183	0.206896	0.33138	0.305587	0.0098475	1.76898e-14	0.961209	0.63127
505	piperine	1656	TRUE	-0.0590325	0.00256734	-0.074554	-0.166015	0.067385	-0.209186	-0.149182	-0.100274	-0.249548	-0.000903146	0.0105267	0.783343	0.972324	0.217863	0.208975	0.63416	0.00672696	0.0528137	0.229523	0.00232299	0.763426	0.06625	0.997941	0.63127
738	X - 23974	1656	TRUE	-0.306589	-0.0321591	0.0747973	-0.300373	0.0578785	-0.0920119	-0.0281777	-0.020516	0.0467431	0.00880077	-0.00477537	0.154928	0.665126	0.218208	0.0235678	0.683928	0.23512	0.715638	0.806564	0.569917	0.00348647	0.406603	0.890832	0.63127
213	4-ethylphenylsulfate	1656	TRUE	0.344991	0.112434	0.0742309	-0.0882515	-0.0830885	0.0661612	0.036463	0.0875759	0.01335	0.00357466	-0.0232494	0.10737	0.127906	0.218946	0.503362	0.556566	0.390425	0.635323	0.29302	0.870322	0.232606	4.80956e-05	0.608414	0.63127
315	docosahexaenoate (DHA; 22:6n3)	1656	TRUE	-1.62712	-0.0314408	0.0706061	0.0454103	0.0111544	-0.125102	-0.118279	-0.0656426	-0.0147903	0.0388527	-0.0121317	1.44841e-15	0.654562	0.219098	0.717423	0.933887	0.0878652	0.105919	0.407467	0.849243	2.46187e-42	0.0258037	0.88921	0.63127
731	X - 23587	1656	TRUE	-0.463003	0.0992751	-0.073849	0.171281	0.268251	-0.142968	-0.126851	-0.164655	-0.111592	0.00615365	0.00974264	0.0306241	0.178667	0.221108	0.193796	0.0575533	0.0633465	0.0988138	0.0479357	0.172182	0.0397984	0.0883605	0.66186	0.633684
0	1-(1-enyl-oleoyl)-GPC (P-18:1)*	1656	TRUE	-0.173502	0.0100364	0.0737608	-0.188513	-0.0613534	-0.000375118	-0.0264995	0.00853235	0.0728784	0.0104871	-0.015181	0.41863	0.892029	0.222427	0.153352	0.664555	0.996119	0.730658	0.918498	0.373398	0.000469177	0.00802673	0.965662	0.633684
488	p-cresol sulfate	1656	TRUE	-0.214195	0.152084	0.0732619	-0.201648	0.0578751	0.107481	0.108758	0.167558	0.0253763	0.0117046	-0.01956	0.314883	0.0384228	0.222548	0.124226	0.68054	0.160709	0.154994	0.043112	0.755062	8.51568e-05	0.000586057	0.459696	0.633684
413	lysine	1656	TRUE	-1.96679	0.103649	-0.0705844	0.349943	0.0946779	-0.11584	-0.235487	-0.0381492	-0.205759	0.027244	0.0266871	1.14616e-21	0.143713	0.223306	0.00570145	0.48521	0.117219	0.00141894	0.633225	0.00876143	2.60218e-21	1.17002e-06	0.612004	0.633684
534	sphingomyelin (d18:1/14:0, d16:1/16:0)*	1656	TRUE	-2.8139	-0.079816	0.0670069	-0.236939	-0.200736	-0.0141741	0.0087206	-0.0655499	-0.114871	0.0417731	0.0281422	2.59105e-46	0.239663	0.227308	0.0506111	0.122248	0.841338	0.90179	0.391835	0.126447	5.07751e-52	8.65349e-08	0.706338	0.642614
546	sphingosine	1656	TRUE	-1.28447	-0.0333606	-0.0718456	0.173328	-0.2407	-0.0917346	-0.152378	0.167958	-0.0356747	0.0116511	0.0290901	1.26601e-09	0.647305	0.228173	0.183129	0.0845163	0.227788	0.0447208	0.0411008	0.65861	8.13232e-05	2.59084e-07	0.885043	0.642643
657	X - 13737	1656	TRUE	-1.34173	0.249011	0.0721467	0.173104	0.216999	0.0334816	0.0943528	0.151848	0.0467739	0.0111299	0.0253441	3.04529e-10	0.000698267	0.229604	0.186885	0.122599	0.662101	0.217234	0.0667657	0.565218	0.000186247	8.37936e-06	0.105019	0.644261
417	mannitol/sorbitol	1656	TRUE	-1.13636	0.0749055	-0.0719333	0.191835	0.195268	-0.0652024	-0.0445578	0.026669	0.000191959	0.0132792	0.0184515	9.73244e-08	0.307905	0.231076	0.143638	0.164813	0.394837	0.560164	0.747522	0.998117	8.28242e-06	0.00118297	0.722863	0.645173
388	imidazole lactate	1656	TRUE	-0.258413	0.0252827	-0.0724369	0.189027	-0.18954	-0.0271516	-0.00922236	-0.0424183	-0.0727848	0.00641453	-0.00129213	0.229856	0.733232	0.232349	0.153562	0.181778	0.725662	0.904943	0.612108	0.375557	0.0329636	0.822052	0.917178	0.645173
556	succinylcarnitine (C4-DC)	1656	TRUE	-2.88428	0.0782052	0.0670358	0.583886	0.223142	-0.0267634	-0.0323172	-0.0873948	-0.0403095	0.0317432	0.0483229	5.25912e-47	0.257344	0.235032	2.18026e-06	0.0912269	0.71018	0.652998	0.261681	0.59802	8.49553e-30	1.6149e-19	0.714252	0.645173
480	palmitate (16:0)	1656	TRUE	-1.64644	-0.0645165	-0.068587	0.267616	-0.295626	-0.301469	-0.38619	-0.105951	-0.0781992	0.0279896	0.0166939	1.10068e-15	0.362187	0.236105	0.0342844	0.0291111	4.46662e-05	1.61297e-07	0.184534	0.318558	1.86451e-22	0.00233249	0.756569	0.645173
246	adrenate (22:4n6)	1656	TRUE	-1.2968	-0.0818799	-0.0702097	0.222563	0.0302449	-0.219847	-0.263072	-0.0864176	0.00159375	0.0157593	0.0246557	7.02428e-10	0.258716	0.236221	0.085569	0.827413	0.00364653	0.000491092	0.290504	0.98416	8.28319e-08	1.12744e-05	0.714252	0.645173
91	1-palmitoleoyl-GPC (16:1)*	1656	TRUE	-1.98103	0.0625444	0.0693614	-0.298003	-0.0768216	0.0835243	0.0195429	0.0264816	0.0576932	0.0235374	0.0281534	1.62835e-21	0.382887	0.236588	0.0198944	0.575409	0.263932	0.793402	0.743203	0.467283	5.57248e-16	3.94783e-07	0.773352	0.645173
222	4-vinylphenol sulfate	1656	TRUE	0.605561	0.0653717	-0.0713435	0.381029	0.0983097	0.0648505	-0.0316318	-0.0503046	-0.0912853	-0.00203188	-0.0192157	0.00475907	0.37663	0.237952	0.00390264	0.487158	0.400439	0.681127	0.546315	0.26487	0.497963	0.000792162	0.771733	0.645173
522	pyruvate	1656	TRUE	0.0413014	-0.000860417	-0.0713061	0.210225	0.0120376	0.090347	0.0398957	-0.00714143	-0.0904689	-0.00393604	0.00619923	0.847468	0.990724	0.238641	0.111667	0.932262	0.241875	0.604604	0.931813	0.269621	0.18967	0.27947	0.997941	0.645173
349	glucuronate	1656	TRUE	-1.47309	0.0745558	0.0702427	0.213451	-0.0441459	0.0751397	-0.0523608	0.0402703	0.0729018	0.017154	0.0210447	3.70448e-12	0.307621	0.239747	0.101892	0.752233	0.324263	0.491303	0.625091	0.367631	7.08552e-09	0.000200607	0.722863	0.645173
204	3-phenylpropionate (hydrocinnamate)	1656	TRUE	0.905538	0.0578282	0.070009	-0.161462	-0.360896	-0.0198355	-0.0137827	0.0619507	0.0408551	0.00338854	-0.0428605	1.89372e-05	0.428108	0.240656	0.215316	0.00975326	0.794416	0.856041	0.451584	0.613141	0.25216	3.36751e-14	0.79703	0.645173
218	4-hydroxyphenylpyruvate	1656	TRUE	-0.809052	-0.00432197	-0.070398	0.0538788	0.0413098	-0.0661472	-0.0739686	-0.111533	-0.145177	0.0111554	0.0129456	0.000153417	0.953216	0.242486	0.682106	0.769483	0.389334	0.334807	0.179419	0.0751165	0.000188127	0.0232697	0.99008	0.645173
558	tartarate	1656	TRUE	-0.374765	-0.0888614	-0.0701176	-0.293943	-0.24346	-0.0903559	-0.172622	-0.0958747	-0.22521	0.0166816	-0.0122254	0.0783714	0.225938	0.242562	0.024887	0.0829652	0.237847	0.0238554	0.246664	0.00558013	2.07217e-08	0.0314785	0.6992	0.645173
627	X - 12026	1656	TRUE	-2.51476	0.0328	-0.0673021	-0.0171009	0.124525	-0.0406194	0.0383437	-0.0391317	0.0271975	0.0293137	0.0398862	1.177e-34	0.642188	0.243589	0.892086	0.356604	0.581198	0.601851	0.623037	0.727885	1.30307e-24	2.97869e-13	0.882862	0.645173
151	2-hydroxyadipate	1656	TRUE	-1.12665	0.065008	0.0696293	0.100915	-0.138372	0.0857995	-0.13448	-0.0613036	-0.152548	0.0103601	0.0243324	1.05757e-07	0.373462	0.243647	0.439095	0.322173	0.260112	0.0769794	0.456736	0.0592806	0.00046899	1.6986e-05	0.769435	0.645173
401	kynurenate	1656	TRUE	-2.12651	-0.0443457	-0.067433	0.502534	-0.101576	-0.0878217	-0.139914	-0.196263	-0.151344	0.0183518	0.0511454	4.51379e-25	0.531475	0.244508	7.15089e-05	0.45383	0.234818	0.0579064	0.0140579	0.0537756	1.69986e-10	1.1811e-20	0.863358	0.645173
345	gamma-glutamylvaline	1656	TRUE	-2.0247	0.103161	0.0679895	0.498812	0.0115516	-0.00436762	-0.120496	-0.116818	0.0597374	0.0234792	0.03188	1.65734e-22	0.149059	0.244805	9.34205e-05	0.932712	0.953299	0.105484	0.147385	0.450516	5.55919e-16	8.55278e-09	0.622734	0.645173
406	leucine	1656	TRUE	-2.39121	0.0269843	-0.0660056	0.628416	-0.119643	-0.210749	-0.306909	-0.1395	-0.210474	0.0299306	0.0405744	1.87761e-32	0.697763	0.245315	4.0905e-07	0.368218	0.00364142	2.20975e-05	0.0750404	0.00622888	2.33852e-26	4.72241e-14	0.905535	0.645173
271	bilirubin (E,E)*	1656	TRUE	0.0439253	-0.0321387	-0.0697059	0.163728	-0.225563	0.0902578	0.0548288	0.192579	0.0236414	0.00503362	-0.0135791	0.836559	0.661448	0.245371	0.211532	0.108236	0.23839	0.472999	0.0199736	0.771116	0.0907527	0.0168954	0.890832	0.645173
456	N-acetylserine	1656	TRUE	-0.638588	0.0432001	-0.0698912	0.42281	-0.0144853	-0.0236502	0.00455899	-0.0198708	-0.0627457	0.00568185	0.0143	0.00289734	0.558839	0.247394	0.0013551	0.918413	0.758993	0.952748	0.811547	0.443216	0.0579508	0.0124746	0.868604	0.648223
669	X - 15497	1656	TRUE	-2.05755	0.0602735	0.0669573	0.309768	0.113929	-0.153891	-0.158929	-0.254201	-0.204938	0.0164462	0.052205	2.4609e-23	0.397641	0.250458	0.0149138	0.403422	0.0384161	0.0321687	0.00156005	0.00939659	1.25773e-08	3.10255e-21	0.778469	0.653973
724	X - 22776	1656	TRUE	-0.708823	0.0261006	0.0689484	-0.0404518	0.154896	-0.0823807	-0.0791041	-0.0480307	0.251384	0.00354189	0.0199176	0.000922011	0.723366	0.252782	0.758676	0.272305	0.284148	0.302803	0.563538	0.00207854	0.236191	0.000487407	0.915411	0.657757
711	X - 21628	1656	TRUE	-1.10546	-0.0272153	-0.0681105	-0.0872587	0.143417	0.0759478	0.110215	-0.166794	0.0549382	0.0137152	0.0153544	2.12758e-07	0.710978	0.256711	0.505838	0.307518	0.321526	0.149473	0.0440371	0.499351	4.12181e-06	0.00695019	0.907734	0.663697
385	(R)-3-hydroxybutyrylcarnitine	1656	TRUE	-2.0822	0.0711583	-0.066297	0.367575	-0.060357	-0.037163	0.0728531	-0.121433	0.131278	0.0251475	0.0303468	1.0548e-23	0.319692	0.25683	0.00399396	0.659147	0.618326	0.32778	0.132115	0.0973355	4.2251e-18	4.26819e-08	0.73129	0.663697
379	histidine	1656	TRUE	-1.01618	0.0646878	-0.0675156	0.115021	-0.335832	-0.0482716	-0.0937053	0.0150067	-0.231238	0.0165354	0.00986283	1.65103e-06	0.376144	0.258577	0.378169	0.016344	0.526642	0.218158	0.855535	0.00427541	2.41811e-08	0.0814619	0.771733	0.665924
292	citrulline	1656	TRUE	-1.88455	0.00901561	-0.0629914	0.243054	-0.112572	-0.194844	-0.16103	-0.0462497	-0.116756	0.0422615	-0.00652453	6.06578e-21	0.89632	0.26546	0.0491352	0.395144	0.0069354	0.0253717	0.553327	0.127493	2.77951e-51	0.22336	0.965662	0.680033
557	sulfate*	1656	TRUE	-1.63614	0.0346175	-0.0657218	0.237692	0.131737	0.0398949	-0.0530044	-0.103059	0.0351554	0.024208	0.0160396	6.95558e-15	0.632724	0.267137	0.0661178	0.341906	0.597502	0.482145	0.207094	0.661175	1.69921e-16	0.00424981	0.882583	0.680033
197	3-methyl-2-oxovalerate	1656	TRUE	-0.181126	0.0318577	-0.0668268	0.302503	0.0504708	-0.0658108	-0.0627972	-0.151764	-0.297683	0.00512311	0.00106171	0.397364	0.665831	0.267854	0.0216433	0.720672	0.392384	0.413518	0.0680968	0.000267946	0.0867575	0.852572	0.890832	0.680033
718	X - 21849	1656	TRUE	-1.22438	0.148007	-0.0659671	0.136101	0.200599	-0.154853	-0.0567762	-0.0572442	0.0123603	0.00527374	0.0390492	6.84538e-09	0.0421273	0.267933	0.295306	0.15003	0.0415088	0.453962	0.48581	0.878185	0.074133	4.42355e-12	0.460692	0.680033
404	laurate (12:0)	1656	TRUE	-0.98405	-0.114764	-0.065231	-0.0276732	-0.267734	-0.329176	-0.271315	-0.235829	-0.226363	0.0230941	0.00247888	2.57085e-06	0.111589	0.268684	0.829877	0.0524042	1.21345e-05	0.000302553	0.00374081	0.00459426	2.88049e-15	0.657233	0.603062	0.680033
500	phosphate	1656	TRUE	0.261989	0.018799	-0.0663286	0.00667334	0.368547	0.0039474	-0.281984	-0.0152413	0.0274251	-0.00455549	0.00151472	0.219	0.798035	0.269481	0.959429	0.00875042	0.958918	0.000227001	0.854039	0.736017	0.12621	0.790073	0.947911	0.680033
263	aspartylphenylalanine	1656	TRUE	-0.782622	-0.0431106	-0.0663206	0.0898091	-0.0904128	0.000645392	-0.0795121	0.0782256	0.067719	0.0055357	0.0200226	0.000258351	0.559263	0.271898	0.495714	0.522178	0.993313	0.300901	0.34744	0.407461	0.0644382	0.000462258	0.868604	0.681976
212	androstenediol (3beta,17beta) monosulfate (2)	1656	TRUE	0.481954	0.170731	-0.0645519	-0.14422	-0.0732309	0.115112	0.0947314	0.200644	0.181746	-0.0238957	0.0244532	0.0210712	0.0177525	0.272947	0.262074	0.595136	0.125427	0.206403	0.0134905	0.0226595	2.77153e-16	1.16432e-05	0.44522	0.681976
684	X - 17146	1656	TRUE	-0.601849	-0.0671861	-0.065102	-0.278638	-0.384573	-0.385037	-0.0612324	-0.371561	-0.316731	0.00902549	0.0159105	0.00428944	0.354965	0.272972	0.031685	0.00565792	3.73319e-07	0.418073	5.72828e-06	8.21282e-05	0.00218091	0.0046793	0.753088	0.681976
585	urea	1656	TRUE	-2.42205	-0.048735	-0.0623491	0.453631	-0.137644	0.0757903	-0.0861194	-0.0437472	-0.0787627	0.0365728	0.0226378	5.20023e-33	0.484752	0.274286	0.000270489	0.30243	0.297568	0.235654	0.578115	0.30785	3.03368e-38	2.78488e-05	0.83731	0.68299
544	sphingomyelin (d18:2/23:0, d18:1/23:1, d17:1/24:1)*	1656	TRUE	-2.33139	-0.131438	0.0608702	-0.400636	-0.177817	0.0485258	-0.0270777	-0.074988	-0.135053	0.0427301	0.0077163	7.8165e-32	0.0547968	0.276688	0.00104448	0.174537	0.496673	0.703923	0.331259	0.0747361	1.71102e-53	0.145468	0.492897	0.684161
676	X - 16570	1656	TRUE	-0.530094	0.0776886	-0.0656325	-0.195206	0.116439	-0.0115677	0.00177384	0.0382069	0.151062	0.000509428	0.0189003	0.0133501	0.292774	0.277013	0.138766	0.409921	0.880625	0.981592	0.64638	0.0646837	0.864908	0.000950815	0.722863	0.684161
69	1-methylhistidine	1656	TRUE	-1.85511	0.0236269	-0.0637949	0.355903	0.128688	0.0163876	-0.133127	-0.0329247	0.0128677	0.0249596	0.0236049	5.95084e-19	0.742458	0.277848	0.00557098	0.349621	0.82704	0.0753279	0.684706	0.871605	1.12118e-17	2.24717e-05	0.918304	0.684161
283	cholate	1656	TRUE	-0.80003	0.101955	0.0652075	0.380352	0.107961	0.0927412	-0.0322051	-0.0694408	-0.0882319	0.00919792	0.0116367	0.000182999	0.166571	0.279217	0.00385212	0.443979	0.227696	0.674695	0.403461	0.279648	0.00208653	0.0414948	0.641242	0.684161
288	cis-4-decenoylcarnitine (C10:1)	1656	TRUE	-1.96502	0.0384826	-0.0629247	0.409208	-0.137733	-0.177669	-0.194124	-0.0859741	-0.0332763	0.0305086	0.0197087	1.73416e-21	0.588581	0.279373	0.00127729	0.311684	0.0166633	0.00877091	0.283922	0.672739	3.8868e-26	0.000347924	0.873003	0.684161
290	citraconate/glutaconate	1656	TRUE	-0.739657	0.0919849	0.0650487	-0.0577134	-0.103298	-0.119544	-0.159017	-0.31629	-0.25005	0.0147274	0.0052089	0.000548872	0.212461	0.280858	0.661316	0.464342	0.120319	0.0384167	0.00014374	0.0022067	8.52291e-07	0.361966	0.697494	0.684161
312	dimethylarginine (SDMA + ADMA)	1656	TRUE	-2.2571	0.141467	-0.0613856	0.497719	-0.103333	-0.0901913	-0.125404	0.0296579	-0.092838	0.0374906	0.014775	5.82822e-29	0.042271	0.281125	6.29772e-05	0.43821	0.214512	0.0837697	0.705776	0.228747	3.33487e-40	0.00617029	0.460692	0.684161
10	1-(1-enyl-palmitoyl)-2-palmitoyl-GPC (P-16:0/16:0)*	1656	TRUE	-0.00808268	-0.0459989	0.0638596	-0.133967	-0.577322	0.0303234	-0.0586849	-0.0274037	-0.0295856	0.0123089	-0.0231665	0.969552	0.528538	0.284563	0.303986	3.56959e-05	0.690408	0.43992	0.73918	0.714309	3.19598e-05	4.16257e-05	0.863358	0.690296
697	X - 18913	1656	TRUE	-0.921879	0.0962334	0.0636564	0.276316	-0.131795	-0.200007	-0.227534	-0.149999	-0.151691	0.0158095	0.00929771	1.50407e-05	0.189929	0.28893	0.0350539	0.348171	0.00900874	0.00291144	0.0700294	0.0620483	1.09291e-07	0.102013	0.68348	0.698636
682	X - 17010	1656	TRUE	-0.785011	0.0333505	0.063158	-0.0058287	0.0344313	-0.0776512	-0.0750274	-0.0150983	0.303343	0.00634911	0.016598	0.00023058	0.649869	0.293063	0.964562	0.806521	0.310932	0.326628	0.8554	0.000192401	0.0330711	0.00353418	0.886936	0.701008
258	arachidate (20:0)	1656	TRUE	0.171035	0.0123427	-0.0624976	0.2869	-0.0931987	-0.253948	-0.283804	-0.169709	-0.0801984	0.0148286	-0.0297446	0.418057	0.865368	0.29372	0.0273115	0.503474	0.00082512	0.000180648	0.038718	0.319791	5.07855e-07	1.32392e-07	0.956995	0.701008
256	arabitol/xylitol	1656	TRUE	-2.04387	0.0726036	-0.0604099	0.649177	-0.106886	-0.0720594	-0.132546	-0.0652655	-0.103385	0.0339435	0.0141866	1.60646e-23	0.302982	0.294526	2.49755e-07	0.428081	0.327036	0.0708732	0.411601	0.185293	1.57455e-32	0.00935661	0.722863	0.701008
686	X - 17167	1656	TRUE	0.570321	0.0398088	0.0623973	-0.122144	0.287284	0.104048	0.106496	-0.240422	-0.00351963	-0.00971683	-0.00418565	0.00749309	0.588144	0.299203	0.352111	0.0411229	0.17481	0.164066	0.00373047	0.965511	0.00111519	0.462238	0.873003	0.701008
121	1-stearoyl-2-arachidonoyl-GPE (18:0/20:4)	1656	TRUE	-1.2808	0.155885	0.0621328	-0.301496	0.168188	0.0264344	0.0416954	0.0858477	-0.0311434	0.0103484	0.0270459	1.63174e-09	0.0332115	0.299215	0.0210806	0.229867	0.729196	0.584298	0.298376	0.700819	0.000489793	1.83823e-06	0.449535	0.701008
220	4-methyl-2-oxopentanoate	1656	TRUE	-0.028507	0.0188698	-0.0627253	0.242512	0.0189263	-0.0358435	-0.00427381	-0.128485	-0.297441	0.00394431	-0.00341916	0.894231	0.79847	0.299242	0.0661117	0.893536	0.64196	0.955703	0.123165	0.000278355	0.188113	0.550273	0.947911	0.701008
302	cystine	1656	TRUE	-0.457426	-0.0879905	-0.0623977	0.234781	0.395071	-0.149866	0.108642	-0.0454929	-0.109675	0.00167615	0.016254	0.0320684	0.231586	0.299471	0.0738441	0.00500116	0.0507798	0.155967	0.583382	0.178109	0.574124	0.00432753	0.703059	0.701008
414	malate	1656	TRUE	-0.66017	-0.0142232	-0.060125	0.224655	0.274797	-0.340882	-0.0771896	-0.21459	-0.00123016	0.0101937	0.0109585	0.00132801	0.840982	0.29958	0.0759417	0.0427887	4.02816e-06	0.295608	0.0072697	0.987497	0.000390876	0.045941	0.947911	0.701008
658	X - 13835	1656	TRUE	-1.24679	-0.000412257	-0.0615072	0.311184	0.244981	0.182934	0.101552	-0.00473575	0.205483	0.00715419	0.030206	3.2317e-09	0.995469	0.300112	0.0163767	0.0778262	0.0157066	0.179077	0.953874	0.010586	0.0150908	7.78514e-08	0.997941	0.701008
575	trans-4-hydroxyproline	1656	TRUE	-0.731347	0.0741238	-0.0618912	0.649319	-0.00246861	-0.168441	-0.151231	-0.0714346	-0.199117	0.00837366	0.0159286	0.000559992	0.31032	0.300163	6.45385e-07	0.985912	0.0270881	0.0467822	0.38594	0.0138451	0.00470623	0.004878	0.722863	0.701008
721	X - 22379	1656	TRUE	1.439	0.0465223	-0.059525	0.682997	0.179663	0.0348759	-0.0360535	-0.0586937	-0.0390645	-0.0344168	0.012642	1.82602e-12	0.508616	0.300952	5.49517e-08	0.182201	0.634753	0.622691	0.459617	0.616198	1.73218e-33	0.0203853	0.857172	0.701008
619	X - 11787	1656	TRUE	-2.37993	0.0976507	0.0588675	0.612479	0.0143394	0.0366568	-0.0427561	-0.0116145	-0.165098	0.0353319	0.0215634	4.84761e-32	0.160764	0.301098	8.37815e-07	0.914291	0.613747	0.555289	0.882406	0.0322393	6.22478e-36	6.36718e-05	0.639653	0.701008
159	2-hydroxystearate	1656	TRUE	-0.191311	-0.0442023	0.0621714	0.0886838	0.03145	-0.0444787	0.0232774	0.024848	-0.0288506	0.00698276	-0.0069641	0.372349	0.549847	0.303621	0.501655	0.824043	0.564029	0.762284	0.76564	0.724477	0.0198246	0.223814	0.864295	0.702391
209	androstenediol (3beta,17beta) disulfate (1)	1656	TRUE	-0.0592565	0.154034	-0.0605947	0.583886	-0.0831229	0.00571454	-0.0123633	0.00463206	-0.0495393	-0.0160088	0.0340476	0.776995	0.0326739	0.304073	5.77386e-06	0.546911	0.939441	0.869193	0.954577	0.534986	4.3787e-08	1.08565e-09	0.449535	0.702391
133	1-stearoyl-2-oleoyl-GPE (18:0/18:1)	1656	TRUE	-1.69249	0.129745	0.0608995	-0.0942972	0.134188	0.0399353	0.0540806	0.0579227	-0.0439253	0.0117664	0.0404531	8.81125e-16	0.0736676	0.304494	0.466601	0.333664	0.597634	0.473903	0.478891	0.584464	6.32468e-05	5.99139e-13	0.523809	0.702391
216	4-hydroxyhippurate	1656	TRUE	-0.683682	-0.105602	-0.0614268	-0.172671	-0.0666312	-0.0424149	-0.0455378	0.0672417	-0.0367987	0.0142336	0.000428073	0.00137886	0.151694	0.307777	0.189276	0.636424	0.580944	0.552648	0.418262	0.651886	1.88679e-06	0.940189	0.623782	0.707792
454	N-acetylphenylalanine	1656	TRUE	-1.84606	-0.0351513	-0.0594122	0.501233	0.143726	-0.0925777	-0.120365	-0.133624	-0.0202337	0.0133244	0.0483213	5.79789e-19	0.623119	0.309677	8.69618e-05	0.293679	0.214674	0.106012	0.0976085	0.798363	4.34881e-06	2.71935e-18	0.8775	0.70856
715	X - 21736	1656	TRUE	-1.84107	0.167611	0.0598705	-0.0898757	-0.0906086	-0.0272476	0.0697627	-0.0790677	0.0758221	0.0218453	0.0268566	2.21179e-18	0.020885	0.312873	0.487877	0.514009	0.718834	0.355722	0.333891	0.345307	1.12834e-13	1.76028e-06	0.44522	0.70856
128	1-stearoyl-2-linoleoyl-GPC (18:0/18:2)*	1656	TRUE	-0.898438	-0.0611376	0.0602319	-0.137124	-0.0336648	-0.0516643	-0.1393	-0.0814135	-0.237144	0.0163891	0.00613444	2.24854e-05	0.402692	0.313297	0.293213	0.809707	0.49781	0.0670341	0.323085	0.00337474	3.16313e-08	0.278308	0.778469	0.70856
202	3-methylhistidine	1656	TRUE	-0.728978	0.037357	-0.0605363	0.101746	0.149272	0.160004	0.0880844	-0.0593205	0.123695	0.00585778	0.0140752	0.000625492	0.61109	0.31352	0.437966	0.28829	0.0367927	0.249431	0.473967	0.128354	0.0492463	0.0133671	0.875397	0.70856
675	X - 16134	1656	TRUE	0.530964	0.0186432	0.0606014	-0.0684426	0.29418	0.0710577	0.107421	-0.250517	-0.0690518	-0.00851223	-0.00417922	0.0128262	0.799878	0.313523	0.602234	0.0365761	0.354288	0.160602	0.00252228	0.396461	0.00431091	0.463106	0.947911	0.70856
166	2-methylcitrate/homocitrate	1656	TRUE	-0.733677	0.0344657	0.0603707	0.0812912	0.251998	0.0333256	0.0918398	-0.20897	0.0310068	0.00691981	0.013944	0.000563496	0.638346	0.313969	0.534714	0.0725103	0.663063	0.228971	0.0115043	0.70256	0.0199552	0.0140796	0.882583	0.70856
365	glycolithocholate sulfate*	1656	TRUE	0.191308	0.0908828	0.0608331	-0.201231	-0.10964	0.0683732	0.101311	0.0675444	-0.0851845	0.00137516	-0.0122907	0.372909	0.219414	0.314706	0.127805	0.438784	0.375755	0.188514	0.418316	0.298554	0.646762	0.0320006	0.697494	0.70856
77	1-myristoyl-GPC (14:0)	1656	TRUE	-1.55552	0.00942721	0.0590351	-0.236434	-0.156726	-0.0127385	-0.130475	0.00374816	-0.0950824	0.0204396	0.0216865	1.0555e-13	0.896007	0.316778	0.0663838	0.256128	0.865543	0.0822722	0.963245	0.233827	2.77148e-12	0.000103482	0.965662	0.711096
549	stearate (18:0)	1656	TRUE	-1.07203	-0.0631482	-0.0585346	0.184935	-0.149241	-0.250519	-0.365376	-0.101526	-0.0428743	0.0243357	0.00046381	2.64008e-07	0.379025	0.318611	0.149088	0.277265	0.000820741	1.01302e-06	0.20979	0.58962	6.24813e-17	0.933514	0.772173	0.711215
580	tryptophan betaine	1656	TRUE	1.13456	-0.190061	-0.0589755	-0.184082	-0.114325	0.00459078	-0.122998	-0.133438	-0.0675385	-0.0199437	0.000263265	6.45522e-08	0.00860733	0.318723	0.154147	0.408874	0.951488	0.102439	0.101915	0.399155	1.055e-11	0.962523	0.361071	0.711215
21	1,2-dilinoleoyl-GPC (18:2/18:2)	1656	TRUE	0.701654	-0.0438636	0.0592897	-0.09528	-0.20809	-0.00490663	-0.034695	-0.0148627	-0.211066	0.00351537	-0.0326997	0.000910856	0.547474	0.319989	0.46431	0.135867	0.948564	0.647644	0.856569	0.00894683	0.23447	7.03067e-09	0.864295	0.711927
578	trimethylamine N-oxide	1656	TRUE	-1.59834	0.108661	0.0584881	0.551753	-0.0390939	0.017211	0.0680081	0.000499435	0.00477117	0.02222	0.0153777	2.7035e-14	0.133273	0.322973	1.96146e-05	0.777732	0.819667	0.366756	0.995118	0.952527	3.70026e-14	0.00608253	0.608414	0.71529
523	quinate	1656	TRUE	-0.638206	0.0751842	-0.0594422	0.0120855	-0.017198	0.0103992	-0.0276926	0.0100244	-0.135048	0.0176011	-0.00916945	0.00280912	0.307156	0.323402	0.926754	0.902839	0.892284	0.717875	0.903899	0.0976064	3.72876e-09	0.107814	0.722863	0.71529
421	methionine sulfone	1656	TRUE	-1.19333	0.0957597	0.0578385	0.15343	0.0612811	-0.147274	-0.0843691	-0.0496823	-0.132353	0.0296657	-0.0107629	1.04324e-08	0.182691	0.324935	0.231832	0.655861	0.0494522	0.259451	0.53985	0.0962623	2.42895e-24	0.0531438	0.670163	0.716573
289	cis-aconitate	1656	TRUE	-1.3915	0.0340485	-0.0572751	0.101132	-0.0778042	0.0251545	0.0351153	-0.0872524	0.176013	0.0260293	0.00130826	1.86591e-11	0.633519	0.32663	0.427737	0.569112	0.735601	0.6367	0.278625	0.0260238	2.50121e-19	0.813017	0.882583	0.7171
79	1-oleoyl-2-dihomo-linolenoyl-GPC (18:1/20:3)*	1656	TRUE	-1.57238	-0.0651119	-0.0581837	-0.246045	0.157829	0.0902094	0.112461	0.116065	0.0672784	0.011442	0.0363609	8.41487e-14	0.369888	0.327081	0.0577535	0.25601	0.233659	0.136847	0.15638	0.402742	0.000101943	1.01044e-10	0.765747	0.7171
231	5-HEPE	1656	TRUE	-1.4236	0.136032	0.0574829	0.118517	-0.0262365	-0.0752949	-0.0758731	-0.275229	0.12086	0.0192437	0.0181963	1.26831e-11	0.0604562	0.331887	0.35965	0.849911	0.319129	0.31449	0.000756172	0.131964	5.76057e-11	0.00118452	0.502205	0.724203
419	margarate (17:0)	1656	TRUE	-1.49312	-0.0583108	-0.0560349	0.320312	-0.215471	-0.278304	-0.320875	-0.101152	-0.0544461	0.031199	0.00292945	3.31306e-13	0.409395	0.332247	0.0111546	0.111145	0.000160225	1.29769e-05	0.204451	0.486656	1.35535e-27	0.592568	0.779837	0.724203
603	X - 11381	1656	TRUE	-1.68027	0.0855294	-0.0572629	0.0514648	0.0947951	0.065129	0.103778	-0.118368	-0.017035	0.0193791	0.026277	1.4886e-15	0.238729	0.334669	0.691356	0.494984	0.38974	0.16971	0.148217	0.832171	4.60244e-11	2.95993e-06	0.706338	0.725683
191	3-hydroxypyridine sulfate	1656	TRUE	-0.785339	0.129663	0.0576494	0.171857	-0.0552769	-0.00379029	-0.0165631	-0.0258227	-0.178341	0.0210429	-0.0110128	0.000213707	0.0761609	0.334869	0.188065	0.692775	0.960363	0.827744	0.754146	0.0276087	1.2694e-12	0.0518012	0.523809	0.725683
606	X - 11440	1656	TRUE	0.508329	0.0764232	-0.0572463	0.718157	-0.100249	0.0379285	-0.00860087	-0.00120048	-0.0275989	-0.0178028	0.0151624	0.0160207	0.293482	0.335828	3.23163e-08	0.471437	0.617198	0.909585	0.988325	0.731891	1.58917e-09	0.0071225	0.722863	0.725683
713	X - 21729	1656	TRUE	-0.745245	0.0786354	0.0576905	0.381866	-0.0238463	-0.0435891	0.00973756	-0.0699554	0.158719	0.00531136	0.0167933	0.00047083	0.284405	0.336787	0.00360028	0.865289	0.569445	0.89868	0.398415	0.051023	0.0745673	0.00316009	0.72011	0.725683
714	X - 21735	1656	TRUE	-1.30712	0.0297436	-0.0572105	0.103827	-0.0739389	-0.0859943	-0.0924969	-0.0165967	0.0832539	0.0184272	0.0156398	7.44759e-10	0.684431	0.339012	0.426898	0.597509	0.259953	0.224735	0.840623	0.30425	5.31364e-10	0.00579267	0.898241	0.728391
599	X - 11305	1656	TRUE	-0.805074	-0.0802737	-0.0569881	0.407687	-0.00931974	-0.137479	-0.0257395	-0.22368	-0.192202	0.0185694	-0.00113144	0.000146721	0.272085	0.34028	0.00178596	0.946872	0.0713526	0.735164	0.00665373	0.017558	3.71798e-10	0.841582	0.714252	0.729033
616	X - 11538	1656	TRUE	-0.305083	0.116039	0.0567234	0.135471	-0.237304	-0.120488	-0.161737	-0.230073	-0.053401	0.0181986	-0.0211282	0.150116	0.112272	0.342388	0.299141	0.0896598	0.11392	0.0334924	0.00523721	0.509252	8.14457e-10	0.000188899	0.603062	0.731466
183	3-hydroxy-2-ethylpropionate	1656	TRUE	-1.97755	0.0828712	-0.0546237	0.497367	-0.254562	-0.125629	-0.23415	-0.142504	-0.0624827	0.0283996	0.0249155	5.64836e-22	0.241395	0.344947	8.23278e-05	0.0600251	0.0886467	0.00147553	0.0740427	0.42505	4.13022e-23	5.42358e-06	0.706338	0.734845
208	androstenediol (3alpha, 17alpha) monosulfate (3)	1656	TRUE	1.10614	0.0388157	-0.0548716	0.907756	0.182997	-0.0273965	-0.0445312	-0.108418	-0.136279	-0.0266855	0.011411	1.03239e-07	0.588018	0.34896	1.2965e-12	0.181991	0.713956	0.550538	0.179691	0.0858699	4.13911e-20	0.0397635	0.873003	0.741294
507	pregnanediol-3-glucuronide	1656	TRUE	2.86425	-0.0695943	-0.0511177	-0.253936	-0.0316092	0.0379245	0.083289	0.118009	0.0725241	-0.0500639	-0.0125894	4.67666e-49	0.299373	0.351185	0.0339548	0.805431	0.587708	0.232874	0.118659	0.328734	1.07777e-75	0.0153539	0.722863	0.74392
474	guaiacol sulfate	1656	TRUE	-1.28898	0.168842	-0.0546859	0.444579	-0.0775091	-0.0553984	-0.0990796	-0.0541468	-0.0909218	0.025438	0.00109491	7.50926e-10	0.0193315	0.354137	0.000562271	0.574694	0.461876	0.187351	0.505941	0.255314	3.59753e-18	0.844728	0.44522	0.745174
597	X - 11261	1656	TRUE	-1.78324	0.100804	-0.0537413	0.319258	0.238485	-0.180144	-0.103279	-0.148259	-0.0535069	0.00756645	0.057978	6.12342e-18	0.156955	0.356059	0.0120596	0.0801299	0.0153131	0.163643	0.0649017	0.497464	0.00879247	7.69314e-26	0.631178	0.745174
490	phenol sulfate	1656	TRUE	-1.00285	-0.150168	-0.0550927	0.1347	0.103606	-0.0426623	0.11206	0.040516	0.0918258	0.0123275	0.0136367	2.20458e-06	0.0397343	0.356126	0.301578	0.458405	0.575407	0.140464	0.622712	0.256099	3.13665e-05	0.0158988	0.459696	0.745174
189	3-hydroxylaurate	1656	TRUE	-1.43397	-0.0980786	-0.0540327	0.239084	-0.211692	-0.248992	-0.233466	-0.156962	-0.11719	0.0251636	0.012886	5.68271e-12	0.171721	0.357112	0.0620775	0.123177	0.000880131	0.00177861	0.0524405	0.140278	5.26854e-18	0.0204253	0.64567	0.745174
333	gamma-glutamylalanine	1656	TRUE	-1.06213	0.0739243	0.0549443	0.306083	0.084581	0.0156449	-0.157253	-0.122268	-0.0102626	0.0112496	0.0196801	5.65134e-07	0.312404	0.358458	0.0191606	0.54583	0.837605	0.0390076	0.138452	0.899218	0.000149963	0.000515921	0.723418	0.745174
319	Fibrinopeptide A, des-ala(1)*	1656	TRUE	0.300919	0.0187829	0.0553721	0.084389	0.344842	0.0834856	0.0718387	-0.21229	-0.0642391	-0.00649637	0.000512793	0.159799	0.799056	0.358684	0.521835	0.0145878	0.278032	0.349671	0.0107309	0.431706	0.0299053	0.928497	0.947911	0.745174
227	5alpha-pregnan-3beta,20alpha-diol disulfate	1656	TRUE	2.72299	-0.0501329	-0.0504789	-0.224662	-0.170983	0.0678624	0.0452017	0.0605999	0.00977185	-0.0497517	-0.00670776	3.02934e-44	0.456102	0.358714	0.0614311	0.184061	0.33346	0.51863	0.424377	0.895624	2.49322e-74	0.197912	0.818975	0.745174
223	5,6-dihydrothymine	1656	TRUE	-0.63985	-0.0258199	0.0547877	0.467162	0.0634232	-0.256268	-0.149254	-0.19482	-0.147887	0.00628528	0.017555	0.002725	0.725671	0.362481	0.000377405	0.6524	0.000841493	0.0513776	0.0188882	0.0695225	0.0351629	0.00206768	0.915411	0.750788
499	phenylpyruvate	1656	TRUE	-0.108774	-0.0856686	-0.0550357	0.195892	0.0320886	-0.184744	-0.170419	-0.0955782	-0.280153	0.00457668	0.00159489	0.612689	0.247381	0.363413	0.138536	0.82087	0.0167824	0.0270859	0.252469	0.000635051	0.127515	0.780973	0.71238	0.750788
408	leucylleucine	1656	TRUE	-1.41535	0.0890873	0.0536221	0.0237745	0.0821145	0.162747	0.203158	-0.00402197	0.152091	0.00626912	0.0374199	2.30736e-11	0.22216	0.368803	0.855229	0.5565	0.0325119	0.00749265	0.961021	0.0598077	0.034123	3.57123e-11	0.697494	0.759761
726	X - 22822	1656	TRUE	-2.48731	-0.0409753	-0.0500262	0.632934	0.0723963	-0.0733692	-0.140405	0.0242968	-0.0330197	0.0187274	0.061684	3.07343e-35	0.553832	0.37668	3.03401e-07	0.584628	0.309501	0.0513446	0.75558	0.666578	2.50875e-11	1.21231e-30	0.864295	0.759761
410	linoleate (18:2n6)	1656	TRUE	-1.35904	-0.0902607	-0.0517406	0.24899	-0.240647	-0.266316	-0.26701	-0.0803998	-0.0409228	0.0260001	0.00754288	6.07383e-11	0.207477	0.376823	0.0514938	0.0790362	0.000363064	0.000341253	0.319419	0.605768	3.40967e-19	0.173796	0.697494	0.759761
33	15-methylpalmitate	1656	TRUE	-1.5305	-0.0505444	-0.0508292	0.233132	-0.283319	-0.271399	-0.300306	-0.0891989	-0.0705623	0.0320308	0.00284003	6.51859e-14	0.472554	0.376958	0.0635276	0.0353602	0.000217545	4.14034e-05	0.260969	0.365126	3.03168e-29	0.602269	0.826421	0.759761
126	1-stearoyl-2-docosapentaenoyl-GPC (18:0/22:5n3)*	1656	TRUE	-1.78671	-0.105653	0.0516975	0.0971024	0.193744	0.00197566	-0.0466887	-0.0680466	-0.208981	0.0277999	0.0160523	8.45737e-18	0.140418	0.377627	0.447981	0.157718	0.978916	0.531467	0.399814	0.00845242	1.10814e-21	0.00382758	0.608414	0.759761
524	quinolinate	1656	TRUE	-1.94526	0.00854617	0.051236	0.327207	0.101516	-0.210374	-0.0181234	-0.248109	-0.0843937	0.0166261	0.0462015	4.69724e-21	0.904472	0.378854	0.0100737	0.456268	0.00462233	0.80687	0.00200426	0.284485	8.51447e-09	5.41965e-17	0.968893	0.759761
307	deoxycholate	1656	TRUE	-0.788609	0.0902348	-0.0531387	-0.0724564	-0.0428281	-0.0387585	-0.147103	-0.0691979	-0.0391238	0.00948812	0.0144776	0.000233117	0.221827	0.378899	0.58275	0.761872	0.614915	0.0557426	0.40611	0.632391	0.0015351	0.0113793	0.697494	0.759761
74	1-myristoyl-2-linoleoyl-GPC (14:0/18:2)*	1656	TRUE	-1.68761	0.002874	0.0514443	-0.45646	-0.265505	-0.0409091	-0.083428	-0.0621221	-0.13419	0.022013	0.024767	4.22634e-16	0.967951	0.379071	0.00035207	0.0524142	0.583504	0.262589	0.441242	0.0902339	3.21843e-14	7.80368e-06	0.997941	0.759761
214	4-guanidinobutanoate	1656	TRUE	-1.25659	0.0842337	0.052359	0.453961	-0.109259	-0.0473128	-0.154229	-0.155219	-0.0849622	0.0146905	0.0218991	3.10959e-09	0.249143	0.380956	0.000504827	0.434699	0.534888	0.0426816	0.0596875	0.29383	7.17532e-07	0.000109529	0.71238	0.759761
287	cinnamoylglycine	1656	TRUE	-0.235619	0.0744434	-0.0516749	-0.255071	-0.407089	-0.0751345	-0.0199231	0.0382117	0.0741725	0.0213693	-0.0326436	0.260447	0.302292	0.38116	0.0477777	0.00319972	0.318234	0.790876	0.638702	0.353314	2.82819e-13	5.21102e-09	0.722863	0.759761
329	fructose	1656	TRUE	-0.215187	0.0155032	-0.0530333	-0.0512917	0.115974	-0.00961165	-0.0364905	-0.117126	-0.0926763	-0.00125791	0.0133212	0.317975	0.834655	0.382491	0.698946	0.414492	0.901264	0.636983	0.162002	0.259797	0.676185	0.0205702	0.947911	0.759761
372	guanosine	1656	TRUE	0.386254	0.000815124	0.0524055	-0.0796437	0.109281	0.162875	0.169416	-0.205049	0.0760041	-0.00633145	-0.00531391	0.0697427	0.991141	0.382597	0.543467	0.436594	0.0334155	0.0266395	0.0132543	0.349781	0.0334206	0.349976	0.997941	0.759761
396	isoleucine	1656	TRUE	-2.36029	0.0701716	-0.0495982	0.642473	0.0181745	-0.223981	-0.299022	-0.202794	-0.253091	0.0274567	0.0445487	1.18889e-31	0.312647	0.382746	2.25419e-07	0.891297	0.00200389	3.58382e-05	0.0096682	0.00100625	1.97887e-22	1.26993e-16	0.723418	0.759761
196	3-methyl-2-oxobutyrate	1656	TRUE	0.0680173	-0.000930768	-0.0528875	0.0302161	0.0448046	0.0412112	0.0827006	-0.0588994	-0.152763	-0.000333435	-0.00128275	0.751912	0.989986	0.383096	0.819514	0.752215	0.59422	0.284112	0.48128	0.0628524	0.911714	0.823281	0.997941	0.759761
440	N-acetylalanine	1656	TRUE	-1.56412	0.0429317	-0.0509267	0.389873	0.140381	-0.134223	-0.111093	-0.0401122	-0.0111265	0.0154582	0.0325195	4.72548e-14	0.548256	0.383729	0.00226325	0.304926	0.0719415	0.135628	0.618896	0.888249	9.76004e-08	4.31141e-09	0.864295	0.759761
340	gamma-glutamylleucine	1656	TRUE	-2.4675	0.0607751	0.0495694	0.675768	-0.0665851	-0.0392862	-0.210093	-0.15214	-0.0128992	0.0312191	0.035815	3.31859e-34	0.383531	0.384694	5.75583e-08	0.617831	0.589181	0.00380955	0.0530688	0.867347	2.47597e-28	3.34704e-11	0.773352	0.759761
199	3-methylglutaconate	1656	TRUE	-0.0656068	0.043008	0.0526013	-0.33958	0.167709	0.0574881	-0.12993	0.0655643	-0.0194025	0.00362984	-0.00489249	0.760066	0.561358	0.384932	0.0102206	0.236559	0.456693	0.0918983	0.432358	0.812937	0.226693	0.393597	0.868604	0.759761
96	1-palmitoyl-2-dihomo-linolenoyl-GPC (16:0/20:3n3 or 6)*	1656	TRUE	-2.01349	-0.0626736	-0.0505429	-0.245656	-0.00734787	0.0143694	-0.0531379	-0.0354856	-0.116689	0.0157545	0.0496885	2.41026e-22	0.379926	0.38647	0.053938	0.957098	0.846964	0.474567	0.659333	0.139849	5.23592e-08	2.51774e-19	0.772173	0.760532
670	X - 15503	1656	TRUE	-2.64341	0.0806411	-0.0494239	0.295667	0.0482565	-0.0639395	-0.0240419	-0.0858833	-0.00560403	0.0321524	0.0398921	9.2809e-39	0.249134	0.387652	0.0179654	0.718547	0.38102	0.741377	0.276435	0.942342	9.13613e-30	1.82561e-13	0.71238	0.760532
346	gamma-tocopherol/beta-tocopherol	1656	TRUE	0.0574495	-0.105128	0.0520952	-0.141254	0.21081	0.0928084	0.0253482	0.0861248	0.0621361	-0.011039	0.0178159	0.788817	0.155022	0.38877	0.284614	0.136177	0.228782	0.741897	0.301594	0.447833	0.000231083	0.0018613	0.626757	0.760532
296	creatinine	1656	TRUE	-1.2541	0.119816	-0.0507176	0.874949	0.0712438	-0.0178146	-0.0591415	-0.0611801	-0.0718208	0.0176575	0.0137772	2.00516e-09	0.0964385	0.389436	1.05871e-11	0.605461	0.812692	0.430595	0.451632	0.368171	1.52528e-09	0.0135851	0.571037	0.760532
509	pregnenolone sulfate	1656	TRUE	2.08372	0.0512636	-0.048881	0.695678	-0.0530347	0.0462533	0.0917589	0.0619736	-0.0336255	-0.038865	-0.00566732	5.80364e-25	0.461423	0.390379	2.177e-08	0.69049	0.52408	0.20541	0.4298	0.662631	3.85088e-43	0.293122	0.820246	0.760532
563	taurodeoxycholate	1656	TRUE	0.277255	0.028049	0.0516861	-0.517166	0.03429	-0.0564201	0.000150035	-0.0324551	-0.0167642	0.000308492	-0.0105298	0.197589	0.705303	0.394045	9.42783e-05	0.809088	0.465843	0.99845	0.698003	0.838259	0.918302	0.0667949	0.905535	0.761307
687	X - 17178	1656	TRUE	0.205452	-0.0815374	-0.0514693	-0.0638498	-0.0777624	0.0662093	-0.0885176	-0.0847194	-0.0294987	0.00179296	-0.00961867	0.338715	0.270651	0.395072	0.629041	0.582993	0.391153	0.250687	0.310142	0.718918	0.550265	0.0933793	0.714252	0.761307
45	1-dihomo-linolenoyl-GPE (20:3n3 or 6)*	1656	TRUE	-1.18295	0.0156136	0.0511473	-0.00676966	0.0639832	-0.00126443	-0.0216996	0.0252256	-0.00318253	0.0109087	0.0236969	3.01665e-08	0.831982	0.395306	0.958915	0.649576	0.986858	0.777004	0.761167	0.968847	0.000256645	3.21695e-05	0.947911	0.761307
238	5-oxoproline	1656	TRUE	-0.707448	0.0272501	-0.0507457	0.458521	-0.133356	-0.0294056	-0.225071	-0.0175007	-0.046116	0.0140041	0.00228395	0.000895016	0.71049	0.397861	0.000469028	0.342456	0.700971	0.00323042	0.832581	0.570502	2.54583e-06	0.687902	0.907734	0.761307
32	13-HODE + 9-HODE	1656	TRUE	-0.383249	-0.0368286	0.0512333	0.149869	0.00661355	-0.115024	-0.129034	-0.131853	-0.0112024	0.00516973	0.00740477	0.0750798	0.619716	0.398477	0.258088	0.962855	0.137311	0.094903	0.115153	0.891568	0.0858126	0.197649	0.875397	0.761307
184	3-hydroxy-3-methylglutarate	1656	TRUE	-1.71353	0.0778169	0.0496478	-0.103002	0.23492	-0.101945	-0.205809	-0.109409	-0.0316256	0.024798	0.0200935	2.30527e-16	0.279673	0.398907	0.422927	0.0880971	0.174546	0.00602626	0.177725	0.691532	1.96568e-17	0.000313104	0.714252	0.761307
228	5alpha-pregnan-3beta,20alpha-diol monosulfate (2)	1656	TRUE	2.85138	-0.062056	-0.0460512	-0.225704	-0.0391518	0.120792	0.0712399	0.154143	0.0404279	-0.0503069	-0.0123848	8.73323e-49	0.353991	0.400204	0.0590379	0.75991	0.0836983	0.306751	0.0411964	0.585533	1.17842e-76	0.0169223	0.753088	0.761307
672	X - 16071	1656	TRUE	-1.23692	0.0705111	0.0499551	0.313111	0.346183	-0.00162817	0.162384	-0.076366	0.223371	0.0103803	0.0235172	4.36179e-09	0.331652	0.400237	0.0157703	0.0127458	0.982855	0.0317553	0.351171	0.00548065	0.000424337	2.90778e-05	0.737877	0.761307
648	X - 12748	1656	TRUE	-2.11967	0.109264	0.049088	0.155102	-0.127316	-0.0202364	-0.133635	-0.0353298	0.141486	0.0293571	0.0236119	1.65033e-24	0.126489	0.401104	0.224452	0.352108	0.786144	0.0726222	0.661286	0.0739405	4.27229e-24	2.01081e-05	0.608414	0.761307
7	1-(1-enyl-palmitoyl)-2-linoleoyl-GPE (P-16:0/18:2)*	1656	TRUE	-0.353208	-0.00284449	0.0506059	0.0737772	-0.202801	-0.0617872	-0.0209979	-0.0431605	-0.255964	0.00857339	-0.00119518	0.0987584	0.969231	0.401291	0.575292	0.15067	0.421832	0.784463	0.603768	0.00172067	0.00414255	0.834244	0.997941	0.761307
240	7-alpha-hydroxy-3-oxo-4-cholestenoate (7-Hoca)	1656	TRUE	-1.25062	-0.0177504	-0.0498378	0.177755	0.203865	-0.136534	-0.0491258	-0.00978011	0.0427842	0.00510734	0.0403325	3.28855e-09	0.807516	0.4028	0.171841	0.143664	0.0724066	0.517201	0.90525	0.595888	0.0838523	8.83101e-13	0.947911	0.761307
635	X - 12230	1656	TRUE	-0.151666	0.177013	0.0502332	0.00417622	-0.170093	0.0363765	-0.0751825	-0.0376141	-0.161157	0.01415	-0.0216005	0.476667	0.0159614	0.402926	0.9746	0.226235	0.634958	0.325544	0.649777	0.0475538	2.02812e-06	0.000146554	0.44522	0.761307
269	betaine	1656	TRUE	-0.180646	0.0948544	0.0496976	0.670046	0.255176	0.0877164	-0.00780355	-0.00964187	-0.0686535	0.00819182	-0.0117349	0.392925	0.193095	0.404283	2.62463e-07	0.0672935	0.248577	0.918085	0.906614	0.394938	0.00557333	0.0376234	0.684941	0.761957
139	21-hydroxypregnenolone disulfate	1656	TRUE	1.57119	0.03597	-0.0487971	0.498072	-0.0502603	-0.0372859	-0.0567974	-0.061959	-0.103826	-0.0292796	-0.000898612	4.80631e-14	0.616647	0.40619	0.00010361	0.714702	0.618849	0.447684	0.444484	0.19191	9.25039e-24	0.871718	0.875397	0.763636
93	1-palmitoyl-2-arachidonoyl-GPC (16:0/20:4n6)	1656	TRUE	-1.26604	0.0725243	-0.0494832	-0.192204	-0.0224939	-0.0341289	-0.0353622	-0.204275	-0.153718	0.013784	0.0251425	2.34659e-09	0.320962	0.407544	0.140749	0.872198	0.654332	0.642052	0.0131804	0.057466	3.28866e-06	8.89152e-06	0.73129	0.764272
193	3-methoxycatechol sulfate (1)	1656	TRUE	-0.723019	0.0254352	-0.049926	0.120122	-0.0707468	-0.0879312	-0.0661622	-0.192808	-0.137662	0.0149032	0.00225547	0.000746368	0.730732	0.408683	0.36271	0.6169	0.254034	0.389849	0.0207041	0.0925401	6.59557e-07	0.693556	0.91585	0.764501
650	X - 12798	1656	TRUE	-0.48968	-0.00991928	-0.049515	0.180581	0.382925	-4.35243e-05	0.020703	-0.0569534	-0.0620164	0.00302845	0.0134595	0.0223578	0.89321	0.412447	0.171111	0.00676384	0.999549	0.787829	0.4943	0.448468	0.312131	0.0186769	0.965662	0.769094
65	1-margaroyl-2-oleoyl-GPC (17:0/18:1)*	1656	TRUE	-1.46584	0.0586137	0.0471878	0.0386715	0.0383249	0.0222133	-0.0639585	0.0570069	-0.103386	0.0337396	-0.0104155	8.54797e-13	0.406701	0.413944	0.759174	0.776784	0.76307	0.384492	0.474256	0.186278	5.04843e-32	0.0569544	0.779837	0.769094
330	fumarate	1656	TRUE	-0.602663	0.0160223	-0.0486483	0.605127	-0.0665769	0.0206309	-0.149359	0.0315762	0.102304	0.0133035	-0.0034663	0.0043668	0.825984	0.414244	3.3179e-06	0.633065	0.786085	0.0489983	0.700824	0.204886	6.73642e-06	0.539132	0.947911	0.769094
154	2-hydroxyglutarate	1656	TRUE	0.339465	-0.00661999	0.0494737	0.139674	-0.0818904	0.00459091	-0.000841618	0.0694213	-0.103674	-0.00425824	-0.00490145	0.115157	0.928975	0.415229	0.292252	0.56447	0.952745	0.991315	0.407188	0.207438	0.157378	0.394155	0.977311	0.769094
473	oleoylcarnitine (C18:1)	1656	TRUE	-1.98443	0.0095021	-0.0470688	0.512865	-0.138536	-0.0683554	-0.181855	0.0490849	0.0841974	0.0271974	0.024206	5.62139e-22	0.893507	0.417346	5.20226e-05	0.307747	0.355893	0.0138579	0.539745	0.28406	3.41203e-21	1.06711e-05	0.965662	0.770045
394	isobutyrylcarnitine (C4)	1656	TRUE	-0.943298	-0.01713	0.048203	0.330007	0.0253872	0.0119439	-0.083655	-0.0396329	-0.142527	0.0176609	0.00270563	9.33208e-06	0.815367	0.421597	0.0117604	0.856484	0.875964	0.273363	0.63189	0.0793291	2.90148e-09	0.633928	0.947911	0.770045
475	ornithine	1656	TRUE	-1.61008	0.0727878	-0.0469585	0.421219	0.0787723	-0.0478895	-0.231639	0.032465	-0.0738281	0.0277501	0.00947409	8.38566e-15	0.30868	0.421828	0.000969841	0.564793	0.520806	0.00185925	0.687224	0.351085	1.0564e-21	0.0871129	0.722863	0.770045
36	(16 or 17)-methylstearate (a19:0 or i19:0)	1656	TRUE	-1.40892	-0.00742165	-0.0466	0.3911	-0.194132	-0.219767	-0.182085	-0.0697793	0.0492172	0.03105	-0.0032129	8.58089e-12	0.916886	0.422889	0.00207176	0.153712	0.00305129	0.0139201	0.38427	0.531978	4.92068e-27	0.559683	0.976626	0.770045
146	2-arachidonoyl-GPC (20:4)*	1656	TRUE	-0.326555	0.0172642	0.0484804	0.0732179	0.0240668	-0.09312	-0.0563933	-0.0766893	-0.0751867	0.00566488	0.00288722	0.128732	0.815757	0.423555	0.579987	0.865209	0.228255	0.46473	0.358719	0.359447	0.0593627	0.614873	0.947911	0.770045
306	deoxycarnitine	1656	TRUE	-0.387037	0.165601	0.0477536	0.888779	0.148957	-0.022886	-0.0548955	-0.0324697	-0.153849	0.00318463	0.00797314	0.068423	0.0236973	0.424995	1.05548e-11	0.287649	0.764411	0.471371	0.69411	0.0577174	0.283377	0.159671	0.44522	0.770045
12	1-(1-enyl-palmitoyl)-GPE (P-16:0)*	1656	TRUE	-0.874354	0.0930492	0.0477637	0.245535	0.0274417	0.0379302	0.0255204	0.0406458	0.150116	0.0148768	0.000886986	3.90579e-05	0.204124	0.425298	0.0605737	0.844832	0.619707	0.737966	0.622799	0.0642884	5.52866e-07	0.875799	0.697494	0.770045
355	glycerol	1656	TRUE	-2.40201	0.00159275	-0.0458556	-0.199347	-0.262943	-0.257997	-0.194245	-0.201862	-0.0261289	0.0258855	0.0489143	5.77829e-32	0.98194	0.425391	0.112587	0.0508226	0.000439262	0.00800671	0.0109577	0.737345	1.15926e-19	2.80448e-19	0.997941	0.770045
583	uracil	1656	TRUE	-0.442794	-0.10596	0.048352	0.192981	-0.100498	0.148622	-0.0418736	0.0242969	0.0327017	0.00356347	0.00883608	0.039912	0.15373	0.425954	0.14569	0.479543	0.0550921	0.588179	0.77178	0.690939	0.236781	0.124564	0.626757	0.770045
109	1-palmitoyl-2-palmitoleoyl-GPC (16:0/16:1)*	1656	TRUE	-2.24478	0.0490092	-0.0461681	-0.247141	-0.202201	0.0546115	0.00345105	0.0081398	-0.0174057	0.0236428	0.040568	1.22468e-27	0.490148	0.426568	0.0513198	0.136787	0.461009	0.962772	0.919049	0.824835	2.21599e-16	1.63923e-13	0.83731	0.770045
712	X - 21666	1656	TRUE	-0.587402	0.0841546	-0.0479067	0.189553	0.237716	-0.0519622	-0.0977623	0.0375277	-0.0509342	-0.00196406	0.0278075	0.00605569	0.253931	0.427006	0.150125	0.0921577	0.499467	0.203006	0.651896	0.532901	0.511418	1.1309e-06	0.714252	0.770045
273	biliverdin	1656	TRUE	0.704217	-0.111627	0.0475553	0.255142	-0.0877953	-0.00285133	-0.181476	-0.0756147	-0.0465558	0.00221315	-0.0294251	0.000960764	0.128908	0.428841	0.0519415	0.532557	0.970339	0.0177324	0.361732	0.56738	0.457832	2.36604e-07	0.608414	0.771503
636	X - 12339	1656	TRUE	-1.09442	0.028357	-0.0468791	0.0895261	-0.176123	-0.0239155	-0.011651	-0.0495417	-0.178744	0.0121536	0.0207152	2.63055e-07	0.698755	0.433923	0.493826	0.209072	0.754355	0.878609	0.548811	0.0275938	4.30511e-05	0.00026198	0.905535	0.778782
369	glycylvaline	1656	TRUE	-1.18975	-0.0149413	-0.0466567	0.066453	-0.240352	-0.0788669	-0.0613548	0.143658	0.0930069	0.0138191	0.0192182	2.14131e-08	0.838322	0.435815	0.611302	0.0862906	0.301827	0.420928	0.0819252	0.251367	3.2561e-06	0.000702477	0.947911	0.779701
742	X - 24097	1656	TRUE	-1.57378	-0.000583286	-0.0457291	-0.309965	-0.137854	-0.0446639	-0.125606	-0.11379	-0.233518	0.0215556	0.0231402	4.46481e-14	0.993525	0.436508	0.0157366	0.31622	0.551375	0.0932479	0.160385	0.00334703	1.40817e-13	3.22945e-05	0.997941	0.779701
517	pyridoxate	1656	TRUE	-0.450886	0.0010985	-0.046263	0.172893	-0.301768	-0.101857	-0.106023	-0.00927091	-0.0341672	0.0130473	-0.00599074	0.0335909	0.988016	0.439133	0.185544	0.031063	0.181825	0.163783	0.910503	0.6731	1.08515e-05	0.290232	0.997941	0.781656
486	pantothenate	1656	TRUE	-1.77699	0.0581985	-0.0449849	0.266491	-0.0714724	-0.0254171	-0.0774703	-0.112005	0.0331616	0.0314041	0.00755021	9.18589e-18	0.41472	0.440669	0.0364816	0.60066	0.732735	0.297012	0.163952	0.674702	1.91629e-27	0.171876	0.783591	0.781656
668	X - 15492	1656	TRUE	-2.59237	0.0830198	-0.043474	0.733598	0.173413	-0.138362	-0.0815475	-0.0991856	-0.0541717	0.0225655	0.0580929	2.41755e-38	0.228978	0.441015	2.63078e-09	0.18912	0.054593	0.25636	0.202498	0.478384	7.3936e-16	1.62114e-27	0.699965	0.781656
594	X - 09789	1656	TRUE	-0.77323	-0.0894602	-0.0455834	0.381361	-0.0504894	-0.0293075	0.0178878	0.0154335	-0.0881576	0.023646	-0.016257	0.000235779	0.217085	0.44176	0.00321176	0.715821	0.698267	0.812605	0.850231	0.271998	8.56758e-16	0.00377796	0.697494	0.781656
53	1-eicosapentaenoyl-GPC (20:5)*	1656	TRUE	-1.78926	0.1062	0.044758	-0.0170543	0.0590401	0.0820965	0.0994145	-0.0108886	0.00116194	0.0328134	0.001577	6.78571e-18	0.137782	0.444271	0.893823	0.666343	0.271388	0.182051	0.892667	0.9883	1.19032e-29	0.775991	0.608414	0.781664
744	X - 24240	1656	TRUE	-1.86489	0.0988356	0.0446948	0.50641	-0.0135538	-0.0160207	-0.169614	-0.105701	0.0220834	0.0271347	0.0191723	2.59686e-19	0.167132	0.444821	7.36968e-05	0.921135	0.830018	0.0227719	0.190161	0.780429	8.48462e-21	0.000540042	0.641242	0.781664
467	N-palmitoylglycine	1656	TRUE	-0.86686	-0.00161538	-0.0452826	0.24157	-0.526799	-0.0980622	-0.11325	0.0117271	0.0205996	0.0197912	-0.00333846	3.95573e-05	0.982272	0.446156	0.0627552	0.000152506	0.195948	0.134559	0.886256	0.798027	1.89599e-11	0.553223	0.997941	0.781664
579	tryptophan	1656	TRUE	-1.0737	0.0639606	0.0453034	0.426839	0.0229236	-0.0932071	-0.203148	-0.154585	-0.226684	0.0177011	0.0105914	3.68471e-07	0.379533	0.446498	0.00102287	0.869267	0.219571	0.00734186	0.0596592	0.00491404	2.00343e-09	0.0602671	0.772173	0.781664
717	X - 21810	1656	TRUE	-0.1714	-0.0293462	0.0461697	-0.0571166	0.0196731	0.0704586	-0.0243751	0.148348	0.0451312	0.00022622	0.00425643	0.426898	0.693092	0.447603	0.667072	0.890032	0.36366	0.752857	0.0768771	0.583603	0.940193	0.45985	0.90487	0.781664
317	dodecanedioate (C12-DC)	1656	TRUE	-0.61608	0.0349293	-0.0449254	0.0375701	-0.288566	-0.194551	-0.175247	-0.201369	-0.101112	0.0236544	-0.0173058	0.0033883	0.629825	0.448341	0.771571	0.0374477	0.0100646	0.0201935	0.0137439	0.207674	8.32525e-16	0.0020477	0.88199	0.781664
701	X - 21286	1656	TRUE	-0.366317	-0.020881	-0.0457748	-0.422368	-0.00395571	-0.0728076	-0.0608502	0.031706	-0.077727	0.00651651	0.00388206	0.0877725	0.777679	0.449041	0.00138227	0.9777	0.345271	0.429336	0.703827	0.342547	0.0297809	0.497928	0.944268	0.781664
160	2-isopropylmalate	1656	TRUE	-0.955479	0.0252651	-0.0448618	0.246936	-0.0742904	-0.0601038	-0.288821	-0.256767	-0.168451	0.0133998	0.0165458	6.27902e-06	0.728962	0.451738	0.0578789	0.594408	0.429378	0.000141891	0.00179216	0.0369428	5.83824e-06	0.00339019	0.915411	0.784543
710	X - 21626	1656	TRUE	0.0408604	0.0390154	0.0453048	0.0185418	0.271897	0.117457	0.146451	-0.156335	0.116336	-0.00647531	0.00808075	0.849328	0.598695	0.454801	0.888607	0.0552797	0.128784	0.0577581	0.0614884	0.156427	0.0312365	0.159314	0.875397	0.786505
680	X - 16944	1656	TRUE	-0.794875	0.0632311	-0.0442926	0.0144357	0.198747	-0.215627	-0.12645	-0.134337	-0.0577638	-0.00370685	0.0429342	0.000165126	0.384619	0.456352	0.911491	0.15326	0.00447829	0.094906	0.101441	0.473204	0.208773	2.49355e-14	0.773352	0.786505
102	1-palmitoyl-2-linoleoyl-GPC (16:0/18:2)	1656	TRUE	-1.00527	0.000172211	0.04454	-0.220239	-0.325733	-0.0364304	-0.0907602	-0.0876709	-0.105982	0.0169514	0.00799376	2.24457e-06	0.998124	0.457089	0.0922376	0.0201377	0.633526	0.23401	0.288573	0.19136	1.1515e-08	0.158846	0.998124	0.786505
614	X - 11530	1656	TRUE	1.20411	-0.129627	0.0442616	0.188453	-0.0336339	0.198445	-0.00604124	0.0752666	-0.0905203	-0.00496478	-0.0388821	1.44111e-08	0.0766554	0.459685	0.149467	0.810283	0.00936704	0.93683	0.362005	0.264206	0.0944781	7.04846e-12	0.523809	0.786505
324	erucate (22:1n9)	1656	TRUE	-0.889036	0.0267682	-0.042804	0.444207	-0.10549	-0.243065	-0.191754	-0.177429	-0.0963123	0.0313807	-0.0226854	1.61545e-05	0.706397	0.461284	0.000463884	0.437868	0.0010408	0.00954149	0.0268212	0.220942	1.27699e-27	3.75656e-05	0.905535	0.786505
642	X - 12511	1656	TRUE	-0.405034	0.113631	-0.0439972	0.728538	0.329259	0.00781763	0.0465023	-0.00131824	-0.00608826	0.00182767	0.0103846	0.0569614	0.121281	0.463104	2.64846e-08	0.0189645	0.918604	0.542484	0.987283	0.940237	0.538828	0.0675099	0.608414	0.786505
23	1,2-dipalmitoyl-GPC (16:0/16:0)	1656	TRUE	-1.31414	-0.0845595	0.0431934	0.132543	-0.26046	-0.0825788	-0.166497	-0.178973	-0.24693	0.0291594	-0.00165933	3.21983e-10	0.240463	0.463346	0.302825	0.0588246	0.27178	0.0264142	0.0275906	0.00196394	1.81972e-23	0.766153	0.706338	0.786505
532	serylalanine	1656	TRUE	-0.263848	-0.0131967	-0.0439121	0.0125435	0.355671	0.0924885	0.156419	-0.193701	0.00258336	-0.00260632	0.0144766	0.214455	0.857043	0.463481	0.923609	0.0111739	0.226147	0.0402733	0.0190461	0.974594	0.38028	0.0107265	0.955612	0.786505
564	taurolithocholate 3-sulfate	1656	TRUE	0.218974	0.0573251	0.0442202	-0.33874	-0.0219319	-0.0408515	0.0916641	-0.0428462	-0.0575635	0.0045545	-0.017711	0.306785	0.437621	0.463965	0.0102089	0.876668	0.595904	0.233177	0.606934	0.481488	0.128291	0.00195868	0.804116	0.786505
40	1-arachidonoyl-GPE (20:4n6)*	1656	TRUE	-0.707191	0.0730819	0.044168	-0.149533	0.10822	-0.0767128	-0.0545728	0.0037886	-0.0441283	0.00922437	0.00961553	0.000965817	0.322425	0.464532	0.256873	0.443843	0.319379	0.477871	0.96372	0.589491	0.00206994	0.0927728	0.73129	0.786505
422	methionine sulfoxide	1656	TRUE	-0.643334	0.0380072	0.0441636	0.27636	-0.112612	-0.0951661	-0.161244	-0.117266	-0.0293052	0.00827054	0.0112288	0.00269506	0.607046	0.464837	0.0362392	0.425841	0.217003	0.0361013	0.159408	0.720257	0.00578172	0.0497838	0.875397	0.786505
632	X - 12206	1656	TRUE	-1.0807	0.00739406	0.0437128	-0.0419252	-0.00990026	0.068021	-0.0113691	-0.109477	-0.00852003	0.0196052	0.00295831	3.73182e-07	0.919645	0.465738	0.748714	0.943725	0.373626	0.881558	0.185342	0.916393	4.21047e-11	0.602272	0.977311	0.786505
518	pyroglutamine*	1656	TRUE	-0.165697	-0.0201698	-0.0420936	1.6498	0.161277	-0.0597248	-0.0558654	-0.0456619	-0.107372	0.00707263	-0.00758226	0.419166	0.77541	0.466464	4.9451e-39	0.233185	0.417987	0.447823	0.566817	0.170183	0.013617	0.16611	0.944268	0.786505
337	gamma-glutamylglycine	1656	TRUE	-0.229551	0.0813825	0.0436718	0.10008	-0.104857	0.0404811	-0.0985775	-0.0900915	0.0221834	0.0104088	-0.0117942	0.284234	0.270698	0.469732	0.448118	0.458304	0.599411	0.200006	0.279596	0.786282	0.0005124	0.0392997	0.714252	0.788636
354	glycerate	1656	TRUE	-0.56113	-0.0949502	0.0429848	-0.188759	-0.443264	0.0438931	-0.150045	-0.0225391	-0.0225184	0.0208168	-0.0178341	0.00783847	0.191774	0.469826	0.146153	0.00144951	0.562927	0.0475476	0.783496	0.779802	1.69366e-12	0.00154736	0.68348	0.788636
276	caprate (10:0)	1656	TRUE	-0.733355	0.0159623	-0.0419606	-0.0270751	-0.334459	-0.383077	-0.470178	-0.287083	-0.388607	0.0246019	-0.00730769	0.000403731	0.823226	0.472605	0.831946	0.0144377	2.75062e-07	2.60457e-10	0.000366976	9.03162e-07	2.04631e-17	0.186663	0.947911	0.788749
736	X - 23765	1656	TRUE	0.888739	-0.135795	-0.0425896	-0.141113	-0.147331	0.110059	0.0097447	0.0418329	-0.08049	0.00627587	-0.0467693	2.45271e-05	0.0614399	0.473104	0.276404	0.288943	0.146163	0.897422	0.609413	0.316747	0.0330341	9.01291e-17	0.502205	0.788749
332	gamma-glutamyl-2-aminobutyrate	1656	TRUE	-1.38663	0.117991	0.042532	0.517848	-0.115688	0.0673279	-0.0785213	-0.138471	0.051924	0.0215471	0.0100766	4.59073e-11	0.104094	0.473643	6.47468e-05	0.404959	0.373939	0.298829	0.0907614	0.51832	2.48513e-13	0.0731024	0.584169	0.788749
198	3-methyladipate	1656	TRUE	-1.37023	0.148405	0.0415141	0.136813	0.137987	-0.0965724	0.0314328	-0.2239	-0.0816965	0.0341108	-0.0136397	2.80931e-11	0.0364789	0.474243	0.280223	0.309486	0.191955	0.670457	0.00513967	0.298425	2.0104e-32	0.0130641	0.450655	0.788749
661	X - 14314	1656	TRUE	-1.01396	0.086716	-0.0430466	-0.0390605	-0.208064	-0.0970633	-0.131043	-0.0236637	-0.0231134	0.0145926	0.0132758	2.13088e-06	0.239498	0.475137	0.766684	0.140243	0.206876	0.0877535	0.775929	0.777073	1.05322e-06	0.0200674	0.706338	0.788749
683	X - 17145	1656	TRUE	0.0214367	0.0207835	0.0424899	0.0473535	-0.174011	0.0196082	0.0201961	0.140792	0.022931	0.0126471	-0.0279282	0.92007	0.777746	0.480333	0.718736	0.216833	0.798497	0.792198	0.0899789	0.778524	2.27769e-05	9.72046e-07	0.944268	0.795617
633	X - 12212	1656	TRUE	-0.128175	-0.0699462	0.0421871	0.228162	-0.232985	-0.00224719	-0.00658196	0.0675675	-0.0517237	0.012449	-0.0200181	0.54897	0.342703	0.483968	0.0830413	0.0986055	0.976686	0.931655	0.416355	0.526308	3.11824e-05	0.000454625	0.746643	0.799877
643	X - 12680	1656	TRUE	-1.07537	0.0814049	0.0414413	0.173955	-0.200459	-0.158695	-0.116858	-0.18676	-0.094317	0.0204194	0.00468088	4.19771e-07	0.266467	0.489005	0.183574	0.152709	0.0378201	0.12546	0.0237798	0.24494	6.23953e-12	0.409361	0.714252	0.806194
120	1-stearoyl-2-arachidonoyl-GPC (18:0/20:4)	1656	TRUE	-1.46506	-0.00887071	-0.0408342	-0.210755	0.253918	-0.0114556	-0.0517942	-0.155759	-0.13163	0.0153792	0.0292192	3.189e-12	0.902563	0.490661	0.103338	0.0670528	0.879529	0.492332	0.0566301	0.100886	1.65633e-07	1.92301e-07	0.968893	0.806194
702	X - 21319	1656	TRUE	0.732591	0.0535634	-0.041247	-0.0255137	0.0910654	-0.109969	-0.0797943	-0.103178	-0.00884046	-0.0207712	0.0156638	0.000566355	0.464631	0.491007	0.845345	0.515889	0.150078	0.295394	0.21165	0.913207	2.68885e-12	0.00576187	0.822124	0.806194
462	N-formylmethionine	1656	TRUE	-0.977674	0.0718111	-0.0409165	0.223287	0.112186	-0.00911916	0.0645347	-0.0132446	-0.075859	0.0168949	0.00397595	4.02848e-06	0.325919	0.493602	0.0871544	0.422544	0.904804	0.396441	0.872359	0.348666	1.19998e-08	0.48251	0.733806	0.807302
127	1-stearoyl-2-docosapentaenoyl-GPC (18:0/22:5n6)*	1656	TRUE	-1.00001	-0.0762617	-0.0409341	-0.204377	0.104797	-0.0446913	-0.0600667	-0.0219378	-0.145482	0.00375457	0.0343817	2.46822e-06	0.297292	0.493828	0.11776	0.454171	0.558175	0.430386	0.790344	0.0725582	0.205712	1.30286e-09	0.722863	0.807302
402	kynurenine	1656	TRUE	-2.39097	0.0933417	0.0394315	0.291211	0.0813719	0.0330657	0.0835148	-0.0136292	-0.00474248	0.019084	0.0529977	4.60312e-31	0.18926	0.497596	0.0218113	0.549794	0.655722	0.259227	0.865031	0.951968	3.61467e-11	6.33793e-22	0.68348	0.81063
186	3-hydroxydecanoate	1656	TRUE	-1.55532	-0.0423016	-0.0395123	0.303712	-0.343745	-0.253096	-0.184905	-0.110758	-0.0239439	0.0283799	0.00946464	6.04727e-14	0.553606	0.498577	0.0172299	0.0118849	0.000679387	0.0128779	0.169032	0.76204	1.11779e-22	0.0870318	0.864295	0.81063
299	cysteine	1656	TRUE	-0.87008	-0.0110897	-0.0407306	0.144775	0.0347936	-0.00873682	0.057608	0.163939	-0.015753	0.00958649	0.0135275	4.7206e-05	0.880397	0.499098	0.271308	0.805135	0.90952	0.45278	0.0485636	0.846939	0.00133806	0.017797	0.961209	0.81063
374	heptanoate (7:0)	1656	TRUE	-0.354199	0.0240321	0.0408715	0.215136	0.224109	-0.120829	0.0720792	-0.148997	0.0835785	0.00526804	0.00330938	0.0999826	0.746089	0.500611	0.104522	0.114564	0.118582	0.350896	0.0750492	0.309161	0.08004	0.564802	0.92102	0.811335
434	N1-methyladenosine	1656	TRUE	-2.45271	0.126694	-0.0386923	0.168955	0.106957	-0.010057	0.0361388	0.0497506	0.0279295	0.0260545	0.0421073	4.54668e-33	0.0726064	0.502485	0.179997	0.428334	0.891329	0.622796	0.531882	0.720779	8.63299e-20	1.31856e-14	0.523809	0.811474
692	X - 17337	1656	TRUE	-2.52192	0.177457	0.0384626	0.439025	-0.0842982	-0.045862	-0.0438575	-0.0823531	0.0172066	0.0316905	0.0346435	3.33554e-35	0.0114894	0.502855	0.000462255	0.530373	0.531179	0.548508	0.298304	0.824845	8.86503e-29	1.88084e-10	0.392729	0.811474
35	16-hydroxypalmitate	1656	TRUE	-0.828365	-0.101659	-0.0395414	0.167882	-0.0684203	-0.303118	-0.285358	-0.250957	-0.242177	0.0169277	0.00811672	8.6369e-05	0.16216	0.506057	0.19609	0.622962	6.44822e-05	0.000163936	0.002214	0.00263561	9.45616e-09	0.149575	0.641242	0.814892
207	4-allylphenol sulfate	1656	TRUE	-1.04411	-0.00641647	0.039084	0.271889	-0.073386	0.0398805	0.0641175	0.0858084	0.0465983	0.0229363	-0.00748793	6.30193e-07	0.929225	0.50816	0.0350555	0.595505	0.596639	0.39392	0.292214	0.56021	4.8843e-15	0.180794	0.977311	0.815811
210	androstenediol (3beta,17beta) disulfate (2)	1656	TRUE	0.760586	0.11517	-0.0390649	0.562606	0.0536681	0.0102056	-0.00562991	-0.0199862	-0.0816571	-0.0251578	0.0204634	0.00028867	0.111245	0.508797	1.31882e-05	0.698133	0.892376	0.940389	0.806397	0.307838	9.52678e-18	0.000258484	0.603062	0.815811
435	N2,N2-dimethylguanosine	1656	TRUE	-2.72467	0.044273	-0.0373993	0.264666	0.119549	-0.164486	-0.0366807	0.0167586	-0.00544118	0.0247498	0.0584423	1.10553e-41	0.52372	0.510041	0.03279	0.368239	0.0231432	0.611852	0.83053	0.943581	1.4896e-18	1.64555e-27	0.862539	0.816065
493	phenylalanine	1656	TRUE	-2.26472	-0.0194463	-0.0376543	0.256514	-0.104221	-0.138168	-0.273522	-0.0690803	-0.231647	0.0271785	0.0403377	1.02755e-28	0.781807	0.511873	0.0407574	0.437912	0.0592188	0.000182596	0.382963	0.00288689	1.34554e-21	1.18993e-13	0.944268	0.816548
427	myo-inositol	1656	TRUE	-1.36001	0.0672565	0.0386456	0.242604	-0.145265	0.016719	-0.144909	0.0399606	-0.019085	0.0291413	-0.00513568	8.73419e-11	0.351971	0.513033	0.0600764	0.293445	0.824456	0.0540672	0.62386	0.811473	2.63432e-23	0.358789	0.753088	0.816548
295	creatine	1656	TRUE	-1.21428	0.129322	0.0386431	-0.800024	-0.111355	0.0529828	0.0287482	-0.0182897	0.00709398	0.0161676	0.0147136	8.18033e-09	0.0748779	0.515062	6.78931e-10	0.422827	0.484174	0.703694	0.823239	0.929686	3.9815e-08	0.00888021	0.523809	0.816548
272	bilirubin (Z,Z)	1656	TRUE	0.795427	-0.123605	0.0388528	0.227997	-0.212421	0.267572	-0.0251497	0.177387	-0.118578	-0.000610797	-0.0324225	0.000181242	0.09144	0.516409	0.0812399	0.129555	0.000460392	0.741495	0.0317202	0.143658	0.837034	1.0878e-08	0.550651	0.816548
377	hexanoylglycine	1656	TRUE	-0.593926	0.00989893	-0.0387051	-0.210924	-0.172638	-0.0351765	-0.052383	0.00853634	0.202161	0.0157092	-0.00807674	0.00534345	0.892853	0.519482	0.10799	0.21959	0.646325	0.493561	0.917964	0.0129827	1.3532e-07	0.155899	0.965662	0.816548
732	X - 23593	1656	TRUE	-1.74644	0.156937	0.0377093	0.46769	-0.0987634	0.0230374	-0.185046	-0.104511	-0.0838203	0.0285	0.0124189	4.52942e-17	0.028559	0.519927	0.000258054	0.471475	0.757985	0.0131449	0.196027	0.290923	1.06325e-22	0.0252792	0.449535	0.816548
248	allantoin	1656	TRUE	-1.37845	0.0559497	-0.0381563	0.379058	0.0448408	-0.139546	-0.232912	-0.134232	0.00188863	0.00835163	0.0412739	5.97775e-11	0.440916	0.520357	0.00345642	0.746869	0.0653748	0.00205937	0.10111	0.981257	0.0045554	2.13108e-13	0.804779	0.816548
664	X - 14939	1656	TRUE	0.380944	0.106526	-0.0381711	0.0782232	0.245546	-0.0495706	0.0364414	-0.0787631	0.061145	-0.0208229	0.0266891	0.0713502	0.143479	0.521423	0.547432	0.0780229	0.513985	0.630717	0.337471	0.448239	1.75931e-12	2.21745e-06	0.612004	0.816548
436	N6,N6,N6-trimethyllysine	1656	TRUE	-1.53756	-0.0402967	0.0378597	0.774614	0.0172895	-0.0570493	-0.112646	-0.0390851	0.00890506	0.0154786	0.0297924	2.34385e-13	0.577418	0.522021	1.99876e-09	0.900581	0.449529	0.134642	0.631795	0.911463	1.3071e-07	1.04569e-07	0.871549	0.816548
233	5-hydroxyhexanoate	1656	TRUE	-0.150747	0.157286	0.0385977	-0.126515	-0.141853	-0.0541999	-0.0971916	-0.019905	0.105095	0.0101048	-0.0142944	0.48241	0.033476	0.52335	0.33815	0.316261	0.4824	0.206922	0.811404	0.199462	0.00075485	0.0125924	0.449535	0.816548
584	urate	1656	TRUE	-2.86522	0.0101959	0.0355735	0.815991	0.182631	-0.0475745	0.0249439	-0.0406721	0.0308312	0.0186209	0.0732943	1.88609e-47	0.88125	0.52382	2.1519e-11	0.162004	0.50398	0.725554	0.597211	0.683311	1.71776e-11	1.02614e-43	0.961209	0.816548
381	homoarginine	1656	TRUE	-1.35466	0.088104	-0.0376567	0.148777	0.0847208	-0.0838919	-0.050968	-0.050422	-0.126598	0.00669165	0.0415139	1.06807e-10	0.223082	0.524185	0.249243	0.540364	0.266055	0.498396	0.536376	0.113868	0.0224839	1.24032e-13	0.697494	0.816548
339	gamma-glutamylisoleucine*	1656	TRUE	-2.31167	0.0862194	0.0365679	0.629854	0.0496175	-0.0541133	-0.188736	-0.138763	0.0336254	0.0275878	0.0364181	9.53851e-30	0.220278	0.524869	5.30861e-07	0.712392	0.460789	0.00995459	0.0802276	0.665939	3.94232e-22	2.30741e-11	0.697494	0.816548
604	X - 11429	1656	TRUE	-2.10635	0.121141	0.0372529	0.218552	0.0379034	0.0164772	0.0264937	0.056312	0.00276217	0.0239063	0.0323697	4.85139e-24	0.0915311	0.525659	0.0882276	0.78262	0.825849	0.722986	0.48672	0.972282	2.17566e-16	5.82969e-09	0.550651	0.816548
360	glycine	1656	TRUE	0.691305	0.0578233	-0.0378493	-0.231125	-0.139659	-0.0270291	-0.0788223	0.0441126	-0.05485	0.00548654	-0.0365144	0.00116484	0.430675	0.528114	0.0777354	0.319901	0.723981	0.30215	0.593969	0.499627	0.0651854	1.31672e-10	0.799674	0.816548
81	1-oleoyl-2-eicosapentaenoyl-GPC (18:1/20:5)*	1656	TRUE	-1.60543	0.189798	0.0372825	-0.200902	0.056766	0.123936	0.180876	0.033076	0.0846283	0.0255597	0.00681922	1.93461e-14	0.0086502	0.528175	0.119612	0.681529	0.100252	0.0162423	0.684937	0.290393	2.78828e-18	0.223223	0.361071	0.816548
44	1-dihomo-linolenoyl-GPC (20:3n3 or 6)*	1656	TRUE	-1.75636	-0.134787	0.0370582	-0.231775	0.197731	0.0665113	0.0832945	0.0337159	0.0192595	0.0168369	0.0334495	4.39453e-17	0.0613929	0.529321	0.071636	0.15154	0.376185	0.266827	0.678192	0.809251	8.28022e-09	2.0474e-09	0.502205	0.816548
466	nonadecanoate (19:0)	1656	TRUE	-0.65976	-0.0494356	-0.036587	0.36118	-0.18761	-0.186918	-0.222027	-0.108718	-0.0353778	0.0277623	-0.0249505	0.00142338	0.488032	0.530206	0.00455033	0.169047	0.0119505	0.00277579	0.176284	0.654037	7.70794e-22	6.21707e-06	0.83731	0.816548
215	4-hydroxychlorothalonil	1656	TRUE	-0.233118	0.106351	0.037652	-0.0438551	0.183999	0.048822	0.110009	-0.192547	-0.0630655	0.00965799	-0.0110532	0.274361	0.14796	0.531011	0.738301	0.190843	0.524306	0.150579	0.0201955	0.438465	0.00119483	0.0522037	0.621598	0.816548
16	1-(1-enyl-stearoyl)-2-docosahexaenoyl-GPE (P-18:0/22:6)*	1656	TRUE	-0.803072	0.13111	0.0365868	-0.0412607	-0.1108	0.0624444	0.0290859	-0.075218	-0.141916	0.0291122	-0.0274839	0.000110955	0.0671257	0.532059	0.746948	0.418766	0.403181	0.696439	0.351653	0.0735044	1.1786e-23	7.22099e-07	0.523809	0.816548
274	butyrylcarnitine (C4)	1656	TRUE	-2.28448	0.220869	-0.0359249	0.387768	0.0387723	-0.0815976	-0.0313935	-0.049313	0.000319848	0.0245757	0.0400733	6.61977e-29	0.00175086	0.533565	0.00209132	0.774038	0.267688	0.669184	0.535529	0.996734	8.89142e-18	2.27962e-13	0.188092	0.817192
370	guanidinoacetate	1656	TRUE	0.701933	-0.0402294	-0.0368295	0.593	0.00863913	-0.0186811	0.0524932	-0.0245877	-0.036229	0.00615613	-0.0402545	0.000863913	0.579616	0.535091	4.81246e-06	0.95043	0.805214	0.487498	0.76401	0.652337	0.0365746	8.25842e-13	0.871549	0.817863
359	glycerophosphorylcholine (GPC)	1656	TRUE	0.00216951	-0.0728539	0.0370152	-0.274374	0.156923	0.237162	0.0820496	0.0904541	0.0330547	0.00834353	-0.0205201	0.991867	0.320642	0.537138	0.036205	0.263604	0.00193904	0.282659	0.274214	0.684056	0.00503265	0.000304128	0.73129	0.818773
26	1,5-anhydroglucitol (1,5-AG)	1656	TRUE	0.305158	0.0757007	0.0374092	0.19553	0.00995233	0.0555057	0.0670176	0.00726013	0.00983323	-0.00804766	0.00166638	0.157169	0.308608	0.538307	0.14082	0.944232	0.474183	0.386601	0.931	0.904929	0.00760122	0.772292	0.722863	0.818773
375	hexadecanedioate (C16-DC)	1656	TRUE	-0.891296	0.0445837	-0.0363931	0.226379	-0.275342	-0.223941	-0.23536	-0.222574	-0.159958	0.0223643	-0.00309728	2.23012e-05	0.538291	0.538953	0.0801311	0.0470147	0.00304269	0.0018052	0.00644419	0.0461555	2.67984e-14	0.580946	0.864295	0.818773
2	1-(1-enyl-palmitoyl)-2-arachidonoyl-GPC (P-16:0/20:4)*	1656	TRUE	-0.626489	0.0474773	-0.0364467	0.17309	-0.233889	-0.0452579	-0.080064	-0.161775	-0.138811	0.0134239	0.000608084	0.00346631	0.520434	0.546235	0.189471	0.0980161	0.556988	0.297865	0.0521566	0.0897114	7.42087e-06	0.915361	0.862539	0.828163
573	thyroxine	1656	TRUE	-1.0837	-0.0529942	-0.0357847	-0.458557	-0.101966	-0.107938	-0.0433965	-0.129177	-0.0813956	0.0138964	0.0186303	3.65049e-07	0.470528	0.551193	0.000470785	0.468083	0.158816	0.570298	0.118812	0.316849	3.06249e-06	0.00105468	0.824796	0.833998
649	X - 12792	1656	TRUE	0.958241	-0.0114278	-0.0354651	0.258657	0.132574	0.113004	0.245259	0.000524663	-0.109913	-0.0127379	-0.0147225	6.70254e-06	0.876191	0.554277	0.0482865	0.344888	0.139683	0.00131914	0.994939	0.175968	1.84647e-05	0.00955356	0.959091	0.836474
745	X - 24241	1656	TRUE	-0.874596	0.133234	0.0353063	0.0767212	0.19866	0.160871	0.0542866	0.0339237	0.0608478	0.0117073	0.00707313	3.8857e-05	0.0690124	0.555638	0.557621	0.156518	0.0353077	0.476679	0.681407	0.45328	8.13759e-05	0.212624	0.523809	0.836474
537	sphingomyelin (d18:1/18:1, d18:2/18:0)	1656	TRUE	-3.15891	0.00433939	0.0327396	-0.429608	0.0365433	0.0156577	-0.046587	0.0108109	-0.00243979	0.0328225	0.0582339	1.21101e-57	0.949145	0.556166	0.000405963	0.778947	0.825382	0.510721	0.887948	0.974165	1.22409e-32	2.16038e-28	0.988583	0.836474
677	X - 16580	1656	TRUE	-1.72648	0.112057	0.0344601	0.0120229	-0.0986916	0.0810183	0.202473	0.0280762	0.187959	0.019451	0.0236413	3.26462e-16	0.124254	0.563158	0.926411	0.47926	0.286667	0.00763372	0.732713	0.0198862	4.70024e-11	2.8233e-05	0.608414	0.844019
502	phosphatidylcholine (18:0/20:5, 16:0/22:5n6)*	1656	TRUE	-2.06323	0.0774887	-0.0336822	-0.0689324	0.0695084	0.0735623	0.016643	-0.063057	-0.0240646	0.0323613	0.0154033	1.98581e-23	0.277143	0.563428	0.588228	0.610442	0.322629	0.822598	0.432924	0.760523	4.4256e-29	0.00528272	0.714252	0.844019
252	alpha-ketoglutarate	1656	TRUE	-0.729294	0.0621649	-0.0343006	0.454757	-0.100759	0.063393	-0.0108706	-0.0764208	-0.128883	0.00521511	0.0185217	0.000636554	0.398296	0.568662	0.000539404	0.474322	0.408935	0.887177	0.357172	0.113763	0.0805491	0.00115647	0.778469	0.849588
463	N-formylphenylalanine	1656	TRUE	-1.18703	-0.0193318	-0.0339017	0.176254	-0.00509316	-0.225316	-0.194732	-0.189776	-0.135634	0.0117976	0.0290617	2.12975e-08	0.79128	0.570283	0.176611	0.970934	0.0031055	0.0104474	0.0212365	0.0935686	6.80611e-05	2.79338e-07	0.947911	0.849588
552	stearoylcarnitine (C18)	1656	TRUE	-0.857682	-0.0360307	0.0335647	0.469668	-0.103528	0.0234793	-0.121441	0.0245559	-0.0491252	0.0199165	-0.00607676	4.69163e-05	0.619818	0.571907	0.000292807	0.456305	0.756614	0.10824	0.764317	0.541293	1.35268e-11	0.279995	0.875397	0.849588
613	X - 11522	1656	TRUE	1.20975	-0.164516	0.0337773	0.159407	-0.0540016	0.228484	0.026015	0.12632	-0.0647746	-0.00507702	-0.0396733	1.17023e-08	0.024418	0.571989	0.222018	0.699463	0.00273188	0.73248	0.125454	0.423586	0.086759	2.43027e-12	0.44522	0.849588
366	glycoursodeoxycholate	1656	TRUE	0.125046	0.0463508	0.0342422	0.0911242	0.42203	0.0481406	-0.00213899	0.0370637	-0.007394	-0.00601902	0.00541644	0.561661	0.532537	0.572794	0.49198	0.00297977	0.5343	0.977928	0.658087	0.928354	0.0456331	0.346341	0.863358	0.849588
600	X - 11308	1656	TRUE	0.55907	0.114498	-0.033689	0.329807	0.242108	-0.0264287	-0.0523008	-0.0196686	-0.0379047	-0.0148229	0.00772477	0.00889671	0.120096	0.575915	0.0121631	0.0858656	0.730877	0.495243	0.812836	0.64214	6.95734e-07	0.175734	0.608414	0.852535
155	2-hydroxyhippurate (salicylurate)	1656	TRUE	-0.47334	-0.0770531	0.0333956	0.0937966	0.117202	-0.15523	-0.183893	-0.158768	-0.286933	0.01147	0.00164607	0.0268386	0.295762	0.579413	0.475986	0.405911	0.0434511	0.0165361	0.0560842	0.000437771	0.000123883	0.773044	0.722863	0.853784
387	hypoxanthine	1656	TRUE	-0.489497	0.0330185	-0.0334584	0.0178967	-0.14738	-0.00519308	-0.198068	-0.0122359	-0.0345123	0.00274237	0.0162686	0.022452	0.655083	0.579826	0.89214	0.297406	0.946299	0.0100541	0.883296	0.673262	0.360201	0.00448529	0.88921	0.853784
219	4-imidazoleacetate	1656	TRUE	-0.502046	-0.0165054	0.0334152	0.310663	0.0288321	0.0398296	-0.126751	-0.0109965	-0.126135	0.00879459	0.00300974	0.0193045	0.823415	0.580568	0.0186624	0.838577	0.605677	0.0997474	0.895114	0.123534	0.00336432	0.599304	0.947911	0.853784
257	arabonate/xylonate	1656	TRUE	-1.62577	0.0161714	0.0325072	-0.0485433	-0.0507664	-0.110926	-0.225413	-0.0791409	-0.137046	0.0257867	0.016152	7.67167e-15	0.822514	0.5813	0.70611	0.712874	0.140192	0.00267045	0.33034	0.0860258	1.13452e-18	0.00381855	0.947911	0.853784
498	phenyllactate (PLA)	1656	TRUE	-0.702849	0.108153	-0.0324427	0.681161	0.287098	-0.124015	-0.228224	-0.195111	-0.244673	0.00551233	0.0213174	0.000891708	0.137983	0.586292	1.67785e-07	0.0396116	0.102968	0.00264144	0.017648	0.00244094	0.0622557	0.000159986	0.608414	0.858094
8	1-(1-enyl-palmitoyl)-2-oleoyl-GPC (P-16:0/18:1)*	1656	TRUE	0.449603	0.0464492	-0.0317485	-0.304392	-0.57972	0.0450878	-0.0161328	0.0945022	-0.0790929	0.0142231	-0.0455577	0.0299603	0.515303	0.586517	0.0169554	2.20104e-05	0.544885	0.828167	0.240494	0.317078	8.96974e-07	1.73498e-16	0.859219	0.858094
60	1-linoleoyl-GPA (18:2)*	1656	TRUE	-0.607678	-0.027949	-0.032429	0.0182018	-0.243189	-0.014918	-0.0224523	0.168891	0.0708529	0.0131268	-0.0030379	0.00459735	0.705314	0.591511	0.890304	0.0855153	0.846564	0.77044	0.042731	0.386623	1.18641e-05	0.595618	0.905535	0.862536
590	xanthine	1656	TRUE	-0.769058	0.0554571	0.0322284	0.0809948	-0.0990139	-0.10079	-0.194112	0.044982	-0.00108704	0.00497664	0.0221046	0.00031139	0.450648	0.591847	0.53725	0.48154	0.188741	0.0112074	0.587437	0.989346	0.09504	0.000103547	0.815897	0.862536
298	cystathionine	1656	TRUE	-2.38424	0.115404	0.0306807	0.309316	0.252158	0.101305	-0.0136274	0.0269844	-0.0133131	0.0311454	0.0282389	1.95659e-31	0.101443	0.594329	0.0139517	0.0614484	0.168083	0.852618	0.734153	0.864508	1.13759e-27	2.2816e-07	0.584169	0.862989
516	pseudouridine	1656	TRUE	-2.21871	0.0882949	-0.0310604	0.266986	0.0911171	0.0739855	0.0244345	0.122221	-0.0133094	0.0235496	0.0373186	8.42194e-27	0.215935	0.594452	0.0361342	0.504561	0.320207	0.742212	0.128797	0.86623	3.9818e-16	1.45016e-11	0.697494	0.862989
260	arginine	1656	TRUE	-1.56737	0.0893751	-0.0311311	-0.0629477	-0.0658855	-0.130885	-0.0829264	-0.0362998	-0.149997	0.0207123	0.0230217	9.0451e-14	0.217509	0.599335	0.626684	0.634734	0.0833969	0.271744	0.656948	0.0616127	1.81802e-12	4.10722e-05	0.697494	0.863882
338	gamma-glutamylhistidine	1656	TRUE	-1.55647	0.10784	0.0310857	0.40621	-0.168102	0.0525394	-0.186372	-0.0663449	0.00172001	0.0224912	0.016249	1.26357e-13	0.136357	0.599491	0.0016777	0.224987	0.48662	0.0134132	0.416463	0.982883	1.84501e-14	0.00375826	0.608414	0.863882
608	X - 11442	1656	TRUE	0.871904	-0.205051	0.0314385	0.150335	0.120068	0.136093	0.0194641	-0.0896564	-0.080753	-0.00145066	-0.0308879	4.14234e-05	0.00515758	0.59993	0.250796	0.392051	0.0751253	0.798702	0.278161	0.319844	0.625554	5.32587e-08	0.314661	0.863882
679	X - 16938	1656	TRUE	-0.490921	-0.163665	-0.0316481	0.0448941	0.268405	0.116098	0.188343	0.0270157	0.114499	0.00886208	-0.00153154	0.0222401	0.0270136	0.600982	0.734087	0.0580695	0.132629	0.0145116	0.746185	0.16238	0.00314824	0.78933	0.44522	0.863882
20	1-(1-enyl-stearoyl)-GPE (P-18:0)*	1656	TRUE	-0.0809656	0.140372	0.0313382	0.250686	0.0046274	0.0870352	0.0524415	0.0770117	0.0757722	0.0106432	-0.0222919	0.703702	0.0557443	0.601422	0.0557137	0.973709	0.25548	0.492404	0.352024	0.351038	0.00034745	8.76073e-05	0.492897	0.863882
598	X - 11299	1656	TRUE	-0.690497	0.101322	-0.0313378	0.0971219	-0.0638207	-0.0875641	-0.0175534	0.0566629	-0.0332477	0.0124897	0.00244622	0.00120623	0.16813	0.602116	0.459395	0.650064	0.253503	0.818598	0.494314	0.682961	2.7928e-05	0.667465	0.641796	0.863882
469	octadecanedioate	1656	TRUE	-0.343118	0.0869998	0.0312617	0.170297	-0.145419	-0.0798378	-0.140754	-0.0674253	-0.0471021	0.0133875	-0.011577	0.108719	0.238027	0.604065	0.195854	0.302691	0.299241	0.0667052	0.417432	0.563996	7.54591e-06	0.0426332	0.706338	0.863882
423	methyl glucopyranoside (alpha + beta)	1656	TRUE	-0.560189	-0.0389102	0.030642	-0.0273283	-0.182978	0.0113258	0.0220309	0.00682279	-0.0126712	0.0200627	-0.0184953	0.00820393	0.594225	0.607878	0.834031	0.190472	0.881825	0.772026	0.933985	0.875504	1.25314e-11	0.00107742	0.875397	0.863882
380	histidyltryptophan	1656	TRUE	-1.24013	0.0149865	-0.0307927	0.000844439	0.047214	0.00329898	0.151612	-0.0776549	0.167833	0.00788099	0.0308985	6.18877e-09	0.838544	0.60862	0.99487	0.737276	0.965702	0.0477051	0.349162	0.0393293	0.00823097	5.82416e-08	0.947911	0.863882
477	orotidine	1656	TRUE	-2.48334	0.0183021	-0.029	0.652192	0.0462177	-0.133252	-0.224306	-0.132221	-0.0395206	0.0265319	0.0476949	6.38232e-35	0.792086	0.609453	1.43649e-07	0.727936	0.0657801	0.0019145	0.0912806	0.607217	4.34447e-21	7.34398e-19	0.947911	0.863882
285	choline	1656	TRUE	-1.0191	0.101604	0.0306977	0.0721633	-0.0249898	0.0410088	0.0583005	0.17014	0.107099	0.0156126	0.00478843	1.7609e-06	0.166859	0.609476	0.582432	0.858974	0.592725	0.446116	0.0401062	0.188201	1.61937e-07	0.400249	0.641242	0.863882
740	X - 24061	1656	TRUE	0.534608	-0.140332	0.030719	-0.16786	-0.422345	-0.0027552	-0.0575537	0.0153328	-0.104165	-0.00169034	-0.015167	0.0124815	0.0570976	0.61049	0.202493	0.00276841	0.971433	0.453557	0.853753	0.202179	0.571967	0.00793111	0.492897	0.863882
746	X - 24242	1656	TRUE	-1.56768	0.103592	-0.0299023	0.252606	-0.0261926	0.0791309	0.0329267	0.0799535	-0.0070434	0.0253263	0.00858334	5.93671e-14	0.149962	0.611267	0.0492981	0.849129	0.291752	0.660268	0.324475	0.929559	3.95493e-18	0.123515	0.623045	0.863882
491	phenylacetate	1656	TRUE	0.230155	0.00982738	0.0307585	-0.0387332	-0.0797403	0.132224	-0.0329072	0.167003	0.0702619	0.00290344	-0.017558	0.284191	0.894455	0.611548	0.769649	0.573729	0.0870312	0.669584	0.0455876	0.391657	0.333728	0.00220986	0.965662	0.863882
595	X - 10358	1656	TRUE	-0.987898	-0.0614107	0.0300914	0.0186966	-0.0404542	0.00585672	-0.117557	0.0415907	-0.117604	0.0246971	-0.00920493	2.74724e-06	0.397756	0.612299	0.885358	0.770962	0.938372	0.119968	0.611561	0.143606	4.99238e-17	0.101715	0.778469	0.863882
254	androsterone sulfate	1656	TRUE	1.0812	-0.0470149	-0.0298861	0.387515	0.0476444	0.0380198	0.0290898	-0.0416644	-0.126679	-0.0246597	0.00765431	3.02108e-07	0.518153	0.615388	0.00285644	0.732187	0.61639	0.700943	0.611595	0.115855	6.34821e-17	0.174349	0.86206	0.866614
747	X - 24278	1656	TRUE	-1.48471	0.213308	0.0295048	-0.00773989	0.337565	-0.0666137	0.0290985	-0.123573	-0.101863	0.0116915	0.0344326	1.65384e-12	0.00324896	0.618551	0.95231	0.014932	0.378244	0.699757	0.130558	0.204347	6.94331e-05	8.56126e-10	0.304522	0.868239
192	3-indoxyl sulfate	1656	TRUE	-0.0668083	-0.0679213	0.0302632	-0.0811792	0.06377	0.0384164	-0.0458156	0.0712943	-0.00527036	-0.00196982	0.00626839	0.756943	0.361302	0.618851	0.541183	0.654218	0.620602	0.554198	0.395496	0.948993	0.513815	0.276685	0.756569	0.868239
645	X - 12686	1656	TRUE	-1.08445	0.000715263	-0.0285882	0.133505	0.0689509	0.0698057	-0.0422664	0.127453	0.0800822	0.0127826	0.015409	1.22134e-07	0.991923	0.620693	0.289976	0.610062	0.34356	0.565561	0.109696	0.306032	8.13531e-06	0.00486486	0.997941	0.869201
497	phenylalanyltryptophan	1656	TRUE	-1.00371	0.0813026	-0.0294303	0.00665802	-0.282733	-0.137933	-0.0849006	0.00627721	0.00393416	0.0142243	0.0127697	2.19906e-06	0.265893	0.622317	0.959307	0.0431848	0.070368	0.264437	0.939284	0.961223	1.58434e-06	0.0240554	0.714252	0.869855
527	ribonate	1656	TRUE	-1.09811	-0.036942	-0.0292718	-0.11857	0.0765363	0.0112772	-0.138353	-0.0424076	0.0486395	0.0144044	0.0156505	2.54345e-07	0.614905	0.625868	0.36585	0.585965	0.88295	0.0703297	0.608576	0.54971	1.31408e-06	0.00592543	0.875397	0.873196
1	1-(1-enyl-oleoyl)-GPE (P-18:1)*	1656	TRUE	-0.668262	0.0993857	0.0290858	0.252969	0.0526389	0.071429	0.0191867	0.0636013	0.168872	0.0130512	-0.00398353	0.00173549	0.176552	0.628574	0.054054	0.708357	0.351769	0.802118	0.443141	0.038098	1.20524e-05	0.484303	0.657262	0.875348
426	methylsuccinate	1656	TRUE	-0.801656	0.191722	-0.0286992	0.201284	0.188414	-0.0821342	-0.129413	-0.169086	-0.190029	0.0166578	0.000976113	0.0001672	0.00900986	0.63254	0.124651	0.179824	0.283439	0.0903925	0.0411062	0.019399	2.19314e-08	0.863686	0.361071	0.875457
124	1-stearoyl-2-docosahexaenoyl-GPC (18:0/22:6)	1656	TRUE	-2.24158	-0.0349191	0.027368	-0.0790781	0.0887646	0.0802356	-0.0393686	-0.079709	-0.0841199	0.0384489	0.0112615	2.69198e-28	0.61808	0.632704	0.527189	0.507766	0.272088	0.58925	0.312887	0.278069	9.29076e-42	0.037888	0.875397	0.875457
325	erythritol	1656	TRUE	-2.61632	0.0773272	-0.026809	0.230975	-0.0696822	-0.0910883	-0.186498	-0.149941	-0.0613428	0.0415367	0.0225554	1.84633e-39	0.259717	0.632715	0.059387	0.595583	0.203096	0.00902796	0.0526351	0.419411	2.09994e-50	2.18891e-05	0.714252	0.875457
694	X - 18249	1656	TRUE	-0.726942	0.145929	0.0285029	-0.0409881	0.396731	-0.00912061	0.0187839	-0.0547643	-0.0226785	-0.00408562	0.0355057	0.000605914	0.0458206	0.63331	0.753423	0.00454971	0.904753	0.804974	0.506326	0.779262	0.167939	3.52525e-10	0.485311	0.875457
716	X - 21796	1656	TRUE	-0.798145	-0.00856358	-0.0285366	0.249475	0.0379975	-0.154625	-0.19807	-0.107502	-0.0238383	0.0119613	0.01149	0.000188677	0.907474	0.63572	0.0579394	0.787543	0.0442342	0.00981915	0.195745	0.770148	6.24189e-05	0.0440657	0.969348	0.876174
100	1-palmitoyl-2-linolenoyl-GPC (16:0/18:3)*	1656	TRUE	-1.04543	0.00204547	-0.0283524	-0.111213	-0.27156	-0.0557948	-0.058633	0.00637164	-0.107675	0.00814733	0.0269389	8.83709e-07	0.977738	0.636158	0.395505	0.0528586	0.465556	0.442288	0.93856	0.184642	0.00612364	2.08318e-06	0.997941	0.876174
239	6-oxopiperidine-2-carboxylate	1656	TRUE	-1.77045	0.0249068	-0.0274485	0.335735	-0.147779	0.0763698	-0.00916344	-0.140401	0.0528628	0.0277174	0.0134916	2.19197e-17	0.729164	0.640725	0.00895655	0.283012	0.308783	0.902616	0.0835035	0.506914	2.0551e-21	0.015453	0.915411	0.879349
465	N-methylproline	1656	TRUE	-0.356437	-0.0719878	-0.0281744	0.0505441	-0.130673	0.071796	0.0231317	0.110096	0.0187579	0.00622166	0.000665051	0.0983709	0.332815	0.642947	0.703351	0.358254	0.35446	0.765005	0.189055	0.819726	0.0390023	0.908033	0.73828	0.879349
586	uridine	1656	TRUE	-0.793519	0.00511148	-0.0278855	0.240619	0.0204435	0.171031	0.0381108	0.157142	0.0560464	0.0101888	0.00700394	0.000204008	0.944664	0.643276	0.0672808	0.884653	0.0259818	0.619126	0.0584698	0.49189	0.000644943	0.219453	0.986649	0.879349
565	tetradecanedioate (C14-DC)	1656	TRUE	-0.803197	0.0593882	-0.0273939	0.200593	-0.217621	-0.207498	-0.215388	-0.120812	-0.107952	0.022522	-0.00839578	0.000133843	0.412615	0.643925	0.1212	0.116662	0.00606375	0.00431473	0.139431	0.178641	1.82497e-14	0.134785	0.783552	0.879349
453	N-acetylneuraminate	1656	TRUE	-1.72302	0.0529866	-0.0272211	0.21364	0.0365436	0.0421415	-0.163235	0.0170362	0.0673047	0.0174393	0.0323771	1.7874e-16	0.462479	0.64431	0.0970955	0.791144	0.575318	0.0296843	0.834069	0.399297	2.46283e-09	6.75086e-09	0.820246	0.879349
106	1-palmitoyl-2-oleoyl-GPC (16:0/18:1)	1656	TRUE	-1.68575	0.0305075	-0.0271977	0.0392731	-0.136846	-0.0118757	-0.0598541	-0.0420681	-0.0828033	0.0226625	0.0220745	1.01614e-15	0.673504	0.645931	0.761312	0.323298	0.875055	0.427174	0.606411	0.301704	1.17377e-14	8.27033e-05	0.893933	0.879544
18	1-(1-enyl-stearoyl)-2-oleoyl-GPE (P-18:0/18:1)	1656	TRUE	-0.509828	0.209972	0.0275703	0.110657	-0.107785	-0.0281699	-0.0378244	0.0413634	-0.189561	0.0110982	-0.00232193	0.0169798	0.00433982	0.646903	0.399886	0.444169	0.713723	0.621626	0.618304	0.0200441	0.000200824	0.683818	0.314661	0.879544
399	isovalerylcarnitine (C5)	1656	TRUE	-2.24868	0.0713813	0.0260566	0.8609	-0.0601177	-0.191983	-0.0983555	-0.128104	-0.0959083	0.0275666	0.0353018	1.18982e-28	0.30645	0.647962	4.93315e-12	0.652623	0.0083654	0.175875	0.103629	0.214626	2.03403e-22	6.55815e-11	0.722863	0.879544
270	betonicine	1656	TRUE	-0.805274	-0.0928433	-0.0273237	-0.0718724	-0.110678	0.0503231	0.0478384	0.18558	0.0512958	0.0162088	-0.00241037	0.00016725	0.208021	0.650416	0.585189	0.432836	0.512967	0.5332	0.0256427	0.529871	5.93908e-08	0.672999	0.697494	0.881285
52	1-docosapentaenoyl-GPC (22:5n6)*	1656	TRUE	-0.100344	-0.109301	0.0271709	-0.200076	0.0896623	-0.0486275	0.0139811	-0.0449393	-0.0919214	0.000639106	0.00399281	0.638634	0.137789	0.651833	0.128171	0.524636	0.526748	0.855313	0.588459	0.25968	0.830545	0.483934	0.608414	0.881616
674	X - 16132	1656	TRUE	-1.45052	-0.0151933	-0.0267	0.270202	-0.0117671	-0.067709	-0.122013	0.0185846	0.0095086	0.0130073	0.0323251	6.38884e-12	0.834612	0.653599	0.0375739	0.932653	0.372374	0.10727	0.820836	0.906062	1.04221e-05	9.71525e-09	0.947911	0.882366
512	prolylglycine	1656	TRUE	-1.81018	0.135245	0.0259989	0.290384	-0.126938	-0.0845023	-0.24605	-0.201605	-0.124373	0.0302636	0.0141722	2.01047e-18	0.0576794	0.655394	0.0224693	0.351843	0.255552	0.000909933	0.0121071	0.114937	1.12968e-25	0.0102243	0.492897	0.882366
625	X - 11880	1656	TRUE	0.315678	-0.00572288	0.026358	0.13377	0.140043	-0.159689	-0.0992438	-0.0310524	-0.00829566	-0.0205198	0.0310439	0.133065	0.937028	0.656284	0.301037	0.312328	0.0345609	0.188164	0.703846	0.917625	2.82695e-12	3.1383e-08	0.98183	0.882366
123	1-stearoyl-2-dihomo-linolenoyl-GPC (18:0/20:3n3 or 6)*	1656	TRUE	-2.64015	-0.130645	-0.0251865	-0.0665537	0.169233	0.0211604	-0.00339805	-0.0242501	-0.0872033	0.0191781	0.0661897	2.71275e-39	0.0597251	0.657081	0.591169	0.202462	0.770013	0.962482	0.756636	0.256393	9.35519e-12	7.38861e-35	0.502205	0.882366
144	2-aminophenol sulfate	1656	TRUE	-0.378089	-0.037858	-0.0263557	0.637618	-0.139181	0.104799	-0.105121	0.0177993	-0.0313422	0.0129367	-0.0114939	0.0741913	0.603991	0.658757	9.97471e-07	0.319008	0.168675	0.16655	0.828801	0.698172	1.23727e-05	0.0420314	0.875397	0.88304
141	2-aminobutyrate	1656	TRUE	-1.64699	0.114915	-0.0259354	0.479375	-0.0927656	-0.0616025	-0.0715528	-0.163963	-0.105752	0.0230766	0.0202961	3.80356e-15	0.111536	0.660469	0.000201114	0.502012	0.413459	0.341218	0.0440734	0.185992	3.25206e-15	0.000284608	0.603062	0.883759
569	threonate	1656	TRUE	-0.594077	-0.171723	-0.0253431	-0.134892	-0.13708	0.136786	-0.0443039	0.0770085	0.0635919	0.0193415	-0.0158517	0.00501937	0.0186215	0.671039	0.300619	0.3263	0.072358	0.559815	0.349433	0.431328	6.32457e-11	0.00503977	0.44522	0.896155
384	hydantoin-5-propionate	1656	TRUE	-2.20175	0.0596846	0.0242528	0.379976	-0.0438874	-0.182045	-0.254733	-0.232633	-0.216201	0.0247933	0.0424544	8.11337e-27	0.399136	0.675182	0.00264577	0.745933	0.0136824	0.000546974	0.003566	0.00581035	5.73303e-18	9.64927e-15	0.778469	0.896155
555	succinimide	1656	TRUE	0.447271	-0.169302	-0.024434	0.228634	0.129113	-0.0563261	-0.243118	-0.197134	-0.113882	0.00125412	-0.0147675	0.0307996	0.0177065	0.675478	0.0728662	0.344551	0.449377	0.00107023	0.0143326	0.14966	0.664823	0.00756087	0.44522	0.896155
644	X - 12681	1656	TRUE	-2.21293	-0.0120883	-0.024374	0.426903	-0.0236594	0.0661655	-0.0687659	-0.0170133	-0.0741796	0.0233057	0.0402827	9.77161e-27	0.865296	0.675697	0.000793761	0.862252	0.373387	0.353966	0.832334	0.347169	7.29409e-16	2.90286e-13	0.956995	0.896155
698	X - 18914	1656	TRUE	-0.47814	0.153066	0.0249537	-0.213745	0.485699	0.0936109	0.121461	0.000135333	-0.0987071	-0.00423685	0.0245915	0.0243829	0.0365558	0.676776	0.102053	0.000526469	0.22028	0.111036	0.998692	0.223388	0.153536	1.4452e-05	0.450655	0.896155
9	1-(1-enyl-palmitoyl)-2-oleoyl-GPE (P-16:0/18:1)*	1656	TRUE	-1.01677	0.0818296	-0.0248291	0.0856568	-0.187068	-0.0486975	-0.0367254	-0.0265242	-0.172619	0.0201229	0.00111485	1.51554e-06	0.261476	0.676883	0.510369	0.179752	0.521754	0.628329	0.74688	0.0324182	9.76795e-12	0.843413	0.714252	0.896155
489	p-cresol glucuronide*	1656	TRUE	-0.654032	0.113347	0.024961	-0.252371	0.0967955	0.132024	0.150157	0.144754	0.13735	0.0115605	-0.00263794	0.00217653	0.123294	0.678084	0.0546561	0.491603	0.0852744	0.0498774	0.0809482	0.0917039	0.000106077	0.6433	0.608414	0.896167
262	aspartate	1656	TRUE	-1.68869	0.00839909	-0.024357	-0.00561759	-0.146448	-0.0682332	-0.115196	0.0691266	0.00803449	0.014148	0.0393533	7.47086e-16	0.907381	0.679864	0.965241	0.289093	0.364881	0.125347	0.395837	0.919942	1.34486e-06	1.9459e-12	0.969348	0.896526
433	N1-Methyl-2-pyridone-5-carboxamide	1656	TRUE	-1.95763	-0.0422686	-0.023862	0.302788	-0.100369	0.0124974	-0.0386482	-0.018717	-0.0443969	0.0231456	0.0310094	3.4731e-21	0.553976	0.682817	0.0175891	0.46271	0.86678	0.603223	0.816243	0.574543	1.32867e-15	2.07252e-08	0.864295	0.896526
39	1-arachidonoyl-GPC (20:4n6)*	1656	TRUE	-0.670648	-0.0323636	0.0246129	-0.266195	0.248274	0.015543	0.00956393	-0.0963244	-0.0141912	0.0120527	0.00225496	0.00171243	0.660614	0.682981	0.0431312	0.0783717	0.839796	0.900816	0.246542	0.861968	5.51952e-05	0.692846	0.890832	0.896526
629	X - 12100	1656	TRUE	-1.48922	0.0620096	0.0241919	0.0659306	-0.0601807	-0.159364	-0.0532978	-0.141654	0.0824804	0.0183685	0.0234374	2.20558e-12	0.396355	0.685698	0.613548	0.667076	0.0366465	0.483785	0.0857841	0.308289	5.79666e-10	3.48714e-05	0.778469	0.896526
242	7-methylguanine	1656	TRUE	-1.3802	0.077701	-0.0240884	0.252047	0.0609952	-0.104657	-0.0559747	0.00169659	0.0208784	0.0125641	0.0295893	6.76879e-11	0.286494	0.686114	0.0528415	0.661933	0.168728	0.460804	0.983535	0.795913	2.13521e-05	1.60037e-07	0.722863	0.896526
700	X - 21258	1656	TRUE	0.219123	0.00592015	0.0244159	0.0198391	0.150476	-0.0237656	-0.08752	0.0728266	-0.181996	0.00710006	-0.0214802	0.306944	0.936172	0.686253	0.880537	0.287452	0.757934	0.255467	0.382363	0.0261967	0.0178591	0.000175685	0.98183	0.896526
235	5-hydroxylysine	1656	TRUE	-1.69109	0.245541	-0.0237013	-0.010809	0.226779	0.0162201	-0.104683	-0.0343475	-0.0960375	0.00896932	0.0487375	5.05621e-16	0.000634541	0.686701	0.932878	0.0991552	0.828709	0.161793	0.671729	0.227527	0.00208639	2.02916e-18	0.105019	0.896526
707	X - 21441	1656	TRUE	0.594502	0.0381149	-0.0239072	0.298743	-0.111109	0.108877	0.114687	0.0210255	0.0515365	-0.0165854	0.00739581	0.0050756	0.602211	0.68926	0.0221453	0.427172	0.15347	0.131948	0.798753	0.524471	2.22756e-08	0.191601	0.875397	0.898307
107	1-palmitoyl-2-oleoyl-GPE (16:0/18:1)	1656	TRUE	-1.60691	0.153907	0.0234611	-0.0274646	0.0651301	-0.072311	-0.0610983	-0.041225	-0.178156	0.0132059	0.038099	1.72427e-14	0.033071	0.691113	0.83134	0.637413	0.33708	0.416406	0.612712	0.0258851	6.49068e-06	9.6366e-12	0.449535	0.89879
245	adenine	1656	TRUE	-1.31267	-0.0628482	-0.023775	0.121763	0.363984	0.0507882	-0.0231957	-0.110869	-0.0363983	0.0140314	0.0240148	7.11935e-10	0.391922	0.69202	0.352939	0.00956493	0.507159	0.7615	0.180495	0.654312	2.43185e-06	2.40149e-05	0.778469	0.89879
574	tiglylcarnitine (C5:1-DC)	1656	TRUE	-1.82654	0.0332722	0.0223531	0.550616	0.0150281	-0.0515808	-0.1473	-0.0744023	-0.146778	0.0296719	0.0140738	8.05233e-19	0.639638	0.700448	1.43024e-05	0.912001	0.486521	0.0464799	0.353198	0.0621395	7.26198e-25	0.0105554	0.882583	0.90732
529	sebacate (C10-DC)	1656	TRUE	-0.911104	0.0686269	0.0227685	0.121226	-0.233834	-0.119454	-0.0722129	-0.0929775	0.0590582	0.0233307	-0.00957075	1.68726e-05	0.34708	0.702801	0.352287	0.0940751	0.116638	0.341928	0.258636	0.46493	3.1915e-15	0.090435	0.749242	0.90732
735	X - 23705	1656	TRUE	1.18777	0.0806682	0.0227449	-0.136538	-0.162581	-0.0349357	-0.00903458	-0.12416	-0.234285	-0.0117512	-0.0204182	2.35542e-08	0.271247	0.704388	0.297014	0.246546	0.647825	0.905785	0.133209	0.00390604	7.73572e-05	0.000323713	0.714252	0.90732
554	succinate	1656	TRUE	-0.60644	0.0146717	0.0226968	0.230507	-0.240796	-0.113859	-0.332718	-0.039144	0.0236063	0.0101141	0.00720037	0.00463053	0.842454	0.706875	0.0803346	0.0882474	0.139219	1.49479e-05	0.638198	0.772733	0.000727593	0.207874	0.947911	0.90732
378	hippurate	1656	TRUE	-0.810355	-0.00724992	-0.0224207	-0.0202553	-0.278678	-0.174984	-0.0960338	-0.0958108	-0.121273	0.0237828	-0.0113826	0.00012941	0.920861	0.707082	0.876471	0.045965	0.0215145	0.206202	0.244324	0.1334	9.18267e-16	0.0440121	0.977311	0.90732
626	X - 11905	1656	TRUE	-0.445585	0.0935926	0.0226995	0.200661	-0.0228946	-0.072757	-0.0579634	-0.128295	0.0885974	0.00724442	0.00342172	0.0379528	0.205977	0.707543	0.128888	0.871562	0.345918	0.451842	0.124224	0.279613	0.0157715	0.550509	0.697494	0.90732
689	X - 17185	1656	TRUE	0.145436	0.0972267	0.0226768	0.254391	0.0808213	-0.0258134	-0.139178	-0.147339	-0.196134	0.00276951	-0.00824443	0.498758	0.189524	0.708209	0.054552	0.568714	0.738427	0.0712334	0.0778962	0.0168403	0.356715	0.150878	0.68348	0.90732
236	5-methylthioadenosine (MTA)	1656	TRUE	-2.27906	0.0334962	0.0217469	0.523862	0.160376	0.0951963	0.156712	0.0385411	0.232154	0.0194235	0.0449	2.13704e-28	0.637444	0.708241	3.66523e-05	0.238323	0.199131	0.0341864	0.63063	0.00318006	1.59009e-11	3.44727e-16	0.882583	0.90732
398	isovalerate	1656	TRUE	-0.840856	0.031642	0.0220548	0.383536	-0.0508811	-0.155853	-0.17384	-0.0182415	0.0983972	0.0100397	0.0143339	7.69164e-05	0.665988	0.712883	0.00338806	0.716797	0.041519	0.0227292	0.825352	0.225415	0.000731138	0.0115774	0.890832	0.911715
334	gamma-glutamyl-epsilon-lysine	1656	TRUE	-1.98549	0.10956	-0.0210333	0.746179	0.00168422	-0.118292	-0.224056	-0.19584	-0.0305919	0.0300681	0.020555	2.77147e-22	0.120122	0.715152	3.06374e-09	0.990038	0.107659	0.00226471	0.0137552	0.695108	7.0274e-26	0.000166517	0.608414	0.913063
601	X - 11315	1656	TRUE	-0.69106	0.00306374	-0.0213407	0.140297	-0.0897444	-0.063052	-0.0492528	-0.104802	-0.114184	0.0246515	-0.0194974	0.000935852	0.96605	0.716895	0.27504	0.514687	0.401041	0.511021	0.196681	0.151975	3.01933e-17	0.0004699	0.997941	0.913738
297	cyclo(leu-pro)	1656	TRUE	-1.50811	0.113869	-0.0209576	-0.153753	0.0135461	-0.132862	0.0284153	-0.0813342	0.0201982	0.0128873	0.0343057	6.72092e-13	0.115507	0.723116	0.233984	0.922052	0.0783123	0.705978	0.318819	0.800941	1.11844e-05	9.21631e-10	0.608414	0.917974
588	valylarginine	1656	TRUE	0.697618	0.0119211	0.021314	-0.305314	0.203745	0.100673	0.0562972	-0.103378	-0.0427446	-0.00784678	-0.01226	0.00111369	0.871599	0.72376	0.0204391	0.14885	0.190688	0.463458	0.21392	0.600713	0.00869946	0.0318572	0.958537	0.917974
444	N-acetylcarnosine	1656	TRUE	-0.950475	0.00867578	-0.0205665	1.1553	0.218442	0.0332895	-0.0140926	-0.0307764	-0.101106	-0.000902998	0.0379797	4.8278e-06	0.903628	0.725549	1.725e-19	0.111122	0.656034	0.850158	0.703299	0.202555	0.755962	7.71401e-12	0.968893	0.917974
621	X - 11805	1656	TRUE	-1.43721	-0.0400552	-0.0208229	0.138466	-0.0548677	-0.107351	-0.15023	0.0532154	-0.00489232	0.0134902	0.0313284	1.05476e-11	0.582499	0.726689	0.287214	0.693929	0.157811	0.0476495	0.51722	0.951647	4.97285e-06	2.83096e-08	0.871549	0.917974
526	ribitol	1656	TRUE	-1.71011	0.0181496	-0.0204611	0.332231	0.156293	-0.0464108	-0.131425	-0.0679124	0.0558172	0.0110454	0.0458041	2.07969e-16	0.80025	0.72718	0.00949168	0.254842	0.535072	0.0784233	0.401167	0.482216	0.000146193	1.65442e-16	0.947911	0.917974
234	5-hydroxyindoleacetate	1656	TRUE	-1.04914	0.130729	0.0207784	0.33013	-0.207183	0.0266103	-0.0675121	0.0129032	-0.0142316	0.0244159	-0.00878351	7.1414e-07	0.0731045	0.727544	0.0112595	0.137725	0.72654	0.373996	0.875357	0.86014	1.52376e-16	0.120007	0.523809	0.917974
294	cortisone	1656	TRUE	0.314018	-0.00378256	-0.0204952	0.30773	-0.120724	0.0626814	0.195112	0.0858573	0.135319	0.00762902	-0.0316108	0.137464	0.958602	0.730854	0.0180334	0.386619	0.409581	0.0101159	0.296132	0.093541	0.00982767	2.13199e-08	0.994302	0.919378
22	1,2-dimyristoyl-GPC (14:0/14:0)	1656	TRUE	-1.02948	-0.108962	-0.0204275	-0.261819	-0.222716	-0.0530356	-0.184885	-0.124281	-0.214405	0.0188971	0.00814134	1.05608e-06	0.13393	0.731101	0.0437122	0.109386	0.484318	0.0145746	0.129547	0.00773598	1.45269e-10	0.148201	0.608414	0.919378
70	1-methyl-4-imidazoleacetate	1656	TRUE	-1.66566	0.0869814	-0.020119	0.210463	0.147602	-0.0513971	-0.106556	-0.0613729	-0.122496	0.0254694	0.0159118	1.61705e-15	0.227382	0.732731	0.101899	0.284397	0.494089	0.155478	0.450088	0.12472	2.85992e-18	0.00435542	0.699965	0.919889
118	1-pentadecanoyl-2-oleoyl-GPC (15:0/18:1)*	1656	TRUE	-1.80227	0.0769148	0.0196802	-0.188488	-0.13019	0.0845175	-0.0580139	0.0330848	-0.0956282	0.0297873	0.0108715	2.37242e-18	0.279297	0.734928	0.137599	0.338559	0.254401	0.433135	0.679848	0.224451	4.99993e-25	0.0483294	0.714252	0.92111
206	4-acetamidobutanoate	1656	TRUE	-2.25825	0.0800332	0.0189683	0.158649	-0.0193856	-0.0165884	0.113587	-0.0437434	0.131529	0.0380504	0.00940427	1.01861e-28	0.252944	0.740349	0.204396	0.884938	0.820295	0.119113	0.579525	0.0897455	5.72325e-41	0.0828336	0.714252	0.925233
571	thymine	1656	TRUE	-1.1509	0.0160132	-0.0197375	0.405268	0.032895	-0.114864	-0.0867549	-0.150844	-0.0922818	0.0170474	0.013772	5.96099e-08	0.826816	0.741531	0.00192918	0.814305	0.132441	0.254887	0.0676158	0.254845	9.24466e-09	0.0151186	0.947911	0.925233
347	gluconate	1656	TRUE	-0.887427	-0.102321	0.019853	-0.312172	0.0594645	0.0335635	-0.00967964	0.0543235	0.0213365	0.00939008	0.0158118	3.34571e-05	0.165209	0.741909	0.0177361	0.673409	0.662541	0.89965	0.513542	0.793831	0.00168515	0.00562424	0.641242	0.925233
511	proline	1656	TRUE	-1.66942	0.0781906	-0.0190939	0.351193	0.117856	-0.0526646	-0.182911	-0.0936002	-0.151934	0.0180781	0.0319615	1.31584e-15	0.277414	0.745636	0.00629469	0.392242	0.48309	0.0146641	0.248933	0.0566501	5.90267e-10	9.89762e-09	0.714252	0.926634
322	epiandrosterone sulfate	1656	TRUE	1.28043	-0.0187596	-0.0192281	0.567697	0.0595297	0.0350196	-0.0412788	-0.0567654	-0.160673	-0.0249512	0.000988191	1.24368e-09	0.796249	0.746175	1.20969e-05	0.668512	0.644016	0.585246	0.488422	0.0458069	2.46933e-17	0.860596	0.947911	0.926634
576	trans-urocanate	1656	TRUE	0.425899	0.0620294	0.0193081	0.0660861	-0.156327	0.056487	0.10319	0.0282637	0.219855	0.00185305	-0.0240151	0.0459723	0.399086	0.748184	0.614877	0.266738	0.461619	0.177834	0.733321	0.00695109	0.534438	2.49471e-05	0.778469	0.926634
719	X - 21892	1656	TRUE	-1.91058	0.0567136	-0.0186172	0.235462	-0.338188	-0.172541	-0.223773	-0.116167	0.0249327	0.030669	0.0175259	1.85973e-20	0.42467	0.748567	0.063423	0.0128516	0.0198869	0.00248049	0.147045	0.751273	1.80524e-26	0.00144551	0.796389	0.926634
343	gamma-glutamylthreonine	1656	TRUE	-0.919001	0.106576	0.0192275	0.368104	-0.248761	-0.00408269	-0.138475	-0.0193799	-0.0184118	0.0175146	0.00122924	1.65994e-05	0.147371	0.749193	0.00507049	0.0771716	0.957564	0.0705649	0.815275	0.821163	4.30442e-09	0.829167	0.621598	0.926634
363	glycocholenate sulfate*	1656	TRUE	-0.0413618	-0.0624424	-0.0193159	0.149002	-0.139189	0.0264166	0.0175414	-0.0526835	-0.132703	-0.00189186	0.00662187	0.84811	0.401535	0.750952	0.262276	0.328462	0.733682	0.82092	0.530257	0.10739	0.530795	0.250706	0.778469	0.927284
291	citrate	1656	TRUE	-0.934558	0.0676686	0.0185796	-0.081906	0.164166	-0.22608	-0.137211	-0.165917	-0.0561234	0.0231096	-0.00556404	9.15671e-06	0.351382	0.754319	0.527586	0.237404	0.00283694	0.0695127	0.0427477	0.485168	4.20497e-15	0.322482	0.753088	0.927943
562	taurocholenate sulfate*	1656	TRUE	0.0253184	-0.0590201	-0.0189902	-0.0341926	-0.0956733	-0.00387477	0.0297	-0.0906804	-0.021884	0.00148825	-0.00285063	0.906717	0.428066	0.755135	0.797085	0.50199	0.960218	0.701669	0.280265	0.790719	0.622136	0.621148	0.79703	0.927943
293	cortisol	1656	TRUE	-0.24065	0.0885851	-0.0185178	0.189569	-0.0768058	0.0163746	0.0724805	-0.00892061	0.0516412	0.0132528	-0.0187734	0.256771	0.225843	0.756827	0.146653	0.583163	0.83006	0.34117	0.913877	0.523721	7.87978e-06	0.000919601	0.6992	0.927943
122	1-stearoyl-2-arachidonoyl-GPI (18:0/20:4)	1656	TRUE	-1.3675	0.0874073	0.0181959	0.215406	0.447761	0.0607882	-0.105615	-0.00623892	-0.0424106	0.0133093	0.0260122	8.39701e-11	0.228542	0.759161	0.096549	0.0012662	0.422079	0.16225	0.93925	0.597756	6.13681e-06	3.7135e-06	0.699965	0.927943
350	glutamate	1656	TRUE	-2.45335	0.0672708	0.0175349	0.417443	0.0305427	0.0470283	-0.150491	-0.0579873	0.15323	0.0233692	0.0484374	2.13138e-33	0.338072	0.760054	0.00087114	0.82019	0.520844	0.0395384	0.464015	0.0487645	2.26612e-16	5.28085e-19	0.743363	0.927943
232	5-HETE	1656	TRUE	-0.94245	0.0529818	0.0182501	0.0304381	0.0655437	0.200408	0.0399183	-0.130929	0.250675	0.00757504	0.0179826	9.54236e-06	0.47024	0.760965	0.81629	0.640622	0.00883154	0.601266	0.113574	0.00203294	0.0108955	0.00155377	0.824796	0.927943
400	isovalerylglycine	1656	TRUE	-1.05482	0.0369418	-0.0181421	0.498644	-0.0279003	-0.17405	-0.254134	-0.270087	-0.159241	0.0122607	0.0228901	6.46576e-07	0.613085	0.761332	0.000132102	0.841806	0.0223691	0.000833469	0.00104418	0.0490079	3.48995e-05	5.21902e-05	0.875397	0.927943
132	1-stearoyl-2-oleoyl-GPC (18:0/18:1)	1656	TRUE	-1.67281	-0.0362085	-0.0178867	0.0869132	0.026703	0.000897298	-0.078784	0.0842431	-0.0599283	0.0222593	0.0213843	1.20088e-15	0.615203	0.761357	0.499231	0.84639	0.990472	0.293463	0.299717	0.452456	2.5247e-14	0.000126581	0.875397	0.927943
587	valine	1656	TRUE	-2.75463	0.0801575	-0.0164617	0.539969	-0.0346088	-0.138728	-0.256936	-0.171956	-0.181384	0.0279691	0.0569828	1.6036e-43	0.242861	0.769261	1.05411e-05	0.792157	0.0526592	0.000323454	0.0263109	0.0170044	9.23745e-24	8.24698e-27	0.707874	0.936058
501	phosphatidylcholine (16:0/22:5n3, 18:1/20:4)*	1656	TRUE	-0.851995	0.0179517	0.0172875	-0.172848	0.129975	0.0228193	-0.00335313	-0.0876412	-0.192702	0.0183634	-0.00208613	5.95374e-05	0.806136	0.772541	0.185733	0.35311	0.764887	0.96488	0.288042	0.0173551	5.97852e-10	0.712703	0.947911	0.938532
395	isobutyrylglycine	1656	TRUE	-1.15517	0.0790411	-0.0170512	0.576379	-0.022499	-0.159829	-0.123653	-0.206227	-0.124318	0.010282	0.0284478	4.65746e-08	0.278071	0.774736	9.44532e-06	0.871818	0.035494	0.103121	0.0120906	0.123398	0.000502058	4.64373e-07	0.714252	0.939272
662	X - 14568	1656	TRUE	0.0240444	0.0244659	0.0173483	0.0612641	-0.106214	-0.0400493	0.0498	-0.0519494	-0.0925225	-0.00328136	0.00641803	0.911366	0.742446	0.775649	0.644922	0.455941	0.606062	0.520546	0.536089	0.261734	0.277072	0.26569	0.918304	0.939272
476	orotate	1656	TRUE	-0.275115	-0.04604	-0.0168577	0.176278	0.0227802	-0.0224103	-0.122154	-0.0459102	-0.0194324	0.00638104	-0.000149224	0.199796	0.533614	0.780419	0.181952	0.872123	0.771444	0.112634	0.582018	0.812438	0.033362	0.979217	0.863358	0.942364
6	1-(1-enyl-palmitoyl)-2-linoleoyl-GPC (P-16:0/18:2)*	1656	TRUE	1.08833	0.0375884	-0.0164764	-0.0504552	-0.515061	0.0704274	-0.00511746	-0.0457358	-0.186174	0.000787737	-0.0428293	2.19137e-07	0.603565	0.780709	0.696275	0.00020039	0.350948	0.945859	0.575292	0.0201932	0.788409	2.17891e-14	0.875397	0.942364
656	X - 13529	1656	TRUE	-2.60279	0.0845044	0.0156215	0.479855	0.0713512	-0.137428	-0.252107	-0.197981	-0.129856	0.0230893	0.0601434	3.37645e-38	0.223532	0.783161	0.000108509	0.591208	0.0577337	0.000486587	0.0114483	0.091187	2.36951e-16	4.81173e-29	0.697494	0.943809
528	salicylate	1656	TRUE	0.252286	-0.0427335	0.0165492	0.0392871	0.138854	-0.14309	-0.116088	-0.0910352	-0.181933	0.00257689	-0.0108801	0.24082	0.564336	0.784839	0.766642	0.327685	0.0642658	0.132561	0.276215	0.0266774	0.39134	0.058109	0.871418	0.944318
266	benzoate	1656	TRUE	-0.290102	0.0155807	-0.0163076	0.156248	-0.000650512	0.0458449	0.082143	0.0040774	0.0133878	0.00393503	0.00218907	0.178968	0.834127	0.788643	0.239569	0.996354	0.55471	0.288928	0.961242	0.870911	0.192133	0.704031	0.947911	0.946552
653	X - 12846	1656	TRUE	-1.51949	0.155476	-0.0157553	0.730656	0.229716	0.0294495	-0.0554336	0.0569914	0.034482	0.0127391	0.0317034	4.24223e-13	0.0314358	0.789731	1.49296e-08	0.0966628	0.696024	0.461221	0.48434	0.66652	1.37727e-05	1.47384e-08	0.449535	0.946552
4	1-(1-enyl-palmitoyl)-2-docosahexaenoyl-GPC (P-16:0/22:6)*	1656	TRUE	-1.33271	0.105664	0.0153341	0.110176	-0.22245	-0.0197113	-0.0413821	-0.125112	-0.136357	0.0364736	-0.0194213	8.15046e-11	0.135003	0.790786	0.382785	0.100092	0.789236	0.573934	0.116575	0.0815252	4.37733e-37	0.000389516	0.608414	0.946552
342	gamma-glutamylphenylalanine	1656	TRUE	-2.50351	0.0348904	0.0150281	0.483109	-0.0215685	-0.14863	-0.186439	-0.243217	-0.149335	0.0308396	0.0411088	4.15738e-35	0.617168	0.792295	0.00010613	0.871711	0.041209	0.0102974	0.00200246	0.05334	1.20259e-27	2.86251e-14	0.875397	0.946552
439	N6-carboxymethyllysine	1656	TRUE	-1.37857	0.129291	-0.0154243	0.231871	-0.123149	-0.0751289	-0.16142	-0.0956205	-0.103545	0.0218762	0.0127874	5.02209e-11	0.0738177	0.794207	0.0725727	0.373531	0.319293	0.0320379	0.241026	0.196011	8.66861e-14	0.0224315	0.523809	0.946552
737	X - 23782	1656	TRUE	-1.33009	0.0389278	0.0152721	0.0172951	-0.067498	-0.157247	-0.0903248	-0.137247	0.0530126	0.0311586	-0.00799759	1.74665e-10	0.587881	0.794845	0.892745	0.623395	0.0358541	0.22713	0.0902255	0.505113	1.05232e-26	0.150578	0.873003	0.946552
609	X - 11444	1656	TRUE	-1.8348	0.0650524	0.0151837	0.899686	0.164402	0.0684708	-0.0251616	0.00767486	-0.00899338	0.0149854	0.0393872	1.08621e-18	0.363956	0.795507	2.04336e-12	0.230523	0.359624	0.735896	0.924333	0.909756	2.50331e-07	1.27288e-12	0.758157	0.946552
479	oxalate (ethanedioate)	1656	TRUE	-0.717181	-0.089125	-0.0152582	-0.301714	-0.214062	0.0356773	0.0213402	0.141311	-0.0644027	0.0204101	-0.0125723	0.000684877	0.220862	0.797686	0.0202892	0.124383	0.638481	0.778275	0.0852089	0.424336	4.71292e-12	0.0257621	0.697494	0.947645
148	2'-deoxyuridine	1656	TRUE	0.789989	0.000905042	-0.015245	0.153187	-0.0606824	-0.0123712	-0.0384551	0.0355349	0.0774015	-0.00834398	-0.0146998	0.000232911	0.99024	0.801027	0.246243	0.668195	0.872642	0.617599	0.670183	0.344767	0.0054149	0.0103075	0.997941	0.947645
175	2-pyrrolidinone	1656	TRUE	0.209469	-0.0679928	-0.0145753	-0.0527308	-0.0231251	-0.146931	0.428785	-0.446925	0.140816	-0.00265302	-0.00312877	0.310911	0.339948	0.802439	0.678542	0.865316	0.048047	7.44869e-09	2.66552e-08	0.0742913	0.358486	0.570733	0.745309	0.947645
646	X - 12688	1656	TRUE	-0.398903	-0.0121236	-0.0149785	0.0570152	-0.0279982	0.00167115	0.041341	0.0968343	0.0496659	0.00687117	0.00064258	0.0623451	0.86946	0.803873	0.665137	0.842776	0.982673	0.590372	0.244427	0.543177	0.0216162	0.910452	0.958537	0.947645
279	carnitine	1656	TRUE	-2.12228	0.0852041	0.0143185	0.451605	0.351381	0.104224	0.072409	0.0193968	-0.0476737	0.0245835	0.0307092	1.17835e-24	0.232501	0.806149	0.000394208	0.0100779	0.161478	0.329753	0.809541	0.546308	1.97326e-17	2.75842e-08	0.703059	0.947645
693	X - 17351	1656	TRUE	-1.06794	-0.0318576	0.0144352	0.0152687	0.00337615	-0.0739593	-0.0803165	0.0701479	-0.021483	0.0171153	0.00841686	5.13851e-07	0.663885	0.809689	0.907147	0.980799	0.333461	0.292646	0.396168	0.791285	8.5387e-09	0.138236	0.890832	0.947645
140	2-aminoadipate	1656	TRUE	-2.21956	0.0880374	-0.0134919	1.2368	0.0785031	-0.101025	-0.173576	-0.212587	-0.237164	0.025365	0.0396335	6.65145e-29	0.199195	0.809833	5.48437e-24	0.54966	0.157836	0.0150415	0.00597702	0.0017877	7.36448e-20	8.48331e-14	0.697494	0.947645
723	X - 22771	1656	TRUE	1.08583	0.0155584	-0.0143546	0.0417262	0.0423457	0.136354	0.24789	0.128545	0.00584661	-0.0124793	-0.0220661	3.47916e-07	0.832246	0.811085	0.750379	0.763197	0.0751232	0.00118794	0.120691	0.942693	2.79001e-05	0.000104921	0.947911	0.947645
253	alpha-tocopherol	1656	TRUE	0.0955203	-0.0948008	0.0142683	0.0100454	-0.136514	0.196427	-0.0549047	0.295354	-0.0505646	0.00567131	-0.0178331	0.655566	0.199026	0.813105	0.939248	0.33379	0.0107354	0.474928	0.000387901	0.536147	0.0581185	0.00181208	0.697494	0.947645
706	X - 21365	1656	TRUE	-0.943649	-0.108242	0.0140572	0.0299145	0.487133	-0.0281269	-0.00779806	0.0623524	-0.1347	0.015969	0.00573963	8.35611e-06	0.138111	0.813794	0.818477	0.000487545	0.711826	0.918269	0.44878	0.0956153	6.84994e-08	0.309991	0.608414	0.947645
181	3-aminoisobutyrate	1656	TRUE	-0.613006	0.122868	-0.0139292	0.405218	-0.00995596	-0.0444253	-0.0529519	-0.0908935	-0.0380836	0.019083	-0.0135844	0.00364691	0.0909204	0.814669	0.00179396	0.94293	0.557874	0.484035	0.26744	0.636056	9.46855e-11	0.0158081	0.550651	0.947645
602	X - 11372	1656	TRUE	0.683658	-0.0263606	-0.0138461	0.237812	0.18797	-0.132177	-0.119037	-0.00993713	-0.045159	-0.0208005	0.0174508	0.00120686	0.717247	0.816035	0.0673078	0.177177	0.0817164	0.116231	0.903648	0.575294	1.82656e-12	0.00196547	0.912639	0.947645
267	beta-alanine	1656	TRUE	-0.727521	0.0833596	0.0139194	0.231627	0.00165655	-0.0221268	-0.191042	-0.0987096	-0.190333	-0.00180213	0.0352778	0.000627815	0.255679	0.816431	0.0769334	0.990582	0.772391	0.0123425	0.232663	0.0190878	0.544511	5.26612e-10	0.714252	0.947645
495	phenylalanylphenylalanine	1656	TRUE	-1.52263	0.0884668	-0.0137587	0.182641	-0.037564	-0.0730176	-0.0876842	-0.057017	0.00375854	0.011903	0.0369398	5.10521e-13	0.223428	0.816864	0.159252	0.787042	0.335377	0.246423	0.486562	0.962743	5.35248e-05	5.24761e-11	0.697494	0.947645
179	3-(4-hydroxyphenyl)lactate	1656	TRUE	-2.14203	0.0777237	-0.0131722	0.808784	0.124357	-0.0880958	-0.112268	-0.0740117	-0.13196	0.0188181	0.0478435	7.71657e-26	0.268521	0.818598	1.13342e-10	0.354878	0.229241	0.124737	0.35015	0.0897839	3.93261e-11	1.4419e-18	0.714252	0.947645
336	gamma-glutamylglutamine	1656	TRUE	-0.594623	0.0464057	0.0135731	0.500998	-0.186054	-0.0251471	-0.154394	-0.0981999	-0.0737768	0.0204622	-0.0159288	0.00502787	0.525323	0.820255	0.000122936	0.183253	0.741421	0.0423732	0.233321	0.361801	4.95493e-12	0.00487793	0.862539	0.947645
725	X - 22816	1656	TRUE	-1.03692	-0.0365688	-0.0134205	0.15907	-0.232756	-0.208	-0.133867	-0.03645	-0.0867754	0.0268864	-0.00898693	7.54501e-07	0.612758	0.820281	0.217588	0.0922697	0.00578133	0.0751213	0.654617	0.278076	4.42688e-20	0.108268	0.875397	0.947645
750	X - 24425	1656	TRUE	-0.968043	0.108149	0.0136327	0.164576	-0.109324	-0.223638	-0.168436	-0.191298	-0.0485965	0.0152452	0.0117574	5.51278e-06	0.140777	0.82036	0.209395	0.436514	0.00350092	0.0275628	0.0208738	0.550033	3.04958e-07	0.038687	0.608414	0.947645
15	1-(1-enyl-stearoyl)-2-docosahexaenoyl-GPC (P-18:0/22:6)*	1656	TRUE	-0.471209	0.137141	0.0130884	0.02921	-0.243962	0.0539316	-0.00310535	-0.0446257	-0.156142	0.030803	-0.0432277	0.0214594	0.0521491	0.820678	0.816824	0.0710301	0.464098	0.96631	0.575255	0.0458575	5.52647e-27	2.71792e-15	0.492897	0.947645
94	1-palmitoyl-2-arachidonoyl-GPE (16:0/20:4)*	1656	TRUE	-0.894128	0.144966	0.0135408	-0.3566	-0.00913035	0.0381212	0.00561661	0.0568684	-0.0598457	0.0113876	0.0111088	2.72381e-05	0.0484449	0.821628	0.00655605	0.94821	0.61883	0.941454	0.492412	0.461889	0.000131823	0.0508708	0.492897	0.947645
437	N6-acetyllysine	1656	TRUE	-1.4805	0.0155435	-0.0133134	0.203815	0.1356	-0.0726141	-0.18975	-0.0913701	-0.07878	0.0181614	0.0247413	2.75051e-12	0.831396	0.823502	0.117942	0.331712	0.340309	0.0125393	0.26708	0.329791	8.5174e-10	1.21018e-05	0.947911	0.948352
195	3-methyl catechol sulfate (1)	1656	TRUE	-0.534833	0.126656	0.0132347	0.154916	0.0384264	0.0408666	-0.0234192	-0.0796322	-0.133673	0.01276	-0.00415783	0.0125101	0.0861875	0.826424	0.239865	0.785583	0.595582	0.760555	0.338755	0.101957	2.01646e-05	0.467051	0.544647	0.94874
530	serine	1656	TRUE	-0.372563	0.0614333	0.0131912	0.0619476	-0.175775	-0.0925395	-0.197744	-0.00168419	-0.0635321	0.0121528	-0.00694098	0.0811156	0.404031	0.826539	0.637485	0.212137	0.228194	0.00988097	0.983816	0.435788	4.68462e-05	0.223493	0.779054	0.94874
605	X - 11438	1656	TRUE	-1.18134	0.14801	-0.0129039	0.0873211	-0.0979486	-0.0679133	-0.0332424	-0.124662	0.0644204	0.0255647	-0.00432522	1.9322e-08	0.0411409	0.827624	0.499867	0.480042	0.369029	0.659538	0.127217	0.422158	3.36407e-18	0.440999	0.460692	0.94874
582	undecanedioate	1656	TRUE	-0.37726	0.0146732	-0.0129445	0.0933839	-0.0748431	-0.275913	-0.218927	-0.17381	-0.106586	0.00982541	0.0015117	0.0797863	0.843288	0.831091	0.481067	0.598224	0.000365589	0.00460869	0.0378478	0.194678	0.00109633	0.792574	0.947911	0.951264
688	X - 17179	1656	TRUE	-0.678611	0.0417844	0.0127559	-0.112224	0.144725	0.0893271	0.0669183	-0.157136	0.0839453	0.00206281	0.0209825	0.00152751	0.571271	0.832576	0.394442	0.305447	0.245894	0.383771	0.0590184	0.304309	0.490627	0.000241644	0.871549	0.951515
519	pyroglutamylglutamine	1656	TRUE	-1.19354	0.042084	-0.012563	-0.180843	-0.239318	-0.0694081	-0.148836	0.0830167	0.0715872	0.0132675	0.0215195	1.9758e-08	0.56576	0.833913	0.166948	0.087872	0.363848	0.0510605	0.315094	0.377637	8.00333e-06	0.000149586	0.871549	0.951597
158	2-hydroxyphenylacetate	1656	TRUE	-0.926972	0.109423	0.0122357	0.440315	0.0446607	-0.0441021	-0.0911777	-0.0961192	-0.117475	0.00635671	0.0251973	1.36201e-05	0.136298	0.838557	0.000787648	0.750675	0.564876	0.233126	0.24589	0.148639	0.0328228	9.4556e-06	0.608414	0.954352
665	X - 15245	1656	TRUE	-0.170994	0.00706611	0.012228	-0.065375	0.155421	-0.114121	-0.11674	-0.0177877	-0.343297	0.000283102	0.0106901	0.422929	0.923462	0.838865	0.618635	0.26945	0.136871	0.127352	0.830189	2.49435e-05	0.924374	0.0605629	0.977311	0.954352
720	X - 22162	1656	TRUE	-1.35771	0.0538806	-0.0120006	0.357189	-0.0981846	0.0524608	0.0596854	0.0416639	0.098641	0.0191817	0.012005	1.35206e-10	0.459722	0.840392	0.00605677	0.481407	0.490141	0.431492	0.612203	0.221589	8.54263e-11	0.0334334	0.820246	0.954644
3	1-(1-enyl-palmitoyl)-2-arachidonoyl-GPE (P-16:0/20:4)*	1656	TRUE	-1.18243	0.0434113	-0.0119431	0.179724	-0.135649	-0.0417639	-0.0519694	-0.110173	-0.205368	0.0139532	0.0207223	2.72998e-08	0.55385	0.842107	0.169891	0.333685	0.585062	0.496033	0.182771	0.0114317	2.69807e-06	0.000263566	0.864295	0.95506
734	X - 23644	1656	TRUE	0.261055	-0.0924267	0.0117987	0.196957	-0.282879	-0.0534969	-0.0550194	-0.140561	-0.158374	-0.00040645	-0.00583063	0.224639	0.21229	0.845596	0.136622	0.0460465	0.488867	0.47573	0.0925633	0.0535895	0.8924	0.309659	0.697494	0.95506
164	2-methylbutyrylcarnitine (C5)	1656	TRUE	-2.51802	0.097011	0.011121	0.743143	0.0731326	-0.0474625	-0.0363619	-0.113454	-0.0755687	0.030687	0.0374306	2.25768e-35	0.165344	0.845773	2.65563e-09	0.584688	0.515238	0.61744	0.150232	0.329085	2.69488e-27	4.8e-12	0.641242	0.95506
358	glycerophosphoinositol*	1656	TRUE	0.0160282	0.079019	-0.0117009	-0.427466	0.250191	0.114322	0.175408	0.124608	0.138288	0.00168329	-0.0088325	0.940168	0.283014	0.845838	0.00114428	0.0756705	0.136476	0.0220728	0.133298	0.0897441	0.572759	0.121284	0.719008	0.95506
660	X - 14056	1656	TRUE	-0.430209	0.0349011	-0.0114667	0.190564	0.230177	0.0353104	0.0285635	0.109824	-0.0869397	-0.00182526	0.0193357	0.0446684	0.636528	0.849394	0.148463	0.103375	0.646702	0.710274	0.187304	0.287743	0.542208	0.000724027	0.882583	0.957291
618	X - 11564	1656	TRUE	-3.16326	0.078083	0.01044	0.528668	0.206768	-0.0436009	0.0458707	-0.114958	-0.00761852	0.0350404	0.0528746	1.4635e-57	0.252111	0.851441	1.40957e-05	0.113002	0.539829	0.518126	0.134883	0.91962	8.21129e-37	1.33532e-23	0.714252	0.957291
313	dimethylglycine	1656	TRUE	-0.807566	0.0676147	0.0113124	0.430091	0.0507659	0.216495	0.0504742	0.0649307	0.132862	0.00493762	0.0169901	0.000168661	0.360824	0.85167	0.00113328	0.719936	0.00503187	0.512319	0.43649	0.104891	0.0998338	0.00302952	0.756569	0.957291
311	dihydroorotate	1656	TRUE	-0.828506	-0.0375235	-0.011053	0.875132	0.0903303	-0.0435676	-0.1151	-0.0473342	-0.0207924	0.00793762	0.0170947	8.97712e-05	0.606798	0.852905	1.79493e-11	0.517342	0.56674	0.129431	0.564832	0.796761	0.00725706	0.00246771	0.875397	0.957291
623	X - 11850	1656	TRUE	-0.0177081	0.0616271	-0.0109211	-0.276242	-0.150374	-0.00322537	0.0114329	0.0354173	-0.0432579	0.0107688	-0.0206731	0.933847	0.401981	0.855858	0.0353924	0.285207	0.966458	0.881281	0.669306	0.595231	0.000304291	0.000283441	0.778469	0.957293
593	X - 07765	1656	TRUE	0.30499	-0.0409798	-0.0107667	0.0387343	-0.0760095	0.0533291	0.0954269	0.0177665	-0.0814147	-0.00733311	0.00224338	0.156256	0.58048	0.859038	0.769863	0.592152	0.490496	0.216378	0.831738	0.321386	0.0147284	0.696054	0.871549	0.957293
391	indolelactate	1656	TRUE	-1.03727	0.139517	-0.0105613	0.591742	0.103907	-0.0782537	-0.0653424	-0.127227	-0.150168	0.0120289	0.0181165	9.54074e-07	0.0558166	0.859458	5.5571e-06	0.456667	0.303779	0.389593	0.121991	0.0630298	4.77533e-05	0.00134393	0.492897	0.957293
681	X - 16946	1656	TRUE	0.795157	-0.131581	0.0106377	0.301476	0.0108805	0.0248559	-0.0422911	0.0236004	-0.077223	0.000723215	-0.0316888	0.000196337	0.0738237	0.859691	0.0218003	0.938422	0.746127	0.581009	0.776159	0.343379	0.808533	2.71435e-08	0.523809	0.957293
237	5-methyluridine (ribothymidine)	1656	TRUE	0.113161	-0.0658263	-0.0105853	0.385112	-0.00652471	-0.0135803	-0.0253049	-0.0238336	-0.0713204	0.00953463	-0.0227102	0.595788	0.370654	0.860235	0.00335533	0.963013	0.859459	0.740968	0.773784	0.381045	0.00138439	6.6656e-05	0.765747	0.957293
492	phenylacetylglutamine	1656	TRUE	-1.11593	0.0494346	0.0105401	-0.168937	-0.0927438	0.105202	0.106591	0.178206	0.0462775	0.0191399	0.00174933	1.59024e-07	0.50051	0.860545	0.197292	0.50893	0.169305	0.16293	0.031279	0.568984	1.25486e-10	0.758228	0.847711	0.957293
455	N-acetylputrescine	1656	TRUE	-1.1264	0.112541	0.0102371	0.023599	-0.0242837	-0.0678497	0.0539718	-0.0633566	0.000155002	0.0183523	0.00683881	1.03831e-07	0.123056	0.863782	0.856298	0.861953	0.372777	0.477483	0.441415	0.99847	5.59133e-10	0.226312	0.608414	0.959474
637	X - 12411	1656	TRUE	-1.48459	0.0491331	0.00996625	0.207317	0.169179	0.0416157	-0.127086	-0.0625423	-0.0396802	0.0237473	0.0111507	1.58805e-12	0.497445	0.866322	0.10886	0.222108	0.581662	0.0918386	0.443752	0.62069	6.08909e-16	0.0467856	0.845355	0.959604
308	diglycerol	1656	TRUE	-0.759746	0.0699533	-0.0100999	-0.136232	0.0363515	-0.0354869	0.0027803	-0.0140101	-0.0890289	0.00513726	0.0202835	0.000391607	0.343558	0.867169	0.301606	0.797011	0.645059	0.971155	0.866418	0.276319	0.0862752	0.000391119	0.746643	0.959604
225	5alpha-androstan-3alpha,17beta-diol monosulfate (1)	1656	TRUE	-0.191199	-0.00444597	0.00981572	0.467271	0.145273	0.0380719	0.0897466	0.070049	0.0792952	-0.0177336	0.0400461	0.360587	0.950819	0.867727	0.00028316	0.292251	0.612618	0.231733	0.388847	0.320495	1.30325e-09	7.33547e-13	0.988957	0.959604
494	phenylalanylleucine	1656	TRUE	-0.512437	0.0184819	-0.00974342	0.0106898	-0.0626903	-0.166019	-0.147219	-0.0532008	-0.0619927	6.48494e-05	0.0236511	0.0167263	0.802306	0.871754	0.935366	0.657185	0.0310799	0.0554145	0.522784	0.44821	0.982716	3.52274e-05	0.947911	0.96045
572	thymol sulfate	1656	TRUE	0.657345	0.0794609	0.00966609	-0.105025	0.185152	-0.0203817	0.181603	0.0381398	-0.109387	-0.0127352	-0.00134109	0.00197892	0.27798	0.871772	0.421971	0.18649	0.789645	0.0172387	0.644267	0.177428	1.8036e-05	0.813116	0.714252	0.96045
640	X - 12462	1656	TRUE	0.161185	-0.0572321	0.00967289	0.0723869	0.207049	0.134906	0.243957	-0.043456	-0.0734146	-0.000374444	-0.00849057	0.450433	0.436895	0.872323	0.581857	0.141608	0.0789402	0.0014567	0.600659	0.367785	0.900176	0.136439	0.804116	0.96045
130	1-stearoyl-2-linoleoyl-GPI (18:0/18:2)	1656	TRUE	0.451507	0.0148001	-0.00937205	-0.0845464	-0.109301	-0.0716796	-0.0659725	-0.0908897	-0.119424	-0.00421711	-0.00604557	0.0352396	0.84129	0.876752	0.521776	0.439624	0.352501	0.391234	0.275514	0.144506	0.159398	0.290914	0.947911	0.963914
344	gamma-glutamyltyrosine	1656	TRUE	-2.85736	0.0209624	0.00841714	0.387133	-0.01606	-0.0386688	-0.210126	-0.153155	0.0250161	0.036403	0.0412745	1.08961e-46	0.760064	0.880779	0.00158553	0.902682	0.589139	0.00327688	0.0478641	0.742052	4.33835e-39	8.22734e-15	0.929379	0.964124
630	X - 12101	1656	TRUE	-0.353144	0.0231287	0.00905548	-0.0387516	0.0192944	-0.0715383	0.0590248	-0.0680655	-0.0242326	0.00893791	-0.00360237	0.100432	0.754929	0.881179	0.769608	0.891756	0.354656	0.44417	0.415315	0.767724	0.00293179	0.530177	0.928853	0.964124
407	leucylalanine	1656	TRUE	0.242353	0.0244565	0.00903061	-0.17794	0.177101	0.154725	0.146261	-0.0174865	0.0079995	-0.00296614	-0.00665374	0.259282	0.741194	0.881429	0.178391	0.211347	0.0451604	0.0577957	0.834135	0.922281	0.323231	0.245975	0.918304	0.964124
326	erythronate*	1656	TRUE	-1.48026	0.0105654	-0.00876283	-0.0697361	-0.0977245	0.0453289	-0.149491	-0.103785	0.116114	0.0262894	0.00610082	1.64083e-12	0.883733	0.882071	0.588816	0.479644	0.547514	0.0468668	0.202725	0.146662	2.86667e-19	0.275581	0.961747	0.964124
95	1-palmitoyl-2-arachidonoyl-GPI (16:0/20:4)*	1656	TRUE	-2.08012	-0.0294924	0.00842785	0.191278	0.197708	-0.0267826	-0.139067	-0.0477342	-0.0883884	0.0191728	0.0448505	9.44577e-24	0.679395	0.885147	0.133326	0.147652	0.71899	0.0612196	0.553076	0.263313	3.45121e-11	4.85481e-16	0.894755	0.964916
504	pipecolate	1656	TRUE	-0.49358	0.115925	0.00860342	0.358357	-0.0102445	0.0380922	-0.00976492	0.0309745	-0.0891545	0.0191185	-0.0200504	0.0197529	0.112208	0.885362	0.00596443	0.941524	0.616822	0.897741	0.70667	0.269949	1.0464e-10	0.000389495	0.603062	0.964916
37	1-adrenoyl-GPC (22:4)*	1656	TRUE	-0.285507	-0.180572	0.00857552	-0.179334	0.108784	0.0423163	0.0745607	0.0636784	0.0097367	0.00105424	0.0080832	0.182321	0.0143997	0.886969	0.173498	0.441043	0.582469	0.331755	0.44413	0.905144	0.724584	0.157245	0.44522	0.965269
371	guanidinosuccinate	1656	TRUE	-0.66293	-0.0301443	-0.00817406	-0.14722	-0.07744	0.115067	0.0820561	0.134758	0.0656377	0.0275299	-0.0320711	0.00149215	0.675204	0.889476	0.251783	0.573748	0.125181	0.273253	0.0967094	0.409957	3.82729e-21	8.61431e-09	0.893933	0.966598
14	1-(1-enyl-stearoyl)-2-arachidonoyl-GPE (P-18:0/20:4)*	1656	TRUE	-0.824295	0.112928	-0.0082176	0.0934435	-0.143852	-0.0330363	-0.042766	-0.119845	-0.196424	0.0146994	0.00469255	0.000112418	0.124769	0.89133	0.476873	0.306833	0.666819	0.576576	0.148577	0.0158957	8.32225e-07	0.410169	0.608414	0.966684
541	sphingomyelin (d18:1/24:1, d18:2/24:0)*	1656	TRUE	-1.03087	-0.0807749	-0.00809904	-0.022274	-0.159552	-0.027958	-0.0998643	0.24644	-0.0671871	0.020416	0.000139851	1.25663e-06	0.27057	0.892524	0.864899	0.255415	0.714674	0.190744	0.00287613	0.407891	6.53754e-12	0.980351	0.714252	0.966684
282	chenodeoxycholate	1656	TRUE	-1.07262	0.000679098	-0.00804774	0.379713	0.267372	0.0568328	-0.0979048	-0.143225	-0.0498854	0.013627	0.0155282	4.83466e-07	0.992624	0.893411	0.00379519	0.0571633	0.458278	0.200488	0.0838333	0.539699	4.76943e-06	0.00634742	0.997941	0.966684
566	theanine	1656	TRUE	-0.714894	-0.0409035	0.00763481	0.0312809	0.0150439	-0.163139	-0.108806	-0.142616	-0.160933	0.0146588	0.00345653	0.000827058	0.578876	0.899172	0.81211	0.915044	0.033821	0.156146	0.0861614	0.0485965	9.32698e-07	0.544791	0.871549	0.96964
194	3-methoxytyrosine	1656	TRUE	-0.98829	0.162511	-0.00753814	0.007885	-0.146844	-0.0207354	-0.0531246	0.0315402	0.00480071	0.0234006	-0.00848024	3.25647e-06	0.026401	0.899763	0.951894	0.29444	0.785939	0.485702	0.702384	0.952767	3.16272e-15	0.134673	0.44522	0.96964
678	X - 16935	1656	TRUE	0.31109	-0.0444365	0.00748982	-0.0431211	0.129213	0.0868308	0.0462631	0.133961	0.18056	-0.0154711	0.0155827	0.145977	0.54683	0.90115	0.74334	0.359886	0.259024	0.546819	0.107254	0.0270376	2.30022e-07	0.00637092	0.864295	0.96964
673	X - 16123	1656	TRUE	-0.577855	0.0139341	-0.00743874	-0.125249	0.170226	0.10658	0.0557911	-0.207744	0.0286969	0.000346708	0.0213658	0.00674668	0.84968	0.901515	0.34006	0.226286	0.164599	0.466059	0.0122237	0.724464	0.907417	0.000175263	0.953387	0.96964
696	X - 18901	1656	TRUE	0.290747	0.0439775	-0.00737582	0.0528201	-0.17513	-0.0586481	-0.0363467	0.0497928	-0.109787	0.00766699	-0.0253814	0.173952	0.550744	0.90259	0.688186	0.214355	0.445578	0.635742	0.549153	0.178578	0.0103108	8.74328e-06	0.864295	0.96964
13	1-(1-enyl-stearoyl)-2-arachidonoyl-GPC (P-18:0/20:4)	1656	TRUE	0.343742	0.0912666	0.00723455	0.0843501	-0.210897	-0.0286028	-0.164311	-0.194584	-0.20755	0.00576459	-0.0211653	0.107573	0.215133	0.904343	0.521146	0.134418	0.709573	0.0320647	0.0191037	0.010904	0.0535041	0.000205923	0.697494	0.970137
17	1-(1-enyl-stearoyl)-2-oleoyl-GPC (P-18:0/18:1)	1656	TRUE	0.762199	0.07281	0.0068218	-0.108852	-0.417694	0.0387665	-0.0318177	0.121729	-0.136032	0.0125846	-0.0549481	0.000229527	0.307243	0.906858	0.392639	0.00220583	0.602249	0.66823	0.130105	0.0849368	1.34823e-05	2.5476e-23	0.722863	0.970233
443	N-acetyl-beta-alanine	1656	TRUE	-0.580994	-0.0342092	0.00689563	0.373095	0.0434543	0.278249	0.139388	0.0702572	0.142624	0.00562626	0.00571593	0.00638822	0.641307	0.908561	0.00443526	0.757126	0.000280442	0.0682526	0.396204	0.0794178	0.0588184	0.31487	0.882862	0.970233
244	acetylcarnitine (C2)	1656	TRUE	-2.204	0.0547741	-0.00659321	0.385054	-0.153664	-0.130491	-0.090785	-0.0970654	0.0695765	0.0318747	0.0239952	6.99502e-27	0.438935	0.909279	0.00231053	0.256483	0.0771037	0.217862	0.223889	0.374602	1.15114e-28	1.19817e-05	0.804116	0.970233
485	palmitoylcarnitine (C16)	1656	TRUE	-2.3228	0.000320634	-0.00648941	0.505583	-0.205082	-0.0881754	-0.169137	0.0209287	0.0207729	0.0306157	0.0310185	4.24038e-30	0.996358	0.910029	5.55074e-05	0.127039	0.228774	0.0207195	0.791609	0.789399	5.95593e-27	1.18354e-08	0.997941	0.970233
75	1-myristoyl-2-palmitoyl-GPC (14:0/16:0)	1656	TRUE	-1.42627	-0.0618373	-0.00653712	-0.221047	-0.210096	-0.045957	-0.165166	-0.130409	-0.232394	0.025261	0.0105065	9.06237e-12	0.390923	0.911673	0.0858867	0.127679	0.541017	0.0277262	0.108626	0.00359318	5.46583e-18	0.0598205	0.778469	0.970233
438	N6-carbamoylthreonyladenosine	1656	TRUE	-1.9299	0.0607233	-0.00649684	0.16733	0.132034	-0.0191214	-0.0223509	-0.0254368	0.0820892	0.0154373	0.0440683	2.62054e-20	0.399292	0.912174	0.193348	0.338177	0.799145	0.765699	0.75421	0.303461	1.26076e-07	2.83293e-15	0.778469	0.970233
520	pyroglutamylglycine	1656	TRUE	-1.2463	0.0455155	-0.0064665	0.262862	-0.138299	-0.129543	-0.0977386	0.0277634	-0.0139005	0.00923077	0.0319413	3.90306e-09	0.5327	0.913671	0.0436109	0.321845	0.0886982	0.198143	0.735773	0.863381	0.00180644	1.57641e-08	0.863358	0.970453
281	C-glycosyltryptophan	1656	TRUE	-2.56164	0.0362392	0.00599295	0.0212419	0.132962	0.11414	-0.0106266	0.127185	0.0869878	0.026925	0.0434621	7.04547e-36	0.607789	0.917323	0.86621	0.32508	0.121211	0.885059	0.110214	0.265894	5.2592e-21	1.90418e-15	0.875397	0.97183
280	catechol sulfate	1656	TRUE	-0.233835	0.125192	0.00621836	0.292605	-0.281758	-0.11146	-0.134074	-0.141601	-0.169466	0.014166	-0.0154688	0.272635	0.0883857	0.917552	0.0257242	0.0450557	0.145836	0.0796254	0.0874453	0.0372458	1.98461e-06	0.00655831	0.550651	0.97183
58	1-linoleoyl-2-arachidonoyl-GPC (18:2/20:4)*	1656	TRUE	0.255413	0.035062	0.0060882	-0.0835895	-0.0976267	-0.0672376	-0.172396	-0.108271	-0.217086	3.94231e-05	-0.00603307	0.234311	0.635732	0.919871	0.527119	0.490668	0.38385	0.0252796	0.194618	0.00808375	0.989521	0.292636	0.882583	0.972916
247	alanine	1656	TRUE	-1.66045	0.117103	-0.00573725	0.094842	0.200734	-0.161131	-0.178289	-0.12263	-0.225067	0.0124597	0.0445337	1.88937e-15	0.103882	0.922367	0.460734	0.14515	0.0319268	0.0173891	0.130993	0.00476028	1.9779e-05	1.39826e-15	0.584169	0.973109
607	X - 11441	1656	TRUE	0.943286	-0.197024	-0.00570432	0.12546	0.116399	0.108026	0.0617824	-0.03097	-0.0202498	-0.0022063	-0.0328425	9.53592e-06	0.0072976	0.924311	0.338688	0.407481	0.158466	0.419022	0.70843	0.80334	0.458739	7.72082e-09	0.361071	0.973109
104	1-palmitoyl-2-linoleoyl-GPI (16:0/18:2)	1656	TRUE	-1.12379	-0.0366532	0.0056378	-0.105334	-0.0239857	-0.0693049	-0.113245	-0.0395719	-0.117989	0.00614564	0.0348263	1.11199e-07	0.615515	0.924728	0.41894	0.863635	0.362626	0.136108	0.63066	0.144288	0.0378345	7.21827e-10	0.875397	0.973109
364	glycodeoxycholate	1656	TRUE	0.382941	-0.00170892	0.00569034	-0.307537	0.0704372	-0.116764	-0.12906	-0.128753	-0.195105	-0.00182249	-0.0064815	0.0757451	0.981656	0.925394	0.0204884	0.620409	0.132033	0.0953232	0.124504	0.0177542	0.545363	0.260171	0.997941	0.973109
559	tartronate (hydroxymalonate)	1656	TRUE	0.160917	-0.135509	-0.00546639	-0.0508717	-0.308288	0.0307254	0.0218359	-0.0413016	-0.0476098	0.012813	-0.0308933	0.448588	0.0641197	0.927221	0.69711	0.0277293	0.687366	0.774454	0.616821	0.556922	1.58138e-05	5.0482e-08	0.518474	0.973109
286	choline phosphate	1656	TRUE	0.241504	0.05183	-0.00539406	-0.404136	-0.0456468	-0.0298445	0.0791726	0.110753	0.00345871	0.0025693	-0.0154245	0.260568	0.48361	0.92895	0.00222161	0.747144	0.69898	0.304027	0.184396	0.966326	0.391792	0.00710938	0.83731	0.973109
709	X - 21448	1656	TRUE	0.664796	-0.0638374	0.00514469	0.306929	0.0186897	0.12658	0.0309197	-0.00358167	0.034231	0.00232957	-0.0323767	0.00185572	0.38589	0.93189	0.0195583	0.894458	0.0992932	0.686649	0.96559	0.67456	0.435192	1.36179e-08	0.773838	0.973109
348	glucose	1656	TRUE	-1.16976	-0.000310108	-0.00498662	-0.0150643	0.175124	0.0814096	0.0431933	-0.00938879	-0.0247143	0.00224502	0.0402593	3.43863e-08	0.996614	0.933485	0.908091	0.210429	0.285511	0.570201	0.909294	0.760039	0.448665	1.13242e-12	0.997941	0.973109
622	X - 11843	1656	TRUE	-0.245247	0.0445151	0.00497317	-0.314647	-0.106078	0.0886753	-0.0185509	0.0671088	0.0501732	0.00997267	-0.0115858	0.252035	0.546384	0.934313	0.0169559	0.452556	0.249352	0.809206	0.420043	0.539232	0.000860658	0.0426625	0.864295	0.973109
57	1-linolenoyl-GPC (18:3)*	1656	TRUE	-0.27064	-0.0515343	-0.00497242	-0.0422225	-0.0566632	-0.0499936	-0.0504973	-0.0131531	-0.0720351	0.0065044	-0.000821228	0.207129	0.485861	0.934454	0.749149	0.688829	0.516894	0.511863	0.874673	0.378998	0.0300668	0.885981	0.83731	0.973109
412	linoleoylcarnitine (C18:2)*	1656	TRUE	-1.05724	-0.00128037	0.00480863	0.713398	-0.14043	-0.0662147	-0.233621	0.045693	-0.0720269	0.0162462	0.0108278	4.79986e-07	0.985888	0.935245	3.40651e-08	0.310671	0.380523	0.00193507	0.57566	0.368868	3.11571e-08	0.0534411	0.997941	0.973109
416	malonate	1656	TRUE	-0.860863	-0.0259867	-0.00482945	0.0297308	-0.039066	-0.242889	-0.0505083	-0.276865	0.015293	0.0125583	0.0132305	4.90479e-05	0.722153	0.935583	0.819783	0.779975	0.00144158	0.506788	0.000781303	0.850109	2.25784e-05	0.0194149	0.915411	0.973109
548	stachydrine	1656	TRUE	-0.498673	-0.0856581	-0.00474141	0.0909643	-0.135941	0.070642	0.0283608	0.0949318	-0.0105313	0.0134991	-0.00837715	0.0201549	0.246905	0.937518	0.491065	0.336895	0.359949	0.71269	0.255155	0.897703	6.79212e-06	0.143712	0.71238	0.973776
577	trigonelline (N'-methylnicotinate)	1656	TRUE	-0.473682	0.040592	-0.00438239	0.0426806	0.0956782	-0.0701866	-0.0765315	-0.0863747	-0.0714035	0.0181646	-0.0157637	0.0266299	0.581519	0.941982	0.745524	0.497188	0.360908	0.318201	0.298347	0.381259	1.1831e-09	0.00571604	0.871549	0.976094
450	N-acetylisoleucine	1656	TRUE	-1.47001	0.0405569	0.00427369	0.530047	0.140979	-0.0570818	-0.196305	-0.0259179	-0.0144355	0.0137728	0.0315463	2.37484e-12	0.574696	0.942346	4.00725e-05	0.308029	0.448956	0.00908273	0.750495	0.856858	2.60828e-06	1.74422e-08	0.871549	0.976094
442	N-acetylaspartate (NAA)	1656	TRUE	-0.220138	-0.0716192	-0.00367219	0.151194	0.0770084	-0.335509	-0.135316	-0.241373	-0.0322791	0.00917965	-0.00352412	0.301588	0.329529	0.951242	0.249005	0.583758	1.19183e-05	0.0767973	0.00356835	0.691457	0.00205559	0.535593	0.73533	0.982909
691	X - 17299	1656	TRUE	-2.31275	0.138216	0.00348815	0.752309	0.029183	-0.0246776	-0.0591323	-0.0458818	-0.029915	0.0304506	0.0289403	6.94499e-30	0.0489614	0.951539	1.9532e-09	0.828012	0.736105	0.418447	0.562203	0.700348	1.04571e-26	1.02083e-07	0.492897	0.982909
545	sphingomyelin (d18:2/24:1, d18:1/24:2)*	1656	TRUE	-2.37705	-0.048653	0.00286504	-0.235634	-0.155336	0.00999313	-0.0294976	-0.0535123	-0.164352	0.035589	0.0239761	2.74866e-31	0.489637	0.960314	0.0609483	0.249015	0.891788	0.687428	0.500422	0.0350589	1.18572e-35	1.10273e-05	0.83731	0.990307
316	docosapentaenoate (n3 DPA; 22:5n3)	1656	TRUE	-1.65628	-0.12421	-0.00280996	0.216484	-0.048828	-0.214836	-0.289639	-0.0456978	-0.0250791	0.0325843	0.0048848	8.09179e-16	0.0797619	0.961335	0.0872442	0.718893	0.00366997	8.69569e-05	0.567596	0.749364	8.80838e-30	0.373649	0.52551	0.990307
303	cytidine	1656	TRUE	-1.25708	-0.0295662	-0.00267419	0.0417699	0.244507	-0.0522775	0.0636218	-0.0264519	0.0304525	0.00934512	0.0303788	2.40968e-09	0.683861	0.964071	0.747327	0.0784388	0.49004	0.399979	0.746659	0.704863	0.00150331	6.5856e-08	0.898241	0.991766
5	1-(1-enyl-palmitoyl)-2-docosahexaenoyl-GPE (P-16:0/22:6)*	1656	TRUE	-1.44487	0.0908739	-0.00240972	-0.103584	-0.092595	0.0194619	-0.00367705	-0.0979453	-0.102685	0.0292746	-0.00146656	5.32263e-12	0.208229	0.967444	0.421783	0.502786	0.796114	0.96099	0.229071	0.199066	1.55865e-23	0.793146	0.697494	0.992382
190	3-hydroxyoctanoate	1656	TRUE	-1.54468	-0.0126061	0.00232366	0.291108	-0.20648	-0.298417	-0.198424	-0.203563	-0.0339277	0.024647	0.0171387	1.35411e-13	0.860901	0.968488	0.0234453	0.13364	6.98842e-05	0.00806562	0.0121039	0.67018	2.94061e-17	0.0020983	0.956401	0.992382
341	gamma-glutamylmethionine	1656	TRUE	-1.31029	0.0243165	-0.00229168	0.644759	-0.106882	0.0154473	-0.229358	-0.115074	-0.0462292	0.0237299	0.00580332	3.62505e-10	0.735699	0.968963	5.37645e-07	0.43812	0.837124	0.00222637	0.156632	0.562218	4.52343e-16	0.298267	0.917489	0.992382
729	X - 23314	1656	TRUE	-0.0687178	-0.0667404	0.00227282	-0.0288251	-0.280893	-0.0172027	-0.0785897	-0.0414388	-0.00431344	0.0106814	-0.0167734	0.748205	0.36572	0.969947	0.826823	0.0466515	0.823136	0.306268	0.618481	0.957896	0.000356917	0.00333385	0.759727	0.992382
515	propionylglycine	1656	TRUE	0.179852	0.0277903	-0.00189727	-0.0536101	-0.109854	0.1274	-0.0176779	0.0796897	0.0564727	0.00744434	-0.0238486	0.400928	0.706508	0.974917	0.684156	0.436642	0.0979441	0.818031	0.338327	0.489543	0.0128629	3.01578e-05	0.905535	0.996111
409	leukotriene B4	1656	TRUE	-0.606982	0.0918105	0.00173932	0.107194	0.122538	0.185069	0.0615249	-0.050507	0.302565	0.00218033	0.0146001	0.00441249	0.211524	0.976905	0.413972	0.383512	0.0157602	0.421272	0.542212	0.000200488	0.464343	0.0103082	0.697494	0.996788
31	12-HETE	1656	TRUE	-0.98056	-0.0527071	0.00155249	0.195783	0.0195262	0.0770452	0.0199484	0.0553138	0.193344	0.00609138	0.0235532	4.42702e-06	0.474091	0.979426	0.136459	0.889775	0.315786	0.794679	0.50531	0.0177194	0.0413283	3.62358e-05	0.827184	0.997149
278	caprylate (8:0)	1656	TRUE	-0.625101	-0.0145366	-0.00148854	-0.0111142	-0.1805	-0.374155	-0.486495	-0.356606	-0.363068	0.0210751	-0.00444719	0.00288222	0.840654	0.979911	0.931398	0.19201	7.00811e-07	1.02493e-10	1.22209e-05	5.76087e-06	6.55011e-13	0.427089	0.947911	0.997149
226	5alpha-androstan-3beta,17beta-diol disulfate	1656	TRUE	-0.212258	0.030159	0.00126307	0.795274	0.00342594	0.0352279	0.0770532	-0.0303017	-0.0522796	-0.0100651	0.0268016	0.314388	0.678344	0.983052	9.10299e-10	0.980358	0.642352	0.308787	0.711761	0.516181	0.000641788	1.94889e-06	0.894755	0.997937
458	N-acetyltryptophan	1656	TRUE	-1.26613	0.0518547	0.00120952	0.501029	0.284144	0.0161839	-0.0451171	-0.107314	0.121708	0.00661743	0.0351115	1.95653e-09	0.47579	0.98377	0.000114065	0.0411505	0.831046	0.551205	0.190668	0.130663	0.0248199	4.53846e-10	0.827273	0.997937
153	2-hydroxydecanoate	1656	TRUE	-0.596403	0.103338	0.00101047	0.360175	-0.294611	-0.356931	-0.458059	-0.350906	-0.355941	0.0177272	-0.000289929	0.00435762	0.151798	0.986325	0.00515043	0.0327357	2.07704e-06	1.04617e-09	1.59205e-05	8.26542e-06	1.33437e-09	0.958594	0.623782	0.997937
99	1-palmitoyl-2-eicosapentaenoyl-GPC (16:0/20:5)*	1656	TRUE	-2.24839	0.146144	-0.000878243	-0.0303259	-0.066097	0.0673891	0.0618765	-0.0624219	-0.0137941	0.0350657	0.0163516	7.89437e-28	0.0392078	0.987908	0.810624	0.626002	0.362014	0.4017	0.434813	0.860479	3.06071e-34	0.0028934	0.459696	0.997937
654	X - 12847	1656	TRUE	1.14364	-0.092319	0.00089332	0.0208662	0.175058	-0.0335449	0.114639	0.0149744	-0.123321	-0.0213952	-0.00142043	6.83273e-08	0.206363	0.988068	0.872923	0.210498	0.659807	0.131755	0.855779	0.127411	5.12116e-13	0.801789	0.697494	0.997937
460	N-acetylvaline	1656	TRUE	-2.42527	0.0363147	0.000813046	0.706698	0.092618	-0.170548	-0.140499	-0.172299	-0.0863858	0.0228942	0.0525065	5.66253e-33	0.603327	0.988647	1.48787e-08	0.488579	0.0193081	0.0534751	0.0288028	0.264294	6.5423e-16	2.99719e-22	0.875397	0.997937
749	X - 24309	1656	TRUE	-0.697453	-0.0479475	-0.000589414	-0.0815357	0.015435	-0.032445	-0.0847704	-0.0601469	-0.137777	0.00141429	0.0274122	0.00105902	0.513709	0.992166	0.533982	0.912515	0.671813	0.267402	0.467563	0.0901222	0.634743	1.42969e-06	0.859219	0.999413
301	cysteine sulfinic acid	1656	TRUE	-0.889922	0.123525	-0.000509242	0.0288814	0.0728055	-0.135022	-0.0560265	-0.0813563	0.116248	0.00450205	0.0265719	3.21887e-05	0.0940894	0.993265	0.82648	0.606077	0.0793572	0.465758	0.328182	0.154767	0.132375	3.31839e-06	0.561549	0.999413
596	X - 10458	1656	TRUE	-0.983037	0.0410465	0.000371003	-0.0315394	0.107287	-0.14485	0.0217728	-0.0484206	0.335722	0.0112176	0.0149167	3.45736e-06	0.573921	0.99504	0.808813	0.442455	0.0571344	0.774501	0.556413	3.27703e-05	0.000150885	0.0083306	0.871549	0.999413
138	2,3-dihydroxyisovalerate	1656	TRUE	-0.323576	0.0505917	0.000241823	0.244122	-0.211427	-0.0473162	-0.0999509	0.0158551	-0.0139699	0.0130882	-0.012524	0.128967	0.491029	0.996788	0.0627448	0.132573	0.536921	0.191252	0.848227	0.863645	1.11443e-05	0.027722	0.83731	0.999413
685	X - 17166	1656	TRUE	-0.974063	0.00713025	0.000159383	0.123623	0.260767	0.0694905	0.108718	-0.248438	0.00589868	0.0053144	0.0267694	4.65279e-06	0.922516	0.997878	0.344968	0.0630357	0.363475	0.154298	0.00265459	0.942071	0.0738081	2.41869e-06	0.977311	0.999413
634	X - 12216	1656	TRUE	-0.175441	0.0167152	6.37644e-05	-0.0963757	-0.0248147	0.0693042	0.00880024	0.182595	0.053229	0.0143489	-0.0243461	0.40932	0.819592	0.999151	0.461473	0.859555	0.364646	0.908178	0.0271581	0.511889	1.37729e-06	1.79396e-05	0.947911	0.999413
703	X - 21339	1656	TRUE	0.314718	0.0166303	4.44855e-05	-0.173129	0.174388	-0.0441083	-0.0474659	-0.0379365	-0.0445783	-0.0140315	0.0172252	0.142202	0.821979	0.999413	0.189601	0.217577	0.567249	0.537333	0.649016	0.585977	2.84546e-06	0.00262087	0.947911	0.999413

## Sheet: Pre-Adjusted Enrichment
Positive APOE E2 Associations: Enriched Sub-Pathways
	total_size	total_in_set	overall_test_size	test_in_set_aka_overlap	pvalue	bon_adj_pvalue	fdr_adj_pvalue
Diacylglycerol	523	4	34	4	1.5e-05	0.001099	0.001099
Steroid	523	22	34	5	0.010159	0.741583	0.370791
Negative APOE E2 Associations: Enriched Sub-Pathways
	total_size	total_in_set	overall_test_size	test_in_set_aka_overlap	pvalue	bon_adj_pvalue	fdr_adj_pvalue
Sphingolipid Metabolism	523	19	15	6	4e-06	0.000295	0.000295
Positive APOE E4 Associations: Enriched Sub-Pathways
	total_size	total_in_set	overall_test_size	test_in_set_aka_overlap	pvalue	bon_adj_pvalue	fdr_adj_pvalue
Lysolipid	523	44	39	18	0	1.61561e-09	1.61561e-09
Monoacylglycerol	523	8	39	6	3e-06	0.000215768	0.000107884
Diacylglycerol	523	4	39	3	0.001462	0.106725	0.035575
Negative APOE E4 Associations: Enriched Sub-Pathways
	total_size	total_in_set	overall_test_size	test_in_set_aka_overlap	pvalue	bon_adj_pvalue	fdr_adj_pvalue
Xanthine Metabolism	523	12	15	4	0.000191	0.013953	0.013953
Ketone Bodies	523	1	15	1	0.028681	2.09369	1

## Sheet: Female APOE TwinsUK
	col1	n	converged	Intercept	C(APOE_Status, Treatment(reference=1))[T.E2]	C(APOE_Status, Treatment(reference=1))[T.E4]	Statin_User[T.Yes]	MetBatch[T.b2]	MetBatch[T.b3]	MetBatch[T.b4]	MetBatch[T.b5]	Age	BMI	Intercept_p	C(APOE_Status, Treatment(reference=1))[T.E2]_p	C(APOE_Status, Treatment(reference=1))[T.E4]_p	Statin_User[T.Yes]_p	MetBatch[T.b2]_p	MetBatch[T.b3]_p	MetBatch[T.b4]_p	MetBatch[T.b5]_p	Age_p	BMI_p	E2_pval_adj	E4_pval_adj
284	cholesterol	1595	TRUE	-2.64188	-0.275874	0.168152	0.0226367	0.0610594	0.0906313	0.00226526	-0.0490241	0.0411503	0.0196849	2.0421e-38	9.02333e-05	0.00388726	0.867316	0.404539	0.217125	0.977483	0.535856	1.39878e-47	0.000288893	0.0393281	0.194881
538	sphingomyelin (d18:1/20:0, d16:1/22:0)*	1595	TRUE	-1.90649	-0.279715	0.112951	-0.0352975	0.0224746	0.0116834	-0.119131	-0.0962263	0.0287593	0.0189078	6.22979e-20	0.000104596	0.0580585	0.799043	0.764307	0.876439	0.146888	0.235016	4.30778e-23	0.000667087	0.0393281	0.450103
655	X - 13431	1595	TRUE	-1.43559	0.268013	0.175655	0.167219	0.0258719	-0.0469992	0.00123981	-0.0629656	0.022825	0.00734291	1.4303e-11	0.00026396	0.0038202	0.236539	0.734804	0.53931	0.988179	0.445684	1.27207e-14	0.194655	0.0661661	0.194881
657	X - 13737	1595	TRUE	-1.35417	0.262502	0.0733403	0.225607	0.0505453	0.122263	0.175306	0.052696	0.010849	0.0256915	4.53692e-10	0.000471825	0.237319	0.118156	0.517292	0.118183	0.040382	0.532308	0.000337078	9.0002e-06	0.0848149	0.668404
235	5-hydroxylysine	1595	TRUE	-1.71581	0.253232	-0.0186906	0.249364	0.0205875	-0.101154	-0.01815	-0.0958383	0.00922525	0.0488994	6.67525e-16	0.000563929	0.758153	0.0774274	0.787427	0.186282	0.828223	0.245556	0.0018285	5.62207e-18	0.0848149	0.955116
318	dopamine 3-O-sulfate	1595	TRUE	-0.997293	0.233557	0.0945776	-0.239278	-0.0432602	-0.141222	-0.170223	-0.159211	0.0232456	-0.00588554	2.89149e-06	0.00152595	0.120474	0.0912852	0.572278	0.0659239	0.0425484	0.0545382	4.99742e-15	0.300019	0.168074	0.556958
274	butyrylcarnitine (C4)	1595	TRUE	-2.32473	0.22715	-0.0278099	0.0458014	-0.0707232	-0.0328239	0.000976056	-0.00549651	0.0250555	0.0402003	4.70132e-29	0.00156452	0.639506	0.740199	0.343611	0.661046	0.990482	0.945716	4.95198e-18	3.81626e-13	0.168074	0.907897
484	palmitoyl sphingomyelin (d18:1/16:0)	1595	TRUE	-1.36832	-0.219848	0.127815	-0.359705	-0.0123406	-0.0394141	-0.0957163	-0.129582	0.0322049	-0.00870016	6.79493e-11	0.00242115	0.032907	0.00986435	0.869925	0.601859	0.246343	0.111689	2.95707e-28	0.119381	0.186932	0.404457
741	X - 24065	1595	TRUE	0.710891	-0.225871	0.167634	-0.37638	0.0859457	0.0425635	-0.0304294	-0.10974	-0.00427008	-0.0191962	0.000995471	0.00247943	0.00659339	0.00874299	0.268113	0.584315	0.720441	0.190856	0.155837	0.000847946	0.186932	0.230257
265	behenoyl sphingomyelin (d18:1/22:0)*	1595	TRUE	-1.47284	-0.223424	0.109704	-0.0961114	-0.0038084	-0.0436133	-0.0810664	-0.139989	0.0213577	0.0171367	5.46373e-12	0.0024858	0.0723498	0.4986	0.960444	0.570998	0.33525	0.0917096	7.26109e-13	0.00260781	0.186932	0.471922
747	X - 24278	1595	TRUE	-1.44169	0.208481	0.00858035	0.327063	-0.0716924	0.0254433	-0.116437	-0.12953	0.0117598	0.0330478	1.28184e-11	0.00461762	0.887845	0.0208455	0.348813	0.740127	0.164881	0.117378	7.36796e-05	5.67831e-09	0.306937	0.975004
426	methylsuccinate	1595	TRUE	-0.804834	0.208984	-0.00631588	0.223625	-0.0998006	-0.145804	-0.185072	-0.22155	0.0169887	0.00074509	0.000180011	0.00489792	0.918065	0.117431	0.196218	0.0596307	0.0287054	0.00795359	1.38869e-08	0.896439	0.306937	0.980551
580	tryptophan betaine	1595	TRUE	1.16477	-0.195252	-0.0905728	-0.109349	-0.00980174	-0.13547	-0.135937	-0.087371	-0.0209181	0.0017444	3.95937e-08	0.0077277	0.134959	0.437897	0.89766	0.0761814	0.103504	0.288888	1.43967e-12	0.757487	0.419179	0.563485
34	16a-hydroxy DHEA 3-sulfate	1595	TRUE	0.827553	0.191652	-0.135221	-0.0911504	0.0760325	0.0748254	0.091025	-0.0128717	-0.021465	0.00893836	9.3288e-05	0.00884597	0.0254468	0.517329	0.317812	0.326742	0.275018	0.875683	3.47638e-13	0.113143	0.419179	0.371908
212	androstenediol (3beta,17beta) monosulfate (2)	1595	TRUE	0.472632	0.192127	-0.056595	-0.0621698	0.127185	0.0965828	0.207816	0.217826	-0.0242433	0.0249008	0.0265578	0.00909682	0.352619	0.660727	0.0967487	0.208348	0.0132528	0.00850621	3.19114e-16	1.15236e-05	0.419179	0.760302
18	1-(1-enyl-stearoyl)-2-oleoyl-GPE (P-18:0/18:1)	1595	TRUE	-0.518105	0.193421	0.0159988	-0.111425	-0.0201199	-0.0360248	0.049145	-0.184942	0.0111969	-0.00217936	0.0166731	0.00972566	0.795857	0.43863	0.795883	0.644059	0.564136	0.0278369	0.000204605	0.705444	0.419179	0.961691
591	X - 02249	1595	TRUE	-1.83657	0.187944	0.108418	0.0405323	0.0779992	0.00962279	-0.0249706	0.0102187	0.0255911	0.0180899	3.73979e-18	0.0101208	0.0727055	0.773038	0.304631	0.899466	0.764207	0.90099	3.69869e-18	0.00131951	0.419179	0.471922
178	3-(3-hydroxyphenyl)propionate	1595	TRUE	0.455215	-0.189413	-0.127197	0.0275848	-0.111138	-0.109339	-0.15557	-0.13135	-0.00372992	-0.00419021	0.0358587	0.0115317	0.0401473	0.848285	0.153966	0.161767	0.0685336	0.119074	0.217137	0.46839	0.419179	0.416536
327	ethylmalonate	1595	TRUE	-1.13907	0.184982	-0.0931773	0.011759	-0.0964332	-0.0879408	-0.112792	-0.0285047	0.0174049	0.011461	9.30328e-08	0.0121156	0.126326	0.933907	0.208415	0.252479	0.179295	0.730869	4.73101e-09	0.0437171	0.419179	0.563485
81	1-oleoyl-2-eicosapentaenoyl-GPC (18:1/20:5)*	1595	TRUE	-1.60669	0.182775	0.0241849	0.102537	0.131275	0.185219	0.0446962	0.110357	0.0256963	0.00632318	2.76543e-14	0.0122751	0.68853	0.465072	0.083644	0.0148996	0.590853	0.178532	2.44718e-18	0.260989	0.419179	0.921689
608	X - 11442	1595	TRUE	0.896934	-0.186442	0.0287123	0.116946	0.133452	0.0122469	-0.0946213	-0.0986836	-0.00199207	-0.0306011	3.33651e-05	0.0125895	0.642032	0.415722	0.0858246	0.875039	0.266262	0.239954	0.508332	1.07364e-07	0.419179	0.907897
659	X - 13866	1595	TRUE	-1.68979	0.181099	0.0840021	0.0981149	0.0208835	0.0673857	-0.0565236	0.10982	0.0296633	0.00326279	9.00968e-16	0.0126766	0.161883	0.48251	0.782179	0.373494	0.494593	0.178634	4.07124e-24	0.560083	0.419179	0.604092
111	palmitoyl-linoleoyl-glycerol (16:0/18:2) [2]*	1595	TRUE	-2.45628	0.177135	0.104728	0.128441	0.00369766	-0.0264683	0.089316	0.0439969	0.0190792	0.0547874	2.72479e-32	0.0135815	0.0775059	0.352038	0.960476	0.723444	0.274589	0.585437	4.23538e-11	3.95497e-23	0.419179	0.489785
209	androstenediol (3beta,17beta) disulfate (1)	1595	TRUE	-0.0753262	0.181221	-0.0578342	-0.0699017	0.0144591	-0.0116965	0.0204015	-0.0308696	-0.0160898	0.0343398	0.72365	0.0138551	0.342045	0.621568	0.850201	0.878869	0.80783	0.70915	5.92636e-08	1.44149e-09	0.419179	0.7521
692	X - 17337	1595	TRUE	-2.57483	0.17544	0.0289426	-0.0809518	-0.0368796	-0.0475545	-0.0555268	0.0300419	0.0321085	0.0356566	1.30165e-35	0.0140771	0.624124	0.555773	0.619587	0.523107	0.495101	0.708338	7.27169e-29	9.49538e-11	0.419179	0.907897
607	X - 11441	1595	TRUE	0.960257	-0.17986	-0.0053562	0.101772	0.110281	0.0562665	-0.0368008	-0.0388192	-0.00250022	-0.032796	9.19512e-06	0.0162446	0.931002	0.479456	0.156367	0.470663	0.665953	0.644412	0.407171	1.29914e-08	0.419179	0.980551
551	stearoyl sphingomyelin (d18:1/18:0)	1595	TRUE	-2.63677	-0.169231	0.105755	-0.106976	0.0205468	0.0197276	-0.0312345	-0.0361909	0.0330492	0.0374121	5.23267e-38	0.0167066	0.0704259	0.431491	0.779888	0.788956	0.698195	0.648851	4.37221e-31	6.67627e-12	0.419179	0.471922
671	X - 15666	1595	TRUE	-0.440849	0.179899	0.0875978	0.0173188	0.023021	-0.0721081	-0.0626605	0.100284	0.00477488	0.00611337	0.042827	0.016797	0.158977	0.904719	0.768523	0.357785	0.46468	0.235629	0.115355	0.291744	0.419179	0.604092
474	guaiacol sulfate	1595	TRUE	-1.29467	0.175105	-0.0588996	-0.0614731	-0.0548792	-0.0925638	-0.0499753	-0.067277	0.0254865	0.00094841	1.2285e-09	0.0174246	0.33329	0.66425	0.47354	0.227841	0.551357	0.416331	9.01694e-18	0.867299	0.419179	0.745931
194	3-methoxytyrosine	1595	TRUE	-1.02984	0.176802	-0.00201586	-0.112942	-0.00523168	-0.0316332	0.0450584	0.0307999	0.0233666	-0.00755859	1.8372e-06	0.0178164	0.973928	0.431233	0.946234	0.684187	0.596027	0.713423	7.89803e-15	0.188734	0.419179	0.992625
540	sphingomyelin (d18:1/21:0, d17:1/22:0, d16:1/23:0)*	1595	TRUE	-1.92921	-0.168675	0.117337	-0.128809	0.0512221	-0.0254921	-0.067532	-0.125464	0.0333429	0.010396	7.70965e-21	0.0178624	0.0462424	0.346948	0.489069	0.731262	0.405141	0.116998	3.43008e-31	0.0582181	0.419179	0.424077
635	X - 12230	1595	TRUE	-0.0965101	0.175229	0.0292133	-0.154915	0.0158123	-0.0938014	-0.0529547	-0.159798	0.0137471	-0.0223234	0.652867	0.0181473	0.633719	0.277414	0.837525	0.224947	0.530784	0.0552344	4.25429e-06	9.4107e-05	0.419179	0.907897
482	palmitoyl dihydrosphingomyelin (d18:0/16:0)*	1595	TRUE	-1.35704	-0.171449	0.120805	-0.27968	-0.0246184	0.0356318	-0.0107108	-0.121204	0.0263139	0.00174921	1.31627e-10	0.0188496	0.0452992	0.0463523	0.745671	0.639565	0.897515	0.139617	3.79911e-19	0.755884	0.419179	0.421504
211	androstenediol (3beta,17beta) monosulfate (1)	1595	TRUE	0.77153	0.164991	-0.0766399	-0.0976566	-0.0298926	-0.0298142	0.00333105	-0.0700545	-0.0341556	0.0385934	0.000183583	0.0206568	0.193446	0.476287	0.686741	0.688244	0.967282	0.381965	1.40174e-32	2.16052e-12	0.419179	0.633884
306	deoxycarnitine	1595	TRUE	-0.396193	0.17208	0.0407968	0.0995579	-0.0115658	-0.0377433	0.000860028	-0.155051	0.00316797	0.00797899	0.0659612	0.0208668	0.50756	0.486998	0.881269	0.626811	0.991912	0.0639878	0.291303	0.16453	0.419179	0.840072
221	4-methylcatechol sulfate	1595	TRUE	-0.614333	0.171543	0.0855567	-0.191418	-0.00581279	0.0745369	0.0661252	0.00237371	0.0132079	-0.00477987	0.00428771	0.0210371	0.163876	0.180621	0.940055	0.336082	0.43491	0.977337	1.04548e-05	0.404176	0.419179	0.604092
305	dehydroepiandrosterone sulfate (DHEA-S)	1595	TRUE	1.77296	0.163922	-0.0914271	-0.100777	-0.0556734	-0.105537	-0.0824753	-0.225694	-0.0391136	0.0121947	9.36229e-18	0.0217106	0.121433	0.463054	0.45335	0.156205	0.310636	0.0049237	4.68169e-42	0.0267148	0.419179	0.556958
521	pyrraline	1595	TRUE	-0.968251	0.170151	0.121486	-0.203455	-0.218819	-0.290146	-0.224944	-0.247258	0.0142115	0.0158735	6.47336e-06	0.0218473	0.0476369	0.153931	0.00456327	0.000175642	0.00778396	0.00302878	2.01825e-06	0.00551014	0.419179	0.424419
37	1-adrenoyl-GPC (22:4)*	1595	TRUE	-0.255469	-0.172108	0.02831	0.0498735	0.0292014	0.0708381	0.0627099	-0.0186785	0.001122	0.00698519	0.23981	0.0219638	0.648468	0.729923	0.708495	0.365598	0.463659	0.824916	0.710974	0.22764	0.419179	0.907897
567	theobromine	1595	TRUE	-0.419429	0.169738	-0.0846299	-0.0652555	-0.0828591	0.0302178	-0.0164758	0.0690434	-0.00415392	0.0252783	0.0518318	0.0228095	0.169693	0.649013	0.285097	0.697367	0.846175	0.409962	0.166887	1.08676e-05	0.419179	0.609557
198	3-methyladipate	1595	TRUE	-1.38359	0.163595	0.0367958	0.147796	-0.0876652	0.0526563	-0.199207	-0.0809295	0.0341042	-0.0136018	3.0567e-11	0.0230469	0.536322	0.285668	0.241451	0.482765	0.0151202	0.31715	6.70875e-32	0.0142173	0.419179	0.874867
569	threonate	1595	TRUE	-0.66369	-0.167391	-0.00798192	-0.175358	0.162295	-0.0342693	0.115969	0.0948146	0.0196333	-0.0146301	0.0019883	0.024065	0.896451	0.219061	0.0353842	0.657645	0.170004	0.255524	5.19769e-11	0.0105127	0.419179	0.975004
82	oleoyl-linoleoyl-glycerol (18:1/18:2) [1]	1595	TRUE	-1.59375	0.164568	0.120954	0.287115	-0.0680102	-0.0238278	-0.000734166	-0.0556594	0.00797093	0.0450921	4.62876e-14	0.0242578	0.0451502	0.0409507	0.370485	0.754281	0.99296	0.49777	0.00678082	1.14731e-15	0.419179	0.421504
488	p-cresol sulfate	1595	TRUE	-0.237016	0.165777	0.0926774	0.0728857	0.110341	0.109108	0.150059	0.0313602	0.0126663	-0.0208241	0.269926	0.0255897	0.131098	0.609782	0.152957	0.158615	0.0760637	0.707104	2.31867e-05	0.000274236	0.419179	0.563485
544	sphingomyelin (d18:2/23:0, d18:1/23:1, d17:1/24:1)*	1595	TRUE	-2.31751	-0.155043	0.0708766	-0.164088	0.0487557	-0.0306658	-0.102247	-0.15043	0.0428877	0.00718604	9.44003e-31	0.0256574	0.217198	0.219439	0.499732	0.67196	0.196403	0.0540654	6.19854e-53	0.179629	0.419179	0.658154
125	1-stearoyl-2-docosahexaenoyl-GPE (18:0/22:6)*	1595	TRUE	-2.4874	0.160013	0.101913	0.117876	0.00994358	0.0301753	-0.02142	-0.00510234	0.0318628	0.03175	4.27518e-33	0.0257186	0.0856972	0.392874	0.893944	0.686525	0.793229	0.949542	3.09146e-28	9.33732e-09	0.419179	0.490482
653	X - 12846	1595	TRUE	-1.53029	0.163235	-0.0167441	0.277069	0.0541658	-0.0327477	0.104707	0.0602558	0.0127637	0.0310536	6.79929e-13	0.0266381	0.783249	0.0503899	0.479243	0.669592	0.211905	0.46656	1.70436e-05	4.45364e-08	0.419179	0.961691
217	4-hydroxyphenylacetate	1595	TRUE	-1.23415	0.161445	0.0857185	0.152562	-0.00693194	-0.138556	-0.0732872	0.0616863	0.0125938	0.0223242	7.09836e-09	0.0284733	0.159392	0.281701	0.927912	0.0712393	0.382642	0.456412	2.23746e-05	8.47759e-05	0.419179	0.604092
353	glutarylcarnitine (C5-DC)	1595	TRUE	-1.87422	0.15994	0.0916163	0.137788	0.0549039	0.113151	0.0351809	0.0904001	0.0211713	0.0260353	7.92197e-19	0.0286953	0.129527	0.327067	0.470101	0.137551	0.672697	0.271254	6.74641e-13	3.82706e-06	0.419179	0.563485
233	5-hydroxyhexanoate	1595	TRUE	-0.166847	0.164795	0.0479487	-0.140547	-0.0506079	-0.0951855	-0.01445	0.113934	0.0106612	-0.0150568	0.444371	0.0288543	0.441735	0.332422	0.518577	0.225824	0.866399	0.178817	0.000451829	0.00957327	0.419179	0.824699
679	X - 16938	1595	TRUE	-0.517311	-0.16477	0.00229414	0.278243	0.108618	0.148606	-0.00459659	0.0986806	0.00923128	-0.000781335	0.017791	0.0289751	0.970657	0.0551515	0.166156	0.0587859	0.957346	0.244541	0.00240147	0.893113	0.419179	0.991759
740	X - 24061	1595	TRUE	0.543099	-0.162753	0.0335094	-0.425656	0.00119989	-0.0629042	0.00385993	-0.14377	-0.00157044	-0.0152863	0.012	0.0294097	0.587488	0.00305621	0.987678	0.419277	0.963831	0.086927	0.602091	0.00794987	0.419179	0.902091
555	succinimide	1595	TRUE	0.446445	-0.159076	-0.00607316	0.105908	-0.0530074	-0.241407	-0.204142	-0.109118	0.00121373	-0.0148717	0.0347666	0.0295432	0.919941	0.451205	0.485508	0.0015314	0.0142185	0.184118	0.680381	0.00829723	0.419179	0.980551
110	1-palmitoyl-2-stearoyl-GPC (16:0/18:0)	1595	TRUE	-1.03558	-0.158946	0.145129	-0.0169562	0.0394048	-0.0810499	-0.00495886	-0.186091	0.0249751	-0.00870382	1.10409e-06	0.0305111	0.0168631	0.904473	0.605946	0.289842	0.95275	0.0242184	3.3472e-17	0.124264	0.424895	0.362316
698	X - 18914	1595	TRUE	-0.500568	0.16038	0.0238827	0.456411	0.11641	0.149857	0.0274542	-0.0800917	-0.00392914	0.0240708	0.0207415	0.0320614	0.699368	0.00151253	0.134507	0.0546263	0.747339	0.340845	0.192593	2.98639e-05	0.434031	0.921689
715	X - 21736	1595	TRUE	-1.83535	0.15715	0.0180119	-0.0472111	-0.0245138	0.0795304	-0.0513705	0.0893884	0.0214919	0.0273177	6.38793e-18	0.0326286	0.767032	0.73854	0.748533	0.299506	0.53977	0.279538	4.1793e-13	1.44173e-06	0.434031	0.959748
391	indolelactate	1595	TRUE	-1.0163	0.157343	0.000490926	0.110911	-0.0835988	-0.0918307	-0.117097	-0.154511	0.0119267	0.0175648	2.02186e-06	0.0333318	0.993591	0.435358	0.276803	0.233382	0.164418	0.0629722	6.2787e-05	0.00205324	0.434031	0.996823
397	isoleucylvaline	1595	TRUE	-0.272099	0.157122	0.124418	0.200775	0.0198959	0.203334	-0.156201	0.0871531	-0.00148746	0.00994079	0.207736	0.0353261	0.0437876	0.161969	0.797695	0.0089682	0.0662372	0.298944	0.621082	0.0840433	0.434031	0.421504
605	X - 11438	1595	TRUE	-1.21857	0.155701	-0.00248521	-0.0993879	-0.0628684	-0.0300568	-0.115913	0.0799122	0.0259331	-0.00397498	1.33404e-08	0.0357081	0.967651	0.485713	0.414691	0.69727	0.169867	0.337508	4.00096e-18	0.486615	0.434031	0.990032
732	X - 23593	1595	TRUE	-1.79483	0.153066	0.040487	-0.10033	0.0363661	-0.177895	-0.0880322	-0.0734334	0.0289914	0.0129557	1.92804e-17	0.0360231	0.50228	0.474825	0.631849	0.0193852	0.289775	0.370793	6.68727e-23	0.0213006	0.434031	0.839365
691	X - 17299	1595	TRUE	-2.34106	0.147993	0.0165831	-0.0161361	-0.00547494	-0.051156	-0.0118732	-0.031192	0.0309482	0.0284723	2.30368e-30	0.0362262	0.776482	0.905475	0.940593	0.487292	0.882728	0.694494	1.67097e-27	1.7121e-07	0.434031	0.961691
156	2-hydroxyoctanoate	1595	TRUE	-0.76845	0.154772	0.0813646	0.19106	-0.191815	-0.0820135	-0.174315	-0.124393	0.00107263	0.0307244	0.000328429	0.036362	0.183186	0.179118	0.0126033	0.287296	0.0385159	0.134487	0.718957	7.01981e-08	0.434031	0.61987
99	1-palmitoyl-2-eicosapentaenoyl-GPC (16:0/20:5)*	1595	TRUE	-2.2823	0.14992	0.00602085	-0.100826	0.0734857	0.0642951	-0.0635449	0.008936	0.0356864	0.0161652	4.08893e-28	0.0366839	0.91915	0.464987	0.324622	0.389952	0.436906	0.911773	5.61844e-35	0.00346694	0.434031	0.980551
559	tartronate (hydroxymalonate)	1595	TRUE	0.174199	-0.155655	0.00303858	-0.333573	0.0234921	0.0198186	-0.0721604	-0.0637166	0.0129596	-0.0312498	0.420178	0.037174	0.96075	0.0202201	0.762269	0.799052	0.39638	0.447864	1.67351e-05	5.68953e-08	0.434031	0.990032
613	X - 11522	1595	TRUE	1.24817	-0.155122	0.0131603	-0.0877229	0.227935	0.0213757	0.13033	-0.0827725	-0.0054752	-0.0400629	7.30107e-09	0.0375665	0.83099	0.540845	0.0032919	0.783354	0.125062	0.323488	0.0685979	3.19936e-12	0.434031	0.961691
312	dimethylarginine (SDMA + ADMA)	1595	TRUE	-2.29504	0.146613	-0.063157	-0.0948521	-0.0709061	-0.108524	0.0658428	-0.0883152	0.0376115	0.0153934	3.20599e-29	0.0380932	0.279808	0.485368	0.334694	0.14078	0.413563	0.266346	8.84402e-40	0.00472475	0.434031	0.711028
84	oleoyl-linoleoyl-glycerol (18:1/18:2) [2]	1595	TRUE	-1.9058	0.149698	0.11752	0.210113	-0.00383387	-0.00616266	0.0344663	-0.00651612	0.0130444	0.0460297	9.46047e-20	0.0387555	0.0496643	0.131429	0.959396	0.934936	0.676128	0.936201	7.89002e-06	1.64193e-16	0.434987	0.429282
47	1-dihomo-linoleoyl-GPC (20:2)*	1595	TRUE	-0.897787	-0.150027	0.106086	0.104129	0.0880766	0.162911	0.12143	0.0354445	0.020713	-0.00995376	2.49605e-05	0.0415696	0.081298	0.46204	0.249861	0.0337407	0.147619	0.668383	2.94912e-12	0.0793867	0.448992	0.490437
536	sphingomyelin (d18:1/17:0, d17:1/18:0, d19:1/16:0)	1595	TRUE	-2.0026	-0.143743	0.118466	-0.147303	0.0283068	-0.0726652	-0.103606	-0.160058	0.0388152	0.0030623	1.07917e-22	0.0417577	0.0423713	0.277956	0.699772	0.323395	0.197654	0.0436866	2.32733e-42	0.57359	0.448992	0.421504
694	X - 18249	1595	TRUE	-0.789079	0.15096	0.0358433	0.33136	0.0122102	0.0442135	-0.0404238	0.00246359	-0.00316905	0.0353817	0.000235244	0.0417945	0.558753	0.0201548	0.874172	0.567304	0.632275	0.97642	0.289064	6.00451e-10	0.448992	0.893289
432	N-(2-furoyl)glycine	1595	TRUE	-0.906296	0.149597	0.0554655	-0.141825	-0.241725	-0.239105	-0.268757	-0.315464	0.0184621	0.00581239	2.50381e-05	0.0441607	0.366683	0.321109	0.00176075	0.00202598	0.00150259	0.000159275	7.17567e-10	0.3103	0.455762	0.770238
101	palmitoyl-linoleoyl-glycerol (16:0/18:2) [1]*	1595	TRUE	-1.87197	0.145332	0.105102	0.21702	-0.132296	-0.0454283	0.0164748	-0.0455124	0.0104799	0.0519574	3.30172e-19	0.0442165	0.0783603	0.1182	0.0781263	0.546212	0.841297	0.575049	0.000318699	1.02696e-20	0.455762	0.490437
98	1-palmitoyl-2-docosahexaenoyl-GPE (16:0/22:6)*	1595	TRUE	-1.58186	0.147533	0.0914621	-0.00361149	-0.0147647	0.0404011	-0.0187959	-0.0147941	0.0285935	0.00331884	8.91908e-14	0.0442428	0.131351	0.979569	0.846449	0.597086	0.821971	0.857548	3.90532e-22	0.557066	0.455762	0.563485
310	dihomo-linolenate (20:3n3 or n6)	1595	TRUE	-1.3096	-0.147295	0.103414	0.166263	-0.0510836	-0.0672511	0.0150989	-0.000768215	0.0132295	0.0253025	1.03067e-09	0.0469934	0.0915773	0.243636	0.507582	0.384202	0.858128	0.992645	9.58581e-06	9.53889e-06	0.477554	0.49544
718	X - 21849	1595	TRUE	-1.21629	0.143342	-0.113488	0.185703	-0.159441	-0.0646706	-0.0369577	0.024731	0.00512868	0.0393794	1.08614e-08	0.0512829	0.0619234	0.189154	0.0370435	0.398816	0.659084	0.764779	0.0835955	3.71233e-12	0.514197	0.45279
512	prolylglycine	1595	TRUE	-1.86218	0.140604	0.0435937	-0.132372	-0.0782311	-0.252421	-0.184645	-0.108909	0.0303919	0.01557	7.8695e-19	0.0528947	0.467796	0.34329	0.300224	0.000854734	0.0256327	0.182164	3.02363e-25	0.00541327	0.521693	0.824699
20	1-(1-enyl-stearoyl)-GPE (P-18:0)*	1595	TRUE	-0.0730503	0.143312	0.0447556	0.0338086	0.0755961	0.0449498	0.032854	0.0705956	0.0106676	-0.0223213	0.733739	0.0535319	0.465769	0.812783	0.327324	0.56124	0.69761	0.397454	0.000363346	9.55667e-05	0.521693	0.824699
745	X - 24241	1595	TRUE	-0.930047	0.142745	0.0535048	0.22447	0.176406	0.0691631	0.0313818	0.0963675	0.0124417	0.00701466	1.55334e-05	0.0550297	0.384297	0.116666	0.0225724	0.372415	0.711158	0.249121	3.34009e-05	0.221199	0.521693	0.784866
54	1-eicosapentaenoyl-GPE (20:5)*	1595	TRUE	-1.79466	0.139922	0.108005	-0.158731	0.043238	0.0165415	0.0712606	0.102091	0.0280814	0.0105565	3.04891e-17	0.056811	0.0752929	0.261163	0.571299	0.828943	0.394419	0.21625	2.44263e-21	0.0622365	0.521693	0.482528
736	X - 23765	1595	TRUE	0.873449	-0.139598	-0.05518	-0.161172	0.110215	0.00957584	0.0388401	-0.0796733	0.00627158	-0.0459997	3.97695e-05	0.057458	0.363629	0.254037	0.149103	0.900492	0.642615	0.334665	0.034212	4.56007e-16	0.521693	0.766806
357	glycerophosphoethanolamine	1595	TRUE	-0.28424	0.142786	0.13052	0.250112	-0.00345629	0.043523	0.03042	0.0325467	0.00410554	0.00013376	0.191382	0.0575995	0.0357565	0.0837165	0.964739	0.578682	0.722494	0.700172	0.17558	0.981587	0.521693	0.41318
514	propionylcarnitine (C3)	1595	TRUE	-2.72926	0.132586	0.0688345	0.0656791	-0.0303263	-0.072502	-0.0273159	-0.0625149	0.0290547	0.0477659	1.40024e-41	0.0576352	0.233119	0.624814	0.676192	0.319212	0.731318	0.425766	5.62521e-25	7.03726e-19	0.521693	0.668404
25	1,3-dimethylurate	1595	TRUE	-1.1293	0.140592	-0.0984985	0.137172	-0.137556	-0.000336986	-0.0470919	0.0136577	0.0140646	0.0178354	1.52235e-07	0.0586488	0.109029	0.337395	0.0751751	0.99653	0.578203	0.870177	2.6932e-06	0.00185621	0.521693	0.529219
490	phenol sulfate	1595	TRUE	-1.01384	-0.139283	-0.0642486	0.0857317	-0.0379967	0.116475	0.0550098	0.0962788	0.0125506	0.0134516	2.0736e-06	0.0592475	0.292501	0.545992	0.620627	0.130143	0.51308	0.245973	2.47457e-05	0.0180893	0.521693	0.7164
434	N1-methyladenosine	1595	TRUE	-2.47421	0.134987	-0.0300586	0.118076	-0.00949633	0.0334605	0.068583	0.0222439	0.0260599	0.0427471	6.85554e-33	0.0593705	0.611516	0.391103	0.898482	0.653845	0.400361	0.782207	1.70595e-19	9.40127e-15	0.521693	0.907897
121	1-stearoyl-2-arachidonoyl-GPE (18:0/20:4)	1595	TRUE	-1.3085	0.140509	0.0648737	0.142806	0.0316656	0.0431937	0.0933001	-0.0208559	0.0112679	0.0261838	1.34253e-09	0.0596617	0.292842	0.319573	0.683107	0.578565	0.272273	0.803576	0.000178973	5.27326e-06	0.521693	0.7164
647	X - 12695	1595	TRUE	-1.1769	0.139146	-0.0746157	-0.0894078	-0.0468975	-0.171941	-0.0285723	-0.134238	0.0190328	0.0104587	4.99114e-08	0.062223	0.226405	0.533249	0.545516	0.0270471	0.736758	0.109461	2.48275e-10	0.0689782	0.537835	0.66118
107	1-palmitoyl-2-oleoyl-GPE (16:0/18:1)	1595	TRUE	-1.66368	0.136762	0.0330623	0.0307462	-0.0663159	-0.065652	-0.0286032	-0.179294	0.0143744	0.037933	5.72079e-15	0.0632577	0.586989	0.828101	0.386341	0.392275	0.73308	0.0302677	1.2763e-06	2.31885e-11	0.538762	0.902091
487	paraxanthine	1595	TRUE	-0.871999	0.137774	-0.128918	0.0953579	-0.307433	-0.199296	-0.1726	-0.171484	0.00783815	0.0260004	4.99854e-05	0.063763	0.0358591	0.504629	6.92505e-05	0.0100819	0.0414625	0.0400672	0.00888	5.64267e-06	0.538762	0.41318
439	N6-carboxymethyllysine	1595	TRUE	-1.42233	0.136141	-0.0188253	-0.111661	-0.0622699	-0.150156	-0.0865429	-0.0590504	0.0219721	0.0137009	2.75718e-11	0.0651897	0.757731	0.431601	0.417235	0.051011	0.303452	0.476689	1.54213e-13	0.0160486	0.542786	0.955116
733	X - 23639	1595	TRUE	-0.117075	0.133192	-0.111536	0.0968483	0.0611222	0.0515032	0.00550677	-0.00256888	0.023381	-0.0436281	0.578851	0.0677163	0.064207	0.489706	0.420029	0.497894	0.947131	0.97499	1.76954e-15	8.2002e-15	0.542786	0.45279
234	5-hydroxyindoleacetate	1595	TRUE	-1.11478	0.13507	0.027459	-0.194468	0.049295	-0.0642473	0.0541002	0.00926654	0.0247995	-0.00774726	1.88403e-07	0.0677891	0.653302	0.171496	0.521439	0.404534	0.52073	0.911229	8.81532e-17	0.174068	0.542786	0.907897
30	10-undecenoate (11:1n1)	1595	TRUE	-1.31132	0.135091	-0.0927036	-0.2803	-0.192617	-0.177203	-0.075315	0.0136372	0.0221971	0.0107142	9.34618e-10	0.0681459	0.129958	0.0490587	0.0123656	0.0216921	0.371984	0.869861	1.03872e-13	0.0605092	0.542786	0.563485
247	alanine	1595	TRUE	-1.6931	0.133233	-0.0186204	0.195229	-0.141001	-0.16904	-0.081952	-0.226293	0.0127628	0.0447051	1.28391e-15	0.0686997	0.758251	0.165412	0.0638817	0.0266881	0.325603	0.00594076	1.51576e-05	2.27455e-15	0.542786	0.955116
68	1-margaroyl-GPE (17:0)*	1595	TRUE	-0.521848	0.134589	0.143959	-0.218037	-0.141267	-0.203369	-0.111208	-0.209004	0.0176665	-0.0114745	0.0149464	0.0693935	0.0187896	0.126084	0.0667692	0.00847179	0.187769	0.0121076	3.34778e-09	0.0445682	0.542786	0.371908
295	creatine	1595	TRUE	-1.19263	0.132782	0.0500202	-0.0814713	0.0366057	0.0186656	-0.0695666	0.0157183	0.0164807	0.0135973	1.79399e-08	0.0697311	0.408502	0.56281	0.630576	0.806749	0.404174	0.848504	2.33779e-08	0.0159613	0.542786	0.803194
210	androstenediol (3beta,17beta) disulfate (2)	1595	TRUE	0.780238	0.13358	-0.0360056	0.0798921	0.0200316	0.00112366	-0.00193811	-0.0734138	-0.0259419	0.0207889	0.000258588	0.0703532	0.555133	0.573563	0.794081	0.988347	0.98161	0.376205	2.80184e-18	0.000257998	0.542786	0.893289
743	X - 24125	1595	TRUE	-2.37862	0.130661	0.121128	0.167617	0.045904	0.0932815	0.156284	0.062143	0.0164188	0.0553977	5.78479e-30	0.0707355	0.0426907	0.227992	0.541418	0.215751	0.0577423	0.44442	1.76003e-08	2.74341e-23	0.542786	0.421504
16	1-(1-enyl-stearoyl)-2-docosahexaenoyl-GPE (P-18:0/22:6)*	1595	TRUE	-0.786717	0.130839	0.0271855	-0.10156	0.0643651	0.0255763	-0.076683	-0.146287	0.0292092	-0.0281983	0.000185385	0.0720873	0.651203	0.467849	0.394753	0.73586	0.35475	0.0735741	2.23978e-23	4.91745e-07	0.544479	0.907897
90	1-palmitoleoylglycerol (16:1)*	1595	TRUE	-3.05784	0.125599	0.13923	0.00812088	0.0450096	0.017594	0.173475	0.190462	0.0298693	0.0545984	1.9619e-51	0.0730006	0.0162053	0.951933	0.536603	0.809582	0.0297145	0.0155639	3.7689e-26	4.88188e-24	0.544479	0.358422
44	1-dihomo-linolenoyl-GPC (20:3n3 or 6)*	1595	TRUE	-1.76869	-0.131519	0.0480786	0.167542	0.0742282	0.0983246	0.0587121	0.0149379	0.0171625	0.0328556	8.07092e-17	0.0731282	0.428061	0.235181	0.330646	0.198632	0.482482	0.856288	6.55934e-09	6.2962e-09	0.544479	0.81701
142	2-aminoheptanoate	1595	TRUE	-1.42905	0.131114	0.091424	0.253813	-0.0356431	-0.00327434	-0.0272426	-0.0123145	0.00828923	0.0377177	1.92903e-11	0.074847	0.132917	0.0729337	0.641364	0.965953	0.745223	0.881657	0.00520309	2.94639e-11	0.551813	0.563485
705	X - 21353	1595	TRUE	-1.03409	-0.130841	-0.119668	-0.160727	-0.206586	-0.0750636	-0.138496	-0.113318	0.0220959	0.00191559	1.34915e-06	0.0769125	0.0503256	0.258498	0.00722388	0.330205	0.100224	0.172848	1.25023e-13	0.736852	0.560572	0.429925
15	1-(1-enyl-stearoyl)-2-docosahexaenoyl-GPC (P-18:0/22:6)*	1595	TRUE	-0.455011	0.127499	0.00832589	-0.212197	0.0504066	-0.00887065	-0.0580748	-0.15889	0.0306473	-0.0433046	0.0294885	0.0776109	0.889125	0.126691	0.502185	0.906222	0.480392	0.0503742	6.68464e-26	7.42374e-15	0.560572	0.975004
94	1-palmitoyl-2-arachidonoyl-GPE (16:0/20:4)*	1595	TRUE	-0.914627	0.132014	0.0243774	-0.0434689	0.0385166	0.000351541	0.0554872	-0.0594835	0.0122624	0.0102175	2.567e-05	0.0788352	0.694612	0.76347	0.621872	0.996417	0.516662	0.481061	5.11825e-05	0.0775772	0.560572	0.921689
280	catechol sulfate	1595	TRUE	-0.216971	0.131194	-0.00166787	-0.260046	-0.115208	-0.135839	-0.13884	-0.156215	0.0138559	-0.0155528	0.315346	0.0790169	0.978449	0.0702323	0.137929	0.0809974	0.102713	0.0627656	4.17804e-06	0.00689902	0.560572	0.992974
275	caffeine	1595	TRUE	-1.16948	0.129063	-0.0851972	0.0596192	-0.268355	-0.158817	-0.210548	-0.149521	0.0111261	0.0302304	4.69208e-08	0.081148	0.163687	0.675256	0.000486708	0.0394773	0.0124968	0.0722126	0.000191336	1.15507e-07	0.566593	0.604092
123	1-stearoyl-2-dihomo-linolenoyl-GPC (18:0/20:3n3 or 6)*	1595	TRUE	-2.66584	-0.122379	-0.0153993	0.134399	0.0345976	0.00129762	0.00711147	-0.0902725	0.0196972	0.0657135	2.44662e-39	0.0813724	0.790779	0.319601	0.635572	0.985854	0.929155	0.252689	3.4183e-12	6.29825e-34	0.566593	0.961691
296	creatinine	1595	TRUE	-1.22436	0.127291	-0.0440307	0.0857117	-0.0209739	-0.0738096	-0.0384245	-0.106209	0.0173298	0.0134121	7.47325e-09	0.0821298	0.466932	0.542708	0.782918	0.333441	0.64501	0.196831	4.30524e-09	0.0174683	0.566621	0.824699
612	X - 11491	1595	TRUE	-1.33508	0.127617	0.112487	-0.028875	-0.0864211	-0.0429184	-0.0303644	-0.0743782	0.00749757	0.0370008	4.29265e-10	0.084271	0.0656305	0.839033	0.260797	0.577469	0.718382	0.370637	0.0118545	8.31725e-11	0.576107	0.45279
191	3-hydroxypyridine sulfate	1595	TRUE	-0.740187	0.126674	0.0520681	-0.0545337	-0.030207	-0.041496	-0.0458038	-0.196982	0.0208129	-0.011518	0.000538057	0.0866023	0.394159	0.701263	0.694293	0.590164	0.586467	0.0177429	2.84396e-12	0.0432108	0.579283	0.796761
301	cysteine sulfinic acid	1595	TRUE	-0.925288	0.128191	0.0164355	0.0979623	-0.115678	-0.0203952	-0.0672231	0.139661	0.00447061	0.027053	1.91187e-05	0.0866343	0.790425	0.49594	0.13697	0.793659	0.430223	0.0967231	0.138202	2.7089e-06	0.579283	0.961691
504	pipecolate	1595	TRUE	-0.419377	0.126348	0.0291996	0.00866908	0.022729	-0.0266166	-0.00657614	-0.111342	0.0186144	-0.0215071	0.0496139	0.0870465	0.632354	0.951316	0.767166	0.729435	0.937677	0.179687	3.98283e-10	0.000157203	0.579283	0.907897
187	3-hydroxyhippurate	1595	TRUE	-0.506802	-0.127683	-0.112915	-0.0536827	-0.084693	-0.115783	-0.136945	-0.11101	0.0123846	-7.20808e-05	0.0197187	0.0892312	0.0690419	0.710222	0.278252	0.139234	0.109556	0.188623	4.3199e-05	0.990068	0.581922	0.467743
195	3-methyl catechol sulfate (1)	1595	TRUE	-0.496603	0.126898	0.00174536	0.0382466	0.0202025	-0.0403571	-0.0905779	-0.146336	0.0123642	-0.00424999	0.0219108	0.0902042	0.977509	0.790585	0.795289	0.605148	0.288362	0.0821274	4.20783e-05	0.461562	0.581922	0.992974
213	4-ethylphenylsulfate	1595	TRUE	0.358527	0.126349	0.088179	-0.0652416	0.0600051	0.0291446	0.051473	0.0389012	0.0038428	-0.0243553	0.0966005	0.0902606	0.152646	0.649204	0.439037	0.707716	0.544605	0.642596	0.201153	2.26581e-05	0.581922	0.597464
46	1-dihomo-linolenylglycerol (20:3)	1595	TRUE	-1.74965	-0.125074	0.126364	0.260081	-0.0491822	0.174329	0.0872015	0.110297	0.015836	0.0333869	2.95224e-16	0.0908915	0.0387859	0.0675196	0.522522	0.0237553	0.300742	0.184638	1.09016e-07	4.74521e-09	0.581922	0.416536
78	1-nonadecanoyl-GPC (19:0)	1595	TRUE	0.224023	-0.123028	0.111122	0.0524328	0.0829633	0.0103462	0.0196785	-0.126365	0.021636	-0.0531205	0.287884	0.0913122	0.0650348	0.708247	0.273432	0.891628	0.812576	0.122798	1.74167e-13	3.08942e-21	0.581922	0.45279
231	5-HEPE	1595	TRUE	-1.46241	0.122356	0.0724897	-0.0366563	-0.0762028	-0.0665203	-0.302848	0.138769	0.0195239	0.0190881	5.71155e-12	0.0955285	0.232195	0.795104	0.318015	0.384555	0.00029217	0.0925423	4.13586e-11	0.00074035	0.601644	0.668404
181	3-aminoisobutyrate	1595	TRUE	-0.672074	0.122938	-0.0322107	-0.0183448	-0.044543	-0.0464602	-0.0783831	-0.0313565	0.0195199	-0.0121639	0.00168343	0.0964606	0.59828	0.89737	0.562395	0.546681	0.352152	0.705999	5.82738e-11	0.0328428	0.601644	0.902091
510	pro-hydroxy-pro	1595	TRUE	-1.05677	0.121161	-0.0539567	0.144235	-0.0817711	-0.0918087	-0.0378413	-0.0919423	0.0245207	-0.00627099	5.86756e-07	0.0975248	0.372027	0.305014	0.282099	0.228322	0.649594	0.263235	8.8105e-17	0.265811	0.601644	0.774971
568	theophylline	1595	TRUE	-0.788299	0.123679	-0.117615	0.161144	-0.216651	-0.0740664	-0.105318	-0.0507389	0.0071313	0.0208887	0.000262604	0.0976071	0.0566775	0.261702	0.00525282	0.341168	0.215567	0.545389	0.0177983	0.000283143	0.601644	0.446856
114	1-palmitoyl-GPE (16:0)	1595	TRUE	-0.887125	0.121922	0.183555	-0.118398	0.0372923	-0.00313326	0.0879084	0.0623362	0.0218035	-0.012139	3.5445e-05	0.10013	0.00274775	0.40637	0.628579	0.96766	0.297981	0.454469	2.98379e-13	0.0336629	0.612176	0.194881
619	X - 11787	1595	TRUE	-2.41893	0.114644	0.0611917	0.023142	0.0676765	-0.0137671	0.0212182	-0.137068	0.0356938	0.0212725	1.75809e-32	0.103711	0.293419	0.864383	0.355555	0.851286	0.79149	0.0834649	3.14005e-36	8.95066e-05	0.620765	0.7164
269	betaine	1595	TRUE	-0.176809	0.120725	0.043192	0.271385	0.0988329	0.00187418	0.0362635	-0.0769886	0.00776556	-0.0115609	0.410378	0.103914	0.481537	0.0573115	0.200376	0.980675	0.668047	0.356155	0.00945404	0.0433258	0.620765	0.830541
297	cyclo(leu-pro)	1595	TRUE	-1.4999	0.11976	-0.0162755	0.0144633	-0.131539	0.0485294	-0.0821014	0.0306653	0.0126951	0.0340297	2.15554e-12	0.104692	0.789659	0.918839	0.0865104	0.528143	0.328813	0.711638	1.97973e-05	2.20395e-09	0.620765	0.961691
489	p-cresol glucuronide*	1595	TRUE	-0.710384	0.12032	0.0310119	0.0997876	0.139781	0.156042	0.138419	0.151322	0.0128232	-0.00325145	0.000949041	0.105326	0.613564	0.484883	0.0703402	0.0438725	0.101903	0.069937	1.8491e-05	0.570124	0.620765	0.907897
50	1-docosahexaenoyl-GPE (22:6)*	1595	TRUE	-1.94863	0.11636	0.122435	-0.057444	-0.017158	-0.0273294	-0.100004	0.040061	0.0373193	0.000674914	1.17375e-20	0.107417	0.040435	0.679395	0.819388	0.716755	0.224486	0.621895	1.43669e-37	0.903565	0.620765	0.416536
614	X - 11530	1595	TRUE	1.24394	-0.120348	0.0226939	-0.06866	0.195678	-0.0097471	0.0767972	-0.107204	-0.00537804	-0.0392672	8.86401e-09	0.107461	0.713463	0.632967	0.0118224	0.900453	0.367175	0.202016	0.0743145	9.44405e-12	0.620765	0.929851
173	2-palmitoyl-GPE (16:0)*	1595	TRUE	-0.762756	0.120355	0.195071	-0.264411	0.0263888	0.00250855	0.0958362	0.0937479	0.0172449	-0.00840034	0.000434748	0.108286	0.0016389	0.0665535	0.73485	0.974379	0.261585	0.265698	1.13673e-08	0.145842	0.620765	0.194881
498	phenyllactate (PLA)	1595	TRUE	-0.680978	0.119001	-0.0283878	0.303346	-0.133709	-0.250648	-0.176804	-0.282601	0.00535256	0.0211131	0.00150877	0.108686	0.643412	0.0334722	0.0829859	0.00118759	0.0364097	0.000700177	0.0734372	0.00022182	0.620765	0.907897
539	sphingomyelin (d18:1/20:1, d18:2/20:0)*	1595	TRUE	-1.91148	-0.116024	0.076343	0.264954	-0.0168279	-0.0114127	-0.0885546	-0.151799	0.0249648	0.0269541	6.99322e-20	0.108964	0.201993	0.0569884	0.823064	0.879756	0.28282	0.0620536	1.16211e-17	1.35484e-06	0.620765	0.643638
455	N-acetylputrescine	1595	TRUE	-1.12804	0.118436	0.0285467	-0.0267768	-0.0519784	0.0657001	-0.0470259	0.00631271	0.0185271	0.00595553	1.48173e-07	0.110459	0.641634	0.851148	0.500457	0.395573	0.577952	0.939661	5.8397e-10	0.297689	0.624553	0.907897
413	lysine	1595	TRUE	-1.97103	0.114839	-0.0644373	0.0999833	-0.123901	-0.244549	-0.039231	-0.242289	0.0272808	0.0270802	4.73256e-21	0.112519	0.281371	0.472458	0.0995878	0.00118475	0.634114	0.0028908	8.49864e-21	1.2003e-06	0.626299	0.7123
316	docosapentaenoate (n3 DPA; 22:5n3)	1595	TRUE	-1.71816	-0.114687	0.03305	-0.107082	-0.19918	-0.266717	-0.0447197	0.0213865	0.0333636	0.00476714	2.23884e-16	0.11293	0.580524	0.441517	0.00809884	0.000404567	0.587386	0.792543	2.61426e-30	0.392595	0.626299	0.902091
143	2-aminooctanoate	1595	TRUE	-0.264909	0.118351	0.080322	0.167915	-0.102301	0.0424081	-0.0335904	-0.107706	0.00463315	0.000521643	0.220467	0.113267	0.193515	0.242639	0.18795	0.586111	0.693138	0.199719	0.124012	0.927835	0.626299	0.633884
600	X - 11308	1595	TRUE	0.56781	0.117778	-0.0462144	0.254538	-0.0227752	-0.051704	-0.00253847	-0.0450112	-0.0150427	0.00779821	0.00883003	0.116098	0.45572	0.077404	0.770083	0.508051	0.97628	0.593114	6.38161e-07	0.177029	0.637268	0.824699
604	X - 11429	1595	TRUE	-2.15436	0.113837	0.0433416	0.0574249	0.0311513	0.0380264	0.074207	0.0138414	0.0241903	0.0332057	1.53709e-24	0.118043	0.47157	0.681796	0.680778	0.616393	0.371057	0.865718	1.7147e-16	3.30341e-09	0.638615	0.824699
182	3-carboxy-4-methyl-5-propyl-2-furanpropanoate (CMPF)	1595	TRUE	-1.53336	0.111372	0.155406	0.26158	0.088307	0.229631	-0.0613423	0.0261829	0.0304836	-0.00613092	1.57084e-13	0.120911	0.00884136	0.0581886	0.236874	0.00215297	0.453284	0.745614	6.13678e-26	0.267946	0.638615	0.248124
446	N-acetylglutamate	1595	TRUE	-1.60299	0.11275	0.071281	-0.24985	-0.125706	-0.277513	-0.073552	-0.0141287	0.0236836	0.019058	2.86139e-14	0.121766	0.23662	0.0745669	0.0970371	0.000257832	0.375511	0.863021	7.36864e-16	0.000689477	0.638615	0.668404
27	1,7-dimethylurate	1595	TRUE	-1.64883	0.113036	-0.148298	0.109791	-0.238751	-0.0956315	-0.166245	-0.0732053	0.0192017	0.031552	6.38072e-15	0.122048	0.0141237	0.434816	0.00168203	0.20942	0.0458865	0.372931	7.18752e-11	2.14194e-08	0.638615	0.342614
578	trimethylamine N-oxide	1595	TRUE	-1.63943	0.11339	0.0466015	-0.0251342	0.034204	0.080761	0.0283865	0.0498776	0.0226972	0.0153183	1.17312e-14	0.122464	0.442537	0.858699	0.654065	0.291198	0.734271	0.545512	1.71521e-14	0.0067829	0.638615	0.824699
346	gamma-tocopherol/beta-tocopherol	1595	TRUE	0.077497	-0.11342	0.0204597	0.166503	0.0641661	0.0144311	0.0381718	0.0301658	-0.0106999	0.0176171	0.716015	0.123485	0.736769	0.239654	0.401941	0.850843	0.649037	0.715479	0.000311964	0.0019073	0.638615	0.943842
164	2-methylbutyrylcarnitine (C5)	1595	TRUE	-2.58831	0.108938	0.0113693	0.098507	-0.0338998	-0.034241	-0.0766127	-0.0604061	0.0313732	0.0382201	1.43057e-36	0.124058	0.846039	0.469573	0.645283	0.642777	0.342348	0.447981	4.32694e-28	2.53916e-12	0.638615	0.962573
642	X - 12511	1595	TRUE	-0.372327	0.114057	-0.0620387	0.309902	0.0138646	0.0415476	0.0327847	-0.0059179	0.00132307	0.0100642	0.0829788	0.124433	0.312015	0.029943	0.857435	0.591266	0.698228	0.943453	0.658357	0.0785654	0.638615	0.717539
158	2-hydroxyphenylacetate	1595	TRUE	-0.898517	0.114446	0.013846	0.0771989	-0.0437005	-0.095881	-0.102369	-0.131059	0.00621776	0.0244516	3.21437e-05	0.125501	0.822573	0.590984	0.573643	0.218115	0.22894	0.118507	0.0389123	2.16476e-05	0.638615	0.961691
53	1-eicosapentaenoyl-GPC (20:5)*	1595	TRUE	-1.82123	0.111036	0.0562735	0.0206619	0.0877071	0.111925	-0.0187894	0.0270162	0.0333691	0.00133676	4.10733e-18	0.125956	0.348137	0.882284	0.244986	0.138872	0.820167	0.740433	3.74544e-30	0.811078	0.638615	0.754464
169	2-oleoyl-GPE (18:1)*	1595	TRUE	-0.0236061	0.11559	0.0706127	0.0155402	-0.0875985	-0.124998	-0.0724969	-0.137399	0.00209432	-0.00131641	0.91404	0.126229	0.258445	0.914865	0.265014	0.112602	0.399809	0.105819	0.491843	0.821233	0.638615	0.689187
298	cystathionine	1595	TRUE	-2.43807	0.109471	0.0292621	0.238596	0.107787	-0.0216951	0.0487866	-0.000761536	0.031786	0.0289094	6.95915e-32	0.126891	0.621574	0.0836166	0.14828	0.771616	0.550357	0.992461	3.97284e-28	1.69082e-07	0.638615	0.907897
535	sphingomyelin (d17:1/16:0, d18:1/15:0, d16:1/17:0)*	1595	TRUE	-2.01655	-0.107573	0.0975409	-0.196227	0.0660477	-0.0131577	-0.110408	-0.132318	0.0390624	0.00205504	5.52939e-23	0.127642	0.0946922	0.148427	0.368286	0.8581	0.169841	0.0954459	7.1771e-43	0.705708	0.638615	0.508632
638	X - 12442	1595	TRUE	-1.23054	-0.112576	-0.130563	-0.143057	-0.198181	-0.0930477	-0.119995	-0.0754706	0.02444	0.00481252	9.07388e-09	0.128232	0.0328278	0.314822	0.0100066	0.2277	0.154625	0.364233	2.54852e-16	0.398827	0.638615	0.404457
731	X - 23587	1595	TRUE	-0.489565	0.11304	-0.071669	0.230136	-0.157572	-0.141772	-0.18438	-0.112981	0.00655365	0.0103508	0.0235241	0.130309	0.245889	0.10923	0.042518	0.0686748	0.0302814	0.178492	0.0295451	0.0722613	0.642329	0.681864
133	1-stearoyl-2-oleoyl-GPE (18:0/18:1)	1595	TRUE	-1.74167	0.111378	0.0640463	0.115186	0.0414321	0.0435576	0.083009	-0.0536956	0.01272	0.0405435	3.15504e-16	0.130789	0.2932	0.416447	0.588759	0.570729	0.322841	0.516886	1.85777e-05	9.5594e-13	0.642329	0.7164
272	bilirubin (Z,Z)	1595	TRUE	0.820462	-0.111829	0.0179499	-0.26074	0.261597	-0.0270165	0.184162	-0.145623	-0.000695224	-0.0328419	0.00013107	0.131541	0.769649	0.0674824	0.000691023	0.726664	0.0292377	0.0805858	0.81607	9.11184e-09	0.642329	0.960513
347	gluconate	1595	TRUE	-0.89816	-0.112253	-0.00193194	0.0957899	0.0583511	0.0159748	0.0949577	0.0437013	0.00916983	0.0159812	3.64337e-05	0.135452	0.975203	0.50766	0.455399	0.838468	0.267551	0.605053	0.00248013	0.00581872	0.649963	0.992625
648	X - 12748	1595	TRUE	-2.20941	0.108356	0.0690591	-0.0961605	-0.000181838	-0.121774	-0.0151125	0.180647	0.0300952	0.0247415	7.24647e-26	0.135666	0.249956	0.491081	0.998078	0.107624	0.855034	0.0268709	8.49605e-25	9.83871e-06	0.649963	0.681864
483	palmitoyl ethanolamide	1595	TRUE	-1.03676	-0.111136	-0.0780755	-0.25539	-0.0811112	-0.0804421	-0.00119816	-0.00232494	0.0140676	0.0147935	1.5012e-06	0.135697	0.204786	0.0745978	0.294927	0.300113	0.988733	0.977844	2.79151e-06	0.00996848	0.649963	0.644858
153	2-hydroxydecanoate	1595	TRUE	-0.60439	0.108422	-0.00806741	-0.284236	-0.373768	-0.475238	-0.34321	-0.359625	0.0177913	0.000230422	0.00419742	0.137327	0.893604	0.0428129	8.36486e-07	4.13608e-10	3.64205e-05	1.15978e-05	1.45772e-09	0.967319	0.653606	0.975004
14	1-(1-enyl-stearoyl)-2-arachidonoyl-GPE (P-18:0/20:4)*	1595	TRUE	-0.809538	0.109857	-0.0155505	-0.145435	-0.0370265	-0.0531401	-0.124367	-0.204575	0.0148309	0.00414843	0.000179028	0.141289	0.801118	0.311216	0.633451	0.494776	0.143746	0.0147959	8.34928e-07	0.471063	0.654132	0.961691
338	gamma-glutamylhistidine	1595	TRUE	-1.62416	0.108008	0.0322414	-0.169313	0.0702658	-0.176523	-0.0591055	0.0130969	0.0227359	0.0180209	2.20417e-14	0.141699	0.59565	0.230965	0.357828	0.0212024	0.480208	0.874028	1.66059e-14	0.00146637	0.654132	0.902091
681	X - 16946	1595	TRUE	0.787849	-0.109386	0.00972739	-0.0165927	0.0335766	-0.0338997	0.0463783	-0.080856	0.000376222	-0.031059	0.000267208	0.143146	0.874839	0.908054	0.665535	0.66329	0.585758	0.335559	0.900571	6.88263e-08	0.654132	0.973719
4	1-(1-enyl-palmitoyl)-2-docosahexaenoyl-GPC (P-16:0/22:6)*	1595	TRUE	-1.32559	0.10505	0.0188508	-0.21071	-0.0235241	-0.0499948	-0.138011	-0.136105	0.0367414	-0.0200858	1.82459e-10	0.143831	0.75101	0.127365	0.752895	0.504487	0.0918279	0.0919868	7.30972e-37	0.000287611	0.654132	0.955116
506	pregnenediol sulfate (C21H34O5S)*	1595	TRUE	1.85806	0.103759	-0.108388	-0.183069	-0.0585211	-0.0188333	-0.0336684	-0.191383	-0.0355031	0.000204414	1.51244e-19	0.143994	0.0648356	0.180077	0.428003	0.799144	0.677254	0.016491	2.50588e-35	0.970208	0.654132	0.45279
285	choline	1595	TRUE	-1.03672	0.109487	0.0319429	-0.000301031	0.0586913	0.078345	0.209535	0.11686	0.0157111	0.00452131	1.74111e-06	0.144058	0.606133	0.998334	0.451321	0.315871	0.014112	0.165341	1.98362e-07	0.433779	0.654132	0.904612
334	gamma-glutamyl-epsilon-lysine	1595	TRUE	-2.06821	0.104061	-0.0151543	0.0138512	-0.109137	-0.224411	-0.178587	-0.0417013	0.0305618	0.0226546	1.08274e-23	0.144143	0.79694	0.919476	0.140663	0.00251032	0.0277716	0.602526	1.89664e-26	3.69676e-05	0.654132	0.961691
533	S-methylcysteine	1595	TRUE	-0.000541632	0.108646	0.0628481	-0.0804543	0.0144875	0.0207107	-0.0481393	-0.0673695	0.0150424	-0.031255	0.997993	0.144396	0.307047	0.574075	0.851499	0.789495	0.570194	0.420645	5.33664e-07	5.08816e-08	0.654132	0.717539
616	X - 11538	1595	TRUE	-0.359077	0.107275	0.0670474	-0.232459	-0.114013	-0.162342	-0.221375	-0.0388946	0.0187932	-0.0204667	0.0953625	0.149459	0.275765	0.104318	0.140608	0.0363486	0.00901684	0.641923	3.72543e-10	0.000359318	0.663646	0.71019
215	4-hydroxychlorothalonil	1595	TRUE	-0.22325	0.107071	0.0519744	0.155253	0.0445656	0.106575	-0.196177	-0.0890983	0.0101157	-0.0121828	0.299386	0.1499	0.397801	0.277614	0.564315	0.169086	0.0205549	0.286378	0.00073805	0.0335232	0.663646	0.796761
134	1-stearoyl-GPC (18:0)	1595	TRUE	-1.266	-0.106305	0.136389	0.164196	0.0659031	-0.0884795	0.0655692	-0.0582371	0.023047	0.0022206	3.0953e-09	0.149956	0.0254465	0.24754	0.390635	0.250255	0.435638	0.482829	9.64504e-15	0.696382	0.663646	0.371908
404	laurate (12:0)	1595	TRUE	-1.03979	-0.106003	-0.0321955	-0.299372	-0.329075	-0.273275	-0.242193	-0.213813	0.0234631	0.00360668	1.10709e-06	0.150778	0.597554	0.0348511	1.78535e-05	0.000379445	0.00395235	0.00992016	3.01662e-15	0.525884	0.663646	0.902091
746	X - 24242	1595	TRUE	-1.55996	0.104154	-0.0136456	-0.041929	0.067192	0.0194141	0.0521176	-0.0485878	0.0257236	0.00805812	1.81836e-13	0.155042	0.82169	0.765955	0.377601	0.799256	0.532198	0.555047	2.95911e-18	0.153457	0.663646	0.961691
52	1-docosapentaenoyl-GPC (22:5n6)*	1595	TRUE	-0.115818	-0.106225	0.0474108	0.0318893	-0.0656716	-0.00571815	-0.0536591	-0.10622	0.00127159	0.00370685	0.59206	0.155074	0.44266	0.824344	0.397844	0.941458	0.528342	0.205858	0.672824	0.519718	0.663646	0.824699
253	alpha-tocopherol	1595	TRUE	0.102751	-0.106377	-0.00460833	-0.160859	0.18603	-0.0642545	0.279794	-0.0658181	0.00599152	-0.0181187	0.636251	0.156617	0.940821	0.265331	0.0171865	0.411667	0.00107207	0.435489	0.0477646	0.00174484	0.663646	0.982882
141	2-aminobutyrate	1595	TRUE	-1.67124	0.103942	-0.0511457	-0.0653643	-0.0632429	-0.0707822	-0.142934	-0.116771	0.0233088	0.0209698	3.63089e-15	0.156914	0.39944	0.643443	0.407443	0.355024	0.0874752	0.157088	3.39611e-15	0.000211083	0.663646	0.796761
23	1,2-dipalmitoyl-GPC (16:0/16:0)	1595	TRUE	-1.31642	-0.103567	0.0550081	-0.272474	-0.0893709	-0.187393	-0.205403	-0.281624	0.0296621	-0.00190228	5.40866e-10	0.157747	0.364029	0.0532743	0.240984	0.0141849	0.0139062	0.000630898	1.03604e-23	0.736362	0.663646	0.766806
92	1-palmitoyl-2-adrenoyl-GPC (16:0/22:4)*	1595	TRUE	-1.64777	-0.103509	-0.0698886	0.0952172	0.0140853	-0.0479817	0.0397193	0.0350318	0.014541	0.0361513	8.69892e-15	0.158628	0.249538	0.500097	0.853613	0.530662	0.634862	0.671196	8.95734e-07	1.67735e-10	0.663646	0.681864
468	N-palmitoyl-sphingosine (d18:1/16:0)	1595	TRUE	-2.26667	-0.100691	0.13399	0.112974	0.0448982	-0.0788673	-0.0489018	-0.104747	0.032849	0.0233622	5.62332e-28	0.15878	0.023296	0.410975	0.545591	0.28958	0.547955	0.192116	3.91085e-30	2.21223e-05	0.663646	0.371908
24	1,3,7-trimethylurate	1595	TRUE	-1.5558	0.102958	-0.0854847	0.105477	-0.298189	-0.221859	-0.23832	-0.178142	0.0151556	0.0386137	1.90721e-13	0.159083	0.15724	0.453151	8.75566e-05	0.00359767	0.00421603	0.030169	2.70802e-07	7.26017e-12	0.663646	0.603287
309	dihomo-linoleate (20:2n6)	1595	TRUE	-1.47599	-0.103181	-0.0552671	-0.160032	-0.225534	-0.223347	-0.0862712	0.042087	0.0275713	0.00758956	3.57979e-12	0.15968	0.362209	0.256751	0.00311354	0.00349507	0.301999	0.609817	1.13964e-20	0.179588	0.663646	0.766806
381	homoarginine	1595	TRUE	-1.36297	0.10381	-0.0174468	0.0494223	-0.0843532	-0.0488727	-0.0225496	-0.145241	0.00704664	0.0408433	1.75767e-10	0.159703	0.774971	0.727766	0.271796	0.525335	0.788595	0.0800542	0.0178859	7.07698e-13	0.663646	0.961691
402	kynurenine	1595	TRUE	-2.41974	0.101461	0.0348436	0.109357	0.0410623	0.0815233	0.0153856	-0.000255053	0.0194324	0.0531113	4.62042e-31	0.159734	0.559145	0.430689	0.584175	0.278401	0.851527	0.997491	2.37633e-11	1.30497e-21	0.663646	0.893289
556	succinylcarnitine (C4-DC)	1595	TRUE	-2.97707	0.0974557	0.0826054	0.22779	0.00988263	-0.00620644	-0.0291615	0.00404928	0.0325006	0.0489253	8.64287e-49	0.164444	0.153981	0.0910612	0.892135	0.932299	0.714949	0.959008	1.27307e-30	1.35228e-19	0.673103	0.597464
147	2-arachidonoyl-GPE (20:4)*	1595	TRUE	-0.315568	0.104921	0.123122	-0.04192	0.0720204	0.0939376	0.0965348	0.0922189	-0.000208409	0.00803327	0.148566	0.164666	0.0485372	0.772812	0.35892	0.232601	0.261698	0.277173	0.945405	0.167453	0.673103	0.424419
216	4-hydroxyhippurate	1595	TRUE	-0.725217	-0.103958	-0.0477641	-0.12336	-0.0295394	-0.0305753	0.077447	-0.00488361	0.0146112	0.000695339	0.000806857	0.164695	0.439938	0.391235	0.704136	0.694985	0.363489	0.953688	1.2657e-06	0.90402	0.673103	0.824699
706	X - 21365	1595	TRUE	-0.962935	-0.102315	0.0110813	0.53383	-0.015164	0.00473951	0.0831168	-0.110797	0.01609	0.00564991	8.04683e-06	0.170004	0.857319	0.000196897	0.844915	0.951368	0.327772	0.186123	8.61469e-08	0.325525	0.684827	0.965616
570	threonine	1595	TRUE	-0.170798	0.103476	-0.0871113	-0.110035	-0.165529	-0.155169	-0.18	-0.170882	0.00725824	-0.00229827	0.434819	0.171057	0.163303	0.449098	0.0351943	0.0488992	0.0365837	0.0442947	0.0172132	0.693231	0.684827	0.604092
583	uracil	1595	TRUE	-0.469605	-0.103416	0.0590149	-0.10715	0.155177	-0.0355817	0.0145107	0.0233127	0.00390779	0.00910324	0.032123	0.172181	0.345941	0.461997	0.0487965	0.652209	0.866449	0.784214	0.20058	0.118929	0.684827	0.75398
367	glycylglycine	1595	TRUE	-0.724068	-0.100909	-0.106505	-0.0192376	-0.00964804	0.00479108	0.158054	-0.00359401	0.00928481	0.0104707	0.000729974	0.173202	0.0820277	0.892594	0.900324	0.950526	0.0610935	0.965573	0.00187621	0.0666981	0.684827	0.490437
279	carnitine	1595	TRUE	-2.16332	0.0984563	0.0145471	0.367155	0.11188	0.0831015	0.0371763	-0.0467564	0.0251854	0.0307198	4.4602e-25	0.173213	0.807664	0.00826465	0.136597	0.270038	0.65165	0.564965	5.44716e-18	3.51265e-08	0.684827	0.961691
618	X - 11564	1595	TRUE	-3.21568	0.0941119	0.0196254	0.210655	-0.0192553	0.0629024	-0.0654705	0.0239682	0.035374	0.0531656	3.90384e-58	0.173532	0.731351	0.113174	0.788835	0.382787	0.40588	0.757783	6.60628e-37	1.94988e-23	0.684827	0.940196
620	X - 11795	1595	TRUE	-0.779249	0.0992671	-0.141453	0.340939	0.0192474	-0.0633385	0.022091	-0.121791	0.009128	0.0122428	0.000224854	0.173939	0.0190851	0.0151675	0.799827	0.405186	0.79052	0.137739	0.00192289	0.0295711	0.684827	0.371908
332	gamma-glutamyl-2-aminobutyrate	1595	TRUE	-1.43493	0.0995165	0.0272452	-0.102927	0.0735221	-0.0675701	-0.137047	0.056293	0.0216995	0.0116802	1.35936e-11	0.174855	0.65317	0.465568	0.334985	0.37675	0.10094	0.494688	2.13853e-13	0.03881	0.68485	0.907897
345	gamma-glutamylvaline	1595	TRUE	-2.07458	0.0980515	0.0641281	0.0204589	0.00289296	-0.117405	-0.119399	0.073068	0.023643	0.0333866	5.71206e-23	0.177229	0.285698	0.883601	0.969455	0.12109	0.149162	0.370959	6.90005e-16	2.50063e-09	0.687918	0.715014
597	X - 11261	1595	TRUE	-1.81925	0.0970421	-0.0891996	0.24693	-0.160297	-0.088663	-0.110862	-0.0189301	0.00769546	0.0586436	2.35315e-18	0.177468	0.133713	0.0743495	0.0321423	0.237115	0.176201	0.81493	0.00797149	3.91982e-26	0.687918	0.563485
587	valine	1595	TRUE	-2.77361	0.0943277	-0.0189508	-0.0445852	-0.137541	-0.266257	-0.149383	-0.190798	0.0280666	0.0574868	1.43022e-42	0.178469	0.743658	0.740867	0.0591596	0.000268425	0.061397	0.0154561	3.00822e-23	1.95311e-26	0.688251	0.949458
677	X - 16580	1595	TRUE	-1.75736	0.0990079	0.00128385	-0.0586196	0.0963114	0.222064	0.0701196	0.199753	0.0196203	0.0241362	1.80579e-16	0.179559	0.983203	0.679451	0.20921	0.00387383	0.404021	0.0159841	4.15003e-11	2.1838e-05	0.688921	0.994465
664	X - 14939	1595	TRUE	0.404703	0.0987683	-0.0839824	0.247253	-0.0510938	0.0383624	-0.0580493	0.0606296	-0.0213557	0.0271316	0.058572	0.181741	0.169542	0.0821388	0.506395	0.618715	0.4908	0.465766	7.85132e-13	1.93813e-06	0.693751	0.609557
598	X - 11299	1595	TRUE	-0.691259	0.0992326	-0.0275999	-0.0845233	-0.0918434	-0.0312113	0.0450117	-0.0248059	0.01249	0.00266701	0.00140257	0.184663	0.655349	0.556828	0.23764	0.688916	0.597329	0.767957	3.43659e-05	0.643655	0.698395	0.907897
516	pseudouridine	1595	TRUE	-2.23113	0.0960543	-0.0265376	0.0890857	0.0833409	0.0392907	0.14292	-0.0256939	0.0237632	0.0370203	1.80329e-26	0.184815	0.657613	0.522468	0.268442	0.60275	0.0832436	0.752296	3.97824e-16	3.32587e-11	0.698395	0.907897
656	X - 13529	1595	TRUE	-2.65049	0.0922106	0.0165261	0.0646003	-0.124044	-0.263955	-0.170941	-0.117033	0.023371	0.0611322	9.93256e-39	0.190183	0.776384	0.633182	0.0900681	0.000320572	0.0330031	0.139036	1.75546e-16	1.86762e-29	0.704369	0.961691
343	gamma-glutamylthreonine	1595	TRUE	-1.00984	0.0977732	0.0256152	-0.264224	0.0135057	-0.128644	0.00647402	-0.00482731	0.0179937	0.00332484	2.94685e-06	0.190417	0.678154	0.0657672	0.861895	0.0983376	0.93933	0.954131	2.25394e-09	0.563453	0.704369	0.918869
12	1-(1-enyl-palmitoyl)-GPE (P-16:0)*	1595	TRUE	-0.891572	0.096461	0.0727287	0.0397249	0.0322377	0.0227931	0.00270847	0.147737	0.0154261	0.000545609	3.20016e-05	0.19302	0.235108	0.780428	0.675631	0.767902	0.974403	0.0760847	2.40893e-07	0.923892	0.704369	0.668404
5	1-(1-enyl-palmitoyl)-2-docosahexaenoyl-GPE (P-16:0/22:6)*	1595	TRUE	-1.4467	0.0951927	-0.00922962	-0.102562	0.0208637	-0.008635	-0.0932174	-0.102643	0.0296489	-0.00210027	8.10621e-12	0.193108	0.878673	0.46591	0.783811	0.909815	0.263213	0.211809	8.58291e-24	0.709469	0.704369	0.973719
534	sphingomyelin (d18:1/14:0, d16:1/16:0)*	1595	TRUE	-2.7914	-0.0893223	0.0797187	-0.2137	-0.0182638	0.00554078	-0.0892615	-0.122659	0.041977	0.0270775	1.26603e-44	0.194491	0.161275	0.106504	0.7986	0.938449	0.255027	0.112916	1.07347e-51	3.34088e-07	0.704369	0.604092
270	betonicine	1595	TRUE	-0.827148	-0.0969787	-0.0246519	-0.128718	0.0464521	0.0357341	0.173064	0.0376733	0.0165708	-0.0019357	0.00013442	0.195282	0.69043	0.371381	0.550723	0.647038	0.0424568	0.654406	4.01067e-08	0.737314	0.704369	0.921689
251	alpha-hydroxyisovalerate	1595	TRUE	-0.963669	0.0945436	-0.133422	0.164385	-0.0958799	-0.196479	-0.0817544	-0.0822782	0.00201958	0.0369898	5.27944e-06	0.196226	0.0273565	0.242602	0.207441	0.00996645	0.32654	0.316957	0.493389	5.35492e-11	0.704369	0.384377
325	erythritol	1595	TRUE	-2.65296	0.0902222	-0.0108316	-0.0709711	-0.0767227	-0.182116	-0.138842	-0.0309324	0.04169	0.0230242	4.5406e-39	0.198281	0.851784	0.598727	0.292694	0.0127182	0.0822098	0.694734	3.15259e-49	2.04686e-05	0.704369	0.963221
354	glycerate	1595	TRUE	-0.560788	-0.0953861	0.0576594	-0.471083	0.0537043	-0.138413	0.000324961	-0.0290703	0.0206449	-0.0178942	0.00895268	0.19836	0.346911	0.000955587	0.486088	0.0733217	0.996931	0.72725	4.95769e-12	0.00174307	0.704369	0.75398
129	1-stearoyl-2-linoleoyl-GPE (18:0/18:2)*	1595	TRUE	-1.44016	0.0953539	0.128702	0.0789778	-0.00736011	-0.0336227	0.0326349	-0.144457	0.0121747	0.0316027	1.94741e-11	0.198695	0.0358468	0.57987	0.92398	0.663678	0.699365	0.0831852	4.67299e-05	3.25637e-08	0.704369	0.41318
697	X - 18913	1595	TRUE	-0.917764	0.0962598	0.0526166	-0.129728	-0.213669	-0.246589	-0.146118	-0.158615	0.0156112	0.00996101	2.36237e-05	0.199564	0.39629	0.368655	0.00616687	0.00161601	0.0873626	0.060006	2.44979e-07	0.085002	0.704369	0.796761
179	3-(4-hydroxyphenyl)lactate	1595	TRUE	-2.18767	0.0915084	-0.0147939	0.118276	-0.0772037	-0.121907	-0.0205193	-0.113167	0.0188486	0.049039	3.1609e-26	0.199816	0.802011	0.388847	0.298162	0.10126	0.800744	0.158322	5.6854e-11	4.89279e-19	0.704369	0.961691
255	anthranilate	1595	TRUE	-0.761709	0.0951739	0.101037	0.0681832	0.12496	0.0211285	0.0232587	0.243649	0.00645627	0.0118962	0.000406962	0.201243	0.100728	0.633996	0.106536	0.78545	0.783939	0.00360153	0.0314812	0.0382002	0.704369	0.511277
589	vanillylmandelate (VMA)	1595	TRUE	-1.90215	0.0920395	0.122569	0.0691579	0.076429	0.0937651	0.0729253	0.169125	0.0375541	-0.00607947	6.98079e-20	0.201328	0.0395382	0.61759	0.307458	0.211667	0.374108	0.0366967	2.85743e-38	0.273468	0.704369	0.416536
670	X - 15503	1595	TRUE	-2.69922	0.0908298	-0.0426524	0.104427	-0.0503372	-0.0197537	-0.0631584	0.0286938	0.0325555	0.0405383	2.46849e-39	0.20145	0.46803	0.445032	0.495916	0.789807	0.435504	0.719547	6.64921e-30	1.38742e-13	0.704369	0.824699
744	X - 24240	1595	TRUE	-1.91812	0.0927035	0.0489516	-0.010345	-0.0134912	-0.170533	-0.114	0.0155386	0.0273581	0.020889	7.05556e-20	0.201913	0.414963	0.940969	0.85823	0.0242984	0.168302	0.849059	9.32172e-21	0.00019072	0.704369	0.806336
750	X - 24425	1595	TRUE	-1.02881	0.0951625	0.0225194	-0.0816013	-0.209108	-0.149934	-0.187773	-0.0119095	0.0154784	0.0130463	2.093e-06	0.204243	0.716272	0.571325	0.00729128	0.0549564	0.0278637	0.887579	3.00435e-07	0.0239255	0.704369	0.930287
689	X - 17185	1595	TRUE	0.222395	0.0953158	0.00547528	0.0897008	-0.0455189	-0.151541	-0.16359	-0.21425	0.0020986	-0.00923496	0.30672	0.205028	0.929819	0.535117	0.560472	0.053197	0.0561869	0.0112541	0.488752	0.111107	0.704369	0.980551
126	1-stearoyl-2-docosapentaenoyl-GPC (18:0/22:5n3)*	1595	TRUE	-1.82537	-0.0916863	0.0739564	0.116472	0.00620427	-0.0534877	-0.0697465	-0.213154	0.0285258	0.0160001	4.25297e-18	0.207621	0.218824	0.405167	0.934633	0.480592	0.400038	0.00914369	2.31387e-22	0.00432681	0.704369	0.658154
267	beta-alanine	1595	TRUE	-0.702256	0.0941253	0.0109319	0.0402486	-0.0277194	-0.204246	-0.0904	-0.212398	-0.00227579	0.0354372	0.00115728	0.207699	0.859491	0.779359	0.721181	0.00871138	0.288096	0.0114176	0.449783	7.52211e-10	0.704369	0.966125
668	X - 15492	1595	TRUE	-2.6316	0.0876394	-0.0408355	0.213938	-0.10841	-0.0600624	-0.0370467	-0.0327377	0.0226431	0.0583461	7.11221e-39	0.208939	0.478782	0.110713	0.134923	0.408674	0.641008	0.676225	8.0011e-16	1.91289e-27	0.704369	0.827688
365	glycolithocholate sulfate*	1595	TRUE	0.192876	0.094182	0.0610214	-0.00546804	0.0843531	0.114235	0.0749614	-0.0599918	0.0015667	-0.0133839	0.374218	0.209368	0.325153	0.969768	0.27952	0.144042	0.380413	0.476802	0.604403	0.0206343	0.704369	0.736491
392	indolepropionate	1595	TRUE	0.615936	-0.0931679	0.0761155	0.0818995	-0.0103939	-0.0317812	0.0639153	-0.036182	0.000284234	-0.0247222	0.00412928	0.20944	0.214803	0.566151	0.892867	0.681224	0.449707	0.664513	0.924316	1.55123e-05	0.704369	0.656634
206	4-acetamidobutanoate	1595	TRUE	-2.28021	0.0891375	0.026071	-0.00720301	0.00240308	0.133483	-0.033375	0.161645	0.0381923	0.00921507	1.35229e-28	0.20963	0.657108	0.957956	0.974048	0.0714477	0.680054	0.0429394	1.41954e-40	0.0924011	0.704369	0.907897
323	ergothioneine	1595	TRUE	-0.0465533	-0.0938273	-0.0846665	-0.353411	-0.00206203	-0.0811344	-0.0342807	-0.17348	0.0101279	-0.0150673	0.829708	0.209812	0.170997	0.0140361	0.978851	0.298109	0.687502	0.0391031	0.000783752	0.00897445	0.704369	0.609557
61	1-linoleoyl-GPC (18:2)	1595	TRUE	0.719229	-0.0922308	0.137166	0.0149983	0.0814097	0.0232246	-0.0378952	-0.159376	0.00524417	-0.0389831	0.000743485	0.210804	0.0243614	0.915727	0.288058	0.762395	0.65172	0.0543561	0.0775196	6.75819e-12	0.704554	0.371908
70	1-methyl-4-imidazoleacetate	1595	TRUE	-1.69281	0.0910129	-0.0124357	0.140307	-0.0304006	-0.0876999	-0.0313197	-0.110708	0.0257226	0.0157377	1.23618e-15	0.213331	0.837021	0.318458	0.68929	0.249906	0.706946	0.178019	2.6366e-18	0.00523675	0.705503	0.961691
654	X - 12847	1595	TRUE	1.16711	-0.0919106	-0.00556208	0.199373	-0.0441832	0.0988681	-0.0205737	-0.12943	-0.0213093	-0.00197413	4.98444e-08	0.214205	0.927546	0.161189	0.565759	0.19985	0.807164	0.119635	9.02191e-13	0.729225	0.705503	0.980551
103	1-palmitoyl-2-linoleoyl-GPE (16:0/18:2)	1595	TRUE	-1.15197	0.092469	0.0962252	-0.0459233	0.0193034	-0.0109899	0.0295491	-0.124338	0.012268	0.0200569	1.01039e-07	0.216248	0.11954	0.749462	0.80391	0.887861	0.728662	0.139023	4.69624e-05	0.000501157	0.705503	0.556958
399	isovalerylcarnitine (C5)	1595	TRUE	-2.31063	0.0869623	0.0434852	-0.0657717	-0.184199	-0.112081	-0.0908042	-0.0869634	0.0283626	0.0356571	8.6174e-30	0.217062	0.455234	0.627339	0.0119093	0.126894	0.257828	0.272066	1.71557e-23	5.12981e-11	0.705503	0.824699
229	5alpha-pregnan-3beta,20beta-diol monosulfate (1)	1595	TRUE	2.51739	-0.084962	-0.0890231	0.00961495	0.0944226	0.0802009	0.223591	0.154034	-0.0495145	-0.00167088	1.4678e-36	0.217552	0.118051	0.942153	0.187479	0.264076	0.00438844	0.0466934	4.23073e-71	0.753032	0.705503	0.556958
594	X - 09789	1595	TRUE	-0.783033	-0.0905033	-0.0564394	-0.0552989	-0.0288605	0.0132399	-0.000915225	-0.057018	0.0237487	-0.0160426	0.000230555	0.218137	0.352853	0.695584	0.705635	0.862763	0.991277	0.489989	1.07986e-15	0.00461985	0.705503	0.760302
472	oleoyl ethanolamide	1595	TRUE	-1.80718	-0.0895632	-0.0654526	-0.305456	-0.227054	-0.158358	0.0238292	0.0559252	0.027297	0.0199778	1.1884e-17	0.220027	0.278234	0.029621	0.00278456	0.0374645	0.774518	0.495616	1.79376e-20	0.000385783	0.705503	0.711028
462	N-formylmethionine	1595	TRUE	-0.949861	0.0908549	-0.0419883	0.0681425	-0.00473257	0.0610141	0.00383509	-0.0688032	0.0164619	0.00355443	1.02208e-05	0.222079	0.494827	0.633921	0.95122	0.431422	0.96391	0.410663	4.04608e-08	0.535386	0.705503	0.838717
302	cystine	1595	TRUE	-0.463206	-0.0912389	-0.0834798	0.372296	-0.164858	0.091368	-0.0777815	-0.120321	0.00209917	0.0164396	0.0325399	0.223158	0.177541	0.00974316	0.0342506	0.241811	0.361927	0.152899	0.486835	0.00440036	0.705503	0.610511
22	1,2-dimyristoyl-GPC (14:0/14:0)	1595	TRUE	-1.03488	-0.0897946	0.00538535	-0.25211	-0.0472056	-0.184664	-0.138273	-0.201974	0.0189914	0.00782353	1.29667e-06	0.224359	0.929754	0.0760758	0.538971	0.0165083	0.100478	0.01503	1.82303e-10	0.169579	0.705503	0.980551
1	1-(1-enyl-oleoyl)-GPE (P-18:1)*	1595	TRUE	-0.680039	0.0902872	0.0470962	0.0742797	0.0653148	0.0116039	0.0332517	0.170459	0.0135446	-0.00433788	0.0015688	0.224597	0.443479	0.603388	0.39812	0.880959	0.694586	0.0413519	6.18709e-06	0.449022	0.705503	0.824699
43	1-arachidoyl-GPC (20:0)	1595	TRUE	1.34812	-0.0886736	0.092097	0.0485934	0.0715082	0.0331713	-0.0799297	-0.0847575	0.00116412	-0.0558344	2.08163e-10	0.226531	0.128639	0.730378	0.348232	0.66424	0.338569	0.303711	0.693659	5.0702e-23	0.705503	0.563485
511	proline	1595	TRUE	-1.67577	0.0884698	-0.0293363	0.0861876	-0.0562451	-0.1969	-0.0764233	-0.186414	0.0178383	0.033061	2.65252e-15	0.22722	0.628095	0.540709	0.460265	0.00991825	0.359791	0.0235785	1.53402e-09	4.76562e-09	0.705503	0.907897
256	arabitol/xylitol	1595	TRUE	-2.07759	0.0868388	-0.0652312	-0.118454	-0.074302	-0.140034	-0.0578469	-0.0852008	0.0343013	0.0146897	1.77895e-23	0.22729	0.272562	0.391764	0.320398	0.0617499	0.480139	0.291879	2.66239e-32	0.00804845	0.705503	0.708818
542	sphingomyelin (d18:2/14:0, d18:1/14:1)*	1595	TRUE	-4.03588	-0.0778153	0.0814337	-0.187661	0.0430403	0.0113341	-0.114013	-0.0244574	0.043089	0.0728158	1.03278e-103	0.22771	0.126722	0.130342	0.52104	0.866127	0.120756	0.735861	1.11027e-61	1.42861e-48	0.705503	0.563485
335	gamma-glutamylglutamate	1595	TRUE	-1.77575	0.0880763	0.0819631	-0.0545226	0.0572109	-0.0597206	0.013845	0.200033	0.0225048	0.0210448	4.67669e-17	0.228372	0.175073	0.698197	0.451703	0.433234	0.867976	0.014927	2.23862e-14	0.000188134	0.705503	0.609557
475	ornithine	1595	TRUE	-1.6655	0.0872234	-0.045042	0.079849	-0.0313345	-0.224894	0.0702572	-0.0661887	0.0281302	0.0102741	1.97034e-15	0.228793	0.452154	0.566706	0.677525	0.00290817	0.394756	0.416464	6.00108e-22	0.0658677	0.705503	0.824699
287	cinnamoylglycine	1595	TRUE	-0.215387	0.0878831	-0.0403091	-0.356272	-0.0807626	-0.0183025	0.00536958	0.0878376	0.0212485	-0.0332719	0.308549	0.229365	0.504799	0.0112798	0.288029	0.810186	0.948593	0.285098	5.583e-13	3.53597e-09	0.705503	0.840072
479	oxalate (ethanedioate)	1595	TRUE	-0.746885	-0.0887847	-0.00563377	-0.273053	0.039502	0.0102819	0.14669	-0.0559186	0.0209125	-0.0124553	0.00048329	0.230071	0.926594	0.0549337	0.607528	0.89391	0.0817153	0.501222	2.32284e-12	0.0289186	0.705503	0.980551
189	3-hydroxylaurate	1595	TRUE	-1.49678	-0.0875616	-0.0241723	-0.221876	-0.238935	-0.225974	-0.134093	-0.105581	0.0256599	0.0136597	1.50151e-12	0.231196	0.689266	0.11465	0.00167551	0.00302976	0.107469	0.198959	3.17795e-18	0.0153732	0.705503	0.921689
603	X - 11381	1595	TRUE	-1.7472	0.0885668	-0.044762	0.0884141	0.0866707	0.120685	-0.102364	0.0153172	0.0201124	0.0266221	4.03526e-16	0.232728	0.465611	0.535593	0.261331	0.118701	0.225949	0.8543	1.77453e-11	3.25083e-06	0.705503	0.824699
478	O-sulfo-L-tyrosine	1595	TRUE	-1.52511	0.0882016	0.126025	0.0570138	0.0773881	0.0821001	0.132559	0.129184	0.0238678	0.00648188	1.00398e-12	0.232896	0.0392054	0.688429	0.314061	0.286685	0.115495	0.120038	1.15647e-15	0.255329	0.705503	0.416536
135	1-stearoyl-GPE (18:0)	1595	TRUE	-1.52812	0.0882603	0.177653	0.0649715	0.00969972	-0.0118282	0.069936	-0.00234872	0.0232524	0.0107012	9.63501e-13	0.233137	0.00369207	0.64809	0.899705	0.878151	0.406867	0.977478	6.52729e-15	0.0606915	0.705503	0.194881
672	X - 16071	1595	TRUE	-1.20364	0.0880364	0.0529155	0.375783	-0.00734266	0.140245	-0.077002	0.20338	0.0101238	0.0229755	1.8113e-08	0.233604	0.386426	0.00819577	0.923874	0.0686623	0.360387	0.0143504	0.000678003	5.49725e-05	0.705503	0.785385
558	tartarate	1595	TRUE	-0.368909	-0.0884593	-0.0744828	-0.300557	-0.0913429	-0.184787	-0.0921803	-0.217057	0.0167909	-0.0125252	0.0869661	0.235082	0.226482	0.0359156	0.238283	0.0173189	0.277371	0.00953294	2.24865e-08	0.0291532	0.707126	0.66118
421	methionine sulfone	1595	TRUE	-1.25331	0.0863522	0.063031	0.0992728	-0.14279	-0.0797971	-0.0402387	-0.120768	0.0303682	-0.0100928	2.92219e-09	0.236731	0.296113	0.479357	0.0598566	0.29414	0.628363	0.140928	5.51358e-25	0.0727581	0.708056	0.717539
183	3-hydroxy-2-ethylpropionate	1595	TRUE	-2.00379	0.0849825	-0.061527	-0.243177	-0.139684	-0.252633	-0.167745	-0.0652248	0.0288062	0.0256482	7.31523e-22	0.238395	0.301771	0.0793667	0.0623271	0.000771226	0.0410455	0.420736	3.57576e-23	3.89403e-06	0.708056	0.717539
548	stachydrine	1595	TRUE	-0.515148	-0.0886026	0.00447889	-0.132151	0.0653194	0.0138826	0.0840497	-0.0261244	0.0136831	-0.00780575	0.0178916	0.238713	0.942561	0.360815	0.403464	0.859409	0.326492	0.757247	6.35334e-06	0.178046	0.708056	0.982935
180	3,7-dimethylurate	1595	TRUE	-1.00168	0.0878235	-0.0968429	-0.113292	-0.0893235	0.00991512	-0.0460538	0.151324	0.00482887	0.0304382	3.59826e-06	0.239895	0.116933	0.430482	0.250263	0.898696	0.588478	0.0715799	0.108887	1.25666e-07	0.708056	0.55654
626	X - 11905	1595	TRUE	-0.491804	0.0875832	0.0323191	0.01325	-0.0657871	-0.0613292	-0.0812765	0.0927871	0.00777448	0.00370551	0.0228691	0.24103	0.600709	0.926512	0.396973	0.430866	0.339501	0.269094	0.00982252	0.519831	0.708056	0.903467
283	cholate	1595	TRUE	-0.813497	0.0875407	0.050973	0.1129	0.100202	-0.0231496	-0.0447364	-0.0713358	0.00944771	0.0114229	0.000166954	0.241224	0.409074	0.431893	0.196967	0.766196	0.599044	0.395482	0.00170132	0.0472357	0.708056	0.803194
502	phosphatidylcholine (18:0/20:5, 16:0/22:5n6)*	1595	TRUE	-2.10909	0.0842931	-0.0230513	0.0219913	0.0836125	0.0226392	-0.0564583	0.000598901	0.033067	0.0153487	5.17001e-24	0.24258	0.699058	0.874036	0.264895	0.763313	0.492005	0.994106	5.68831e-30	0.00576503	0.708056	0.921689
704	X - 21343	1595	TRUE	-1.2161	-0.0860768	-0.116443	-0.251177	-0.238073	-0.0919194	-0.108095	-0.138065	0.0216238	0.0102763	1.28178e-08	0.244083	0.0566111	0.0771352	0.00194301	0.232668	0.199071	0.0964294	3.86848e-13	0.0711719	0.708056	0.446856
541	sphingomyelin (d18:1/24:1, d18:2/24:0)*	1595	TRUE	-1.04732	-0.0877296	-0.00853153	-0.14777	-0.0181981	-0.0945034	0.260476	-0.0718532	0.0206074	0.000223745	1.61805e-06	0.245124	0.891238	0.308665	0.816619	0.229638	0.00244923	0.396996	1.2572e-11	0.96932	0.708056	0.975004
469	octadecanedioate	1595	TRUE	-0.407392	0.0871998	0.0456284	-0.120518	-0.0564272	-0.110127	-0.0343695	-0.0143477	0.0138982	-0.0111863	0.0612018	0.246361	0.46306	0.404764	0.470591	0.160105	0.688331	0.865237	4.56243e-06	0.0536646	0.708056	0.824699
362	glycocholate	1595	TRUE	0.522826	0.0877792	0.0742766	0.191961	-0.0654159	-0.0676184	-0.0847766	-0.138955	-0.00652854	-0.00612616	0.0171878	0.247144	0.236135	0.188145	0.40679	0.392337	0.326466	0.103086	0.0327189	0.294641	0.708056	0.668404
712	X - 21666	1595	TRUE	-0.649588	0.0862734	-0.0413878	0.166948	-0.0373289	-0.0922846	0.0550543	-0.0348071	-0.00149094	0.0289041	0.00259774	0.247192	0.501849	0.24424	0.630097	0.234961	0.516799	0.677845	0.619785	4.89491e-07	0.708056	0.839365
140	2-aminoadipate	1595	TRUE	-2.22268	0.080667	-0.00359075	0.123832	-0.0945351	-0.168214	-0.216703	-0.221136	0.0258582	0.0384602	3.37785e-28	0.247631	0.950358	0.356063	0.192513	0.0207127	0.00639913	0.00480311	3.76291e-20	8.54806e-13	0.708056	0.985751
250	alpha-hydroxyisocaproate	1595	TRUE	-0.728734	0.0845186	-0.0996598	0.0141821	-0.237745	-0.243953	-0.155562	-0.210236	0.0073572	0.0198709	0.000585345	0.248634	0.0998276	0.919815	0.00180009	0.00139816	0.0623007	0.0106689	0.0127186	0.000432641	0.70823	0.511277
508	pregnenediol disulfate (C21H34O8S2)*	1595	TRUE	1.08659	0.0843771	-0.0780373	-0.148803	-0.0119802	-0.000946928	0.0484916	-0.0478878	-0.0234671	0.00435763	3.29679e-07	0.251383	0.199377	0.292858	0.875528	0.990146	0.562794	0.562447	2.4823e-15	0.442131	0.712441	0.63818
200	3-methylglutarylcarnitine (1)	1595	TRUE	-1.90081	0.0836714	0.0747675	0.284452	0.0220409	0.109248	0.0508154	0.179553	0.0181062	0.0333068	2.5171e-19	0.252372	0.215961	0.0430233	0.771809	0.15159	0.541683	0.0288538	7.98792e-10	3.38293e-09	0.712441	0.6575
628	X - 12063	1595	TRUE	-3.37269	0.0758709	0.0937011	-0.00572585	0.028399	0.0664372	0.0299509	0.0767818	0.0129926	0.10313	5.14602e-69	0.253162	0.0877739	0.964231	0.680779	0.337015	0.692092	0.303508	1.2045e-06	2.49539e-90	0.712441	0.490482
87	1-oleoyl-GPE (18:1)	1595	TRUE	-0.183299	0.0861191	0.102674	0.0986253	-0.102641	-0.14848	-0.177664	-0.165838	0.00632233	-0.00243765	0.401252	0.253902	0.0998521	0.496853	0.190902	0.0591071	0.0387962	0.0505993	0.0377025	0.675198	0.712441	0.511277
606	X - 11440	1595	TRUE	0.50122	0.0842856	-0.0623839	-0.0608981	0.0502106	-0.00226245	0.0302771	-0.0176876	-0.0180737	0.0154954	0.0196904	0.256542	0.309667	0.669896	0.515619	0.976688	0.720486	0.832222	1.57782e-09	0.00680023	0.717172	0.717539
410	linoleate (18:2n6)	1595	TRUE	-1.41609	-0.0830603	-0.0266602	-0.271006	-0.254278	-0.249882	-0.0745399	-0.00294489	0.0264314	0.00812478	2.53172e-11	0.257596	0.660233	0.0547587	0.000857607	0.00108371	0.372438	0.971511	3.96683e-19	0.150761	0.717453	0.909332
417	mannitol/sorbitol	1595	TRUE	-1.16722	0.0840533	-0.0535136	0.179324	-0.0564837	-0.0463504	0.0333727	0.00856581	0.013648	0.018566	6.21309e-08	0.259486	0.385127	0.210939	0.466103	0.550764	0.694287	0.918562	5.55803e-06	0.00123055	0.717728	0.784866
35	16-hydroxypalmitate	1595	TRUE	-0.897528	-0.0837528	-0.00354903	-0.0925995	-0.291734	-0.276977	-0.247017	-0.210816	0.0176493	0.00857617	2.96865e-05	0.259604	0.953915	0.516892	0.000158759	0.000347392	0.00351223	0.011576	3.77076e-09	0.134183	0.717728	0.987783
447	N-acetylglutamine	1595	TRUE	-0.63624	-0.0837981	-0.143849	0.182763	-0.0293736	-0.0607826	-0.0246372	-0.000572852	0.0119874	0.00291853	0.00315484	0.260628	0.0194875	0.202026	0.70449	0.433691	0.771549	0.994541	6.54089e-05	0.611212	0.71792	0.371908
379	histidine	1595	TRUE	-0.998289	0.0828672	-0.0552202	-0.348769	-0.0496032	-0.103091	0.0278683	-0.276959	0.0164571	0.00946329	3.6664e-06	0.266243	0.370127	0.0149663	0.522116	0.184493	0.742735	0.000946026	4.30643e-08	0.0994904	0.730712	0.773155
339	gamma-glutamylisoleucine*	1595	TRUE	-2.36243	0.0789682	0.0293138	0.0457775	-0.046356	-0.187091	-0.131116	0.0450183	0.0277242	0.0380277	4.26266e-30	0.270344	0.6206	0.739681	0.533702	0.0122212	0.108117	0.576085	7.90828e-22	5.68712e-12	0.737584	0.907897
85	1-oleoylglycerol (18:1)	1595	TRUE	-2.44264	0.0784079	0.168717	0.10775	-0.0411623	-6.92148e-06	0.205616	0.144535	0.0243973	0.042068	2.31e-32	0.271373	0.00419381	0.431864	0.578628	0.999926	0.0113346	0.0712275	2.04697e-17	1.90317e-14	0.737584	0.197109
560	taurine	1595	TRUE	-0.395494	0.0824113	-0.0920305	-0.258978	-0.0253319	-0.209579	0.191022	0.0815277	0.00896608	-0.00150279	0.0684735	0.272075	0.137874	0.0726916	0.745396	0.00736426	0.0254223	0.333671	0.003031	0.79497	0.737584	0.563485
260	arginine	1595	TRUE	-1.57143	0.080458	-0.0340125	-0.062897	-0.126304	-0.0726741	-0.0279298	-0.162196	0.0204464	0.0236765	1.40272e-13	0.273279	0.575296	0.656067	0.0980943	0.342385	0.738479	0.0494077	4.94197e-12	2.87665e-05	0.737584	0.900902
214	4-guanidinobutanoate	1595	TRUE	-1.26137	0.0817569	0.0707076	-0.103404	-0.0483662	-0.155166	-0.16941	-0.0855208	0.0147904	0.0218468	5.2865e-09	0.273651	0.252072	0.471543	0.533356	0.0462134	0.0464394	0.308271	8.95497e-07	0.000147357	0.737584	0.681864
687	X - 17178	1595	TRUE	0.264747	-0.0825864	-0.0638035	0.0145442	0.0502227	-0.10352	-0.0957291	-0.0396333	0.000923077	-0.00976267	0.226235	0.274795	0.307405	0.920335	0.522965	0.189031	0.26643	0.640988	0.762012	0.0939235	0.738021	0.717539
676	X - 16570	1595	TRUE	-0.541197	0.0813536	-0.0939219	0.118981	-0.00211784	0.0176759	0.0361546	0.194808	0.000242411	0.0195711	0.012229	0.275893	0.128065	0.407299	0.978234	0.820309	0.670759	0.0202598	0.9358	0.00067125	0.738268	0.563485
573	thyroxine	1595	TRUE	-1.14325	-0.0809065	-0.0462071	-0.0688288	-0.100649	-0.0325683	-0.114821	-0.0772256	0.0144441	0.0197688	1.15415e-07	0.277821	0.453378	0.631166	0.194106	0.675106	0.176348	0.356704	1.53365e-06	0.000580524	0.738268	0.824699
26	1,5-anhydroglucitol (1,5-AG)	1595	TRUE	0.257799	0.0813411	0.0454012	-0.00425908	0.0395364	0.0437899	-0.00965772	-0.00977156	-0.00735264	0.00265706	0.234498	0.277832	0.463701	0.976428	0.611915	0.575105	0.909939	0.907657	0.0149444	0.64555	0.738268	0.824699
513	prolylproline	1595	TRUE	-1.01354	0.0804644	0.199206	-0.180398	-0.0498222	0.0766698	-0.0971349	0.082139	0.00333912	0.0313385	2.56641e-06	0.280092	0.00121669	0.207943	0.520051	0.323407	0.252338	0.326571	0.266116	4.80803e-08	0.740849	0.194881
579	tryptophan	1595	TRUE	-1.05792	0.0799805	0.0444901	-0.0281388	-0.103663	-0.224279	-0.162595	-0.25257	0.017695	0.010497	8.65939e-07	0.281894	0.468984	0.843931	0.179765	0.00378867	0.0547956	0.0024985	3.49322e-09	0.066883	0.740849	0.824699
359	glycerophosphorylcholine (GPC)	1595	TRUE	0.0427075	-0.0804539	0.0390987	0.132641	0.202479	0.0545779	0.0278132	-0.0139688	0.00846595	-0.0209946	0.843667	0.282478	0.527472	0.356831	0.00927736	0.484203	0.744283	0.868128	0.00501777	0.000273645	0.740849	0.864484
273	biliverdin	1595	TRUE	0.733386	-0.0799746	0.0419526	-0.115648	-0.0030631	-0.175008	-0.0553295	-0.0574975	0.00174516	-0.0298251	0.00067242	0.283352	0.495986	0.419825	0.968474	0.0242884	0.514662	0.492541	0.561365	2.08932e-07	0.740849	0.838717
409	leukotriene B4	1595	TRUE	-0.60587	0.07994	0.0130135	0.152859	0.185764	0.0829626	-0.06457	0.30054	0.00212498	0.0144918	0.00497992	0.283729	0.8328	0.286458	0.0165753	0.285774	0.447165	0.00033592	0.479583	0.0116858	0.740849	0.961691
631	X - 12127	1595	TRUE	-0.975496	0.0794381	-0.0799165	0.141346	0.0152577	0.0273576	0.0499263	0.0469203	0.00548783	0.0260313	5.86452e-06	0.285742	0.193874	0.323286	0.843662	0.72428	0.555857	0.574784	0.0673006	5.65501e-06	0.741161	0.633884
13	1-(1-enyl-stearoyl)-2-arachidonoyl-GPC (P-18:0/20:4)	1595	TRUE	0.37825	0.0798902	0.00268223	-0.200938	-0.0386216	-0.17657	-0.204968	-0.218006	0.00552428	-0.0216003	0.0807905	0.285997	0.965434	0.162872	0.619814	0.0236618	0.0162545	0.00958245	0.0671869	0.000181839	0.741161	0.990032
249	alpha-glutamylglycine	1595	TRUE	-0.543386	-0.0799849	-0.0818902	0.00409872	0.0202697	-0.0539111	0.11915	0.0399417	0.00684951	0.00800036	0.0126069	0.288075	0.188241	0.977416	0.795676	0.492062	0.164736	0.636911	0.0240029	0.167975	0.741161	0.629143
76	1-myristoylglycerol (14:0)	1595	TRUE	-2.67249	0.0757948	0.162602	0.02605	-0.0171988	-0.0601165	0.0777576	0.0838708	0.0304816	0.0409468	3.12464e-38	0.288806	0.00590642	0.849639	0.816918	0.419528	0.339402	0.296312	3.54806e-26	1.04279e-13	0.741161	0.230257
661	X - 14314	1595	TRUE	-1.08034	0.0798282	-0.0374653	-0.165698	-0.0710917	-0.111522	0.0254275	0.00879931	0.0150566	0.0139178	7.3866e-07	0.289888	0.547903	0.2533	0.364634	0.155999	0.767263	0.917327	7.32228e-07	0.0166561	0.741161	0.889899
358	glycerophosphoinositol*	1595	TRUE	0.0741566	0.0783533	0.00645402	0.241015	0.0602871	0.124324	0.0472863	0.0597156	0.00161179	-0.00908354	0.730214	0.29184	0.916345	0.09178	0.435333	0.108541	0.576519	0.474733	0.590599	0.112834	0.741161	0.980551
495	phenylalanylphenylalanine	1595	TRUE	-1.59409	0.077374	-0.0156393	0.0590063	-0.0415033	-0.0638272	0.00302684	0.0220572	0.0123309	0.0378022	6.1996e-14	0.292021	0.796674	0.676049	0.586693	0.404282	0.971133	0.789263	3.09665e-05	2.39617e-11	0.741161	0.961691
293	cortisol	1595	TRUE	-0.237132	0.0785122	-0.00939219	-0.0585611	0.0262404	0.0760129	0.00111563	0.0511716	0.0132586	-0.0191602	0.272035	0.292753	0.878982	0.683218	0.735201	0.328401	0.989528	0.541775	1.04308e-05	0.000863961	0.741161	0.973719
525	retinol (Vitamin A)	1595	TRUE	-0.940201	0.0782659	0.0792344	-0.00378673	0.059308	0.00308178	0.0382923	-0.117908	0.0205313	-0.00624488	1.29526e-05	0.293615	0.198361	0.97892	0.443994	0.96835	0.651921	0.159204	8.18738e-12	0.276909	0.741161	0.63818
79	1-oleoyl-2-dihomo-linolenoyl-GPC (18:1/20:3)*	1595	TRUE	-1.60319	-0.0773978	-0.0587613	0.142036	0.108155	0.122377	0.151227	0.0632446	0.0116768	0.0367252	6.62336e-14	0.295179	0.336316	0.317805	0.159426	0.112258	0.0725489	0.446595	8.91822e-05	1.15609e-10	0.741161	0.747786
73	1-methylxanthine	1595	TRUE	-0.060676	0.0787594	-0.107801	0.0507139	-0.220042	-0.0878452	-0.155806	-0.143182	0.00540507	-0.00302047	0.78062	0.295617	0.083307	0.726187	0.00494611	0.263024	0.0693099	0.0906899	0.0749498	0.602761	0.741161	0.490437
572	thymol sulfate	1595	TRUE	0.701576	0.0776224	-0.000119086	0.18754	-0.0302663	0.177538	0.0166476	-0.139618	-0.012951	-0.00207547	0.00111917	0.296917	0.998455	0.190033	0.695657	0.0220766	0.844303	0.0950529	1.57631e-05	0.717449	0.741161	0.998455
373	gulonate*	1595	TRUE	-1.44782	-0.0760734	-0.100197	0.0142388	-0.0370851	-0.114234	-0.147357	0.0754158	0.0175381	0.0244775	6.81789e-12	0.296945	0.0965324	0.91914	0.624803	0.132903	0.0761187	0.35757	2.43524e-09	1.33407e-05	0.741161	0.511214
507	pregnanediol-3-glucuronide	1595	TRUE	2.90023	-0.0715422	-0.045672	-0.0196269	0.0429492	0.0901883	0.119261	0.0712666	-0.0506096	-0.0130649	3.0702e-48	0.297647	0.421199	0.881886	0.547585	0.207761	0.127463	0.355949	1.21512e-74	0.0135946	0.741161	0.812464
609	X - 11444	1595	TRUE	-1.80894	0.0754807	0.0131544	0.192495	0.0865301	-0.00642129	0.0503933	-0.0150158	0.0144608	0.0387756	8.90937e-18	0.299915	0.827001	0.16922	0.253032	0.932568	0.543468	0.854416	8.3405e-07	4.86116e-12	0.744344	0.961691
669	X - 15497	1595	TRUE	-2.0734	0.0747965	0.0659971	0.107417	-0.14426	-0.163214	-0.236919	-0.204727	0.0165074	0.0524799	6.69963e-23	0.303842	0.272394	0.442559	0.0564596	0.0313342	0.00424616	0.0122753	1.80129e-08	7.91418e-21	0.745417	0.708818
122	1-stearoyl-2-arachidonoyl-GPI (18:0/20:4)	1595	TRUE	-1.35254	0.075635	0.0143869	0.43305	0.0418232	-0.121784	-0.0154397	-0.0673992	0.0135262	0.0256623	2.21741e-10	0.30462	0.813255	0.00223972	0.58507	0.112745	0.854034	0.415675	5.24295e-06	6.20308e-06	0.745417	0.961691
382	homocitrulline	1595	TRUE	-1.75171	0.074564	0.10556	0.154539	-0.104683	-0.0824758	-0.0948134	-0.0922857	0.0305329	0.00833667	9.56199e-17	0.306139	0.0796623	0.270059	0.167	0.277442	0.253292	0.259762	2.56787e-25	0.137657	0.745417	0.490437
89	1-palmitoleoyl-2-linoleoyl-GPC (16:1/18:2)*	1595	TRUE	-1.31901	0.0741966	0.107985	-0.0906706	0.094847	0.0699229	-0.0112275	-0.0355253	0.0185598	0.0126615	3.5369e-10	0.307306	0.0722647	0.516504	0.209397	0.35595	0.892121	0.663622	2.36253e-10	0.023794	0.745417	0.471922
576	trans-urocanate	1595	TRUE	0.356046	0.0759567	0.04474	-0.199484	0.0858453	0.124542	0.0629098	0.242343	0.00249521	-0.0236622	0.0999615	0.309967	0.469393	0.165571	0.269731	0.110204	0.460377	0.00394863	0.407964	4.06347e-05	0.745417	0.824699
497	phenylalanyltryptophan	1595	TRUE	-1.05695	0.0755175	-0.0120577	-0.242886	-0.11276	-0.0663823	0.0518394	0.0404199	0.0148977	0.0123758	9.54187e-07	0.311051	0.844866	0.0902128	0.1457	0.392883	0.541538	0.629496	7.11758e-07	0.031236	0.745417	0.962573
486	pantothenate	1595	TRUE	-1.83426	0.0735518	-0.0142277	-0.0620853	-0.00272133	-0.0540755	-0.0869943	0.0640057	0.0319329	0.00756681	2.77354e-18	0.311717	0.812864	0.65701	0.971282	0.475463	0.293523	0.43346	1.19609e-27	0.176899	0.745417	0.961691
307	deoxycholate	1595	TRUE	-0.797679	0.0750151	-0.0596549	0.0193123	-0.0165664	-0.125328	-0.0340615	-0.00685067	0.010027	0.0129398	0.000205305	0.312487	0.33121	0.892442	0.830125	0.105432	0.687231	0.934591	0.000809574	0.0237854	0.745417	0.743492
396	isoleucine	1595	TRUE	-2.37674	0.0718421	-0.0584201	0.00464399	-0.230845	-0.311745	-0.190807	-0.264962	0.0275656	0.0452489	7.43005e-31	0.312506	0.320439	0.972917	0.00179963	2.61031e-05	0.0185274	0.000918778	6.94295e-22	1.53473e-16	0.745417	0.732431
155	2-hydroxyhippurate (salicylurate)	1595	TRUE	-0.499021	-0.0754579	0.0229746	0.126559	-0.152177	-0.187101	-0.179786	-0.257661	0.0115796	0.00243985	0.0210372	0.312802	0.710056	0.378678	0.0502394	0.0163343	0.0347489	0.00216471	0.000121582	0.671957	0.745417	0.927018
242	7-methylguanine	1595	TRUE	-1.41515	0.0745922	-0.0241609	0.0407398	-0.0827411	-0.038465	0.0294042	0.0396788	0.0126285	0.0301955	3.63849e-11	0.31288	0.692509	0.7744	0.2816	0.617547	0.726899	0.632895	2.24517e-05	1.15334e-07	0.745417	0.921689
108	1-palmitoyl-2-oleoyl-GPI (16:0/18:1)*	1595	TRUE	-0.781622	0.0749897	-0.0848184	-0.25914	-0.0382788	-0.114226	0.0716822	-0.0536343	0.00193952	0.0289087	0.000281943	0.313493	0.167848	0.0701066	0.620696	0.140726	0.397648	0.521251	0.517784	4.61755e-07	0.745417	0.609557
42	1-arachidonylglycerol (20:4)	1595	TRUE	-1.7317	-0.0743475	0.0938868	0.109277	-0.0520187	0.14665	0.0570667	0.114843	0.0213761	0.0220179	7.72181e-16	0.316862	0.126238	0.444257	0.500569	0.0581805	0.50001	0.168922	9.34121e-13	0.000120002	0.745417	0.563485
246	adrenate (22:4n6)	1595	TRUE	-1.33876	-0.0741431	-0.0387107	-0.024534	-0.205102	-0.239291	-0.0849316	0.0361149	0.016189	0.0245834	4.34884e-10	0.317339	0.527657	0.863389	0.00780048	0.00195831	0.314614	0.664742	6.06448e-08	1.6937e-05	0.745417	0.864484
499	phenylpyruvate	1595	TRUE	-0.17291	-0.0744115	-0.0409427	-0.0143522	-0.163314	-0.186464	-0.05582	-0.230595	0.0049346	0.00262264	0.422989	0.318493	0.506686	0.920302	0.0352185	0.0164644	0.51121	0.00594924	0.100743	0.648251	0.745417	0.840072
51	1-docosapentaenoyl-GPC (22:5n3)*	1595	TRUE	-0.464672	-0.0742661	0.167298	-0.0304381	0.0186249	0.0742371	-0.0459461	-0.0678156	0.0168597	-0.017317	0.0313513	0.319586	0.00667965	0.832008	0.810264	0.339774	0.588794	0.418705	2.07188e-08	0.00260141	0.745417	0.230257
205	3-ureidopropionate	1595	TRUE	0.199832	0.0750918	-0.13401	-0.114096	0.0308123	-0.00154307	-0.0306494	-0.11739	0.004256	-0.0148603	0.361427	0.321115	0.0321896	0.433082	0.695369	0.984393	0.722201	0.167568	0.162969	0.0108463	0.745417	0.404457
458	N-acetyltryptophan	1595	TRUE	-1.25807	0.0734222	0.00830786	0.276082	0.00618116	-0.0619409	-0.139833	0.12011	0.00650975	0.035321	4.47412e-09	0.322002	0.892165	0.0528092	0.936084	0.422762	0.0977543	0.149443	0.0293703	6.34236e-10	0.745417	0.975004
529	sebacate (C10-DC)	1595	TRUE	-0.957952	0.0732286	0.0344822	-0.228999	-0.11015	-0.064288	-0.0641481	0.0623678	0.0239026	-0.00938699	8.91146e-06	0.325921	0.575747	0.110157	0.155238	0.407962	0.449962	0.456615	1.78533e-15	0.102277	0.745417	0.900902
222	4-vinylphenol sulfate	1595	TRUE	0.651044	0.0739103	-0.0772611	0.10986	0.0597005	-0.0362064	-0.0624273	-0.0896586	-0.00254122	-0.0198246	0.00281676	0.326567	0.214739	0.448273	0.445942	0.644714	0.466945	0.289647	0.402667	0.000639417	0.745417	0.656634
395	isobutyrylglycine	1595	TRUE	-1.14843	0.0726792	-0.015111	-0.0523232	-0.155286	-0.114375	-0.215079	-0.11568	0.0100864	0.0284999	8.95945e-08	0.327627	0.805513	0.714016	0.044251	0.139384	0.0109853	0.165651	0.000750308	6.33731e-07	0.745417	0.961691
96	1-palmitoyl-2-dihomo-linolenoyl-GPC (16:0/20:3n3 or 6)*	1595	TRUE	-2.00704	-0.0707463	-0.0445185	-0.0259975	0.0205306	-0.055821	-0.0129414	-0.134773	0.0160565	0.0487841	1.03339e-21	0.328927	0.457359	0.852008	0.785234	0.459844	0.875416	0.0979647	3.85684e-08	2.43834e-18	0.745417	0.824699
175	2-pyrrolidinone	1595	TRUE	0.186995	-0.0703235	-0.0337556	0.0104292	-0.111596	0.465206	-0.340264	0.151335	-0.00273641	-0.00337898	0.369831	0.329215	0.571004	0.94002	0.136423	5.90491e-10	3.40497e-05	0.061732	0.346224	0.542995	0.745417	0.900902
252	alpha-ketoglutarate	1595	TRUE	-0.773713	0.0722057	-0.0561465	-0.129799	0.0758584	-0.0228403	-0.0607654	-0.091955	0.0056681	0.0191644	0.000308312	0.329969	0.359456	0.362483	0.324917	0.767483	0.471692	0.269652	0.0577915	0.000794102	0.745417	0.766745
9	1-(1-enyl-palmitoyl)-2-oleoyl-GPE (P-16:0/18:1)*	1595	TRUE	-1.00375	0.0724227	-0.0355067	-0.199672	-0.0434325	-0.0397853	-0.0233367	-0.174573	0.0202622	0.000450618	3.0631e-06	0.330014	0.563442	0.162554	0.5742	0.607648	0.782889	0.0366922	1.36665e-11	0.937319	0.745417	0.893899
461	N-delta-acetylornithine	1595	TRUE	-0.883467	0.0719053	0.0719089	0.0349502	-0.090983	-0.0187863	0.000197911	-0.0799172	0.0224251	-0.0103743	3.56381e-05	0.330342	0.23893	0.805652	0.23614	0.807217	0.998123	0.335737	5.00185e-14	0.0684138	0.745417	0.67043
575	trans-4-hydroxyproline	1595	TRUE	-0.728557	0.0718824	-0.0436366	0.0114213	-0.170854	-0.163749	-0.0502229	-0.19671	0.00860801	0.0151704	0.000662236	0.331126	0.475404	0.936	0.0262972	0.033654	0.551103	0.0179652	0.00388449	0.00778539	0.745417	0.827243
208	androstenediol (3alpha, 17alpha) monosulfate (3)	1595	TRUE	1.1401	0.0704722	-0.0524884	0.183943	-0.0129332	-0.0338782	-0.0642864	-0.141569	-0.0272896	0.0106216	5.64625e-08	0.331569	0.381645	0.187543	0.863915	0.654255	0.436813	0.082653	1.07492e-20	0.057588	0.745417	0.784866
385	(R)-3-hydroxybutyrylcarnitine	1595	TRUE	-2.15385	0.0704058	-0.0920153	-0.0306338	-0.0123347	0.0955771	-0.0676031	0.172564	0.0257632	0.0310279	1.03083e-24	0.331754	0.124892	0.82618	0.870083	0.206155	0.413265	0.0342886	1.234e-18	2.85721e-08	0.745417	0.563485
427	myo-inositol	1595	TRUE	-1.37869	0.071898	0.0329351	-0.136696	0.0233815	-0.143698	0.0593532	-0.00309544	0.0291751	-0.00476527	1.26215e-10	0.331872	0.59076	0.337379	0.761494	0.0627712	0.481907	0.970348	1.52914e-22	0.404016	0.745417	0.902091
465	N-methylproline	1595	TRUE	-0.377621	-0.0732035	-0.0276221	-0.140974	0.066826	0.0102781	0.104342	-0.00328727	0.00641252	0.00148345	0.0837657	0.332143	0.657984	0.331453	0.394472	0.896053	0.224916	0.96909	0.0350566	0.798725	0.745417	0.907897
734	X - 23644	1595	TRUE	0.28829	-0.0730693	0.000760412	-0.313088	-0.047314	-0.0493015	-0.123112	-0.157755	-0.00101661	-0.00586706	0.186311	0.332516	0.990266	0.0308344	0.546147	0.530425	0.151746	0.0626671	0.738002	0.312689	0.745417	0.995981
128	1-stearoyl-2-linoleoyl-GPC (18:0/18:2)*	1595	TRUE	-0.853412	-0.0720522	0.053644	-0.0319238	-0.057744	-0.152271	-0.08874	-0.270477	0.0161413	0.00543259	7.40817e-05	0.333081	0.383321	0.823529	0.455599	0.0496824	0.295306	0.00122519	7.45938e-08	0.34368	0.745417	0.784866
623	X - 11850	1595	TRUE	-0.0730914	0.0718233	0.0167891	-0.139902	0.0224468	0.0368218	0.0504347	-0.00350939	0.0115971	-0.0213276	0.734009	0.33405	0.784724	0.327849	0.771527	0.634665	0.551508	0.966502	0.000108951	0.000197763	0.745417	0.961691
523	quinate	1595	TRUE	-0.592794	0.0716411	-0.0564014	-0.0266992	-0.00465703	-0.0350484	0.0113056	-0.145674	0.0172019	-0.00986669	0.00597157	0.336422	0.359922	0.852218	0.952074	0.651833	0.894056	0.08201	1.02578e-08	0.0858414	0.748489	0.766745
333	gamma-glutamylalanine	1595	TRUE	-1.09865	0.0708295	0.05123	0.085676	0.0282735	-0.148494	-0.11801	-0.0055569	0.0111256	0.0211515	3.25317e-07	0.340722	0.40448	0.548985	0.714515	0.0553024	0.163452	0.946974	0.000204923	0.000222869	0.751329	0.800445
184	3-hydroxy-3-methylglutarate	1595	TRUE	-1.73642	0.0701979	0.0388567	0.239368	-0.0899499	-0.195354	-0.0930368	-0.0177666	0.0252337	0.0198274	3.92939e-16	0.341042	0.523756	0.0913604	0.240614	0.0110134	0.267945	0.830229	2.04449e-17	0.000484266	0.751329	0.863738
383	HWESASXX*	1595	TRUE	-0.608287	0.0702503	0.152968	0.119323	-0.0771125	0.0932106	-0.201501	-0.00359832	-0.000452268	0.024333	0.00441916	0.341564	0.0122334	0.400882	0.315309	0.225972	0.0166236	0.965426	0.879256	1.91642e-05	0.751329	0.306651
118	1-pentadecanoyl-2-oleoyl-GPC (15:0/18:1)*	1595	TRUE	-1.81327	0.0686378	0.0434921	-0.16618	0.0854747	-0.0644014	0.0181924	-0.115941	0.0305137	0.0100059	4.97318e-18	0.343281	0.467553	0.232805	0.256317	0.393558	0.825467	0.154341	1.42331e-25	0.0730406	0.751329	0.824699
735	X - 23705	1595	TRUE	1.25505	0.0709793	0.00857381	-0.16542	-0.0411723	-0.0185195	-0.115681	-0.270324	-0.012325	-0.0213861	6.96332e-09	0.34332	0.889864	0.25079	0.597009	0.812477	0.175145	0.00132193	4.45663e-05	0.000211673	0.751329	0.975004
643	X - 12680	1595	TRUE	-1.08453	0.0707791	0.049222	-0.188579	-0.153942	-0.116112	-0.194139	-0.0908566	0.0204343	0.0049569	5.29897e-07	0.343693	0.42567	0.189555	0.0476058	0.136111	0.0226015	0.279475	1.18198e-11	0.38955	0.751329	0.815034
290	citraconate/glutaconate	1595	TRUE	-0.694	0.0710125	0.0484693	-0.0963194	-0.152139	-0.178892	-0.329718	-0.27833	0.0145702	0.00475373	0.00145394	0.345956	0.436449	0.506214	0.0521236	0.022725	0.000122208	0.00101362	1.60586e-06	0.413011	0.754084	0.824699
350	glutamate	1595	TRUE	-2.54016	0.066742	0.020642	0.0433495	0.0737579	-0.130352	-0.0260501	0.175055	0.0239997	0.0497373	1.83284e-34	0.352044	0.72769	0.753277	0.322559	0.081167	0.749814	0.0298683	1.01894e-16	2.28744e-19	0.763386	0.940196
328	etiocholanolone glucuronide	1595	TRUE	1.2473	0.0682148	-0.135566	-0.0590205	0.0078454	0.0456853	0.036265	0.0392875	-0.0261701	0.00313889	4.5298e-09	0.353543	0.025717	0.67638	0.918258	0.551069	0.66502	0.634489	1.04303e-18	0.579645	0.763386	0.371908
713	X - 21729	1595	TRUE	-0.767203	0.0692876	0.0698512	0.00111497	-0.0433727	0.0203458	-0.0761684	0.160401	0.00552489	0.0170651	0.00038742	0.353854	0.258167	0.99381	0.576691	0.793924	0.370911	0.0561694	0.0666286	0.00304798	0.763386	0.689187
680	X - 16944	1595	TRUE	-0.829385	0.0682279	-0.0817589	0.204077	-0.198973	-0.110198	-0.0995068	-0.0238727	-0.00381268	0.0440264	0.000103216	0.355437	0.180364	0.15062	0.00953941	0.152123	0.236734	0.773581	0.200129	1.01693e-14	0.763386	0.616517
595	X - 10358	1595	TRUE	-1.05962	-0.0677638	0.0192857	-0.0518047	0.0280789	-0.0992323	0.0771291	-0.077996	0.0249283	-0.00759511	6.24721e-07	0.356532	0.750909	0.713969	0.713274	0.195164	0.3569	0.345054	3.93166e-17	0.179973	0.763386	0.955116
599	X - 11305	1595	TRUE	-0.850278	-0.0686416	-0.0284319	-0.000240112	-0.108258	0.00213432	-0.198442	-0.155347	0.0185791	-0.000647846	7.93152e-05	0.356687	0.644186	0.998662	0.16206	0.978063	0.0193216	0.0634536	6.03715e-10	0.910133	0.763386	0.907897
93	1-palmitoyl-2-arachidonoyl-GPC (16:0/20:4n6)	1595	TRUE	-1.24268	0.0683585	-0.0493396	-0.0441488	-0.0426335	-0.0488373	-0.213349	-0.16294	0.0139686	0.0242282	8.18407e-09	0.358936	0.423106	0.758005	0.582098	0.529441	0.0119496	0.0516967	3.30358e-06	2.45531e-05	0.763386	0.813748
695	X - 18899	1595	TRUE	0.0228563	-0.068149	0.0627149	-0.200655	-0.111192	-0.048442	-0.0278	-0.0818518	-0.00837433	0.0184279	0.915714	0.361284	0.309463	0.162181	0.15195	0.533524	0.743715	0.329258	0.00538184	0.00135992	0.763386	0.717539
629	X - 12100	1595	TRUE	-1.52826	0.0678188	0.0417072	-0.0533003	-0.144077	-0.0348404	-0.120638	0.102402	0.0184261	0.0240749	1.21104e-12	0.361745	0.49743	0.709341	0.0623708	0.653028	0.154365	0.220455	7.85205e-10	2.65862e-05	0.763386	0.838717
431	myristoylcarnitine (C14)	1595	TRUE	-2.16267	0.065247	-0.0677399	-0.233102	-0.123517	-0.209137	-0.03779	0.0116679	0.0359527	0.0156305	1.48272e-25	0.361771	0.252024	0.0902077	0.0967957	0.00503484	0.642848	0.884623	1.11803e-35	0.0045859	0.763386	0.681864
442	N-acetylaspartate (NAA)	1595	TRUE	-0.276976	-0.0685989	-0.0133111	0.068154	-0.317598	-0.129476	-0.215601	0.0116435	0.00930094	-0.0021484	0.203476	0.362186	0.830625	0.63781	4.9557e-05	0.098908	0.0119306	0.890546	0.0021755	0.711176	0.763386	0.961691
91	1-palmitoleoyl-GPC (16:1)*	1595	TRUE	-2.04771	0.0662971	0.100186	-0.101261	0.0992232	0.0337138	0.0355599	0.0730946	0.0247011	0.027722	2.7789e-22	0.363174	0.0964342	0.470145	0.190529	0.657271	0.668514	0.372368	4.25488e-17	8.07256e-07	0.763386	0.511214
337	gamma-glutamylglycine	1595	TRUE	-0.252463	0.0680815	0.0469401	-0.0909048	0.0449754	-0.0860032	-0.109217	0.0269873	0.0103131	-0.0107459	0.244031	0.36342	0.448405	0.528002	0.563605	0.270635	0.200546	0.748546	0.000636018	0.0626964	0.763386	0.824699
157	2-hydroxypalmitate	1595	TRUE	-0.338708	-0.0678599	0.11585	-0.0431299	-0.0443198	0.0336514	0.0188937	0.0757631	0.00968197	-0.00781523	0.120591	0.36826	0.063138	0.766186	0.571936	0.668579	0.825933	0.371435	0.0014481	0.178791	0.770119	0.45279
224	5-acetylamino-6-amino-3-methyluracil	1595	TRUE	-1.09424	0.0662269	-0.132309	0.133404	-0.0944961	-0.0787146	-0.0591233	-0.0266078	0.017467	0.0106672	3.07187e-07	0.370085	0.0302911	0.347796	0.218658	0.306705	0.482383	0.748656	4.49021e-09	0.0610392	0.770119	0.404457
667	X - 15486	1595	TRUE	-1.43468	0.0652994	-0.152502	0.09306	-0.159752	-0.0572062	-0.0549519	0.0224881	0.00292315	0.052946	1.08991e-11	0.370989	0.0114853	0.507338	0.0352797	0.452056	0.508652	0.783984	0.32042	4.8738e-21	0.770119	0.301708
389	imidazole propionate	1595	TRUE	-0.543283	-0.0666296	-0.113441	0.0448939	-0.0473111	-0.0766746	-0.128234	-0.202065	-0.000435131	0.026356	0.0117534	0.37136	0.0655906	0.754121	0.541515	0.323633	0.130946	0.0158595	0.884839	4.47437e-06	0.770119	0.45279
351	glutamine	1595	TRUE	-0.244312	0.0661836	-0.067235	-0.071915	-0.138202	-0.0691433	-0.0190916	-0.271772	0.0164008	-0.0194498	0.255424	0.372767	0.273347	0.614527	0.0734276	0.371624	0.821422	0.00112791	4.25721e-08	0.000677305	0.770119	0.708818
528	salicylate	1595	TRUE	0.23851	-0.0669969	0.0166298	0.149999	-0.140077	-0.114949	-0.100936	-0.154482	0.00293839	-0.011119	0.272738	0.37277	0.788976	0.299414	0.0730667	0.142301	0.238456	0.0674588	0.332123	0.0549446	0.770119	0.961691
509	pregnenolone sulfate	1595	TRUE	2.15138	0.0624855	-0.0525809	-0.023488	0.0591442	0.10322	0.0890028	-0.0463458	-0.0398231	-0.00677326	9.82588e-26	0.37818	0.369658	0.863234	0.422378	0.162483	0.270471	0.560852	3.92043e-44	0.215176	0.777047	0.773155
424	methyl indole-3-acetate	1595	TRUE	-2.2719	0.0630914	0.122221	0.0833259	-0.0264428	-0.0140827	-0.0463651	0.0750201	0.0296934	0.0277016	5.39973e-28	0.378191	0.0389021	0.545033	0.722403	0.850302	0.569669	0.351162	7.82875e-25	5.15665e-07	0.777047	0.416536
429	myristoleate (14:1n5)	1595	TRUE	-1.76865	-0.0634753	-0.0722698	-0.297402	-0.299483	-0.314898	-0.11805	-0.105132	0.0308007	0.0158289	2.89492e-17	0.380255	0.226841	0.0325356	6.83927e-05	2.96012e-05	0.151979	0.195995	4.41659e-26	0.00452522	0.77801	0.66118
684	X - 17146	1595	TRUE	-0.641237	-0.0652028	-0.0584711	-0.36792	-0.381225	-0.0594628	-0.359259	-0.306093	0.00939513	0.0164187	0.00288495	0.380728	0.341637	0.0101101	8.24657e-07	0.44308	2.23508e-05	0.000250893	0.00172678	0.00418404	0.77801	0.7521
151	2-hydroxyadipate	1595	TRUE	-1.20756	0.0642807	0.078677	-0.131254	0.093922	-0.131057	-0.0630606	-0.118241	0.0108983	0.0260102	1.78033e-08	0.38575	0.199044	0.357073	0.222865	0.0897472	0.455066	0.155734	0.00026391	5.26972e-06	0.784127	0.63818
138	2,3-dihydroxyisovalerate	1595	TRUE	-0.29996	0.0646833	0.00931533	-0.205961	-0.0461537	-0.100198	0.03362	-0.000734011	0.0128675	-0.01338	0.164849	0.386216	0.880004	0.15136	0.552055	0.197787	0.692558	0.993019	1.89776e-05	0.020037	0.784127	0.973719
565	tetradecanedioate (C14-DC)	1595	TRUE	-0.852356	0.0640839	0.00841706	-0.236003	-0.200326	-0.205335	-0.11761	-0.090515	0.0233215	-0.00869179	6.97469e-05	0.386998	0.890671	0.0975875	0.00929464	0.00782493	0.163384	0.27696	5.68919e-15	0.127912	0.784127	0.975004
244	acetylcarnitine (C2)	1595	TRUE	-2.28078	0.0622116	-0.00547227	-0.145679	-0.109567	-0.0718056	-0.05426	0.105173	0.0325042	0.0247855	8.6305e-28	0.38857	0.926896	0.29376	0.144129	0.339648	0.509131	0.19465	5.30733e-29	8.30743e-06	0.784127	0.980551
228	5alpha-pregnan-3beta,20alpha-diol monosulfate (2)	1595	TRUE	2.90262	-0.0589211	-0.0516242	-0.032772	0.124452	0.0806661	0.161872	0.0361514	-0.0511479	-0.0128204	9.95358e-49	0.388935	0.361144	0.803217	0.0800651	0.257752	0.0377173	0.638115	7.41012e-77	0.0150018	0.784127	0.766806
545	sphingomyelin (d18:2/24:1, d18:1/24:2)*	1595	TRUE	-2.40801	-0.0611745	0.011297	-0.162613	0.0192357	-0.0272975	-0.0754939	-0.166671	0.0359759	0.0244631	2.42528e-31	0.392062	0.848362	0.23678	0.795748	0.714034	0.353789	0.0380039	8.70757e-36	8.95983e-06	0.788316	0.962573
438	N6-carbamoylthreonyladenosine	1595	TRUE	-1.96563	0.0625684	-0.00552054	0.129836	-0.0138132	-0.0284071	0.00236027	0.0876738	0.0154467	0.0452286	2.00244e-20	0.39369	0.927459	0.357367	0.856275	0.710219	0.977465	0.287586	1.74824e-07	1.24406e-15	0.789102	0.980551
749	X - 24309	1595	TRUE	-0.743966	-0.0635061	0.0128769	0.0225472	-0.0406852	-0.0991566	-0.0410039	-0.152074	0.00208914	0.0280236	0.000565645	0.394551	0.834569	0.875097	0.59984	0.202139	0.62938	0.0696744	0.487132	1.08965e-06	0.789102	0.961691
384	hydantoin-5-propionate	1595	TRUE	-2.27355	0.0606897	0.0285428	-0.0246036	-0.172657	-0.24932	-0.226811	-0.205454	0.0257481	0.0430296	4.05392e-28	0.395838	0.629033	0.857941	0.0201592	0.000817547	0.00534036	0.0105419	3.9887e-19	5.66973e-15	0.789577	0.907897
562	taurocholenate sulfate*	1595	TRUE	0.00520271	-0.0638675	0.014472	-0.0801063	0.0133867	0.0442587	-0.0866739	-0.0158422	0.00196116	-0.00366599	0.981005	0.397806	0.816706	0.581299	0.864645	0.573976	0.313753	0.851962	0.519467	0.528866	0.791403	0.961691
340	gamma-glutamylleucine	1595	TRUE	-2.52686	0.059958	0.0480707	-0.0675484	-0.0305569	-0.209503	-0.13675	-0.0028494	0.0315403	0.037262	1.4556e-34	0.399946	0.414277	0.621932	0.679898	0.00477339	0.091917	0.971608	4.49609e-28	1.14248e-11	0.79167	0.806336
204	3-phenylpropionate (hydrocinnamate)	1595	TRUE	0.949631	0.0620688	0.065037	-0.277238	-0.0228643	-0.015454	0.047533	0.0201869	0.00328977	-0.0442007	8.56955e-06	0.400046	0.286088	0.0506265	0.765574	0.840668	0.571547	0.807598	0.268463	7.5005e-15	0.79167	0.715014
637	X - 12411	1595	TRUE	-1.50616	0.0611774	-0.00425315	0.187975	0.0453705	-0.119858	-0.037017	-0.0291982	0.0240357	0.0111108	9.14409e-13	0.401273	0.943722	0.179884	0.549355	0.114606	0.655697	0.721514	2.80207e-16	0.0479376	0.792014	0.982935
592	X - 02269	1595	TRUE	-0.152602	0.060355	0.107004	0.218629	0.0209449	0.129948	-0.0344015	-0.119023	0.020553	-0.0370861	0.464739	0.402875	0.0727965	0.115096	0.780083	0.0839776	0.675525	0.142168	1.57958e-12	2.57182e-11	0.793094	0.471922
40	1-arachidonoyl-GPE (20:4n6)*	1595	TRUE	-0.695213	0.0628997	0.0589522	0.0681736	-0.0854576	-0.0643597	-0.00297925	-0.0537903	0.00951441	0.00882041	0.001436	0.404126	0.344185	0.638207	0.275616	0.412754	0.972326	0.525557	0.00174267	0.129024	0.793479	0.752404
150	2-hydroxy-3-methylvalerate	1595	TRUE	-0.838221	0.0606664	-0.102314	0.219415	-0.0457496	-0.0934736	0.021057	-0.0562446	-0.000216048	0.0339768	7.59888e-05	0.407404	0.0909731	0.119199	0.54789	0.220659	0.800695	0.494345	0.941647	1.74015e-09	0.79488	0.49544
459	N-acetyltyrosine	1595	TRUE	-1.91163	-0.0599019	-0.150927	0.135005	-0.112644	-0.191187	-0.24353	-0.0253488	0.0165068	0.047238	6.80161e-20	0.407814	0.011635	0.331996	0.134351	0.0112494	0.00313376	0.755295	1.52186e-08	2.46359e-17	0.79488	0.301708
415	maleate	1595	TRUE	-1.14523	0.0622423	0.110444	-0.273685	-0.0895157	-0.184897	-0.223569	-0.190003	0.0171063	0.0151781	1.42334e-07	0.40801	0.0757159	0.0585074	0.252399	0.0183591	0.00907842	0.0246197	1.68347e-08	0.00884637	0.79488	0.482528
237	5-methyluridine (ribothymidine)	1595	TRUE	0.126568	-0.0614351	0.00746435	-0.00660527	-0.0160393	-0.0355185	-0.031547	-0.0651834	0.00944613	-0.0231099	0.557732	0.410399	0.903693	0.963291	0.836232	0.647926	0.710564	0.43708	0.00168797	5.87315e-05	0.797467	0.975004
66	1-margaroylglycerol (17:0)	1595	TRUE	-1.2665	-0.0608636	0.106214	0.180496	-0.220852	-0.114164	-0.0758022	-0.0704594	0.0169167	0.0186514	3.67419e-09	0.412201	0.083415	0.206018	0.00420936	0.139989	0.369932	0.3983	1.56092e-08	0.00111187	0.798905	0.490437
21	1,2-dilinoleoyl-GPC (18:2/18:2)	1595	TRUE	0.778231	-0.0606203	0.0439966	-0.214504	-0.0185157	-0.0552189	-0.033675	-0.244088	0.0030097	-0.0337902	0.000287308	0.413792	0.47304	0.132644	0.810261	0.475066	0.690223	0.00341292	0.3141	3.40801e-09	0.799349	0.825351
492	phenylacetylglutamine	1595	TRUE	-1.15848	0.0596572	0.0230381	-0.0646022	0.117234	0.120336	0.165708	0.0630273	0.0202831	0.000636226	4.92008e-08	0.416468	0.704234	0.647264	0.124572	0.115801	0.0475392	0.444967	7.1721e-12	0.910475	0.799349	0.92262
615	X - 11537	1595	TRUE	0.499831	-0.0595161	0.127197	-0.0203478	0.0710558	0.117676	-0.0478921	0.136157	0.00498444	-0.0330334	0.01872	0.418001	0.0362632	0.885511	0.352356	0.124426	0.567225	0.0992359	0.0924098	5.45852e-09	0.799349	0.41318
127	1-stearoyl-2-docosapentaenoyl-GPC (18:0/22:5n6)*	1595	TRUE	-1.01623	-0.0599383	-0.0277521	0.0818017	-0.0424054	-0.0675754	0.00254454	-0.158363	0.00423082	0.0338656	2.09107e-06	0.418194	0.650219	0.565605	0.581707	0.381177	0.97593	0.0570224	0.156268	2.94022e-09	0.799349	0.907897
719	X - 21892	1595	TRUE	-1.97904	0.0588613	-0.0243499	-0.336646	-0.168295	-0.221475	-0.0936336	0.034943	0.0311245	0.0190576	5.13156e-21	0.418294	0.685434	0.0160757	0.0260226	0.00347729	0.258339	0.668998	2.44975e-26	0.000673348	0.799349	0.921689
690	X - 17189	1595	TRUE	-0.299595	-0.0604201	-0.142502	-0.00250466	0.0225475	0.00773754	-0.0191616	0.0119494	0.00617641	0.0011148	0.165833	0.418808	0.0210652	0.986095	0.771665	0.920866	0.821903	0.886866	0.040317	0.846526	0.799349	0.371908
503	pimelate (heptanedioate)	1595	TRUE	-0.872562	-0.0603036	0.184074	-0.258113	-0.177966	-0.111988	-0.176742	-0.00384572	0.00976914	0.0173367	5.82079e-05	0.42154	0.00299711	0.0736215	0.0225196	0.152101	0.0386331	0.963624	0.00123597	0.00271604	0.801734	0.194881
720	X - 22162	1595	TRUE	-1.31595	0.0597713	-0.00925503	-0.0937936	0.0547068	0.0675839	0.0379642	0.0829641	0.0191648	0.0103719	1.00803e-09	0.42219	0.88049	0.512501	0.479823	0.38388	0.654478	0.321561	1.71531e-10	0.0707404	0.801734	0.973719
585	urea	1595	TRUE	-2.46145	-0.0561336	-0.066134	-0.130952	0.0924441	-0.072379	-0.0104506	-0.0686365	0.037145	0.0225224	2.17804e-33	0.426975	0.257547	0.33521	0.208281	0.325717	0.896697	0.387457	7.09361e-39	3.54154e-05	0.807851	0.689187
363	glycocholenate sulfate*	1595	TRUE	-0.0746367	-0.0598588	-0.00253069	-0.108377	0.0551766	0.0409172	-0.0151017	-0.0927443	-0.00187408	0.00668801	0.732396	0.427559	0.967633	0.455086	0.4818	0.60282	0.860513	0.274071	0.537722	0.250077	0.807851	0.990032
268	beta-hydroxyisovalerate	1595	TRUE	-1.15504	0.0569319	-0.0981506	0.0466885	-0.220396	-0.206378	-0.13791	-0.142317	0.00997312	0.0299879	3.5936e-08	0.43206	0.101294	0.737589	0.00343951	0.00628213	0.094759	0.0805515	0.000638679	7.89057e-08	0.810155	0.511277
448	N-acetylglycine	1595	TRUE	0.889532	0.0565894	-0.067788	-0.291511	0.0837517	0.00411472	-0.0127734	0.0819326	0.0141245	-0.0637176	1.9988e-05	0.432476	0.255316	0.0354907	0.263822	0.956327	0.876389	0.311913	1.16867e-06	1.91222e-30	0.810155	0.688163
480	palmitate (16:0)	1595	TRUE	-1.72169	-0.056735	-0.0337298	-0.336911	-0.291223	-0.374255	-0.100943	-0.0417057	0.0288224	0.0171877	2.04816e-16	0.433289	0.573053	0.0155343	0.000109442	7.06817e-07	0.220981	0.608297	5.28199e-23	0.00206955	0.810155	0.900902
308	diglycerol	1595	TRUE	-0.82609	0.058992	0.00564973	0.0442001	-0.0283123	0.0115973	-0.00790729	-0.0863304	0.00590484	0.0210446	0.000151097	0.43372	0.927731	0.760358	0.717819	0.882607	0.926602	0.308043	0.0518852	0.000290612	0.810155	0.980551
230	5-dodecenoate (12:1n7)	1595	TRUE	-1.37862	-0.0573943	-0.072197	-0.277694	-0.316869	-0.286403	-0.139591	-0.160854	0.0253413	0.0120046	8.39045e-11	0.434166	0.233988	0.0491002	3.28075e-05	0.00018071	0.0949413	0.0511468	1.05995e-17	0.0337972	0.810155	0.668404
636	X - 12339	1595	TRUE	-1.1536	0.0570539	-0.0302124	-0.222119	0.0118633	0.00962056	0.015799	-0.135108	0.0124345	0.0209767	6.16433e-08	0.438553	0.619722	0.116827	0.87688	0.900263	0.850627	0.102641	2.80691e-05	0.000219531	0.812562	0.907897
313	dimethylglycine	1595	TRUE	-0.76452	0.0584349	-0.00872351	0.0507265	0.224128	0.0607448	0.102062	0.108383	0.00469088	0.0157766	0.000465604	0.438994	0.888846	0.72683	0.00430347	0.440179	0.235368	0.201549	0.123241	0.00670752	0.812562	0.975004
722	X - 22764	1595	TRUE	-1.15114	-0.056708	-0.103936	-0.144717	-0.309317	-0.265534	-0.106504	-0.133827	0.0233141	0.00631619	6.46627e-08	0.441082	0.0876163	0.306632	5.30742e-05	0.000537994	0.204021	0.105748	3.91048e-15	0.265571	0.812562	0.490482
408	leucylleucine	1595	TRUE	-1.41727	0.0567491	0.0412102	0.139832	0.1479	0.198314	-0.0227615	0.10986	0.00670492	0.0374172	3.07938e-11	0.441599	0.499038	0.324147	0.0537384	0.00987674	0.786427	0.185024	0.0240937	4.6076e-11	0.812562	0.839365
739	X - 24021	1595	TRUE	-0.182184	0.0575596	0.10107	-0.0496839	-0.0660592	-0.0239124	-0.0293283	0.082925	0.0093069	-0.012511	0.400531	0.44225	0.102625	0.730167	0.396318	0.759385	0.731058	0.324632	0.00205277	0.030229	0.812562	0.514495
543	sphingomyelin (d18:2/16:0, d18:1/16:1)*	1595	TRUE	-3.68318	-0.0510489	0.0687149	-0.101647	0.0130327	-0.0148975	-0.113708	-0.118627	0.0418654	0.0620434	1.13764e-80	0.445641	0.214241	0.429689	0.851436	0.830889	0.135845	0.114801	2.59739e-54	2.54696e-33	0.812562	0.656634
435	N2,N2-dimethylguanosine	1595	TRUE	-2.78285	0.0535725	-0.0279703	0.0973616	-0.139979	-0.0112347	0.0592464	0.0202936	0.0251479	0.0589003	3.42328e-42	0.448409	0.632074	0.473732	0.0567587	0.878766	0.461732	0.798332	1.05891e-18	2.94637e-27	0.812562	0.907897
721	X - 22379	1595	TRUE	1.47652	0.0541187	-0.0777839	0.202727	0.032152	-0.0458793	-0.0235811	-0.0461608	-0.0351342	0.0126459	9.49235e-13	0.449129	0.18817	0.140392	0.66538	0.538132	0.772181	0.565692	3.48363e-34	0.0217477	0.812562	0.629143
31	12-HETE	1595	TRUE	-1.03583	-0.0569268	0.0276586	0.0258728	0.0792707	0.0215013	0.0443107	0.20952	0.00663874	0.0243339	1.97922e-06	0.449585	0.656739	0.858174	0.311202	0.784075	0.605379	0.0132829	0.0286946	2.74531e-05	0.812562	0.907897
633	X - 12212	1595	TRUE	-0.0739537	-0.0563144	0.0667585	-0.232365	-7.71344e-05	0.00379766	0.0436676	-0.0587791	0.0120141	-0.021472	0.732325	0.45115	0.279873	0.105929	0.999208	0.961115	0.607991	0.484066	6.65601e-05	0.000193194	0.812562	0.711028
97	1-palmitoyl-2-docosahexaenoyl-GPC (16:0/22:6)	1595	TRUE	-1.55251	0.0540302	0.0815157	-0.118395	-0.0408869	-0.0516111	-0.14351	-0.135727	0.0372017	-0.0117368	7.84714e-14	0.451817	0.169679	0.39126	0.583941	0.490455	0.0793563	0.0926274	8.29852e-38	0.0339515	0.812562	0.609557
245	adenine	1595	TRUE	-1.32883	-0.0564065	-0.0186178	0.36729	0.0586721	-0.010515	-0.123945	-0.0156293	0.0141483	0.0240786	9.581e-10	0.452592	0.764244	0.0109824	0.452377	0.893131	0.14736	0.853092	2.95184e-06	3.17999e-05	0.812562	0.959451
139	21-hydroxypregnenolone disulfate	1595	TRUE	1.58173	0.054909	-0.0257168	-0.00898668	-0.01831	-0.0382147	-0.0429664	-0.0961665	-0.029705	-0.0013343	8.25653e-14	0.453359	0.670948	0.949117	0.809946	0.616575	0.606482	0.242619	7.96207e-24	0.813107	0.812562	0.914046
203	3-methylxanthine	1595	TRUE	-0.628886	0.055444	-0.137244	-0.206887	-0.16664	-0.0269171	-0.0266166	0.0697039	0.0079442	0.0118677	0.00342823	0.455415	0.0254035	0.147521	0.030944	0.728072	0.753083	0.403749	0.00796831	0.0381697	0.812562	0.371908
10	1-(1-enyl-palmitoyl)-2-palmitoyl-GPC (P-16:0/16:0)*	1595	TRUE	0.0303282	-0.0554502	0.0875454	-0.58696	0.025095	-0.0793278	-0.0638641	-0.056433	0.0122647	-0.0240666	0.88779	0.455459	0.154013	3.98667e-05	0.74527	0.305612	0.450465	0.499142	4.2101e-05	2.6337e-05	0.812562	0.597464
451	N-acetylleucine	1595	TRUE	-2.04083	0.0537851	-0.0727246	0.018226	-0.121789	-0.171794	-0.192993	-0.105093	0.0193594	0.045356	1.43667e-22	0.45608	0.222787	0.89551	0.104531	0.0223622	0.0188829	0.195054	2.81798e-11	3.49087e-16	0.812562	0.658298
728	X - 23293	1595	TRUE	-1.18701	-0.0550672	-0.107114	-0.153406	-0.138145	-0.123421	-0.108966	0.0120283	0.0232508	0.00382489	3.3692e-08	0.458696	0.0812162	0.283075	0.0737802	0.111051	0.198011	0.88549	8.34399e-15	0.504255	0.812562	0.490437
390	indoleacetate	1595	TRUE	-0.434052	0.0552148	0.0892757	0.0120734	0.107642	-0.0787733	0.00962464	-0.0715233	0.0122538	-0.00901354	0.0442141	0.459015	0.147511	0.9329	0.164993	0.310771	0.909782	0.393416	4.56045e-05	0.116787	0.812562	0.597464
197	3-methyl-2-oxovalerate	1595	TRUE	-0.166652	0.0554961	-0.086132	0.0128607	-0.0639237	-0.0608816	-0.11936	-0.309062	0.00499892	0.000665104	0.442507	0.459386	0.164788	0.928956	0.412391	0.436113	0.162416	0.000246258	0.0982402	0.908405	0.812562	0.604489
17	1-(1-enyl-stearoyl)-2-oleoyl-GPC (P-18:0/18:1)	1595	TRUE	0.735603	0.0537651	0.0150343	-0.40965	0.0471125	-0.0226849	0.117554	-0.135689	0.0125982	-0.0540504	0.000491118	0.461107	0.803111	0.00349854	0.534477	0.765419	0.157154	0.0979235	1.82995e-05	6.99547e-22	0.812562	0.961691
748	X - 24293	1595	TRUE	-0.179233	0.0545447	-0.0884939	-0.0163457	-0.10146	-0.0822435	-0.122447	-0.0618114	0.00801444	-0.0064188	0.40294	0.461509	0.148381	0.908643	0.187684	0.286731	0.146716	0.457799	0.00726692	0.26086	0.812562	0.597464
109	1-palmitoyl-2-palmitoleoyl-GPC (16:0/16:1)*	1595	TRUE	-2.29294	0.0529266	-0.0134548	-0.236164	0.05298	-0.0122344	-0.00415866	-0.0197265	0.0247288	0.0402656	2.90754e-28	0.461608	0.820882	0.0875923	0.478434	0.870294	0.959498	0.807119	1.41325e-17	3.66932e-13	0.812562	0.961691
596	X - 10458	1595	TRUE	-1.01914	0.0541973	0.0242105	0.147961	-0.120776	0.0392244	-0.0112934	0.370428	0.0109121	0.0157577	1.92661e-06	0.463878	0.692225	0.298405	0.116414	0.611005	0.893406	8.41124e-06	0.000253287	0.00572303	0.812562	0.921689
471	oleate/vaccenate (18:1)	1595	TRUE	-1.68816	-0.0528908	-0.07316	-0.289465	-0.315428	-0.383306	-0.0965586	-0.0533584	0.0297046	0.0147226	6.64048e-16	0.464111	0.220551	0.0372047	2.67579e-05	3.56873e-07	0.240658	0.511085	1.96439e-24	0.00818996	0.812562	0.658154
300	cysteine s-sulfate	1595	TRUE	-0.984924	0.0538805	-0.0775143	-0.325092	-0.105863	-0.193583	-0.0295261	-0.0493374	0.00950739	0.0228422	4.39722e-06	0.467413	0.205965	0.0226063	0.169654	0.0122414	0.726638	0.553806	0.00146598	6.40605e-05	0.812562	0.644858
564	taurolithocholate 3-sulfate	1595	TRUE	0.212935	0.05419	0.0591353	0.00770107	-0.0306686	0.10399	-0.0664449	-0.0383641	0.00495674	-0.0186283	0.324731	0.468424	0.33848	0.957269	0.693081	0.181883	0.435116	0.647876	0.0998885	0.00122095	0.812562	0.748637
226	5alpha-androstan-3beta,17beta-diol disulfate	1595	TRUE	-0.207329	0.0537536	0.0112288	0.0183701	0.0460582	0.0846574	-0.0149986	-0.0299579	-0.0105167	0.0268649	0.334035	0.468708	0.854712	0.897542	0.550401	0.27355	0.859122	0.719366	0.000436266	2.61849e-06	0.812562	0.96508
137	1-stearyl-GPC (O-18:0)*	1595	TRUE	1.05232	0.0538155	0.125418	-0.099505	0.092	-0.0319384	-0.00917932	0.0377328	-0.00409373	-0.0350741	9.72233e-07	0.468739	0.0410799	0.486029	0.233514	0.679918	0.913603	0.651265	0.171499	8.9548e-10	0.812562	0.417461
75	1-myristoyl-2-palmitoyl-GPC (14:0/16:0)	1595	TRUE	-1.4495	-0.0529487	0.0285514	-0.246926	-0.0440845	-0.174782	-0.153097	-0.227349	0.0258908	0.0100285	7.27619e-12	0.468987	0.636661	0.0790794	0.561986	0.0218204	0.0660444	0.0056665	1.56637e-18	0.0751526	0.812562	0.907897
349	glucuronate	1595	TRUE	-1.51053	0.0540488	0.0475617	-0.0505449	0.0740612	-0.0587014	0.0536117	0.0814064	0.0176981	0.0216548	2.67949e-12	0.469096	0.440893	0.724796	0.340007	0.4506	0.52842	0.331953	4.06893e-09	0.000167571	0.812562	0.824699
727	X - 23026	1595	TRUE	-1.52568	-0.0534523	-0.0771134	0.0334325	0.00045842	-0.011815	0.0374763	-0.0113911	0.0176286	0.0244615	9.42771e-13	0.469339	0.206663	0.813949	0.995238	0.878041	0.656061	0.890875	3.21187e-09	1.73631e-05	0.812562	0.644858
441	N-acetylasparagine	1595	TRUE	0.20632	-0.0547111	-0.0832031	-0.140694	-0.191995	-0.0301454	-0.0513074	-0.16862	0.000681	-0.00509966	0.346354	0.470032	0.183818	0.334014	0.0147509	0.702517	0.552001	0.0475827	0.823461	0.382273	0.812562	0.61987
263	aspartylphenylalanine	1595	TRUE	-0.861999	-0.0537731	-0.0628202	-0.0497506	0.024481	-0.0827115	0.132002	0.0764084	0.00608103	0.0214147	6.52597e-05	0.471145	0.308468	0.728819	0.752342	0.287548	0.120426	0.362255	0.0431943	0.000196401	0.812617	0.717539
403	lactate	1595	TRUE	-0.522111	-0.053341	-0.112082	-0.00661529	-0.0532357	-0.229529	0.0271265	-0.0471863	0.000957527	0.0222977	0.0154408	0.474103	0.0688209	0.96318	0.491992	0.00312258	0.749285	0.57315	0.749877	0.000103381	0.815848	0.467743
32	13-HODE + 9-HODE	1595	TRUE	-0.402749	-0.053388	0.0658001	0.0680229	-0.117878	-0.124687	-0.163759	-0.00197588	0.00523301	0.00805725	0.0628299	0.475563	0.287433	0.636423	0.129731	0.109873	0.0547049	0.981256	0.0827384	0.162389	0.816492	0.715727
561	taurochenodeoxycholate	1595	TRUE	0.51178	0.0534132	0.116228	0.145458	-0.0858721	-0.0839879	-0.204896	-0.13033	-0.00307443	-0.011305	0.0194639	0.480507	0.0632883	0.317766	0.275305	0.287157	0.017508	0.12561	0.313708	0.0526938	0.820323	0.45279
660	X - 14056	1595	TRUE	-0.422993	0.0528147	-0.0277916	0.203511	0.0241857	-0.0110551	0.111016	-0.103764	-0.00173825	0.0195417	0.0508256	0.48053	0.653375	0.157493	0.756011	0.887332	0.192984	0.217503	0.564589	0.000707209	0.820323	0.907897
360	glycine	1595	TRUE	0.680059	0.0528838	-0.0459667	-0.143057	-0.0207247	-0.076256	0.0365427	-0.0453289	0.00526649	-0.0356277	0.00173689	0.481067	0.458761	0.321618	0.790559	0.329649	0.66907	0.591022	0.0817106	7.31972e-10	0.820323	0.824699
419	margarate (17:0)	1595	TRUE	-1.55855	-0.0502994	-0.0201371	-0.259544	-0.267205	-0.308039	-0.0983294	-0.0152023	0.031888	0.00330004	9.16772e-14	0.486547	0.73612	0.0618976	0.000377539	4.34004e-05	0.232419	0.851569	7.08577e-28	0.553634	0.827791	0.943842
729	X - 23314	1595	TRUE	-0.0737599	-0.0515911	0.0131622	-0.315058	-0.0191545	-0.0909049	-0.0465113	0.00898884	0.0107226	-0.0167134	0.733321	0.490548	0.831493	0.0285689	0.805525	0.24378	0.585297	0.914884	0.00037787	0.00375566	0.831897	0.961691
291	citrate	1595	TRUE	-0.97536	0.050346	0.0320297	0.16897	-0.213147	-0.127171	-0.146029	-0.0515369	0.0237294	-0.00561939	4.24093e-06	0.492203	0.597087	0.230662	0.00516199	0.0960002	0.0803124	0.531608	9.64382e-16	0.319904	0.831897	0.902091
590	xanthine	1595	TRUE	-0.831244	0.0515906	0.0340354	-0.0795544	-0.0822436	-0.184424	0.047613	0.0397222	0.00535229	0.0232068	0.000131088	0.492279	0.583659	0.581883	0.292379	0.0185079	0.577959	0.638047	0.0771466	6.12647e-05	0.831897	0.902091
248	allantoin	1595	TRUE	-1.43177	0.0504963	-0.0228851	0.050342	-0.124203	-0.221299	-0.118908	0.0340531	0.00886823	0.0416429	2.17098e-11	0.494601	0.708054	0.723274	0.106125	0.00407871	0.157958	0.681935	0.00292045	2.70414e-13	0.832618	0.926011
57	1-linolenoyl-GPC (18:3)*	1595	TRUE	-0.262988	-0.0514203	0.0130269	-0.111122	-0.0569425	-0.0603127	-0.0272158	-0.0759482	0.00667662	-0.00128141	0.227597	0.494921	0.834312	0.443095	0.467251	0.442428	0.751145	0.369753	0.0279035	0.82534	0.832618	0.961691
610	X - 11470	1595	TRUE	-0.569569	-0.0504355	-0.0807537	-0.00247692	0.0269805	-0.0623873	0.00766868	-0.0543814	0.00581013	0.0109663	0.00814399	0.49786	0.189184	0.986188	0.727252	0.421095	0.927903	0.515484	0.0526977	0.0558262	0.834269	0.629497
549	stearate (18:0)	1595	TRUE	-1.13995	-0.0496645	-0.0202705	-0.203229	-0.244351	-0.360965	-0.10364	-0.0119241	0.0250045	0.00115104	7.66644e-08	0.498121	0.738004	0.149431	0.00134644	2.30945e-06	0.214572	0.884931	2.62679e-17	0.838573	0.834269	0.943842
456	N-acetylserine	1595	TRUE	-0.720319	0.0501634	-0.0521876	-0.0268427	0.00121489	0.0155721	0.0202293	-0.0303175	0.00591514	0.0160482	0.000869032	0.502306	0.398484	0.851915	0.987532	0.841623	0.812263	0.71828	0.0496878	0.00535694	0.839409	0.796761
393	inosine	1595	TRUE	0.389027	0.0489565	0.084071	0.116249	0.0419123	0.13402	-0.157846	-0.0039957	-0.0057207	-0.00525017	0.0710489	0.511049	0.172153	0.417075	0.588389	0.0843069	0.0628511	0.961934	0.0567391	0.360464	0.852126	0.609557
593	X - 07765	1595	TRUE	0.338262	-0.0494204	-0.0126006	-0.0823572	0.0661089	0.11567	0.0350131	-0.075393	-0.00761097	0.00110058	0.122317	0.513701	0.840353	0.571429	0.400749	0.142476	0.684595	0.37536	0.0125835	0.850319	0.853045	0.961865
418	mannose	1595	TRUE	-2.09281	-0.0474013	-0.0855904	-0.0554814	-0.0894435	-0.108844	-0.0836316	0.0328668	0.0151146	0.0542865	2.21667e-23	0.513869	0.153859	0.691114	0.236082	0.150346	0.311935	0.68713	2.41051e-07	2.98951e-22	0.853045	0.597464
622	X - 11843	1595	TRUE	-0.289083	0.0483344	0.0343648	-0.0886431	0.10701	0.00124554	0.0823659	0.0715011	0.0107268	-0.0122869	0.18126	0.517846	0.578068	0.537425	0.168493	0.987243	0.333329	0.394679	0.000369996	0.0329291	0.854592	0.901882
678	X - 16935	1595	TRUE	0.320663	-0.0484283	-0.00128626	0.181573	0.0977807	0.0536967	0.16799	0.173394	-0.0157618	0.0154805	0.139301	0.518315	0.983441	0.20789	0.20968	0.491958	0.0491721	0.0396092	1.82942e-07	0.00738141	0.854592	0.994465
317	dodecanedioate (C12-DC)	1595	TRUE	-0.670801	0.04785	-0.0236109	-0.293098	-0.189456	-0.172694	-0.191124	-0.0858619	0.0239248	-0.0161897	0.00175051	0.518379	0.699846	0.0396691	0.0139107	0.0253208	0.0235313	0.302471	1.13167e-15	0.00457854	0.854592	0.921689
3	1-(1-enyl-palmitoyl)-2-arachidonoyl-GPE (P-16:0/20:4)*	1595	TRUE	-1.1837	0.0476599	-0.0156929	-0.150592	-0.041418	-0.0608079	-0.103454	-0.206476	0.0142884	0.0201672	3.96023e-08	0.522301	0.798836	0.293144	0.592794	0.43349	0.222755	0.0136536	1.94677e-06	0.000443468	0.854592	0.961691
303	cytidine	1595	TRUE	-1.30585	-0.0472081	0.0034477	0.274432	-0.0370142	0.0769241	-0.00934102	0.0531733	0.00987789	0.0306867	9.6948e-10	0.52251	0.954945	0.053222	0.62962	0.317408	0.91155	0.521598	0.000901041	6.90858e-08	0.854592	0.987783
344	gamma-glutamyltyrosine	1595	TRUE	-2.96627	0.0441693	0.00743914	-0.0250795	-0.0138205	-0.207438	-0.0912562	0.0645284	0.0366063	0.0441125	1.24138e-49	0.523445	0.896565	0.85057	0.847723	0.00403857	0.247157	0.406888	2.5494e-39	1.3616e-16	0.854592	0.975004
243	7-methylxanthine	1595	TRUE	-0.19734	0.0475841	-0.122454	-0.143838	-0.109017	0.0765678	-0.0224031	-0.000513696	0.000849299	0.00776778	0.362464	0.525245	0.0479563	0.317991	0.161538	0.326683	0.792875	0.995131	0.778469	0.178435	0.854592	0.424419
227	5alpha-pregnan-3beta,20alpha-diol disulfate	1595	TRUE	2.77116	-0.043488	-0.0472749	-0.133781	0.0704126	0.0474881	0.0649171	0.00448941	-0.0506647	-0.00690375	1.90379e-44	0.525453	0.403696	0.30975	0.322735	0.505873	0.405342	0.953491	3.11432e-75	0.190906	0.854592	0.800445
259	arachidonate (20:4n6)	1595	TRUE	-0.607003	-0.047882	0.0931914	0.175537	-0.0204354	-0.0386945	-0.0469578	0.0463534	0.00819928	0.00675629	0.00545056	0.525935	0.135361	0.226637	0.794594	0.622885	0.585038	0.584864	0.00705004	0.245579	0.854592	0.563485
281	C-glycosyltryptophan	1595	TRUE	-2.63404	0.0452531	0.0207312	0.132733	0.135399	0.00793088	0.139611	0.111539	0.0273076	0.0447363	5.077e-37	0.527507	0.72622	0.335206	0.0690207	0.915389	0.0870392	0.165864	3.10415e-21	5.30667e-16	0.854592	0.939962
411	linolenate [alpha or gamma; (18:3n3 or 6)]	1595	TRUE	-1.62487	-0.0459602	-0.0754631	-0.241489	-0.306843	-0.311222	-0.0876797	-0.0824146	0.0281724	0.0147141	1.19595e-14	0.527748	0.209748	0.0844741	5.01663e-05	4.08461e-05	0.290261	0.313708	7.7668e-22	0.00871578	0.854592	0.649096
375	hexadecanedioate (C16-DC)	1595	TRUE	-0.956317	0.04664	-0.00755545	-0.287007	-0.211126	-0.22132	-0.203149	-0.140435	0.0232166	-0.00302067	7.90036e-06	0.528438	0.901679	0.0436714	0.00605639	0.00410218	0.0159293	0.0912408	6.95154e-15	0.596289	0.854592	0.975004
702	X - 21319	1595	TRUE	0.740436	0.0467183	-0.0836142	0.100229	-0.106242	-0.072203	-0.079729	-0.00330502	-0.0213148	0.0165478	0.000601197	0.531117	0.175086	0.484729	0.170711	0.353029	0.348071	0.968554	1.34778e-12	0.00399735	0.857082	0.609557
449	N-acetylhistidine	1595	TRUE	-1.16372	-0.0459876	-0.134548	0.0138406	0.0666549	0.00582538	0.00797004	0.0265097	0.0257929	-0.00605491	5.21049e-08	0.533687	0.0276016	0.922404	0.385574	0.939701	0.924557	0.749555	4.69376e-18	0.287664	0.859384	0.384377
401	kynurenate	1595	TRUE	-2.14922	-0.0447473	-0.0685905	-0.0763323	-0.086176	-0.145352	-0.176407	-0.131591	0.0181496	0.0522	8.45259e-25	0.535684	0.25076	0.582729	0.251276	0.0535656	0.0320686	0.105107	4.58935e-10	6.94269e-21	0.859385	0.681864
368	glycylphenylalanine	1595	TRUE	-0.978294	0.046111	0.172476	-0.0826935	-0.0227548	0.133605	0.0744482	0.188752	0.0077982	0.0187786	5.6574e-06	0.535973	0.00510078	0.56382	0.768937	0.0853187	0.380347	0.0241842	0.00940822	0.00107398	0.859385	0.225635
520	pyroglutamylglycine	1595	TRUE	-1.33845	0.0455447	-0.00642067	-0.118848	-0.0998807	-0.083503	0.0810446	0.00490684	0.00989518	0.0333088	4.09718e-10	0.538354	0.916426	0.403751	0.194327	0.27907	0.336442	0.952966	0.000910955	5.25804e-09	0.861286	0.980551
2	1-(1-enyl-palmitoyl)-2-arachidonoyl-GPC (P-16:0/20:4)*	1595	TRUE	-0.600088	0.0461012	-0.0347424	-0.223721	-0.0489178	-0.0894472	-0.158196	-0.141927	0.0134633	-0.000408452	0.00581214	0.539862	0.576242	0.12187	0.531543	0.253779	0.0647844	0.0931117	8.92814e-06	0.943818	0.861286	0.900902
105	1-palmitoyl-2-meadoyl-GPC (16:0/20:3n9)*	1595	TRUE	-1.62623	-0.0450163	-0.083223	-0.0448517	0.0336077	0.0124325	0.138744	0.0326697	0.0168046	0.0292843	2.15585e-14	0.540595	0.171138	0.751214	0.660369	0.871188	0.097783	0.692746	1.45059e-08	2.4049e-07	0.861286	0.609557
428	myristate (14:0)	1595	TRUE	-1.73805	-0.0433619	-0.0456747	-0.34904	-0.333476	-0.336693	-0.1642	-0.101102	0.0312892	0.0140746	8.33671e-17	0.547858	0.443791	0.0118845	8.77136e-06	7.55802e-06	0.0457307	0.21249	5.38106e-27	0.0113734	0.871013	0.824699
527	ribonate	1595	TRUE	-1.12488	-0.044449	-0.0327262	0.0940289	0.0167166	-0.142496	-0.0271358	0.0514523	0.0147933	0.0158342	2.02249e-07	0.552424	0.596671	0.513387	0.829832	0.0676217	0.750161	0.540586	9.30269e-07	0.0060295	0.875045	0.902091
65	1-margaroyl-2-oleoyl-GPC (17:0/18:1)*	1595	TRUE	-1.46221	0.0426611	0.0659376	0.00858145	0.0170184	-0.0769344	0.0294988	-0.130071	0.0342728	-0.011144	2.11012e-12	0.553097	0.267415	0.950529	0.819971	0.304751	0.718808	0.107607	3.00456e-32	0.0443966	0.875045	0.708085
530	serine	1595	TRUE	-0.410531	0.0446023	0.00286924	-0.167118	-0.0770582	-0.178532	0.0110508	-0.0529394	0.0123469	-0.00615609	0.0596596	0.553885	0.963257	0.248766	0.325279	0.0230003	0.897551	0.531877	4.793e-05	0.289103	0.875045	0.990032
726	X - 22822	1595	TRUE	-2.56176	-0.0408033	-0.0700627	0.119463	-0.0318804	-0.0922656	0.0711169	0.0279804	0.0193342	0.0619295	4.31542e-37	0.557641	0.223226	0.372017	0.65947	0.203319	0.369621	0.720525	5.45936e-12	7.64225e-31	0.879133	0.658298
33	15-methylpalmitate	1595	TRUE	-1.59083	-0.0420129	-0.012205	-0.313689	-0.266178	-0.29447	-0.095193	-0.0380658	0.0327813	0.00306714	2.3247e-14	0.559857	0.837643	0.0235869	0.000380787	8.81539e-05	0.246136	0.638326	1.52091e-29	0.580746	0.880779	0.961691
131	1-stearoyl-2-meadoyl-GPC (18:0/20:3n9)*	1595	TRUE	-1.90037	-0.0420469	-0.0621354	0.0491596	0.0550558	0.0586308	0.116807	0.0817804	0.0174526	0.0374382	2.47251e-19	0.564987	0.303597	0.726444	0.468614	0.441356	0.160491	0.31932	3.10439e-09	2.96825e-11	0.881735	0.717539
481	palmitoleate (16:1n7)	1595	TRUE	-2.09457	-0.0413491	-0.0638799	-0.344024	-0.281459	-0.284823	-0.0465663	0.0201622	0.0318965	0.0242789	7.22887e-24	0.565076	0.282268	0.0128065	0.00016542	0.000143305	0.56949	0.802892	3.39537e-28	1.16993e-05	0.881735	0.7123
236	5-methylthioadenosine (MTA)	1595	TRUE	-2.35559	0.0412019	0.0257096	0.175102	0.129888	0.188152	0.0782962	0.291475	0.0198278	0.0457099	1.78276e-29	0.568376	0.666748	0.207431	0.0836854	0.012439	0.341268	0.000329875	9.70625e-12	2.18591e-16	0.881735	0.912692
132	1-stearoyl-2-oleoyl-GPC (18:0/18:1)	1595	TRUE	-1.7091	-0.0414249	0.00858633	-0.0188718	0.00272293	-0.0896262	0.0840319	-0.0737361	0.0229968	0.0213585	6.45829e-16	0.570986	0.88702	0.893223	0.971424	0.239507	0.312958	0.369524	6.00346e-15	0.000150336	0.881735	0.975004
707	X - 21441	1595	TRUE	0.593803	0.0421984	-0.0234745	-0.107325	0.101779	0.0927157	0.015512	0.0358109	-0.016725	0.00809314	0.00585665	0.571019	0.703	0.453675	0.188735	0.232337	0.854928	0.668803	2.53217e-08	0.158585	0.881735	0.922611
342	gamma-glutamylphenylalanine	1595	TRUE	-2.61064	0.0399427	0.0284463	-0.0419826	-0.12113	-0.172485	-0.207207	-0.10924	0.0314571	0.0430571	1.96366e-37	0.571428	0.625834	0.757071	0.0987796	0.0190304	0.00995286	0.168452	1.99959e-28	2.45596e-15	0.881735	0.907897
220	4-methyl-2-oxopentanoate	1595	TRUE	-0.0103692	0.0423912	-0.0796287	-0.0181592	-0.0348538	-0.00358338	-0.0958889	-0.309265	0.00378891	-0.00389555	0.961921	0.572299	0.199431	0.899903	0.655199	0.963471	0.262148	0.00024694	0.210512	0.500766	0.881735	0.63818
711	X - 21628	1595	TRUE	-1.06011	-0.0420828	-0.079791	0.135315	0.0475998	0.0854657	-0.228569	0.0427517	0.0130508	0.0160874	9.23399e-07	0.573045	0.196116	0.346023	0.539789	0.272124	0.00720409	0.610461	1.44962e-05	0.00518381	0.881735	0.63818
104	1-palmitoyl-2-linoleoyl-GPI (16:0/18:2)	1595	TRUE	-1.11067	-0.0416084	-0.00188013	-0.0735193	-0.0739454	-0.120784	-0.0327761	-0.136411	0.00623484	0.0344808	2.09202e-07	0.573709	0.975466	0.605206	0.33621	0.117118	0.697229	0.100773	0.0364783	1.45468e-09	0.881735	0.992625
519	pyroglutamylglutamine	1595	TRUE	-1.2889	0.0419138	0.00964489	-0.226284	-0.0272035	-0.119047	0.144992	0.118062	0.014159	0.0218613	2.24707e-09	0.573789	0.875573	0.114307	0.725485	0.125307	0.0875977	0.15862	2.42615e-06	0.000140886	0.881735	0.973719
696	X - 18901	1595	TRUE	0.27428	0.0419058	0.00767361	-0.217916	-0.0548328	-0.0379974	0.0213833	-0.088012	0.00832399	-0.0261139	0.204017	0.574499	0.90102	0.128964	0.479818	0.625232	0.801422	0.294103	0.00566004	5.63815e-06	0.881735	0.975004
161	2-linoleoylglycerol (18:2)	1595	TRUE	-1.22886	-0.0420564	0.179362	0.0869046	0.0029935	0.212238	0.19617	0.0394927	0.0151229	0.012264	1.4285e-08	0.574535	0.00377479	0.546355	0.969342	0.00656269	0.0215142	0.639034	5.49144e-07	0.0336623	0.881735	0.194881
450	N-acetylisoleucine	1595	TRUE	-1.47828	0.0409536	0.0137542	0.121876	-0.0692294	-0.220006	-0.0460211	-0.0123937	0.0137863	0.0322389	3.45545e-12	0.577083	0.820758	0.388151	0.364565	0.00404827	0.582223	0.880641	3.20191e-06	1.22726e-08	0.88315	0.961691
165	2-methylbutyrylglycine	1595	TRUE	-0.527599	0.0407775	0.143244	0.220952	-0.0692493	-0.187873	-0.114954	-0.107699	0.00713871	0.00852864	0.0128016	0.577806	0.0180144	0.116813	0.363271	0.0138751	0.168362	0.190877	0.0156281	0.130927	0.88315	0.371908
163	2-linoleoyl-GPE (18:2)*	1595	TRUE	0.469015	0.0418934	0.141609	-0.0586938	-0.0466209	-0.0604269	-0.104847	-0.134633	-0.00432825	-0.00853396	0.0317784	0.578991	0.0232713	0.686035	0.552573	0.442545	0.222804	0.112606	0.154953	0.142497	0.883167	0.371908
440	N-acetylalanine	1595	TRUE	-1.62281	0.0403039	-0.0427729	0.133493	-0.125135	-0.118657	-0.0260787	0.0218967	0.0158557	0.0336448	1.59185e-14	0.581079	0.478667	0.341902	0.0993799	0.119057	0.753935	0.789667	7.21025e-08	2.27509e-09	0.884558	0.827688
640	X - 12462	1595	TRUE	0.167027	-0.0411158	0.00646684	0.178671	0.134854	0.238796	-0.0324093	-0.0730538	-0.000186077	-0.00914774	0.441402	0.583528	0.916919	0.215393	0.083715	0.00224976	0.704404	0.386097	0.950915	0.1135	0.886491	0.980551
574	tiglylcarnitine (C5:1-DC)	1595	TRUE	-1.88204	0.0389467	0.0241762	0.0462157	-0.0359249	-0.140031	-0.0350341	-0.118018	0.0304563	0.0139177	1.39682e-19	0.587847	0.684017	0.73806	0.630636	0.0615332	0.668658	0.143953	7.38516e-26	0.0119747	0.887928	0.921689
288	cis-4-decenoylcarnitine (C10:1)	1595	TRUE	-2.02164	0.0394343	-0.07395	-0.133006	-0.167066	-0.185436	-0.0546348	-0.0190788	0.0306482	0.0212551	8.00043e-22	0.587996	0.219069	0.342026	0.0272764	0.0145141	0.509945	0.8156	1.5281e-25	0.000151417	0.887928	0.658154
621	X - 11805	1595	TRUE	-1.51756	-0.0400013	-0.00775252	-0.0270856	-0.0817895	-0.150297	0.0917259	0.0116095	0.0141661	0.0323704	1.34889e-12	0.58878	0.899139	0.849034	0.287701	0.0513041	0.276468	0.888974	2.03522e-06	1.37642e-08	0.887928	0.975004
406	leucine	1595	TRUE	-2.41773	0.038281	-0.0646142	-0.135077	-0.212086	-0.316529	-0.117295	-0.219707	0.0301483	0.0411484	5.94711e-32	0.589961	0.271164	0.322758	0.00408304	1.90841e-05	0.147172	0.0059245	6.31496e-26	5.6499e-14	0.887928	0.708818
192	3-indoxyl sulfate	1595	TRUE	-0.0584899	-0.0399334	0.0274093	0.0967919	0.0212067	-0.0744721	0.034044	-0.0108763	-0.00163366	0.00580819	0.78593	0.591641	0.655997	0.498937	0.784071	0.337098	0.68805	0.896563	0.586105	0.311346	0.887928	0.907897
699	X - 19141	1595	TRUE	-0.590997	0.0402112	0.0885373	-0.135333	-0.070296	-0.114281	-0.100861	-0.0795779	0.00666784	0.0119117	0.00657651	0.592701	0.154199	0.349177	0.368409	0.144654	0.238826	0.346234	0.0277577	0.0397781	0.887928	0.597464
188	3-hydroxyisobutyrate	1595	TRUE	-1.72126	-0.0388568	-0.112242	-0.222594	-0.161807	-0.199061	-0.232595	-0.144186	0.0272236	0.0191159	2.61618e-16	0.592739	0.0616081	0.111085	0.0321686	0.00856141	0.00494205	0.0774039	1.44116e-20	0.000639707	0.887928	0.45279
566	theanine	1595	TRUE	-0.699913	-0.0399283	0.0100872	0.0212687	-0.173663	-0.124914	-0.160972	-0.180839	0.0143854	0.00389239	0.00130449	0.595694	0.871176	0.883152	0.0264368	0.111224	0.0603865	0.032498	2.10728e-06	0.502127	0.889078	0.973439
320	eicosapentaenoate (EPA; 20:5n3)	1595	TRUE	-2.05678	0.0375155	0.100374	-0.0308902	-0.0396641	0.0160248	-0.0579221	0.0679585	0.0391817	0.000784774	1.44739e-23	0.59753	0.0874764	0.821157	0.591341	0.828691	0.47423	0.394797	1.33026e-42	0.886054	0.889078	0.490482
552	stearoylcarnitine (C18)	1595	TRUE	-0.87978	-0.0387215	0.0414475	-0.0971123	0.0166332	-0.129058	0.0433459	-0.0806918	0.0202639	-0.00573919	3.60105e-05	0.598826	0.495717	0.492644	0.827925	0.0924905	0.605146	0.329331	8.45771e-12	0.311662	0.889078	0.838717
466	nonadecanoate (19:0)	1595	TRUE	-0.711229	-0.0382788	-0.00447566	-0.241924	-0.180996	-0.216092	-0.116209	-0.00477845	0.0280797	-0.024109	0.000742308	0.5994	0.940774	0.0842981	0.0169007	0.00443979	0.161535	0.953476	1.18218e-21	1.76675e-05	0.889078	0.982882
29	10-nonadecenoate (19:1n9)	1595	TRUE	-1.72909	-0.0378687	-0.0608244	-0.235774	-0.289403	-0.251608	-0.0971955	-0.0222965	0.0334893	0.00687651	1.1356e-16	0.599419	0.307451	0.0890335	0.000113004	0.000812795	0.236612	0.783193	9.97302e-31	0.215892	0.889078	0.717539
452	N-acetylmethionine	1595	TRUE	-0.102457	0.0392129	-0.0930994	-0.09033	0.0381956	-0.0470889	-0.00262285	0.0331839	0.00148862	0.00188916	0.639107	0.603597	0.13587	0.533952	0.626637	0.549664	0.975676	0.695824	0.624812	0.745502	0.891637	0.563485
232	5-HETE	1595	TRUE	-0.944509	0.0384905	0.0298498	0.064829	0.187952	0.0390781	-0.174894	0.244041	0.00774833	0.0181461	1.20578e-05	0.605869	0.628329	0.651328	0.015375	0.615223	0.0395652	0.00360484	0.00996635	0.00159809	0.891637	0.907897
624	X - 11871	1595	TRUE	0.0988059	-0.0383634	0.182405	0.150186	0.0586724	0.121659	0.0242643	-0.102427	0.00708063	-0.0211475	0.646857	0.606824	0.00307611	0.294814	0.449047	0.117389	0.775075	0.221517	0.0184498	0.000232573	0.891637	0.194881
708	X - 21444	1595	TRUE	-0.389161	-0.0387379	-0.105849	-0.0484962	-0.0315012	-0.0476279	-0.00240546	-0.0627124	0.00447781	0.00882702	0.0748068	0.607898	0.0898816	0.738369	0.688194	0.545002	0.977686	0.459877	0.141176	0.129279	0.891637	0.49544
8	1-(1-enyl-palmitoyl)-2-oleoyl-GPC (P-16:0/18:1)*	1595	TRUE	0.448561	0.0371057	-0.0189214	-0.594456	0.0477806	-0.025801	0.0702303	-0.0824509	0.0142617	-0.0453924	0.0333529	0.610597	0.753419	2.21289e-05	0.528239	0.734057	0.397481	0.31404	1.19889e-06	6.33146e-16	0.891637	0.955116
709	X - 21448	1595	TRUE	0.673437	-0.0379394	0.0012482	0.0129535	0.13238	0.0370171	0.0159808	0.0317863	0.00173917	-0.0318413	0.00184766	0.611816	0.983885	0.928207	0.0885378	0.634725	0.851142	0.705202	0.563828	3.27068e-08	0.891637	0.994465
683	X - 17145	1595	TRUE	0.00894492	0.0377315	0.0620084	-0.190414	0.0214208	0.0145991	0.124153	0.0261453	0.0131659	-0.0286023	0.966957	0.613184	0.314867	0.184625	0.782511	0.851131	0.1442	0.755282	1.2062e-05	6.61591e-07	0.891637	0.72189
95	1-palmitoyl-2-arachidonoyl-GPI (16:0/20:4)*	1595	TRUE	-2.08474	-0.03655	0.00569562	0.141129	-0.0480526	-0.168151	-0.0624527	-0.113974	0.0197272	0.0447903	2.29875e-23	0.613458	0.924134	0.310453	0.52297	0.025761	0.448602	0.161053	1.34016e-11	9.59213e-16	0.891637	0.980551
286	choline phosphate	1595	TRUE	0.292935	0.0379662	0.00108495	-0.0629505	-0.0620964	0.0379729	0.0687388	-0.0384461	0.00229996	-0.0156105	0.178396	0.613853	0.986083	0.663522	0.427321	0.628227	0.422545	0.649374	0.44823	0.00710421	0.891637	0.995348
202	3-methylhistidine	1595	TRUE	-0.73922	0.0377077	-0.0688027	0.159147	0.149985	0.0697406	-0.0669585	0.118095	0.00605351	0.0144948	0.000657615	0.61515	0.267121	0.269866	0.0544348	0.372317	0.433203	0.161235	0.0452451	0.0121602	0.891637	0.708085
176	2-stearoyl-GPE (18:0)*	1595	TRUE	-1.14071	0.0375982	0.141175	-0.145378	-0.131757	-0.0309075	0.0396473	-0.00663975	0.0151993	0.0138759	1.35215e-07	0.61519	0.0224081	0.312145	0.0901999	0.691748	0.641678	0.937044	4.61514e-07	0.0160791	0.891637	0.371908
627	X - 12026	1595	TRUE	-2.55352	0.0360984	-0.0603244	0.109922	-0.0284938	0.0549821	-0.023732	0.0349147	0.0296661	0.0402148	1.09425e-34	0.615372	0.309768	0.426286	0.702873	0.462802	0.771836	0.665468	1.26018e-24	3.8048e-13	0.891637	0.717539
311	dihydroorotate	1595	TRUE	-0.900439	-0.0372047	-0.0106014	0.108038	-0.0235306	-0.0937061	-0.00296101	0.00684959	0.00845575	0.0179811	2.82954e-05	0.616745	0.863029	0.449809	0.760786	0.226493	0.972106	0.934661	0.00477245	0.00169878	0.891798	0.96721
56	1-linolenoylglycerol (18:3)	1595	TRUE	-2.1352	0.0363251	0.128282	0.193621	0.00375438	0.00691504	0.248813	0.0654761	0.0209643	0.0372532	3.80705e-24	0.617855	0.0330563	0.16672	0.960445	0.927394	0.00269978	0.423638	9.10178e-13	3.16678e-11	0.891798	0.404457
388	imidazole lactate	1595	TRUE	-0.213419	0.0372016	-0.0632243	-0.231617	-0.0497438	-0.0487323	-0.0580642	-0.122433	0.00617345	-0.00163567	0.324967	0.619628	0.307472	0.108042	0.523215	0.532703	0.496409	0.14608	0.0409889	0.777041	0.892645	0.717539
444	N-acetylcarnosine	1595	TRUE	-0.946312	0.0355342	-0.0260051	0.21665	0.0391938	-0.0212978	0.0237748	-0.121584	-0.00119634	0.0381166	5.50467e-06	0.621521	0.662048	0.117525	0.600445	0.776477	0.771828	0.132837	0.680064	6.36227e-12	0.892834	0.910165
72	1-methylurate	1595	TRUE	-0.779381	0.0368718	-0.106765	0.121628	-0.19687	0.0224147	-0.117411	-0.0776164	0.0138338	0.00607966	0.000317257	0.622134	0.084286	0.397907	0.0113752	0.773763	0.168294	0.355977	4.48733e-06	0.291714	0.892834	0.490437
289	cis-aconitate	1595	TRUE	-1.43475	0.0350518	-0.0364061	-0.089533	0.0381536	0.0515866	-0.083952	0.195279	0.0264194	0.00161804	9.85984e-12	0.630361	0.545412	0.522703	0.614392	0.496804	0.311617	0.0170605	2.2832e-19	0.773174	0.901175	0.88777
144	2-aminophenol sulfate	1595	TRUE	-0.386612	-0.0353967	-0.021023	-0.140359	0.0967441	-0.131229	0.0136169	-0.0159457	0.0134552	-0.0120203	0.0701198	0.631423	0.730332	0.322569	0.207265	0.0879207	0.871295	0.847518	6.06121e-06	0.034535	0.901175	0.940196
159	2-hydroxystearate	1595	TRUE	-0.20528	-0.036176	0.071959	-0.00408758	-0.0468688	0.0262463	-0.00393038	-0.00887723	0.00723781	-0.00696936	0.347492	0.63196	0.249083	0.977548	0.550599	0.738816	0.963562	0.916711	0.01743	0.231201	0.901175	0.681864
737	X - 23782	1595	TRUE	-1.34483	0.0350495	0.0271931	-0.0666757	-0.165931	-0.0856868	-0.152551	0.0489965	0.0313033	-0.00762902	2.32951e-10	0.63274	0.653773	0.636408	0.0295542	0.262311	0.0678548	0.552252	3.35655e-26	0.177137	0.901175	0.907897
38	1-arachidonoyl-GPA (20:4)	1595	TRUE	-0.515825	0.0353345	-0.0878384	-0.17858	-0.0259275	-0.217137	0.139866	0.107546	0.00846677	0.00415109	0.0170073	0.636245	0.154927	0.213874	0.738531	0.00529273	0.100271	0.200253	0.00492832	0.47095	0.903993	0.597464
83	1-oleoyl-2-linoleoyl-GPC (18:1/18:2)*	1595	TRUE	1.23245	-0.0350445	0.0546699	-0.0810368	0.0272153	0.0601757	0.0255526	-0.0827105	-0.00178403	-0.0453968	9.78794e-09	0.637123	0.373328	0.570554	0.724569	0.437044	0.762682	0.321874	0.55131	2.21303e-15	0.903993	0.775532
321	eicosenoate (20:1)	1595	TRUE	-1.54945	-0.0336891	-0.0612701	-0.230272	-0.257005	-0.237067	-0.106521	0.0126199	0.0321852	0.00173468	1.62576e-13	0.642651	0.307317	0.0991033	0.000662574	0.00173146	0.197755	0.877096	3.91352e-28	0.756564	0.909193	0.717539
201	3-methylglutarylcarnitine (2)	1595	TRUE	-1.82141	-0.03361	0.0898265	0.230304	0.0608689	0.178901	0.116824	0.155246	0.0299776	0.00649097	4.05953e-18	0.643206	0.134214	0.0988268	0.419725	0.017993	0.157505	0.0569398	1.17768e-24	0.245741	0.909193	0.563485
577	trigonelline (N'-methylnicotinate)	1595	TRUE	-0.403444	0.0343124	-0.00410887	0.104408	-0.0896373	-0.0893706	-0.114415	-0.0781996	0.0175339	-0.016698	0.062619	0.64687	0.947087	0.468524	0.249688	0.252262	0.179895	0.352904	6.32039e-09	0.00381967	0.912657	0.985038
730	X - 23369	1595	TRUE	-0.632041	-0.0338354	0.122138	0.126594	-0.0481313	-0.0300188	-0.118573	-0.0529409	0.00576298	0.0136173	0.00351151	0.651212	0.048359	0.379094	0.536214	0.700359	0.164277	0.529105	0.0560857	0.0182395	0.915563	0.424419
86	1-oleoyl-GPC (18:1)	1595	TRUE	-0.211161	-0.0335954	0.105233	0.0616426	0.0699752	0.0733876	0.0768991	0.0115078	0.0147349	-0.024313	0.328085	0.652607	0.0880519	0.667559	0.367155	0.345436	0.365697	0.890877	9.66807e-07	2.36955e-05	0.915563	0.490482
341	gamma-glutamylmethionine	1595	TRUE	-1.37181	0.0329611	-0.0113841	-0.146423	0.0320805	-0.226968	-0.0865725	-0.0272101	0.02371	0.00785049	9.87023e-11	0.652949	0.850968	0.298921	0.673788	0.0029689	0.299803	0.741181	1.01449e-15	0.164641	0.915563	0.963221
433	N1-Methyl-2-pyridone-5-carboxamide	1595	TRUE	-1.97207	-0.0326184	-0.0295249	-0.0906367	0.0214123	-0.0308624	-0.00157497	-0.0306386	0.0230086	0.0314766	7.99763e-21	0.654244	0.623828	0.517531	0.77734	0.684306	0.984853	0.708171	4.57382e-15	2.04916e-08	0.915563	0.907897
69	1-methylhistidine	1595	TRUE	-1.92337	0.0324118	-0.0621865	0.110739	0.0273376	-0.137756	-0.00714469	0.0436101	0.0256766	0.0243648	4.96453e-20	0.655017	0.299705	0.427298	0.716998	0.068447	0.931096	0.592718	1.61043e-18	1.3126e-05	0.915563	0.717539
436	N6,N6,N6-trimethyllysine	1595	TRUE	-1.62012	-0.0321927	0.0379241	-0.0680081	-0.0466687	-0.117481	-0.0107592	0.0403128	0.0161147	0.0313662	9.88466e-15	0.65633	0.525975	0.62496	0.534952	0.11921	0.896123	0.620037	3.27009e-08	1.84958e-08	0.915697	0.864484
324	erucate (22:1n9)	1595	TRUE	-0.959537	0.0319501	-0.0305855	-0.145095	-0.232188	-0.179176	-0.164794	-0.0553574	0.0320173	-0.0218665	5.08359e-06	0.660377	0.610854	0.299439	0.00213122	0.018065	0.046633	0.498166	8.82405e-28	9.54558e-05	0.919636	0.907897
557	sulfate*	1595	TRUE	-1.66759	0.032046	-0.0471437	0.124735	0.0336432	-0.079905	-0.11425	0.0427477	0.024761	0.0163539	4.50017e-15	0.662927	0.437909	0.377644	0.659837	0.297041	0.17249	0.60492	6.50348e-17	0.00389964	0.921481	0.824699
71	1-methylnicotinamide	1595	TRUE	0.474178	-0.0325719	-0.0847116	-0.167498	-0.0145227	0.0776311	0.0945361	0.0240139	0.00125397	-0.0215282	0.0296111	0.665538	0.173807	0.247696	0.852928	0.322886	0.270699	0.776741	0.679686	0.0002096	0.922358	0.609557
39	1-arachidonoyl-GPC (20:4n6)*	1595	TRUE	-0.645843	-0.032519	0.0267935	0.228734	0.00951602	0.0192974	-0.107093	-0.0159414	0.0120322	0.00137446	0.00304548	0.666011	0.667028	0.114391	0.903305	0.805868	0.212067	0.850667	7.42327e-05	0.812881	0.922358	0.912692
336	gamma-glutamylglutamine	1595	TRUE	-0.628202	0.0316806	0.0209395	-0.210959	-0.0252517	-0.155022	-0.107151	-0.0887432	0.0204825	-0.0144361	0.00325656	0.667711	0.731402	0.137143	0.742066	0.0438478	0.202422	0.284637	5.73734e-12	0.0111436	0.923013	0.940196
241	7-hydroxycholesterol (alpha or beta)	1595	TRUE	-0.626928	0.0315866	0.0922381	0.110253	0.0222929	-0.0701078	-0.263091	0.0689632	0.00668945	0.011561	0.00364881	0.671763	0.134419	0.44183	0.77362	0.366854	0.00194566	0.410425	0.0259876	0.0441878	0.924013	0.563485
199	3-methylglutaconate	1595	TRUE	-0.0276792	0.0317306	0.0434027	0.190621	0.0552608	-0.142563	0.0653206	-0.0114214	0.00338542	-0.00569277	0.898623	0.672644	0.484444	0.186856	0.47909	0.0685395	0.445104	0.892359	0.263382	0.325327	0.924013	0.831739
254	androsterone sulfate	1595	TRUE	1.11002	-0.0312653	-0.0319208	0.0386501	0.0379977	0.0279345	-0.0381502	-0.134362	-0.0251719	0.00754268	2.36614e-07	0.673667	0.60297	0.786613	0.622527	0.718089	0.651906	0.107342	4.03842e-17	0.187436	0.924013	0.904612
186	3-hydroxydecanoate	1595	TRUE	-1.6154	-0.0303905	-0.0136741	-0.347969	-0.243711	-0.175821	-0.0852954	-0.0134588	0.0288186	0.0102494	1.76982e-14	0.676493	0.82033	0.0129785	0.00128907	0.0205486	0.303903	0.869404	9.54903e-23	0.0678676	0.924013	0.961691
639	X - 12450	1595	TRUE	-2.05566	-0.0297683	-0.0647276	-0.214663	-0.262932	-0.200661	-0.109821	-0.0469386	0.0324828	0.0212988	7.82511e-23	0.680264	0.278355	0.122267	0.000463448	0.00769109	0.181976	0.563149	6.64809e-29	0.000130365	0.924013	0.711028
518	pyroglutamine*	1595	TRUE	-0.210532	-0.0294782	-0.0542304	0.140151	-0.0458452	-0.0467224	-0.0372824	-0.104274	0.00731344	-0.00641892	0.309176	0.680381	0.359245	0.308459	0.537751	0.531007	0.647391	0.19479	0.0112246	0.244471	0.924013	0.766745
463	N-formylphenylalanine	1595	TRUE	-1.19136	-0.0305075	-0.0239434	-0.0232317	-0.224064	-0.177266	-0.202523	-0.137304	0.0116937	0.0293555	2.86692e-08	0.680991	0.696289	0.870678	0.00368171	0.0219046	0.0165781	0.0997009	9.24428e-05	2.8545e-07	0.924013	0.921689
453	N-acetylneuraminate	1595	TRUE	-1.82321	0.0300584	-0.0254091	0.0402227	0.0626766	-0.155346	0.0342963	0.101072	0.0185338	0.0335937	8.09057e-18	0.681728	0.674933	0.775359	0.410791	0.0419911	0.681224	0.219836	3.52672e-10	2.73083e-09	0.924013	0.917811
6	1-(1-enyl-palmitoyl)-2-linoleoyl-GPC (P-16:0/18:2)*	1595	TRUE	1.13348	0.029988	-0.0051294	-0.519356	0.0561355	-0.0283474	-0.0804039	-0.207636	0.00056583	-0.0434833	9.10933e-08	0.682538	0.932553	0.000230096	0.461482	0.710665	0.335686	0.0117445	0.848161	1.4143e-14	0.924013	0.980811
714	X - 21735	1595	TRUE	-1.37554	0.0303449	-0.0447123	-0.0684453	-0.0715998	-0.0735089	0.0208704	0.104422	0.0189329	0.0164887	1.58735e-10	0.683092	0.466787	0.63205	0.354179	0.342677	0.805296	0.211306	2.62454e-10	0.00399842	0.924013	0.824699
278	caprylate (8:0)	1595	TRUE	-0.696563	-0.0301552	0.0125834	-0.183984	-0.37622	-0.494998	-0.358683	-0.359512	0.0219294	-0.00330909	0.00112501	0.683311	0.836838	0.195561	9.81098e-07	1.31716e-10	2.04509e-05	1.50858e-05	1.8345e-13	0.561342	0.924013	0.961691
370	guanidinoacetate	1595	TRUE	0.696285	-0.0299595	-0.0260466	-0.0578147	-0.0220537	0.0395128	-0.0335074	-0.0441842	0.00570688	-0.0389216	0.00110527	0.684678	0.669304	0.683635	0.773713	0.607335	0.690096	0.594119	0.0549641	7.63584e-12	0.924013	0.91346
443	N-acetyl-beta-alanine	1595	TRUE	-0.542546	-0.03022	0.00760454	0.0239494	0.262236	0.106587	0.0762714	0.113623	0.00526115	0.00556071	0.0117686	0.684801	0.901655	0.867147	0.000704069	0.169538	0.368437	0.174475	0.0795518	0.332474	0.924013	0.975004
460	N-acetylvaline	1595	TRUE	-2.44991	0.0284146	0.009847	0.0693571	-0.170823	-0.155307	-0.178283	-0.0846105	0.0231841	0.0530512	3.04717e-33	0.686892	0.865809	0.608917	0.0197669	0.0345274	0.0264021	0.285551	3.36497e-16	1.59844e-22	0.924013	0.968881
77	1-myristoyl-GPC (14:0)	1595	TRUE	-1.57331	0.0293608	0.0980633	-0.200325	0.000596987	-0.123197	-0.00125641	-0.0722242	0.0210389	0.0204678	1.14666e-13	0.688603	0.105395	0.155068	0.993747	0.106653	0.987988	0.380415	1.044e-12	0.000289115	0.924013	0.521268
476	orotate	1595	TRUE	-0.317028	-0.0301507	-0.0411769	0.00137208	-0.00738272	-0.102718	-0.0023945	-0.00923957	0.0059643	0.00181752	0.14561	0.688872	0.508288	0.99244	0.924873	0.190607	0.97773	0.913067	0.0494108	0.754156	0.924013	0.840072
371	guanidinosuccinate	1595	TRUE	-0.66245	-0.0292554	-0.0130795	-0.0868282	0.128596	0.11415	0.151341	0.072023	0.0275131	-0.032588	0.00176941	0.689567	0.828956	0.537575	0.0912556	0.134805	0.0696678	0.381589	1.16355e-20	7.77649e-09	0.924013	0.961691
632	X - 12206	1595	TRUE	-1.07736	-0.0295909	0.025585	-0.0129132	0.0514008	-0.0335782	-0.12202	-0.0398294	0.0196121	0.00383143	5.4398e-07	0.690552	0.677108	0.928016	0.50596	0.664689	0.149532	0.633518	5.90061e-11	0.503606	0.924013	0.918869
64	1-margaroyl-2-linoleoyl-GPC (17:0/18:2)*	1595	TRUE	-0.541227	-0.0277901	0.0923924	-0.150553	0.0808437	-0.027719	0.00505116	-0.174808	0.0272262	-0.0329738	0.00909139	0.698387	0.119108	0.274989	0.278253	0.71075	0.950696	0.0300988	4.56205e-21	2.43567e-09	0.929856	0.556958
416	malonate	1595	TRUE	-0.91277	-0.0287429	0.0118301	-0.0256594	-0.23566	-0.0426675	-0.285123	0.0448252	0.0130944	0.0137505	2.58589e-05	0.701514	0.848652	0.858781	0.00250672	0.58513	0.000844415	0.594839	1.47723e-05	0.0173547	0.929856	0.962573
356	glycerol 3-phosphate	1595	TRUE	0.358081	0.0283337	-0.115996	-0.118053	0.0277835	0.0325266	0.095584	-0.0215123	0.00647213	-0.0266058	0.0977899	0.704683	0.0605052	0.411551	0.720743	0.676337	0.261661	0.797921	0.03172	3.8789e-06	0.929856	0.45279
666	X - 15469	1595	TRUE	-1.62839	0.0274026	-0.0966853	-0.274376	-0.166978	-0.230935	-0.0703862	-0.033578	0.0286153	0.0107002	7.40025e-15	0.704958	0.106056	0.0486707	0.026474	0.00220099	0.393205	0.679739	1.02241e-22	0.0550638	0.929856	0.521268
266	benzoate	1595	TRUE	-0.234954	0.0286283	-0.0152486	0.00342239	0.0453707	0.0753781	0.0274623	-0.00580256	0.00367271	0.000516426	0.282975	0.70508	0.807329	0.981229	0.563993	0.339001	0.749932	0.945583	0.228348	0.929412	0.929856	0.961691
723	X - 22771	1595	TRUE	1.13295	0.0278267	-0.0310557	0.00997765	0.130287	0.243186	0.147527	-0.0233232	-0.0126145	-0.0233469	1.44997e-07	0.708649	0.613905	0.944453	0.0924148	0.00172842	0.0820019	0.780498	2.63802e-05	4.74426e-05	0.929856	0.907897
366	glycoursodeoxycholate	1595	TRUE	0.0885704	0.0281766	0.0283628	0.370966	0.0562575	-0.00298208	0.0542241	-0.00483078	-0.00543824	0.00569067	0.684777	0.708688	0.649128	0.0105301	0.473064	0.969735	0.527898	0.95455	0.0736047	0.327543	0.929856	0.907897
59	1-linoleoylglycerol (18:2)	1595	TRUE	-1.72936	-0.027059	0.198019	0.182353	-0.0891887	0.0695376	0.167236	0.0868542	0.0212002	0.0210791	1.97329e-16	0.7097	0.00098198	0.192047	0.23793	0.358674	0.0434026	0.287709	4.61971e-13	0.000168092	0.929856	0.194881
162	2-linoleoyl-GPC (18:2)*	1595	TRUE	0.745384	-0.0277711	0.119751	-0.152618	-0.0781738	-0.0893871	-0.0320637	-0.122481	-0.00128692	-0.0249457	0.000558303	0.709905	0.0523217	0.287765	0.313861	0.250638	0.706141	0.144364	0.668892	1.45438e-05	0.929856	0.437177
145	2-arachidonoylglycerol (20:4)	1595	TRUE	-0.922949	0.0274405	0.166229	0.116244	-0.150555	0.122799	-0.145755	-0.102832	0.0119414	0.0118984	1.91018e-05	0.713081	0.00704244	0.417914	0.0523127	0.114353	0.0863932	0.22016	7.18245e-05	0.0385607	0.929856	0.230257
422	methionine sulfoxide	1595	TRUE	-0.689587	0.0274464	0.0566624	-0.0848504	-0.0871511	-0.143073	-0.128109	-0.00647326	0.00830349	0.0125605	0.00143645	0.713621	0.359364	0.555199	0.262346	0.0664196	0.132621	0.938612	0.0058757	0.0293174	0.929856	0.766745
331	gamma-CEHC	1595	TRUE	0.183732	0.0272678	0.0658717	0.0765437	0.015939	0.0660405	-0.0622437	0.00692108	-0.0125857	0.0170028	0.395349	0.715159	0.286196	0.594237	0.837433	0.396417	0.464582	0.934316	2.92811e-05	0.00315148	0.929856	0.715014
238	5-oxoproline	1595	TRUE	-0.765519	0.0268137	-0.0382791	-0.131252	-0.0183091	-0.231675	0.0185757	-0.0434356	0.0143901	0.00338568	0.000387983	0.719187	0.534633	0.360089	0.813325	0.0028762	0.826907	0.604303	1.6906e-06	0.555826	0.929856	0.874009
425	methyl-4-hydroxybenzoate sulfate	1595	TRUE	0.822608	0.0260225	0.103324	-0.177178	-0.0163571	0.0439329	0.109855	0.0212473	0.000319052	-0.0334313	8.67181e-05	0.719436	0.0844465	0.203438	0.82807	0.560648	0.183094	0.79412	0.91299	2.12664e-09	0.929856	0.490437
641	X - 12472	1595	TRUE	-0.957517	0.0267403	-0.134286	-0.0511387	-0.10518	0.0854837	-0.0186178	0.145502	0.0155228	0.00687952	9.16359e-06	0.720044	0.0294547	0.721526	0.175123	0.27163	0.826598	0.08271	2.44648e-07	0.231547	0.929856	0.402726
634	X - 12216	1595	TRUE	-0.198791	0.0266676	0.0046641	-0.024125	0.0734928	0.00641945	0.169779	0.0639641	0.0150081	-0.0248622	0.35822	0.721414	0.939861	0.866787	0.344574	0.934363	0.0462698	0.446672	6.40185e-07	1.60823e-05	0.929856	0.982882
710	X - 21626	1595	TRUE	0.0915207	0.0267758	0.0370349	0.251509	0.0851082	0.122522	-0.229869	0.0947921	-0.00695082	0.00836552	0.6755	0.723104	0.553273	0.0835124	0.278707	0.119802	0.00757659	0.264392	0.0224915	0.150912	0.929856	0.893289
602	X - 11372	1595	TRUE	0.675513	-0.0261195	-0.0190856	0.206471	-0.121905	-0.116378	0.0122613	-0.0308753	-0.0209844	0.0177998	0.00158136	0.723781	0.754733	0.146299	0.112628	0.130824	0.884201	0.710112	1.86387e-12	0.00177848	0.929856	0.955116
166	2-methylcitrate/homocitrate	1595	TRUE	-0.763998	0.0261756	0.0600579	0.233172	0.0541677	0.108129	-0.19239	0.0763357	0.00730106	0.0136669	0.000380096	0.724671	0.328241	0.102767	0.483256	0.162699	0.0230418	0.360742	0.0147915	0.0170247	0.929856	0.739396
152	2-hydroxybutyrate/2-hydroxyisobutyrate	1595	TRUE	-2.18773	-0.0252119	-0.204061	-0.103395	-0.0450275	-0.118424	-0.174445	0.00330869	0.0267152	0.035806	8.63871e-26	0.726287	0.000608656	0.455336	0.547605	0.114634	0.0334667	0.967394	3.47794e-20	1.11229e-10	0.929856	0.194881
398	isovalerate	1595	TRUE	-0.8852	0.0259801	0.0339175	-0.0258109	-0.153523	-0.158947	-0.042927	0.120661	0.0102759	0.0153403	3.84491e-05	0.726687	0.580919	0.856699	0.0469576	0.0401854	0.612138	0.148621	0.000603473	0.00740822	0.929856	0.902091
387	hypoxanthine	1595	TRUE	-0.582571	0.026171	-0.0290665	-0.102782	0.0221743	-0.179023	0.00572255	0.0145409	0.00325592	0.0179415	0.00735613	0.727584	0.639763	0.476837	0.776501	0.0222372	0.946686	0.863275	0.282289	0.0019449	0.929856	0.907897
725	X - 22816	1595	TRUE	-1.03381	-0.025613	-0.0123501	-0.221743	-0.208704	-0.141236	-0.0404584	-0.060766	0.0266689	-0.00882754	1.21053e-06	0.727908	0.839179	0.117285	0.00639689	0.0656603	0.629479	0.462696	2.52904e-19	0.119753	0.929856	0.961865
662	X - 14568	1595	TRUE	0.0378498	0.0264701	0.00948696	-0.120882	-0.046677	0.0370625	-0.0492963	-0.0942874	-0.00358958	0.00675175	0.863765	0.728475	0.880355	0.409711	0.555991	0.640944	0.57032	0.27122	0.242812	0.250584	0.929856	0.973719
329	fructose	1595	TRUE	-0.200688	0.0263314	-0.0551195	0.130917	-0.00393174	-0.0359152	-0.104976	-0.0942106	-0.00173715	0.0135345	0.361477	0.72905	0.380383	0.370481	0.960323	0.650316	0.225379	0.270149	0.570737	0.0208788	0.929856	0.784866
400	isovalerylglycine	1595	TRUE	-1.05884	0.025719	-0.0110371	-0.055193	-0.185632	-0.266437	-0.297805	-0.160847	0.0122916	0.0234339	8.97177e-07	0.729915	0.857754	0.70004	0.0165413	0.000599997	0.000448962	0.0547175	4.24778e-05	4.47423e-05	0.929856	0.965616
693	X - 17351	1595	TRUE	-1.07456	-0.0257326	0.0365185	0.00153639	-0.0603788	-0.0807687	0.097704	-0.00332284	0.0171052	0.00805038	6.89026e-07	0.730895	0.55487	0.99148	0.437624	0.300297	0.251612	0.968479	1.41003e-08	0.16268	0.929856	0.893289
496	phenylalanylserine	1595	TRUE	-0.55461	0.0256566	0.0512198	0.103928	0.00786443	0.0881002	-0.259239	-0.0821452	0.00685467	0.00809999	0.0103308	0.73143	0.407149	0.469698	0.919398	0.258131	0.00233015	0.328191	0.0229026	0.159735	0.929856	0.803194
124	1-stearoyl-2-docosahexaenoyl-GPC (18:0/22:6)	1595	TRUE	-2.25398	-0.0243507	0.0439553	0.0730398	0.0839008	-0.0389018	-0.0796426	-0.0861723	0.0389446	0.0105423	5.02756e-28	0.731578	0.453811	0.59262	0.25562	0.599023	0.324654	0.280103	3.44349e-42	0.0539884	0.929856	0.824699
430	myristoleoylcarnitine (C14:1)*	1595	TRUE	-1.81144	0.0247266	-0.0959158	-0.279409	-0.209856	-0.232106	-0.0363185	0.0516045	0.0305098	0.0142488	5.31293e-18	0.732763	0.109081	0.0448136	0.00531415	0.0021027	0.659726	0.526044	1.42244e-25	0.0106791	0.929856	0.529219
28	10-heptadecenoate (17:1n7)	1595	TRUE	-2.16598	-0.0243588	-0.0621846	-0.314503	-0.283388	-0.30334	-0.0833047	-0.0281724	0.0348747	0.0216373	1.12659e-25	0.733251	0.292562	0.0221283	0.000136959	4.65916e-05	0.306207	0.725806	9.86102e-34	8.56763e-05	0.929856	0.7164
724	X - 22776	1595	TRUE	-0.744149	0.0251553	0.0838254	0.187231	-0.0558657	-0.0372302	-0.0179324	0.290685	0.00341345	0.020293	0.000610956	0.737535	0.176708	0.19461	0.474088	0.634154	0.83388	0.000569776	0.25923	0.000451925	0.932032	0.610511
738	X - 23974	1595	TRUE	-0.318805	-0.0253183	0.0791514	0.0637157	-0.0786906	-0.0183315	0.00897258	0.0729164	0.00861979	-0.00459884	0.144702	0.737552	0.205035	0.661006	0.316462	0.815921	0.916966	0.390513	0.00464786	0.429668	0.932032	0.644858
315	docosahexaenoate (DHA; 22:6n3)	1595	TRUE	-1.66302	-0.0237137	0.0969652	-0.0209323	-0.116691	-0.100635	-0.0749437	0.0204681	0.0394259	-0.0125343	7.52828e-16	0.739461	0.0999487	0.878671	0.115475	0.175686	0.356162	0.798409	7.9295e-43	0.0225586	0.932032	0.511277
617	X - 11540	1595	TRUE	-2.14462	0.0240349	-0.0858118	-0.244979	-0.152699	-0.175768	-0.0569844	0.0270191	0.030276	0.0268193	1.33443e-24	0.739925	0.151639	0.0785024	0.0425097	0.0198468	0.489607	0.739865	3.24541e-25	1.53906e-06	0.932032	0.597464
170	2-palmitoleoyl-GPC (16:1)*	1595	TRUE	-1.18638	0.0240802	0.166121	-0.161126	0.151353	0.0422729	0.0183863	0.177235	0.0123738	0.0170494	3.67822e-08	0.746473	0.00697345	0.260632	0.0506442	0.586064	0.828435	0.0342435	3.76262e-05	0.00297799	0.938081	0.230257
115	1-palmitoyl-GPI (16:0)	1595	TRUE	-1.17472	-0.0240421	0.116405	-0.189512	-0.042511	-0.00302621	-0.0556963	-0.0320465	0.0133445	0.0193312	5.79843e-08	0.748054	0.0599183	0.187966	0.584872	0.969056	0.513589	0.703241	9.72275e-06	0.00080501	0.938081	0.45279
423	methyl glucopyranoside (alpha + beta)	1595	TRUE	-0.595068	-0.0238808	0.0423869	-0.211913	0.0316307	0.0331278	0.015544	0.0238056	0.0202648	-0.0182805	0.0057922	0.748696	0.491523	0.139331	0.683176	0.669814	0.854749	0.776298	1.5341e-11	0.00146302	0.938081	0.838717
219	4-imidazoleacetate	1595	TRUE	-0.489508	-0.0238715	0.0539415	0.0259249	0.028945	-0.138474	-0.0574482	-0.14664	0.00866173	0.00330479	0.0241912	0.750476	0.384668	0.857471	0.710723	0.0767294	0.501666	0.082183	0.00419882	0.567837	0.938081	0.784866
454	N-acetylphenylalanine	1595	TRUE	-1.85327	-0.0228879	-0.0357833	0.137321	-0.0962294	-0.133547	-0.157609	-0.00937806	0.0133997	0.0484315	1.12303e-18	0.752606	0.551066	0.325406	0.202426	0.0776221	0.0567118	0.908513	4.68661e-06	4.96425e-18	0.938081	0.893108
515	propionylglycine	1595	TRUE	0.22737	0.0236036	0.000452773	-0.112942	0.0985016	-0.054013	0.0250809	0.0344489	0.00713944	-0.0239754	0.294586	0.752929	0.994172	0.433484	0.20641	0.489478	0.769031	0.682709	0.018166	3.34445e-05	0.938081	0.996823
532	serylalanine	1595	TRUE	-0.197793	-0.0235495	-0.0598419	0.394266	0.0649954	0.132973	-0.227082	-0.0353505	-0.00289023	0.0135536	0.361852	0.753459	0.33428	0.00624923	0.404409	0.0888263	0.00784112	0.674851	0.338889	0.0190037	0.938081	0.745931
537	sphingomyelin (d18:1/18:1, d18:2/18:0)	1595	TRUE	-3.17663	-0.0212953	0.0463168	0.0464067	0.00132342	-0.0565027	-0.024945	-0.0270721	0.0334942	0.0582083	7.79184e-57	0.757994	0.417531	0.72697	0.985306	0.432806	0.751353	0.72745	2.67817e-33	8.50251e-28	0.939608	0.809236
196	3-methyl-2-oxobutyrate	1595	TRUE	0.0860063	0.0230783	-0.0722092	0.0058596	0.0448032	0.0850508	-0.02411	-0.164321	-0.000415255	-0.00193782	0.692364	0.758736	0.245	0.967653	0.566295	0.277456	0.778178	0.0516779	0.890942	0.737908	0.939608	0.681864
261	asparagine	1595	TRUE	0.47045	0.022768	-0.12788	-0.182378	-0.21323	-0.199959	-0.0822442	-0.321927	0.00889386	-0.0284854	0.0288311	0.759577	0.0375753	0.202389	0.00583768	0.00991277	0.331792	0.000118038	0.00301738	6.76428e-07	0.939608	0.416536
239	6-oxopiperidine-2-carboxylate	1595	TRUE	-1.80952	0.0223021	-0.0128369	-0.097206	0.0948439	0.00514047	-0.106865	0.071451	0.0279686	0.0136907	1.10732e-17	0.760141	0.831651	0.488963	0.211743	0.94617	0.199046	0.384148	2.12072e-21	0.0150271	0.939608	0.961691
58	1-linoleoyl-2-arachidonoyl-GPC (18:2/20:4)*	1595	TRUE	0.303173	0.0229238	0.00272455	-0.108996	-0.0731873	-0.184233	-0.111997	-0.231885	-4.81069e-05	-0.00733326	0.164261	0.760932	0.965106	0.451885	0.350143	0.0189677	0.191898	0.0061734	0.987361	0.206632	0.939608	0.990032
445	N-acetylcitrulline	1595	TRUE	-1.62318	-0.0217063	-0.0619602	0.173957	0.0171586	-0.0947455	-0.110448	0.00678902	0.018123	0.0285014	1.11802e-14	0.765044	0.302051	0.212949	0.820242	0.210695	0.181866	0.933716	5.98681e-10	3.54809e-07	0.941861	0.717539
11	1-(1-enyl-palmitoyl)-GPC (P-16:0)*	1595	TRUE	0.0645603	0.0222871	0.13965	-0.159694	0.110923	0.0121186	0.0612341	0.112417	0.0105922	-0.027725	0.764969	0.765262	0.0236167	0.265919	0.152915	0.876211	0.471411	0.180241	0.000430564	1.44044e-06	0.941861	0.371908
546	sphingosine	1595	TRUE	-1.36299	-0.0218393	-0.0509405	-0.245291	-0.0416976	-0.0977845	0.233054	0.016246	0.0123379	0.0287892	1.7825e-10	0.767458	0.404056	0.084158	0.587106	0.203961	0.00560157	0.844829	3.4044e-05	4.24303e-07	0.943021	0.800445
682	X - 17010	1595	TRUE	-0.827782	0.0219306	0.0721401	0.0775454	-0.0742888	-0.0675083	-0.0089158	0.317935	0.00647429	0.0177134	0.000127615	0.76904	0.242609	0.589261	0.338716	0.385802	0.916535	0.000152115	0.0315034	0.00208915	0.943046	0.678222
49	1-docosahexaenoyl-GPC (22:6)*	1595	TRUE	-1.2453	-0.0209583	0.133902	0.00267008	0.0435976	0.0585288	-0.044159	-0.0354362	0.0364649	-0.025766	2.13113e-09	0.770647	0.0242429	0.984591	0.559692	0.434715	0.589713	0.660968	2.57767e-36	3.3141e-06	0.943046	0.371908
177	2-stearoyl-GPI (18:0)*	1595	TRUE	-0.751736	-0.0217253	0.118147	-0.0250455	-0.0122262	0.00117134	-0.00838256	0.100819	0.00807741	0.0115042	0.000506096	0.771241	0.0557689	0.86163	0.874945	0.987999	0.921545	0.229932	0.00731879	0.0457526	0.943046	0.446856
674	X - 16132	1595	TRUE	-1.53225	-0.0213678	-0.0289457	0.0123492	-0.0422003	-0.106791	0.0666984	0.0223657	0.0136218	0.0335348	7.80688e-13	0.772544	0.635722	0.930776	0.582956	0.165728	0.42831	0.787779	4.83934e-06	3.95745e-09	0.943106	0.907897
167	2-oleoylglycerol (18:1)	1595	TRUE	-2.02938	0.0204028	0.18076	0.063928	0.0515656	0.152807	0.214975	0.218615	0.0187213	0.0348356	3.4999e-22	0.778182	0.00253517	0.646257	0.493491	0.0429458	0.00917008	0.00724082	1.42924e-10	4.36353e-10	0.944832	0.194881
651	X - 12824	1595	TRUE	-1.55404	-0.0201069	-0.135568	-0.148123	-0.197702	-0.170109	-0.123525	0.0510489	0.0284428	0.00885518	1.68907e-13	0.782609	0.0244126	0.290516	0.00906854	0.0251058	0.136718	0.533087	3.54007e-22	0.114867	0.944832	0.371908
185	3-hydroxybutyrate (BHBA)	1595	TRUE	-1.23558	0.0200866	-0.120967	-0.325382	-0.194945	-0.204629	-0.212259	0.0113588	0.0270022	0.000122896	5.23329e-09	0.78359	0.0454014	0.020695	0.0103541	0.00726287	0.0108384	0.890092	5.19524e-20	0.982605	0.944832	0.421504
380	histidyltryptophan	1595	TRUE	-1.27171	-0.020435	-0.044143	0.0874731	-0.000386064	0.150782	-0.0797823	0.15013	0.00851994	0.0312786	4.55624e-09	0.785205	0.476325	0.544077	0.996049	0.0536679	0.350232	0.0748218	0.00481472	6.20697e-08	0.944832	0.827243
193	3-methoxycatechol sulfate (1)	1595	TRUE	-0.736074	0.020327	-0.0489743	-0.0848344	-0.0920667	-0.0683591	-0.198913	-0.131741	0.0149802	0.00270846	0.000697288	0.786478	0.429791	0.556604	0.237959	0.382077	0.0199575	0.118263	7.31119e-07	0.639552	0.944832	0.818234
276	caprate (10:0)	1595	TRUE	-0.775931	0.0195942	-0.0167481	-0.358816	-0.398549	-0.489819	-0.309956	-0.400669	0.0250552	-0.0061932	0.000240687	0.788499	0.78148	0.0106328	1.53553e-07	1.24015e-10	0.000194978	1.05663e-06	1.73203e-17	0.271262	0.944832	0.961691
414	malate	1595	TRUE	-0.695176	-0.0194742	-0.0594843	0.278626	-0.338318	-0.0771411	-0.21879	0.00379612	0.0106209	0.0114567	0.000984964	0.789453	0.323789	0.0469621	8.12577e-06	0.310168	0.00844699	0.963061	0.000302609	0.0415246	0.944832	0.735617
63	1-linoleoyl-GPI (18:2)*	1595	TRUE	-0.492923	-0.0198158	0.16214	-0.180764	-0.0637585	0.059947	-0.1515	-0.0659396	0.00815121	0.00321467	0.02297	0.791423	0.00884914	0.209655	0.413099	0.4427	0.0758886	0.433616	0.00695504	0.577751	0.944832	0.248124
271	bilirubin (E,E)*	1595	TRUE	0.0103499	-0.0195519	-0.0625	-0.279521	0.102454	0.0760782	0.224684	0.0363233	0.00531218	-0.0134924	0.961462	0.791727	0.307165	0.0496282	0.183208	0.324188	0.00771975	0.662471	0.0750702	0.018057	0.944832	0.717539
45	1-dihomo-linolenoyl-GPE (20:3n3 or 6)*	1595	TRUE	-1.22681	0.0196665	0.0611017	-0.0205687	0.00112852	-0.025217	0.0338161	0.00300959	0.0115237	0.0240901	1.50427e-08	0.792901	0.323743	0.886457	0.988438	0.746692	0.691868	0.971483	0.000135212	3.0089e-05	0.944832	0.735617
652	X - 12844	1595	TRUE	-1.76503	0.0190422	-0.0769065	0.0569924	0.00984207	0.0271733	0.0532984	-0.0462458	0.021415	0.025723	7.91467e-17	0.794808	0.20384	0.685648	0.897128	0.721774	0.522786	0.574127	3.97474e-13	5.15474e-06	0.944832	0.644858
491	phenylacetate	1595	TRUE	0.214155	0.0193868	0.0434119	-0.051191	0.137628	-0.0209791	0.160879	0.0750156	0.00357457	-0.0186379	0.322396	0.795512	0.482649	0.721953	0.0767976	0.787866	0.0590231	0.372259	0.235809	0.00122614	0.944832	0.830554
106	1-palmitoyl-2-oleoyl-GPC (16:0/18:1)	1595	TRUE	-1.72349	0.0188502	-0.00456938	-0.170857	-0.0111869	-0.0701776	-0.0489753	-0.0984739	0.0235428	0.0219316	6.07343e-16	0.798017	0.940178	0.227737	0.883858	0.360642	0.559412	0.234235	2.19507e-15	0.000111866	0.944832	0.982882
48	1-docosahexaenoylglycerol (22:6)	1595	TRUE	-2.17554	-0.0182908	0.155713	0.0494275	-0.0171905	0.159354	-0.0255012	0.0973562	0.0352938	0.011238	1.02091e-25	0.798716	0.00863146	0.720084	0.817685	0.0330325	0.754944	0.227161	2.81305e-34	0.0420593	0.944832	0.248124
19	1-(1-enyl-stearoyl)-GPC (P-18:0)*	1595	TRUE	0.060901	0.0191135	0.117292	-0.0523318	-0.00904165	-0.0951309	-0.0540736	0.0166608	0.00638939	-0.0153492	0.779549	0.799383	0.0591979	0.71747	0.907941	0.224873	0.527903	0.84374	0.0350489	0.00809376	0.944832	0.45279
160	2-isopropylmalate	1595	TRUE	-1.00275	0.0187876	-0.0445821	-0.0608473	-0.0470449	-0.286141	-0.237015	-0.166455	0.0141595	0.0165938	3.00451e-06	0.800143	0.46738	0.669843	0.542036	0.000216009	0.00505022	0.0459656	2.20458e-06	0.00371694	0.944832	0.824699
174	2-piperidinone	1595	TRUE	-0.371531	-0.0187443	-0.0959267	-0.00275365	-0.0454661	0.0175945	-0.150734	-0.124786	0.00525964	0.00683484	0.0865657	0.802478	0.121464	0.984754	0.559495	0.821757	0.0774058	0.138423	0.0816112	0.236622	0.944832	0.556958
225	5alpha-androstan-3alpha,17beta-diol monosulfate (1)	1595	TRUE	-0.223699	0.0182957	-0.00274862	0.134696	0.0475816	0.0942184	0.0981812	0.0874462	-0.0177588	0.0410065	0.290444	0.802482	0.96374	0.338256	0.53151	0.216478	0.238628	0.28744	1.70424e-09	3.48274e-13	0.944832	0.990032
658	X - 13835	1595	TRUE	-1.27602	0.0183218	-0.0596615	0.220158	0.185373	0.0927	0.011531	0.218691	0.00733033	0.0307802	2.33642e-09	0.80406	0.328402	0.121083	0.0157629	0.228434	0.890969	0.00841724	0.0137913	6.37362e-08	0.944832	0.739396
582	undecanedioate	1595	TRUE	-0.375153	0.0188552	0.000900514	-0.0541054	-0.269102	-0.209464	-0.171125	-0.091453	0.00988229	0.0008715	0.0884094	0.804331	0.988579	0.711619	0.000671608	0.0082729	0.0483877	0.284992	0.00127513	0.881887	0.944832	0.995981
112	1-palmitoylglycerol (16:0)	1595	TRUE	-2.35264	0.0178924	0.195065	0.123699	-0.113709	0.0172507	0.142393	0.149908	0.0259242	0.0368543	2.49159e-29	0.804612	0.00110357	0.373806	0.130491	0.818987	0.0839224	0.0651595	5.9647e-19	3.80404e-11	0.944832	0.194881
119	1-pentadecanoyl-GPC (15:0)*	1595	TRUE	-1.08168	0.0178127	0.165406	-0.254725	0.117615	-0.0946098	0.0806581	-0.0446639	0.0266043	-0.0124507	2.59554e-07	0.806159	0.00584134	0.0680399	0.119136	0.211108	0.329329	0.584067	9.65282e-20	0.0260496	0.944832	0.230257
686	X - 17167	1595	TRUE	0.660054	0.0181671	0.041969	0.308387	0.0570485	0.0684568	-0.312687	-0.049181	-0.0106012	-0.00407911	0.00219877	0.807374	0.495617	0.0313811	0.461477	0.378037	0.000229496	0.557013	0.000415748	0.477506	0.944832	0.838717
102	1-palmitoyl-2-linoleoyl-GPC (16:0/18:2)	1595	TRUE	-0.955439	-0.0181468	0.0336811	-0.315115	-0.0454419	-0.107643	-0.103231	-0.143793	0.016928	0.00686279	9.46171e-06	0.807719	0.584755	0.0279774	0.557757	0.16601	0.224209	0.0861884	1.77625e-08	0.232396	0.944832	0.902091
601	X - 11315	1595	TRUE	-0.694972	0.017613	0.0116246	-0.0919966	-0.0560206	-0.0394793	-0.0901306	-0.111306	0.0245588	-0.0197871	0.00100437	0.809424	0.847305	0.512437	0.460634	0.603986	0.278609	0.175077	7.24152e-17	0.000438985	0.944832	0.962573
55	1-eicosenoyl-GPC (20:1)*	1595	TRUE	0.0442573	-0.0175799	0.104511	0.217025	0.0548961	0.128907	-0.0179333	-0.0536257	0.0195877	-0.0435683	0.834802	0.810598	0.0847831	0.123931	0.471644	0.0917736	0.830061	0.515398	3.47396e-11	1.2939e-14	0.944832	0.490437
405	laurylcarnitine (C12)	1595	TRUE	-1.78547	0.0171438	-0.0813774	-0.245745	-0.239712	-0.289629	-0.0522066	-0.0377142	0.0331449	0.00903008	1.30834e-17	0.812416	0.172967	0.0769096	0.00141512	0.000119714	0.525803	0.642288	5.08798e-30	0.104835	0.944832	0.609557
361	glycochenodeoxycholate	1595	TRUE	0.4484	0.0177901	0.0537355	0.186371	-0.0936876	-0.0922999	-0.129744	-0.168602	-0.00507686	-0.00441878	0.0406547	0.81424	0.390582	0.200551	0.233991	0.242145	0.132492	0.0475582	0.0962024	0.448913	0.944832	0.791692
688	X - 17179	1595	TRUE	-0.626746	0.0175684	0.0141143	0.181278	0.0643177	0.0490264	-0.215132	0.0606923	0.00152851	0.0210328	0.00383238	0.814599	0.819716	0.208306	0.408956	0.530085	0.0117049	0.471034	0.612733	0.000269867	0.944832	0.961691
526	ribitol	1595	TRUE	-1.72202	0.0170573	-0.0341265	0.15973	-0.0412358	-0.127749	-0.0442242	0.0504862	0.0112998	0.0456775	3.98357e-16	0.815576	0.572401	0.256056	0.587589	0.09373	0.595502	0.539058	0.000126363	5.31459e-16	0.944832	0.900902
171	2-palmitoylglycerol (16:0)	1595	TRUE	-1.54275	-0.0171267	0.178366	0.261967	-0.15016	0.0147604	0.0134091	0.157224	0.0158542	0.0267603	4.51753e-13	0.816152	0.0033982	0.0644186	0.049921	0.847542	0.873036	0.0575596	9.31183e-08	2.43484e-06	0.944832	0.194881
376	hexanoylcarnitine (C6)	1595	TRUE	-2.48858	0.0164603	-0.0735863	-0.224859	-0.205238	-0.236414	-0.0928134	-0.029862	0.037818	0.0266233	8.03796e-34	0.816563	0.209645	0.0993878	0.00540302	0.00139007	0.250853	0.708076	6.50072e-40	1.12644e-06	0.944832	0.649096
67	1-margaroyl-GPC (17:0)	1595	TRUE	-0.573663	-0.0166366	0.185074	0.0166174	0.144606	0.0331864	0.136375	-0.0135036	0.0276915	-0.0372154	0.00594183	0.817465	0.00189522	0.904576	0.053654	0.658666	0.0967162	0.867615	1.55162e-21	2.09694e-11	0.944832	0.194881
149	2-docosahexaenoyl-GPC (22:6)*	1595	TRUE	-0.871053	-0.0166766	0.129441	0.0289739	-0.00893292	0.0290747	-0.0487412	0.0209625	0.0265005	-0.0203154	4.28814e-05	0.820724	0.0333462	0.837777	0.907054	0.704627	0.560929	0.799918	4.09867e-19	0.000341092	0.944832	0.404457
172	2-palmitoyl-GPC (16:0)*	1595	TRUE	-1.12161	-0.0167636	0.14271	-0.211394	0.0787176	0.170848	0.114517	0.306913	0.0135205	0.0103139	1.74684e-07	0.821279	0.0199917	0.138515	0.307589	0.0271733	0.175489	0.000233288	6.17396e-06	0.0713286	0.944832	0.371908
464	nicotinamide	1595	TRUE	0.0345241	-0.0168917	-0.101846	0.224337	-0.0123181	-0.0797881	0.012451	-0.0331889	-0.00276927	0.00596011	0.873901	0.822255	0.101304	0.120796	0.874796	0.30862	0.884419	0.694522	0.360862	0.303732	0.944832	0.511277
394	isobutyrylcarnitine (C4)	1595	TRUE	-0.976092	-0.0167135	0.0625766	0.035398	0.0186571	-0.091193	-0.0362496	-0.125105	0.0181376	0.00275904	6.32021e-06	0.823007	0.310996	0.805413	0.810205	0.241598	0.67018	0.136298	1.71916e-09	0.631867	0.944832	0.717539
584	urate	1595	TRUE	-2.89821	0.0152924	0.0333221	0.202621	-0.0413752	0.0194579	-0.00166371	0.0371832	0.019	0.0734908	4.47138e-48	0.824013	0.557728	0.125462	0.562773	0.786008	0.983054	0.630432	7.12786e-12	1.00697e-43	0.944832	0.893289
314	docosadienoate (22:2n6)	1595	TRUE	-1.2583	-0.0163193	-0.0513944	-0.134484	-0.191229	-0.153969	-0.104059	-0.0290154	0.0286076	-0.00414266	3.29725e-09	0.824334	0.397721	0.341488	0.0123551	0.0444908	0.214018	0.725468	4.72406e-22	0.464702	0.944832	0.796761
60	1-linoleoyl-GPA (18:2)*	1595	TRUE	-0.711788	-0.0164695	-0.0243429	-0.250257	0.00990122	-0.00883248	0.196901	0.101365	0.0142037	-0.00199607	0.00106826	0.826634	0.695333	0.0835197	0.89922	0.910268	0.0215169	0.23037	2.78139e-06	0.730529	0.944832	0.921689
299	cysteine	1595	TRUE	-0.851976	0.0163594	-0.0410782	0.00896373	-0.0108276	0.0334161	0.17718	-0.0269065	0.00960242	0.0129122	8.17962e-05	0.82679	0.506239	0.950286	0.889212	0.668026	0.0374733	0.7488	0.00143953	0.0250289	0.944832	0.840072
364	glycodeoxycholate	1595	TRUE	0.403648	-0.0165195	0.00605454	0.0405808	-0.120204	-0.129849	-0.127903	-0.201027	-0.00148079	-0.00779838	0.0652944	0.827244	0.922914	0.780412	0.126662	0.0997798	0.137966	0.0181284	0.62743	0.181306	0.944832	0.980551
277	caproate (6:0)	1595	TRUE	-0.519668	0.0162836	0.100863	0.0368638	-0.229522	-0.194514	-0.124362	0.0110338	0.00401966	0.015852	0.0165332	0.827984	0.10348	0.798108	0.00322073	0.0127595	0.145155	0.895772	0.183269	0.00605855	0.944832	0.515343
751	X - 24435	1595	TRUE	0.318121	0.0155791	0.0808139	-0.116754	0.0422236	-0.0914073	-0.0275077	-0.0970915	0.0025278	-0.0184007	0.134324	0.832006	0.183122	0.40841	0.580269	0.232397	0.742289	0.239478	0.393135	0.00115029	0.945289	0.61987
700	X - 21258	1595	TRUE	0.150736	0.0159263	0.02766	0.140479	-0.00716786	-0.0678867	0.101265	-0.158735	0.00769523	-0.0207477	0.488375	0.832266	0.656324	0.331316	0.926949	0.386372	0.237107	0.0603492	0.0111189	0.000343576	0.945289	0.907897
703	X - 21339	1595	TRUE	0.34902	0.0158681	-0.0266158	0.174077	-0.0445766	-0.0494455	-0.0216535	-0.0611747	-0.0144275	0.0169427	0.107527	0.832351	0.667527	0.2272	0.567337	0.526798	0.799807	0.467758	1.79558e-06	0.0033606	0.945289	0.912692
470	octanoylcarnitine (C8)	1595	TRUE	-1.87465	0.0151562	-0.089039	-0.270044	-0.187224	-0.288314	-0.0824389	-0.0549799	0.0339439	0.0109556	3.59511e-19	0.834207	0.136867	0.0524656	0.0128856	0.000133275	0.31756	0.499309	2.89539e-31	0.049634	0.945289	0.563485
36	(16 or 17)-methylstearate (a19:0 or i19:0)	1595	TRUE	-1.46906	0.0151198	-0.00578428	-0.222469	-0.20843	-0.172949	-0.066207	0.0933084	0.031505	-0.00272168	2.54482e-12	0.834875	0.923144	0.110727	0.00571123	0.0221487	0.422939	0.252371	4.4557e-27	0.626352	0.945289	0.980551
146	2-arachidonoyl-GPC (20:4)*	1595	TRUE	-0.275771	0.0156639	0.0464353	-0.0222831	-0.11295	-0.0692248	-0.10322	-0.0894191	0.00558759	0.00170851	0.207546	0.835927	0.457636	0.878234	0.150882	0.379834	0.230864	0.292819	0.0668132	0.769442	0.945289	0.824699
581	tyrosine	1595	TRUE	-2.51459	0.0144471	-0.0787702	-0.0450967	-0.185961	-0.372655	-0.144259	-0.192036	0.0298548	0.0461335	1.00542e-34	0.838117	0.177795	0.740171	0.0114255	4.27317e-07	0.0733007	0.0156794	1.13076e-25	2.56387e-17	0.946342	0.610511
500	phosphate	1595	TRUE	0.249035	0.0149468	-0.0655316	0.374946	-0.01214	-0.325256	-0.0330528	0.0214014	-0.00462653	0.00288988	0.252268	0.842428	0.291714	0.0095105	0.876587	3.3164e-05	0.699555	0.80007	0.126859	0.617994	0.949613	0.7164
630	X - 12101	1595	TRUE	-0.317567	0.0147939	-0.0336532	0.062421	-0.0636162	0.0678475	-0.0404913	-0.0225967	0.00824281	-0.00358599	0.144416	0.844057	0.588284	0.666035	0.41588	0.386721	0.63646	0.789212	0.00654453	0.536137	0.949613	0.902091
190	3-hydroxyoctanoate	1595	TRUE	-1.5974	-0.0143744	0.018087	-0.192833	-0.29364	-0.185502	-0.194155	-0.0242068	0.0251022	0.0178542	6.02396e-14	0.845044	0.766077	0.17275	0.000122928	0.0155183	0.0204726	0.769635	2.49859e-17	0.00163358	0.949613	0.959748
588	valylarginine	1595	TRUE	0.807251	-0.0143971	-0.000715814	0.233896	0.0407816	-0.00146914	-0.201613	-0.123445	-0.00870344	-0.0122491	0.000168086	0.846065	0.990683	0.100977	0.596842	0.984834	0.0169973	0.138571	0.00359339	0.0320975	0.949613	0.995981
148	2'-deoxyuridine	1595	TRUE	0.747057	0.0139036	0.0133249	-0.0701626	0.00216689	-0.0218407	0.038056	0.101123	-0.00801553	-0.0144519	0.000588248	0.853185	0.830115	0.627239	0.977869	0.780305	0.656552	0.231085	0.0081236	0.0125667	0.956119	0.961691
377	hexanoylglycine	1595	TRUE	-0.655177	-0.0137216	-0.0329479	-0.159647	-0.039613	-0.0499553	-0.012279	0.22539	0.0160557	-0.00631497	0.00245704	0.854405	0.594006	0.266908	0.610376	0.521526	0.885374	0.00732047	9.98002e-08	0.273182	0.956119	0.902091
258	arachidate (20:0)	1595	TRUE	0.131672	0.0131654	-0.0358084	-0.142423	-0.256478	-0.28525	-0.174809	-0.0690213	0.0152025	-0.0291306	0.539777	0.859224	0.559494	0.318404	0.000889287	0.00022677	0.0386904	0.408043	3.7497e-07	3.54301e-07	0.959567	0.893289
701	X - 21286	1595	TRUE	-0.392673	0.0128008	-0.0357281	0.00575934	-0.0622046	-0.0657973	0.046111	-0.063046	0.00701434	0.00338731	0.0686286	0.863653	0.562025	0.967952	0.42218	0.397038	0.587087	0.451727	0.0195645	0.555453	0.959567	0.893899
742	X - 24097	1595	TRUE	-1.61078	0.0124514	-0.00739817	-0.180349	-0.0392401	-0.134653	-0.129063	-0.217677	0.0223344	0.0226988	2.57122e-14	0.86472	0.902535	0.199418	0.605559	0.0770991	0.121064	0.00804729	3.40757e-14	5.58174e-05	0.959567	0.975004
550	stearidonate (18:4n3)	1595	TRUE	-1.95967	-0.012063	-0.0774283	-0.208269	-0.302981	-0.311659	-0.130351	-0.128092	0.0337053	0.0171319	3.68181e-21	0.866477	0.1917	0.131167	4.8692e-05	3.07373e-05	0.11071	0.112166	2.15346e-31	0.00194656	0.959567	0.633884
553	suberate (C8-DC)	1595	TRUE	-0.916393	-0.0125119	0.119216	0.00241167	-0.151469	-0.0926176	-0.20274	0.0553847	0.00806584	0.0220529	2.24644e-05	0.867028	0.0536095	0.98661	0.0512219	0.234361	0.0172273	0.509602	0.0074079	0.000128596	0.959567	0.443014
113	1-palmitoyl-GPC (16:0)	1595	TRUE	-1.39996	-0.0123796	0.148808	-0.115465	0.0317815	-0.0601682	0.0898638	0.000889679	0.0244557	0.00397796	6.3777e-11	0.867235	0.0150577	0.417474	0.679756	0.435635	0.28672	0.991471	2.53917e-16	0.485805	0.959567	0.343132
665	X - 15245	1595	TRUE	-0.185475	0.012296	-0.0153849	0.12419	-0.104515	-0.118503	-0.0124583	-0.320965	0.000514492	0.0107788	0.387357	0.868323	0.801854	0.383895	0.175284	0.12526	0.882763	0.000117849	0.863354	0.0593344	0.959567	0.961691
41	1-arachidonoyl-GPI (20:4)*	1595	TRUE	-1.20561	0.0123107	0.131263	0.182815	-0.0848291	-0.00166601	-0.100052	-0.0774747	0.0152637	0.0167927	2.23634e-08	0.868776	0.0330803	0.20202	0.273518	0.982885	0.238481	0.354903	3.73058e-07	0.00345423	0.959567	0.404457
74	1-myristoyl-2-linoleoyl-GPC (14:0/18:2)*	1595	TRUE	-1.66389	0.0119719	0.0717497	-0.285676	-0.039208	-0.0911278	-0.078034	-0.134672	0.0221584	0.0235046	2.59269e-15	0.869233	0.23262	0.0410656	0.604039	0.229214	0.346154	0.0993913	4.03124e-14	2.74191e-05	0.959567	0.668404
282	chenodeoxycholate	1595	TRUE	-1.08957	-0.0119805	-0.0121624	0.262598	0.0735643	-0.076451	-0.0905279	-0.045612	0.0139223	0.0149769	3.9804e-07	0.871876	0.842993	0.0660289	0.340843	0.32342	0.284684	0.584845	3.32273e-06	0.00889802	0.959567	0.962573
457	N-acetyltaurine	1595	TRUE	-1.61547	0.0118024	-0.0717433	-0.0726292	0.086713	-0.0200722	0.127239	0.256733	0.0194927	0.0209442	2.52718e-14	0.87204	0.236234	0.606259	0.255029	0.792683	0.127404	0.00182445	4.11453e-11	0.000208386	0.959567	0.668404
673	X - 16123	1595	TRUE	-0.512114	-0.0119794	-0.018067	0.203292	0.0816993	0.0414805	-0.257862	0.00661743	-0.000249686	0.0210188	0.0179897	0.872798	0.770199	0.157694	0.293604	0.594775	0.00248182	0.937277	0.934016	0.000267459	0.959567	0.960513
207	4-allylphenol sulfate	1595	TRUE	-1.03592	0.011468	0.0498379	-0.101498	0.0372153	0.0701646	0.0629575	0.0583435	0.0229227	-0.00789997	1.0435e-06	0.875721	0.410945	0.471653	0.625437	0.358561	0.450994	0.478975	8.77309e-15	0.162145	0.961375	0.804766
326	erythronate*	1595	TRUE	-1.50636	0.0111451	-0.00284088	-0.105217	0.0590735	-0.13228	-0.0716257	0.128129	0.0263055	0.00646798	1.55502e-12	0.879723	0.962783	0.457562	0.440439	0.0848441	0.393245	0.121653	7.92424e-19	0.254517	0.962884	0.990032
330	fumarate	1595	TRUE	-0.647974	0.0112241	-0.0447721	-0.0620875	0.0150412	-0.153999	0.0187001	0.0998537	0.01385	-0.00260619	0.00260021	0.880046	0.466467	0.66422	0.845772	0.0469594	0.825304	0.23226	3.83681e-06	0.649355	0.962884	0.824699
62	1-linoleoyl-GPE (18:2)*	1595	TRUE	0.0790843	0.0112968	0.118639	-0.00944933	-0.0859585	-0.178642	-0.12862	-0.244255	0.0039054	-0.00701369	0.71702	0.880937	0.0570455	0.948054	0.272983	0.0230488	0.134358	0.00395759	0.198901	0.227586	0.962884	0.446856
586	uridine	1595	TRUE	-0.817093	0.0109231	-0.0237432	-0.00176066	0.181395	0.0526555	0.1724	0.0521103	0.0105055	0.00694539	0.000160852	0.883964	0.70114	0.99024	0.0197437	0.49965	0.0431522	0.535584	0.000496745	0.228558	0.964165	0.921778
294	cortisone	1595	TRUE	0.320902	0.0107741	-0.014227	-0.139093	0.0748882	0.196006	0.119771	0.13435	0.00735215	-0.031766	0.135357	0.884673	0.816764	0.330179	0.332185	0.0113463	0.156903	0.107545	0.0140617	2.87518e-08	0.964165	0.961691
501	phosphatidylcholine (16:0/22:5n3, 18:1/20:4)*	1595	TRUE	-0.837933	0.0103684	0.0221842	0.0786679	0.0160575	-0.0150956	-0.0984099	-0.20486	0.0186797	-0.00288843	0.000100311	0.889254	0.718528	0.582734	0.835679	0.845768	0.245937	0.0143661	4.8452e-10	0.614736	0.967756	0.931608
292	citrulline	1595	TRUE	-1.92491	0.00943492	-0.0518513	-0.144978	-0.194244	-0.165532	-0.0438992	-0.104538	0.0426387	-0.00581922	4.5003e-21	0.893734	0.374485	0.285799	0.00816467	0.0245333	0.58531	0.187869	1.03151e-50	0.285064	0.968086	0.775793
563	taurodeoxycholate	1595	TRUE	0.292801	0.00991893	0.0679362	0.00910056	-0.0569798	0.00723264	-0.0355385	-0.0238578	0.000622153	-0.0117803	0.178512	0.895103	0.274621	0.949841	0.466297	0.926502	0.678343	0.777809	0.83743	0.0421733	0.968086	0.709673
477	orotidine	1595	TRUE	-2.58206	0.00912689	-0.03023	0.0502627	-0.109282	-0.199582	-0.0923362	-0.00302804	0.0274329	0.0488423	2.56267e-36	0.897601	0.60609	0.712469	0.138309	0.00693051	0.253035	0.969696	8.24261e-22	4.03903e-19	0.968086	0.904612
7	1-(1-enyl-palmitoyl)-2-linoleoyl-GPE (P-16:0/18:2)*	1595	TRUE	-0.305944	-0.00955955	0.0430709	-0.229032	-0.0626984	-0.0255619	-0.0550647	-0.265502	0.00840659	-0.00238967	0.158486	0.898565	0.487172	0.112249	0.4213	0.743627	0.51917	0.00163197	0.00541567	0.679267	0.968086	0.834518
611	X - 11478	1595	TRUE	0.129804	0.00949601	-0.124709	0.148954	-0.106696	-0.0579451	-0.065604	0.0463208	-0.0137889	0.0253546	0.54788	0.898794	0.0433149	0.299534	0.169282	0.456484	0.440476	0.580941	4.60568e-06	1.052e-05	0.968086	0.421504
218	4-hydroxyphenylpyruvate	1595	TRUE	-0.805172	0.00942338	-0.0711731	0.00798984	-0.061085	-0.0811947	-0.0739771	-0.15346	0.0109817	0.0129547	0.000205922	0.899992	0.250857	0.955813	0.433302	0.298825	0.386428	0.0686139	0.000279586	0.0249829	0.968086	0.681864
646	X - 12688	1595	TRUE	-0.437406	-0.00940697	-0.0225789	-0.0216549	0.0161276	0.058925	0.105542	0.0495509	0.00714578	0.00128619	0.0439379	0.900246	0.715873	0.880723	0.836241	0.451222	0.216955	0.556874	0.0181573	0.824019	0.968086	0.930287
554	succinate	1595	TRUE	-0.644208	0.00946886	0.0323536	-0.237707	-0.105409	-0.329363	-0.0311219	0.042405	0.0105628	0.00742679	0.00336626	0.900774	0.606283	0.103594	0.181865	3.16466e-05	0.719019	0.619311	0.000558934	0.204478	0.968086	0.904612
467	N-palmitoylglycine	1595	TRUE	-0.911434	0.00911932	-0.0144147	-0.559609	-0.0779785	-0.093874	0.0231993	0.0627703	0.020167	-0.003363	2.23757e-05	0.902325	0.814458	8.99497e-05	0.3128	0.225458	0.784016	0.45228	1.65675e-11	0.55705	0.968086	0.961691
264	azelate (nonanedioate)	1595	TRUE	-0.743313	-0.00917175	0.0880392	-0.100188	-0.285312	-0.275021	-0.122175	0.0291859	0.0104309	0.013413	0.000594349	0.902431	0.154571	0.486206	0.000244468	0.000420248	0.151679	0.728518	0.000542136	0.020009	0.968086	0.597464
494	phenylalanylleucine	1595	TRUE	-0.578023	0.00896229	0.00459081	-0.0251972	-0.140412	-0.135168	-0.0169767	-0.0517475	0.000553549	0.0244619	0.00781291	0.905021	0.941057	0.861515	0.0721672	0.084226	0.842712	0.539876	0.85492	2.38193e-05	0.969481	0.982882
374	heptanoate (7:0)	1595	TRUE	-0.394679	0.0088195	0.0310119	0.267401	-0.118723	0.0717377	-0.141691	0.0897082	0.00565632	0.00412158	0.0717821	0.907337	0.620502	0.0664801	0.131787	0.363655	0.100654	0.292141	0.064012	0.480316	0.97058	0.907897
531	serotonin	1595	TRUE	1.04604	0.00823014	0.158319	-0.0917757	0.0253826	0.115624	-0.0787526	-0.10408	-0.00418003	-0.0336372	7.90399e-07	0.910512	0.00890872	0.514574	0.73883	0.12977	0.345092	0.205994	0.156706	2.51905e-09	0.971146	0.248124
372	guanosine	1595	TRUE	0.447514	0.00832345	0.0442943	0.116864	0.15756	0.198247	-0.225446	0.0743056	-0.00688381	-0.00666405	0.0373703	0.910813	0.470834	0.413461	0.0414047	0.0104727	0.0077331	0.37361	0.0215407	0.244575	0.971146	0.824699
685	X - 17166	1595	TRUE	-0.922078	-0.00828517	-0.016562	0.297324	0.0416195	0.0838197	-0.290707	-0.0207254	0.0046297	0.0272431	2.00766e-05	0.911741	0.788661	0.0385961	0.592264	0.281951	0.000639311	0.805134	0.124369	2.25559e-06	0.971146	0.961691
80	1-oleoyl-2-docosahexaenoyl-GPC (18:1/22:6)*	1595	TRUE	-0.811981	0.00711351	0.094792	0.115641	0.111726	0.0703144	-0.0251157	-0.114993	0.0306928	-0.0310803	9.84119e-05	0.921372	0.111564	0.40405	0.135929	0.349202	0.759643	0.155689	4.27316e-26	2.19744e-08	0.977423	0.537794
369	glycylvaline	1595	TRUE	-1.29509	-0.00728532	-0.0281406	-0.234431	-0.034515	-0.037116	0.20578	0.138783	0.0146173	0.0201758	1.69258e-09	0.921893	0.646827	0.100862	0.655021	0.631731	0.0150421	0.0965294	1.05639e-06	0.000426298	0.977423	0.907897
120	1-stearoyl-2-arachidonoyl-GPC (18:0/20:4)	1595	TRUE	-1.45666	-0.00722757	-0.0453867	0.228838	-0.0136617	-0.0563724	-0.153162	-0.136924	0.0155569	0.0286752	9.20621e-12	0.922032	0.457154	0.107079	0.858766	0.463888	0.0686279	0.0989838	1.72556e-07	4.69294e-07	0.977423	0.824699
505	piperine	1595	TRUE	-0.0140931	0.00722489	-0.0753518	0.0674471	-0.202911	-0.141484	-0.0978956	-0.236353	-0.0011918	0.00908707	0.947926	0.922833	0.221644	0.638187	0.00887908	0.0687492	0.249215	0.00480947	0.691784	0.113925	0.977423	0.658298
257	arabonate/xylonate	1595	TRUE	-1.64257	0.00674152	0.0140468	-0.0510696	-0.113425	-0.22863	-0.0830169	-0.122163	0.0258215	0.0169287	6.85266e-15	0.926331	0.815708	0.715682	0.134574	0.00262363	0.31751	0.136012	1.54277e-18	0.00259009	0.979636	0.961691
355	glycerol	1595	TRUE	-2.46683	0.00653187	-0.0315721	-0.270947	-0.254638	-0.196441	-0.197713	-0.00188258	0.0261944	0.0504959	1.62418e-32	0.927527	0.594825	0.0497667	0.000648403	0.00867491	0.015649	0.981391	1.43473e-19	7.27253e-20	0.979636	0.902091
304	decanoylcarnitine (C10)	1595	TRUE	-1.74597	0.00625189	-0.0841349	-0.299865	-0.215288	-0.263491	-0.0532981	-0.0244227	0.0320247	0.00941316	1.02903e-16	0.931469	0.1615	0.0319612	0.00439488	0.000506016	0.519824	0.765011	8.37698e-28	0.0929526	0.981833	0.604092
663	X - 14838	1595	TRUE	-1.15394	-0.00614199	-0.0675062	0.181771	0.159702	0.0796271	-0.0905547	0.162289	0.0109243	0.0205006	8.69374e-08	0.934317	0.273163	0.204684	0.0392895	0.305286	0.286097	0.0526757	0.000276084	0.000358069	0.981833	0.708818
473	oleoylcarnitine (C18:1)	1595	TRUE	-2.05827	0.00591213	-0.0402296	-0.113848	-0.0547183	-0.169311	0.0861362	0.102824	0.0278264	0.0251535	6.43144e-23	0.934722	0.500161	0.412115	0.465922	0.0244123	0.294816	0.204989	1.12952e-21	6.14146e-06	0.981833	0.839365
322	epiandrosterone sulfate	1595	TRUE	1.30403	0.0059972	-0.0172196	0.0628058	0.0364122	-0.0413675	-0.0522496	-0.155034	-0.0254758	0.000887798	1.31741e-09	0.935682	0.779241	0.660323	0.637452	0.593281	0.537085	0.0634303	1.81718e-17	0.876819	0.981833	0.961691
717	X - 21810	1595	TRUE	-0.159272	0.00592255	0.0499917	0.0532854	0.0575306	-0.0476179	0.115747	0.0372901	0.000675565	0.00321449	0.456377	0.936136	0.413238	0.707752	0.454077	0.536492	0.169209	0.653514	0.820612	0.572565	0.981833	0.806336
420	methionine	1595	TRUE	-0.622355	0.00562267	-0.104111	-0.0900313	-0.111407	-0.100263	-0.021756	-0.21325	0.0129209	0.00268531	0.00381685	0.939727	0.0903151	0.528964	0.149583	0.195771	0.797295	0.0107225	1.62569e-05	0.639391	0.982983	0.49544
88	1-oleoyl-GPI (18:1)	1595	TRUE	-0.1769	0.00548589	0.0886813	-0.0580246	-0.082772	-0.00110489	-0.0462356	-0.0758214	0.00419353	-0.000848043	0.417117	0.941966	0.154544	0.688857	0.290746	0.988776	0.590134	0.370655	0.167386	0.883907	0.982983	0.597464
378	hippurate	1595	TRUE	-0.784952	0.00538243	-0.0238475	-0.207497	-0.172577	-0.0889265	-0.0995383	-0.120132	0.0238785	-0.012793	0.000252051	0.942117	0.697142	0.14551	0.0251414	0.249726	0.238468	0.149322	1.3295e-15	0.0251421	0.982983	0.921689
522	pyruvate	1595	TRUE	0.0680304	0.00531115	-0.102609	-0.0185921	0.0834719	0.0140616	-0.00909843	-0.096722	-0.00423953	0.00640096	0.753896	0.94355	0.0979383	0.89744	0.284445	0.857251	0.915193	0.251236	0.160824	0.268177	0.982983	0.511277
412	linoleoylcarnitine (C18:2)*	1595	TRUE	-1.09137	0.00486009	0.000155517	-0.114468	-0.0619002	-0.236443	0.0656804	-0.0724377	0.0163525	0.0117896	3.0019e-07	0.947374	0.997961	0.418859	0.418751	0.00206276	0.433569	0.381394	3.58974e-08	0.0377545	0.982983	0.998455
0	1-(1-enyl-oleoyl)-GPC (P-18:1)*	1595	TRUE	-0.204351	-0.00490643	0.0917283	-0.0365879	-0.00156319	-0.0140269	-0.00662459	0.0815525	0.010574	-0.0143181	0.344267	0.947621	0.137331	0.798918	0.983939	0.856993	0.937932	0.331267	0.000443749	0.0128653	0.982983	0.563485
407	leucylalanine	1595	TRUE	0.316039	0.00483343	-0.00403164	0.252094	0.120519	0.109068	-0.0741921	-0.0350973	-0.00348132	-0.00705181	0.146889	0.948825	0.948361	0.0817268	0.123732	0.164642	0.387092	0.678378	0.251414	0.224367	0.982983	0.985038
262	aspartate	1595	TRUE	-1.77147	0.00457883	-0.0185403	-0.115431	-0.04315	-0.101286	0.107353	0.0278408	0.0147223	0.0406274	9.73749e-17	0.950463	0.760886	0.415404	0.573357	0.187315	0.200997	0.736795	7.20239e-07	8.5359e-13	0.982983	0.956833
517	pyridoxate	1595	TRUE	-0.468038	-0.00436548	-0.0627547	-0.286725	-0.0918223	-0.092861	0.00832041	-0.0152251	0.0128908	-0.00531044	0.0310788	0.953606	0.311653	0.0469162	0.239187	0.235061	0.92245	0.856731	2.02364e-05	0.358472	0.982983	0.717539
240	7-alpha-hydroxy-3-oxo-4-cholestenoate (7-Hoca)	1595	TRUE	-1.29338	0.00425863	-0.0574243	0.186125	-0.114174	-0.0180307	0.0424605	0.0786866	0.00528168	0.0405446	1.08969e-09	0.953696	0.343535	0.186944	0.134303	0.813521	0.611273	0.339775	0.0739868	7.34233e-13	0.982983	0.752404
100	1-palmitoyl-2-linolenoyl-GPC (16:0/18:3)*	1595	TRUE	-1.01133	0.00426806	-0.0190325	-0.314558	-0.0463026	-0.0507351	0.0106773	-0.0976523	0.00797569	0.0256458	2.57608e-06	0.95422	0.756791	0.027795	0.54915	0.512614	0.899668	0.242528	0.00777759	7.61215e-06	0.982983	0.955116
386	hypotaurine	1595	TRUE	1.51002	-0.00423492	-0.0754319	-0.117428	0.0293735	-0.0920843	0.114452	-0.0925133	-0.0074501	-0.0432214	2.39097e-12	0.954647	0.220389	0.412183	0.704378	0.235408	0.177218	0.268967	0.013055	5.0243e-14	0.982983	0.658154
644	X - 12681	1595	TRUE	-2.24244	0.00401549	-0.016336	-0.0283187	0.0799945	-0.0594039	0.0216584	-0.0609429	0.0236611	0.0400168	1.08468e-26	0.955819	0.785115	0.839001	0.28844	0.431647	0.793066	0.454385	5.5351e-16	7.85872e-13	0.982983	0.961691
571	thymine	1595	TRUE	-1.1531	0.00385461	-0.0324373	0.0369299	-0.109559	-0.0872401	-0.153008	-0.0934696	0.0171619	0.0137722	8.94418e-08	0.95876	0.598595	0.796699	0.157465	0.261473	0.0715459	0.264562	1.11695e-08	0.0165204	0.982983	0.902091
547	sphingosine 1-phosphate	1595	TRUE	-0.425301	0.00389991	-0.0689844	-0.188314	-0.105147	-0.183447	0.0826245	0.00702201	0.00456898	0.00988425	0.0521017	0.958906	0.270198	0.195735	0.181483	0.020044	0.337882	0.934211	0.134216	0.0901805	0.982983	0.708818
223	5,6-dihydrothymine	1595	TRUE	-0.657786	-0.00380189	0.0634757	0.0199937	-0.265997	-0.157773	-0.220303	-0.140723	0.00605751	0.0188716	0.00235259	0.959437	0.30429	0.889381	0.00062012	0.0428529	0.00967235	0.0939294	0.0443781	0.00105401	0.982983	0.717539
168	2-oleoyl-GPC (18:1)*	1595	TRUE	-0.14108	-0.00378154	0.107128	-0.168838	-0.0714839	-0.013336	-0.00752279	0.0799404	0.00842534	-0.012467	0.515389	0.959771	0.0838643	0.241555	0.359079	0.864476	0.929803	0.342743	0.00529953	0.0309524	0.982983	0.490437
493	phenylalanine	1595	TRUE	-2.33442	-0.0035247	-0.0242705	-0.125716	-0.11622	-0.261733	-0.025824	-0.212079	0.0275234	0.0414767	1.99925e-29	0.960761	0.681932	0.361511	0.118687	0.000456121	0.751665	0.0084413	1.55199e-21	5.83319e-14	0.982983	0.921689
116	1-palmityl-GPC (O-16:0)	1595	TRUE	0.0572466	-0.00339779	0.121511	-0.091739	-0.0317364	-0.061266	-0.0110946	0.0834717	0.00406504	-0.0114249	0.792685	0.964004	0.0508821	0.526322	0.685151	0.434933	0.897066	0.323903	0.180388	0.0489593	0.98496	0.429925
136	1-stearoyl-GPI (18:0)	1595	TRUE	-0.807444	0.00287863	0.150852	0.0263606	-0.0869707	0.0057897	-0.0767748	0.0118534	0.0107476	0.00949922	0.000188612	0.969281	0.0146297	0.854497	0.263098	0.940758	0.367221	0.887795	0.000360796	0.0991699	0.986416	0.343132
130	1-stearoyl-2-linoleoyl-GPI (18:0/18:2)	1595	TRUE	0.487166	0.00277855	-0.0359119	-0.131962	-0.0780981	-0.0719335	-0.0822023	-0.135146	-0.00465038	-0.00608239	0.0249871	0.970495	0.563046	0.360995	0.317335	0.358218	0.336728	0.109441	0.124574	0.293461	0.986416	0.893899
645	X - 12686	1595	TRUE	-1.10356	-0.0026018	-0.0226962	0.0452273	0.0939488	3.44191e-05	0.152362	0.0891256	0.0129816	0.0149045	6.04634e-08	0.970524	0.696578	0.738369	0.199369	0.999626	0.0574774	0.260067	4.7822e-06	0.00602322	0.986416	0.921689
437	N6-acetyllysine	1595	TRUE	-1.4943	0.00274321	-0.0107815	0.153276	-0.0814067	-0.206182	-0.11101	-0.101726	0.0185992	0.024945	4.46397e-12	0.970676	0.861249	0.285475	0.294051	0.00802451	0.19156	0.22516	6.26217e-10	1.44233e-05	0.986416	0.966655
319	Fibrinopeptide A, des-ala(1)*	1595	TRUE	0.3836	0.00245535	0.0329768	0.375377	0.0396195	0.0347292	-0.270018	-0.109207	-0.00732279	0.00061944	0.0771163	0.973887	0.594836	0.00926056	0.611434	0.656875	0.00157658	0.195188	0.0154342	0.914671	0.987245	0.902091
625	X - 11880	1595	TRUE	0.317992	-0.00239061	0.0148378	0.15726	-0.156795	-0.10565	-0.0174742	-0.0118768	-0.0206412	0.0312283	0.135756	0.974117	0.807527	0.267052	0.0406766	0.168886	0.835071	0.885957	3.64387e-12	3.81408e-08	0.987245	0.961691
154	2-hydroxyglutarate	1595	TRUE	0.361702	0.00226885	0.0502682	-0.0977812	-0.0101845	-0.0225865	0.076481	-0.12736	-0.00427001	-0.00532378	0.0983105	0.976068	0.421358	0.501387	0.896945	0.774462	0.374663	0.134046	0.161292	0.361063	0.987891	0.812464
675	X - 16134	1595	TRUE	0.628077	-0.00147711	0.0418052	0.322396	0.0250569	0.0692075	-0.317288	-0.122052	-0.00946013	-0.00425848	0.0035761	0.984186	0.497349	0.0244663	0.746382	0.372882	0.000185555	0.145035	0.00163503	0.458407	0.994768	0.838717
649	X - 12792	1595	TRUE	1.0129	0.00127318	-0.0489046	0.0913531	0.0964995	0.219139	-0.0108827	-0.139337	-0.0127773	-0.0160142	2.45819e-06	0.98633	0.425942	0.522646	0.211648	0.00466222	0.897699	0.0952429	1.99046e-05	0.00517084	0.995598	0.815034
485	palmitoylcarnitine (C16)	1595	TRUE	-2.3903	-0.000831044	0.0142662	-0.208766	-0.082421	-0.166808	0.0409498	0.0141624	0.0316343	0.031286	4.05364e-31	0.99069	0.80852	0.127423	0.265646	0.0246189	0.613707	0.859557	3.04766e-28	1.19826e-08	0.997634	0.961691
650	X - 12798	1595	TRUE	-0.481066	0.000848999	-0.04672	0.375163	0.000617921	0.0224166	-0.0790998	-0.0435769	0.00319896	0.0126984	0.0271618	0.991001	0.452715	0.00954583	0.9937	0.775069	0.356228	0.606467	0.291688	0.0285985	0.997634	0.824699
524	quinolinate	1595	TRUE	-2.02926	-0.000690327	0.0574291	0.129672	-0.204639	-0.0296512	-0.235477	-0.0458736	0.0175079	0.0473916	3.28022e-22	0.99239	0.3371	0.351509	0.0065375	0.694259	0.0042867	0.57279	1.95466e-09	1.96232e-17	0.997697	0.747786
352	glutarate (C5-DC)	1595	TRUE	-0.546528	0.00032562	0.098283	0.00278148	-0.108658	-0.197831	-0.0159531	-0.0155774	0.00510675	0.0130483	0.0118426	0.996539	0.113185	0.984626	0.163811	0.0114436	0.851985	0.8535	0.0914193	0.0240978	0.998176	0.542134
117	1-pentadecanoyl-2-linoleoyl-GPC (15:0/18:2)*	1595	TRUE	-1.08091	-0.000269884	0.11452	-0.357676	0.0609187	-0.0160522	-0.0781894	-0.168877	0.0249533	-0.00637948	2.69356e-07	0.997035	0.0564811	0.0104491	0.419858	0.832077	0.344655	0.03858	1.55388e-17	0.25447	0.998176	0.446856
716	X - 21796	1595	TRUE	-0.846553	-0.000271055	-0.0142323	0.0526846	-0.139506	-0.190633	-0.076268	-0.00891045	0.0119848	0.0126435	9.55518e-05	0.997116	0.818425	0.714894	0.0735946	0.014735	0.371987	0.915812	7.3513e-05	0.0287153	0.998176	0.961691
348	glucose	1595	TRUE	-1.12266	-0.000170268	-0.0348568	0.185724	0.0824982	0.0578116	-0.00502541	-0.0352031	0.00168473	0.0396784	1.88339e-07	0.998176	0.57126	0.194711	0.286675	0.456396	0.952762	0.674069	0.57464	4.7545e-12	0.998176	0.900902

## Sheet: Male APOE TwinsUK
	col1	n	converged	Intercept	C(APOE_Status, Treatment(reference=1))[T.E2]	C(APOE_Status, Treatment(reference=1))[T.E4]	Statin_User[T.Yes]	MetBatch[T.b2]	MetBatch[T.b3]	MetBatch[T.b4]	MetBatch[T.b5]	Age	BMI	Intercept_p	C(APOE_Status, Treatment(reference=1))[T.E2]_p	C(APOE_Status, Treatment(reference=1))[T.E4]_p	Statin_User[T.Yes]_p	MetBatch[T.b2]_p	MetBatch[T.b3]_p	MetBatch[T.b4]_p	MetBatch[T.b5]_p	Age_p	BMI_p	E2_pval_adj	E4_pval_adj
[truncated: 752 more rows]

[truncated: 4 more sheets: Pre-Adjusted Enrichment, sex st, TwinsUK Bottom CA, TwinsUK Middle CA, TwinsUK Top CA]
