# Supplementary material for: APOE genotype and biological age impact inter-omic associations related to bioenergetics
Source: Aging (Albany NY). 2025 May 3;17(5):1105–38. doi: 10.18632/aging.206243 (PMC12151507; doi:10.18632/aging.206243)
Supplement: Supplementary File 5 [file aging-17-206243-s007.xlsx]

## Sheet: Info
Supplementary File 5. contains the results data for the validation cohort (TwinsUK) inter-omic interaction analysis.
Explainer
E2 defined as E2/E2 and E2/E3; E4 defined as E3/E4 and E4/E4; E3 defined as E3/E3
Bio_Young defined as females with biological age (BA) 7.5 years less than chronological age (CA) or males with BA 5 years less than CA, Bio_Old defined as females with BA 7.5 years older than CA or males with BA 5 years older than CA
Each tab is the full results of the model comparing either E2 or E4 to E3 OR Bio Young or Bio Old to BA~CA, stratified by sex
p adj by FDR Benjamini-Hochberg, FDR set to 5%
interactions tested for each group are those significant (pFDR < 0.1) form Arivale, plus those between (Glucose, HDL, LDL, Triglycerides or Total Cholesterol) and (metabolites in the 'TCA Cycle', 'Glycolysis, Gluconeogenesis, and Pyruvate Metabolism', 'Fructose, Mannose and Galactose Metabolism', or 'Pentose Metabolism' subpathways)
model:
clinical_chem = intercept + metabolite + X + metabolite*X + age + BMI + cholesterol meds (user) + e
where X is either APOE E2 or E4, or Bio_Young or Bio_Old
Three additional models were included, with X being the number of e2 alleles; the number of e4 alleles; or the continuous delta age value. These models were not stratified by sex

## Sheet: F_E2
	col1	col2	n	converged	Intercept	C(APOE_Status, Treatment(reference=1))[T.E2]	Statin_User[T.Yes]	analyte2	analyte2:C(APOE_Status, Treatment(reference=1))[T.E2]	Age	BMI	Intercept_p	C(APOE_Status, Treatment(reference=1))[T.E2]_p	Statin_User[T.Yes]_p	analyte2_p	analyte2:C(APOE_Status, Treatment(reference=1))[T.E2]_p	Age_p	BMI_p	pval_adj
121	HDL	trimethylamine N-oxide	1023	TRUE	2.47279	-0.140277	-0.173535	-0.019224	0.0994489	0.00639899	-0.0357264	9.66343e-75	0.0157258	0.0524039	0.208881	0.000225453	0.000149124	5.8085e-34	0.0874388
130	LDL	1-palmitoyl-2-stearoyl-GPC (16:0/18:0)	1023	TRUE	1.05839	0.492767	-0.132297	1.95997	-0.937845	-0.0078681	0.0237214	0.0002685	0.0674217	0.427602	5.12595e-65	0.000304135	0.0118617	2.17681e-05	0.0874388
182	HDL	1-myristoyl-2-linoleoyl-GPC (14:0/18:2)*	1023	TRUE	1.99759	0.366042	-0.180999	0.333856	-0.316166	0.00801577	-0.0361508	2.41128e-46	0.000629052	0.0376643	1.27278e-16	0.000691853	9.90985e-07	2.33474e-36	0.132605
152	Tot-cholesterol	1-palmitoyl-2-stearoyl-GPC (16:0/18:0)	1023	TRUE	2.80803	0.515704	-0.158954	2.40174	-0.866532	0.00102115	0.00944772	2.13568e-21	0.0600553	0.349068	1.93892e-93	0.00104286	0.748313	0.0965797	0.149912
106	HDL	1-palmitoyl-2-palmitoleoyl-GPC (16:0/16:1)*	1023	TRUE	2.22822	0.267212	-0.185954	0.205136	-0.202041	0.00710627	-0.0382919	1.17029e-61	0.00205993	0.0344019	5.39406e-12	0.00145434	1.63614e-05	5.30531e-39	0.167249
176	HDL	1-myristoyl-2-palmitoyl-GPC (14:0/16:0)	1023	TRUE	2.12733	0.249173	-0.181193	0.228734	-0.195379	0.00699591	-0.0349503	1.5889e-54	0.00255662	0.0386602	1.67571e-13	0.00228263	2.07519e-05	1.06045e-33	0.196666
21	LDL	1,2-dipalmitoyl-GPC (16:0/16:0)	1023	TRUE	1.92174	0.507149	-0.0626205	1.51389	-0.992412	-0.0099356	0.0137783	8.16781e-10	0.143314	0.728831	3.2522e-26	0.00241341	0.00339949	0.0213174	0.196666
198	Triglycerides	glycerate	1201	TRUE	-1.1275	0.507634	0.21493	-0.0273929	-0.433913	0.006489	0.032563	2.89991e-18	0.00086486	0.00923948	0.662932	0.00277023	4.72791e-06	2.94259e-26	0.196666
554	Glucose	glycerate	1097	TRUE	1.29124	-0.121627	0.00966084	-0.00484108	0.110536	0.00219236	0.00700374	3.72193e-218	0.000604886	0.656373	0.742811	0.00328878	1.70138e-06	2.69626e-19	0.196666
133	HDL	sphingomyelin (d18:1/24:1, d18:2/24:0)*	998	TRUE	2.10437	-0.484674	-0.155232	0.296857	0.528834	0.00613335	-0.0342649	2.81478e-46	0.00991258	0.0772352	2.01461e-07	0.00342027	0.000219006	1.60285e-31	0.196666
224	Tot-cholesterol	1,2-dipalmitoyl-GPC (16:0/16:0)	1023	TRUE	3.64831	0.551163	-0.0666459	2.06187	-0.962644	-0.0019428	-0.00156369	1.60136e-29	0.123768	0.721113	2.19949e-44	0.00439936	0.579423	0.800384	0.229966
397	HDL	choline	1023	TRUE	2.54396	-0.50328	-0.199423	-0.14565	0.554254	0.00701788	-0.0355724	8.77531e-60	0.0205633	0.0262022	0.12205	0.0131908	3.08662e-05	3.58619e-33	0.632059
298	Triglycerides	3-hydroxyisobutyrate	1196	TRUE	-1.16387	-0.0745362	0.220914	-0.0805718	0.136699	0.00729722	0.0343031	6.21408e-27	0.317412	0.00758164	0.00457005	0.0238248	6.7804e-07	1.91386e-28	0.652347
369	Triglycerides	3-methylglutaconate	1181	TRUE	-1.16878	-0.0938725	0.220984	0.0448656	0.154	0.00588073	0.0325076	2.8458e-26	0.247426	0.00918865	0.126355	0.0230225	3.80466e-05	3.63508e-26	0.652347
74	HDL	1-margaroyl-2-oleoyl-GPC (17:0/18:1)*	1023	TRUE	2.01003	0.319312	-0.22449	0.371612	-0.268622	0.00534594	-0.0319046	4.89561e-45	0.0150853	0.0106136	4.48555e-13	0.0228396	0.00126702	1.40856e-27	0.652347
37	HDL	sphingosine	941	TRUE	2.47453	-0.186213	-0.211042	-0.132273	0.203377	0.0075933	-0.0344627	2.98453e-70	0.053082	0.0210833	4.03891e-05	0.0213767	1.1807e-05	3.64282e-30	0.652347
103	Triglycerides	1-stearoyl-2-docosahexaenoyl-GPE (18:0/22:6)*	1201	TRUE	-0.960101	-0.100127	0.156105	0.390131	0.124428	0.000230859	0.0220421	2.41789e-26	0.13985	0.0231713	4.97975e-74	0.0208473	0.849746	1.87346e-17	0.652347
185	Glucose	palmitoyl-linoleoyl-glycerol (16:0/18:2) [1]*	1028	TRUE	1.29092	0.0116256	0.0100901	0.0393627	-0.0338907	0.00197467	0.0058932	5.87383e-262	0.529198	0.650181	1.56324e-07	0.0194748	2.01105e-05	6.51201e-13	0.652347
34	Triglycerides	1-pentadecanoyl-2-linoleoyl-GPC (15:0/18:2)*	1201	TRUE	-1.30895	-0.215074	0.264124	0.168907	0.264063	0.00587175	0.0331109	4.70997e-29	0.0788652	0.00128613	0.000360319	0.0190748	3.2303e-05	2.15242e-27	0.652347
211	HDL	methylsuccinate	1019	TRUE	2.39255	0.250197	-0.201511	-0.00465767	-0.189369	0.00730545	-0.0356182	2.64338e-67	0.0119934	0.0250055	0.887889	0.016159	1.47e-05	1.55965e-33	0.652347
312	HDL	1-palmitoyl-2-adrenoyl-GPC (16:0/22:4)*	1022	TRUE	2.38731	0.199877	-0.188644	0.0822448	-0.145401	0.00612054	-0.0364633	1.72468e-68	0.0124455	0.0346959	0.00488295	0.0151014	0.000296515	1.47056e-34	0.652347
378	HDL	1-stearoyl-2-oleoyl-GPC (18:0/18:1)	1023	TRUE	2.05632	0.275958	-0.220182	0.310702	-0.224541	0.00713131	-0.0356114	6.18347e-47	0.0167703	0.012512	5.17465e-11	0.0255107	1.57848e-05	1.7178e-34	0.666756
307	HDL	1-pentadecanoyl-2-linoleoyl-GPC (15:0/18:2)*	1023	TRUE	2.05997	0.292798	-0.174155	0.295636	-0.254648	0.00663537	-0.0334192	2.77659e-47	0.0235822	0.0484024	6.4759e-11	0.0290916	6.0235e-05	2.53644e-30	0.727291
189	LDL	1-stearoyl-2-docosahexaenoyl-GPC (18:0/22:6)	1023	TRUE	3.04175	-0.181003	-0.165804	0.584858	-0.279303	-0.0120934	0.00979475	5.33201e-26	0.431759	0.370668	5.83919e-14	0.132181	0.000578526	0.109497	0.792723
366	HDL	isoleucine	1022	TRUE	2.77626	-0.247131	-0.215748	-0.488678	0.265168	0.00723624	-0.0308622	3.37099e-77	0.198379	0.0148924	1.78248e-08	0.134399	1.31906e-05	2.57017e-24	0.792723
296	HDL	phosphatidylcholine (16:0/22:5n3, 18:1/20:4)*	1023	TRUE	1.8633	0.273702	-0.200611	0.468474	-0.218538	0.00617541	-0.0327723	2.47882e-35	0.0944109	0.0218262	1.40815e-13	0.134548	0.000172078	1.55891e-29	0.792723
19	Triglycerides	alpha-ketoglutarate	1201	TRUE	-1.14283	-0.0268667	0.230936	-0.00763169	0.103866	0.00643532	0.0324313	7.77877e-26	0.722221	0.00538371	0.809787	0.134649	1.12816e-05	2.36998e-25	0.792723
241	Triglycerides	1,5-anhydroglucitol (1,5-AG)	1199	TRUE	-1.07509	-0.114026	0.233255	-0.0823302	0.185547	0.00629401	0.0330101	1.09194e-19	0.387857	0.00481062	0.0856806	0.135862	9.84962e-06	6.43592e-27	0.792723
330	Tot-cholesterol	3-methylglutaconate	996	TRUE	6.18523	-0.677028	-0.0427932	-0.391381	0.208463	0.00287313	-0.0113147	1.33099e-89	0.000135475	0.837507	4.89274e-10	0.13546	0.452171	0.09025	0.792723
229	Tot-cholesterol	1-stearoyl-2-arachidonoyl-GPI (18:0/20:4)	1022	TRUE	5.89889	-0.91802	-0.179114	0.00958802	0.440098	0.000510691	-0.0123033	2.18778e-70	0.00551838	0.382007	0.941331	0.129881	0.894286	0.0687978	0.792723
407	HDL	3-hydroxy-2-ethylpropionate	1023	TRUE	2.34673	0.203861	-0.19841	0.0643228	-0.153344	0.00687677	-0.0358179	3.61782e-63	0.101696	0.0272897	0.160099	0.136219	5.23967e-05	1.77242e-33	0.792723
236	Glucose	oleoyl-linoleoyl-glycerol (18:1/18:2) [1]	1096	TRUE	1.28422	0.00424125	0.00701773	0.0285488	-0.0249083	0.00196748	0.00647887	1.55192e-276	0.84591	0.744992	0.000240244	0.136777	1.24987e-05	1.88291e-16	0.792723
238	Glucose	1-palmitoyl-2-oleoyl-GPC (16:0/18:1)	1098	TRUE	1.30742	-0.0836517	0.0100504	-0.00671501	0.0579096	0.00202995	0.00687769	3.30719e-224	0.0494619	0.644841	0.687765	0.134782	8.04542e-06	1.01072e-18	0.792723
207	Tot-cholesterol	1-stearoyl-2-docosahexaenoyl-GPC (18:0/22:6)	1023	TRUE	5.15995	-0.0825084	-0.204609	0.815195	-0.295692	-0.00497885	-0.00705487	7.73004e-65	0.733392	0.293695	2.48043e-23	0.129771	0.178014	0.273149	0.792723
294	HDL	1-palmitoyl-2-linoleoyl-GPE (16:0/18:2)	1023	TRUE	2.43447	0.140014	-0.184885	-0.0364003	-0.0893016	0.00675968	-0.0345284	8.85541e-71	0.0729945	0.0391107	0.176505	0.112194	5.79471e-05	3.89081e-31	0.792723
116	Tot-cholesterol	1-palmitoyl-2-arachidonoyl-GPC (16:0/20:4n6)	1023	TRUE	4.92365	0.089279	-0.184561	0.889764	-0.450605	0.00111298	-0.0146007	7.50392e-51	0.792159	0.355106	1.03866e-12	0.125877	0.766239	0.0265626	0.792723
180	Triglycerides	ethylmalonate	1201	TRUE	-1.18358	0.160988	0.237575	0.0230949	-0.0705183	0.00642838	0.0327248	1.44732e-27	0.0197371	0.00408264	0.329491	0.125588	7.43531e-06	1.76576e-26	0.792723
290	LDL	sphingomyelin (d18:1/20:1, d18:2/20:0)*	1023	TRUE	1.80383	0.0665717	-0.0670512	1.81336	-0.51536	-0.00861427	0.00414985	1.37677e-09	0.844804	0.701908	1.33181e-38	0.124813	0.0087351	0.47169	0.792723
156	LDL	sphingomyelin (d18:2/24:1, d18:1/24:2)*	1023	TRUE	1.76278	0.0429494	0.0490922	1.73035	-0.46989	-0.0116563	0.0125998	1.19875e-09	0.8951	0.777001	3.56642e-45	0.124345	0.000336789	0.0272251	0.792723
310	Glucose	palmitoyl-linoleoyl-glycerol (16:0/18:2) [2]*	1037	TRUE	1.29011	0.000253085	0.0072884	0.0339345	-0.0217836	0.00208983	0.00583406	2.22658e-268	0.988808	0.742404	2.81612e-06	0.122351	5.43902e-06	6.62023e-13	0.792723
256	LDL	malate	968	TRUE	3.74659	-0.78167	-0.130974	-0.316601	0.249863	-0.00598785	0.00713079	1.20727e-37	2.23101e-05	0.503565	1.84551e-05	0.117096	0.102688	0.273119	0.792723
46	Tot-cholesterol	1-myristoyl-2-palmitoyl-GPC (14:0/16:0)	1023	TRUE	5.11557	-0.187754	-0.162107	0.627888	-0.225178	0.0011391	-0.010844	1.02562e-62	0.309678	0.408298	1.51371e-19	0.116059	0.75669	0.0933061	0.792723
337	HDL	citrate	1023	TRUE	2.31021	0.224285	-0.202687	0.127874	-0.177402	0.00632281	-0.0356713	1.00083e-60	0.088807	0.0239825	0.0171008	0.115772	0.000246528	1.37291e-33	0.792723
406	HDL	lactate	1023	TRUE	2.52262	-0.212326	-0.194842	-0.155056	0.251499	0.00701504	-0.0343974	2.97283e-71	0.164789	0.0299695	0.01434	0.114369	3.05572e-05	1.07141e-29	0.792723
564	HDL	3-hydroxyisobutyrate	1007	TRUE	2.36371	0.143467	-0.190626	0.0502505	-0.0849812	0.00669214	-0.0358029	1.44645e-65	0.0872578	0.0371769	0.0645622	0.136995	9.11438e-05	2.64358e-33	0.792723
200	Triglycerides	1-palmitoyl-2-eicosapentaenoyl-GPC (16:0/20:5)*	1201	TRUE	-1.18453	0.175849	0.247831	0.070622	-0.0921916	0.00548056	0.0328999	4.66614e-28	0.0266698	0.00261866	0.00691746	0.127474	0.000228997	5.4049e-27	0.792723
17	Tot-cholesterol	oleoyl-linoleoyl-glycerol (18:1/18:2) [1]	1022	TRUE	5.91724	-0.696286	-0.193612	0.00143102	0.212448	0.00090403	-0.0135474	9.12134e-82	0.000203699	0.34333	0.983192	0.138076	0.813518	0.0490971	0.792723
528	LDL	phosphatidylcholine (16:0/22:5n3, 18:1/20:4)*	1023	TRUE	2.55471	-0.013543	-0.166113	0.872193	-0.443457	-0.00947322	0.0113814	1.45995e-15	0.969023	0.372886	1.04126e-10	0.154206	0.00684634	0.0659201	0.792723
203	LDL	isovalerylcarnitine (C5)	1021	TRUE	3.50235	-0.249124	-0.152016	0.131868	-0.241182	-0.00844453	0.00439002	3.76779e-34	0.205511	0.424598	0.0983344	0.140671	0.0183441	0.493957	0.792723
471	Glucose	1-stearoyl-2-linoleoyl-GPE (18:0/18:2)*	1097	TRUE	1.26587	0.00229223	0.00838471	0.0392063	-0.0211596	0.00207808	0.00633536	1.89611e-270	0.913569	0.693756	2.51349e-08	0.170952	2.93414e-06	2.41777e-16	0.792723
13	LDL	mannitol/sorbitol	1023	TRUE	3.55924	-0.603082	-0.111365	-0.0247756	0.0424711	-0.00744918	0.00719078	1.06767e-35	2.00692e-09	0.559213	0.0287616	0.170365	0.0378303	0.252054	0.792723
379	Triglycerides	ribonate	1200	TRUE	-1.22474	-0.0646926	0.22963	0.116694	0.134813	0.00581169	0.0317969	7.8351e-29	0.554778	0.00508504	0.00327738	0.170245	4.23319e-05	3.47642e-25	0.792723
81	HDL	palmitoyl-linoleoyl-glycerol (16:0/18:2) [1]*	958	TRUE	2.4639	-0.0124326	-0.180484	-0.291877	0.0683288	0.00654874	-0.0268323	2.57737e-82	0.84511	0.0339917	5.71916e-28	0.169663	3.56477e-05	1.64403e-20	0.792723
408	Triglycerides	isobutyrylglycine	1195	TRUE	-1.22655	0.188214	0.233177	0.0729675	-0.106694	0.00654467	0.0320974	1.66052e-28	0.0379899	0.00477752	0.0264689	0.169213	4.37577e-06	7.97713e-25	0.792723
63	Tot-cholesterol	1-stearoyl-2-oleoyl-GPC (18:0/18:1)	1023	TRUE	4.50122	-0.0936779	-0.292957	1.24634	-0.296908	0.00166986	-0.0135047	1.02606e-48	0.705303	0.121694	1.38504e-34	0.168938	0.637676	0.0304869	0.792723
466	Triglycerides	1-myristoyl-2-palmitoyl-GPC (14:0/16:0)	1201	TRUE	-1.22897	-0.0515527	0.249849	0.17536	0.097288	0.00492718	0.0315093	4.75604e-31	0.547636	0.00192833	2.84136e-08	0.165296	0.000451469	5.95889e-26	0.792723
341	Tot-cholesterol	glycerate	1023	TRUE	5.93632	-0.0361801	-0.194561	0.00276423	-0.439405	0.000173083	-0.0125721	1.53886e-63	0.903379	0.341505	0.98291	0.16277	0.964492	0.0638741	0.792723
489	Glucose	lactate	1098	TRUE	1.22446	0.0372638	0.0078456	0.11568	-0.0563958	0.00202343	0.0054791	1.38668e-248	0.338992	0.708468	2.55558e-14	0.161312	3.50953e-06	9.97564e-13	0.792723
409	Glucose	sphingomyelin (d18:2/16:0, d18:1/16:1)*	1098	TRUE	1.37669	-0.088886	0.00418975	-0.0816296	0.0628052	0.00207767	0.00716566	1.13993e-263	0.0652624	0.845583	3.78554e-06	0.161257	3.5633e-06	1.37286e-20	0.792723
561	HDL	palmitoyl dihydrosphingomyelin (d18:0/16:0)*	1023	TRUE	1.89175	-0.172728	-0.137861	0.406994	0.224373	0.00682727	-0.0320598	7.56266e-36	0.268972	0.114688	3.71662e-12	0.139371	3.00017e-05	2.39678e-28	0.792723
496	Triglycerides	methylsuccinate	1197	TRUE	-1.18326	0.188782	0.228839	0.0137323	-0.104506	0.0065471	0.032919	1.02263e-26	0.0324103	0.00557239	0.700419	0.161078	4.97716e-06	8.02871e-27	0.792723
58	HDL	tricosanoyl sphingomyelin (d18:1/23:0)*	766	TRUE	2.33608	-0.131233	-0.150956	0.10489	0.192368	0.00810154	-0.0390376	1.48532e-45	0.344836	0.143635	0.0126792	0.157505	3.39006e-05	1.26192e-30	0.792723
69	HDL	palmitoyl sphingomyelin (d18:1/16:0)	1023	TRUE	1.70444	-0.313847	-0.125152	0.617119	0.365873	0.00620512	-0.0312098	1.27859e-24	0.173081	0.15247	5.31432e-12	0.110068	0.000149038	1.18351e-26	0.792723
562	Tot-cholesterol	isovalerylglycine	1009	TRUE	6.08665	-0.707547	-0.183026	-0.24461	0.30121	0.000751947	-0.0107078	6.26455e-81	0.00103833	0.370842	0.00877904	0.152671	0.845002	0.114418	0.792723
1	Triglycerides	stearoyl sphingomyelin (d18:1/18:0)	1201	TRUE	-1.18353	-0.153876	0.236689	0.0994356	0.230919	0.00558379	0.031695	1.05819e-23	0.347295	0.00413309	0.152895	0.150513	0.000142341	9.73959e-25	0.792723
513	LDL	sphingomyelin (d18:1/20:0, d16:1/22:0)*	998	TRUE	1.08246	0.0788493	-0.138732	2.06122	-0.447553	-0.00566849	0.0113165	0.000135652	0.804659	0.405682	5.73049e-70	0.149421	0.0696144	0.0408627	0.792723
502	Triglycerides	palmitoyl-linoleoyl-glycerol (16:0/18:2) [2]*	1158	TRUE	-1.11099	0.0683112	0.174839	0.409866	-0.0446288	0.00487106	0.0150769	1.1121e-48	0.146666	0.00290304	4.55381e-152	0.148679	1.16521e-06	1.20072e-11	0.792723
461	HDL	leucine	1022	TRUE	2.84421	-0.283738	-0.218405	-0.510405	0.307737	0.00677348	-0.031941	1.21052e-68	0.205352	0.0141715	1.43603e-06	0.148215	4.88193e-05	5.69421e-26	0.792723
213	Triglycerides	glycerophosphoethanolamine	1201	TRUE	-1.37745	-0.0564298	0.21837	0.215247	0.116454	0.00610801	0.0326389	9.44262e-38	0.550097	0.00574753	6.61641e-13	0.146715	7.20934e-06	1.08386e-28	0.792723
385	Glucose	alpha-ketoglutarate	1097	TRUE	1.2978	0.0140338	0.0129558	0.0390938	-0.0255859	0.00154469	0.00606381	1.49808e-286	0.608833	0.545762	2.3325e-07	0.145633	0.000741752	9.11213e-15	0.792723
193	Tot-cholesterol	sphingomyelin (d18:2/16:0, d18:1/16:1)*	1023	TRUE	3.27144	0.0832304	0.0768072	2.95204	-0.433699	-0.00263331	-0.0244891	4.86017e-35	0.794256	0.629832	4.84446e-129	0.143493	0.377961	3.23258e-06	0.792723
402	Glucose	1-palmitoyl-2-arachidonoyl-GPE (16:0/20:4)*	1098	TRUE	1.27197	0.00825234	0.00562755	0.026692	-0.0246834	0.00201339	0.00677223	5.78458e-263	0.729919	0.795061	0.00059895	0.157506	8.2288e-06	2.55122e-18	0.792723
186	Glucose	1-palmitoyl-2-docosahexaenoyl-GPE (16:0/22:6)*	1098	TRUE	1.27641	0.0127206	0.0055316	0.0251476	-0.0289616	0.00188064	0.00703037	2.00493e-265	0.608953	0.798908	0.00155986	0.109577	3.74028e-05	1.27906e-19	0.792723
449	Glucose	isoleucine	1097	TRUE	1.18873	0.0647481	0.0122502	0.146144	-0.0827331	0.0019733	0.00545235	2.86348e-203	0.226393	0.562092	3.87577e-11	0.096124	7.6949e-06	4.73389e-12	0.792723
235	Triglycerides	glycerophosphorylcholine (GPC)	1201	TRUE	-1.28509	0.28117	0.234618	0.0968663	-0.20106	0.00647214	0.0336697	8.04886e-26	0.0341897	0.00443817	0.0404754	0.102664	5.02945e-06	1.30883e-27	0.792723
261	Triglycerides	pyruvate	1197	TRUE	-1.14501	-0.0138267	0.24279	0.0138669	0.0876219	0.00640026	0.0317523	6.39427e-26	0.8198	0.00380633	0.480079	0.0724144	8.05331e-06	1.08817e-24	0.792723
484	LDL	1-palmitoyl-2-arachidonoyl-GPC (16:0/20:4n6)	1023	TRUE	3.13955	0.00160969	-0.144613	0.39889	-0.452381	-0.00803155	0.00525893	6.8602e-24	0.996005	0.445133	0.000760776	0.105384	0.0237898	0.399947	0.792723
345	Glucose	tiglylcarnitine (C5:1-DC)	1091	TRUE	1.28835	-0.07964	0.0102786	0.0121293	0.0530752	0.00198361	0.00694116	1.68384e-264	0.017323	0.636785	0.291693	0.0700291	1.59875e-05	5.18799e-19	0.792723
549	Glucose	1-stearoyl-2-oleoyl-GPE (18:0/18:1)	1082	TRUE	1.27629	0.00341769	0.000340222	0.0441407	-0.0207359	0.00211682	0.00552929	4.03617e-288	0.844912	0.986978	1.11594e-16	0.06511	1.37056e-06	6.6731e-13	0.792723
48	HDL	2-hydroxy-3-methylvalerate	1023	TRUE	2.42377	-0.137312	-0.191951	0.00893331	0.14011	0.00695792	-0.0365824	2.82106e-70	0.153103	0.0326104	0.759817	0.0632736	3.56753e-05	4.52988e-34	0.792723
97	Triglycerides	sphinganine	709	TRUE	-1.22233	0.239655	0.308047	0.0394766	-0.191653	0.0069767	0.032947	2.80061e-16	0.043893	0.00377945	0.341689	0.0625644	0.000295277	3.29735e-17	0.792723
371	HDL	sphinganine	452	TRUE	2.34483	-0.115464	-0.200255	-0.0475414	0.225434	0.00772274	-0.0347671	2.10198e-31	0.384724	0.104726	0.327922	0.0578419	0.00130846	4.18191e-16	0.792723
181	Tot-cholesterol	alpha-hydroxyisocaproate	1022	TRUE	5.94765	-1.0004	-0.175647	-0.0256069	0.488941	0.00079446	-0.0132884	2.69189e-75	0.00118964	0.390212	0.801177	0.0577014	0.836065	0.0499805	0.792723
525	LDL	alpha-ketoglutarate	1023	TRUE	3.59478	-0.907994	-0.167261	-0.297917	0.278558	-0.0044717	0.0124808	9.6695e-37	4.8584e-05	0.374258	1.09019e-06	0.0539874	0.216551	0.0496171	0.792723
0	Glucose	1-stearoyl-2-arachidonoyl-GPE (18:0/20:4)	1098	TRUE	1.27113	0.0242728	0.00263355	0.0377184	-0.0375418	0.0019215	0.00651791	9.64934e-271	0.344002	0.902667	3.82132e-06	0.0514363	1.85726e-05	4.56913e-17	0.792723
395	Triglycerides	palmitoyl-linoleoyl-glycerol (16:0/18:2) [1]*	1161	TRUE	-1.17682	0.10921	0.16747	0.414521	-0.0651265	0.0056194	0.0162009	5.87893e-47	0.039871	0.00787811	2.01193e-115	0.0727584	1.65917e-07	1.05895e-11	0.792723
444	Tot-cholesterol	malate	968	TRUE	6.08493	-0.807045	-0.17437	-0.353149	0.334679	0.00315259	-0.0112256	3.13376e-83	4.83976e-05	0.408588	9.24257e-06	0.0514178	0.425206	0.109322	0.792723
553	LDL	sphingomyelin (d18:2/16:0, d18:1/16:1)*	1023	TRUE	1.50271	0.163579	0.0527427	2.32417	-0.596875	-0.0107421	-0.00330178	2.64547e-08	0.615342	0.745536	2.02316e-77	0.0484205	0.000421723	0.538246	0.792723
438	HDL	1-oleoyl-2-dihomo-linolenoyl-GPC (18:1/20:3)*	1022	TRUE	2.36883	0.213538	-0.196599	0.05857	-0.165953	0.00659475	-0.0357565	8.76008e-68	0.0337574	0.0284359	0.116929	0.0482575	9.62535e-05	1.02946e-32	0.792723
11	Glucose	phosphate	1098	TRUE	1.26992	0.205223	0.0090684	0.0257612	-0.229435	0.00207929	0.00694251	4.48403e-104	0.0686073	0.676739	0.577932	0.043114	4.64921e-06	4.12783e-19	0.792723
320	Tot-cholesterol	ethylmalonate	1023	TRUE	5.78211	-0.122375	-0.198154	0.0971661	-0.237004	0.000606179	-0.0123956	7.20477e-78	0.48618	0.332169	0.0496343	0.0417502	0.874426	0.0653153	0.792723
473	Triglycerides	1-myristoyl-2-linoleoyl-GPC (14:0/18:2)*	1201	TRUE	-1.39979	-0.156453	0.269735	0.3534	0.190396	0.00565858	0.0295046	3.36714e-40	0.136728	0.000543787	1.19465e-20	0.0409875	2.48194e-05	2.78133e-24	0.792723
387	HDL	1-stearoyl-2-linoleoyl-GPE (18:0/18:2)*	1022	TRUE	2.44868	0.179658	-0.178098	-0.0639484	-0.119332	0.00659058	-0.0334304	2.75916e-72	0.0259455	0.0459668	0.0180747	0.039934	8.29549e-05	3.67513e-29	0.792723
270	HDL	1-stearoyl-2-dihomo-linolenoyl-GPC (18:0/20:3n3 or 6)*	1023	TRUE	2.35682	0.270124	-0.189282	0.0529701	-0.212319	0.00675955	-0.0355161	8.2471e-65	0.0282121	0.0351124	0.249721	0.0392682	6.04426e-05	1.51986e-30	0.792723
210	LDL	1-stearoyl-2-arachidonoyl-GPI (18:0/20:4)	1022	TRUE	3.67349	-1.12598	-0.13385	-0.0787433	0.55892	-0.00839005	0.00625407	1.39689e-32	0.000249908	0.482106	0.51518	0.038466	0.0188426	0.319683	0.792723
569	Triglycerides	N-palmitoyl-sphingosine (d18:1/16:0)	1201	TRUE	-1.34923	-0.196126	0.246629	0.504471	0.272859	0.00224772	0.0296017	1.17023e-36	0.140429	0.00136213	8.16406e-19	0.0366751	0.103474	7.59625e-25	0.792723
218	Triglycerides	1-stearoyl-2-arachidonoyl-GPE (18:0/20:4)	1201	TRUE	-1.19793	-0.0971685	0.155097	0.476169	0.136514	0.00269732	0.0232156	5.9725e-40	0.19484	0.0250021	1.77545e-67	0.0359382	0.0253229	5.25678e-19	0.792723
304	Glucose	alpha-hydroxyisovalerate	1097	TRUE	1.27933	-0.0669031	0.0096785	0.0175672	0.0402707	0.00221105	0.00648807	2.78922e-259	0.0076821	0.654505	0.0382846	0.0501574	1.06193e-06	1.03595e-16	0.792723
83	HDL	glycerophosphoethanolamine	1023	TRUE	2.34161	0.16817	-0.18654	0.0528878	-0.126616	0.00699919	-0.0354022	1.26671e-61	0.0533904	0.0378529	0.0857051	0.0730812	3.29484e-05	6.04373e-33	0.792723
572	HDL	valine	1023	TRUE	2.90803	-0.372677	-0.213239	-0.607027	0.393895	0.00681655	-0.0306885	1.33801e-72	0.104653	0.0161415	2.30674e-08	0.0701354	4.07331e-05	1.68924e-23	0.792723
508	LDL	1-palmitoyl-2-linoleoyl-GPC (16:0/18:2)	1023	TRUE	0.964395	0.204372	-0.0319855	2.13844	-0.710632	-0.00340762	0.0111784	0.00406686	0.620012	0.85569	4.18379e-37	0.0749442	0.304831	0.0539679	0.792723
533	Glucose	fructose	1097	TRUE	1.15169	0.0328203	0.00698772	0.178971	-0.049483	0.00197473	0.00569229	4.06273e-255	0.299678	0.7162	9.79414e-45	0.102534	8.60036e-07	1.63354e-16	0.792723
158	LDL	alpha-hydroxyisocaproate	1022	TRUE	3.72979	-0.961943	-0.145987	-0.119278	0.393635	-0.0082986	0.00570923	3.35762e-35	0.00080484	0.442539	0.207401	0.100391	0.0201282	0.365236	0.792723
30	Glucose	sphingomyelin (d18:1/17:0, d17:1/18:0, d19:1/16:0)	1098	TRUE	1.3118	0.0446401	0.00555248	-0.017967	-0.0655556	0.00215771	0.0068683	1.32493e-247	0.291274	0.798828	0.20233	0.100164	2.18473e-06	1.28038e-18	0.792723
413	LDL	1-palmitoyl-2-docosahexaenoyl-GPC (16:0/22:6)	1023	TRUE	2.72378	-0.143117	-0.102358	0.730318	-0.339242	-0.0117226	0.0158008	3.11823e-20	0.563183	0.578494	9.42592e-17	0.0999428	0.000766386	0.0103391	0.792723
384	Glucose	1-stearoyl-2-linoleoyl-GPI (18:0/18:2)	1088	TRUE	1.31623	-0.0806824	0.0116963	-0.00802233	0.0605935	0.00188248	0.00690057	9.11034e-233	0.0307865	0.598078	0.58597	0.0994225	3.5199e-05	4.08802e-19	0.792723
269	Tot-cholesterol	N-acetylleucine	1020	TRUE	6.0464	-0.868435	-0.179841	-0.196307	0.450763	0.000367954	-0.0099775	1.96183e-80	0.00154028	0.378199	0.100416	0.0960414	0.923608	0.143918	0.792723
358	Tot-cholesterol	glycerophosphoethanolamine	1023	TRUE	5.49956	-0.119657	-0.181656	0.276385	-0.285956	0.00144038	-0.0105252	3.20915e-66	0.5437	0.371658	7.28211e-05	0.0737233	0.705755	0.11628	0.792723
38	Tot-cholesterol	1-palmitoyl-2-docosahexaenoyl-GPC (16:0/22:6)	1023	TRUE	4.66054	-0.0516071	-0.109194	1.06485	-0.35931	-0.00476678	0.00215741	6.56904e-52	0.841153	0.568789	2.20368e-31	0.093876	0.188299	0.736346	0.792723
480	HDL	phosphate	1023	TRUE	2.39882	0.732373	-0.194117	0.00613533	-0.713934	0.00694729	-0.0354563	2.12539e-25	0.0823074	0.0306994	0.973471	0.092954	3.83801e-05	4.57206e-33	0.792723
521	HDL	1-stearoyl-2-docosapentaenoyl-GPC (18:0/22:5n3)*	1023	TRUE	2.24158	0.223518	-0.199706	0.16264	-0.163065	0.00627712	-0.0350523	7.54617e-57	0.0599423	0.0254079	0.000154085	0.0929009	0.000193841	1.27582e-32	0.792723
309	Triglycerides	galactonate	1126	TRUE	-1.21748	0.0208595	0.18472	-0.0100852	0.0648958	0.00715692	0.0331769	3.78614e-26	0.724408	0.0318912	0.540616	0.0907234	2.57658e-06	2.19462e-26	0.792723
166	Tot-cholesterol	alpha-ketoglutarate	1023	TRUE	5.91456	-0.806988	-0.199691	-0.237422	0.261436	0.0035624	-0.00715483	8.57473e-83	0.000834664	0.326324	0.000324982	0.0942548	0.362311	0.297575	0.792723
325	HDL	1-palmitoyl-2-arachidonoyl-GPI (16:0/20:4)*	963	TRUE	2.46277	0.197913	-0.237415	-0.0421532	-0.133065	0.00663531	-0.0348176	4.37577e-65	0.0477551	0.0126642	0.294276	0.0889667	0.000144047	2.34679e-29	0.792723
560	Triglycerides	1-stearoyl-2-dihomo-linolenoyl-GPC (18:0/20:3n3 or 6)*	1201	TRUE	-1.14538	-0.078097	0.232628	0.603451	0.159658	0.00225344	0.0172047	8.83546e-33	0.434175	0.00126554	7.74643e-51	0.0899437	0.0753986	1.23512e-09	0.792723
77	Tot-cholesterol	methylsuccinate	1019	TRUE	5.85582	-0.055409	-0.202299	0.0397032	-0.315959	0.000769434	-0.0127488	5.18869e-78	0.806309	0.321363	0.596504	0.0769569	0.840576	0.0569272	0.792723
322	LDL	palmitoyl sphingomyelin (d18:1/16:0)	1023	TRUE	-0.31203	0.312015	0.181883	3.37975	-0.721477	-0.0108587	0.028204	0.297294	0.451543	0.247742	7.23188e-98	0.0798731	0.000225011	7.97502e-08	0.792723
529	Tot-cholesterol	1-palmitoyl-2-linoleoyl-GPC (16:0/18:2)	1023	TRUE	2.30674	0.273243	-0.0203901	2.93864	-0.704227	0.00719238	-0.00527066	9.36255e-12	0.510889	0.908496	1.17954e-67	0.0800689	0.0317864	0.367604	0.792723
173	Tot-cholesterol	phosphatidylcholine (16:0/22:5n3, 18:1/20:4)*	1023	TRUE	4.09927	0.203888	-0.215328	1.52746	-0.562461	-0.0016465	-0.00266748	3.33986e-35	0.571793	0.263896	8.15974e-28	0.0805282	0.649347	0.676761	0.792723
90	Tot-cholesterol	lactate	1023	TRUE	6.08728	-1.03926	-0.19851	-0.248231	0.64251	0.0008634	-0.0107479	1.02284e-79	0.00283621	0.331758	0.0850475	0.076642	0.821787	0.120478	0.792723
75	Glucose	1-stearoyl-2-docosahexaenoyl-GPE (18:0/22:6)*	1098	TRUE	1.28618	0.0114246	0.00321553	0.0319708	-0.0270684	0.00174946	0.0066073	2.09281e-279	0.615877	0.881373	2.29008e-06	0.0823333	0.000112648	1.80481e-17	0.792723
43	Glucose	pyruvate	1096	TRUE	1.31251	0.0063652	0.00359433	0.0333232	-0.0174183	0.00155232	0.00554925	8.66766e-308	0.743538	0.865494	2.62225e-15	0.0829388	0.000428585	4.64589e-13	0.792723
507	Triglycerides	choline phosphate	1178	TRUE	-1.17608	-0.103446	0.218036	0.0150619	0.171434	0.00604489	0.0336764	1.15204e-22	0.326317	0.00987838	0.712681	0.084289	2.92376e-05	7.93418e-27	0.792723
142	HDL	1-palmitoyl-2-oleoyl-GPC (16:0/18:1)	1023	TRUE	1.91545	0.280995	-0.211077	0.469462	-0.23924	0.0070496	-0.0360587	4.60884e-39	0.0674563	0.0156424	1.2556e-14	0.0868243	1.67524e-05	5.03615e-36	0.792723
192	Triglycerides	2-methylcitrate/homocitrate	1166	TRUE	-1.21438	0.168576	0.203151	0.074999	-0.109711	0.00607901	0.0326682	2.27829e-25	0.0832113	0.0186792	0.0706238	0.200842	2.46618e-05	1.71453e-25	0.796441
227	Tot-cholesterol	1-stearoyl-2-docosapentaenoyl-GPC (18:0/22:5n3)*	1023	TRUE	4.81687	-0.0778635	-0.251157	1.03724	-0.266539	-0.00299104	-0.0095626	4.72415e-57	0.759958	0.190025	2.24681e-29	0.200376	0.407662	0.130317	0.796441
477	Tot-cholesterol	sphingomyelin (d18:1/20:1, d18:2/20:0)*	1023	TRUE	3.69625	0.0939925	-0.0795388	2.25063	-0.446793	0.000102228	-0.014655	6.24146e-33	0.79007	0.661899	1.80922e-54	0.199932	0.976087	0.0143561	0.796441
295	LDL	1-stearoyl-2-linoleoyl-GPC (18:0/18:2)*	1023	TRUE	1.17235	-0.00986236	-0.142106	1.86898	-0.45152	-0.00373439	0.0123518	0.000230463	0.978652	0.415005	2.93436e-40	0.199279	0.255711	0.0321849	0.796441
416	Triglycerides	3-methyl-2-oxobutyrate	1200	TRUE	-1.14615	0.004584	0.234957	-0.010869	0.0789116	0.00655404	0.0323584	4.25319e-26	0.943562	0.00451101	0.70534	0.198713	6.34506e-06	1.00486e-25	0.796441
5	Tot-cholesterol	sphingomyelin (d18:1/24:1, d18:2/24:0)*	998	TRUE	3.97268	-0.833283	0.00719555	1.72199	0.486524	-0.0026672	-0.00203311	6.70455e-38	0.0342891	0.96881	5.39659e-47	0.198573	0.442824	0.740714	0.796441
234	Triglycerides	1-margaroyl-2-linoleoyl-GPC (17:0/18:2)*	1201	TRUE	-1.30936	-0.11332	0.250422	0.147972	0.184097	0.00581407	0.0341015	6.06944e-26	0.441212	0.00240219	0.00824597	0.194128	4.79677e-05	1.00448e-27	0.796441
157	Triglycerides	phosphatidylcholine (18:0/20:5, 16:0/22:5n6)*	1201	TRUE	-1.19449	0.16977	0.241937	0.114192	-0.0920987	0.00491806	0.0328625	1.39027e-28	0.0467505	0.00316748	0.000211675	0.192997	0.000898283	3.88918e-27	0.796441
421	Tot-cholesterol	N-acetylvaline	1023	TRUE	6.0152	-0.928147	-0.181921	-0.139351	0.490238	0.000747898	-0.0115796	3.6644e-75	0.0171091	0.374641	0.404085	0.192825	0.846326	0.0924349	0.796441
500	LDL	beta-hydroxyisovalerate	1010	TRUE	3.39281	-0.187927	-0.166997	0.216353	-0.320999	-0.00784016	0.00414265	8.27502e-29	0.483513	0.380616	0.0500732	0.192785	0.0293548	0.516286	0.796441
541	Glucose	2-methylcitrate/homocitrate	994	TRUE	1.24171	0.0195991	0.0161824	0.0763585	-0.0395014	0.00170808	0.00708149	2.75819e-217	0.517512	0.505038	1.99215e-09	0.199925	0.000400323	8.69284e-18	0.796441
474	HDL	sphingomyelin (d18:2/24:1, d18:1/24:2)*	1023	TRUE	1.81788	-0.153577	-0.116029	0.574391	0.197829	0.00551321	-0.033252	3.49847e-37	0.338063	0.173773	1.84615e-21	0.188626	0.000569813	2.37936e-32	0.796441
136	Triglycerides	3-hydroxy-2-ethylpropionate	1201	TRUE	-1.13375	-0.0759046	0.237127	-0.0327037	0.146009	0.00651153	0.0328783	3.32352e-25	0.523098	0.00417585	0.495343	0.187253	1.13554e-05	3.83375e-26	0.796441
443	Triglycerides	glucose	1201	TRUE	-1.55019	0.352462	0.203298	0.407648	-0.259017	0.00675269	0.0305963	3.86516e-33	0.0857272	0.0124629	4.74022e-08	0.18515	1.34916e-06	7.50782e-24	0.796441
423	Glucose	glucose	1098	TRUE	0.954516	-0.075051	0.00875543	0.46228	0.0606324	0.00143657	0.00316799	3.71745e-250	0.111991	0.560066	5.82187e-167	0.183577	4.86466e-06	7.22903e-09	0.796441
284	HDL	sphingomyelin (d18:1/20:0, d16:1/22:0)*	998	TRUE	1.9541	-0.163665	-0.156639	0.400171	0.221706	0.00729063	-0.0353777	3.69693e-38	0.33582	0.0783805	1.22589e-10	0.180619	1.21344e-05	4.23802e-33	0.796441
279	HDL	N-palmitoyl-sphingosine (d18:1/16:0)	1023	TRUE	2.30213	0.22887	-0.187081	0.102472	-0.188877	0.0067177	-0.0352138	3.37727e-55	0.134178	0.0372808	0.0814279	0.179765	7.04066e-05	1.77382e-32	0.796441
301	LDL	ethylmalonate	1023	TRUE	3.49523	-0.325678	-0.16046	0.0758164	-0.141603	-0.00826706	0.00581417	7.73049e-34	0.0465845	0.399077	0.100004	0.191466	0.0206559	0.353284	0.796441
314	LDL	3-methylglutaconate	996	TRUE	3.86009	-0.717556	-0.0180845	-0.346893	0.174601	-0.00632144	0.00617228	2.80679e-41	1.39034e-05	0.925816	3.11989e-09	0.179158	0.075559	0.320794	0.796441
115	HDL	isovalerylglycine	1009	TRUE	2.53891	-0.0979912	-0.187348	-0.173997	0.122902	0.00680807	-0.0339711	3.20535e-75	0.294226	0.0344041	1.6756e-05	0.17782	4.37264e-05	6.27631e-31	0.796441
420	LDL	palmitoyl dihydrosphingomyelin (d18:0/16:0)*	1023	TRUE	1.00158	-0.0204138	0.112735	1.99134	-0.384586	-0.00760406	0.0225088	0.000419449	0.944479	0.491686	2.20206e-73	0.176836	0.0132185	3.58802e-05	0.796441
67	HDL	ribonate	1023	TRUE	2.4736	-0.111314	-0.189004	-0.0944362	0.126682	0.00735186	-0.0350889	4.66987e-73	0.323886	0.0350643	0.0146107	0.203122	1.40289e-05	2.78786e-32	0.799926
470	Glucose	1-palmitoyl-2-oleoyl-GPE (16:0/18:1)	1047	TRUE	1.29158	-0.00487247	0.00760882	0.0301235	-0.0141106	0.00198673	0.00584761	1.63828e-267	0.786017	0.727944	3.42913e-08	0.204503	1.7033e-05	3.48611e-13	0.799926
357	Tot-cholesterol	1-palmitoyl-2-docosahexaenoyl-GPE (16:0/22:6)*	1023	TRUE	5.67096	-0.220234	-0.2327	0.272716	-0.187352	-0.001146	-0.0114444	1.05881e-74	0.296944	0.252751	8.59998e-05	0.218856	0.765372	0.0874725	0.806681
557	Glucose	1-palmitoyl-2-eicosapentaenoyl-GPC (16:0/20:5)*	1098	TRUE	1.29402	-0.0480072	0.0108984	0.00432699	0.0187299	0.00198852	0.00699592	6.2263e-267	0.0383797	0.61726	0.475951	0.218252	1.34111e-05	3.70197e-19	0.806681
242	Triglycerides	sphingomyelin (d18:1/17:0, d17:1/18:0, d19:1/16:0)	1201	TRUE	-1.08478	-0.100572	0.235888	-0.0755828	0.172232	0.0066862	0.0323615	2.81449e-20	0.485322	0.00430435	0.187104	0.216647	5.33518e-06	6.20059e-26	0.806681
505	Tot-cholesterol	ribonate	1023	TRUE	5.99099	-0.73849	-0.182292	-0.144575	0.280326	0.00137773	-0.0113974	3.03892e-82	0.00408738	0.372501	0.100982	0.216621	0.720997	0.0918515	0.806681
88	HDL	1-palmitoyl-2-linoleoyl-GPC (16:0/18:2)	1023	TRUE	1.58391	0.273194	-0.154858	0.677247	-0.243503	0.00840815	-0.0340023	1.46826e-21	0.180348	0.0751263	3.73222e-16	0.217437	3.09387e-07	2.19948e-32	0.806681
515	Triglycerides	1-oleoyl-2-docosahexaenoyl-GPC (18:1/22:6)*	1201	TRUE	-1.38725	0.202101	0.214568	0.198291	-0.12894	0.00556577	0.0358006	1.04764e-31	0.0674881	0.00883128	1.32925e-05	0.214089	9.1756e-05	2.11309e-30	0.806681
548	Tot-cholesterol	1-stearoyl-2-linoleoyl-GPI (18:0/18:2)	1014	TRUE	6.01876	-0.823044	-0.174081	-0.10787	0.395245	0.000512743	-0.0124507	4.98401e-65	0.0113276	0.405082	0.405293	0.212119	0.896125	0.06609	0.806681
215	Triglycerides	sphingomyelin (d18:2/24:1, d18:1/24:2)*	1201	TRUE	-1.00254	0.275203	0.216722	-0.269388	-0.211786	0.00824317	0.0332601	6.21948e-18	0.109978	0.0075814	4.85232e-05	0.208979	1.04211e-08	2.35925e-28	0.806681
434	Glucose	isovalerylcarnitine (C5)	1096	TRUE	1.27663	0.00495267	0.0120529	0.0531426	-0.0254794	0.00191451	0.00590229	3.37077e-277	0.840878	0.573581	8.62376e-08	0.214119	1.89691e-05	6.26419e-14	0.806681
195	LDL	citrate	1023	TRUE	3.74238	-0.81649	-0.13137	-0.22138	0.276208	-0.00697177	0.00620845	3.23114e-36	0.00346358	0.489931	0.051414	0.247882	0.0564714	0.321203	0.807258
386	HDL	1-palmitoyl-2-oleoyl-GPE (16:0/18:1)	981	TRUE	2.40597	0.0935428	-0.169533	-0.0437545	-0.0469164	0.00695588	-0.0333948	7.02517e-69	0.1602	0.0573747	0.0338006	0.250696	5.23113e-05	7.97e-28	0.807258
194	Triglycerides	4-methyl-2-oxopentanoate	1201	TRUE	-1.14925	0.00906815	0.23644	0.00597731	0.0728593	0.00631865	0.0324758	3.90422e-26	0.89038	0.00432521	0.842446	0.251351	1.42313e-05	6.17663e-26	0.807258
222	LDL	1,2-dilinoleoyl-GPC (18:2/18:2)	1023	TRUE	2.24677	-0.237378	-0.107892	0.671226	-0.237016	-0.00369446	0.0180531	1.19963e-12	0.297488	0.557447	7.17257e-17	0.252414	0.289167	0.00364809	0.807258
140	LDL	glycerate	1023	TRUE	3.73814	-0.211604	-0.157179	-0.0868518	-0.332688	-0.00899238	0.00508907	4.39174e-30	0.445131	0.408558	0.469335	0.255749	0.0128728	0.419906	0.807258
14	Glucose	1-palmitoyl-2-adrenoyl-GPC (16:0/22:4)*	1098	TRUE	1.30582	-0.0430762	0.0101176	-0.0109495	0.0181659	0.00208886	0.00701557	6.14666e-276	0.0427438	0.64297	0.166084	0.256433	4.68346e-06	4.5649e-19	0.807258
303	HDL	1-palmitoyl-2-arachidonoyl-GPE (16:0/20:4)*	1023	TRUE	2.42107	0.120877	-0.184291	-0.0113312	-0.0731093	0.00681109	-0.0352325	1.88794e-69	0.176134	0.0406194	0.703656	0.257149	5.45453e-05	2.0648e-32	0.807258
388	Glucose	1-palmitoyl-2-palmitoleoyl-GPC (16:0/16:1)*	1098	TRUE	1.29944	-0.0457662	0.00944915	0.000243572	0.0194627	0.00205093	0.00684876	9.83475e-268	0.0508167	0.664585	0.976054	0.261207	6.50767e-06	3.09772e-18	0.807258
400	Triglycerides	1-palmitoyl-2-linoleoyl-GPC (16:0/18:2)	1201	TRUE	-1.66424	-0.168461	0.259775	0.527044	0.225897	0.00620952	0.0324436	1.35589e-36	0.412794	0.00121186	5.27238e-11	0.262329	6.70229e-06	1.39087e-27	0.807258
159	HDL	mannitol/sorbitol	1023	TRUE	2.38397	0.0560568	-0.184871	-0.00994885	-0.0163394	0.00744189	-0.0350052	4.10444e-70	0.2375	0.0399396	0.0627806	0.263689	1.10116e-05	3.25323e-32	0.807258
297	Triglycerides	palmitoyl dihydrosphingomyelin (d18:0/16:0)*	1201	TRUE	-0.973436	-0.104123	0.216608	-0.194068	0.174253	0.00703363	0.0319549	3.95827e-15	0.515269	0.00856383	0.00303194	0.26477	8.32463e-07	1.42502e-25	0.807258
391	LDL	oleoyl-linoleoyl-glycerol (18:1/18:2) [1]	1022	TRUE	3.57685	-0.701644	-0.160363	0.0430201	0.148407	-0.00802782	0.0040913	1.35469e-35	5.67524e-05	0.398557	0.49574	0.265167	0.0242714	0.52275	0.807258
427	Triglycerides	trimethylamine N-oxide	1201	TRUE	-1.17038	0.121827	0.234027	0.00236294	-0.0334962	0.00653459	0.0328895	2.40783e-27	0.0337827	0.00467277	0.863766	0.265342	5.06039e-06	8.74132e-27	0.807258
370	Glucose	1-palmitoyl-2-linoleoyl-GPC (16:0/18:2)	1098	TRUE	1.31232	-0.0866937	0.0100291	-0.0105067	0.0643658	0.00201161	0.00686753	5.98386e-181	0.12794	0.646154	0.636329	0.246261	1.11667e-05	1.80985e-18	0.807258
574	HDL	galactonate	933	TRUE	2.3842	0.0878773	-0.209246	-0.00249071	-0.0394122	0.00725111	-0.0350491	1.41784e-61	0.184514	0.0275763	0.858275	0.258696	4.5151e-05	5.67381e-28	0.807258
410	Tot-cholesterol	isobutyrylcarnitine (C4)	1019	TRUE	5.93659	-0.602955	-0.168341	-0.0686259	0.147226	0.0015238	-0.0126917	6.2933e-82	0.000376112	0.412566	0.22569	0.245822	0.692734	0.0612195	0.807258
202	Triglycerides	1-margaroyl-2-oleoyl-GPC (17:0/18:1)*	1201	TRUE	-1.34788	-0.080301	0.231821	0.334662	0.135355	0.00325878	0.033804	1.08733e-33	0.517067	0.00373892	2.12901e-10	0.239074	0.0230358	9.11383e-30	0.807258
433	Triglycerides	succinylcarnitine (C4-DC)	1173	TRUE	-1.19594	-0.0810028	0.155836	0.246042	0.139796	0.00458355	0.0287384	2.42686e-29	0.530708	0.067133	7.55179e-06	0.245453	0.00174426	3.28904e-20	0.807258
459	Glucose	1-stearoyl-2-oleoyl-GPC (18:0/18:1)	1098	TRUE	1.29469	-0.0585197	0.00934409	0.00360296	0.0339893	0.00206689	0.00685164	8.30345e-237	0.0663455	0.668487	0.779688	0.22242	5.4879e-06	1.56917e-18	0.807258
253	LDL	choline	1023	TRUE	3.29648	0.0415311	-0.140105	0.320646	-0.574997	-0.00836258	0.00555017	2.18411e-23	0.928193	0.461414	0.108461	0.225316	0.0192095	0.377331	0.807258
145	Glucose	arabonate/xylonate	1097	TRUE	1.27245	-0.0475879	0.0116268	0.0312994	0.0257392	0.00198882	0.00674708	1.12959e-262	0.0516747	0.589688	0.00119366	0.225946	9.82979e-06	2.14794e-18	0.807258
68	LDL	choline phosphate	978	TRUE	3.49684	-0.312153	-0.209357	0.151416	-0.172718	-0.00957993	0.00684257	6.24771e-32	0.0794139	0.296972	0.0167222	0.245541	0.00959822	0.28302	0.807258
246	LDL	N-acetylleucine	1020	TRUE	3.65889	-0.802192	-0.145412	-0.0997397	0.301916	-0.00843133	0.00731924	4.72243e-35	0.00166549	0.443797	0.369682	0.23088	0.0182129	0.249279	0.807258
331	Triglycerides	behenoyl sphingomyelin (d18:1/22:0)*	1172	TRUE	-1.46844	-0.127479	0.241814	0.299398	0.219694	0.0061965	0.0331339	6.29268e-33	0.492378	0.00283652	1.59449e-06	0.233157	9.97718e-06	1.19061e-27	0.807258
225	Tot-cholesterol	isovalerylcarnitine (C5)	1021	TRUE	5.83077	-0.205241	-0.189672	0.100381	-0.209824	0.000488643	-0.013239	3.2765e-79	0.332642	0.354658	0.243266	0.233924	0.899085	0.0552705	0.807258
12	LDL	1-stearoyl-2-arachidonoyl-GPC (18:0/20:4)	1023	TRUE	3.27637	-0.136054	-0.166113	0.288957	-0.315973	-0.00853465	0.00541875	2.24607e-27	0.656556	0.381311	0.00406446	0.228375	0.0166167	0.387166	0.807258
571	Glucose	sphingomyelin (d18:2/24:1, d18:1/24:2)*	1098	TRUE	1.38617	-0.0749852	0.00204455	-0.0825107	0.0490374	0.00218487	0.00660701	1.91882e-266	0.0915512	0.924194	4.39338e-07	0.237068	1.08721e-06	7.00809e-18	0.807258
26	HDL	behenoyl sphingomyelin (d18:1/22:0)*	997	TRUE	2.04458	-0.162756	-0.177916	0.307759	0.225006	0.00797268	-0.0363163	3.8518e-39	0.388395	0.0446092	1.49251e-06	0.237645	2.39289e-06	8.34271e-35	0.807258
6	Tot-cholesterol	succinylcarnitine (C4-DC)	998	TRUE	5.99543	-0.810949	-0.0319008	-0.391372	0.332553	0.00322415	-0.00623651	3.28662e-85	0.0101249	0.881414	0.00143723	0.239341	0.413469	0.373449	0.807258
94	Glucose	galactonate	1003	TRUE	1.33523	-0.0348974	0.0150219	-0.00175034	0.0113023	0.00181243	0.0060845	6.21015e-272	0.0432545	0.520632	0.635848	0.241174	0.000116043	1.41292e-13	0.807258
494	HDL	1,5-anhydroglucitol (1,5-AG)	1021	TRUE	2.40051	0.164035	-0.183047	0.0211098	-0.142208	0.00679887	-0.0356935	6.28515e-62	0.182733	0.0424937	0.666338	0.241595	5.9633e-05	2.94451e-33	0.807258
523	Tot-cholesterol	palmitoyl-linoleoyl-glycerol (16:0/18:2) [1]*	958	TRUE	5.93675	-0.601353	-0.105297	-0.101884	0.145582	-0.000110311	-0.00831896	2.23046e-76	0.000160598	0.62128	0.126391	0.242555	0.977809	0.250274	0.807258
353	Triglycerides	1-stearoyl-2-linoleoyl-GPC (18:0/18:2)*	1201	TRUE	-1.50723	-0.138894	0.240299	0.405832	0.208452	0.00562876	0.0322506	3.69374e-34	0.436616	0.00281014	7.2281e-09	0.234486	5.03532e-05	4.79664e-27	0.807258
273	Tot-cholesterol	valine	1023	TRUE	5.80606	-0.994635	-0.177708	0.150037	0.53317	0.00086941	-0.0150177	8.9237e-55	0.0606586	0.385156	0.549706	0.288295	0.820637	0.034188	0.815635
364	Triglycerides	sphingomyelin (d18:1/21:0, d17:1/22:0, d16:1/23:0)*	1201	TRUE	-1.22073	-0.0769431	0.242107	0.0924026	0.153702	0.00596262	0.0325147	2.07142e-25	0.606433	0.00337591	0.0895763	0.289398	3.38898e-05	3.28208e-26	0.815635
266	LDL	sphingomyelin (d18:2/23:0, d18:1/23:1, d17:1/24:1)*	1023	TRUE	1.3232	-0.123796	0.0527616	1.94412	-0.312367	-0.0100993	0.0180813	3.37256e-06	0.692721	0.752535	4.85665e-61	0.2956	0.00126631	0.0010995	0.815635
214	Tot-cholesterol	1-palmitoyl-2-oleoyl-GPI (16:0/18:1)*	974	TRUE	6.00587	-0.658547	-0.211941	-0.17194	0.200584	6.73577e-05	-0.0078379	4.96998e-75	0.00436719	0.296857	0.0719361	0.295943	0.986332	0.258629	0.815635
348	Tot-cholesterol	leucine	1022	TRUE	5.91413	-0.966547	-0.183595	-0.0017069	0.511255	0.000855711	-0.013208	2.38115e-56	0.0609559	0.370522	0.994412	0.296807	0.823652	0.0583396	0.815635
487	Tot-cholesterol	2-hydroxy-3-methylvalerate	1023	TRUE	5.93999	-0.644175	-0.179364	-0.0426416	0.179668	0.000807824	-0.012293	6.46498e-81	0.00328369	0.381147	0.522029	0.296187	0.83325	0.0728305	0.815635
352	Triglycerides	sphingomyelin (d17:1/16:0, d18:1/15:0, d16:1/17:0)*	1201	TRUE	-1.0931	-0.0764286	0.233132	-0.0703045	0.147964	0.00670413	0.0324184	2.73899e-20	0.605029	0.00485899	0.232553	0.297633	4.78578e-06	6.33393e-26	0.815635
547	Glucose	1-palmitoyl-2-stearoyl-GPC (16:0/18:0)	1098	TRUE	1.32828	-0.0636773	0.0096679	-0.0234804	0.0415896	0.00204077	0.00671039	8.7284e-219	0.113439	0.657231	0.153318	0.287527	7.07251e-06	2.3636e-17	0.815635
245	HDL	1-palmitoyl-2-linoleoyl-GPI (16:0/18:2)	975	TRUE	2.56448	0.148563	-0.175501	-0.166827	-0.1004	0.00617361	-0.033105	7.3773e-69	0.179633	0.0549533	0.000101306	0.296016	0.000398717	7.38083e-27	0.815635
442	HDL	ethylmalonate	1023	TRUE	2.39599	0.0998518	-0.192277	0.010578	-0.054549	0.00694513	-0.0356301	3.55236e-69	0.196913	0.0325932	0.627431	0.287229	3.92735e-05	2.46083e-33	0.815635
504	Glucose	oleoyl-linoleoyl-glycerol (18:1/18:2) [2]	1096	TRUE	1.28457	-0.0043264	0.0064657	0.0256989	-0.0174915	0.00201383	0.00648123	1.5045e-273	0.843074	0.765142	0.000970742	0.297884	8.19566e-06	2.01274e-16	0.815635
22	Glucose	1-margaroyl-2-linoleoyl-GPC (17:0/18:2)*	1098	TRUE	1.3032	0.020837	0.00758563	-0.00561629	-0.0415078	0.00208467	0.0068631	4.292e-221	0.61281	0.728412	0.693783	0.284277	4.71119e-06	1.23431e-17	0.815635
275	HDL	beta-hydroxyisovalerate	1010	TRUE	2.45867	-0.0952381	-0.187845	-0.0398052	0.124888	0.00670836	-0.0354244	2.66743e-65	0.45275	0.0370336	0.445908	0.283972	8.08558e-05	8.29099e-32	0.815635
485	Glucose	choline phosphate	1048	TRUE	1.32756	0.00151243	-0.00797045	-0.0133299	-0.0195497	0.00189553	0.0066411	2.35993e-285	0.944953	0.718433	0.0885035	0.28125	3.39706e-05	8.35705e-18	0.815635
291	Triglycerides	3-methyl-2-oxovalerate	1201	TRUE	-1.14884	0.00752586	0.237721	0.0195203	0.0746973	0.00616291	0.0323756	3.6599e-26	0.913843	0.00410616	0.540362	0.281122	2.43455e-05	8.95266e-26	0.815635
29	Tot-cholesterol	mannitol/sorbitol	1023	TRUE	5.86158	-0.514945	-0.143944	-0.0297413	0.0360655	0.00164759	-0.0106815	2.03295e-81	1.88899e-06	0.482436	0.0145807	0.278653	0.669066	0.113353	0.815635
432	Triglycerides	sphingomyelin (d18:1/24:1, d18:2/24:0)*	1174	TRUE	-1.1223	0.261611	0.228517	-0.0993517	-0.202597	0.00729984	0.0333253	1.28308e-21	0.160491	0.00552657	0.10609	0.277614	6.51294e-07	3.96264e-27	0.815635
359	Tot-cholesterol	sphingomyelin (d18:2/24:1, d18:1/24:2)*	1023	TRUE	3.65092	0.00635864	0.0659821	2.1399	-0.343414	-0.00372567	-0.0039499	3.16598e-34	0.98491	0.712284	3.56559e-64	0.276504	0.266835	0.50238	0.815635
568	Triglycerides	fructose	1201	TRUE	-1.38117	0.211073	0.207814	0.204652	-0.126265	0.00669064	0.0323754	7.39691e-31	0.094107	0.0114075	2.86884e-05	0.274545	2.14865e-06	1.93499e-26	0.815635
380	HDL	1-stearoyl-2-docosahexaenoyl-GPE (18:0/22:6)*	1023	TRUE	2.40508	0.118219	-0.178673	-0.0396719	-0.0645141	0.00733931	-0.0345543	1.25199e-70	0.172107	0.0468792	0.12985	0.272605	1.53152e-05	5.15093e-31	0.815635
401	Glucose	alpha-hydroxyisocaproate	1097	TRUE	1.26762	0.0142355	0.0101668	0.0313103	-0.0322615	0.0020678	0.00671138	1.01062e-243	0.690537	0.639756	0.00723662	0.285275	5.10106e-06	9.61787e-18	0.815635
514	LDL	sphingomyelin (d18:1/18:1, d18:2/18:0)	1023	TRUE	2.47228	-0.175191	-0.0519191	1.54747	-0.293725	-0.0117773	-0.00444019	1.18855e-17	0.600252	0.771249	2.80556e-29	0.354702	0.000453208	0.454591	0.830692
347	Tot-cholesterol	1-margaroyl-2-oleoyl-GPC (17:0/18:1)*	1023	TRUE	4.40675	-0.164306	-0.286386	1.3955	-0.23567	-0.00550902	0.00183405	6.88065e-47	0.560206	0.128926	9.53742e-37	0.352295	0.121761	0.770755	0.830692
208	LDL	1-stearoyl-2-docosapentaenoyl-GPC (18:0/22:5n3)*	1023	TRUE	2.8355	-0.262692	-0.194311	0.714276	-0.186365	-0.0106662	0.00781757	1.57902e-22	0.28271	0.290657	6.72168e-16	0.350776	0.00209079	0.197447	0.830692
383	Glucose	isobutyrylglycine	1088	TRUE	1.25193	0.00106033	0.00695423	0.0453227	-0.0224978	0.00215709	0.00671996	9.82081e-250	0.966255	0.746811	2.39811e-06	0.343925	1.77767e-06	3.38887e-18	0.830692
41	LDL	sphinganine	452	TRUE	3.63756	-0.392537	0.00335037	0.176786	-0.26125	-0.00872652	0.00279658	1.00345e-14	0.206029	0.990733	0.119525	0.346856	0.12014	0.779511	0.830692
452	Tot-cholesterol	sphingomyelin (d18:2/23:0, d18:1/23:1, d17:1/24:1)*	1023	TRUE	2.99462	-0.0570749	0.0755514	2.49574	-0.282475	-0.00175048	0.00332324	8.15577e-26	0.855532	0.651851	3.11878e-99	0.344563	0.576545	0.54881	0.830692
536	Tot-cholesterol	sphingomyelin (d18:1/18:1, d18:2/18:0)	1023	TRUE	4.48521	-0.0775881	-0.0588543	1.9788	-0.303871	-0.00398398	-0.025677	3.68533e-50	0.823732	0.751756	3.19607e-43	0.358126	0.254787	3.31308e-05	0.830692
150	Glucose	ethylmalonate	1097	TRUE	1.28942	-0.00601001	0.00894499	0.00753266	-0.011809	0.00203347	0.00691206	1.66974e-270	0.761216	0.682337	0.187097	0.348602	8.25363e-06	7.66547e-19	0.830692
86	Tot-cholesterol	choline phosphate	978	TRUE	5.7482	-0.264662	-0.205093	0.223664	-0.146314	-0.000972576	-0.0111237	6.79454e-73	0.164713	0.339867	0.000966831	0.358157	0.805947	0.103007	0.830692
98	Tot-cholesterol	sphinganine-1-phosphate	908	TRUE	5.83741	-0.730019	-0.0516806	0.205788	0.264189	-0.000574101	-0.0137964	1.32043e-64	0.0149056	0.813567	0.0800908	0.361541	0.888577	0.0511176	0.830692
92	Glucose	malate	1040	TRUE	1.27422	-0.00291581	0.00851069	0.0293579	-0.0181203	0.00189485	0.00700309	3.92521e-256	0.899678	0.707783	0.000542513	0.358986	5.39571e-05	8.58618e-18	0.830692
129	Triglycerides	lactate	1201	TRUE	-1.27596	-0.0377318	0.221325	0.14004	0.106859	0.00663913	0.0310514	2.34956e-28	0.769329	0.00691812	0.00545694	0.359468	2.51017e-06	6.44809e-24	0.830692
483	Tot-cholesterol	1-stearoyl-2-linoleoyl-GPC (18:0/18:2)*	1023	TRUE	2.63889	-0.0491793	-0.173848	2.52827	-0.323366	0.00675954	-0.0038584	1.70259e-16	0.894478	0.321764	1.12714e-71	0.360789	0.0409372	0.506036	0.830692
217	HDL	palmitoyl-linoleoyl-glycerol (16:0/18:2) [2]*	965	TRUE	2.39897	0.00978146	-0.182134	-0.261972	0.0455494	0.00702284	-0.026323	7.96392e-79	0.876289	0.0338933	1.21825e-24	0.343835	9.38457e-06	1.09195e-19	0.830692
18	Tot-cholesterol	1-palmitoyl-2-oleoyl-GPC (16:0/18:1)	1023	TRUE	4.28925	-0.145424	-0.245925	1.53897	-0.277986	0.00103014	-0.0140816	6.08982e-41	0.664887	0.197383	5.96196e-31	0.362434	0.773402	0.0250794	0.830692
249	HDL	sphingomyelin (d18:2/14:0, d18:1/14:1)*	1013	TRUE	2.08306	0.149681	-0.15632	0.505353	-0.101145	0.00617886	-0.0424299	1.87569e-56	0.238848	0.0696982	2.32188e-26	0.365564	0.000108583	1.52319e-49	0.830692
335	LDL	1-palmitoyl-2-docosahexaenoyl-GPE (16:0/22:6)*	1023	TRUE	3.52154	-0.34996	-0.158316	0.0514161	-0.129093	-0.00835792	0.00642896	8.25011e-34	0.0768381	0.406232	0.429065	0.365763	0.0201743	0.305566	0.830692
323	Glucose	2-hydroxy-3-methylvalerate	1098	TRUE	1.27849	-0.0434894	0.00799029	0.0296313	0.0179924	0.00209497	0.00626415	8.7357e-273	0.0863442	0.709992	7.66232e-05	0.367816	2.87452e-06	9.90151e-16	0.830692
96	Tot-cholesterol	1-oleoyl-2-docosahexaenoyl-GPC (18:1/22:6)*	1023	TRUE	4.89396	-0.220242	-0.201841	0.819979	-0.207794	-0.00320693	0.00239115	1.45512e-51	0.388969	0.309332	5.74002e-15	0.368383	0.392225	0.723358	0.830692
221	Glucose	trimethylamine N-oxide	1098	TRUE	1.2892	-0.0135638	0.0114022	0.00951906	-0.00660518	0.00196328	0.00695833	1.64754e-271	0.383693	0.600906	0.0221443	0.368394	1.81196e-05	3.25194e-19	0.830692
27	HDL	alpha-hydroxyisovalerate	1023	TRUE	2.31755	-0.0510839	-0.197197	0.0897999	0.0701094	0.00743999	-0.0371208	1.45881e-62	0.584846	0.0274329	0.00629686	0.358388	9.82125e-06	9.91722e-36	0.830692
506	Glucose	phosphatidylcholine (18:0/20:5, 16:0/22:5n6)*	1098	TRUE	1.29461	-0.0445364	0.0100711	0.00295676	0.017855	0.00202849	0.00695363	3.34301e-264	0.0857206	0.644394	0.685364	0.341256	8.88923e-06	5.88025e-19	0.830692
300	Tot-cholesterol	phosphatidylcholine (18:0/20:5, 16:0/22:5n6)*	1023	TRUE	5.34282	-0.27196	-0.159265	0.479681	-0.133032	-0.00222422	-0.00751213	5.16062e-69	0.181848	0.421116	6.29104e-16	0.355639	0.550571	0.250461	0.830692
467	Tot-cholesterol	behenoyl sphingomyelin (d18:1/22:0)*	997	TRUE	2.73567	-0.610306	-0.0704785	2.49608	0.344045	0.00919266	-0.0105478	2.25101e-20	0.0874797	0.674269	1.4795e-94	0.340078	0.00406193	0.0589532	0.830692
113	Triglycerides	N-acetylleucine	1201	TRUE	-1.27563	0.19316	0.236127	0.23069	-0.109382	0.00598667	0.0289615	6.69325e-32	0.0958495	0.00339771	7.61907e-07	0.308712	1.60965e-05	5.95289e-21	0.830692
524	LDL	1-stearoyl-2-linoleoyl-GPI (18:0/18:2)	1014	TRUE	3.42109	-0.810929	-0.105727	0.105802	0.299088	-0.0072203	0.00584017	1.95377e-25	0.00722469	0.586155	0.379577	0.309379	0.0477744	0.353398	0.830692
109	Triglycerides	1-stearoyl-2-linoleoyl-GPE (18:0/18:2)*	1200	TRUE	-1.26331	-0.0216296	0.206825	0.450951	0.0469115	0.00455444	0.0215911	7.311e-53	0.711888	0.00100673	2.3974e-102	0.309387	2.65335e-05	1.01483e-19	0.830692
559	Glucose	1-palmitoyl-2-linoleoyl-GPE (16:0/18:2)	1098	TRUE	1.27224	-0.00472038	0.0096215	0.0292547	-0.0153191	0.00206684	0.00657805	8.58008e-267	0.819352	0.654674	3.80196e-05	0.312796	4.11605e-06	2.11341e-17	0.830692
389	Triglycerides	1-stearoyl-2-docosapentaenoyl-GPC (18:0/22:5n6)*	1200	TRUE	-1.29365	-0.00539294	0.184746	0.337838	0.0801333	0.00529603	0.0271264	1.66433e-36	0.950966	0.0172797	6.57999e-25	0.31948	7.70306e-05	1.56478e-20	0.830692
411	Glucose	sphingomyelin (d18:1/24:1, d18:2/24:0)*	1070	TRUE	1.35673	-0.0707259	0.00395554	-0.0547725	0.0454323	0.00219136	0.00659252	2.48167e-253	0.140949	0.855345	0.000433939	0.322517	1.43959e-06	4.02372e-17	0.830692
31	Tot-cholesterol	N-acetylisoleucine	1013	TRUE	6.11907	-0.70918	-0.177467	-0.296306	0.267821	0.000846161	-0.00961177	5.05361e-82	0.00884186	0.38487	0.00855084	0.323385	0.826035	0.161831	0.830692
516	HDL	arabitol/xylitol	1023	TRUE	2.37314	0.147438	-0.192726	0.0510117	-0.10542	0.0067002	-0.0358387	2.31036e-66	0.245183	0.0320148	0.259308	0.323809	9.04885e-05	1.49153e-33	0.830692
79	HDL	1-stearoyl-2-docosapentaenoyl-GPC (18:0/22:5n6)*	1020	TRUE	2.40627	0.115973	-0.183432	0.00752619	-0.0738939	0.00664348	-0.0351761	1.7909e-67	0.225156	0.0423549	0.818331	0.324903	9.3957e-05	9.51656e-32	0.830692
110	Tot-cholesterol	mannose	1023	TRUE	6.10067	-0.710725	-0.1836	-0.377238	0.248199	0.00144662	-0.00570992	1.09743e-84	0.0202794	0.367337	0.0011816	0.324212	0.705239	0.413238	0.830692
475	HDL	1-stearoyl-2-arachidonoyl-GPE (18:0/20:4)	1023	TRUE	2.46593	0.116093	-0.165305	-0.0863032	-0.0708254	0.00697598	-0.0338913	1.22871e-73	0.232036	0.0652979	0.0068162	0.32932	3.34502e-05	6.14226e-30	0.830692
535	Glucose	N-palmitoyl-sphingosine (d18:1/16:0)	1098	TRUE	1.30826	0.0164996	0.00892889	-0.015171	-0.0369939	0.00211187	0.00699927	1.49346e-241	0.688774	0.682179	0.323992	0.330293	3.69007e-06	3.51079e-19	0.830692
336	LDL	glycerophosphoethanolamine	1023	TRUE	3.37794	-0.351434	-0.147479	0.138803	-0.145439	-0.00774051	0.00687971	1.49675e-29	0.0565064	0.438016	0.0331133	0.330748	0.0300615	0.272369	0.830692
462	LDL	1-oleoyl-2-docosahexaenoyl-GPC (18:1/22:6)*	1023	TRUE	3.01316	-0.290012	-0.16406	0.459555	-0.213507	-0.01019	0.0140505	1.30951e-22	0.232709	0.384678	4.17919e-06	0.330932	0.00424241	0.0287052	0.830692
542	Tot-cholesterol	isobutyrylglycine	1016	TRUE	5.92408	-0.600892	-0.171015	-0.0949041	0.191542	0.0013359	-0.0115654	8.15521e-79	0.00407559	0.402416	0.264518	0.331067	0.727148	0.0858423	0.830692
455	Triglycerides	N-acetylisoleucine	1193	TRUE	-1.2841	0.183001	0.236778	0.219827	-0.101563	0.00556956	0.0308185	3.51388e-32	0.0987231	0.00338974	1.09656e-06	0.335609	6.72152e-05	2.05072e-23	0.830692
374	Triglycerides	succinate	1201	TRUE	-1.19579	0.193594	0.232688	0.04125	-0.109496	0.00643551	0.0324507	8.22816e-26	0.137151	0.00485818	0.374453	0.336101	5.93588e-06	1.33161e-25	0.830692
82	HDL	1-palmitoyl-2-docosahexaenoyl-GPE (16:0/22:6)*	1023	TRUE	2.37543	0.1073	-0.198386	0.038819	-0.064731	0.00668424	-0.0354448	3.65298e-67	0.250597	0.0275152	0.206073	0.336826	8.33065e-05	5.54622e-33	0.830692
258	Triglycerides	sphingosine 1-phosphate	1201	TRUE	-1.03262	-0.0779044	0.235333	-0.167346	0.148411	0.00683876	0.0335757	2.27101e-18	0.632735	0.00433114	0.00711289	0.33778	1.48356e-06	1.23976e-27	0.830692
556	LDL	succinylcarnitine (C4-DC)	998	TRUE	3.64741	-0.802987	0.0245515	-0.29676	0.257986	-0.00599327	0.0102244	4.03841e-37	0.00645501	0.90226	0.00971412	0.328845	0.104009	0.118593	0.830692
124	Triglycerides	fumarate	1201	TRUE	-1.12524	-0.0566015	0.238363	-0.0359034	0.123723	0.00653725	0.0326859	1.7959e-22	0.688399	0.00402973	0.515848	0.340103	5.84629e-06	3.96701e-26	0.830692
334	LDL	palmitoyl-linoleoyl-glycerol (16:0/18:2) [1]*	958	TRUE	3.60742	-0.641923	-0.0755713	-0.0567945	0.102256	-0.00842665	0.00798378	1.54054e-33	1.51535e-05	0.703376	0.36018	0.37805	0.0225123	0.236121	0.832438
538	LDL	isovalerylglycine	1009	TRUE	3.70864	-0.6563	-0.149276	-0.143983	0.172298	-0.00808867	0.00620292	1.01032e-35	0.00107743	0.432798	0.0973849	0.379302	0.0238325	0.325753	0.832438
412	Triglycerides	1-stearoyl-2-linoleoyl-GPI (18:0/18:2)	1195	TRUE	-1.52207	0.182244	0.254448	0.264099	-0.101588	0.00790465	0.0328453	8.8356e-35	0.149778	0.00194642	6.08271e-08	0.379125	2.51419e-08	1.26943e-27	0.832438
23	Tot-cholesterol	glucose	1023	TRUE	6.41725	-0.9503	-0.174045	-0.671983	0.490744	0.00168728	-0.00787092	3.28623e-75	0.0995612	0.393016	0.00181739	0.376534	0.659872	0.250259	0.832438
346	Tot-cholesterol	1-palmitoyl-2-eicosapentaenoyl-GPC (16:0/20:5)*	1023	TRUE	5.40901	-0.320042	-0.114715	0.405973	-0.103789	-0.00259881	-0.00651202	1.53334e-71	0.0790548	0.562048	2.92906e-16	0.372099	0.485496	0.319183	0.832438
537	HDL	N-acetylvaline	1023	TRUE	2.64459	-0.11797	-0.162478	-0.380725	0.145914	0.00783344	-0.0322949	2.64828e-77	0.484401	0.0673313	1.4278e-07	0.371135	2.83038e-06	2.58312e-27	0.832438
287	HDL	ribitol	1000	TRUE	2.46772	0.140468	-0.152812	-0.0738664	-0.112891	0.00680521	-0.0346166	2.12313e-69	0.303312	0.0917863	0.164074	0.3758	5.31159e-05	3.81227e-30	0.832438
244	LDL	3-hydroxyisobutyrate	1007	TRUE	3.58149	-0.653455	-0.151849	0.028265	0.10641	-0.00862179	0.00575962	4.68231e-34	0.000255084	0.435749	0.625453	0.381956	0.0179294	0.363746	0.834656
223	Triglycerides	phosphate	1201	TRUE	-1.34409	0.489911	0.236628	0.178419	-0.418774	0.00660489	0.0327016	3.82264e-10	0.306729	0.00421101	0.323209	0.383216	3.7231e-06	1.76801e-26	0.834656
47	LDL	1-stearoyl-2-oleoyl-GPC (18:0/18:1)	1023	TRUE	2.70711	-0.302129	-0.216287	0.778809	-0.182212	-0.00752054	0.00518955	1.23138e-19	0.210071	0.240302	3.33462e-15	0.385628	0.0293048	0.39291	0.836741
463	LDL	sphingomyelin (d17:1/16:0, d18:1/15:0, d16:1/17:0)*	1023	TRUE	1.5964	-0.245034	0.0298992	1.79066	-0.220919	-0.0131184	0.0205958	2.78156e-09	0.373266	0.854996	3.81672e-72	0.387407	1.98776e-05	0.000149633	0.83744
563	HDL	N-acetylleucine	1020	TRUE	2.60115	-0.0713167	-0.188943	-0.274661	0.101096	0.00690836	-0.0328066	7.79567e-79	0.549594	0.0331667	1.23573e-07	0.390455	3.44861e-05	2.08849e-28	0.838752
351	Glucose	ribonate	1097	TRUE	1.27496	-0.043082	0.0114342	0.0497861	0.0223325	0.00177513	0.00636311	6.78811e-276	0.143848	0.591602	3.79957e-07	0.390932	7.18665e-05	1.00899e-16	0.838752
458	Triglycerides	1-palmitoyl-2-docosahexaenoyl-GPC (16:0/22:6)	1201	TRUE	-1.28279	0.158627	0.249909	0.186228	-0.087357	0.00470749	0.0340933	2.53866e-30	0.157211	0.00230795	1.76177e-05	0.397389	0.0013803	1.41801e-28	0.842219
372	Glucose	stearoyl sphingomyelin (d18:1/18:0)	1098	TRUE	1.31431	0.0167517	0.00745149	-0.0220657	-0.0382967	0.00211767	0.00702523	2.57253e-236	0.726134	0.732329	0.208499	0.398406	3.29347e-06	1.76289e-19	0.842219
143	LDL	1-palmitoyl-2-eicosapentaenoyl-GPC (16:0/20:5)*	1023	TRUE	3.30114	-0.396704	-0.112732	0.228115	-0.0941706	-0.00991129	0.00919468	1.9847e-30	0.0222278	0.549533	1.39624e-06	0.394996	0.00521171	0.139638	0.842219
464	LDL	sphinganine-1-phosphate	908	TRUE	3.58234	-0.765754	-0.0604694	0.153916	0.231032	-0.00992677	0.00479878	1.74272e-28	0.00664823	0.769431	0.162742	0.396347	0.0100783	0.471182	0.842219
446	LDL	methylsuccinate	1019	TRUE	3.5323	-0.349624	-0.162093	0.072996	-0.1332	-0.00855164	0.00543279	4.56277e-34	0.0950338	0.391274	0.293433	0.421099	0.0158661	0.381415	0.843627
319	Glucose	sphingomyelin (d17:1/16:0, d18:1/15:0, d16:1/17:0)*	1098	TRUE	1.33246	0.00976214	0.00537083	-0.0329027	-0.0311305	0.00214449	0.00671346	1.10609e-251	0.819112	0.804816	0.0193062	0.435752	2.25651e-06	7.43429e-18	0.843627
520	LDL	isobutyrylglycine	1016	TRUE	3.54485	-0.63475	-0.144545	-0.0116959	0.143273	-0.00753325	0.00606087	1.52293e-33	0.0011299	0.447535	0.882699	0.435258	0.0347399	0.334055	0.843627
167	Triglycerides	sphingomyelin (d18:1/14:0, d16:1/16:0)*	1201	TRUE	-1.2037	-0.0357495	0.243035	0.110589	0.108552	0.00545259	0.0323159	5.06729e-26	0.804995	0.00324712	0.0644876	0.434104	0.000244392	5.44638e-26	0.843627
4	Triglycerides	sphingomyelin (d18:1/20:0, d16:1/22:0)*	1179	TRUE	-1.3475	-0.0615048	0.202115	0.201247	0.132456	0.00584426	0.0333549	2.24521e-29	0.717582	0.0137508	0.00177355	0.433182	3.87983e-05	1.08116e-27	0.843627
453	Triglycerides	mannitol/sorbitol	1201	TRUE	-1.16337	0.0507493	0.23702	-0.00536511	0.0118208	0.00655839	0.0330843	4.08118e-27	0.274134	0.00418223	0.316721	0.4315	4.4884e-06	1.10427e-26	0.843627
288	LDL	phosphatidylcholine (18:0/20:5, 16:0/22:5n6)*	1023	TRUE	3.25299	-0.377494	-0.136016	0.280573	-0.107929	-0.00980961	0.0087697	2.32528e-29	0.0511523	0.469659	6.49879e-07	0.43032	0.00560242	0.158023	0.843627
373	LDL	trimethylamine N-oxide	1023	TRUE	3.53541	-0.441521	-0.15276	0.0287327	-0.0453954	-0.00812766	0.00612889	1.29688e-34	0.000361151	0.423	0.378156	0.429498	0.023805	0.328107	0.843627
168	LDL	phosphate	1023	TRUE	3.64508	-1.21746	-0.147172	-0.0664297	0.715299	-0.00813848	0.00601461	8.31206e-14	0.173051	0.439607	0.865125	0.42718	0.0228993	0.337768	0.843627
73	LDL	lactate	1023	TRUE	3.74292	-0.771953	-0.150297	-0.251824	0.268359	-0.0078964	0.0084568	8.34717e-36	0.0172096	0.429697	0.0606897	0.426829	0.0268552	0.189366	0.843627
285	HDL	1-palmitoyl-2-stearoyl-GPC (16:0/18:0)	1023	TRUE	1.96959	0.149504	-0.187784	0.344052	-0.10983	0.00695365	-0.032525	1.95248e-37	0.295445	0.0337358	1.74017e-08	0.425135	2.75121e-05	4.91328e-28	0.843627
32	Triglycerides	alpha-hydroxyisocaproate	1198	TRUE	-1.19146	-0.0104657	0.246038	0.12537	0.0791856	0.0056557	0.0309693	1.55421e-27	0.920714	0.00266521	0.0047818	0.420312	7.34971e-05	9.10345e-24	0.843627
91	LDL	mannose	1023	TRUE	3.73377	-0.719595	-0.147713	-0.284753	0.186856	-0.00756716	0.0108947	1.4798e-37	0.0116617	0.436356	0.00860412	0.425742	0.0337362	0.093842	0.843627
492	HDL	1-margaroyl-2-linoleoyl-GPC (17:0/18:2)*	1023	TRUE	1.83629	0.149289	-0.172635	0.426641	-0.109559	0.00635475	-0.029713	5.45916e-35	0.302592	0.0473531	7.51996e-16	0.417633	9.98702e-05	7.24132e-24	0.843627
450	HDL	4-methyl-2-oxopentanoate	1023	TRUE	2.30257	0.108242	-0.180027	0.0853621	-0.0585748	0.00674817	-0.0356502	5.8105e-61	0.332482	0.0447539	0.00583937	0.417452	6.0524e-05	1.30532e-33	0.843627
15	LDL	N-acetylisoleucine	1013	TRUE	3.73674	-0.723029	-0.144257	-0.19782	0.203893	-0.00825696	0.00804563	2.50879e-36	0.00412611	0.447914	0.059091	0.419189	0.021219	0.208363	0.843627
339	Glucose	1-palmitoyl-2-linoleoyl-GPI (16:0/18:2)	1040	TRUE	1.30395	-0.0470048	0.0178136	-0.00586292	0.021213	0.00203335	0.00697522	1.89353e-240	0.114529	0.437048	0.612927	0.416959	1.80978e-05	1.37785e-17	0.843627
264	Triglycerides	arabitol/xylitol	1201	TRUE	-1.16743	-0.0330422	0.238927	0.0431761	0.10252	0.00596132	0.0324434	3.32862e-26	0.806023	0.00384121	0.397211	0.414246	5.70326e-05	6.57917e-26	0.843627
100	Triglycerides	2-methylbutyrylcarnitine (C5)	1200	TRUE	-1.12872	-0.00526577	0.231196	0.0695472	0.0775037	0.00551148	0.0308327	1.27732e-25	0.960136	0.00492675	0.0846835	0.411846	0.000155703	6.56689e-23	0.843627
201	Tot-cholesterol	1-palmitoyl-2-arachidonoyl-GPI (16:0/20:4)*	963	TRUE	5.4113	-0.293772	-0.129476	0.324538	-0.144398	0.00325087	-0.0127692	1.4867e-62	0.190035	0.544332	0.00031696	0.410479	0.406241	0.065765	0.843627
292	LDL	sphingomyelin (d18:1/14:0, d16:1/16:0)*	1023	TRUE	1.7586	-0.261767	-0.0228409	1.74793	-0.214927	-0.0111444	0.0103918	6.53106e-11	0.361356	0.889981	1.66364e-66	0.408235	0.000321946	0.0559883	0.843627
72	Triglycerides	1,2-dipalmitoyl-GPC (16:0/16:0)	1201	TRUE	-1.31572	-0.075397	0.247521	0.224157	0.143063	0.00528763	0.0326758	3.55515e-27	0.671769	0.00255148	0.00202484	0.407439	0.000249794	6.85627e-27	0.843627
107	HDL	3-methyl-2-oxobutyrate	1023	TRUE	2.36328	0.109766	-0.188474	0.0495032	-0.0532504	0.00655643	-0.0356955	3.70346e-67	0.296086	0.0358275	0.0780813	0.406247	0.000110546	4.72269e-33	0.843627
177	Glucose	leucine	1097	TRUE	1.17742	0.0292368	0.0140891	0.14218	-0.0509045	0.0021416	0.00576888	1.48158e-167	0.646471	0.509698	2.09806e-07	0.403294	1.58716e-06	3.49795e-13	0.843627
2	Glucose	1-pentadecanoyl-2-linoleoyl-GPC (15:0/18:2)*	1098	TRUE	1.31169	0.00716307	0.00685464	-0.0137459	-0.0273399	0.00208388	0.00686282	5.32236e-248	0.840592	0.753485	0.254533	0.401602	4.54772e-06	2.06421e-18	0.843627
111	LDL	1-oleoyl-2-dihomo-linolenoyl-GPC (18:1/20:3)*	1022	TRUE	3.42508	-0.657639	-0.167519	0.28934	0.137038	-0.00859274	0.000786175	4.86713e-33	0.00185593	0.37411	0.000227026	0.437519	0.0155675	0.900783	0.844207
419	Tot-cholesterol	1,2-dilinoleoyl-GPC (18:2/18:2)	1023	TRUE	3.89534	-0.218866	-0.119097	0.997023	-0.164377	0.00753361	0.00587719	8.46018e-33	0.35263	0.531299	1.28618e-33	0.442346	0.0366659	0.359798	0.84783
153	Glucose	sphingomyelin (d18:1/21:0, d17:1/22:0, d16:1/23:0)*	1098	TRUE	1.3073	0.0095752	0.00920568	-0.00768165	-0.0316643	0.00202454	0.00693702	9.42776e-235	0.823147	0.672785	0.576755	0.442224	8.74379e-06	6.15192e-19	0.84783
527	LDL	1-palmitoyl-2-palmitoleoyl-GPC (16:0/16:1)*	1023	TRUE	3.4651	-0.643844	-0.145199	0.151418	0.0978615	-0.00791616	0.00305529	6.30774e-33	0.000572813	0.443559	0.0182343	0.47441	0.0259524	0.628723	0.855011
430	Tot-cholesterol	3-methyl-2-oxovalerate	1023	TRUE	5.92573	-0.249723	-0.197576	-0.0390924	-0.129926	0.000835092	-0.0116321	1.65934e-77	0.365739	0.334926	0.621462	0.489215	0.828008	0.0847972	0.855011
509	Tot-cholesterol	palmitoyl sphingomyelin (d18:1/16:0)	1023	TRUE	1.50879	-0.0163146	0.194052	3.80974	-0.296332	-0.00251143	0.013155	1.20675e-06	0.969754	0.234957	3.07209e-115	0.488367	0.411151	0.0158724	0.855011
476	Tot-cholesterol	sphingosine	941	TRUE	6.03048	-0.585751	-0.13492	0.0227012	0.141125	-0.000543774	-0.0151276	6.91721e-79	0.00805873	0.520788	0.758982	0.486805	0.891326	0.0291501	0.855011
25	Triglycerides	phosphatidylcholine (16:0/22:5n3, 18:1/20:4)*	1201	TRUE	-1.45293	-0.0251898	0.224031	0.406714	0.099227	0.00416003	0.0336656	6.19709e-37	0.86039	0.00528852	4.35035e-12	0.486183	0.00325332	2.25384e-29	0.855011
503	Glucose	mannose	1097	TRUE	1.2302	-0.00408808	0.0109775	0.135341	-0.0189585	0.00187344	0.00411884	2.72159e-285	0.901463	0.583041	1.33265e-28	0.486091	7.11075e-06	3.29178e-08	0.855011
39	HDL	sphingomyelin (d18:1/20:1, d18:2/20:0)*	1023	TRUE	1.914	-0.0658901	-0.161948	0.520675	0.116274	0.00665037	-0.0363319	2.18373e-38	0.696175	0.0624402	5.50527e-14	0.485213	4.50126e-05	5.92413e-37	0.855011
268	Triglycerides	1-stearoyl-2-docosapentaenoyl-GPC (18:0/22:5n3)*	1201	TRUE	-1.25266	0.0151858	0.222662	0.375209	0.0693488	0.00214205	0.0310425	3.57989e-33	0.883275	0.00443245	1.22127e-19	0.484845	0.128616	1.72179e-26	0.855011
293	HDL	alpha-ketoglutarate	1023	TRUE	2.40547	0.097352	-0.189463	0.0443969	-0.048672	0.00640005	-0.036529	1.70904e-70	0.361501	0.0349772	0.128025	0.480566	0.000211014	2.23001e-33	0.855011
232	Glucose	succinylcarnitine (C4-DC)	1073	TRUE	1.28178	0.00441678	0.00833741	0.0571444	-0.0236667	0.00181791	0.00583501	3.45689e-273	0.905206	0.715541	5.83e-05	0.478511	0.000100609	8.71115e-13	0.855011
114	Tot-cholesterol	oleoyl-linoleoyl-glycerol (18:1/18:2) [2]	1021	TRUE	5.83014	-0.573468	-0.207521	0.17774	0.101656	0.000697382	-0.0169631	1.44753e-79	0.00203204	0.307709	0.00846811	0.475191	0.854926	0.0132346	0.855011
333	Triglycerides	alpha-hydroxyisovalerate	1201	TRUE	-1.23368	0.125828	0.228914	0.105935	-0.0467028	0.00646773	0.0309728	1.72776e-29	0.132005	0.00511617	0.000481752	0.474741	4.20289e-06	5.19558e-24	0.855011
340	HDL	1-stearoyl-2-arachidonoyl-GPC (18:0/20:4)	1023	TRUE	2.2125	-0.0547483	-0.206799	0.195688	0.0879303	0.00681128	-0.0366504	6.258e-55	0.702758	0.0201068	3.33249e-05	0.474693	4.57488e-05	1.04172e-35	0.855011
439	Tot-cholesterol	3-hydroxyisobutyrate	1008	TRUE	5.8626	-0.558462	-0.187969	0.061615	0.0936632	0.000145878	-0.0125368	5.2975e-77	0.00355856	0.368265	0.321014	0.472959	0.970203	0.0651908	0.855011
394	LDL	1-palmitoyl-2-oleoyl-GPC (16:0/18:1)	1023	TRUE	2.67738	-0.293766	-0.183453	0.860141	-0.207942	-0.00792533	0.00504139	9.41077e-18	0.369383	0.323929	3.28943e-11	0.484647	0.0230809	0.410717	0.855011
85	Glucose	3-hydroxyisobutyrate	1080	TRUE	1.30488	-0.0370519	0.0111437	-0.00581596	0.0107299	0.00204087	0.00699974	1.60994e-271	0.0925952	0.614832	0.397301	0.470172	1.01729e-05	5.16601e-19	0.855011
488	Tot-cholesterol	arabonate/xylonate	1023	TRUE	5.91636	-0.585503	-0.18228	-0.0323976	0.143366	0.000841061	-0.0119937	5.37593e-79	0.00719363	0.373265	0.701464	0.449312	0.82689	0.0752896	0.855011
239	Tot-cholesterol	isoleucine	1022	TRUE	6.12489	-0.757472	-0.198112	-0.30061	0.308385	0.00095376	-0.00960223	1.72371e-70	0.0881388	0.333434	0.134	0.451394	0.803796	0.170823	0.855011
89	Glucose	valine	1098	TRUE	1.1665	0.0237084	0.0124021	0.16582	-0.0458947	0.00212132	0.00529582	6.99328e-169	0.712105	0.559253	2.17396e-09	0.452137	1.71658e-06	4.47397e-11	0.855011
55	Triglycerides	1-stearoyl-2-docosahexaenoyl-GPC (18:0/22:6)	1201	TRUE	-1.22858	0.141948	0.232934	0.214717	-0.0673562	0.00377977	0.0328397	1.13781e-29	0.154222	0.00414509	6.85371e-08	0.458075	0.0105741	2.66759e-27	0.855011
144	Tot-cholesterol	beta-hydroxyisovalerate	1010	TRUE	5.67565	-0.234612	-0.20434	0.263818	-0.196066	0.000749125	-0.0141076	2.59023e-67	0.415725	0.31823	0.0262005	0.459226	0.846413	0.0397124	0.855011
7	LDL	1-palmitoyl-2-oleoyl-GPI (16:0/18:1)*	974	TRUE	3.62208	-0.645346	-0.164658	-0.0835767	0.132119	-0.00856466	0.00876507	1.59628e-32	0.00268963	0.383889	0.347257	0.459514	0.0192864	0.174741	0.855011
276	HDL	fructose	1023	TRUE	2.54328	-0.0703707	-0.178538	-0.146409	0.0949748	0.00694495	-0.0350384	1.54979e-70	0.601916	0.0467372	0.00851506	0.457046	3.66019e-05	2.60949e-32	0.855011
199	LDL	pyruvate	1022	TRUE	3.53372	-0.609514	-0.104942	-0.121313	0.0605148	-0.00637426	0.0108966	2.90133e-35	0.000122583	0.585898	0.000577096	0.461068	0.0751346	0.0890858	0.855011
172	HDL	3-methyl-2-oxovalerate	1023	TRUE	2.34995	0.110682	-0.185218	0.0566433	-0.0605476	0.00675892	-0.035853	1.45529e-63	0.361237	0.0395085	0.103317	0.462952	6.20926e-05	1.07978e-33	0.855011
165	Glucose	succinate	1098	TRUE	1.30049	-0.0497168	0.00966305	-0.00354844	0.0316	0.00204596	0.00695655	2.36959e-235	0.211033	0.657688	0.826719	0.464993	7.27157e-06	4.54719e-19	0.855011
482	Glucose	fumarate	1096	TRUE	1.24955	0.00865048	0.0115562	0.073172	-0.0279476	0.00179485	0.00650104	5.99324e-241	0.829672	0.59042	3.79898e-06	0.467136	7.077e-05	3.63369e-17	0.855011
64	Triglycerides	1-stearoyl-2-arachidonoyl-GPC (18:0/20:4)	1201	TRUE	-1.25113	-0.008423	0.21285	0.270148	0.0881363	0.00455782	0.0300419	1.9899e-30	0.946197	0.00884819	2.2043e-08	0.469323	0.0015003	5.10196e-23	0.855011
60	Triglycerides	citrate	1201	TRUE	-1.12623	-0.0205001	0.238217	-0.0493175	0.0936169	0.00669112	0.0328296	2.92916e-23	0.880959	0.00402557	0.3922	0.472848	6.65163e-06	1.38436e-26	0.855011
418	LDL	1-myristoyl-2-palmitoyl-GPC (14:0/16:0)	1023	TRUE	3.13366	-0.410622	-0.136796	0.357438	-0.0943441	-0.00784613	0.00674225	8.71578e-27	0.0200588	0.465258	7.09198e-08	0.490783	0.0255473	0.274921	0.855152
219	Tot-cholesterol	pyruvate	1022	TRUE	5.85484	-0.532133	-0.157582	-0.108576	0.0606986	0.00226332	-0.00779386	6.0583e-81	0.00185582	0.447725	0.0042546	0.492641	0.557542	0.258941	0.855797
570	LDL	glucose	1023	TRUE	4.06295	-0.884425	-0.138402	-0.623035	0.352101	-0.0072464	0.0100664	8.24853e-36	0.0993155	0.465197	0.00187295	0.495116	0.0421588	0.113862	0.857505
343	Triglycerides	sphingosine	1164	TRUE	-1.19131	0.0249624	0.238751	0.0955521	0.049898	0.00650891	0.029669	2.33573e-27	0.788485	0.00470249	0.000454036	0.497735	5.53693e-06	3.35917e-21	0.859453
128	Glucose	sphingosine	1012	TRUE	1.28062	-0.0371992	0.0125166	0.0125832	0.018205	0.00220701	0.00669133	6.6949e-235	0.199101	0.58519	0.194491	0.500179	5.77165e-06	5.41092e-16	0.861087
141	Glucose	1-stearoyl-2-linoleoyl-GPC (18:0/18:2)*	1098	TRUE	1.31886	-0.0552408	0.00954009	-0.0164959	0.0327249	0.00201629	0.00685731	3.14007e-200	0.284667	0.661941	0.378733	0.510225	1.02384e-05	2.0284e-18	0.862213
360	Glucose	1-stearoyl-2-dihomo-linolenoyl-GPC (18:0/20:3n3 or 6)*	1098	TRUE	1.29444	-0.00150187	0.00950067	0.00112518	-0.0180183	0.00204278	0.00701899	6.08959e-263	0.963018	0.663667	0.925531	0.510998	7.30704e-06	5.3881e-18	0.862213
510	Glucose	sphingomyelin (d18:2/14:0, d18:1/14:1)*	1086	TRUE	1.33239	0.00124943	0.0104636	-0.0401211	-0.0199837	0.00189462	0.00758239	2.15772e-293	0.971181	0.624262	0.00172047	0.51133	1.8157e-05	1.57687e-22	0.862213
436	Glucose	1,2-dipalmitoyl-GPC (16:0/16:0)	1098	TRUE	1.3151	-0.0518954	0.00859544	-0.0154748	0.0294433	0.00206123	0.00684682	1.61741e-215	0.267663	0.693726	0.413022	0.508392	6.18648e-06	3.12812e-18	0.862213
329	Tot-cholesterol	2-methylcitrate/homocitrate	922	TRUE	6.33941	-0.597511	0.030191	-0.259889	0.170773	-0.000700528	-0.0161944	9.6204e-78	0.0188244	0.896641	0.0261626	0.50781	0.865281	0.0250625	0.862213
545	Triglycerides	tiglylcarnitine (C5:1-DC)	1196	TRUE	-1.17355	0.148006	0.245988	0.00126916	-0.0707339	0.00650008	0.0331691	3.29075e-26	0.209848	0.00342425	0.977534	0.503018	9.63454e-06	7.18627e-27	0.862213
254	Tot-cholesterol	1-stearoyl-2-docosahexaenoyl-GPE (18:0/22:6)*	1023	TRUE	5.81857	-0.335487	-0.243816	0.223444	-0.0881177	-0.00125357	-0.0150328	2.92292e-80	0.0872672	0.231344	0.000167722	0.508435	0.744448	0.026165	0.862213
206	LDL	arabitol/xylitol	1023	TRUE	3.73315	-0.677096	-0.140834	-0.279252	0.146118	-0.00627249	0.0076282	1.07391e-37	0.0114039	0.457599	0.003418	0.516781	0.0823191	0.223197	0.865698
404	LDL	N-acetylvaline	1023	TRUE	3.57074	-0.740343	-0.15664	0.0412918	0.22679	-0.00837504	0.00534424	1.22174e-31	0.0409661	0.411376	0.790401	0.517347	0.0197085	0.40403	0.865698
396	Triglycerides	1-palmitoyl-2-docosahexaenoyl-GPE (16:0/22:6)*	1201	TRUE	-1.23738	-0.00573383	0.206063	0.384215	0.0416794	0.00177612	0.0300227	1.82376e-37	0.942135	0.00519673	5.34091e-47	0.518287	0.17289	6.74527e-28	0.865698
540	Triglycerides	1-palmitoyl-2-arachidonoyl-GPC (16:0/20:4n6)	1201	TRUE	-1.32087	-0.0146603	0.23833	0.327133	0.0816638	0.00483692	0.0300061	4.66643e-33	0.911352	0.00325169	3.00829e-10	0.519419	0.000631072	2.70672e-23	0.865698
392	Glucose	phosphatidylcholine (16:0/22:5n3, 18:1/20:4)*	1098	TRUE	1.32592	-0.0488586	0.0109013	-0.0248598	0.02469	0.00210525	0.00676558	2.04326e-229	0.267407	0.617726	0.135434	0.531438	3.91124e-06	7.48819e-18	0.88317
573	HDL	malate	968	TRUE	2.47377	-0.0307681	-0.143714	-0.0496997	0.0474469	0.00697143	-0.0362264	5.80416e-70	0.727423	0.125351	0.160331	0.534326	7.25523e-05	3.02488e-31	0.883676
532	HDL	1,2-dilinoleoyl-GPC (18:2/18:2)	1023	TRUE	1.70918	-0.0185426	-0.166121	0.345734	0.0599004	0.00933048	-0.0291283	4.1837e-31	0.86137	0.052601	2.90377e-20	0.534816	9.23595e-09	7.89288e-24	0.883676
216	Tot-cholesterol	1-stearoyl-2-arachidonoyl-GPC (18:0/20:4)	1023	TRUE	5.27799	-0.19519	-0.226456	0.598259	-0.171847	0.000137337	-0.0143719	9.28645e-61	0.547956	0.261013	2.12471e-08	0.537267	0.971043	0.0307491	0.885181
204	Triglycerides	leucine	1201	TRUE	-1.21977	-0.0262509	0.238352	0.299714	0.0993395	0.00443464	0.0283965	1.31161e-27	0.871538	0.00338464	0.000126075	0.542102	0.00223328	1.88369e-19	0.888926
10	Triglycerides	ribitol	1183	TRUE	-1.28167	-0.00758043	0.224413	0.225359	0.083405	0.0063723	0.0286489	1.63257e-30	0.958266	0.00626574	1.5121e-05	0.543475	5.57377e-06	5.01414e-20	0.888926
393	LDL	isobutyrylcarnitine (C4)	1019	TRUE	3.58778	-0.593046	-0.146506	-0.0159576	0.0714573	-0.0076665	0.00534394	1.53227e-35	0.000172264	0.443797	0.762184	0.545226	0.0327788	0.39736	0.888926
381	LDL	sphingosine 1-phosphate	1023	TRUE	3.74129	-0.734951	-0.154373	-0.175168	0.227911	-0.00813656	0.00642399	6.36387e-30	0.0488112	0.417505	0.30797	0.545723	0.0226538	0.306394	0.888926
313	LDL	tricosanoyl sphingomyelin (d18:1/23:0)*	766	TRUE	2.65155	-0.300293	-0.294656	0.604721	-0.164848	-0.00570657	0.010479	2.02032e-15	0.28578	0.158663	1.27913e-12	0.549737	0.149315	0.127284	0.892934
57	Tot-cholesterol	sphinganine	452	TRUE	5.90757	-0.346146	-0.0162268	0.146224	-0.176409	7.66041e-05	-0.0129955	8.79628e-32	0.297936	0.958122	0.229398	0.553236	0.989839	0.224624	0.896086
493	HDL	glycerophosphorylcholine (GPC)	1023	TRUE	2.17777	-0.0529807	-0.181882	0.152381	0.0698772	0.00726283	-0.0334885	8.71788e-47	0.6829	0.0419998	0.00194696	0.556375	1.54458e-05	5.64165e-29	0.897267
472	Tot-cholesterol	palmitoyl-linoleoyl-glycerol (16:0/18:2) [2]*	965	TRUE	5.92972	-0.560818	-0.133045	0.184352	0.0692362	0.000923948	-0.0207848	3.61941e-80	0.000270202	0.527167	0.00324917	0.557086	0.811954	0.00343404	0.897267
469	LDL	arabonate/xylonate	1023	TRUE	3.62188	-0.620796	-0.147194	-0.0586624	0.10237	-0.00791963	0.00627397	3.1362e-35	0.00218106	0.439501	0.455252	0.561321	0.0268393	0.317168	0.901562
52	Glucose	1-stearoyl-2-arachidonoyl-GPI (18:0/20:4)	1096	TRUE	1.28788	-0.0428067	0.00869241	0.0111986	0.0194255	0.00203355	0.006866	7.32928e-237	0.270263	0.691507	0.447996	0.569229	8.3839e-06	1.64844e-18	0.904265
566	Tot-cholesterol	trimethylamine N-oxide	1023	TRUE	5.89933	-0.501128	-0.173637	0.015758	0.0351502	0.000259257	-0.0121341	6.79646e-81	0.000165739	0.396888	0.652979	0.569294	0.946522	0.0716635	0.904265
122	LDL	fructose	1023	TRUE	3.69136	-0.355182	-0.134395	-0.117537	-0.155692	-0.00819649	0.00643833	6.13988e-34	0.214707	0.480537	0.319584	0.565613	0.0216876	0.305506	0.904265
350	HDL	1,2-dipalmitoyl-GPC (16:0/16:0)	1023	TRUE	1.84104	0.1183	-0.161051	0.528881	-0.0904642	0.00612436	-0.0328565	3.3413e-34	0.479224	0.0646204	1.73507e-14	0.566518	0.000182597	5.34502e-30	0.904265
40	Triglycerides	1-palmitoyl-2-adrenoyl-GPC (16:0/22:4)*	1200	TRUE	-1.23367	0.105265	0.229637	0.30799	-0.0334726	0.00464369	0.02703	8.39274e-35	0.135766	0.00265797	1.12535e-28	0.571981	0.000449553	5.37255e-21	0.90603
233	LDL	1-stearoyl-2-docosahexaenoyl-GPE (18:0/22:6)*	1023	TRUE	3.54348	-0.425613	-0.164811	0.0640714	-0.0679547	-0.00862646	0.0055428	5.72637e-35	0.0205171	0.387622	0.248967	0.58603	0.0166105	0.381319	0.91957
567	Triglycerides	beta-hydroxyisovalerate	1189	TRUE	-1.23523	0.136238	0.23295	0.112825	-0.0655518	0.0060714	0.0320318	9.79781e-28	0.284394	0.00467016	0.0234506	0.586417	2.1936e-05	6.73329e-25	0.91957
429	Glucose	1-stearoyl-2-arachidonoyl-GPC (18:0/20:4)	1098	TRUE	1.29679	-0.00199152	0.00942539	4.44476e-05	-0.017667	0.00204399	0.00697444	1.23483e-250	0.9583	0.666729	0.997085	0.588806	7.35578e-06	4.48662e-19	0.91957
441	Triglycerides	1-palmitoyl-2-oleoyl-GPC (16:0/18:1)	1201	TRUE	-1.47942	-0.0218805	0.236729	0.576894	0.0699114	0.00339258	0.0291754	1.239e-42	0.874236	0.00208334	5.51247e-22	0.589848	0.0119294	2.53558e-24	0.91957
361	Glucose	1-stearoyl-2-docosapentaenoyl-GPC (18:0/22:5n6)*	1095	TRUE	1.30094	-0.00998564	0.0107631	-0.00303552	-0.0109637	0.002041	0.00697084	1.16454e-266	0.698204	0.623877	0.723556	0.59023	8.64144e-06	1.0499e-18	0.91957
101	HDL	isobutyrylglycine	1016	TRUE	2.53456	-0.0159043	-0.17431	-0.14622	0.0462209	0.00683047	-0.0347308	3.04069e-75	0.862248	0.0514103	8.73806e-05	0.592416	4.66875e-05	5.38923e-32	0.91957
16	HDL	sphingomyelin (d18:2/23:0, d18:1/23:1, d17:1/24:1)*	1023	TRUE	1.6685	-0.0306801	-0.121321	0.640635	0.0800731	0.00623117	-0.0315838	3.61744e-31	0.846121	0.150801	5.11787e-27	0.595204	8.10516e-05	1.35087e-29	0.91957
62	Glucose	1,2-dilinoleoyl-GPC (18:2/18:2)	1098	TRUE	1.31788	-0.0370573	0.00888833	-0.0108937	0.0147172	0.00199017	0.00675085	9.35823e-223	0.218709	0.683842	0.290582	0.596592	1.48497e-05	3.01434e-17	0.91957
447	HDL	2-methylcitrate/homocitrate	922	TRUE	2.4967	-0.0285838	-0.100042	-0.0966047	0.0594411	0.0074312	-0.0363998	9.20539e-64	0.796659	0.323575	0.0581727	0.597117	3.68905e-05	7.6216e-31	0.91957
151	Tot-cholesterol	sphingomyelin (d18:1/20:0, d16:1/22:0)*	998	TRUE	2.85024	-0.0956784	-0.150556	2.51477	-0.164064	0.0038942	-0.00621176	1.69878e-23	0.765374	0.369601	3.0534e-102	0.599232	0.215169	0.264331	0.91957
190	LDL	sphingomyelin (d18:1/17:0, d17:1/18:0, d19:1/16:0)	1023	TRUE	1.88168	-0.300711	0.0282733	1.665	-0.140128	-0.0142646	0.0174385	5.81196e-12	0.289513	0.86621	5.38733e-59	0.600014	6.39146e-06	0.00169013	0.91957
426	HDL	phosphatidylcholine (18:0/20:5, 16:0/22:5n6)*	1023	TRUE	2.20995	0.0671174	-0.180912	0.176991	-0.0333722	0.00581288	-0.0339406	3.19102e-60	0.457695	0.0394217	1.78345e-11	0.601474	0.000438375	1.23971e-31	0.91957
324	LDL	1-margaroyl-2-oleoyl-GPC (17:0/18:1)*	1023	TRUE	2.63295	-0.362024	-0.212574	0.886553	-0.128829	-0.0120769	0.0149144	1.14155e-18	0.187659	0.2473	1.46803e-16	0.601696	0.000497913	0.0150014	0.91957
212	Tot-cholesterol	citrate	1023	TRUE	5.99652	-0.580217	-0.173537	-0.151689	0.133697	0.00165453	-0.012022	4.81433e-78	0.0536695	0.39684	0.216038	0.603489	0.674077	0.0743014	0.91957
164	LDL	1-pentadecanoyl-2-linoleoyl-GPC (15:0/18:2)*	1023	TRUE	2.39468	-0.663373	-0.0497082	1.02244	0.121745	-0.0096087	0.0136375	7.77423e-17	0.0108916	0.779732	3.451e-29	0.604518	0.0039268	0.020442	0.91957
440	Tot-cholesterol	1-myristoyl-2-linoleoyl-GPC (14:0/18:2)*	1023	TRUE	4.5555	-0.336901	-0.126377	1.11472	-0.102001	0.00439647	-0.0156153	8.19913e-52	0.143671	0.500174	6.96944e-38	0.610933	0.212419	0.0115008	0.926877
231	LDL	2-methylbutyrylcarnitine (C5)	1018	TRUE	3.55471	-0.408907	-0.186694	0.0865263	-0.0931099	-0.00858067	0.00441539	8.08077e-35	0.0740111	0.337683	0.320832	0.630386	0.018796	0.498148	0.927291
149	HDL	glucose	1023	TRUE	2.56866	-0.0955297	-0.188216	-0.20098	0.116453	0.00719195	-0.0343395	1.96654e-62	0.706993	0.0359872	0.034168	0.633783	2.06089e-05	4.78398e-30	0.927291
251	HDL	tiglylcarnitine (C5:1-DC)	1016	TRUE	2.39342	-0.0300082	-0.194481	0.00118873	0.0548794	0.00712538	-0.0354299	1.42459e-66	0.817279	0.0310748	0.978668	0.633108	3.13997e-05	1.05014e-32	0.927291
422	Glucose	1-stearoyl-2-docosahexaenoyl-GPC (18:0/22:6)	1098	TRUE	1.29571	-0.00794276	0.00888111	-0.000576124	-0.0118247	0.00208002	0.00695717	1.59953e-259	0.793903	0.684437	0.954395	0.632482	6.36137e-06	6.23288e-19	0.927291
104	Glucose	sphingomyelin (d18:2/23:0, d18:1/23:1, d17:1/24:1)*	1098	TRUE	1.35155	-0.00186774	0.00481416	-0.0463941	-0.0210966	0.00207439	0.00669087	6.4992e-242	0.967725	0.824314	0.00434609	0.632132	4.3047e-06	7.40416e-18	0.927291
277	Glucose	1-myristoyl-2-linoleoyl-GPC (14:0/18:2)*	1098	TRUE	1.28796	-0.0351332	0.00985297	0.00803947	0.012554	0.00208318	0.00689318	2.16843e-241	0.231288	0.651628	0.461224	0.627596	5.02601e-06	1.03304e-18	0.927291
78	Triglycerides	1-stearoyl-2-arachidonoyl-GPI (18:0/20:4)	1200	TRUE	-1.46344	0.00501719	0.176266	0.552343	0.0604196	0.00416671	0.0283165	1.03143e-42	0.968713	0.0217268	2.73869e-23	0.625822	0.00181317	5.96587e-23	0.927291
468	Tot-cholesterol	alpha-hydroxyisovalerate	1023	TRUE	5.7644	-0.532532	-0.193509	0.118808	0.0877639	0.00144144	-0.0140138	8.9043e-74	0.0126993	0.343706	0.11359	0.614905	0.707779	0.0392716	0.927291
9	Triglycerides	sphingomyelin (d18:1/18:1, d18:2/18:0)	1201	TRUE	-1.12419	-0.00591036	0.240139	-0.0522997	0.0772411	0.00662559	0.0330767	6.64669e-22	0.971385	0.00368614	0.443933	0.622796	5.32488e-06	5.23343e-26	0.927291
59	HDL	3-methylglutaconate	996	TRUE	2.43452	0.0615464	-0.187422	-0.0795358	-0.0307771	0.00766117	-0.0348833	2.56413e-70	0.436264	0.0438397	0.00454458	0.620873	6.84159e-06	1.00287e-31	0.927291
512	LDL	stearoyl sphingomyelin (d18:1/18:0)	1023	TRUE	1.84643	-0.275369	-0.028529	1.93171	-0.157015	-0.0119015	0.00302916	5.56173e-11	0.408884	0.866285	9.42774e-53	0.620582	0.000187148	0.58723	0.927291
3	Triglycerides	1-palmitoyl-2-stearoyl-GPC (16:0/18:0)	1201	TRUE	-1.45306	0.00802198	0.23088	0.360887	0.0675667	0.00479358	0.0333705	6.89581e-35	0.954586	0.00394414	2.66476e-09	0.61619	0.00059454	4.50756e-29	0.927291
50	Glucose	arabitol/xylitol	1097	TRUE	1.28983	-0.0380438	0.00954229	0.0179132	0.0143119	0.00190554	0.00681558	6.63754e-264	0.258227	0.66125	0.143613	0.61517	3.5799e-05	2.53997e-18	0.927291
105	HDL	1-stearoyl-2-linoleoyl-GPI (18:0/18:2)	1014	TRUE	2.79516	-0.0322055	-0.234679	-0.290014	0.0670663	0.00539946	-0.0357987	1.05453e-74	0.818794	0.00945928	2.31451e-07	0.624499	0.00147982	2.5668e-34	0.927291
278	Tot-cholesterol	fumarate	1022	TRUE	6.06717	-0.594173	-0.186077	-0.267236	0.157796	0.00175229	-0.010958	9.00229e-78	0.0862686	0.362816	0.0565842	0.636015	0.651523	0.105459	0.927469
162	Glucose	tricosanoyl sphingomyelin (d18:1/23:0)*	823	TRUE	1.2781	0.000148378	0.0309247	0.00620909	-0.0182132	0.00220333	0.00696442	4.3358e-178	0.996965	0.228672	0.588789	0.638428	3.9876e-05	2.37854e-14	0.927469
424	Triglycerides	isovalerylglycine	1200	TRUE	-1.21369	0.111274	0.236423	0.0542179	-0.0354576	0.00654414	0.0324454	2.21506e-28	0.201547	0.0041003	0.106692	0.638744	3.81679e-06	1.33378e-25	0.927469
209	Glucose	3-methyl-2-oxobutyrate	1098	TRUE	1.29006	-0.034596	0.0122762	0.0171409	0.00753219	0.00186723	0.00671088	1.85054e-273	0.201311	0.571823	0.01721	0.649129	4.40124e-05	6.37322e-18	0.930984
257	LDL	galactonate	933	TRUE	3.46819	-0.570915	-0.13954	-0.0283124	0.0328144	-0.00734953	0.00994533	2.35144e-31	3.05586e-05	0.47735	0.326266	0.64926	0.0455399	0.132426	0.930984
522	HDL	isobutyrylcarnitine (C4)	1019	TRUE	2.4318	-0.00197269	-0.18082	-0.0615902	0.0251844	0.00746374	-0.035065	7.64495e-73	0.978662	0.0430676	0.0124204	0.648143	8.64653e-06	1.38715e-32	0.930984
415	LDL	3-methyl-2-oxovalerate	1023	TRUE	3.71617	-0.393765	-0.174934	-0.138348	-0.0798079	-0.00774365	0.00703826	2.41434e-36	0.124442	0.357687	0.0598429	0.647221	0.0299885	0.261275	0.930984
375	Glucose	sphingomyelin (d18:1/20:0, d16:1/22:0)*	1074	TRUE	1.32392	-0.00223798	0.0127799	-0.0252084	-0.0218736	0.00201185	0.00705725	6.97241e-221	0.963457	0.563744	0.131458	0.64737	1.38355e-05	9.39149e-19	0.930984
481	Tot-cholesterol	sphingomyelin (d17:1/16:0, d18:1/15:0, d16:1/17:0)*	1023	TRUE	3.5139	-0.268114	0.0323302	2.14932	-0.116806	-0.00529435	0.00539349	1.42733e-37	0.340077	0.846576	4.43352e-99	0.6545	0.0917522	0.330835	0.936162
187	Glucose	glycerophosphoethanolamine	1097	TRUE	1.34051	-0.0303214	0.00777958	-0.0287591	0.00830498	0.00194039	0.00676131	4.16024e-273	0.191974	0.720137	0.000441602	0.662662	1.86711e-05	2.89395e-18	0.945485
28	Glucose	1,5-anhydroglucitol (1,5-AG)	1096	TRUE	1.36549	-0.0360415	0.00925153	-0.059433	0.0136096	0.00182922	0.00709958	1.21042e-278	0.260809	0.665513	2.5332e-06	0.666648	4.45131e-05	1.48193e-20	0.948819
54	LDL	1-palmitoyl-2-oleoyl-GPE (16:0/18:1)	981	TRUE	3.56174	-0.540481	-0.122592	-0.071763	0.0371487	-0.00711287	0.00708448	4.80018e-34	0.000143887	0.519712	0.102936	0.670049	0.052653	0.277213	0.950831
265	Glucose	1-palmitoyl-2-docosahexaenoyl-GPC (16:0/22:6)	1098	TRUE	1.30148	-0.00806824	0.00835375	-0.00520482	-0.0118146	0.00210901	0.00686452	1.24378e-246	0.807736	0.702233	0.648443	0.671741	4.48218e-06	4.77296e-18	0.950831
36	Glucose	citrate	1098	TRUE	1.30955	-0.00712629	0.0108676	-0.0247767	-0.012669	0.00228528	0.00694623	1.71737e-263	0.83872	0.618106	0.0813931	0.673023	9.15082e-07	4.10119e-19	0.950831
299	Glucose	methylsuccinate	1095	TRUE	1.28086	-0.0130406	0.00563218	0.0197027	-0.00789986	0.00195895	0.00693798	6.91095e-262	0.617176	0.796153	0.0216031	0.698284	1.74299e-05	4.49921e-19	0.951921
53	Triglycerides	1-palmitoyl-2-arachidonoyl-GPI (16:0/20:4)*	1168	TRUE	-1.28084	0.087918	0.286678	0.41718	-0.028435	0.00385992	0.026289	1.99275e-35	0.300131	0.000256931	1.68218e-32	0.699929	0.00382128	1.13336e-19	0.951921
93	LDL	oleoyl-linoleoyl-glycerol (18:1/18:2) [2]	1021	TRUE	3.50283	-0.592926	-0.170642	0.176712	0.0508794	-0.00812258	0.0016551	3.07618e-34	0.000603274	0.367143	0.00488477	0.700784	0.0220562	0.794961	0.951921
87	Triglycerides	isoleucine	1201	TRUE	-1.20384	0.0155938	0.238438	0.350498	0.0556774	0.00388214	0.0271051	1.68103e-28	0.916196	0.00308365	8.6573e-07	0.706284	0.00713753	5.4828e-18	0.951921
66	LDL	fumarate	1022	TRUE	3.78603	-0.632563	-0.150378	-0.331029	0.117423	-0.00677122	0.00761378	4.32327e-36	0.0492636	0.428405	0.0110163	0.704525	0.0602193	0.225854	0.951921
171	LDL	1-palmitoyl-2-adrenoyl-GPC (16:0/22:4)*	1022	TRUE	3.35005	-0.562602	-0.187444	0.311931	0.0473899	-0.00790314	0.000230237	1.13009e-31	0.000789164	0.3167	3.5137e-07	0.705515	0.0257954	0.970534	0.951921
123	LDL	N-palmitoyl-sphingosine (d18:1/16:0)	1023	TRUE	2.00978	-0.350864	-0.116559	1.66542	-0.099874	-0.0124731	0.00764541	4.42368e-13	0.223528	0.491551	6.1497e-51	0.706905	9.14229e-05	0.172039	0.951921
437	Triglycerides	oleoyl-linoleoyl-glycerol (18:1/18:2) [1]	1200	TRUE	-1.24922	-0.000125449	0.173452	0.56118	0.0166754	0.00390276	0.0175821	6.62989e-62	0.998194	0.00243072	4.66255e-164	0.702858	7.48362e-05	6.77331e-16	0.951921
428	Glucose	1-palmitoyl-2-oleoyl-GPI (16:0/18:1)*	1041	TRUE	1.29091	-0.0335881	0.0227847	0.0144796	0.00899301	0.00190383	0.00693801	5.75627e-243	0.218468	0.314243	0.197995	0.692966	4.89176e-05	7.81991e-18	0.951921
460	HDL	1-palmitoyl-2-eicosapentaenoyl-GPC (16:0/20:5)*	1023	TRUE	2.20915	0.042063	-0.159449	0.172388	-0.0200009	0.00545327	-0.0332358	5.81818e-62	0.599664	0.0668544	2.89718e-15	0.695699	0.000875128	6.56765e-31	0.951921
478	Glucose	choline	1098	TRUE	1.34348	-0.0447761	0.00882233	-0.0539105	0.0237186	0.00208006	0.00708744	3.16382e-228	0.439282	0.685485	0.0240008	0.690381	4.58701e-06	1.026e-19	0.951921
260	Glucose	N-acetylisoleucine	1085	TRUE	1.27057	-0.0060083	0.0112474	0.0571245	-0.0124198	0.00187513	0.00619413	3.20285e-261	0.847003	0.595563	5.73827e-06	0.689143	2.62166e-05	7.13122e-16	0.951921
71	Glucose	2-methylbutyrylcarnitine (C5)	1093	TRUE	1.29499	-0.00985281	0.00551603	0.0544047	-0.00961902	0.00161949	0.005782	5.88788e-284	0.728128	0.800115	2.82988e-07	0.688105	0.000367972	3.22035e-13	0.951921
354	Triglycerides	2-hydroxy-3-methylvalerate	1200	TRUE	-1.2087	0.102965	0.229431	0.128431	-0.027385	0.00602035	0.0303056	1.26169e-29	0.207703	0.00462979	9.43263e-06	0.68528	1.56767e-05	2.763e-23	0.951921
84	Glucose	N-acetylleucine	1095	TRUE	1.254	-0.00902244	0.0102117	0.0597264	-0.0127006	0.00210922	0.0062681	5.46237e-249	0.775494	0.634783	9.80423e-06	0.685121	2.77182e-06	1.1169e-15	0.951921
302	HDL	alpha-hydroxyisocaproate	1022	TRUE	2.33943	0.0775415	-0.189625	0.0667654	-0.0461555	0.00702882	-0.0359585	1.43978e-60	0.567913	0.0349557	0.135692	0.683788	3.16013e-05	1.78211e-33	0.951921
377	Glucose	sphingomyelin (d18:1/18:1, d18:2/18:0)	1098	TRUE	1.34054	-0.0406312	0.0071808	-0.0588557	0.0174307	0.0021747	0.00732952	5.76853e-261	0.364316	0.740132	0.00117444	0.680445	1.58316e-06	6.71001e-21	0.951921
552	Tot-cholesterol	3-methyl-2-oxobutyrate	1023	TRUE	5.88305	-0.345329	-0.185806	0.00812472	-0.0603997	0.000695817	-0.0121587	1.61846e-79	0.149834	0.364706	0.899171	0.679835	0.857343	0.0738887	0.951921
183	Tot-cholesterol	1-palmitoyl-2-arachidonoyl-GPE (16:0/20:4)*	1023	TRUE	5.8208	-0.359557	-0.196216	0.0716119	-0.0609394	0.000668576	-0.0125755	3.36318e-77	0.0772636	0.338478	0.291212	0.678343	0.861909	0.0631741	0.951921
445	Tot-cholesterol	galactonate	933	TRUE	5.71046	-0.487261	-0.188757	-0.0285016	0.030871	0.0021641	-0.00686127	4.357e-71	0.000943623	0.371625	0.358692	0.690886	0.58413	0.334539	0.951921
311	Tot-cholesterol	sphingomyelin (d18:1/14:0, d16:1/16:0)*	1023	TRUE	3.59715	-0.314861	-0.026517	2.20433	-0.0871452	-0.00300871	-0.00681357	6.46091e-41	0.270826	0.872104	5.90365e-106	0.736617	0.330211	0.208993	0.954096
196	Tot-cholesterol	1-margaroyl-2-linoleoyl-GPC (17:0/18:2)*	1023	TRUE	3.74655	-0.502439	-0.0980684	1.59494	0.0960616	-0.00159981	0.0103417	1.17255e-32	0.100979	0.594373	4.11466e-46	0.736899	0.643303	0.0973775	0.954096
544	Triglycerides	sphingomyelin (d18:2/14:0, d18:1/14:1)*	1192	TRUE	-1.13229	0.0304069	0.246589	0.00828516	0.039746	0.00609074	0.0321472	2.18418e-24	0.810897	0.00331363	0.878848	0.737678	4.00799e-05	2.36157e-23	0.954096
448	LDL	alpha-hydroxyisovalerate	1023	TRUE	3.57892	-0.450042	-0.149975	-0.0078786	-0.0543895	-0.00819194	0.0064846	1.01071e-33	0.0238371	0.431009	0.9104	0.737981	0.0222826	0.306133	0.954096
305	Triglycerides	valine	1201	TRUE	-1.34484	0.00579055	0.237921	0.477881	0.0659497	0.00434589	0.0263922	2.56069e-29	0.977364	0.00326497	1.20168e-06	0.745019	0.00233151	1.24019e-16	0.954096
155	Tot-cholesterol	ribitol	1000	TRUE	6.21854	-0.545876	-0.0783642	-0.491932	0.0947004	0.0010038	-0.005857	2.12713e-84	0.0792694	0.704455	4.79628e-05	0.744475	0.793663	0.397045	0.954096
118	Tot-cholesterol	tiglylcarnitine (C5:1-DC)	1016	TRUE	5.80727	-0.520879	-0.19252	0.12152	0.0849607	1.22873e-05	-0.0119768	1.19679e-75	0.0775947	0.347603	0.229084	0.745024	0.997479	0.0764133	0.954096
365	Glucose	beta-hydroxyisovalerate	1086	TRUE	1.25797	-0.0322872	0.00841534	0.053876	0.0101859	0.0019966	0.00644159	4.12158e-242	0.342359	0.696427	4.81736e-05	0.74493	1.07001e-05	1.96063e-16	0.954096
262	Tot-cholesterol	1-palmitoyl-2-oleoyl-GPE (16:0/18:1)	981	TRUE	5.87047	-0.460716	-0.199324	0.0329452	0.0316106	0.00160859	-0.0154185	2.22631e-77	0.002621	0.331018	0.486959	0.736354	0.683996	0.0280688	0.954096
174	Glucose	palmitoyl sphingomyelin (d18:1/16:0)	1098	TRUE	1.4179	-0.0456044	-0.000405612	-0.104314	0.02108	0.00212904	0.00624469	1.95471e-217	0.481366	0.985023	1.14681e-05	0.743058	2.12972e-06	1.30455e-15	0.954096
184	Tot-cholesterol	1-pentadecanoyl-2-linoleoyl-GPC (15:0/18:2)*	1023	TRUE	4.33947	-0.550045	-0.0580154	1.33858	0.082313	-0.00111867	-0.00228944	4.45275e-48	0.0416786	0.752918	8.99102e-46	0.735472	0.746038	0.707348	0.954096
425	LDL	1-myristoyl-2-linoleoyl-GPC (14:0/18:2)*	1023	TRUE	2.74507	-0.597771	-0.109108	0.699605	0.0715836	-0.00584756	0.00368722	8.14031e-21	0.00781569	0.550553	1.42551e-16	0.714383	0.0889912	0.540609	0.954096
126	LDL	2-methylcitrate/homocitrate	922	TRUE	3.92237	-0.589051	0.0306399	-0.213887	0.0816617	-0.0095384	0.00411019	1.50282e-35	0.0125916	0.887033	0.0487462	0.732954	0.0128261	0.540092	0.954096
191	Tot-cholesterol	1-palmitoyl-2-adrenoyl-GPC (16:0/22:4)*	1022	TRUE	5.54415	-0.374234	-0.238658	0.510719	-0.0451409	0.00046283	-0.0210415	7.9513e-76	0.0337016	0.225486	2.04694e-15	0.732121	0.901204	0.00132496	0.954096
61	Triglycerides	1-palmitoyl-2-oleoyl-GPI (16:0/18:1)*	1155	TRUE	-1.33958	0.0804041	0.267264	0.239254	-0.0271025	0.00690104	0.0286099	6.41463e-34	0.412223	0.0012623	3.78174e-11	0.7297	6.36296e-07	3.91643e-21	0.954096
45	HDL	1-stearoyl-2-linoleoyl-GPC (18:0/18:2)*	1023	TRUE	1.71822	0.10306	-0.189188	0.539577	-0.062485	0.00817954	-0.0338447	3.2167e-27	0.575626	0.0298224	1.63411e-14	0.72213	6.23524e-07	7.03828e-32	0.954096
534	Triglycerides	1-palmitoyl-2-linoleoyl-GPI (16:0/18:2)	1160	TRUE	-1.46415	0.0960228	0.283736	0.341918	-0.0314588	0.00801085	0.026847	8.55699e-42	0.352636	0.000298457	4.66368e-21	0.720678	3.95065e-09	1.04622e-19	0.954096
356	HDL	1-stearoyl-2-arachidonoyl-GPI (18:0/20:4)	1022	TRUE	2.56362	0.0808728	-0.179198	-0.166974	-0.0460222	0.00704082	-0.0348457	1.67519e-69	0.57629	0.0455884	0.00337162	0.7173	2.82602e-05	5.03448e-32	0.954096
137	Tot-cholesterol	1-oleoyl-2-dihomo-linolenoyl-GPC (18:1/20:3)*	1022	TRUE	5.62664	-0.499987	-0.216643	0.477045	0.0685444	-0.000218518	-0.0198975	3.34995e-76	0.0262676	0.280328	1.19136e-08	0.715385	0.953921	0.00303429	0.954096
405	Tot-cholesterol	arabitol/xylitol	1023	TRUE	6.00712	-0.535017	-0.179343	-0.212793	0.0891666	0.00218003	-0.0108818	7.02399e-82	0.0635287	0.379983	0.0384429	0.713476	0.575167	0.106771	0.954096
70	Triglycerides	isovalerylcarnitine (C5)	1201	TRUE	-1.15234	0.0432326	0.23432	0.0566616	0.0307078	0.00584023	0.031641	1.87204e-26	0.634276	0.00451063	0.136302	0.710773	5.65061e-05	2.77434e-24	0.954096
112	Tot-cholesterol	1-palmitoyl-2-linoleoyl-GPI (16:0/18:2)	975	TRUE	5.58417	-0.363371	-0.169417	0.252842	-0.0730858	0.0024694	-0.0147447	4.46522e-65	0.143129	0.408514	0.00856296	0.734318	0.527458	0.0330009	0.954096
119	Glucose	behenoyl sphingomyelin (d18:1/22:0)*	1067	TRUE	1.30174	-0.0370653	0.00837475	-0.00648353	0.0154136	0.00213241	0.00683274	9.28759e-206	0.437865	0.702062	0.701026	0.748672	4.47613e-06	6.23524e-18	0.956637
368	Triglycerides	tricosanoyl sphingomyelin (d18:1/23:0)*	949	TRUE	-1.15518	0.0211418	0.220504	0.0194449	0.0360567	0.00466661	0.0351198	5.99046e-20	0.858079	0.0176624	0.611255	0.751367	0.00233744	6.87495e-25	0.957951
414	Triglycerides	1-palmitoyl-2-palmitoleoyl-GPC (16:0/16:1)*	1201	TRUE	-1.19008	0.0165803	0.257916	0.30263	0.0192894	0.00407911	0.0262433	2.68795e-32	0.835281	0.000803554	8.41838e-25	0.754741	0.00228617	1.26508e-19	0.960124
498	HDL	sphingomyelin (d18:1/17:0, d17:1/18:0, d19:1/16:0)	1023	TRUE	2.02819	0.00523102	-0.148796	0.379158	0.0369566	0.00546177	-0.0330165	7.75064e-46	0.971849	0.089477	1.61903e-12	0.791103	0.000934384	4.91307e-30	0.961701
179	LDL	glycerophosphorylcholine (GPC)	1023	TRUE	2.65704	-0.470464	-0.105458	0.613404	-0.0661008	-0.00664514	0.013704	4.95612e-17	0.0825317	0.572539	2.38541e-09	0.789991	0.0583925	0.028674	0.961701
289	LDL	sphingosine	941	TRUE	3.68915	-0.465791	-0.0789026	0.108535	-0.0511238	-0.0102602	0.00259092	1.21821e-34	0.0245493	0.688616	0.117495	0.788063	0.00594123	0.690113	0.961701
490	LDL	ribonate	1023	TRUE	3.62343	-0.575892	-0.147249	-0.0823366	0.0571842	-0.00767583	0.00666649	9.78701e-36	0.0161791	0.439112	0.315776	0.786622	0.0326178	0.289655	0.961701
518	Tot-cholesterol	1-stearoyl-2-docosapentaenoyl-GPC (18:0/22:5n6)*	1020	TRUE	5.46135	-0.355779	-0.270061	0.428676	-0.0456041	0.00207187	-0.0182836	1.22545e-69	0.0956456	0.180815	4.58978e-09	0.785575	0.585429	0.00634773	0.961701
259	Glucose	mannitol/sorbitol	1098	TRUE	1.3045	-0.0182046	0.00598595	0.00469672	-0.00106351	0.00190282	0.0066324	1.54056e-285	0.149703	0.782847	0.000868068	0.781948	2.8207e-05	1.50052e-17	0.961701
280	Triglycerides	1,2-dilinoleoyl-GPC (18:2/18:2)	1201	TRUE	-1.21181	0.0435739	0.240811	0.0309803	0.0287809	0.00654559	0.0333274	6.6229e-23	0.700595	0.0036583	0.43974	0.781945	4.20423e-06	2.12471e-26	0.961701
147	Tot-cholesterol	fructose	1023	TRUE	6.07406	-0.354601	-0.164446	-0.193966	-0.0808131	0.000676856	-0.0114102	3.40869e-77	0.248986	0.421793	0.126346	0.781367	0.859933	0.0909839	0.961701
327	LDL	leucine	1022	TRUE	3.46434	-0.646907	-0.141466	0.14006	0.127823	-0.00800323	0.00462092	2.38538e-23	0.177706	0.4583	0.536968	0.779215	0.0250939	0.476628	0.961701
263	Tot-cholesterol	1-stearoyl-2-linoleoyl-GPE (18:0/18:2)*	1022	TRUE	5.62771	-0.403045	-0.219215	0.307765	-0.037089	0.00153839	-0.0178059	1.68607e-74	0.0272738	0.277713	4.98438e-07	0.777825	0.684739	0.00832971	0.961701
228	HDL	1-oleoyl-2-docosahexaenoyl-GPC (18:1/22:6)*	1023	TRUE	2.03198	-0.00345191	-0.192024	0.315307	0.0280658	0.00524872	-0.0298466	7.57764e-46	0.975591	0.0284027	1.0339e-11	0.783095	0.00151042	1.3877e-23	0.961701
161	HDL	N-acetylisoleucine	1013	TRUE	2.57353	-0.0144119	-0.184319	-0.236872	0.0336058	0.00748005	-0.0342969	1.21804e-76	0.902734	0.0382079	1.35864e-06	0.775952	8.13918e-06	2.02022e-30	0.961701
332	Tot-cholesterol	4-methyl-2-oxopentanoate	1023	TRUE	5.88379	-0.364889	-0.187066	0.00377421	-0.0470232	0.00072977	-0.0120172	8.21816e-76	0.152683	0.361348	0.957436	0.775689	0.849414	0.0746055	0.961701
134	HDL	succinylcarnitine (C4-DC)	998	TRUE	2.43123	0.0624417	-0.152223	-0.199786	-0.0354694	0.00840304	-0.0319193	6.23637e-73	0.65208	0.105042	0.00021068	0.775047	1.2206e-06	3.32589e-25	0.961701
315	HDL	sphingomyelin (d18:2/16:0, d18:1/16:1)*	1023	TRUE	1.78462	-0.00427699	-0.124759	0.718444	0.044811	0.00598577	-0.0387866	2.36074e-37	0.97974	0.137838	9.07218e-29	0.774553	0.000145821	2.1904e-44	0.961701
539	Triglycerides	oleoyl-linoleoyl-glycerol (18:1/18:2) [2]	1200	TRUE	-1.25753	0.00402307	0.179647	0.560617	0.0121492	0.00382148	0.0180166	1.20438e-65	0.939841	0.00128441	2.98475e-177	0.771465	7.05618e-05	2.12844e-17	0.961701
398	Tot-cholesterol	sphingosine 1-phosphate	1023	TRUE	5.96443	-0.549883	-0.188748	-0.07987	0.118667	0.000744559	-0.0119194	1.16884e-63	0.170473	0.356724	0.665543	0.769918	0.846229	0.0776198	0.961701
283	Triglycerides	N-acetylvaline	1201	TRUE	-1.2992	0.0272103	0.226469	0.264938	0.0498271	0.00567377	0.0294946	2.60534e-29	0.876303	0.00539541	0.000220189	0.769354	5.69241e-05	3.69754e-21	0.961701
517	Tot-cholesterol	1-stearoyl-2-dihomo-linolenoyl-GPC (18:0/20:3n3 or 6)*	1023	TRUE	5.21212	-0.317335	-0.27563	1.08977	-0.0652677	0.000997935	-0.0346846	1.98146e-69	0.227122	0.150574	1.30703e-28	0.766541	0.781417	1.46931e-07	0.961701
376	HDL	2-methylbutyrylcarnitine (C5)	1018	TRUE	2.41273	-0.00268606	-0.173985	-0.109491	0.0272696	0.00778332	-0.0331388	1.29108e-70	0.980091	0.0574366	0.00755501	0.764424	5.84314e-06	3.04367e-27	0.961701
454	HDL	1-stearoyl-2-oleoyl-GPE (18:0/18:1)	1010	TRUE	2.44807	0.0486852	-0.168235	-0.0682612	-0.0121668	0.00661141	-0.0331447	6.02701e-73	0.474022	0.0600685	0.00109176	0.776331	8.80314e-05	8.00483e-28	0.961701
95	Tot-cholesterol	3-hydroxy-2-ethylpropionate	1023	TRUE	5.88385	-0.498889	-0.185922	0.0197628	0.0557199	0.000562103	-0.0122626	4.66772e-76	0.0788495	0.364128	0.849802	0.812226	0.884654	0.0700848	0.970956
243	HDL	mannose	1023	TRUE	2.44718	-0.000919556	-0.191715	-0.0666387	0.0267002	0.00704364	-0.0344574	2.65699e-70	0.99457	0.0329121	0.19417	0.810079	3.00437e-05	4.59114e-29	0.970956
555	LDL	sphingomyelin (d18:1/24:1, d18:2/24:0)*	998	TRUE	1.91942	-0.526106	0.0113273	1.47316	0.0866435	-0.0109863	0.0152444	6.42772e-11	0.160343	0.948442	2.78879e-38	0.809924	0.000899235	0.00915439	0.970956
255	Glucose	N-acetylvaline	1098	TRUE	1.25626	-0.0326638	0.00662367	0.0679819	0.0105013	0.00191245	0.00625808	4.50796e-237	0.472812	0.75924	0.000270077	0.811441	2.29337e-05	2.24003e-15	0.970956
188	LDL	1,5-anhydroglucitol (1,5-AG)	1021	TRUE	3.50337	-0.567991	-0.149756	0.0717226	0.0620795	-0.00775626	0.0052709	2.3747e-30	0.0292953	0.433003	0.488894	0.809173	0.0305085	0.401906	0.970956
501	Tot-cholesterol	succinate	1023	TRUE	6.00383	-0.523025	-0.186869	-0.120451	0.0961262	0.000583066	-0.0118197	1.58241e-69	0.143798	0.363074	0.430341	0.806193	0.879541	0.0796641	0.970956
80	Glucose	palmitoyl dihydrosphingomyelin (d18:0/16:0)*	1098	TRUE	1.3618	-0.0346105	0.00387683	-0.0492202	0.0106068	0.00203548	0.0065025	4.40995e-236	0.424919	0.85822	0.00172286	0.800791	6.67155e-06	1.04912e-16	0.970956
362	Tot-cholesterol	1-stearoyl-2-arachidonoyl-GPE (18:0/20:4)	1023	TRUE	5.8304	-0.384714	-0.2049	0.0825199	-0.0401177	0.000567519	-0.0131906	1.86872e-78	0.083589	0.318202	0.258391	0.809249	0.882766	0.0532431	0.970956
403	HDL	fumarate	1022	TRUE	2.38985	0.0623007	-0.192208	0.0273775	-0.0343061	0.00684376	-0.0356903	1.18239e-62	0.682822	0.0327006	0.657317	0.815166	6.13664e-05	4.59696e-33	0.972449
431	HDL	sphingomyelin (d18:1/14:0, d16:1/16:0)*	1023	TRUE	1.90134	0.0667138	-0.156304	0.491026	-0.0312367	0.00605514	-0.0344126	5.73715e-42	0.654739	0.0688114	1.36817e-20	0.817278	0.000172055	4.73376e-34	0.97295
328	HDL	1-stearoyl-2-docosahexaenoyl-GPC (18:0/22:6)	1023	TRUE	2.26734	0.0523184	-0.194127	0.166558	-0.0200235	0.0056785	-0.034631	3.95239e-60	0.636332	0.0291904	8.54378e-06	0.822303	0.000772741	5.30299e-32	0.973767
154	Tot-cholesterol	1-stearoyl-2-oleoyl-GPE (18:0/18:1)	1010	TRUE	5.89665	-0.461071	-0.213342	0.0678147	0.0219823	0.000638193	-0.0149986	1.5512e-80	0.00306459	0.297688	0.156532	0.822618	0.868673	0.0306914	0.973767
42	Triglycerides	sphingomyelin (d18:2/16:0, d18:1/16:1)*	1201	TRUE	-1.18199	0.111441	0.237798	0.0323125	-0.0375064	0.00633066	0.0326407	5.8275e-24	0.521291	0.00409756	0.659159	0.823045	1.99195e-05	1.7463e-25	0.973767
131	Glucose	sphingomyelin (d18:1/20:1, d18:2/20:0)*	1098	TRUE	1.38362	-0.0327887	0.00787429	-0.0875907	0.00845149	0.00206706	0.00701104	2.97818e-259	0.478602	0.71322	2.09073e-06	0.852781	3.75145e-06	5.00178e-20	0.973965
267	Glucose	3-methyl-2-oxovalerate	1098	TRUE	1.26211	-0.0180413	0.0146869	0.0381782	-0.0037907	0.00188636	0.00671486	3.35691e-258	0.552093	0.494691	1.01984e-05	0.854865	2.64455e-05	2.1911e-18	0.973965
76	LDL	3-hydroxy-2-ethylpropionate	1023	TRUE	3.58591	-0.556635	-0.14855	-0.0112794	0.0394705	-0.00809597	0.00613669	1.16278e-33	0.0350348	0.435661	0.9075	0.85644	0.024698	0.329845	0.973965
382	Triglycerides	palmitoyl sphingomyelin (d18:1/16:0)	1201	TRUE	-0.912744	0.0260298	0.217638	-0.263721	0.0415088	0.00730992	0.0316305	4.75134e-11	0.910185	0.00845789	0.00452172	0.857316	4.33995e-07	8.4192e-25	0.973965
163	Glucose	3-methylglutaconate	1069	TRUE	1.27299	-0.016954	-0.00940738	0.0252824	-0.00288987	0.00199464	0.00690157	1.0132e-261	0.423178	0.67366	0.000613543	0.860703	1.3885e-05	9.86352e-19	0.973965
435	Tot-cholesterol	palmitoyl dihydrosphingomyelin (d18:0/16:0)*	1023	TRUE	2.96119	-0.256613	0.113343	2.26968	-0.0527553	0.00116329	0.00679502	1.08088e-23	0.399609	0.506033	3.459e-88	0.858521	0.715363	0.229992	0.973965
456	Glucose	sphinganine	477	TRUE	1.22128	-0.00836674	0.0231085	0.00701506	-0.00660993	0.00301568	0.00739553	1.07195e-86	0.842729	0.472165	0.66503	0.860404	4.87315e-05	8.22899e-09	0.973965
169	Tot-cholesterol	1-palmitoyl-2-linoleoyl-GPE (16:0/18:2)	1023	TRUE	5.69918	-0.418471	-0.197556	0.210126	-0.0221479	0.00117366	-0.0151704	3.18182e-75	0.0182064	0.331302	0.00058582	0.862171	0.758296	0.0246242	0.973965
178	LDL	1-margaroyl-2-linoleoyl-GPC (17:0/18:2)*	1023	TRUE	2.03829	-0.543791	-0.0869414	1.14428	0.0526362	-0.00980744	0.0221991	3.01894e-11	0.0684956	0.628012	9.61806e-26	0.850156	0.00357703	0.000261033	0.973965
531	Triglycerides	mannose	1201	TRUE	-1.16477	0.0931857	0.236571	-0.000849596	-0.0194692	0.00651398	0.0328678	1.64551e-26	0.427814	0.00430582	0.986274	0.858351	7.6601e-06	2.36892e-24	0.973965
51	Glucose	1-stearoyl-2-docosapentaenoyl-GPC (18:0/22:5n3)*	1098	TRUE	1.30098	-0.0275597	0.00964493	-0.00381089	0.00500236	0.0020713	0.00692441	1.70097e-255	0.390601	0.659152	0.737081	0.849643	6.00311e-06	7.80949e-19	0.973965
530	Tot-cholesterol	stearoyl sphingomyelin (d18:1/18:0)	1023	TRUE	3.80892	-0.28363	-0.0374598	2.33314	-0.0575579	-0.00388866	-0.0159386	4.28474e-39	0.410527	0.830636	2.04334e-71	0.860637	0.237587	0.00571758	0.973965
125	HDL	sphingosine 1-phosphate	1023	TRUE	2.3263	0.0631787	-0.191071	0.0887988	-0.0342402	0.00695804	-0.0358272	1.34369e-50	0.719897	0.0336153	0.273852	0.847599	3.67918e-05	1.38682e-33	0.973965
286	HDL	sphingomyelin (d18:1/18:1, d18:2/18:0)	1023	TRUE	2.06309	0.0705263	-0.158223	0.496488	-0.0306023	0.00569203	-0.0391098	3.43374e-48	0.666412	0.0702162	1.77972e-13	0.843799	0.000533318	2.72578e-41	0.973965
205	Tot-cholesterol	1,5-anhydroglucitol (1,5-AG)	1021	TRUE	5.85278	-0.379276	-0.180423	0.0461521	-0.0547057	0.000869904	-0.012718	1.35517e-70	0.17637	0.380126	0.679442	0.843288	0.821633	0.060201	0.973965
33	Triglycerides	1-palmitoyl-2-arachidonoyl-GPE (16:0/20:4)*	1201	TRUE	-1.27123	0.0266814	0.223627	0.395287	0.011947	0.00358327	0.0272055	2.38371e-40	0.714868	0.00219663	1.35431e-47	0.841732	0.00477163	1.75506e-23	0.973965
551	Tot-cholesterol	1-palmitoyl-2-palmitoleoyl-GPC (16:0/16:1)*	1023	TRUE	5.53642	-0.426183	-0.172906	0.445299	-0.0297596	0.00120897	-0.0196534	1.57081e-73	0.030355	0.386161	4.25963e-11	0.836313	0.746647	0.0031316	0.973965
250	Tot-cholesterol	2-methylbutyrylcarnitine (C5)	1018	TRUE	5.90469	-0.480143	-0.192721	0.0282716	0.0433811	0.00039727	-0.0129656	1.61965e-80	0.0512576	0.357671	0.763182	0.834959	0.919465	0.0645317	0.973965
146	LDL	1-palmitoyl-2-linoleoyl-GPE (16:0/18:2)	1023	TRUE	3.51558	-0.546511	-0.155345	0.0671779	0.0255236	-0.0079177	0.004931	1.08859e-33	0.000981257	0.414282	0.240079	0.830692	0.0265411	0.435076	0.973965
271	Triglycerides	isobutyrylcarnitine (C4)	1201	TRUE	-1.16718	0.0853031	0.234476	-0.0256736	-0.01312	0.00693883	0.0331015	8.25215e-27	0.258148	0.00472452	0.297113	0.829512	1.23085e-06	8.68176e-27	0.973965
148	Tot-cholesterol	N-palmitoyl-sphingosine (d18:1/16:0)	1023	TRUE	4.04095	-0.305176	-0.148254	1.96974	-0.059923	-0.00441562	-0.0103421	2.91312e-44	0.310184	0.401668	6.26135e-65	0.82879	0.184228	0.0765512	0.973965
220	HDL	choline phosphate	978	TRUE	2.31901	0.0124006	-0.14737	0.0901651	0.0153798	0.00692852	-0.0356603	4.26724e-61	0.882863	0.120588	0.00258901	0.826928	7.47359e-05	2.72845e-32	0.973965
526	Glucose	1-oleoyl-2-dihomo-linolenoyl-GPC (18:1/20:3)*	1097	TRUE	1.3061	-0.0268241	0.0102373	-0.0133588	0.00427525	0.00208635	0.00708775	2.6544e-276	0.311358	0.638826	0.178935	0.848611	4.95175e-06	2.71405e-19	0.973965
342	Glucose	1-palmitoyl-2-arachidonoyl-GPC (16:0/20:4n6)	1098	TRUE	1.29551	-0.0165769	0.00921755	0.00128185	-0.00454046	0.00205439	0.00694503	5.55431e-235	0.671871	0.673058	0.928619	0.893723	6.41759e-06	5.54273e-19	0.975268
457	HDL	glycerate	1023	TRUE	2.26659	0.0461236	-0.191042	0.101298	-0.0184513	0.00742209	-0.0349149	1.73741e-48	0.724496	0.0334042	0.0739133	0.893813	1.37702e-05	1.01985e-31	0.975268
138	Glucose	sphingomyelin (d18:1/14:0, d16:1/16:0)*	1098	TRUE	1.32653	-0.0277541	0.00789718	-0.0271339	0.00537113	0.00207249	0.00689337	5.75829e-248	0.529314	0.71661	0.0587737	0.893981	4.92505e-06	7.56288e-19	0.975268
175	Glucose	1-margaroyl-2-oleoyl-GPC (17:0/18:1)*	1098	TRUE	1.29452	-0.0169906	0.0089812	0.00207383	-0.00432723	0.00204982	0.00696388	2.43513e-234	0.644456	0.68153	0.882255	0.89586	7.6172e-06	1.50251e-18	0.975268
247	HDL	oleoyl-linoleoyl-glycerol (18:1/18:2) [2]	1021	TRUE	2.52772	0.0610014	-0.157494	-0.289539	-0.00764538	0.0071977	-0.0288857	2.74751e-86	0.430039	0.0627109	6.21877e-25	0.897266	5.72089e-06	3.60456e-24	0.975268
160	LDL	1-stearoyl-2-arachidonoyl-GPE (18:0/20:4)	1023	TRUE	3.62734	-0.487808	-0.127879	-0.0820662	-0.0183835	-0.00796272	0.00752839	4.18521e-36	0.0182993	0.502884	0.226715	0.905303	0.0260845	0.235498	0.975268
8	Triglycerides	1-stearoyl-2-oleoyl-GPE (18:0/18:1)	1187	TRUE	-1.01259	0.0391041	0.142651	0.336693	-0.00460247	0.00363598	0.0188558	3.06175e-31	0.460462	0.0302612	2.21746e-77	0.903141	0.00151229	5.5507e-14	0.975268
308	Triglycerides	malate	1145	TRUE	-1.19966	0.0708364	0.193586	0.0385623	-0.00813526	0.00621299	0.0332194	2.5252e-27	0.400502	0.0269467	0.21085	0.90432	1.96549e-05	3.20732e-25	0.975268
240	LDL	1-stearoyl-2-linoleoyl-GPE (18:0/18:2)*	1022	TRUE	3.44769	-0.537526	-0.168391	0.154664	0.0147485	-0.00764677	0.00292233	1.0758e-32	0.00172389	0.374787	0.00715776	0.904934	0.031723	0.644878	0.975268
226	Glucose	sphingosine 1-phosphate	1097	TRUE	1.26598	-0.0270268	0.00906641	0.0316547	0.00630776	0.00208802	0.00684675	6.95077e-202	0.562588	0.677575	0.138838	0.892621	4.42519e-06	1.7723e-18	0.975268
197	Tot-cholesterol	glycerophosphorylcholine (GPC)	1023	TRUE	4.76666	-0.434215	-0.132849	0.74807	-0.0329414	0.00253257	-0.002681	4.79341e-45	0.133615	0.505776	9.30147e-12	0.901124	0.499509	0.688612	0.975268
355	Triglycerides	arabonate/xylonate	1201	TRUE	-1.1966	0.0901412	0.23553	0.0579755	-0.0123354	0.00612887	0.0324203	7.30975e-28	0.380892	0.00435924	0.109615	0.891244	2.01234e-05	6.62154e-26	0.975268
363	LDL	3-methyl-2-oxobutyrate	1023	TRUE	3.62408	-0.484683	-0.155711	-0.0593693	-0.0191973	-0.00764374	0.00642929	6.9824e-36	0.0297762	0.414085	0.319609	0.887853	0.0337569	0.309626	0.975268
321	Glucose	sphinganine-1-phosphate	974	TRUE	1.29072	-0.0193976	0.0248826	0.0196733	-0.00479036	0.00195376	0.0066352	9.84824e-225	0.583496	0.283024	0.142	0.889195	5.19401e-05	1.71155e-16	0.975268
349	HDL	isovalerylcarnitine (C5)	1021	TRUE	2.43975	0.0184947	-0.201956	-0.0978544	0.0107509	0.00725679	-0.0335637	1.44293e-72	0.841868	0.0243401	0.0092213	0.889131	1.68959e-05	1.23915e-28	0.975268
390	Tot-cholesterol	sphingomyelin (d18:1/17:0, d17:1/18:0, d19:1/16:0)	1023	TRUE	3.86672	-0.313697	0.0318178	1.9935	-0.038579	-0.00670504	0.00150023	1.04416e-42	0.284637	0.854336	1.03922e-78	0.888817	0.0399292	0.793626	0.975268
495	LDL	1-stearoyl-2-dihomo-linolenoyl-GPC (18:0/20:3n3 or 6)*	1023	TRUE	3.09114	-0.507987	-0.216909	0.790295	0.0244196	-0.00787313	-0.0106969	6.9847e-28	0.0427882	0.23588	3.44703e-17	0.907346	0.0218218	0.0894111	0.975268
248	HDL	1-palmitoyl-2-arachidonoyl-GPC (16:0/20:4n6)	1023	TRUE	2.03096	0.0580452	-0.19386	0.351198	-0.0191651	0.00712663	-0.0368149	7.57963e-45	0.697224	0.0273887	1.67934e-10	0.882466	1.5408e-05	6.0021e-37	0.975268
338	HDL	1-palmitoyl-2-oleoyl-GPI (16:0/18:1)*	974	TRUE	2.54846	0.015528	-0.208228	-0.17657	0.0127871	0.00622107	-0.0321208	1.03783e-69	0.878763	0.020017	2.73381e-05	0.879807	0.000330353	8.15201e-26	0.975268
24	Glucose	glycerophosphorylcholine (GPC)	1098	TRUE	1.39323	-0.0149746	0.00378977	-0.062189	-0.0049283	0.00187759	0.00613322	1.00039e-262	0.659922	0.859717	9.57121e-07	0.875599	2.83207e-05	2.85306e-15	0.975268
135	LDL	ribitol	1000	TRUE	3.8689	-0.571926	-0.067799	-0.472511	0.0435311	-0.00774684	0.0126818	7.88217e-39	0.0478496	0.723958	2.64071e-05	0.871908	0.0298499	0.0484788	0.975268
316	LDL	succinate	1023	TRUE	3.65351	-0.566469	-0.150623	-0.0836426	0.0591083	-0.00820695	0.00627583	9.39342e-31	0.0887815	0.430643	0.556105	0.871172	0.0218573	0.317182	0.975268
465	LDL	2-hydroxy-3-methylvalerate	1023	TRUE	3.63994	-0.478108	-0.136012	-0.10737	-0.0259224	-0.00810018	0.00825136	3.21441e-36	0.018834	0.474657	0.0827418	0.87111	0.0230672	0.19496	0.975268
170	HDL	1-palmitoyl-2-docosahexaenoyl-GPC (16:0/22:6)	1023	TRUE	2.07418	0.0381027	-0.165837	0.297932	-0.0163981	0.00522322	-0.0315401	2.34916e-49	0.745992	0.0581685	9.59381e-13	0.867087	0.00160403	4.64267e-27	0.975268
417	Glucose	1-palmitoyl-2-arachidonoyl-GPI (16:0/20:4)*	1029	TRUE	1.3169	-0.0144824	-0.00180394	-0.00189996	-0.00281372	0.00190293	0.00652474	7.76751e-262	0.574886	0.936294	0.855634	0.89	3.45327e-05	2.29361e-16	0.975268
546	Glucose	4-methyl-2-oxopentanoate	1098	TRUE	1.27356	-0.0262363	0.0123969	0.020506	0.00215923	0.00198846	0.00690915	7.82946e-256	0.358764	0.568007	0.00912832	0.907423	1.13758e-05	4.61771e-19	0.975268
306	LDL	sphingomyelin (d18:1/21:0, d17:1/22:0, d16:1/23:0)*	1023	TRUE	1.67597	-0.389079	-0.0906062	1.54002	-0.0307702	-0.00711228	0.0130247	2.86963e-09	0.186293	0.593557	7.46558e-52	0.912746	0.0255798	0.0201747	0.977335
127	LDL	4-methyl-2-oxopentanoate	1023	TRUE	3.71845	-0.528478	-0.167378	-0.113923	0.0168916	-0.00789024	0.00621216	4.55054e-36	0.0257208	0.379092	0.0828807	0.912233	0.0270666	0.320975	0.977335
272	Glucose	1-myristoyl-2-palmitoyl-GPC (14:0/16:0)	1098	TRUE	1.28527	-0.0239266	0.00922198	0.00934537	0.00191561	0.00207118	0.00694597	6.93562e-253	0.292029	0.672394	0.272573	0.91475	5.33965e-06	5.43134e-19	0.977661
491	Glucose	3-hydroxy-2-ethylpropionate	1097	TRUE	1.28649	-0.0250728	0.00949123	0.0164089	0.00267756	0.00198095	0.00681258	1.70556e-256	0.445093	0.663232	0.160942	0.921244	1.47689e-05	2.82434e-18	0.981567
317	Triglycerides	sphingomyelin (d18:2/23:0, d18:1/23:1, d17:1/24:1)*	1201	TRUE	-1.08608	0.0542699	0.23075	-0.101512	0.0159864	0.00703991	0.0326417	7.86321e-20	0.744197	0.00522119	0.112105	0.921819	1.45751e-06	2.01273e-26	0.981567
282	HDL	stearoyl sphingomyelin (d18:1/18:0)	1023	TRUE	2.06983	0.0589279	-0.167618	0.382379	-0.0158356	0.00615481	-0.0362358	4.19018e-45	0.734646	0.0577814	6.49831e-09	0.923717	0.000211191	1.32294e-35	0.98177
558	Triglycerides	1-oleoyl-2-dihomo-linolenoyl-GPC (18:1/20:3)*	1200	TRUE	-1.32727	0.0668246	0.222087	0.351812	0.00731436	0.00527184	0.0278108	3.55702e-38	0.437931	0.00418227	4.56293e-24	0.925484	8.10409e-05	1.24174e-21	0.981833
281	LDL	behenoyl sphingomyelin (d18:1/22:0)*	997	TRUE	0.87783	-0.355351	-0.0511057	2.12381	-0.0317291	-0.00106335	0.00831295	0.00234699	0.307921	0.754786	2.80543e-72	0.928161	0.733387	0.127211	0.982846
326	Tot-cholesterol	sphingomyelin (d18:1/21:0, d17:1/22:0, d16:1/23:0)*	1023	TRUE	3.4486	-0.341876	-0.11093	1.9754	0.0250189	0.00212365	-0.00325329	1.51544e-33	0.251258	0.51865	2.54635e-82	0.929858	0.510184	0.566463	0.982846
344	Triglycerides	sphingomyelin (d18:1/20:1, d18:2/20:0)*	1201	TRUE	-1.11812	0.0868342	0.24063	-0.0500063	-0.014751	0.00655003	0.0329365	1.28965e-19	0.627422	0.00366932	0.447882	0.932123	4.22553e-06	9.96907e-27	0.983433
486	LDL	tiglylcarnitine (C5:1-DC)	1016	TRUE	3.50633	-0.489336	-0.155697	0.115608	-0.0185303	-0.00891783	0.00605347	7.76125e-33	0.0749417	0.414563	0.219007	0.939271	0.0137875	0.336131	0.985549
120	Triglycerides	choline	1201	TRUE	-1.16992	0.088083	0.237297	0.00937972	-0.0141837	0.00646667	0.0327613	5.99529e-19	0.649201	0.00416044	0.912094	0.937918	5.80312e-06	2.52056e-26	0.985549
499	Tot-cholesterol	tricosanoyl sphingomyelin (d18:1/23:0)*	766	TRUE	4.86309	-0.379009	-0.264984	0.715914	0.0227749	0.00439044	-0.0109326	1.8045e-42	0.206333	0.234432	3.19746e-15	0.938212	0.297995	0.135588	0.985549
519	Triglycerides	sphinganine-1-phosphate	1109	TRUE	-1.17876	0.0874235	0.277929	-0.00681652	0.00843212	0.00600117	0.0343394	3.18602e-23	0.490712	0.00151282	0.882184	0.943038	7.28617e-05	1.23937e-26	0.987699
65	HDL	succinate	1023	TRUE	2.44339	0.0167168	-0.192884	-0.0343104	0.0111013	0.00687464	-0.0355467	6.8071e-60	0.91533	0.0326445	0.609242	0.94859	4.78625e-05	3.83738e-33	0.991708
35	LDL	isoleucine	1022	TRUE	3.64216	-0.484302	-0.155312	-0.0956734	-0.0231956	-0.00803643	0.00716091	8.63384e-30	0.241522	0.415358	0.608414	0.951481	0.0245535	0.272647	0.992925
117	Tot-cholesterol	sphingomyelin (d18:2/14:0, d18:1/14:1)*	1013	TRUE	4.81065	-0.396337	-0.0191137	1.74444	-0.00325703	-0.00186986	-0.0375276	4.78959e-71	0.128127	0.913911	3.24266e-72	0.988658	0.567933	1.77583e-10	0.997296
56	HDL	sphingomyelin (d18:1/21:0, d17:1/22:0, d16:1/23:0)*	1023	TRUE	1.8928	0.0554782	-0.175786	0.420177	-0.0027964	0.00718924	-0.033726	2.67478e-39	0.712497	0.0428972	6.29577e-16	0.984464	1.02005e-05	6.06504e-32	0.997296
102	Triglycerides	1-stearoyl-2-oleoyl-GPC (18:0/18:1)	1201	TRUE	-1.34558	0.0601671	0.221928	0.406621	0.00176384	0.00382473	0.0293895	1.08875e-37	0.569032	0.00419685	1.53831e-18	0.985233	0.00477398	2.81618e-24	0.997296
274	Tot-cholesterol	choline	1023	TRUE	5.63464	-0.421806	-0.182585	0.310302	-0.00921866	0.000437632	-0.0130044	1.92862e-56	0.394775	0.372089	0.149072	0.98558	0.909268	0.0543855	0.997296
132	LDL	1-stearoyl-2-oleoyl-GPE (18:0/18:1)	1010	TRUE	3.60926	-0.505399	-0.149555	-0.0234866	-0.000318075	-0.00843577	0.00699265	9.47304e-36	0.000496016	0.433447	0.598498	0.997223	0.0190404	0.279733	0.997296
108	Triglycerides	1-palmitoyl-2-oleoyl-GPE (16:0/18:1)	1170	TRUE	-1.00544	0.0342757	0.147522	0.323809	0.000383306	0.00351563	0.0189865	7.97298e-30	0.526336	0.0276422	1.22535e-75	0.991724	0.00272048	1.98016e-13	0.997296
318	Glucose	1-oleoyl-2-docosahexaenoyl-GPC (18:1/22:6)*	1098	TRUE	1.33647	-0.0212253	0.0108138	-0.035092	-0.00020323	0.00227129	0.00630831	2.87765e-258	0.518007	0.618927	0.00549916	0.994625	7.17333e-07	3.77835e-15	0.997296
511	HDL	pyruvate	1022	TRUE	2.4031	0.0288349	-0.209115	-0.0137087	0.000145818	0.00708445	-0.0348914	1.93071e-70	0.702017	0.0222644	0.412776	0.997016	3.11746e-05	2.01374e-30	0.997296
230	HDL	sphinganine-1-phosphate	908	TRUE	2.33549	0.0204241	-0.161514	0.0341634	0.00279124	0.00775249	-0.035428	6.51809e-54	0.876782	0.0935439	0.506906	0.982489	1.67479e-05	4.45279e-30	0.997296
139	HDL	oleoyl-linoleoyl-glycerol (18:1/18:2) [1]	1022	TRUE	2.5112	0.0559258	-0.147001	-0.332706	0.00062035	0.00766952	-0.0276341	2.74081e-89	0.462112	0.0761601	1.4662e-33	0.991484	8.1307e-07	4.48614e-23	0.997296
20	Triglycerides	1-palmitoyl-2-linoleoyl-GPE (16:0/18:2)	1201	TRUE	-1.32856	0.0350525	0.236837	0.400619	-0.00107151	0.0050918	0.0250099	2.4101e-50	0.571629	0.000486866	1.64354e-73	0.98204	1.31848e-05	8.13208e-23	0.997296
497	LDL	1-stearoyl-2-docosapentaenoyl-GPC (18:0/22:5n6)*	1020	TRUE	3.28519	-0.501416	-0.211865	0.289566	0.0054362	-0.00700023	0.00146227	1.2117e-29	0.0123327	0.263199	2.47485e-05	0.972431	0.0495481	0.816085	0.997296
451	LDL	palmitoyl-linoleoyl-glycerol (16:0/18:2) [2]*	965	TRUE	3.66165	-0.566543	-0.0858985	0.181889	0.00318521	-0.00826451	-0.00313279	2.60513e-36	7.66636e-05	0.660813	0.00180603	0.976839	0.0222012	0.635556	0.997296
367	Tot-cholesterol	phosphate	1023	TRUE	5.9024	-0.462694	-0.186291	-0.0147176	0.0292688	0.000759237	-0.0120388	2.60912e-29	0.630185	0.36303	0.972089	0.9759	0.843537	0.0743884	0.997296
550	Glucose	ribitol	1073	TRUE	1.25773	-0.0191252	0.0149608	0.0743762	0.0010414	0.00200051	0.00562836	1.75115e-250	0.598556	0.490635	1.81629e-07	0.975677	8.96927e-06	1.90311e-12	0.997296
543	LDL	1-palmitoyl-2-arachidonoyl-GPE (16:0/20:4)*	1023	TRUE	3.6789	-0.511736	-0.127695	-0.113916	0.00423038	-0.00806803	0.0072946	1.05525e-36	0.00677811	0.502415	0.0706096	0.97527	0.0238321	0.245941	0.997296
399	Glucose	isovalerylglycine	1080	TRUE	1.25883	-0.0209129	0.012101	0.0352724	-0.00076536	0.00217811	0.00684678	3.25609e-246	0.405984	0.581245	0.000693051	0.975066	1.70691e-06	2.32309e-18	0.997296
49	HDL	arabonate/xylonate	1023	TRUE	2.40543	0.0252793	-0.191834	0.00641417	0.00263199	0.00690213	-0.0356328	7.09874e-68	0.791708	0.032989	0.862817	0.974785	4.43816e-05	2.67325e-33	0.997296
44	HDL	sphingomyelin (d17:1/16:0, d18:1/15:0, d16:1/17:0)*	1023	TRUE	1.93926	0.0313511	-0.147921	0.4273	0.00493976	0.00569332	-0.0321074	4.11433e-42	0.830129	0.0886354	6.90131e-16	0.970967	0.000488737	8.79694e-29	0.997296
479	LDL	1-palmitoyl-2-linoleoyl-GPI (16:0/18:2)	975	TRUE	3.26287	-0.510272	-0.144543	0.292693	-0.00817152	-0.00675097	0.00294314	9.29153e-27	0.0269756	0.448107	0.00106372	0.967442	0.0631383	0.647109	0.997296
99	LDL	sphingomyelin (d18:2/14:0, d18:1/14:1)*	1013	TRUE	2.75525	-0.474753	-0.0223198	1.32473	-0.0105692	-0.0100566	-0.0132463	7.15538e-25	0.0661634	0.898648	1.08036e-42	0.962912	0.00194747	0.023092	0.997296
565	LDL	1-palmitoyl-2-arachidonoyl-GPI (16:0/20:4)*	963	TRUE	3.17666	-0.53263	-0.077578	0.200173	-0.00793182	-0.00554163	0.0072337	1.07363e-25	0.0110696	0.697661	0.0175483	0.961438	0.130057	0.265074	0.997296
237	Glucose	isobutyrylcarnitine (C4)	1094	TRUE	1.29351	-0.0217828	0.00810182	0.0198876	0.000355431	0.00186925	0.00665219	9.58317e-275	0.272037	0.710357	0.00309175	0.980925	4.14074e-05	1.72735e-17	0.997296
252	LDL	valine	1023	TRUE	3.24054	-0.517795	-0.133452	0.427551	-0.00158141	-0.00797256	0.00188362	7.99453e-21	0.293334	0.482847	0.066623	0.997296	0.025297	0.77504	0.997296

## Sheet: F_E4
	col1	col2	n	converged	Intercept	C(APOE_Status)[T.E4]	Statin_User[T.Yes]	analyte2	analyte2:C(APOE_Status)[T.E4]	Age	BMI	Intercept_p	C(APOE_Status)[T.E4]_p	Statin_User[T.Yes]_p	analyte2_p	analyte2:C(APOE_Status)[T.E4]_p	Age_p	BMI_p	pval_adj
562	Tot-cholesterol	isovalerylglycine	1104	TRUE	6.21729	-0.490508	-0.225563	-0.242258	0.684989	-5.18457e-05	-0.013778	1.81568e-87	0.00865254	0.255688	0.0107604	0.000171134	0.98914	0.0348749	0.0472038
477	Tot-cholesterol	sphingomyelin (d18:1/20:1, d18:2/20:0)*	1123	TRUE	3.80422	1.23058	-0.13634	2.25	-1.05057	-0.000816547	-0.0164757	2.58252e-34	4.14682e-05	0.449364	1.49952e-50	0.000238308	0.812042	0.00495584	0.0472038
538	LDL	isovalerylglycine	1104	TRUE	3.77585	-0.372631	-0.183487	-0.142294	0.619362	-0.00837827	0.00432455	1.41117e-38	0.0314196	0.318503	0.106079	0.000246281	0.0176493	0.475005	0.0472038
449	Glucose	isoleucine	1206	TRUE	1.18355	0.136732	0.026217	0.141557	-0.146721	0.00184385	0.0061206	2.94939e-222	0.00225743	0.181905	4.33401e-11	0.000528412	1.06664e-05	1.9026e-17	0.0759592
177	Glucose	leucine	1206	TRUE	1.17571	0.164462	0.0284884	0.136771	-0.177669	0.00195863	0.00646098	4.9383e-183	0.00232063	0.151339	2.69206e-07	0.000705714	3.59382e-06	2.70692e-19	0.0811571
49	HDL	arabonate/xylonate	1123	TRUE	2.40424	0.164836	-0.140394	0.00586559	-0.231473	0.00707601	-0.0360295	6.40267e-74	0.0514106	0.0989881	0.873369	0.00159512	1.35058e-05	1.14266e-38	0.127481
31	Tot-cholesterol	N-acetylisoleucine	1112	TRUE	6.23136	-0.502818	-0.241759	-0.289024	0.677851	4.90952e-05	-0.0121722	9.58538e-88	0.0265306	0.220393	0.011296	0.00164874	0.989663	0.0652874	0.127481
89	Glucose	valine	1207	TRUE	1.16259	0.148383	0.0266306	0.157633	-0.161121	0.00195757	0.00613337	1.12758e-182	0.0057484	0.178128	4.77007e-09	0.00184405	3.41203e-06	4.87041e-17	0.127481
533	Glucose	fructose	1206	TRUE	1.15274	0.0631625	0.0237345	0.178284	-0.0771802	0.00183439	0.00599359	4.79945e-283	0.0166433	0.186602	3.86243e-46	0.00199535	1.63737e-06	4.63069e-21	0.127481
434	Glucose	isovalerylcarnitine (C5)	1205	TRUE	1.27069	0.0376601	0.0255644	0.0517349	-0.0509546	0.00180086	0.00643805	0	0.0625223	0.19895	8.12756e-08	0.00245699	2.18149e-05	2.47868e-19	0.141277
542	Tot-cholesterol	isobutyrylglycine	1114	TRUE	6.10476	-0.305454	-0.213204	-0.0916477	0.486213	-0.00035878	-0.0144495	4.84107e-86	0.0865879	0.282763	0.290505	0.00350535	0.924501	0.0262282	0.160061
39	HDL	sphingomyelin (d18:1/20:1, d18:2/20:0)*	1123	TRUE	1.91828	0.309122	-0.110933	0.521928	-0.384069	0.00686008	-0.0370906	2.32659e-40	0.0262506	0.183949	7.27174e-14	0.00373966	1.61702e-05	1.90733e-42	0.160061
465	LDL	2-hydroxy-3-methylvalerate	1123	TRUE	3.77416	-0.291422	-0.161404	-0.103568	0.449807	-0.00920153	0.00565152	9.39374e-41	0.123023	0.380168	0.0983103	0.00389166	0.00862798	0.348836	0.160061
15	LDL	N-acetylisoleucine	1112	TRUE	3.82082	-0.352419	-0.197245	-0.192534	0.577058	-0.00892879	0.00631784	2.70979e-39	0.093895	0.281482	0.0688837	0.00389715	0.0111538	0.302762	0.160061
286	HDL	sphingomyelin (d18:1/18:1, d18:2/18:0)	1123	TRUE	2.05601	0.290726	-0.10828	0.497095	-0.358355	0.00590814	-0.0394286	3.37637e-50	0.0324003	0.195129	1.94193e-13	0.00505824	0.000220876	2.44184e-46	0.193899
182	HDL	1-myristoyl-2-linoleoyl-GPC (14:0/18:2)*	1123	TRUE	2.02157	0.142167	-0.11419	0.335044	-0.207504	0.00803068	-0.0372077	4.23929e-51	0.0961875	0.168439	8.52373e-17	0.00575978	4.12186e-07	2.32976e-43	0.206992
206	LDL	arabitol/xylitol	1123	TRUE	3.87429	-0.394736	-0.193428	-0.268799	0.553174	-0.00823182	0.00654988	6.1324e-42	0.091856	0.292173	0.00545745	0.0068061	0.0207588	0.273859	0.230206
469	LDL	arabonate/xylonate	1123	TRUE	3.74173	-0.232837	-0.168664	-0.0558845	0.420316	-0.00929901	0.00492399	3.24399e-39	0.202817	0.358968	0.482171	0.00797649	0.00812343	0.410721	0.254804
87	Triglycerides	isoleucine	1330	TRUE	-1.1708	0.351703	0.212386	0.362239	-0.264742	0.00299468	0.0273639	1.38256e-29	0.00243435	0.00507202	2.12492e-07	0.0254651	0.0260563	1.13597e-20	0.305051
184	Tot-cholesterol	1-pentadecanoyl-2-linoleoyl-GPC (15:0/18:2)*	1123	TRUE	4.43564	0.615306	-0.0872283	1.33765	-0.429355	-0.00234022	-0.00296046	3.44985e-50	0.00369388	0.633166	1.35081e-42	0.0254285	0.500903	0.619557	0.305051
216	Tot-cholesterol	1-stearoyl-2-arachidonoyl-GPC (18:0/20:4)	1123	TRUE	5.39103	0.729923	-0.266816	0.601652	-0.47467	-0.00149616	-0.0148819	9.25713e-65	0.00466601	0.174451	3.57198e-08	0.0250669	0.689674	0.0198978	0.305051
204	Triglycerides	leucine	1330	TRUE	-1.19153	0.384457	0.209879	0.310114	-0.298474	0.00360465	0.0287657	9.94077e-29	0.00304863	0.00612107	5.31742e-05	0.0248296	0.00779438	1.51015e-22	0.305051
45	HDL	1-stearoyl-2-linoleoyl-GPC (18:0/18:2)*	1123	TRUE	1.74163	0.247673	-0.124804	0.538621	-0.311589	0.00821411	-0.0348379	1.57685e-29	0.0932687	0.134036	2.01463e-14	0.0247371	2.71783e-07	1.13387e-37	0.305051
530	Tot-cholesterol	stearoyl sphingomyelin (d18:1/18:0)	1123	TRUE	3.87116	0.804302	-0.0750105	2.33345	-0.612961	-0.00413284	-0.0176872	1.11255e-39	0.00655946	0.666628	6.25189e-66	0.024367	0.213301	0.0017914	0.305051
239	Tot-cholesterol	isoleucine	1122	TRUE	6.26172	-0.722843	-0.248861	-0.275795	0.846039	-0.000102257	-0.013199	9.56669e-75	0.0695733	0.210637	0.175486	0.0238244	0.97851	0.0496895	0.305051
284	HDL	sphingomyelin (d18:1/20:0, d16:1/22:0)*	1092	TRUE	1.97717	0.247513	-0.1221	0.399616	-0.303958	0.00745807	-0.0366616	6.97923e-41	0.0882485	0.147229	1.84583e-10	0.0236044	4.42408e-06	4.97778e-39	0.305051
135	LDL	ribitol	1102	TRUE	3.99067	-0.346163	-0.13214	-0.46062	0.541622	-0.00867609	0.00987303	1.7536e-42	0.179475	0.477498	5.54966e-05	0.0232773	0.0135101	0.107807	0.305051
158	LDL	alpha-hydroxyisocaproate	1122	TRUE	3.79549	-0.272928	-0.185701	-0.12059	0.436304	-0.00935897	0.0058364	7.0111e-38	0.225126	0.312534	0.208858	0.0227262	0.00769777	0.330601	0.305051
259	Glucose	mannitol/sorbitol	1207	TRUE	1.29691	-0.00240677	0.0199916	0.00455525	-0.00649263	0.00183893	0.00706621	0	0.812522	0.32029	0.000887831	0.0212821	1.82095e-05	3.97169e-23	0.305051
483	Tot-cholesterol	1-stearoyl-2-linoleoyl-GPC (18:0/18:2)*	1123	TRUE	2.71553	0.89025	-0.193055	2.52276	-0.669017	0.00627581	-0.00537034	3.20105e-17	0.00380031	0.266483	1.72903e-66	0.0207114	0.0596384	0.342991	0.305051
556	LDL	succinylcarnitine (C4-DC)	1100	TRUE	3.76583	-0.320653	-0.063468	-0.273828	0.50952	-0.00740935	0.00826198	7.80751e-41	0.182985	0.741014	0.018101	0.0191884	0.0411924	0.18634	0.305051
83	HDL	glycerophosphoethanolamine	1123	TRUE	2.36731	0.0873943	-0.12714	0.0526501	-0.154278	0.00692685	-0.0362511	2.1369e-68	0.267729	0.136039	0.0859772	0.0187193	2.11411e-05	5.88692e-39	0.305051
173	Tot-cholesterol	phosphatidylcholine (16:0/22:5n3, 18:1/20:4)*	1123	TRUE	4.27567	0.859814	-0.264427	1.52664	-0.6303	-0.00347313	-0.00491913	8.9909e-39	0.00499053	0.160599	1.47073e-26	0.0192408	0.335031	0.425302	0.305051
290	LDL	sphingomyelin (d18:1/20:1, d18:2/20:0)*	1123	TRUE	1.88648	0.865043	-0.103959	1.81298	-0.638484	-0.00936684	0.00286282	1.61932e-10	0.00236336	0.54273	5.44986e-37	0.0184634	0.00399908	0.60642	0.305051
29	Tot-cholesterol	mannitol/sorbitol	1123	TRUE	6.03645	0.0196544	-0.196411	-0.0284238	0.0633668	-6.87932e-05	-0.0132793	1.13644e-89	0.830953	0.323334	0.0217953	0.0111042	0.985563	0.041275	0.305051
326	Tot-cholesterol	sphingomyelin (d18:1/21:0, d17:1/22:0, d16:1/23:0)*	1123	TRUE	3.58913	0.790325	-0.100582	1.97391	-0.567178	0.000252085	-0.00407557	1.76312e-35	0.00129524	0.557989	3.04741e-75	0.0112197	0.938578	0.466225	0.305051
359	Tot-cholesterol	sphingomyelin (d18:2/24:1, d18:1/24:2)*	1123	TRUE	3.79827	0.848109	0.0273356	2.1347	-0.617207	-0.00462332	-0.00714145	4.4608e-37	0.00152346	0.876623	3.49796e-60	0.0115976	0.167936	0.211403	0.305051
56	HDL	sphingomyelin (d18:1/21:0, d17:1/22:0, d16:1/23:0)*	1123	TRUE	1.93065	0.20923	-0.106421	0.419929	-0.270233	0.00699716	-0.0347603	2.28004e-43	0.0787308	0.200615	8.08455e-16	0.0126355	1.00643e-05	1.12114e-37	0.305051
269	Tot-cholesterol	N-acetylleucine	1118	TRUE	6.14714	-0.367519	-0.241669	-0.190109	0.562155	-0.000464097	-0.0119754	2.13612e-85	0.108384	0.222519	0.117499	0.0130138	0.902596	0.0689669	0.305051
520	LDL	isobutyrylglycine	1114	TRUE	3.6735	-0.147774	-0.181144	-0.00934577	0.381938	-0.0087945	0.0041425	2.75618e-37	0.371216	0.324911	0.907455	0.0133708	0.0122323	0.491885	0.305051
574	HDL	galactonate	1024	TRUE	2.4515	0.0184795	-0.14372	-0.00247614	-0.0731356	0.00677502	-0.0365351	4.3248e-72	0.726085	0.106027	0.856975	0.0137489	6.95669e-05	1.54883e-34	0.305051
309	Triglycerides	galactonate	1242	TRUE	-1.12418	0.00800352	0.107584	-0.00825727	0.0741289	0.00585759	0.0324873	8.45321e-27	0.867511	0.175347	0.605577	0.0155721	2.41762e-05	1.03714e-29	0.305051
43	Glucose	pyruvate	1205	TRUE	1.30569	0.0138074	0.0175611	0.0328089	-0.0188675	0.00146387	0.00603249	0	0.344267	0.371708	9.66596e-16	0.0158291	0.000438229	6.02461e-18	0.305051
246	LDL	N-acetylleucine	1118	TRUE	3.72263	-0.256158	-0.199083	-0.0954778	0.502812	-0.00892964	0.00599077	1.50121e-37	0.226882	0.277842	0.395924	0.0164584	0.0110037	0.3259	0.305051
151	Tot-cholesterol	sphingomyelin (d18:1/20:0, d16:1/22:0)*	1092	TRUE	2.99213	0.870555	-0.140895	2.51204	-0.63138	0.00238902	-0.00790588	1.11746e-24	0.00240093	0.397221	1.32748e-91	0.0172905	0.45665	0.15367	0.305051
405	Tot-cholesterol	arabitol/xylitol	1123	TRUE	6.19475	-0.411881	-0.240131	-0.199404	0.520237	-0.000209634	-0.0128137	1.49495e-89	0.103829	0.226542	0.0566487	0.0185934	0.95657	0.0477276	0.305051
390	Tot-cholesterol	sphingomyelin (d18:1/17:0, d17:1/18:0, d19:1/16:0)	1123	TRUE	3.96247	0.727958	-0.0393996	1.99034	-0.536015	-0.007449	-0.000155804	4.11991e-44	0.0037053	0.819441	3.74682e-72	0.018328	0.0241847	0.977965	0.305051
487	Tot-cholesterol	2-hydroxy-3-methylvalerate	1123	TRUE	6.08244	-0.302562	-0.213183	-0.0396424	0.412675	-0.000742657	-0.0140954	2.06568e-88	0.138443	0.283496	0.558141	0.0142588	0.844483	0.0305992	0.305051
60	Triglycerides	citrate	1330	TRUE	-1.05466	0.33684	0.195002	-0.0395904	-0.232584	0.0059028	0.0314726	6.37036e-23	0.0022367	0.0115903	0.482581	0.0273432	1.93967e-05	7.10222e-28	0.314835
232	Glucose	succinylcarnitine (C4-DC)	1184	TRUE	1.27518	0.0445676	0.0268091	0.0539626	-0.0582281	0.00176406	0.0063192	7.69787e-306	0.126312	0.202291	8.3434e-05	0.027377	6.44985e-05	1.45997e-17	0.314835
6	Tot-cholesterol	succinylcarnitine (C4-DC)	1100	TRUE	6.13265	-0.37373	-0.125035	-0.365174	0.505797	0.00160201	-0.00854779	5.43749e-91	0.149654	0.545538	0.0034432	0.030931	0.681895	0.204334	0.342026
536	Tot-cholesterol	sphingomyelin (d18:1/18:1, d18:2/18:0)	1123	TRUE	4.60664	0.798763	-0.123434	1.98715	-0.60503	-0.00525587	-0.027514	1.3219e-52	0.00718406	0.499397	3.52969e-41	0.0304282	0.132821	5.07506e-06	0.342026
176	HDL	1-myristoyl-2-palmitoyl-GPC (14:0/16:0)	1123	TRUE	2.1609	0.06637	-0.112694	0.228783	-0.128782	0.00693013	-0.0361337	9.24906e-61	0.370946	0.176759	1.46927e-13	0.0320815	1.30958e-05	1.80955e-40	0.348054
279	HDL	N-palmitoyl-sphingosine (d18:1/16:0)	1123	TRUE	2.32749	0.191278	-0.128208	0.101972	-0.251073	0.00671246	-0.0361986	9.33314e-61	0.149886	0.133127	0.0817848	0.0332345	3.9327e-05	8.40456e-39	0.351736
452	Tot-cholesterol	sphingomyelin (d18:2/23:0, d18:1/23:1, d17:1/24:1)*	1123	TRUE	3.12184	0.742962	0.0637761	2.49276	-0.525901	-0.00311746	0.00188784	1.34719e-27	0.005395	0.701707	1.3289e-91	0.0342928	0.324705	0.728324	0.351736
181	Tot-cholesterol	alpha-hydroxyisocaproate	1122	TRUE	6.05194	-0.331492	-0.226453	-0.0269023	0.437046	-0.000720415	-0.0135312	1.72633e-80	0.172402	0.254108	0.795069	0.0345747	0.849317	0.0367093	0.351736
305	Triglycerides	valine	1330	TRUE	-1.31705	0.454474	0.214481	0.488994	-0.362153	0.00340713	0.0269741	3.97935e-30	0.00741983	0.00484456	4.1282e-07	0.0348677	0.0105397	1.27218e-19	0.351736
532	HDL	1,2-dilinoleoyl-GPC (18:2/18:2)	1123	TRUE	1.7671	0.0866512	-0.108948	0.341569	-0.148721	0.00928834	-0.0311028	3.50882e-35	0.289187	0.18541	1.0749e-19	0.0363855	5.25078e-09	5.52058e-30	0.355758
282	HDL	stearoyl sphingomyelin (d18:1/18:0)	1123	TRUE	2.0743	0.208861	-0.109049	0.383318	-0.275876	0.00636931	-0.0370097	3.65987e-48	0.145114	0.196109	6.13971e-09	0.0365039	7.54174e-05	1.86723e-41	0.355758
411	Glucose	sphingomyelin (d18:1/24:1, d18:2/24:0)*	1177	TRUE	1.34746	-0.0860199	0.0184231	-0.0532509	0.066276	0.00211292	0.00705086	7.29866e-282	0.0147913	0.35994	0.000423381	0.0394889	8.8519e-07	4.94755e-23	0.358332
28	Glucose	1,5-anhydroglucitol (1,5-AG)	1205	TRUE	1.35925	-0.066621	0.0216426	-0.0594552	0.0509054	0.00177747	0.00744422	0	0.0101459	0.275681	1.37492e-06	0.0405071	2.79436e-05	2.37579e-26	0.358332
214	Tot-cholesterol	1-palmitoyl-2-oleoyl-GPI (16:0/18:1)*	1067	TRUE	6.13666	-0.250647	-0.252246	-0.171331	0.380544	-0.00102884	-0.0101604	1.98015e-81	0.223628	0.200924	0.0778285	0.0404404	0.790887	0.126615	0.358332
116	Tot-cholesterol	1-palmitoyl-2-arachidonoyl-GPC (16:0/20:4n6)	1123	TRUE	5.04778	0.73428	-0.222486	0.890024	-0.500243	-0.000433037	-0.0155986	1.89598e-54	0.00884075	0.252684	3.1188e-12	0.037808	0.907072	0.0137631	0.358332
35	LDL	isoleucine	1122	TRUE	3.74136	-0.529875	-0.198501	-0.0747194	0.714042	-0.00864936	0.00408074	4.13286e-32	0.151058	0.281166	0.691963	0.039523	0.013936	0.512565	0.358332
310	Glucose	palmitoyl-linoleoyl-glycerol (16:0/18:2) [2]*	1138	TRUE	1.29073	0.0135172	0.0247316	0.033409	-0.0294004	0.00192575	0.00619798	1.27564e-304	0.411822	0.228462	2.10863e-06	0.0396348	9.77378e-06	3.66769e-17	0.358332
52	Glucose	1-stearoyl-2-arachidonoyl-GPI (18:0/20:4)	1205	TRUE	1.28387	0.0498975	0.0229584	0.00992236	-0.0602757	0.0019232	0.00731663	9.66103e-266	0.139355	0.256947	0.488118	0.0426576	7.89926e-06	1.35524e-24	0.371638
248	HDL	1-palmitoyl-2-arachidonoyl-GPC (16:0/20:4n6)	1123	TRUE	2.05586	0.156145	-0.124999	0.351942	-0.208749	0.00696655	-0.0374769	9.6933e-49	0.196811	0.136259	1.62966e-10	0.0444981	1.34135e-05	7.75905e-43	0.37627
517	Tot-cholesterol	1-stearoyl-2-dihomo-linolenoyl-GPC (18:0/20:3n3 or 6)*	1123	TRUE	5.2839	0.632007	-0.287962	1.08259	-0.379633	-0.000965261	-0.0324132	9.91828e-72	0.00475614	0.126326	7.2665e-27	0.0443568	0.788131	3.47775e-07	0.37627
100	Triglycerides	2-methylbutyrylcarnitine (C5)	1327	TRUE	-1.0879	0.2537	0.190218	0.0773677	-0.147407	0.00456834	0.0310521	7.77547e-27	0.00189519	0.0136731	0.0503873	0.0468065	0.000744278	2.4021e-26	0.390054
67	HDL	ribonate	1122	TRUE	2.44491	0.0753838	-0.129447	-0.0965017	-0.15773	0.00762093	-0.0346164	3.06673e-77	0.398167	0.126968	0.0118217	0.0475154	2.8859e-06	2.97242e-35	0.390305
334	LDL	palmitoyl-linoleoyl-glycerol (16:0/18:2) [1]*	1052	TRUE	3.71692	0.0123585	-0.126115	-0.0521893	0.240943	-0.00908538	0.00529212	6.25583e-38	0.929426	0.509446	0.406261	0.0488797	0.012331	0.405852	0.390358
385	Glucose	alpha-ketoglutarate	1206	TRUE	1.29305	0.0189472	0.0257895	0.0385647	-0.0257976	0.00144331	0.00649713	0	0.347211	0.194876	1.44108e-07	0.0485528	0.000872436	6.24067e-20	0.390358
307	HDL	1-pentadecanoyl-2-linoleoyl-GPC (15:0/18:2)*	1123	TRUE	2.09071	0.0996733	-0.103467	0.295012	-0.173584	0.0065478	-0.0344193	1.5437e-52	0.307095	0.218659	6.30309e-11	0.0497825	4.28964e-05	4.55756e-36	0.392122
558	Triglycerides	1-oleoyl-2-dihomo-linolenoyl-GPC (18:1/20:3)*	1329	TRUE	-1.25797	0.226337	0.170822	0.356654	-0.119616	0.00392173	0.0279539	1.57494e-38	0.000742805	0.0188857	2.28801e-25	0.0510315	0.00164255	9.8961e-25	0.396529
13	LDL	mannitol/sorbitol	1123	TRUE	3.6603	0.117246	-0.158306	-0.023917	0.0445499	-0.00857143	0.00600739	2.28297e-39	0.169712	0.390712	0.0374138	0.0542257	0.0150658	0.319553	0.405899
451	LDL	palmitoyl-linoleoyl-glycerol (16:0/18:2) [2]*	1058	TRUE	3.73173	0.0111395	-0.0908586	0.185042	0.216973	-0.00864422	-0.00498811	7.47897e-40	0.933126	0.629234	0.00165687	0.0543282	0.0146552	0.422887	0.405899
570	LDL	glucose	1123	TRUE	4.15861	-0.681191	-0.180984	-0.606177	0.868094	-0.00827824	0.00827883	6.81578e-38	0.146081	0.324431	0.00285026	0.0543552	0.0184171	0.177675	0.405899
395	Triglycerides	palmitoyl-linoleoyl-glycerol (16:0/18:2) [1]*	1291	TRUE	-1.18306	0.160914	0.146163	0.412114	-0.0638289	0.0048615	0.0182164	4.42336e-53	0.000391258	0.0143085	1.18547e-114	0.0576506	1.41528e-06	4.56289e-16	0.424003
14	Glucose	1-palmitoyl-2-adrenoyl-GPC (16:0/22:4)*	1207	TRUE	1.30722	-0.0477627	0.0248282	-0.0114234	0.0263312	0.00197026	0.00724884	0	0.00923973	0.218927	0.136536	0.0582543	4.54671e-06	6.18078e-24	0.424003
311	Tot-cholesterol	sphingomyelin (d18:1/14:0, d16:1/16:0)*	1123	TRUE	3.76278	0.624272	-0.0126146	2.20478	-0.393646	-0.00463528	-0.00924817	4.42727e-44	0.00712811	0.938585	6.83466e-98	0.0610893	0.137556	0.0819822	0.43908
378	HDL	1-stearoyl-2-oleoyl-GPC (18:0/18:1)	1123	TRUE	2.08364	0.101207	-0.155892	0.308911	-0.165512	0.00721561	-0.036834	9.08108e-52	0.319551	0.0631212	6.09175e-11	0.0620105	6.49167e-06	2.17095e-41	0.440198
156	LDL	sphingomyelin (d18:2/24:1, d18:1/24:2)*	1123	TRUE	1.86424	0.704136	0.0252334	1.72772	-0.434925	-0.0124262	0.0107209	6.39239e-11	0.00589783	0.880802	1.36906e-43	0.0627935	0.000105753	0.0496703	0.44032
498	HDL	sphingomyelin (d18:1/17:0, d17:1/18:0, d19:1/16:0)	1123	TRUE	2.04721	0.12763	-0.0958249	0.376977	-0.198007	0.00566583	-0.0341849	8.60436e-50	0.294277	0.252486	2.36662e-12	0.0724892	0.000410006	8.46836e-36	0.453058
32	Triglycerides	alpha-hydroxyisocaproate	1327	TRUE	-1.13624	0.245762	0.204785	0.13086	-0.148478	0.00459383	0.030995	5.42184e-28	0.00376047	0.0078297	0.00280779	0.0723594	0.000565206	5.91319e-27	0.453058
549	Glucose	1-stearoyl-2-oleoyl-GPE (18:0/18:1)	1188	TRUE	1.26498	0.00736868	0.0153099	0.0432067	-0.0200843	0.00205882	0.00611995	0	0.64658	0.429514	7.50837e-17	0.0708297	8.07748e-07	4.97635e-18	0.453058
88	HDL	1-palmitoyl-2-linoleoyl-GPC (16:0/18:2)	1123	TRUE	1.58933	0.215802	-0.0887975	0.680934	-0.28995	0.00863652	-0.0349572	5.26725e-23	0.191392	0.284623	2.27669e-16	0.0704674	5.79927e-08	2.11882e-38	0.453058
482	Glucose	fumarate	1206	TRUE	1.24313	0.0410077	0.0255161	0.0725542	-0.0556419	0.00171878	0.00693209	1.10112e-268	0.206408	0.200435	2.47304e-06	0.0717235	5.89892e-05	6.90832e-23	0.453058
287	HDL	ribitol	1102	TRUE	2.48959	0.124887	-0.0910264	-0.0728849	-0.200378	0.00670616	-0.035307	4.14173e-76	0.294086	0.289101	0.167003	0.0689901	3.53102e-05	1.25057e-35	0.453058
440	Tot-cholesterol	1-myristoyl-2-linoleoyl-GPC (14:0/18:2)*	1123	TRUE	4.62109	0.501604	-0.163628	1.11264	-0.303731	0.00357177	-0.0160169	5.96359e-54	0.00824427	0.374622	1.17981e-35	0.0688349	0.310981	0.0074948	0.453058
197	Tot-cholesterol	glycerophosphorylcholine (GPC)	1123	TRUE	4.94528	0.565677	-0.178718	0.734669	-0.406267	0.00135719	-0.00608389	1.87688e-49	0.0199004	0.360033	6.22752e-11	0.0692707	0.716231	0.344402	0.453058
16	HDL	sphingomyelin (d18:2/23:0, d18:1/23:1, d17:1/24:1)*	1123	TRUE	1.69796	0.155917	-0.056835	0.640296	-0.220682	0.00624143	-0.0327726	6.97582e-34	0.231586	0.484386	1.23052e-26	0.0688131	5.37298e-05	4.75425e-35	0.453058
155	Tot-cholesterol	ribitol	1102	TRUE	6.38586	-0.329586	-0.148556	-0.478087	0.472317	-0.000497294	-0.00910361	3.55298e-91	0.236398	0.459427	0.000106237	0.0668228	0.895642	0.169494	0.453058
237	Glucose	isobutyrylcarnitine (C4)	1203	TRUE	1.28473	0.00781282	0.0211111	0.0195173	-0.0211659	0.00182873	0.00708063	3.83176e-307	0.629813	0.296698	0.00285564	0.0736567	2.39183e-05	3.13081e-23	0.455404
564	HDL	3-hydroxyisobutyrate	1105	TRUE	2.40667	-0.195581	-0.129988	0.0514037	0.0816726	0.00639718	-0.0368409	1.57065e-74	0.00404973	0.138876	0.0563437	0.0758701	9.76892e-05	3.7123e-40	0.463761
448	LDL	alpha-hydroxyisovalerate	1123	TRUE	3.65666	-0.0708263	-0.187716	-0.00713608	0.267465	-0.00890115	0.0052347	9.77138e-37	0.689785	0.307915	0.91986	0.0766215	0.0114348	0.383773	0.463761
91	LDL	mannose	1123	TRUE	3.84158	-0.230713	-0.187984	-0.274297	0.397735	-0.0086789	0.00905337	6.98094e-41	0.381615	0.306643	0.0123855	0.0775877	0.0134223	0.14723	0.464718
444	Tot-cholesterol	malate	1064	TRUE	6.16048	-0.139117	-0.261632	-0.347716	0.299251	0.00193788	-0.0113251	1.42449e-87	0.4585	0.19445	2.03156e-05	0.0787404	0.620766	0.0928909	0.46676
347	Tot-cholesterol	1-margaroyl-2-oleoyl-GPC (17:0/18:1)*	1123	TRUE	4.53224	0.578964	-0.321155	1.40024	-0.385044	-0.00709782	0.000700211	2.65781e-50	0.0190939	0.0824792	3.38074e-35	0.0795927	0.0458564	0.908516	0.466998
98	Tot-cholesterol	sphinganine-1-phosphate	1002	TRUE	5.86116	-0.288218	-0.0843745	0.207791	0.419601	-2.78621e-05	-0.0160441	8.72307e-69	0.26311	0.688768	0.0818588	0.0813058	0.994436	0.0180128	0.472231
75	Glucose	1-stearoyl-2-docosahexaenoyl-GPE (18:0/22:6)*	1207	TRUE	1.28419	0.010814	0.0186989	0.0315697	-0.0228398	0.0016347	0.00695576	0	0.561496	0.349016	1.54602e-06	0.084844	0.000142537	5.68813e-23	0.487853
23	Tot-cholesterol	glucose	1123	TRUE	6.55023	-0.703125	-0.223564	-0.649201	0.834659	0.000237226	-0.0103033	1.27435e-78	0.164669	0.259571	0.00308969	0.0866396	0.950109	0.120248	0.489924
137	Tot-cholesterol	1-oleoyl-2-dihomo-linolenoyl-GPC (18:1/20:3)*	1122	TRUE	5.74696	0.46196	-0.257711	0.480959	-0.267432	-0.00235766	-0.0194945	4.36781e-81	0.0138093	0.188939	1.96686e-08	0.0874903	0.529666	0.00258732	0.489924
472	Tot-cholesterol	palmitoyl-linoleoyl-glycerol (16:0/18:2) [2]*	1058	TRUE	6.01051	-0.0279324	-0.14218	0.18721	0.207822	0.000299366	-0.0224506	4.25568e-86	0.845826	0.485077	0.00326649	0.0885295	0.937732	0.000856976	0.489924
159	HDL	mannitol/sorbitol	1123	TRUE	2.44059	-0.12366	-0.116372	-0.0100343	0.0182885	0.00711507	-0.0364315	2.40373e-79	0.00180521	0.173979	0.0599153	0.0886124	1.37566e-05	1.12146e-38	0.489924
96	Tot-cholesterol	1-oleoyl-2-docosahexaenoyl-GPC (18:1/22:6)*	1123	TRUE	5.01677	0.501115	-0.262309	0.821662	-0.33642	-0.00470982	0.00130732	1.02044e-55	0.0253233	0.175351	1.75897e-14	0.0899366	0.206959	0.842113	0.49251
12	LDL	1-stearoyl-2-arachidonoyl-GPC (18:0/20:4)	1123	TRUE	3.34517	0.613702	-0.201416	0.291244	-0.334294	-0.00951795	0.00508336	1.8594e-29	0.0110193	0.273223	0.00435303	0.0917263	0.00663637	0.395392	0.497572
295	LDL	1-stearoyl-2-linoleoyl-GPC (18:0/18:2)*	1123	TRUE	1.21518	0.733588	-0.158515	1.86586	-0.473741	-0.00405115	0.0116249	0.00011298	0.014773	0.350682	1.30239e-38	0.0940869	0.213629	0.035796	0.500926
491	Glucose	3-hydroxy-2-ethylpropionate	1206	TRUE	1.27899	0.0271198	0.0231855	0.0158135	-0.0385958	0.00193988	0.00720283	5.48852e-287	0.321658	0.250755	0.164375	0.0933104	7.2165e-06	4.91603e-24	0.500926
136	Triglycerides	3-hydroxy-2-ethylpropionate	1330	TRUE	-1.09189	0.241397	0.191403	-0.0263582	-0.143449	0.00581183	0.0326027	5.43528e-26	0.00698697	0.013463	0.57473	0.0956059	2.70116e-05	3.80416e-29	0.504343
548	Tot-cholesterol	1-stearoyl-2-linoleoyl-GPI (18:0/18:2)	1115	TRUE	6.11765	-0.233315	-0.21894	-0.116036	0.399385	-0.000495757	-0.0134529	2.87928e-69	0.349547	0.279967	0.378819	0.0971729	0.898443	0.0381575	0.507949
329	Tot-cholesterol	2-methylcitrate/homocitrate	1021	TRUE	6.4293	-0.182004	-0.0699172	-0.252178	0.357873	-0.00208762	-0.0164771	4.14082e-85	0.414177	0.753218	0.0339449	0.101902	0.603077	0.0166922	0.527766
7	LDL	1-palmitoyl-2-oleoyl-GPI (16:0/18:1)*	1067	TRUE	3.75482	-0.0786087	-0.192218	-0.0839033	0.281202	-0.00983966	0.00681659	2.14938e-36	0.680914	0.29373	0.352096	0.1028	0.00630018	0.269566	0.527766
488	Tot-cholesterol	arabonate/xylonate	1123	TRUE	6.06556	-0.136645	-0.219017	-0.0288616	0.278752	-0.000795235	-0.0138599	7.7769e-86	0.48965	0.270795	0.737334	0.103854	0.834228	0.0322887	0.52846
110	Tot-cholesterol	mannose	1123	TRUE	6.24742	-0.278964	-0.228288	-0.362994	0.392106	-5.16881e-05	-0.00826272	1.05446e-90	0.326503	0.249539	0.00214257	0.106571	0.989102	0.219862	0.537204
236	Glucose	oleoyl-linoleoyl-glycerol (18:1/18:2) [1]	1205	TRUE	1.28233	0.00923831	0.0218403	0.0278948	-0.0240868	0.00185338	0.00683073	0	0.620591	0.27508	0.00021982	0.108302	1.36431e-05	1.2781e-21	0.537204
474	HDL	sphingomyelin (d18:2/24:1, d18:1/24:2)*	1123	TRUE	1.84274	0.119866	-0.0598564	0.573579	-0.183028	0.0058043	-0.034906	4.90049e-40	0.336508	0.465783	4.32331e-21	0.108375	0.000204579	3.13494e-39	0.537204
341	Tot-cholesterol	glycerate	1123	TRUE	6.04178	0.547404	-0.226531	-0.0045211	-0.421828	-0.000838118	-0.0138718	8.05916e-69	0.0303695	0.254299	0.972538	0.10937	0.826313	0.0328385	0.5375
455	Triglycerides	N-acetylisoleucine	1322	TRUE	-1.18282	0.229752	0.203888	0.22828	-0.126294	0.00417263	0.0296707	1.13e-30	0.00758962	0.00690663	2.46773e-07	0.111501	0.00128597	1.11493e-24	0.53844
256	LDL	malate	1064	TRUE	3.80178	-0.047288	-0.219077	-0.3129	0.250076	-0.00739075	0.00831689	7.61638e-40	0.7857	0.240995	3.51317e-05	0.112886	0.0417352	0.183023	0.53844
495	LDL	1-stearoyl-2-dihomo-linolenoyl-GPC (18:0/20:3n3 or 6)*	1123	TRUE	3.12484	0.567224	-0.22825	0.781583	-0.283591	-0.00936732	-0.00803249	5.19263e-29	0.00749961	0.200961	2.96291e-16	0.11296	0.005924	0.18267	0.53844
164	LDL	1-pentadecanoyl-2-linoleoyl-GPC (15:0/18:2)*	1123	TRUE	2.44766	0.523738	-0.0742353	1.02279	-0.290398	-0.0104892	0.0137339	6.91528e-18	0.00961795	0.670241	7.975e-28	0.113306	0.00156617	0.0157794	0.53844
316	LDL	succinate	1123	TRUE	3.73396	-0.196832	-0.189872	-0.0851598	0.449364	-0.0090962	0.00543652	3.2661e-33	0.468036	0.302507	0.554586	0.114992	0.0097693	0.364599	0.541971
267	Glucose	3-methyl-2-oxovalerate	1207	TRUE	1.25789	0.0184616	0.0260321	0.0382487	-0.0262393	0.00178136	0.00710755	1.47034e-289	0.442717	0.191848	5.64045e-06	0.117169	2.8007e-05	3.84818e-24	0.544426
468	Tot-cholesterol	alpha-hydroxyisovalerate	1123	TRUE	5.87591	-0.106849	-0.240905	0.118414	0.254688	6.32019e-05	-0.0148952	1.27763e-79	0.576016	0.224359	0.120906	0.117407	0.986694	0.0213606	0.544426
527	LDL	1-palmitoyl-2-palmitoleoyl-GPC (16:0/16:1)*	1123	TRUE	3.56342	-0.0143491	-0.180748	0.152772	0.203242	-0.00893013	0.00171965	2.65975e-36	0.931292	0.323664	0.0186469	0.12087	0.010579	0.775973	0.547246
504	Glucose	oleoyl-linoleoyl-glycerol (18:1/18:2) [2]	1206	TRUE	1.28152	0.00862083	0.0211876	0.0249337	-0.0236075	0.00190018	0.00688065	0	0.647445	0.291431	0.000981963	0.120641	8.632e-06	6.87362e-22	0.547246
450	HDL	4-methyl-2-oxopentanoate	1123	TRUE	2.32707	-0.209785	-0.132287	0.0861149	0.0924374	0.00659792	-0.0363075	6.16373e-68	0.0178432	0.119334	0.00505681	0.120776	4.5549e-05	1.258e-39	0.547246
26	HDL	behenoyl sphingomyelin (d18:1/22:0)*	1096	TRUE	2.05618	0.148835	-0.111805	0.309811	-0.220329	0.00786915	-0.0366565	7.7226e-42	0.31839	0.187617	1.33516e-06	0.122679	1.76822e-06	8.74139e-40	0.551099
185	Glucose	palmitoyl-linoleoyl-glycerol (16:0/18:2) [1]*	1129	TRUE	1.29317	0.00946983	0.0268631	0.03903	-0.024963	0.00181165	0.00618627	6.98322e-302	0.596144	0.191394	8.53096e-08	0.124606	3.60148e-05	8.01292e-17	0.555414
464	LDL	sphinganine-1-phosphate	1002	TRUE	3.57915	-0.142553	-0.0845952	0.154222	0.34373	-0.00965243	0.00427683	1.71524e-30	0.55287	0.66694	0.164735	0.125595	0.00962947	0.499302	0.555517
126	LDL	2-methylcitrate/homocitrate	1021	TRUE	3.97728	-0.0836348	-0.0789165	-0.207376	0.309792	-0.0106987	0.00466148	9.42751e-39	0.686286	0.702444	0.0606238	0.127509	0.00412897	0.466073	0.559677
541	Glucose	2-methylcitrate/homocitrate	1105	TRUE	1.24192	0.0191736	0.0308265	0.0758945	-0.0371511	0.00164397	0.00722796	4.88895e-254	0.440115	0.162551	7.1361e-10	0.129672	0.000238642	2.88023e-22	0.56486
71	Glucose	2-methylbutyrylcarnitine (C5)	1201	TRUE	1.28399	0.017024	0.0183625	0.0520352	-0.0309724	0.00158483	0.00636365	0	0.48174	0.357963	4.31948e-07	0.130952	0.000237783	1.64753e-18	0.566147
528	LDL	phosphatidylcholine (16:0/22:5n3, 18:1/20:4)*	1123	TRUE	2.65746	0.646985	-0.205955	0.873422	-0.387811	-0.0107242	0.0104539	3.07368e-17	0.0275706	0.2545	1.88903e-10	0.133032	0.00191273	0.0772895	0.570848
363	LDL	3-methyl-2-oxobutyrate	1123	TRUE	3.66076	0.465435	-0.173626	-0.0582542	-0.171404	-0.00829758	0.00655035	1.83244e-38	0.0118193	0.3458	0.334229	0.14733	0.018946	0.274819	0.575031
534	Triglycerides	1-palmitoyl-2-linoleoyl-GPI (16:0/18:2)	1291	TRUE	-1.34086	-0.0128018	0.236554	0.334639	0.101998	0.00577014	0.0273338	8.14843e-41	0.873854	0.000975202	2.87746e-21	0.152008	3.5276e-06	5.34728e-24	0.575031
73	LDL	lactate	1123	TRUE	3.83327	-0.153658	-0.185767	-0.246631	0.386791	-0.00901079	0.00753088	7.44234e-39	0.562122	0.312885	0.0697097	0.151887	0.0103278	0.217188	0.575031
481	Tot-cholesterol	sphingomyelin (d17:1/16:0, d18:1/15:0, d16:1/17:0)*	1123	TRUE	3.67771	0.513719	0.0040543	2.14331	-0.316572	-0.00646855	0.0022565	1.13211e-40	0.0331861	0.980513	2.97425e-91	0.151742	0.0412631	0.677722	0.575031
470	Glucose	1-palmitoyl-2-oleoyl-GPE (16:0/18:1)	1157	TRUE	1.28592	0.0034211	0.0233474	0.0293851	-0.0152604	0.00189183	0.00630331	1.09874e-300	0.828316	0.247299	2.77561e-08	0.150762	1.45648e-05	7.91167e-18	0.575031
179	LDL	glycerophosphorylcholine (GPC)	1123	TRUE	2.76952	0.513068	-0.14411	0.604927	-0.299459	-0.00745395	0.0117353	5.46486e-19	0.0231922	0.427467	7.21678e-09	0.149997	0.0318442	0.049928	0.575031
112	Tot-cholesterol	1-palmitoyl-2-linoleoyl-GPI (16:0/18:2)	1066	TRUE	5.70706	-0.117711	-0.169891	0.257554	0.254445	0.00185267	-0.0181146	7.68756e-72	0.55609	0.382946	0.00811215	0.149882	0.62821	0.00583083	0.575031
186	Glucose	1-palmitoyl-2-docosahexaenoyl-GPE (16:0/22:6)*	1207	TRUE	1.27546	0.00844078	0.0203394	0.0251248	-0.021742	0.00176487	0.00732548	7.94067e-302	0.675114	0.311944	0.00113723	0.147218	4.42264e-05	3.76155e-25	0.575031
150	Glucose	ethylmalonate	1206	TRUE	1.28656	0.00723195	0.023382	0.0074068	-0.0191761	0.00192602	0.00726505	2.01148e-306	0.692792	0.24743	0.181649	0.149296	7.72064e-06	1.97895e-24	0.575031
142	HDL	1-palmitoyl-2-oleoyl-GPC (16:0/18:1)	1123	TRUE	1.9366	0.109442	-0.142283	0.468338	-0.180656	0.00714905	-0.0371177	1.1931e-42	0.418739	0.0870107	1.30302e-14	0.144668	6.46706e-06	7.03011e-43	0.575031
168	LDL	phosphate	1123	TRUE	3.72402	-0.995587	-0.18863	-0.0725095	1.21535	-0.00930265	0.00606248	2.49207e-14	0.221824	0.305839	0.854979	0.135688	0.00822212	0.311708	0.575031
132	LDL	1-stearoyl-2-oleoyl-GPE (18:0/18:1)	1108	TRUE	3.69531	0.0297306	-0.193159	-0.0202925	0.140252	-0.00892807	0.00480071	8.77164e-39	0.831215	0.295173	0.653044	0.137791	0.0118522	0.440034	0.575031
221	Glucose	trimethylamine N-oxide	1207	TRUE	1.28527	-0.00234209	0.024869	0.00964307	-0.0103535	0.00188375	0.00727364	0	0.85882	0.217437	0.0170993	0.140117	1.18033e-05	1.03124e-24	0.575031
296	HDL	phosphatidylcholine (16:0/22:5n3, 18:1/20:4)*	1123	TRUE	1.90925	0.111023	-0.138716	0.464751	-0.174709	0.00600977	-0.0340219	1.27181e-39	0.411669	0.0956275	1.84237e-13	0.141707	0.000159208	9.14358e-36	0.575031
90	Tot-cholesterol	lactate	1123	TRUE	6.19435	-0.243835	-0.229105	-0.243233	0.423914	-0.000557506	-0.0115762	7.84303e-85	0.39402	0.248994	0.097259	0.145713	0.883144	0.0788193	0.575031
493	HDL	glycerophosphorylcholine (GPC)	1123	TRUE	2.22661	0.0625563	-0.117831	0.149922	-0.143033	0.00723698	-0.035243	1.66454e-52	0.555353	0.166848	0.00224964	0.142932	8.99865e-06	4.23929e-36	0.575031
344	Triglycerides	sphingomyelin (d18:1/20:1, d18:2/20:0)*	1330	TRUE	-1.00967	-0.0828106	0.204126	-0.0438639	0.175879	0.00511111	0.0316945	7.20245e-18	0.520023	0.00840402	0.498712	0.142227	0.000108985	5.73645e-28	0.575031
62	Glucose	1,2-dilinoleoyl-GPC (18:2/18:2)	1207	TRUE	1.30877	-0.0462496	0.0235244	-0.0095546	0.0283362	0.00194045	0.00714149	5.96345e-249	0.0333977	0.244167	0.338282	0.144264	8.65729e-06	9.95508e-23	0.575031
106	HDL	1-palmitoyl-2-palmitoleoyl-GPC (16:0/16:1)*	1123	TRUE	2.26375	0.0202581	-0.122744	0.207164	-0.0850914	0.00707841	-0.0397223	9.2944e-69	0.789558	0.141698	2.66498e-12	0.154487	8.88845e-06	4.33858e-47	0.58059
172	HDL	3-methyl-2-oxovalerate	1123	TRUE	2.3799	-0.210883	-0.133877	0.058025	0.0958807	0.0066735	-0.036905	1.04914e-70	0.0289943	0.116717	0.0931489	0.156632	4.09192e-05	1.82149e-40	0.584827
523	Tot-cholesterol	palmitoyl-linoleoyl-glycerol (16:0/18:2) [1]*	1052	TRUE	6.03337	0.0270799	-0.177454	-0.0979014	0.186114	-0.000715925	-0.0106067	1.43583e-83	0.857274	0.389659	0.148811	0.158556	0.85498	0.122567	0.588193
524	LDL	1-stearoyl-2-linoleoyl-GPI (18:0/18:2)	1115	TRUE	3.45638	-0.095764	-0.145469	0.101458	0.312946	-0.0076739	0.00577975	5.93777e-27	0.677978	0.437559	0.405372	0.159873	0.0326372	0.335464	0.589276
190	LDL	sphingomyelin (d18:1/17:0, d17:1/18:0, d19:1/16:0)	1123	TRUE	1.94077	0.53479	-0.0217358	1.66467	-0.302641	-0.0149431	0.0168773	6.96994e-13	0.0248658	0.89458	2.86991e-56	0.16109	1.95859e-06	0.00164392	0.589981
198	Triglycerides	glycerate	1330	TRUE	-1.00662	0.266863	0.200778	-0.0327931	-0.161871	0.00506307	0.0312455	3.41911e-16	0.0305052	0.00957553	0.597421	0.163064	0.000128491	4.40622e-27	0.590884
340	HDL	1-stearoyl-2-arachidonoyl-GPC (18:0/20:4)	1123	TRUE	2.23734	0.0711178	-0.140865	0.194889	-0.127582	0.00660773	-0.0371364	7.42755e-60	0.52364	0.0971314	3.61708e-05	0.163527	4.50642e-05	3.46223e-41	0.590884
265	Glucose	1-palmitoyl-2-docosahexaenoyl-GPC (16:0/22:6)	1207	TRUE	1.29958	0.0173618	0.0222418	-0.00445813	-0.0297155	0.00203752	0.00705843	1.1331e-281	0.498011	0.270467	0.686693	0.16442	2.60495e-06	2.16032e-22	0.590884
65	HDL	succinate	1123	TRUE	2.46885	0.0850334	-0.127114	-0.033799	-0.181968	0.0067464	-0.0362881	9.86441e-66	0.498909	0.136517	0.612958	0.16861	3.57134e-05	6.09178e-39	0.602178
419	Tot-cholesterol	1,2-dilinoleoyl-GPC (18:2/18:2)	1123	TRUE	4.02714	0.429757	-0.167149	0.986025	-0.219549	0.00692096	0.00285093	7.23341e-36	0.0197781	0.368529	1.27099e-31	0.170596	0.0541544	0.644171	0.605511
36	Glucose	citrate	1207	TRUE	1.30799	0.0262581	0.026059	-0.0251554	-0.0365818	0.00221858	0.00716145	2.69064e-299	0.404211	0.195763	0.0675906	0.172184	4.13098e-07	5.17743e-24	0.606826
80	Glucose	palmitoyl dihydrosphingomyelin (d18:0/16:0)*	1207	TRUE	1.35656	-0.0611542	0.0188933	-0.0470478	0.0423609	0.00191036	0.00689435	3.1472e-265	0.0710047	0.348411	0.00203349	0.173077	7.83539e-06	5.40645e-22	0.606826
131	Glucose	sphingomyelin (d18:1/20:1, d18:2/20:0)*	1207	TRUE	1.38368	-0.0636885	0.0218837	-0.0876492	0.0462639	0.00193221	0.00731545	2.71968e-290	0.0770107	0.271482	1.07783e-06	0.178585	4.89779e-06	1.4174e-25	0.611227
490	LDL	ribonate	1122	TRUE	3.74289	-0.0348879	-0.181915	-0.0768898	0.232787	-0.00907197	0.005271	2.37072e-39	0.856986	0.322929	0.355266	0.17769	0.0102615	0.384592	0.611227
320	Tot-cholesterol	ethylmalonate	1123	TRUE	5.90671	0.363371	-0.243415	0.0990765	-0.159588	-0.000931392	-0.0135059	3.86968e-84	0.0261222	0.220928	0.0497468	0.17628	0.806026	0.0368353	0.611227
53	Triglycerides	1-palmitoyl-2-arachidonoyl-GPI (16:0/20:4)*	1285	TRUE	-1.16097	0.00325578	0.248306	0.425706	0.0913662	0.0026466	0.0240449	6.60742e-35	0.964464	0.000676573	1.21175e-36	0.177249	0.0284636	7.66992e-20	0.611227
306	LDL	sphingomyelin (d18:1/21:0, d17:1/22:0, d16:1/23:0)*	1123	TRUE	1.75514	0.545836	-0.0795038	1.54008	-0.289934	-0.00841318	0.0131052	3.36286e-10	0.0217354	0.63236	2.03242e-49	0.18062	0.00789134	0.0155094	0.614537
260	Glucose	N-acetylisoleucine	1192	TRUE	1.26486	0.0162927	0.0246493	0.0563313	-0.0321543	0.0018127	0.00657183	9.18536e-288	0.518751	0.21099	4.44835e-06	0.183443	1.83167e-05	1.43515e-20	0.620467
380	HDL	1-stearoyl-2-docosahexaenoyl-GPE (18:0/22:6)*	1123	TRUE	2.42659	0.00732307	-0.12237	-0.0406991	-0.0688967	0.00752362	-0.0358131	6.01431e-78	0.920235	0.151748	0.118373	0.185284	4.7166e-06	7.18608e-38	0.620885
489	Glucose	lactate	1207	TRUE	1.22092	0.0251066	0.0258742	0.1134	-0.0404765	0.00190458	0.00595858	1.27223e-277	0.406429	0.182336	1.37286e-14	0.185726	3.96178e-06	1.47623e-17	0.620885
44	HDL	sphingomyelin (d17:1/16:0, d18:1/15:0, d16:1/17:0)*	1123	TRUE	1.97374	0.067893	-0.0847463	0.42525	-0.139438	0.00575935	-0.0335483	1.53907e-46	0.573738	0.307485	9.89837e-16	0.207034	0.000281866	5.02191e-35	0.625326
152	Tot-cholesterol	1-palmitoyl-2-stearoyl-GPC (16:0/18:0)	1123	TRUE	2.93184	0.467476	-0.175108	2.39148	-0.280076	0.000338428	0.00680615	3.80533e-24	0.0531746	0.286307	1.94948e-90	0.216417	0.913927	0.209151	0.625326
141	Glucose	1-stearoyl-2-linoleoyl-GPC (18:0/18:2)*	1207	TRUE	1.31389	-0.0648145	0.0241171	-0.0157702	0.0468109	0.00193526	0.00719205	2.18733e-223	0.0960634	0.23284	0.38612	0.207364	7.74947e-06	6.8837e-24	0.625326
154	Tot-cholesterol	1-stearoyl-2-oleoyl-GPE (18:0/18:1)	1108	TRUE	6.01429	-0.0117678	-0.258811	0.0713664	0.128251	-0.000230818	-0.0175059	3.41985e-86	0.937591	0.192976	0.142332	0.207849	0.951845	0.00896239	0.625326
292	LDL	sphingomyelin (d18:1/14:0, d16:1/16:0)*	1123	TRUE	1.8733	0.528153	-0.0120267	1.74877	-0.260376	-0.0123995	0.00898881	1.79325e-12	0.0206883	0.940441	6.82247e-64	0.208098	5.35678e-05	0.0855726	0.625326
196	Tot-cholesterol	1-margaroyl-2-linoleoyl-GPC (17:0/18:2)*	1123	TRUE	3.82313	0.486524	-0.134547	1.59345	-0.290403	-0.00258068	0.00987022	3.76995e-34	0.0543289	0.459082	2.237e-43	0.210026	0.456176	0.105444	0.625326
38	Tot-cholesterol	1-palmitoyl-2-docosahexaenoyl-GPC (16:0/22:6)	1123	TRUE	4.76284	0.396759	-0.163186	1.06942	-0.223022	-0.00650359	0.00227039	4.10143e-56	0.0651492	0.381257	1.60389e-30	0.213983	0.0697548	0.713446	0.625326
24	Glucose	glycerophosphorylcholine (GPC)	1207	TRUE	1.38752	-0.0470734	0.0190098	-0.0605789	0.0304622	0.00173092	0.00661816	3.07885e-293	0.0766868	0.339961	9.2878e-07	0.212289	4.78671e-05	1.07477e-20	0.625326
301	LDL	ethylmalonate	1123	TRUE	3.56751	0.388369	-0.196204	0.0770547	-0.135838	-0.00932828	0.0055754	9.25712e-37	0.0103203	0.287084	0.0996758	0.214277	0.00797338	0.35252	0.625326
276	HDL	fructose	1123	TRUE	2.56382	0.0500596	-0.121119	-0.147924	-0.13008	0.00675944	-0.0353732	1.23351e-77	0.653737	0.154143	0.00741642	0.214565	3.01161e-05	3.18478e-37	0.625326
459	Glucose	1-stearoyl-2-oleoyl-GPC (18:0/18:1)	1207	TRUE	1.29134	-0.0484005	0.0231594	0.00314486	0.029412	0.00198571	0.00717409	9.28399e-266	0.0732634	0.252232	0.80178	0.215938	4.03809e-06	7.0636e-24	0.625326
531	Triglycerides	mannose	1330	TRUE	-1.09036	0.225338	0.197758	0.00962069	-0.128059	0.0052676	0.0323561	9.41625e-26	0.0309289	0.0107542	0.842384	0.212164	0.000100183	2.00752e-26	0.625326
492	HDL	1-margaroyl-2-linoleoyl-GPC (17:0/18:2)*	1123	TRUE	1.85932	0.0627829	-0.105542	0.42368	-0.13357	0.00638305	-0.030599	1.6332e-38	0.58663	0.203431	9.32486e-16	0.206794	5.44486e-05	4.3055e-28	0.625326
0	Glucose	1-stearoyl-2-arachidonoyl-GPE (18:0/20:4)	1207	TRUE	1.27048	0.00731782	0.0180297	0.0370198	-0.0200865	0.00181698	0.00680488	4.50972e-306	0.72784	0.365673	2.97012e-06	0.204395	1.81012e-05	5.77584e-22	0.625326
201	Tot-cholesterol	1-palmitoyl-2-arachidonoyl-GPI (16:0/20:4)*	1053	TRUE	5.58152	-0.108773	-0.12574	0.335081	0.217946	0.00278695	-0.0185604	2.35151e-69	0.606398	0.562239	0.000242286	0.205522	0.472373	0.0052724	0.625326
522	HDL	isobutyrylcarnitine (C4)	1119	TRUE	2.46467	-0.146194	-0.117131	-0.0624315	0.0563046	0.00739496	-0.0361715	9.41087e-81	0.0181574	0.167918	0.0110471	0.206169	5.62476e-06	4.86153e-39	0.625326
544	Triglycerides	sphingomyelin (d18:2/14:0, d18:1/14:1)*	1318	TRUE	-1.01461	-0.0232775	0.211133	0.0312489	0.122092	0.00451506	0.0301879	7.13274e-22	0.814648	0.00750234	0.555614	0.189531	0.00112299	2.06704e-23	0.625326
270	HDL	1-stearoyl-2-dihomo-linolenoyl-GPC (18:0/20:3n3 or 6)*	1123	TRUE	2.38538	0.0448908	-0.131248	0.0570703	-0.11215	0.00683797	-0.0370195	4.79114e-71	0.65853	0.124597	0.212522	0.190495	2.72212e-05	1.16517e-37	0.625326
565	LDL	1-palmitoyl-2-arachidonoyl-GPI (16:0/20:4)*	1053	TRUE	3.31229	-0.0389398	-0.0887434	0.209643	0.210045	-0.0057272	0.00215006	4.90788e-29	0.843481	0.661461	0.0139621	0.191452	0.113904	0.72939	0.625326
348	Tot-cholesterol	leucine	1122	TRUE	6.01925	-0.451434	-0.244	0.00118038	0.600483	-0.000358423	-0.014353	1.09505e-58	0.343506	0.220863	0.996196	0.193059	0.924822	0.0305986	0.625326
51	Glucose	1-stearoyl-2-docosapentaenoyl-GPC (18:0/22:5n3)*	1207	TRUE	1.30066	-0.0525008	0.0227062	-0.00372522	0.0300632	0.00194931	0.00720757	4.3847e-289	0.0677214	0.262201	0.735274	0.194053	6.42116e-06	4.28771e-24	0.625326
253	LDL	choline	1123	TRUE	3.37806	-0.312192	-0.18781	0.323977	0.537243	-0.0096023	0.00533407	3.96014e-25	0.452393	0.306768	0.109328	0.20194	0.00621669	0.373016	0.625326
95	Tot-cholesterol	3-hydroxy-2-ethylpropionate	1123	TRUE	6.0291	-0.143581	-0.231195	0.0273831	0.269169	-0.00125184	-0.0137286	7.69444e-83	0.561964	0.244965	0.796507	0.198085	0.743017	0.0341775	0.625326
467	Tot-cholesterol	behenoyl sphingomyelin (d18:1/22:0)*	1096	TRUE	2.74801	0.581278	-0.0374854	2.49594	-0.364909	0.00881609	-0.0101475	6.35233e-20	0.0492093	0.823581	4.28336e-86	0.196927	0.00690316	0.0651441	0.625326
512	LDL	stearoyl sphingomyelin (d18:1/18:0)	1123	TRUE	1.89222	0.560255	-0.051668	1.93205	-0.329728	-0.0121135	0.00180987	1.2001e-11	0.0463572	0.75489	1.97777e-50	0.202655	0.000124358	0.736736	0.625326
513	LDL	sphingomyelin (d18:1/20:0, d16:1/22:0)*	1092	TRUE	1.17644	0.58963	-0.10398	2.06014	-0.32635	-0.00686193	0.0106029	3.0517e-05	0.033554	0.518284	2.80394e-66	0.203404	0.0270758	0.0479187	0.625326
431	HDL	sphingomyelin (d18:1/14:0, d16:1/16:0)*	1123	TRUE	1.93472	0.0687975	-0.0815254	0.491884	-0.133546	0.00598817	-0.0356252	2.47324e-46	0.554143	0.320146	1.19579e-20	0.20504	0.000128545	8.49735e-41	0.625326
420	LDL	palmitoyl dihydrosphingomyelin (d18:0/16:0)*	1123	TRUE	1.10721	0.496109	0.100358	1.98339	-0.278633	-0.00833531	0.0205796	7.35694e-05	0.04499	0.529448	3.0043e-70	0.218914	0.00598431	8.17819e-05	0.629377
10	Triglycerides	ribitol	1314	TRUE	-1.18616	-0.03665	0.196432	0.230717	0.13444	0.00474965	0.0283284	7.97443e-30	0.751749	0.00978156	5.31057e-06	0.220779	0.00023407	8.46018e-23	0.631583
146	LDL	1-palmitoyl-2-linoleoyl-GPE (16:0/18:2)	1123	TRUE	3.59075	0.0496929	-0.182454	0.0679307	0.141446	-0.00862404	0.00375871	9.05213e-37	0.745074	0.321164	0.241158	0.224252	0.0141177	0.533343	0.635859
337	HDL	citrate	1123	TRUE	2.36369	-0.231634	-0.138615	0.129143	0.125531	0.00560098	-0.0360966	5.47694e-69	0.0554364	0.103279	0.0152622	0.225502	0.000739757	7.67574e-39	0.635859
63	Tot-cholesterol	1-stearoyl-2-oleoyl-GPC (18:0/18:1)	1123	TRUE	4.59361	0.433617	-0.342942	1.2472	-0.236412	0.0011056	-0.0156445	7.79984e-52	0.0528878	0.0634993	4.19239e-33	0.226296	0.753754	0.00936829	0.635859
388	Glucose	1-palmitoyl-2-palmitoleoyl-GPC (16:0/16:1)*	1207	TRUE	1.29767	-0.0387563	0.0236599	-0.000179521	0.0190373	0.00195519	0.00714537	1.19451e-302	0.0536274	0.24153	0.981836	0.228592	5.50869e-06	2.91543e-23	0.635859
357	Tot-cholesterol	1-palmitoyl-2-docosahexaenoyl-GPE (16:0/22:6)*	1123	TRUE	5.78885	0.347301	-0.268512	0.277034	-0.163851	-0.00267223	-0.0124372	1.10068e-80	0.0574022	0.174764	9.06667e-05	0.228988	0.482641	0.0529665	0.635859
121	HDL	trimethylamine N-oxide	1123	TRUE	2.45955	-0.129011	-0.131791	-0.0195228	0.0320099	0.00695187	-0.0365639	6.39648e-80	0.0108724	0.123285	0.2034	0.230297	2.10457e-05	1.39258e-39	0.635859
37	HDL	sphingosine	1042	TRUE	2.46793	-0.171155	-0.146149	-0.132711	0.082508	0.00797143	-0.0351533	2.12167e-75	0.0240551	0.0945418	4.14917e-05	0.231121	2.152e-06	2.40328e-35	0.635859
243	HDL	mannose	1123	TRUE	2.45543	0.0609951	-0.122617	-0.0663219	-0.126195	0.00701802	-0.0347909	6.21474e-76	0.618193	0.15077	0.192579	0.227597	1.64863e-05	3.48858e-33	0.635859
274	Tot-cholesterol	choline	1123	TRUE	5.74573	-0.372735	-0.232077	0.315436	0.542542	-0.00111957	-0.0136472	1.00824e-59	0.406281	0.242293	0.149381	0.232963	0.767687	0.0348235	0.637876
471	Glucose	1-stearoyl-2-linoleoyl-GPE (18:0/18:2)*	1206	TRUE	1.26283	0.00172445	0.023952	0.0388043	-0.016153	0.00198465	0.00667154	1.92335e-305	0.923145	0.225291	1.41343e-08	0.234116	2.40158e-06	2.75774e-21	0.637994
438	HDL	1-oleoyl-2-dihomo-linolenoyl-GPC (18:1/20:3)*	1122	TRUE	2.3904	0.00804275	-0.132799	0.0592614	-0.0807771	0.00672639	-0.0369769	3.44265e-74	0.921552	0.119951	0.111503	0.235591	3.81612e-05	2.38091e-39	0.638986
552	Tot-cholesterol	3-methyl-2-oxobutyrate	1123	TRUE	5.97888	0.380127	-0.218907	0.0110053	-0.150416	-0.000464228	-0.0131554	2.0606e-85	0.0572674	0.271764	0.866026	0.239675	0.903378	0.0425563	0.640992
111	LDL	1-oleoyl-2-dihomo-linolenoyl-GPC (18:1/20:3)*	1122	TRUE	3.49753	0.409383	-0.203678	0.291034	-0.172158	-0.0101948	0.00181343	1.80561e-35	0.0194457	0.266211	0.000268799	0.23861	0.00361486	0.764125	0.640992
315	HDL	sphingomyelin (d18:2/16:0, d18:1/16:1)*	1123	TRUE	1.80273	0.0906305	-0.0606479	0.722709	-0.153675	0.00612134	-0.0400291	5.53263e-40	0.519976	0.451605	7.13262e-29	0.23919	6.59306e-05	3.55487e-52	0.640992
551	Tot-cholesterol	1-palmitoyl-2-palmitoleoyl-GPC (16:0/16:1)*	1123	TRUE	5.68966	-0.01439	-0.215176	0.448203	0.160939	-0.000176026	-0.0222479	8.73751e-81	0.934704	0.265602	6.15806e-11	0.244503	0.961917	0.000485398	0.644905
200	Triglycerides	1-palmitoyl-2-eicosapentaenoyl-GPC (16:0/20:5)*	1330	TRUE	-1.08223	0.166565	0.213294	0.0776759	-0.0620043	0.00399282	0.0319502	1.45659e-26	0.00799108	0.00558724	0.00242096	0.243739	0.00379694	6.11608e-29	0.644905
529	Tot-cholesterol	1-palmitoyl-2-linoleoyl-GPC (16:0/18:2)	1123	TRUE	2.31386	0.580098	-0.0292027	2.9381	-0.39014	0.00751158	-0.00626805	5.49623e-12	0.0922869	0.866126	7.69364e-65	0.243289	0.0238006	0.265586	0.644905
81	HDL	palmitoyl-linoleoyl-glycerol (16:0/18:2) [1]*	1052	TRUE	2.48727	-0.00342348	-0.157714	-0.290872	-0.0591393	0.00641608	-0.0274587	1.08009e-94	0.953118	0.0480487	1.37647e-28	0.246665	2.286e-05	4.89927e-25	0.647636
550	Glucose	ribitol	1184	TRUE	1.25072	0.0175849	0.0294811	0.0712868	-0.0328253	0.00188637	0.0062697	8.27609e-277	0.568507	0.143702	2.72349e-07	0.250732	9.69957e-06	8.13721e-18	0.648961
327	LDL	leucine	1122	TRUE	3.53407	-0.28399	-0.19459	0.141506	0.490558	-0.00878331	0.00383283	1.33315e-24	0.51992	0.2917	0.537243	0.250881	0.0125259	0.532982	0.648961
266	LDL	sphingomyelin (d18:2/23:0, d18:1/23:1, d17:1/24:1)*	1123	TRUE	1.39707	0.533922	0.049608	1.94418	-0.279234	-0.0111311	0.0177381	6.57785e-07	0.0412809	0.761093	9.99942e-59	0.2514	0.000333085	0.00086732	0.648961
85	Glucose	3-hydroxyisobutyrate	1187	TRUE	1.29948	0.000543813	0.0249654	-0.00590103	-0.0136846	0.00198117	0.00733341	8.09944e-307	0.975605	0.228992	0.375963	0.251684	5.6455e-06	1.28747e-24	0.648961
479	LDL	1-palmitoyl-2-linoleoyl-GPI (16:0/18:2)	1066	TRUE	3.37174	0.018131	-0.115579	0.29835	0.186033	-0.00725726	-0.000226048	3.14979e-30	0.922079	0.521941	0.000940861	0.256101	0.0407262	0.970392	0.654904
107	HDL	3-methyl-2-oxobutyrate	1123	TRUE	2.41302	-0.172543	-0.133897	0.0511725	0.0622088	0.00632828	-0.0371813	4.85863e-76	0.0439443	0.116542	0.0670877	0.256267	0.000111862	7.82425e-41	0.654904
509	Tot-cholesterol	palmitoyl sphingomyelin (d18:1/16:0)	1123	TRUE	1.61645	0.582014	0.138503	3.79637	-0.401276	-0.00334584	0.0116385	2.32369e-07	0.113943	0.39159	7.21623e-107	0.258585	0.276027	0.0290174	0.656675
365	Glucose	beta-hydroxyisovalerate	1195	TRUE	1.25353	0.0142698	0.0236283	0.0528376	-0.0305025	0.00186785	0.00693861	5.32499e-271	0.628055	0.239048	4.3088e-05	0.259244	1.34748e-05	2.471e-22	0.656675
432	Triglycerides	sphingomyelin (d18:1/24:1, d18:2/24:0)*	1302	TRUE	-1.03068	0.243114	0.194378	-0.0871844	-0.139945	0.0059186	0.0323729	3.15897e-20	0.0575803	0.0118818	0.149537	0.26122	1.322e-05	4.87089e-29	0.658777
298	Triglycerides	3-hydroxyisobutyrate	1325	TRUE	-1.09494	0.153953	0.189773	-0.0754092	-0.052521	0.00634135	0.0335659	2.26633e-27	0.00669336	0.015133	0.00662688	0.273053	2.98132e-06	4.03721e-31	0.659686
401	Glucose	alpha-hydroxyisocaproate	1206	TRUE	1.26568	0.0110672	0.0242704	0.0308302	-0.0251728	0.00195868	0.00704788	2.2241e-274	0.681972	0.227698	0.00648366	0.272867	4.79025e-06	3.7977e-23	0.659686
343	Triglycerides	sphingosine	1297	TRUE	-1.09662	0.172384	0.215218	0.0981316	-0.0607606	0.00486386	0.0295361	5.39348e-26	0.0129424	0.00653788	0.000268665	0.272574	0.000266847	1.40895e-23	0.659686
484	LDL	1-palmitoyl-2-arachidonoyl-GPC (16:0/20:4n6)	1123	TRUE	3.2179	0.503161	-0.183804	0.398948	-0.250314	-0.0090236	0.00468754	8.12531e-26	0.0570916	0.316255	0.000916532	0.270365	0.00989628	0.432453	0.659686
238	Glucose	1-palmitoyl-2-oleoyl-GPC (16:0/18:1)	1207	TRUE	1.30364	-0.0555217	0.0243891	-0.00716484	0.0364559	0.00194637	0.00722024	3.43604e-250	0.125592	0.228078	0.659477	0.271808	6.11693e-06	3.27913e-24	0.659686
257	LDL	galactonate	1024	TRUE	3.56087	0.123104	-0.181244	-0.0273802	0.0699422	-0.00876456	0.00979405	2.90917e-34	0.274752	0.340142	0.351017	0.270185	0.0160338	0.124145	0.659686
345	Glucose	tiglylcarnitine (C5:1-DC)	1200	TRUE	1.28338	0.00992806	0.0232919	0.011849	-0.025296	0.00191913	0.00727824	1.58907e-294	0.700644	0.249622	0.290627	0.266519	1.08329e-05	1.81327e-24	0.659686
514	LDL	sphingomyelin (d18:1/18:1, d18:2/18:0)	1123	TRUE	2.5781	0.532121	-0.0971026	1.55482	-0.295843	-0.0128989	-0.00602317	1.98635e-19	0.0588342	0.575077	1.30081e-28	0.264138	9.97295e-05	0.292125	0.659686
462	LDL	1-oleoyl-2-docosahexaenoyl-GPC (18:1/22:6)*	1123	TRUE	3.09013	0.429282	-0.205602	0.46329	-0.209186	-0.011371	0.0138361	9.81084e-25	0.0422406	0.260117	4.62875e-06	0.263676	0.0012401	0.0254615	0.659686
322	LDL	palmitoyl sphingomyelin (d18:1/16:0)	1123	TRUE	-0.253263	0.604474	0.141176	3.37474	-0.37064	-0.0115712	0.0279076	0.391985	0.0828376	0.356133	2.51713e-94	0.27029	6.88843e-05	3.19101e-08	0.659686
571	Glucose	sphingomyelin (d18:2/24:1, d18:1/24:2)*	1207	TRUE	1.38238	-0.0528481	0.0155371	-0.0810982	0.0330479	0.00206369	0.00696541	1.82585e-299	0.111337	0.435251	3.16496e-07	0.27745	1.05582e-06	2.2776e-23	0.667504
367	Tot-cholesterol	phosphate	1123	TRUE	6.03173	-0.78776	-0.233095	-0.0203733	0.951348	-0.000775663	-0.0130276	2.93661e-30	0.37075	0.241353	0.962077	0.279516	0.838309	0.04411	0.669673
82	HDL	1-palmitoyl-2-docosahexaenoyl-GPE (16:0/22:6)*	1123	TRUE	2.40246	-0.00620464	-0.135008	0.0367685	-0.0632756	0.00672267	-0.0365295	1.9661e-74	0.937425	0.114649	0.229376	0.282694	4.43525e-05	1.92367e-39	0.674477
109	Triglycerides	1-stearoyl-2-linoleoyl-GPE (18:0/18:2)*	1329	TRUE	-1.25875	0.122937	0.164639	0.450632	-0.0404945	0.0035716	0.0236138	3.45051e-60	0.00809055	0.00495787	1.5085e-106	0.285174	0.00036817	6.82269e-27	0.677583
501	Tot-cholesterol	succinate	1123	TRUE	6.13017	-0.136392	-0.232456	-0.122444	0.323677	-0.000746918	-0.0133258	2.02969e-74	0.641518	0.242532	0.431486	0.293208	0.844252	0.03962	0.685343
519	Triglycerides	sphinganine-1-phosphate	1230	TRUE	-1.10571	0.181752	0.197516	-0.00348255	-0.0951647	0.0051762	0.0333018	3.69132e-24	0.0650443	0.0138683	0.937682	0.292426	0.000142234	1.39198e-29	0.685343
74	HDL	1-margaroyl-2-oleoyl-GPC (17:0/18:1)*	1123	TRUE	2.04986	0.0306186	-0.152162	0.366459	-0.104439	0.00519957	-0.0329245	1.42296e-50	0.78348	0.068134	6.76879e-13	0.291769	0.00118422	4.56828e-33	0.685343
518	Tot-cholesterol	1-stearoyl-2-docosapentaenoyl-GPC (18:0/22:5n6)*	1121	TRUE	5.62437	0.321407	-0.2573	0.428862	-0.140446	-0.000263365	-0.0189288	7.56012e-76	0.0685267	0.189024	9.46438e-09	0.291911	0.943835	0.00333258	0.685343
379	Triglycerides	ribonate	1329	TRUE	-1.11787	0.0158721	0.189861	0.123823	0.0795647	0.00425907	0.0308138	4.51712e-27	0.854521	0.0132875	0.00151145	0.297667	0.0012425	7.42302e-27	0.689984
210	LDL	1-stearoyl-2-arachidonoyl-GPI (18:0/20:4)	1122	TRUE	3.73534	-0.0777229	-0.181709	-0.0752139	0.268912	-0.00903987	0.00536085	1.20331e-34	0.79018	0.32498	0.540861	0.298496	0.0102532	0.374771	0.689984
76	LDL	3-hydroxy-2-ethylpropionate	1123	TRUE	3.68158	-0.0106268	-0.186147	-0.00612325	0.201022	-0.00944035	0.00552851	5.8215e-37	0.963069	0.312548	0.950399	0.29978	0.00765267	0.357557	0.689984
537	HDL	N-acetylvaline	1123	TRUE	2.66964	-0.211629	-0.102679	-0.380384	0.135553	0.00776827	-0.0331596	1.19755e-83	0.121223	0.223996	1.27409e-07	0.300302	1.5411e-06	4.26398e-32	0.689984
407	HDL	3-hydroxy-2-ethylpropionate	1123	TRUE	2.40584	-0.188403	-0.131202	0.0652448	0.09278	0.00640536	-0.03704	6.78729e-72	0.0761604	0.124116	0.152173	0.301193	9.25507e-05	1.85928e-40	0.689984
443	Triglycerides	glucose	1330	TRUE	-1.43313	-0.0597688	0.156854	0.414119	0.165168	0.00524062	0.0291753	6.01384e-32	0.723682	0.0370116	1.1598e-08	0.307036	4.41155e-05	2.90136e-25	0.692335
387	HDL	1-stearoyl-2-linoleoyl-GPE (18:0/18:2)*	1122	TRUE	2.48518	-0.0153286	-0.130472	-0.0627644	-0.0539612	0.00656567	-0.0348514	4.34773e-80	0.828983	0.125369	0.0203103	0.306992	5.39684e-05	2.59266e-35	0.692335
285	HDL	1-palmitoyl-2-stearoyl-GPC (16:0/18:0)	1123	TRUE	2.00195	0.0423219	-0.122915	0.339825	-0.118953	0.0069979	-0.033752	1.59544e-41	0.732818	0.144378	2.31021e-08	0.30593	1.31038e-05	6.13992e-34	0.692335
324	LDL	1-margaroyl-2-oleoyl-GPC (17:0/18:1)*	1123	TRUE	2.70906	0.45204	-0.243941	0.891999	-0.21646	-0.0132557	0.0146429	2.38244e-20	0.0577972	0.171431	2.88891e-16	0.306847	0.000110608	0.0127192	0.692335
57	Tot-cholesterol	sphinganine	500	TRUE	6.09949	-0.140802	-0.161522	0.151944	0.255965	-0.000569888	-0.0187201	1.38551e-36	0.610291	0.561752	0.207485	0.3108	0.919407	0.0713926	0.693879
174	Glucose	palmitoyl sphingomyelin (d18:1/16:0)	1207	TRUE	1.41256	-0.0659903	0.0150912	-0.100437	0.0482063	0.00198573	0.0066193	9.64794e-242	0.182485	0.451438	1.34999e-05	0.311999	2.90296e-06	2.05618e-20	0.693879
61	Triglycerides	1-palmitoyl-2-oleoyl-GPI (16:0/18:1)*	1276	TRUE	-1.25291	0.0238204	0.226852	0.23608	0.0747903	0.00538721	0.0287607	1.45012e-33	0.776806	0.00282921	2.60791e-11	0.313996	2.93554e-05	1.34524e-24	0.693879
264	Triglycerides	arabitol/xylitol	1330	TRUE	-1.073	-0.00174871	0.200146	0.0597331	0.105348	0.00436953	0.0316717	7.28626e-25	0.987039	0.00937533	0.230466	0.314785	0.00142665	4.07639e-28	0.693879
127	LDL	4-methyl-2-oxopentanoate	1123	TRUE	3.79488	0.395334	-0.183069	-0.113605	-0.129548	-0.00873223	0.00531945	3.15097e-39	0.0394492	0.320015	0.0879701	0.315787	0.0127898	0.373261	0.693879
386	HDL	1-palmitoyl-2-oleoyl-GPE (16:0/18:1)	1079	TRUE	2.41922	-0.0276539	-0.12244	-0.042893	-0.0409737	0.00730266	-0.0348096	1.9154e-74	0.650974	0.149468	0.0372754	0.316426	1.22818e-05	1.89512e-33	0.693879
54	LDL	1-palmitoyl-2-oleoyl-GPE (16:0/18:1)	1079	TRUE	3.60008	0.119075	-0.177759	-0.069986	0.088417	-0.00743852	0.00638346	5.12647e-36	0.368893	0.334417	0.117	0.318679	0.0399372	0.307997	0.693879
486	LDL	tiglylcarnitine (C5:1-DC)	1116	TRUE	3.55	0.405608	-0.195934	0.11867	-0.185008	-0.00939998	0.0054635	5.18276e-35	0.0553559	0.287913	0.213176	0.319685	0.00828948	0.362697	0.693879
360	Glucose	1-stearoyl-2-dihomo-linolenoyl-GPC (18:0/20:3n3 or 6)*	1207	TRUE	1.29748	-0.0410692	0.0231592	0.000397046	0.0219759	0.00195829	0.00712045	2.88754e-298	0.11468	0.252187	0.972823	0.319685	5.33636e-06	3.2721e-22	0.693879
475	HDL	1-stearoyl-2-arachidonoyl-GPE (18:0/20:4)	1123	TRUE	2.48698	-0.00516829	-0.115853	-0.0864428	-0.061442	0.00708187	-0.0349811	6.1719e-81	0.949923	0.173497	0.00648032	0.320341	1.27808e-05	5.33811e-36	0.693879
422	Glucose	1-stearoyl-2-docosahexaenoyl-GPC (18:0/22:6)	1207	TRUE	1.29326	0.00629971	0.0231144	-0.000328548	-0.0196716	0.00199491	0.00722458	3.10998e-295	0.797572	0.252881	0.973181	0.320994	4.65532e-06	4.01687e-24	0.693879
187	Glucose	glycerophosphoethanolamine	1206	TRUE	1.33634	-0.0346617	0.021321	-0.0283982	0.0165448	0.00185086	0.00710092	2.23074e-308	0.087495	0.28923	0.000359766	0.32703	1.57964e-05	1.22332e-23	0.693882
485	Glucose	choline phosphate	1157	TRUE	1.31871	0.00106143	0.00539871	-0.0130021	-0.0142303	0.00187798	0.00698987	0	0.951864	0.792192	0.0886456	0.326095	1.48354e-05	1.44839e-22	0.693882
554	Glucose	glycerate	1206	TRUE	1.30077	-0.0428417	0.0230287	-0.00507766	0.0280982	0.00193263	0.00725511	9.04282e-251	0.123666	0.254709	0.724274	0.325398	7.85016e-06	3.41307e-24	0.693882
392	Glucose	phosphatidylcholine (16:0/22:5n3, 18:1/20:4)*	1207	TRUE	1.32298	-0.0509678	0.0246798	-0.0239833	0.0309836	0.0019854	0.00710909	1.67196e-257	0.153591	0.222611	0.137762	0.322578	4.14481e-06	3.53698e-23	0.693882
377	Glucose	sphingomyelin (d18:1/18:1, d18:2/18:0)	1207	TRUE	1.34086	-0.0509802	0.0212607	-0.0594324	0.0328549	0.00204823	0.00762467	5.04946e-292	0.151423	0.289523	0.000741411	0.323436	1.68756e-06	1.94046e-26	0.693882
101	HDL	isobutyrylglycine	1114	TRUE	2.55746	-0.150184	-0.109261	-0.147258	0.0690245	0.00678545	-0.0355163	4.54191e-82	0.0496279	0.199608	7.59493e-05	0.334176	2.97004e-05	4.04772e-37	0.703618
325	HDL	1-palmitoyl-2-arachidonoyl-GPI (16:0/20:4)*	1053	TRUE	2.49083	-0.00646701	-0.144607	-0.0422224	-0.0729013	0.00619327	-0.0349143	1.36175e-71	0.944384	0.128999	0.292207	0.334768	0.000275837	6.39696e-33	0.703618
169	Tot-cholesterol	1-palmitoyl-2-linoleoyl-GPE (16:0/18:2)	1123	TRUE	5.81241	0.0181066	-0.2237	0.211551	0.120116	0.000234819	-0.0172607	1.64646e-81	0.91203	0.256652	0.000664815	0.335827	0.950302	0.00763205	0.703618
409	Glucose	sphingomyelin (d18:2/16:0, d18:1/16:1)*	1207	TRUE	1.37367	-0.0536818	0.0176052	-0.0816065	0.0340213	0.0019665	0.00752744	1.8833e-295	0.159061	0.376901	1.93396e-06	0.336513	3.32633e-06	9.96203e-27	0.703618
505	Tot-cholesterol	ribonate	1122	TRUE	6.1191	-0.0356357	-0.22559	-0.138627	0.17614	-0.000191808	-0.0127211	6.30797e-88	0.864598	0.25616	0.12259	0.344753	0.959899	0.0518883	0.715542
396	Triglycerides	1-palmitoyl-2-docosahexaenoyl-GPE (16:0/22:6)*	1330	TRUE	-1.20524	0.131888	0.15571	0.391	-0.0458142	0.000310789	0.031764	7.33045e-42	0.0211902	0.0214666	3.06191e-52	0.347011	0.794075	2.13492e-36	0.715542
362	Tot-cholesterol	1-stearoyl-2-arachidonoyl-GPE (18:0/20:4)	1123	TRUE	5.93944	0.328078	-0.2474	0.0866901	-0.135981	-0.000907696	-0.0139623	3.59387e-84	0.088573	0.214393	0.243525	0.347478	0.811148	0.0326767	0.715542
559	Glucose	1-palmitoyl-2-linoleoyl-GPE (16:0/18:2)	1207	TRUE	1.26865	-0.00196133	0.0245436	0.0290007	-0.0130012	0.0019763	0.00692222	2.16588e-301	0.913101	0.218611	2.68919e-05	0.348682	3.33582e-06	1.16831e-22	0.715542
11	Glucose	phosphate	1207	TRUE	1.27066	0.0722222	0.0232305	0.0246089	-0.08923	0.00195902	0.00722713	1.28192e-112	0.44846	0.250243	0.585421	0.348771	5.30752e-06	2.8941e-24	0.715542
457	HDL	glycerate	1123	TRUE	2.30952	0.0156731	-0.129663	0.0990354	-0.105913	0.00723384	-0.036073	8.12742e-55	0.885314	0.128977	0.0794482	0.349682	1.05186e-05	3.95301e-38	0.715542
427	Triglycerides	trimethylamine N-oxide	1330	TRUE	-1.06859	0.133986	0.199389	0.00447212	-0.0248333	0.00512295	0.0319761	5.29967e-26	0.00418077	0.0100453	0.741424	0.357368	0.000118896	1.02218e-28	0.728675
421	Tot-cholesterol	N-acetylvaline	1123	TRUE	6.12105	-0.114304	-0.226193	-0.125545	0.272822	-0.000557507	-0.0129601	4.36455e-79	0.722782	0.256216	0.460104	0.376964	0.883756	0.0507281	0.73031
230	HDL	sphinganine-1-phosphate	1002	TRUE	2.36109	-0.196498	-0.0831439	0.0371687	0.0929182	0.00797918	-0.0371266	4.7435e-59	0.0799915	0.365352	0.47362	0.375543	4.64799e-06	3.90954e-36	0.73031
308	Triglycerides	malate	1274	TRUE	-1.10498	0.157361	0.216255	0.0417765	-0.0547963	0.00463304	0.0328589	4.23219e-26	0.0301738	0.00696833	0.168824	0.377752	0.000611265	7.69088e-28	0.73031
161	HDL	N-acetylisoleucine	1112	TRUE	2.57339	-0.157442	-0.120167	-0.237635	0.0820736	0.00767424	-0.0347891	1.47514e-81	0.105094	0.155355	1.16046e-06	0.374009	2.31772e-06	1.04594e-34	0.73031
294	HDL	1-palmitoyl-2-linoleoyl-GPE (16:0/18:2)	1123	TRUE	2.46895	-0.0264747	-0.131089	-0.0355009	-0.0473812	0.00668161	-0.0357404	1.36604e-78	0.70893	0.124533	0.18683	0.380332	4.17417e-05	2.60307e-37	0.73031
247	HDL	oleoyl-linoleoyl-glycerol (18:1/18:2) [2]	1122	TRUE	2.59582	-0.015389	-0.113154	-0.287171	-0.0477594	0.00686558	-0.0308133	3.60814e-100	0.821116	0.157663	5.38908e-25	0.380616	6.84344e-06	1.80574e-31	0.73031
193	Tot-cholesterol	sphingomyelin (d18:2/16:0, d18:1/16:1)*	1123	TRUE	3.44447	0.443584	0.0611441	2.95909	-0.221753	-0.00379638	-0.0285402	7.68156e-39	0.10436	0.695617	6.3385e-123	0.381031	0.201922	2.30811e-08	0.73031
240	LDL	1-stearoyl-2-linoleoyl-GPE (18:0/18:2)*	1122	TRUE	3.52314	0.0913292	-0.185516	0.155672	0.100243	-0.00839403	0.00181533	1.07015e-35	0.550221	0.311727	0.00754432	0.378349	0.016561	0.764297	0.73031
435	Tot-cholesterol	palmitoyl dihydrosphingomyelin (d18:0/16:0)*	1123	TRUE	3.11202	0.369284	0.0992005	2.25755	-0.213061	0.000301677	0.00363481	3.63446e-26	0.156377	0.555069	4.66177e-82	0.371859	0.924745	0.508787	0.73031
143	LDL	1-palmitoyl-2-eicosapentaenoyl-GPC (16:0/20:5)*	1123	TRUE	3.4187	0.0968494	-0.15	0.230296	0.0901396	-0.0118095	0.00918183	3.03307e-34	0.515749	0.408713	1.44226e-06	0.367112	0.000716457	0.121435	0.73031
454	HDL	1-stearoyl-2-oleoyl-GPE (18:0/18:1)	1108	TRUE	2.46807	-0.0300407	-0.108719	-0.0681771	-0.0389721	0.00659643	-0.0339291	9.56801e-80	0.639701	0.200299	0.00102784	0.370069	5.31445e-05	1.87777e-32	0.73031
312	HDL	1-palmitoyl-2-adrenoyl-GPC (16:0/22:4)*	1122	TRUE	2.41115	-0.0262018	-0.128524	0.0833402	-0.0490072	0.00631963	-0.0379461	2.59895e-75	0.711353	0.130309	0.00424367	0.359584	0.000105311	9.80457e-42	0.73031
402	Glucose	1-palmitoyl-2-arachidonoyl-GPE (16:0/20:4)*	1207	TRUE	1.27082	-0.000391291	0.0204428	0.0262728	-0.0137314	0.00190617	0.0070726	9.52229e-298	0.984494	0.308049	0.000506135	0.361095	7.80295e-06	1.35236e-23	0.73031
526	Glucose	1-oleoyl-2-dihomo-linolenoyl-GPC (18:1/20:3)*	1206	TRUE	1.30582	-0.0347689	0.0242271	-0.0139333	0.0161976	0.00198576	0.00734495	0	0.101293	0.230517	0.148665	0.362898	4.12156e-06	1.74863e-24	0.73031
97	Triglycerides	sphinganine	790	TRUE	-1.07744	-0.0701657	0.1237	0.0440684	0.077962	0.00554504	0.03062	7.65528e-14	0.498196	0.210572	0.290648	0.370665	0.00195867	2.01581e-16	0.73031
229	Tot-cholesterol	1-stearoyl-2-arachidonoyl-GPI (18:0/20:4)	1122	TRUE	6.0075	-0.11507	-0.233717	0.0150851	0.251884	-0.00050198	-0.0141775	1.03188e-74	0.71519	0.240906	0.909608	0.367083	0.894929	0.0296489	0.73031
496	Triglycerides	methylsuccinate	1325	TRUE	-1.07716	0.0362921	0.204423	0.0193566	0.0633904	0.00505881	0.0318745	4.86057e-25	0.641846	0.00820365	0.581866	0.364009	0.000144484	1.95321e-28	0.73031
130	LDL	1-palmitoyl-2-stearoyl-GPC (16:0/18:0)	1123	TRUE	1.13404	0.434682	-0.140942	1.95397	-0.197994	-0.00832067	0.0221792	5.5176e-05	0.0644433	0.377398	2.21251e-64	0.368818	0.006277	2.56917e-05	0.73031
399	Glucose	isovalerylglycine	1182	TRUE	1.25506	-0.0328266	0.0306946	0.0349043	0.0185554	0.00210974	0.00714346	1.1704e-277	0.124411	0.133917	0.000534032	0.382792	9.48302e-07	2.48123e-23	0.731247
516	HDL	arabitol/xylitol	1123	TRUE	2.398	0.00914651	-0.12868	0.0508	-0.0826781	0.006673	-0.036769	1.07325e-72	0.933162	0.13241	0.259495	0.385136	5.70184e-05	1.01125e-39	0.733289
354	Triglycerides	2-hydroxy-3-methylvalerate	1329	TRUE	-1.11891	0.154219	0.195741	0.132141	-0.0479634	0.00463834	0.029745	7.2161e-29	0.0200451	0.00959006	3.30042e-06	0.401113	0.000329729	1.40628e-25	0.739278
22	Glucose	1-margaroyl-2-linoleoyl-GPC (17:0/18:2)*	1207	TRUE	1.30258	0.00781874	0.0223331	-0.00416577	-0.0237232	0.00195913	0.00711032	8.94389e-251	0.797785	0.269507	0.763039	0.400963	5.28094e-06	4.22433e-22	0.739278
20	Triglycerides	1-palmitoyl-2-linoleoyl-GPE (16:0/18:2)	1330	TRUE	-1.29848	0.120964	0.189813	0.40097	-0.0332771	0.00403132	0.0262007	3.90714e-56	0.0133945	0.00242103	2.44601e-78	0.400568	0.000163056	3.66437e-29	0.739278
166	Tot-cholesterol	alpha-ketoglutarate	1123	TRUE	6.01258	0.024551	-0.231969	-0.23098	0.100152	0.00251019	-0.00867181	5.28068e-89	0.893208	0.241779	0.00057873	0.399982	0.516996	0.185989	0.739278
546	Glucose	4-methyl-2-oxopentanoate	1207	TRUE	1.27099	0.000483801	0.0248431	0.0207681	-0.0125381	0.00186763	0.00726565	1.29043e-288	0.982802	0.216973	0.00664105	0.401139	1.31485e-05	9.40556e-25	0.739278
273	Tot-cholesterol	valine	1123	TRUE	5.90222	-0.256024	-0.235727	0.153809	0.402979	-0.000364032	-0.0158144	9.76092e-57	0.604621	0.236238	0.545903	0.396063	0.923615	0.0194304	0.739278
573	HDL	malate	1064	TRUE	2.45333	-0.133933	-0.127666	-0.0497109	0.062341	0.00792946	-0.0377432	2.36222e-75	0.0970619	0.140968	0.1567	0.394474	2.51471e-06	9.48366e-39	0.739278
476	Tot-cholesterol	sphingosine	1042	TRUE	6.11544	0.00861535	-0.186482	0.0261508	0.136398	-0.00124601	-0.016746	1.8819e-85	0.961026	0.358678	0.728194	0.39435	0.749961	0.0109923	0.739278
525	LDL	alpha-ketoglutarate	1123	TRUE	3.64084	0.0904665	-0.184285	-0.294852	0.0934421	-0.00494554	0.0117188	1.63833e-39	0.591208	0.312561	1.83581e-06	0.393798	0.165656	0.0523295	0.739278
241	Triglycerides	1,5-anhydroglucitol (1,5-AG)	1328	TRUE	-0.968426	0.0201071	0.204625	-0.0858956	0.0816343	0.00487182	0.0321724	4.49988e-18	0.845708	0.00802517	0.0682501	0.399224	0.000235848	4.95681e-29	0.739278
425	LDL	1-myristoyl-2-linoleoyl-GPC (14:0/18:2)*	1123	TRUE	2.77853	0.37027	-0.142399	0.697843	-0.134148	-0.0064494	0.00395516	6.47041e-22	0.0436684	0.423942	6.93815e-16	0.405938	0.0583399	0.494429	0.741638
261	Triglycerides	pyruvate	1326	TRUE	-1.06377	0.0721055	0.207257	0.0160493	0.0352833	0.0049736	0.0316878	7.01745e-26	0.136252	0.00807556	0.404768	0.406275	0.000176695	3.60563e-28	0.741638
140	LDL	glycerate	1123	TRUE	3.78352	0.401238	-0.183504	-0.0900507	-0.202802	-0.00955727	0.00485243	2.25047e-32	0.0868243	0.319069	0.459561	0.406288	0.00694084	0.42062	0.741638
255	Glucose	N-acetylvaline	1207	TRUE	1.25321	0.0108389	0.0219879	0.06585	-0.0284266	0.00181172	0.00667483	3.63997e-261	0.762854	0.273372	0.000286367	0.4091	2.37049e-05	3.01075e-20	0.742058
118	Tot-cholesterol	tiglylcarnitine (C5:1-DC)	1116	TRUE	5.89429	0.327911	-0.242858	0.126553	-0.166132	-0.000817539	-0.01345	2.21759e-80	0.151377	0.222466	0.218912	0.407887	0.831582	0.0379289	0.742058
120	Triglycerides	choline	1330	TRUE	-1.08021	0.243671	0.202675	0.0204375	-0.137579	0.00506351	0.0319621	9.99889e-18	0.172439	0.00883409	0.80679	0.418658	0.000131955	2.19392e-28	0.755909
249	HDL	sphingomyelin (d18:2/14:0, d18:1/14:1)*	1109	TRUE	2.15742	0.00280642	-0.0865127	0.511399	-0.0730184	0.00553793	-0.0440404	1.13494e-63	0.97817	0.297615	3.44348e-27	0.419365	0.000370209	1.58478e-59	0.755909
149	HDL	glucose	1123	TRUE	2.58176	0.0872957	-0.121262	-0.201797	-0.168516	0.00709959	-0.0346506	2.16231e-66	0.688183	0.15489	0.0323675	0.420999	1.32831e-05	5.37947e-34	0.756483
555	LDL	sphingomyelin (d18:1/24:1, d18:2/24:0)*	1096	TRUE	1.97322	0.457232	-0.00589461	1.46937	-0.199772	-0.0110567	0.0135493	1.10941e-11	0.0948211	0.972508	1.52307e-36	0.423386	0.00075626	0.0158371	0.757673
373	LDL	trimethylamine N-oxide	1123	TRUE	3.61645	0.28319	-0.184154	0.0293205	-0.0457829	-0.00922461	0.00566815	4.16392e-38	0.00954032	0.318046	0.375771	0.426305	0.00887185	0.344007	0.757673
433	Triglycerides	succinylcarnitine (C4-DC)	1304	TRUE	-1.14059	0.180594	0.134809	0.259401	-0.0834284	0.00348408	0.0285004	1.94846e-29	0.0988219	0.0904615	1.59135e-06	0.427209	0.0106364	2.96837e-22	0.757673
413	LDL	1-palmitoyl-2-docosahexaenoyl-GPC (16:0/22:6)	1123	TRUE	2.79189	0.35833	-0.140397	0.735871	-0.135821	-0.0131919	0.0165149	3.38559e-22	0.0810864	0.43018	1.29926e-16	0.428051	0.000117326	0.00516057	0.757673
374	Triglycerides	succinate	1330	TRUE	-1.1008	0.180462	0.200232	0.0452727	-0.0716998	0.00505296	0.0316713	1.80103e-24	0.0833128	0.00961329	0.32157	0.42825	0.000128667	2.00223e-27	0.757673
346	Tot-cholesterol	1-palmitoyl-2-eicosapentaenoyl-GPC (16:0/20:5)*	1123	TRUE	5.58863	0.0517879	-0.167392	0.408264	0.0823273	-0.00514202	-0.00733119	6.94731e-80	0.741602	0.381714	5.25044e-16	0.434472	0.162169	0.24063	0.765983
113	Triglycerides	N-acetylleucine	1330	TRUE	-1.17089	0.165591	0.210384	0.239091	-0.064121	0.00455913	0.0277341	3.59219e-30	0.0669881	0.0052624	1.75997e-07	0.435611	0.000403599	7.82891e-22	0.765983
242	Triglycerides	sphingomyelin (d18:1/17:0, d17:1/18:0, d19:1/16:0)	1330	TRUE	-1.01823	0.189217	0.199087	-0.0681118	-0.0823885	0.00559522	0.0319227	4.33422e-20	0.0994513	0.00984773	0.224872	0.43972	3.34212e-05	1.05525e-28	0.770851
117	Tot-cholesterol	sphingomyelin (d18:2/14:0, d18:1/14:1)*	1109	TRUE	5.10569	0.342157	-0.0320524	1.75769	-0.144576	-0.00571232	-0.0401113	5.94617e-79	0.115009	0.855506	2.00433e-69	0.449933	0.0830054	2.68482e-12	0.780469
78	Triglycerides	1-stearoyl-2-arachidonoyl-GPI (18:0/20:4)	1329	TRUE	-1.37701	0.16909	0.136576	0.564526	-0.0769203	0.00314628	0.0267999	3.01663e-42	0.105176	0.0567675	3.85467e-25	0.451993	0.0107559	2.1281e-23	0.780469
178	LDL	1-margaroyl-2-linoleoyl-GPC (17:0/18:2)*	1123	TRUE	2.07565	0.407442	-0.115816	1.14615	-0.167778	-0.0105628	0.0225327	6.17829e-12	0.094019	0.507761	5.9678e-25	0.451723	0.00152802	0.000122854	0.780469
194	Triglycerides	4-methyl-2-oxopentanoate	1330	TRUE	-1.06644	0.135488	0.202908	0.010777	-0.0447059	0.00505885	0.0319199	9.44044e-26	0.0132572	0.00890645	0.71551	0.451663	0.000193717	2.0165e-28	0.780469
5	Tot-cholesterol	sphingomyelin (d18:1/24:1, d18:2/24:0)*	1096	TRUE	4.04595	0.404305	-0.0170278	1.71621	-0.199794	-0.00264915	-0.00458649	2.93824e-39	0.164288	0.925321	7.59949e-44	0.450932	0.447276	0.44188	0.780469
508	LDL	1-palmitoyl-2-linoleoyl-GPC (16:0/18:2)	1123	TRUE	0.96027	0.481512	-0.0389113	2.13862	-0.244728	-0.00321634	0.0108806	0.00360148	0.154995	0.819073	2.94115e-36	0.456378	0.324337	0.0491157	0.783322
84	Glucose	N-acetylleucine	1202	TRUE	1.25335	0.00274463	0.0240411	0.0586037	-0.0191812	0.00198009	0.00662466	1.308e-277	0.915038	0.228472	8.08767e-06	0.457291	3.44082e-06	2.90618e-20	0.783322
99	LDL	sphingomyelin (d18:2/14:0, d18:1/14:1)*	1109	TRUE	2.96448	0.383379	-0.0293231	1.33278	-0.139566	-0.0130304	-0.0144331	9.73904e-29	0.0724672	0.865293	1.11535e-41	0.458281	5.68288e-05	0.0103968	0.783322
502	Triglycerides	palmitoyl-linoleoyl-glycerol (16:0/18:2) [2]*	1286	TRUE	-1.07261	0.108298	0.150778	0.409324	-0.0219677	0.00330079	0.0170621	1.02627e-51	0.00824587	0.00595735	1.9003e-156	0.461953	0.000381868	1.41493e-16	0.783322
361	Glucose	1-stearoyl-2-docosapentaenoyl-GPC (18:0/22:5n6)*	1205	TRUE	1.30013	-0.0305242	0.0238197	-0.0036148	0.0111337	0.00196302	0.00719768	6.70265e-302	0.127897	0.239863	0.66437	0.46239	5.24953e-06	1.50169e-23	0.783322
183	Tot-cholesterol	1-palmitoyl-2-arachidonoyl-GPE (16:0/20:4)*	1123	TRUE	5.93832	0.283444	-0.240476	0.0739876	-0.0997922	-0.000766264	-0.0136792	3.50739e-83	0.121102	0.226981	0.284606	0.465046	0.839986	0.0350549	0.783322
463	LDL	sphingomyelin (d17:1/16:0, d18:1/15:0, d16:1/17:0)*	1123	TRUE	1.70662	0.395196	0.0128189	1.78792	-0.154888	-0.0140727	0.0188202	1.1085e-10	0.0880826	0.935916	3.44719e-69	0.465375	3.80511e-06	0.000308641	0.783322
222	LDL	1,2-dilinoleoyl-GPC (18:2/18:2)	1123	TRUE	2.30441	0.358774	-0.14327	0.666098	-0.111975	-0.00397186	0.0167795	8.55631e-14	0.042475	0.420767	2.67612e-16	0.466373	0.248367	0.00455072	0.783322
567	Triglycerides	beta-hydroxyisovalerate	1317	TRUE	-1.13757	0.173957	0.198303	0.122073	-0.0707826	0.00478207	0.0307575	1.61673e-26	0.0915149	0.0101318	0.0125629	0.466375	0.000303779	4.18261e-26	0.783322
30	Glucose	sphingomyelin (d18:1/17:0, d17:1/18:0, d19:1/16:0)	1207	TRUE	1.31309	0.00570464	0.0212292	-0.0168193	-0.0209878	0.00200249	0.00712391	1.52703e-280	0.858131	0.293275	0.21976	0.467269	3.34664e-06	1.66069e-23	0.783322
303	HDL	1-palmitoyl-2-arachidonoyl-GPE (16:0/20:4)*	1123	TRUE	2.44503	-0.0304072	-0.127636	-0.0115322	-0.0424068	0.00687201	-0.0363303	1.6525e-76	0.698746	0.135625	0.697888	0.469994	2.51402e-05	8.74682e-39	0.785601
332	Tot-cholesterol	4-methyl-2-oxopentanoate	1123	TRUE	6.00602	0.297743	-0.224343	0.00410882	-0.0980539	-0.000599671	-0.0134642	9.21782e-82	0.151971	0.260451	0.954538	0.483151	0.874542	0.037405	0.789238
458	Triglycerides	1-palmitoyl-2-docosahexaenoyl-GPC (16:0/22:6)	1330	TRUE	-1.1988	0.156964	0.206395	0.196082	-0.058916	0.00326928	0.0336641	2.41468e-30	0.0768576	0.00678257	3.47667e-06	0.483039	0.0160688	5.92655e-32	0.789238
394	LDL	1-palmitoyl-2-oleoyl-GPC (16:0/18:1)	1123	TRUE	2.74078	0.0167123	-0.202715	0.860511	0.187894	-0.00850918	0.00403454	2.85356e-19	0.954385	0.258677	5.42955e-11	0.482192	0.0128815	0.48945	0.789238
70	Triglycerides	isovalerylcarnitine (C5)	1330	TRUE	-1.07205	0.146886	0.20166	0.0665364	-0.0468608	0.00456352	0.0309883	4.20666e-26	0.045167	0.00898095	0.074397	0.481706	0.000670477	1.76325e-26	0.789238
318	Glucose	1-oleoyl-2-docosahexaenoyl-GPC (18:1/22:6)*	1207	TRUE	1.33555	0.00170685	0.0258308	-0.0347173	-0.0159742	0.00221297	0.0064493	3.20828e-295	0.946607	0.198242	0.00447062	0.481067	3.20971e-07	2.05502e-18	0.789238
350	HDL	1,2-dipalmitoyl-GPC (16:0/16:0)	1123	TRUE	1.86506	0.0115986	-0.0839184	0.528619	-0.0948452	0.00615004	-0.0338923	1.59493e-37	0.935204	0.312348	1.51294e-14	0.480019	0.000102273	7.81798e-36	0.789238
372	Glucose	stearoyl sphingomyelin (d18:1/18:0)	1207	TRUE	1.31671	-0.0427445	0.0228575	-0.0218049	0.0245591	0.00196384	0.00727215	1.15605e-266	0.256092	0.258547	0.201491	0.477275	4.93884e-06	1.56811e-24	0.789238
86	Tot-cholesterol	choline phosphate	1079	TRUE	5.76894	0.0529983	-0.238583	0.226031	0.0940462	-0.00204486	-0.00942357	2.88439e-76	0.741953	0.250482	0.00105464	0.477657	0.599486	0.153258	0.789238
369	Triglycerides	3-methylglutaconate	1309	TRUE	-1.08535	0.0578265	0.211501	0.0475882	0.0407665	0.00462214	0.0319375	2.33492e-25	0.408411	0.00776473	0.102004	0.486046	0.000532856	2.66638e-28	0.789671
370	Glucose	1-palmitoyl-2-linoleoyl-GPC (16:0/18:2)	1207	TRUE	1.30558	-0.0465291	0.0238076	-0.00902863	0.0297398	0.00193716	0.00722637	6.8293e-201	0.285746	0.240034	0.675757	0.486163	7.79605e-06	4.7568e-24	0.789671
277	Glucose	1-myristoyl-2-linoleoyl-GPC (14:0/18:2)*	1207	TRUE	1.28442	-0.0309038	0.0243515	0.00795802	0.0140239	0.00199244	0.00722883	3.0211e-272	0.172121	0.228467	0.452832	0.490199	3.91521e-06	2.70142e-24	0.79062
250	Tot-cholesterol	2-methylbutyrylcarnitine (C5)	1117	TRUE	6.03824	0.0116598	-0.230392	0.0423003	0.126422	-0.00117384	-0.014837	8.49617e-88	0.957272	0.248639	0.656374	0.490301	0.761648	0.0265499	0.79062
299	Glucose	methylsuccinate	1205	TRUE	1.27838	-0.00301486	0.0199031	0.0192972	-0.0118443	0.00186559	0.00725452	7.29431e-297	0.885417	0.324534	0.0205779	0.490872	1.44176e-05	1.56543e-24	0.79062
209	Glucose	3-methyl-2-oxobutyrate	1207	TRUE	1.28567	-0.0030188	0.0244781	0.0171454	-0.00931917	0.00175556	0.00712792	8.84596e-308	0.888927	0.224176	0.0143384	0.494217	5.07733e-05	9.60557e-24	0.79378
163	Glucose	3-methylglutaconate	1179	TRUE	1.27373	-0.00489869	0.0103467	0.0251516	-0.0098555	0.0018904	0.00710417	1.90721e-296	0.794288	0.615339	0.000453647	0.495595	1.31746e-05	1.78102e-23	0.79378
461	HDL	leucine	1122	TRUE	2.87227	-0.218097	-0.143263	-0.497213	0.133128	0.00661064	-0.0331987	1.76663e-73	0.281557	0.0907267	2.31167e-06	0.497135	4.21876e-05	5.74295e-32	0.794036
416	Triglycerides	3-methyl-2-oxobutyrate	1328	TRUE	-1.06066	0.134711	0.200634	-0.00585937	-0.0379679	0.00519406	0.0319105	8.20175e-26	0.012786	0.00947903	0.835522	0.506396	0.000121094	1.15141e-28	0.804784
289	LDL	sphingosine	1042	TRUE	3.74973	0.109626	-0.12332	0.110952	0.0991712	-0.0108245	0.0015958	5.84499e-38	0.504946	0.515134	0.113867	0.506664	0.0029911	0.794987	0.804784
40	Triglycerides	1-palmitoyl-2-adrenoyl-GPC (16:0/22:4)*	1329	TRUE	-1.12273	0.143109	0.188349	0.314014	-0.0336023	0.00306158	0.0260179	2.46237e-33	0.0132407	0.00765533	1.93608e-31	0.514662	0.0117835	1.39785e-22	0.808995
9	Triglycerides	sphingomyelin (d18:1/18:1, d18:2/18:0)	1330	TRUE	-1.02841	0.0241135	0.204479	-0.0337994	0.075644	0.00513753	0.0319464	2.55225e-20	0.844398	0.00822236	0.614161	0.514943	0.000130274	5.44451e-27	0.808995
125	HDL	sphingosine 1-phosphate	1123	TRUE	2.3497	0.0164558	-0.127347	0.0911363	-0.10046	0.00690968	-0.0367481	9.44404e-55	0.915167	0.136286	0.260027	0.514017	2.27963e-05	9.94627e-40	0.808995
503	Glucose	mannose	1206	TRUE	1.22363	-0.000338947	0.0211369	0.13294	-0.0163135	0.00181077	0.00460627	0	0.990819	0.257868	5.80246e-29	0.513614	5.2872e-06	2.04885e-11	0.808995
497	LDL	1-stearoyl-2-docosapentaenoyl-GPC (18:0/22:5n6)*	1121	TRUE	3.39313	0.305749	-0.205313	0.288906	-0.0806429	-0.00878892	0.00164779	1.09755e-32	0.0635488	0.261664	3.48975e-05	0.516981	0.0118163	0.784383	0.809368
281	LDL	behenoyl sphingomyelin (d18:1/22:0)*	1096	TRUE	0.860279	0.435176	-0.017188	2.12544	-0.17455	-0.0010679	0.00888865	0.00272471	0.123034	0.914726	8.12494e-69	0.517995	0.731767	0.0906415	0.809368
339	Glucose	1-palmitoyl-2-linoleoyl-GPI (16:0/18:2)	1141	TRUE	1.31648	-0.0311465	0.0260886	-0.00649086	0.0126614	0.00176022	0.0071661	1.19244e-280	0.170428	0.2056	0.563133	0.536608	8.18758e-05	3.0734e-22	0.817864
93	LDL	oleoyl-linoleoyl-glycerol (18:1/18:2) [2]	1122	TRUE	3.55668	0.11998	-0.195501	0.177004	0.0784444	-0.00907666	0.00189597	5.74106e-37	0.441753	0.286759	0.00548308	0.529752	0.00945587	0.75402	0.817864
331	Triglycerides	behenoyl sphingomyelin (d18:1/22:0)*	1302	TRUE	-1.39561	0.1916	0.202446	0.299406	-0.0822896	0.00511987	0.0327253	1.67208e-32	0.171052	0.0081532	1.37987e-06	0.530526	0.000100377	3.24342e-30	0.817864
418	LDL	1-myristoyl-2-palmitoyl-GPC (14:0/16:0)	1123	TRUE	3.23429	0.13379	-0.146376	0.356876	0.0816775	-0.00904644	0.00582018	7.81428e-30	0.405762	0.418646	1.07407e-07	0.530896	0.00872494	0.322723	0.817864
366	HDL	isoleucine	1122	TRUE	2.80704	-0.185223	-0.141825	-0.481524	0.0990408	0.00693214	-0.0316602	1.46562e-83	0.272036	0.0919678	2.30168e-08	0.532027	1.61171e-05	1.01714e-28	0.817864
191	Tot-cholesterol	1-palmitoyl-2-adrenoyl-GPC (16:0/22:4)*	1122	TRUE	5.7239	0.250488	-0.244086	0.51325	-0.0754637	-0.00183722	-0.0224843	1.00233e-82	0.117773	0.204153	6.60329e-15	0.532858	0.618264	0.000392507	0.817864
41	LDL	sphinganine	500	TRUE	3.81548	0.00419726	-0.120548	0.182247	0.148715	-0.00911761	-0.00302068	8.1393e-17	0.987224	0.648083	0.111044	0.534827	0.0879743	0.759123	0.817864
293	HDL	alpha-ketoglutarate	1123	TRUE	2.45412	-0.128548	-0.134664	0.0473016	0.0317785	0.00601575	-0.0376645	5.84303e-80	0.103108	0.115006	0.102133	0.535655	0.000316328	1.77303e-40	0.817864
515	Triglycerides	1-oleoyl-2-docosahexaenoyl-GPC (18:1/22:6)*	1330	TRUE	-1.30401	0.145544	0.166026	0.205012	-0.0501743	0.00415471	0.0354658	6.95738e-32	0.0993504	0.0294898	3.8374e-06	0.538154	0.00158215	3.93682e-34	0.817864
442	HDL	ethylmalonate	1123	TRUE	2.42408	-0.0437378	-0.129179	0.0100906	-0.0312505	0.00686731	-0.036547	1.19296e-76	0.533965	0.131266	0.642475	0.538437	2.60312e-05	2.45826e-39	0.817864
119	Glucose	behenoyl sphingomyelin (d18:1/22:0)*	1176	TRUE	1.29785	-0.0385768	0.0227089	-0.00615411	0.0234382	0.00204171	0.00716559	5.00031e-230	0.329799	0.263391	0.706958	0.539079	3.3978e-06	2.1141e-23	0.817864
215	Triglycerides	sphingomyelin (d18:2/24:1, d18:1/24:2)*	1330	TRUE	-0.885266	0.0260783	0.194208	-0.249917	0.0758117	0.00633124	0.0321775	2.24179e-15	0.839059	0.0111582	0.000139398	0.544339	2.46339e-06	1.45689e-29	0.82151
133	HDL	sphingomyelin (d18:1/24:1, d18:2/24:0)*	1096	TRUE	2.09955	-0.161031	-0.0870201	0.297282	0.0747388	0.00656388	-0.0351936	1.27231e-48	0.232858	0.302208	2.2189e-07	0.543618	5.01509e-05	5.34262e-37	0.82151
569	Triglycerides	N-palmitoyl-sphingosine (d18:1/16:0)	1330	TRUE	-1.32	0.141443	0.214389	0.51508	-0.0592492	0.00128109	0.0302119	8.30699e-39	0.187036	0.00302567	3.86901e-20	0.563802	0.318516	3.44876e-29	0.822808
473	Triglycerides	1-myristoyl-2-linoleoyl-GPC (14:0/18:2)*	1330	TRUE	-1.32658	0.136381	0.205147	0.355572	-0.0401269	0.00427615	0.0296853	6.64445e-41	0.0750066	0.00476517	1.16288e-21	0.562758	0.000579598	4.92784e-28	0.822808
352	Triglycerides	sphingomyelin (d17:1/16:0, d18:1/15:0, d16:1/17:0)*	1330	TRUE	-1.01638	0.170618	0.197835	-0.0629741	-0.0657299	0.00552489	0.031786	1.26313e-19	0.154675	0.0105454	0.275522	0.560322	4.33116e-05	2.55875e-28	0.822808
79	HDL	1-stearoyl-2-docosapentaenoyl-GPC (18:0/22:5n6)*	1121	TRUE	2.42261	-0.0403809	-0.12933	0.00823576	-0.0337205	0.00681543	-0.0362874	8.44577e-74	0.600389	0.130648	0.800863	0.562414	2.99852e-05	5.74264e-38	0.822808
245	HDL	1-palmitoyl-2-linoleoyl-GPI (16:0/18:2)	1066	TRUE	2.56321	-0.0440361	-0.162726	-0.16542	-0.0447855	0.00629403	-0.0334107	1.04979e-75	0.614511	0.0559643	0.000101124	0.562186	0.000168325	2.89944e-31	0.822808
175	Glucose	1-margaroyl-2-oleoyl-GPC (17:0/18:1)*	1207	TRUE	1.29218	4.95072e-05	0.0229357	0.00272091	-0.015471	0.00194626	0.00725538	5.3568e-265	0.998676	0.257497	0.841087	0.559496	6.89669e-06	1.00177e-23	0.822808
211	HDL	methylsuccinate	1120	TRUE	2.43765	-0.0381766	-0.127564	-0.00677223	-0.0399262	0.00699806	-0.0365772	2.86413e-75	0.64064	0.136317	0.837519	0.550162	1.79027e-05	1.39491e-39	0.822808
547	Glucose	1-palmitoyl-2-stearoyl-GPC (16:0/18:0)	1207	TRUE	1.32388	-0.0356925	0.0234302	-0.0219855	0.0183597	0.00193063	0.00706425	7.00519e-246	0.280728	0.245961	0.168159	0.557841	7.03186e-06	1.29103e-22	0.822808
371	HDL	sphinganine	500	TRUE	2.35584	-0.10731	-0.0950001	-0.0510511	0.060777	0.00672534	-0.0327851	1.32325e-32	0.343859	0.405606	0.30204	0.557563	0.00361646	1.41717e-14	0.822808
129	Triglycerides	lactate	1330	TRUE	-1.17819	0.168748	0.199113	0.142998	-0.059339	0.00509629	0.0305498	5.56554e-27	0.120703	0.0094518	0.00396718	0.554121	0.000100901	3.88194e-26	0.822808
323	Glucose	2-hydroxy-3-methylvalerate	1207	TRUE	1.27189	-0.00408329	0.0224266	0.0286565	-0.0109937	0.00196829	0.00684034	2.78359e-303	0.855878	0.262545	8.8088e-05	0.553532	3.72267e-06	6.84432e-22	0.822808
66	LDL	fumarate	1123	TRUE	3.87798	0.0573746	-0.186396	-0.324279	0.157274	-0.00789754	0.00658776	1.97926e-39	0.832938	0.310554	0.0141139	0.546966	0.0260063	0.271358	0.822808
252	LDL	valine	1123	TRUE	3.30675	-0.0527657	-0.185627	0.432392	0.257049	-0.00873752	0.00106079	6.80018e-22	0.908121	0.313098	0.0663393	0.558229	0.0128233	0.865379	0.822808
262	Tot-cholesterol	1-palmitoyl-2-oleoyl-GPE (16:0/18:1)	1079	TRUE	5.92966	0.108825	-0.248828	0.0352193	0.0531575	0.00111291	-0.0165326	9.8899e-82	0.44613	0.209972	0.464304	0.578051	0.775478	0.0142907	0.823014
271	Triglycerides	isobutyrylcarnitine (C4)	1330	TRUE	-1.06551	0.132678	0.199048	-0.0212882	-0.0253944	0.00554728	0.0320736	1.80888e-25	0.0268507	0.0102579	0.378811	0.578982	3.0296e-05	1.10947e-28	0.823014
330	Tot-cholesterol	3-methylglutaconate	1097	TRUE	6.23539	0.0832377	-0.14396	-0.389079	0.0721294	0.00175688	-0.0105713	1.84987e-94	0.618637	0.475442	1.28406e-09	0.575283	0.641297	0.09808	0.823014
415	LDL	3-methyl-2-oxovalerate	1123	TRUE	3.79062	0.323336	-0.187316	-0.137171	-0.0803681	-0.00866628	0.00636477	2.69842e-39	0.12098	0.309341	0.0660019	0.582367	0.0136098	0.287403	0.823014
291	Triglycerides	3-methyl-2-oxovalerate	1330	TRUE	-1.06778	0.128233	0.204831	0.0255713	-0.0342877	0.00486915	0.0319214	7.48559e-26	0.0233302	0.00819022	0.414041	0.582551	0.000349445	1.54686e-28	0.823014
553	LDL	sphingomyelin (d18:2/16:0, d18:1/16:1)*	1123	TRUE	1.63765	0.403082	0.0445544	2.32966	-0.140731	-0.0117133	-0.00631182	6.53436e-10	0.141522	0.776323	3.8267e-76	0.579726	8.73991e-05	0.218189	0.823014
572	HDL	valine	1123	TRUE	2.93194	-0.191962	-0.139042	-0.597908	0.111786	0.00658308	-0.031465	1.75073e-77	0.358892	0.0987167	2.88639e-08	0.577953	4.18037e-05	4.33734e-28	0.823014
218	Triglycerides	1-stearoyl-2-arachidonoyl-GPE (18:0/20:4)	1330	TRUE	-1.17106	0.0671721	0.117542	0.479568	0.0308838	0.00150725	0.0246827	8.35261e-44	0.262085	0.0682529	1.55818e-71	0.574518	0.176484	1.6504e-24	0.823014
202	Triglycerides	1-margaroyl-2-oleoyl-GPC (17:0/18:1)*	1330	TRUE	-1.30609	0.153784	0.186473	0.343614	-0.0550787	0.00246631	0.0336251	2.60225e-35	0.133559	0.0127033	2.92309e-11	0.573429	0.0635074	2.2258e-33	0.823014
278	Tot-cholesterol	fumarate	1123	TRUE	6.19514	0.000320519	-0.230747	-0.258014	0.159225	0.000269629	-0.0125862	5.36737e-84	0.99913	0.245517	0.0707388	0.572635	0.943944	0.0518562	0.823014
351	Glucose	ribonate	1205	TRUE	1.27399	-0.0018243	0.0256594	0.049568	-0.0113628	0.00165826	0.00667027	2.51616e-306	0.935462	0.196293	2.24879e-07	0.570744	9.71894e-05	4.09383e-21	0.823014
560	Triglycerides	1-stearoyl-2-dihomo-linolenoyl-GPC (18:0/20:3n3 or 6)*	1330	TRUE	-1.14233	0.160768	0.195584	0.602309	-0.0426486	0.000935636	0.0200383	1.80315e-37	0.0372768	0.0036962	4.36719e-53	0.567841	0.426151	8.99029e-15	0.823014
557	Glucose	1-palmitoyl-2-eicosapentaenoyl-GPC (16:0/20:5)*	1207	TRUE	1.28888	-0.00777198	0.0234962	0.00469334	-0.00673857	0.00192515	0.00730728	1.58452e-300	0.665294	0.245328	0.426672	0.575521	8.9509e-06	1.55851e-24	0.823014
263	Tot-cholesterol	1-stearoyl-2-linoleoyl-GPE (18:0/18:2)*	1122	TRUE	5.74321	0.0743981	-0.232701	0.309598	0.0654271	0.000512905	-0.0198074	1.04285e-80	0.648819	0.235045	6.63029e-07	0.59053	0.890998	0.00219956	0.82323
424	Triglycerides	isovalerylglycine	1329	TRUE	-1.121	0.0586956	0.205825	0.0564931	0.0310733	0.00537719	0.031362	4.43187e-28	0.392197	0.00708131	0.0841216	0.585814	3.67351e-05	5.25218e-28	0.82323
226	Glucose	sphingosine 1-phosphate	1206	TRUE	1.26467	0.00538995	0.0239396	0.0310537	-0.0220766	0.00196819	0.0071865	1.61203e-224	0.894603	0.235944	0.135206	0.585915	4.76117e-06	6.49655e-24	0.82323
4	Triglycerides	sphingomyelin (d18:1/20:0, d16:1/22:0)*	1302	TRUE	-1.27033	0.0300127	0.195254	0.209245	0.0712724	0.00461254	0.0327539	2.02825e-28	0.827211	0.0106085	0.00104272	0.587479	0.000493563	1.45169e-29	0.82323
521	HDL	1-stearoyl-2-docosapentaenoyl-GPC (18:0/22:5n3)*	1123	TRUE	2.27773	-0.024737	-0.140576	0.160872	-0.0470479	0.00621793	-0.0362576	3.69839e-63	0.819607	0.0981441	0.000171976	0.590724	0.000133485	2.74941e-39	0.82323
59	HDL	3-methylglutaconate	1097	TRUE	2.46337	-0.115548	-0.134094	-0.079811	0.030149	0.00741378	-0.0354244	7.60953e-78	0.113113	0.127472	0.00430948	0.591294	6.55543e-06	5.21157e-37	0.82323
157	Triglycerides	phosphatidylcholine (18:0/20:5, 16:0/22:5n6)*	1330	TRUE	-1.0869	0.135864	0.206628	0.12408	-0.0324638	0.00333121	0.0318245	5.58769e-27	0.0521875	0.00679021	3.68017e-05	0.610084	0.0151672	3.65488e-29	0.827394
355	Triglycerides	arabonate/xylonate	1330	TRUE	-1.08589	0.0611845	0.199094	0.0664403	0.0364601	0.00450772	0.0313724	8.33348e-26	0.464977	0.0100444	0.0620893	0.611026	0.000745563	1.8825e-27	0.827394
404	LDL	N-acetylvaline	1123	TRUE	3.64364	0.0638682	-0.193577	0.0503542	0.148456	-0.00938064	0.00466966	1.05581e-33	0.83057	0.294258	0.749017	0.60376	0.00792796	0.447382	0.827394
391	LDL	oleoyl-linoleoyl-glycerol (18:1/18:2) [1]	1122	TRUE	3.63975	0.144044	-0.188672	0.0438796	0.0637688	-0.00911171	0.00427845	1.81946e-38	0.358745	0.306274	0.494168	0.611552	0.009593	0.483105	0.827394
148	Tot-cholesterol	N-palmitoyl-sphingosine (d18:1/16:0)	1123	TRUE	4.12202	0.254248	-0.129351	1.97229	-0.121755	-0.00550626	-0.010942	1.55381e-46	0.346429	0.45601	1.44001e-61	0.611503	0.0970397	0.0526748	0.827394
506	Glucose	phosphatidylcholine (18:0/20:5, 16:0/22:5n6)*	1207	TRUE	1.29077	-0.00728439	0.0232196	0.00331052	-0.00741937	0.00193967	0.00727781	5.31556e-298	0.717274	0.250787	0.640714	0.608549	7.49379e-06	2.07284e-24	0.827394
321	Glucose	sphinganine-1-phosphate	1076	TRUE	1.28834	-0.00201396	0.0393547	0.0193031	-0.0137854	0.00181774	0.00704772	1.55184e-256	0.943299	0.0643739	0.137495	0.600421	5.80974e-05	1.26024e-21	0.827394
94	Glucose	galactonate	1100	TRUE	1.32259	-0.0118824	0.0307119	-0.00176039	-0.0038931	0.00191492	0.00630159	2.27413e-305	0.376094	0.152645	0.623451	0.606069	1.59615e-05	6.37199e-17	0.827394
207	Tot-cholesterol	1-stearoyl-2-docosahexaenoyl-GPC (18:0/22:6)	1123	TRUE	5.28625	0.269449	-0.256339	0.821975	-0.0886491	-0.00699207	-0.00730229	8.13037e-71	0.197766	0.175231	6.03926e-23	0.599407	0.0556704	0.236598	0.827394
170	HDL	1-palmitoyl-2-docosahexaenoyl-GPC (16:0/22:6)	1123	TRUE	2.09113	-0.0401151	-0.109236	0.296641	-0.0421439	0.00521423	-0.0321611	2.9104e-54	0.676354	0.189509	1.00849e-12	0.599121	0.00113685	2.50577e-31	0.827394
231	LDL	2-methylbutyrylcarnitine (C5)	1117	TRUE	3.66504	0.110156	-0.19385	0.0964099	0.0896503	-0.0100037	0.00321375	9.00086e-39	0.584452	0.294385	0.273093	0.59717	0.00523766	0.603734	0.827394
480	HDL	phosphate	1123	TRUE	2.43064	0.110926	-0.128724	0.00601928	-0.193996	0.00691215	-0.0366366	8.77072e-27	0.769421	0.132362	0.973935	0.608032	2.34906e-05	1.38368e-39	0.827394
511	HDL	pyruvate	1122	TRUE	2.4382	-0.107323	-0.143938	-0.012785	0.015856	0.00700068	-0.0361376	6.64774e-79	0.0686013	0.0979663	0.442504	0.616742	2.07172e-05	7.01585e-37	0.830425
153	Glucose	sphingomyelin (d18:1/21:0, d17:1/22:0, d16:1/23:0)*	1207	TRUE	1.306	-0.00124892	0.0224792	-0.00729556	-0.0148457	0.00192336	0.00719588	4.67307e-264	0.969226	0.266339	0.585469	0.616886	7.83724e-06	5.80363e-24	0.830425
333	Triglycerides	alpha-hydroxyisovalerate	1330	TRUE	-1.13594	0.139078	0.19526	0.108255	-0.0300677	0.00507642	0.0301778	1.89514e-28	0.053864	0.0103509	0.000269263	0.618125	9.36518e-05	5.69538e-26	0.830425
403	HDL	fumarate	1123	TRUE	2.42377	-0.142728	-0.129068	0.0282465	0.0596937	0.00665476	-0.0366205	8.85714e-70	0.259177	0.13107	0.645723	0.623015	5.49304e-05	1.74832e-39	0.833101
445	Tot-cholesterol	galactonate	1024	TRUE	5.88734	0.121234	-0.237418	-0.0275347	0.0337192	3.69581e-05	-0.00850568	4.5973e-78	0.318967	0.246821	0.385064	0.622282	0.99249	0.215776	0.833101
220	HDL	choline phosphate	1079	TRUE	2.31708	-0.115576	-0.0727131	0.0912081	0.0277689	0.00680129	-0.035395	8.54122e-66	0.0975206	0.418926	0.00227366	0.628446	5.56701e-05	3.42025e-35	0.838414
258	Triglycerides	sphingosine 1-phosphate	1330	TRUE	-0.943616	0.153343	0.191436	-0.160075	-0.0587859	0.00546558	0.0329049	3.90046e-17	0.219776	0.0130276	0.0087586	0.631342	3.37409e-05	3.79654e-30	0.840328
336	LDL	glycerophosphoethanolamine	1123	TRUE	3.45399	0.143981	-0.188791	0.137452	0.066825	-0.00863572	0.00622663	2.60316e-32	0.396786	0.304294	0.0375012	0.636496	0.0138795	0.298009	0.845232
139	HDL	oleoyl-linoleoyl-glycerol (18:1/18:2) [1]	1122	TRUE	2.58038	-0.0388848	-0.111794	-0.329888	-0.0243725	0.00730084	-0.0295252	4.54199e-103	0.561342	0.155247	1.91969e-33	0.649052	1.14011e-06	7.69494e-30	0.852067
335	LDL	1-palmitoyl-2-docosahexaenoyl-GPE (16:0/22:6)*	1123	TRUE	3.60307	0.285651	-0.196164	0.0548349	-0.0579335	-0.00944919	0.00582125	6.50085e-37	0.0937732	0.287854	0.405891	0.64835	0.00778384	0.331575	0.852067
314	LDL	3-methylglutaconate	1097	TRUE	3.87563	0.157781	-0.106987	-0.345325	0.0552512	-0.0071124	0.00747262	1.75632e-43	0.308676	0.567184	6.18136e-09	0.643338	0.0418684	0.2071	0.852067
288	LDL	phosphatidylcholine (18:0/20:5, 16:0/22:5n6)*	1123	TRUE	3.36603	0.14857	-0.182606	0.28338	0.0550844	-0.0116164	0.00869465	7.69967e-33	0.373975	0.314577	6.92841e-07	0.647626	0.000874861	0.142261	0.852067
406	HDL	lactate	1123	TRUE	2.53717	-0.140179	-0.130019	-0.152699	0.0570738	0.00703479	-0.035145	1.93013e-77	0.25365	0.127345	0.0153499	0.648109	1.54669e-05	1.77331e-35	0.852067
356	HDL	1-stearoyl-2-arachidonoyl-GPI (18:0/20:4)	1122	TRUE	2.59527	-0.0226809	-0.113024	-0.168873	-0.0520379	0.00676357	-0.0353719	2.87078e-76	0.866395	0.18466	0.00293058	0.662891	3.15784e-05	6.77715e-37	0.852712
167	Triglycerides	sphingomyelin (d18:1/14:0, d16:1/16:0)*	1330	TRUE	-1.13347	0.151836	0.21166	0.122835	-0.0511179	0.00425972	0.0317695	1.56301e-25	0.212573	0.00615475	0.0362175	0.662509	0.00195885	2.60288e-28	0.852712
47	LDL	1-stearoyl-2-oleoyl-GPC (18:0/18:1)	1123	TRUE	2.76595	0.31611	-0.257444	0.7796	-0.0824475	-0.00796297	0.00402315	3.29443e-21	0.143608	0.14884	8.10905e-15	0.661888	0.0192253	0.488696	0.852712
389	Triglycerides	1-stearoyl-2-docosapentaenoyl-GPC (18:0/22:5n6)*	1329	TRUE	-1.19133	0.126594	0.167607	0.3439	-0.0260941	0.00329441	0.0273303	1.71011e-35	0.0509182	0.0198697	6.17322e-27	0.66049	0.0076844	4.05937e-24	0.852712
381	LDL	sphingosine 1-phosphate	1123	TRUE	3.82131	0.0735945	-0.191405	-0.176175	0.145123	-0.00918452	0.0059599	6.66291e-32	0.825116	0.299	0.312544	0.66192	0.00901777	0.321071	0.852712
223	Triglycerides	phosphate	1330	TRUE	-1.22873	-0.0454715	0.202388	0.166883	0.147783	0.00513028	0.0319529	3.41472e-09	0.891792	0.0087836	0.347158	0.658672	0.000106214	9.76324e-29	0.852712
268	Triglycerides	1-stearoyl-2-docosapentaenoyl-GPC (18:0/22:5n3)*	1330	TRUE	-1.17599	0.0667688	0.17906	0.387278	0.03634	0.000844313	0.0305056	3.39051e-34	0.428857	0.0127616	2.3386e-22	0.658016	0.511008	3.70636e-30	0.852712
428	Glucose	1-palmitoyl-2-oleoyl-GPI (16:0/18:1)*	1144	TRUE	1.29073	-0.00524292	0.0317663	0.0138399	-0.00935918	0.00179554	0.00721714	2.11661e-276	0.820603	0.1227	0.203696	0.657793	4.94628e-05	6.9475e-23	0.852712
19	Triglycerides	alpha-ketoglutarate	1330	TRUE	-1.05671	0.0785333	0.202647	0.000176471	0.0273064	0.00502086	0.0319591	1.33542e-25	0.195242	0.00894488	0.995465	0.658881	0.000222127	2.87084e-28	0.852712
283	Triglycerides	N-acetylvaline	1330	TRUE	-1.2121	0.152035	0.200691	0.280564	-0.054911	0.00424416	0.0286771	5.72006e-28	0.251839	0.00847973	6.81761e-05	0.665351	0.00122991	1.22027e-22	0.853966
439	Tot-cholesterol	3-hydroxyisobutyrate	1106	TRUE	5.98919	0.0963149	-0.255099	0.0625236	0.0458961	-0.00140009	-0.0136365	1.51188e-83	0.54646	0.215942	0.322692	0.670839	0.716358	0.0364344	0.859092
128	Glucose	sphingosine	1125	TRUE	1.29265	-0.0241465	0.0303928	0.0119911	0.00840155	0.00194024	0.00687305	6.12083e-277	0.260134	0.149105	0.201251	0.672339	2.07514e-05	2.84172e-20	0.859099
446	LDL	methylsuccinate	1120	TRUE	3.61634	0.156728	-0.198093	0.0759642	0.0594477	-0.00974081	0.00498473	3.12297e-37	0.369627	0.278825	0.281535	0.677042	0.00518608	0.400948	0.861281
254	Tot-cholesterol	1-stearoyl-2-docosahexaenoyl-GPE (18:0/22:6)*	1123	TRUE	5.94486	0.216022	-0.275678	0.228744	-0.0502618	-0.00298284	-0.0159203	7.34177e-87	0.202574	0.163581	0.000153892	0.67677	0.433691	0.0136152	0.861281
328	HDL	1-stearoyl-2-docosahexaenoyl-GPC (18:0/22:6)	1123	TRUE	2.28999	-0.0456754	-0.133856	0.164919	-0.031012	0.0056413	-0.0353866	1.93413e-66	0.625714	0.113794	9.83733e-06	0.681442	0.000563328	1.41895e-37	0.86306
192	Triglycerides	2-methylcitrate/homocitrate	1296	TRUE	-1.10053	0.118167	0.205626	0.0771278	-0.0319513	0.00499619	0.0305653	3.66237e-24	0.179361	0.00905709	0.056756	0.680033	0.000166997	4.07244e-26	0.86306
103	Triglycerides	1-stearoyl-2-docosahexaenoyl-GPE (18:0/22:6)*	1330	TRUE	-0.963318	0.0754185	0.127589	0.393055	0.0171906	-0.001149	0.0250834	3.27555e-31	0.132421	0.0441756	3.20529e-80	0.685406	0.304891	3.53643e-26	0.866172
64	Triglycerides	1-stearoyl-2-arachidonoyl-GPC (18:0/20:4)	1330	TRUE	-1.17477	0.140278	0.177304	0.28277	-0.0358352	0.00321114	0.0295949	1.26821e-30	0.12249	0.0188954	1.83082e-09	0.688144	0.0151157	9.28417e-26	0.866348
21	LDL	1,2-dipalmitoyl-GPC (16:0/16:0)	1123	TRUE	2.01241	0.0884339	-0.0445426	1.51687	0.111714	-0.0114114	0.0137182	3.36102e-11	0.766081	0.796889	3.46529e-26	0.689698	0.000540392	0.0151997	0.866348
319	Glucose	sphingomyelin (d17:1/16:0, d18:1/15:0, d16:1/17:0)*	1207	TRUE	1.33171	-0.0046171	0.0198922	-0.0315991	-0.01179	0.00200594	0.00700233	8.42703e-285	0.886153	0.323294	0.0206705	0.690398	2.84619e-06	8.11254e-23	0.866348
228	HDL	1-oleoyl-2-docosahexaenoyl-GPC (18:1/22:6)*	1123	TRUE	2.05769	-0.0551401	-0.138814	0.312394	-0.0338782	0.00512499	-0.0304624	1.31486e-50	0.568085	0.0961803	1.38977e-11	0.69203	0.00144777	5.09381e-27	0.866348
25	Triglycerides	phosphatidylcholine (16:0/22:5n3, 18:1/20:4)*	1330	TRUE	-1.36967	0.141315	0.166475	0.419233	-0.0433598	0.00288693	0.0328309	2.46516e-37	0.198538	0.0251904	1.89513e-13	0.693079	0.0259712	1.87864e-32	0.866348
349	HDL	isovalerylcarnitine (C5)	1121	TRUE	2.47376	-0.104218	-0.130235	-0.0946208	0.0249033	0.00721818	-0.0349599	8.70352e-81	0.181237	0.126619	0.0114118	0.698058	9.66876e-06	3.04077e-35	0.868404
499	Tot-cholesterol	tricosanoyl sphingomyelin (d18:1/23:0)*	825	TRUE	5.12126	0.28767	-0.253558	0.71497	-0.0799916	0.000470005	-0.0113546	1.23547e-46	0.214525	0.24327	2.84185e-14	0.698897	0.911779	0.113758	0.868404
313	LDL	tricosanoyl sphingomyelin (d18:1/23:0)*	825	TRUE	2.91086	0.350431	-0.249481	0.604188	-0.0746254	-0.00943137	0.00949975	2.60818e-18	0.105491	0.218983	6.03261e-12	0.699254	0.0173086	0.15662	0.868404
42	Triglycerides	sphingomyelin (d18:2/16:0, d18:1/16:1)*	1330	TRUE	-1.07692	0.050662	0.202884	0.0588661	0.0493592	0.00467549	0.0312095	6.39773e-22	0.709927	0.00873639	0.411555	0.708266	0.0006386	4.54195e-26	0.876187
217	HDL	palmitoyl-linoleoyl-glycerol (16:0/18:2) [2]*	1058	TRUE	2.42179	-0.04974	-0.170198	-0.25939	-0.0181657	0.00727569	-0.0278863	4.62844e-88	0.38467	0.0358752	1.44067e-24	0.708569	1.87501e-06	2.60793e-25	0.876187
3	Triglycerides	1-palmitoyl-2-stearoyl-GPC (16:0/18:0)	1330	TRUE	-1.3774	0.133254	0.190395	0.367968	-0.037586	0.0037476	0.032505	2.79186e-35	0.249301	0.0104327	4.90851e-10	0.730757	0.00348982	8.65865e-32	0.880892
55	Triglycerides	1-stearoyl-2-docosahexaenoyl-GPC (18:0/22:6)	1330	TRUE	-1.14604	0.130634	0.193546	0.227827	-0.0274793	0.00225802	0.0325148	6.09246e-30	0.114437	0.0101202	3.58681e-09	0.729301	0.0975448	4.12689e-31	0.880892
17	Tot-cholesterol	oleoyl-linoleoyl-glycerol (18:1/18:2) [1]	1122	TRUE	6.01414	0.10748	-0.230395	0.00312016	0.0469606	-0.000633792	-0.0135943	1.38274e-87	0.526142	0.247485	0.964105	0.729186	0.86753	0.0391156	0.880892
134	HDL	succinylcarnitine (C4-DC)	1100	TRUE	2.45835	-0.121247	-0.0947391	-0.197382	0.0347751	0.00831441	-0.0328807	5.67083e-80	0.275021	0.284829	0.000221251	0.728968	6.81532e-07	4.11986e-30	0.880892
138	Glucose	sphingomyelin (d18:1/14:0, d16:1/16:0)*	1207	TRUE	1.32471	-0.0278999	0.0217272	-0.026548	0.0100498	0.00195824	0.00719392	1.29752e-279	0.380994	0.281411	0.0570478	0.728619	4.95024e-06	3.40072e-24	0.880892
180	Triglycerides	ethylmalonate	1330	TRUE	-1.07511	0.120711	0.202034	0.0272677	-0.0165909	0.00488073	0.0317758	7.79044e-26	0.0463516	0.00903029	0.242099	0.728844	0.000242823	3.05151e-28	0.880892
48	HDL	2-hydroxy-3-methylvalerate	1123	TRUE	2.42564	-0.0526819	-0.13111	0.0078076	-0.0256144	0.00690165	-0.0365317	5.35868e-76	0.549386	0.125812	0.788998	0.72408	2.33335e-05	1.15628e-38	0.880892
447	HDL	2-methylcitrate/homocitrate	1021	TRUE	2.50547	-0.11623	-0.0655606	-0.0974677	0.0330653	0.007551	-0.0370157	1.11204e-70	0.223815	0.491586	0.0559954	0.724453	1.14958e-05	4.33054e-36	0.880892
1	Triglycerides	stearoyl sphingomyelin (d18:1/18:0)	1330	TRUE	-1.13074	0.14566	0.203091	0.110351	-0.0452178	0.00460118	0.0314158	8.36536e-24	0.275344	0.00871468	0.106841	0.723085	0.000678716	3.82101e-27	0.880892
160	LDL	1-stearoyl-2-arachidonoyl-GPE (18:0/20:4)	1123	TRUE	3.69668	0.277563	-0.176181	-0.0788403	-0.0477687	-0.00893173	0.00710616	5.21773e-39	0.11972	0.339663	0.252022	0.721528	0.0111184	0.240429	0.880892
353	Triglycerides	1-stearoyl-2-linoleoyl-GPC (18:0/18:2)*	1330	TRUE	-1.4432	0.0504153	0.200558	0.411983	0.0494372	0.00439761	0.0322751	4.24021e-35	0.716187	0.00722239	1.8256e-09	0.717434	0.000589666	3.40586e-31	0.880892
122	LDL	fructose	1123	TRUE	3.75321	0.132778	-0.179754	-0.114943	0.0823983	-0.00909945	0.00618759	2.83039e-36	0.583655	0.32996	0.337882	0.717254	0.00967122	0.304333	0.880892
280	Triglycerides	1,2-dilinoleoyl-GPC (18:2/18:2)	1330	TRUE	-1.10692	0.0746098	0.203898	0.0264726	0.0255886	0.00515975	0.0325309	1.12592e-21	0.379786	0.00834983	0.501092	0.735697	9.22203e-05	1.33834e-28	0.884991
426	HDL	phosphatidylcholine (18:0/20:5, 16:0/22:5n6)*	1123	TRUE	2.253	-0.0583239	-0.125501	0.176717	-0.0184968	0.0054723	-0.0348021	1.20966e-67	0.447741	0.132721	1.66534e-11	0.738494	0.000649137	2.21652e-37	0.886501
384	Glucose	1-stearoyl-2-linoleoyl-GPI (18:0/18:2)	1198	TRUE	1.31244	-0.00758343	0.0250293	-0.00743793	-0.00889511	0.00177447	0.00726436	9.96696e-262	0.783445	0.222063	0.603173	0.743292	3.73129e-05	6.0355e-25	0.888551
566	Tot-cholesterol	trimethylamine N-oxide	1123	TRUE	5.99324	0.190657	-0.230774	0.0162999	-0.020381	-0.000725109	-0.0133204	2.52709e-87	0.106056	0.246548	0.648383	0.742929	0.8489	0.0394334	0.888551
383	Glucose	isobutyrylglycine	1195	TRUE	1.25523	-0.0100294	0.0218123	0.0448801	-0.00590527	0.00201626	0.00692913	1.93544e-284	0.608203	0.273777	1.48834e-06	0.748062	2.20621e-06	1.09609e-22	0.889982
410	Tot-cholesterol	isobutyrylcarnitine (C4)	1119	TRUE	6.02605	0.124632	-0.224674	-0.0653523	0.0331792	0.000428741	-0.0135617	2.63754e-87	0.391356	0.260244	0.257653	0.751196	0.910787	0.0369779	0.889982
510	Glucose	sphingomyelin (d18:2/14:0, d18:1/14:1)*	1191	TRUE	1.32428	-0.00782921	0.0270822	-0.0410523	-0.00760245	0.00190906	0.00787296	0	0.773996	0.174451	0.000916492	0.752213	5.31046e-06	8.9694e-29	0.889982
69	HDL	palmitoyl sphingomyelin (d18:1/16:0)	1123	TRUE	1.72536	-0.0218174	-0.0687029	0.614928	-0.0580157	0.00643428	-0.0325159	1.69932e-26	0.908959	0.412065	6.9871e-12	0.752611	5.28411e-05	5.52811e-32	0.889982
213	Triglycerides	glycerophosphoethanolamine	1330	TRUE	-1.2789	0.120682	0.195286	0.216634	-0.0181809	0.00473706	0.0317978	1.92023e-36	0.083897	0.00859995	2.66346e-13	0.753338	0.000192509	1.27774e-30	0.889982
251	HDL	tiglylcarnitine (C5:1-DC)	1116	TRUE	2.42115	-0.114365	-0.132197	0.000166057	0.0271038	0.00709977	-0.0364393	2.42214e-73	0.245076	0.122902	0.99701	0.753776	1.78457e-05	5.42957e-39	0.889982
436	Glucose	1,2-dipalmitoyl-GPC (16:0/16:0)	1207	TRUE	1.31059	-0.00505792	0.0218584	-0.0137118	-0.0111786	0.00196884	0.0071528	8.4419e-242	0.895145	0.280333	0.454832	0.757886	4.82346e-06	2.09754e-23	0.891426
77	Tot-cholesterol	methylsuccinate	1120	TRUE	6.00476	0.114005	-0.234942	0.0436101	0.0476793	-0.00112436	-0.0140237	7.36549e-85	0.547415	0.236311	0.568807	0.7581	0.766073	0.0293378	0.891426
68	LDL	choline phosphate	1079	TRUE	3.50392	0.174477	-0.239191	0.153061	0.0364752	-0.0102954	0.00823692	1.67028e-33	0.244161	0.215735	0.0170985	0.767271	0.00450302	0.179856	0.89489
123	LDL	N-palmitoyl-sphingosine (d18:1/16:0)	1123	TRUE	2.06253	0.108391	-0.0976414	1.66777	0.0672033	-0.0133084	0.00751832	3.17854e-14	0.670792	0.551274	9.60519e-50	0.76655	2.17268e-05	0.158642	0.89489
199	LDL	pyruvate	1122	TRUE	3.58651	0.242644	-0.126761	-0.120191	-0.0204356	-0.00726948	0.0109775	3.34448e-38	0.0544488	0.496023	0.000744742	0.763176	0.0389274	0.0718217	0.89489
358	Tot-cholesterol	glycerophosphoethanolamine	1123	TRUE	5.62559	0.212771	-0.23139	0.274127	-0.045521	0.000164062	-0.0121176	5.46807e-72	0.243803	0.24121	0.000112944	0.764441	0.965291	0.0593769	0.89489
162	Glucose	tricosanoyl sphingomyelin (d18:1/23:0)*	890	TRUE	1.27489	-0.0178604	0.043391	0.00645107	0.00657507	0.00205511	0.00741488	3.82183e-197	0.516513	0.0692484	0.563647	0.790653	5.96633e-05	6.22999e-19	0.906611
368	Triglycerides	tricosanoyl sphingomyelin (d18:1/23:0)*	1034	TRUE	-1.01617	0.141382	0.23011	0.0191022	-0.0208126	0.00318398	0.0330071	2.85984e-17	0.104925	0.00886748	0.614768	0.783221	0.0274686	5.45994e-25	0.906611
563	HDL	N-acetylleucine	1118	TRUE	2.61417	-0.107891	-0.121182	-0.27418	0.0263524	0.00683939	-0.0332203	2.73687e-85	0.268034	0.150595	1.12675e-07	0.784422	2.25702e-05	2.03037e-32	0.906611
441	Triglycerides	1-palmitoyl-2-oleoyl-GPC (16:0/18:1)	1330	TRUE	-1.40701	0.0703782	0.193349	0.589128	0.031584	0.00226229	0.0284294	1.92458e-43	0.551272	0.00658349	4.0565e-24	0.785886	0.067779	1.16874e-26	0.906611
233	LDL	1-stearoyl-2-docosahexaenoyl-GPE (18:0/22:6)*	1123	TRUE	3.64305	0.175258	-0.200489	0.0685017	0.0303244	-0.0099436	0.00473262	1.52953e-38	0.26748	0.277201	0.223914	0.787333	0.00512614	0.431535	0.906611
205	Tot-cholesterol	1,5-anhydroglucitol (1,5-AG)	1121	TRUE	5.97808	0.100532	-0.23461	0.0425535	0.0623134	-0.000432956	-0.0141745	3.48152e-76	0.675754	0.239977	0.708443	0.788256	0.909542	0.0294991	0.906611
540	Triglycerides	1-palmitoyl-2-arachidonoyl-GPC (16:0/20:4n6)	1330	TRUE	-1.23539	0.129125	0.196289	0.337806	-0.026598	0.00347465	0.0293282	9.04611e-33	0.197917	0.00905896	2.58656e-11	0.789236	0.00770653	1.4496e-25	0.906611
275	HDL	beta-hydroxyisovalerate	1110	TRUE	2.47136	-0.112768	-0.12439	-0.0403899	0.027927	0.00670254	-0.0359312	1.8481e-71	0.322524	0.146825	0.437946	0.78943	4.45121e-05	3.04587e-37	0.906611
114	Tot-cholesterol	oleoyl-linoleoyl-glycerol (18:1/18:2) [2]	1122	TRUE	5.90995	0.110537	-0.240822	0.178282	0.0356801	-0.000672423	-0.0167193	7.13825e-85	0.512181	0.224884	0.00968121	0.791511	0.858855	0.0105938	0.906611
171	LDL	1-palmitoyl-2-adrenoyl-GPC (16:0/22:4)*	1122	TRUE	3.46343	0.254623	-0.196823	0.312828	-0.0299119	-0.00964922	5.86624e-05	7.537e-35	0.093177	0.279393	5.41057e-07	0.794039	0.00570132	0.992206	0.907039
234	Triglycerides	1-margaroyl-2-linoleoyl-GPC (17:0/18:2)*	1330	TRUE	-1.23691	0.129773	0.207398	0.150586	-0.0293083	0.00467206	0.0337463	9.12517e-26	0.275747	0.00726582	0.00627524	0.79504	0.000436947	1.4621e-30	0.907039
124	Triglycerides	fumarate	1330	TRUE	-1.04186	0.129128	0.200037	-0.0279217	-0.0280844	0.00523722	0.0320338	1.43644e-21	0.267367	0.00997576	0.607568	0.800832	9.23914e-05	1.69282e-28	0.911838
188	LDL	1,5-anhydroglucitol (1,5-AG)	1121	TRUE	3.59122	0.170076	-0.18888	0.0685103	0.0484142	-0.00882382	0.00464249	3.8234e-33	0.444487	0.306755	0.514858	0.821588	0.0123626	0.441187	0.919635
429	Glucose	1-stearoyl-2-arachidonoyl-GPC (18:0/20:4)	1207	TRUE	1.296	-0.0229926	0.0232926	-0.000496011	0.00541385	0.00194487	0.0072481	4.52291e-282	0.430166	0.250622	0.966529	0.821055	6.3121e-06	2.3496e-24	0.919635
397	HDL	choline	1123	TRUE	2.55819	-0.123678	-0.131188	-0.143161	0.0440248	0.00703715	-0.036315	8.15035e-64	0.522043	0.12471	0.128096	0.822074	1.61531e-05	6.95315e-39	0.919635
430	Tot-cholesterol	3-methyl-2-oxovalerate	1123	TRUE	6.04828	0.209396	-0.230912	-0.0372945	-0.0358489	-0.000516005	-0.0131189	2.60215e-83	0.353407	0.246903	0.644082	0.820679	0.892018	0.0427424	0.919635
227	Tot-cholesterol	1-stearoyl-2-docosapentaenoyl-GPC (18:0/22:5n3)*	1123	TRUE	4.99977	0.230432	-0.320855	1.04286	-0.0460437	-0.0051294	-0.0115886	3.01299e-63	0.332784	0.0852637	1.20515e-28	0.810377	0.150798	0.0560156	0.919635
304	Glucose	alpha-hydroxyisovalerate	1206	TRUE	1.27682	-0.0113644	0.0234582	0.016572	-0.00417228	0.00201468	0.00707704	7.43594e-289	0.592009	0.244899	0.0455896	0.816522	2.89067e-06	3.65863e-23	0.919635
382	Triglycerides	palmitoyl sphingomyelin (d18:1/16:0)	1330	TRUE	-0.823011	0.146186	0.186548	-0.25617	-0.0401349	0.00590955	0.0309668	5.77828e-10	0.411678	0.0155623	0.00487245	0.81627	9.78016e-06	4.31006e-27	0.919635
417	Glucose	1-palmitoyl-2-arachidonoyl-GPI (16:0/20:4)*	1128	TRUE	1.31553	-0.00713148	0.0130965	-0.00256165	-0.00440231	0.00179274	0.00685039	8.60627e-294	0.757151	0.553366	0.801404	0.814127	4.44664e-05	4.5235e-21	0.919635
543	LDL	1-palmitoyl-2-arachidonoyl-GPE (16:0/20:4)*	1123	TRUE	3.75043	0.253687	-0.1757	-0.112231	-0.0286756	-0.00902898	0.006841	9.702e-40	0.133586	0.339889	0.0792422	0.820441	0.0101103	0.254483	0.919635
92	Glucose	malate	1146	TRUE	1.27329	-0.0194429	0.0230683	0.0287254	0.00427268	0.00176425	0.00735787	5.39191e-293	0.365709	0.260618	0.000468488	0.827285	6.33612e-05	1.85617e-23	0.923668
8	Triglycerides	1-stearoyl-2-oleoyl-GPE (18:0/18:1)	1316	TRUE	-0.976491	0.0794647	0.120386	0.337161	0.00762601	0.00229714	0.0203951	3.93094e-34	0.0753538	0.0467238	4.9025e-83	0.82974	0.0280818	5.04163e-19	0.924613
165	Glucose	succinate	1207	TRUE	1.29939	-0.0236385	0.0233578	-0.00408964	0.00749701	0.00193748	0.00725913	2.8086e-264	0.481313	0.247937	0.795256	0.831712	7.12225e-06	2.06765e-24	0.925018
500	LDL	beta-hydroxyisovalerate	1110	TRUE	3.47567	0.261435	-0.199784	0.218669	-0.0473086	-0.00888188	0.00342363	1.45916e-31	0.286255	0.278612	0.0508724	0.833402	0.0118858	0.572117	0.925108
34	Triglycerides	1-pentadecanoyl-2-linoleoyl-GPC (15:0/18:2)*	1330	TRUE	-1.24198	0.114507	0.216414	0.168924	-0.0182246	0.00477159	0.0329824	5.18936e-29	0.235005	0.00502211	0.000309558	0.836602	0.000296462	2.09224e-30	0.926872
302	HDL	alpha-hydroxyisocaproate	1122	TRUE	2.36198	-0.104643	-0.126188	0.0683108	0.0179205	0.0069993	-0.0368683	1.47356e-66	0.316786	0.139626	0.125438	0.840386	1.78539e-05	5.98331e-40	0.926955
144	Tot-cholesterol	beta-hydroxyisovalerate	1110	TRUE	5.78327	0.206167	-0.242883	0.266809	-0.0487006	-0.000584517	-0.0150915	1.80428e-72	0.43629	0.222759	0.0274067	0.841137	0.878199	0.0211472	0.926955
72	Triglycerides	1,2-dipalmitoyl-GPC (16:0/16:0)	1330	TRUE	-1.24083	0.125079	0.216188	0.234887	-0.0274479	0.00412574	0.0319486	7.38023e-27	0.372987	0.00465985	0.000939377	0.841514	0.0019129	1.9956e-29	0.926955
478	Glucose	choline	1207	TRUE	1.34234	-0.00664552	0.0227029	-0.0543008	-0.00944943	0.00198262	0.0073598	3.51987e-254	0.891621	0.259554	0.0191442	0.848087	3.75117e-06	3.99192e-25	0.930826
460	HDL	1-palmitoyl-2-eicosapentaenoyl-GPC (16:0/20:5)*	1123	TRUE	2.25443	-0.0943699	-0.102527	0.172455	0.00869701	0.00507953	-0.0341208	4.81532e-70	0.163798	0.21438	2.11072e-15	0.848266	0.00137621	1.05229e-36	0.930826
376	HDL	2-methylbutyrylcarnitine (C5)	1117	TRUE	2.44245	-0.100931	-0.117238	-0.108644	0.0143183	0.00778206	-0.0343518	1.17337e-78	0.278325	0.170079	0.00754137	0.85511	2.61492e-06	3.43751e-33	0.936549
105	HDL	1-stearoyl-2-linoleoyl-GPI (18:0/18:2)	1115	TRUE	2.84935	-0.0590657	-0.169117	-0.290015	-0.0180485	0.00499322	-0.0369459	6.2067e-84	0.574815	0.048051	1.89047e-07	0.859073	0.00232613	1.88802e-41	0.937978
338	HDL	1-palmitoyl-2-oleoyl-GPI (16:0/18:1)*	1067	TRUE	2.54213	-0.112769	-0.147436	-0.172136	0.0136359	0.00664107	-0.0331143	1.60362e-75	0.203442	0.0825157	3.85822e-05	0.864573	7.04037e-05	6.34021e-31	0.937978
235	Triglycerides	glycerophosphorylcholine (GPC)	1330	TRUE	-1.17476	0.0825153	0.197897	0.094945	0.0180195	0.00498161	0.0327874	3.09197e-24	0.472123	0.0104096	0.0414867	0.865516	0.00015912	9.92817e-30	0.937978
300	Tot-cholesterol	phosphatidylcholine (18:0/20:5, 16:0/22:5n6)*	1123	TRUE	5.51782	0.136684	-0.222769	0.482992	0.0215575	-0.00471289	-0.00831927	1.7887e-76	0.439125	0.245874	1.22769e-15	0.865644	0.201533	0.184123	0.937978
375	Glucose	sphingomyelin (d18:1/20:0, d16:1/22:0)*	1177	TRUE	1.3194	-0.0233293	0.0220199	-0.0249463	0.00606953	0.00190365	0.00746447	2.49586e-246	0.550115	0.278126	0.124775	0.867531	1.31046e-05	1.41578e-24	0.937978
466	Triglycerides	1-myristoyl-2-palmitoyl-GPC (14:0/16:0)	1330	TRUE	-1.13668	0.0889744	0.219242	0.180732	0.0098763	0.0036603	0.0305334	1.57367e-30	0.192095	0.00334473	4.29315e-09	0.867584	0.00464174	4.01717e-28	0.937978
400	Triglycerides	1-palmitoyl-2-linoleoyl-GPC (16:0/18:2)	1330	TRUE	-1.59134	0.0702325	0.210718	0.525135	0.0263725	0.00509568	0.0321921	3.77661e-37	0.661322	0.00476227	2.41055e-11	0.867833	6.32645e-05	4.3096e-31	0.937978
219	Tot-cholesterol	pyruvate	1122	TRUE	5.95747	0.174948	-0.189271	-0.105843	-0.0117018	0.000948976	-0.00869114	1.69333e-87	0.200161	0.347778	0.006091	0.873383	0.803346	0.187897	0.942046
50	Glucose	arabitol/xylitol	1206	TRUE	1.28576	-0.0120633	0.0234611	0.0176929	-0.0038811	0.00182191	0.00716122	6.11776e-295	0.671063	0.245676	0.137427	0.875798	3.05276e-05	1.04948e-23	0.942046
189	LDL	1-stearoyl-2-docosahexaenoyl-GPC (18:0/22:6)	1123	TRUE	3.13355	0.24886	-0.205474	0.591038	-0.0247868	-0.0137763	0.010083	6.47256e-29	0.208144	0.25027	6.20961e-14	0.876512	6.64243e-05	0.0838247	0.942046
147	Tot-cholesterol	fructose	1123	TRUE	6.17711	0.199476	-0.220526	-0.190072	-0.0372249	-0.000726293	-0.0120716	4.06995e-82	0.445124	0.26771	0.141638	0.879407	0.848103	0.0630868	0.943394
297	Triglycerides	palmitoyl dihydrosphingomyelin (d18:0/16:0)*	1330	TRUE	-0.886713	0.0882623	0.184799	-0.190892	0.0172529	0.00575103	0.0313207	5.00384e-14	0.475069	0.0162062	0.00294717	0.881711	1.33469e-05	6.02655e-28	0.944104
414	Triglycerides	1-palmitoyl-2-palmitoleoyl-GPC (16:0/16:1)*	1330	TRUE	-1.09386	0.0964866	0.200854	0.309657	0.00803777	0.00273218	0.025251	1.14265e-31	0.13101	0.0046281	1.52201e-27	0.884977	0.0256916	3.77877e-21	0.944157
545	Triglycerides	tiglylcarnitine (C5:1-DC)	1325	TRUE	-1.06329	0.089129	0.212554	0.0140334	0.0125392	0.00486242	0.0320203	2.77101e-24	0.340401	0.00675483	0.751032	0.885045	0.000359175	1.76944e-28	0.944157
33	Triglycerides	1-palmitoyl-2-arachidonoyl-GPE (16:0/20:4)*	1330	TRUE	-1.21152	0.0908461	0.178232	0.400143	0.00720207	0.00216549	0.0278557	7.71963e-43	0.121004	0.00803553	5.67619e-52	0.8908	0.0620718	1.06586e-28	0.944283
58	HDL	tricosanoyl sphingomyelin (d18:1/23:0)*	825	TRUE	2.25875	-0.0987704	-0.116537	0.105861	-0.0126622	0.00885497	-0.0379757	6.50305e-45	0.34343	0.233148	0.0123265	0.891732	3.48284e-06	6.41047e-32	0.944283
104	Glucose	sphingomyelin (d18:2/23:0, d18:1/23:1, d17:1/24:1)*	1207	TRUE	1.35043	-0.0127017	0.0184364	-0.0451575	-0.00466819	0.00195342	0.00695554	2.34031e-272	0.719092	0.359694	0.0042675	0.887469	4.71634e-06	1.20542e-22	0.944283
423	Glucose	glucose	1207	TRUE	0.953545	-0.00479047	0.0199746	0.4604	-0.00526312	0.00133941	0.00349619	1.52928e-261	0.903836	0.162656	1.11451e-166	0.890589	1.14619e-05	1.20757e-11	0.944283
145	Glucose	arabonate/xylonate	1206	TRUE	1.27249	-0.0189668	0.0259409	0.0311904	0.00227372	0.00185318	0.00705594	1.81396e-294	0.385718	0.196368	0.000940957	0.90434	1.45959e-05	2.00509e-23	0.954213
393	LDL	isobutyrylcarnitine (C4)	1119	TRUE	3.64317	0.229804	-0.190446	-0.0136337	-0.0114868	-0.00851864	0.00521499	3.69701e-38	0.0882171	0.303325	0.798895	0.905746	0.016347	0.386959	0.954213
244	LDL	3-hydroxyisobutyrate	1105	TRUE	3.65424	0.231874	-0.20811	0.0286022	-0.0116744	-0.00964679	0.00547695	5.21588e-37	0.118365	0.277527	0.626515	0.907424	0.00708856	0.366135	0.954213
453	Triglycerides	mannitol/sorbitol	1330	TRUE	-1.0687	0.103586	0.203785	-0.00471567	-0.00139489	0.0052155	0.032353	4.53363e-26	0.00582972	0.00851387	0.370861	0.907747	8.72308e-05	6.19231e-29	0.954213
208	LDL	1-stearoyl-2-docosapentaenoyl-GPC (18:0/22:5n3)*	1123	TRUE	2.95435	0.247129	-0.249884	0.718789	-0.0169221	-0.0122114	0.00684191	2.8251e-25	0.27675	0.160455	1.1117e-15	0.926425	0.000341697	0.237457	0.969663
18	Tot-cholesterol	1-palmitoyl-2-oleoyl-GPC (16:0/18:1)	1123	TRUE	4.37731	0.133901	-0.264427	1.53948	0.0254121	0.000383044	-0.0158775	9.55186e-44	0.657351	0.153864	6.95539e-30	0.926703	0.913704	0.00846668	0.969663
224	Tot-cholesterol	1,2-dipalmitoyl-GPC (16:0/16:0)	1123	TRUE	3.78113	0.11852	-0.0414733	2.06275	0.0257966	-0.00366436	-0.00255934	3.3566e-33	0.700778	0.817391	7.39947e-44	0.92919	0.284318	0.662494	0.969663
539	Triglycerides	oleoyl-linoleoyl-glycerol (18:1/18:2) [2]	1329	TRUE	-1.24992	0.0798819	0.139167	0.560543	-0.00355451	0.00259984	0.0204297	8.29937e-72	0.0906878	0.00875779	1.91333e-177	0.928202	0.00421603	1.68226e-24	0.969663
408	Triglycerides	isobutyrylglycine	1324	TRUE	-1.13062	0.100413	0.203647	0.0754876	-0.00484268	0.00546981	0.0306762	6.60448e-28	0.157013	0.00777716	0.0183396	0.933738	2.94511e-05	3.71915e-26	0.972643
342	Glucose	1-palmitoyl-2-arachidonoyl-GPC (16:0/20:4n6)	1207	TRUE	1.29419	-0.01442	0.0233011	0.000941501	-0.00200831	0.00194475	0.00725383	8.46602e-264	0.64971	0.249524	0.94602	0.941223	6.18508e-06	2.08536e-24	0.978668
317	Triglycerides	sphingomyelin (d18:2/23:0, d18:1/23:1, d17:1/24:1)*	1330	TRUE	-0.991365	0.111744	0.198728	-0.0900115	-0.00907289	0.00556829	0.0317856	1.89607e-18	0.408969	0.0101158	0.151197	0.944168	3.80466e-05	1.84844e-28	0.979958
412	Triglycerides	1-stearoyl-2-linoleoyl-GPI (18:0/18:2)	1325	TRUE	-1.40963	0.0964218	0.22107	0.253436	0.0053245	0.00618281	0.0327279	1.56834e-33	0.368797	0.00402626	1.2829e-07	0.956777	2.49608e-06	7.48846e-31	0.980473
2	Glucose	1-pentadecanoyl-2-linoleoyl-GPC (15:0/18:2)*	1207	TRUE	1.31079	-0.0181593	0.0219096	-0.0128268	0.00119754	0.00196003	0.00713751	3.69169e-281	0.475007	0.279375	0.273901	0.959225	5.17024e-06	2.24245e-23	0.980473
102	Triglycerides	1-stearoyl-2-oleoyl-GPC (18:0/18:1)	1330	TRUE	-1.26896	0.110857	0.180106	0.417056	-0.00468579	0.0025095	0.0289422	2.70204e-38	0.230458	0.011931	1.6287e-20	0.957703	0.0438141	2.84047e-27	0.980473
561	HDL	palmitoyl dihydrosphingomyelin (d18:0/16:0)*	1123	TRUE	1.91436	-0.0798682	-0.0680386	0.407422	-0.00594952	0.00702887	-0.0334796	3.66503e-39	0.53761	0.415482	3.60618e-12	0.960011	9.55538e-06	1.90732e-34	0.980473
272	Glucose	1-myristoyl-2-palmitoyl-GPC (14:0/16:0)	1207	TRUE	1.28344	-0.0173019	0.0239421	0.00948605	0.000903275	0.00195423	0.0072698	1.75615e-286	0.381457	0.23633	0.251847	0.955796	5.52163e-06	1.60504e-24	0.980473
456	Glucose	sphinganine	533	TRUE	1.18572	-0.000114027	0.0448923	0.00523349	-0.00210826	0.00292439	0.00898344	3.07281e-93	0.99746	0.131038	0.740294	0.950503	1.72322e-05	1.09569e-13	0.980473
507	Triglycerides	choline phosphate	1305	TRUE	-1.07811	0.0948414	0.200778	0.0131102	-0.00521572	0.00486369	0.0325778	1.81058e-21	0.288651	0.0107887	0.744433	0.949701	0.000286026	1.86541e-28	0.980473
46	Tot-cholesterol	1-myristoyl-2-palmitoyl-GPC (14:0/16:0)	1123	TRUE	5.27288	0.185633	-0.167494	0.626924	-0.00874606	-0.000529194	-0.0127857	2.73288e-69	0.2726	0.378718	6.8802e-19	0.949113	0.883966	0.0387831	0.980473
568	Triglycerides	fructose	1330	TRUE	-1.26735	0.106926	0.177836	0.20575	-0.00508188	0.00518595	0.0312594	1.95862e-29	0.298493	0.0200859	1.76951e-05	0.95628	6.94658e-05	3.32808e-28	0.980473
195	LDL	citrate	1123	TRUE	3.79408	0.214885	-0.172423	-0.216388	0.0107097	-0.00749505	0.00533012	9.53379e-39	0.411646	0.349116	0.0603551	0.961895	0.0369508	0.373816	0.980562
437	Triglycerides	oleoyl-linoleoyl-glycerol (18:1/18:2) [1]	1329	TRUE	-1.25499	0.0743695	0.139849	0.559835	-0.00186138	0.00283992	0.0202081	1.14421e-68	0.133901	0.010407	1.52731e-162	0.964207	0.00236102	9.60713e-23	0.980562
108	Triglycerides	1-palmitoyl-2-oleoyl-GPE (16:0/18:1)	1302	TRUE	-0.974073	0.0966434	0.132584	0.324467	-0.00138307	0.00213946	0.0207715	4.77065e-32	0.0254558	0.0329547	7.52154e-80	0.966948	0.0488223	2.95157e-18	0.980562
115	HDL	isovalerylglycine	1104	TRUE	2.57742	-0.0807457	-0.124185	-0.17411	-0.00297257	0.00650226	-0.0347603	5.77272e-83	0.310234	0.141746	1.68113e-05	0.969454	6.12679e-05	7.81131e-36	0.980562
225	Tot-cholesterol	isovalerylcarnitine (C5)	1121	TRUE	5.96815	0.1467	-0.233327	0.107429	0.00565949	-0.000985036	-0.0151768	3.85237e-86	0.420293	0.241061	0.219414	0.969893	0.795885	0.021227	0.980562
27	HDL	alpha-hydroxyisovalerate	1123	TRUE	2.33606	-0.0758443	-0.135403	0.0893234	-0.00257454	0.00724456	-0.037398	2.06898e-68	0.35565	0.11198	0.00649875	0.970619	8.6533e-06	3.21306e-41	0.980562
494	HDL	1,5-anhydroglucitol (1,5-AG)	1121	TRUE	2.4157	-0.0803487	-0.128657	0.0240511	-0.00349312	0.00691885	-0.0367163	1.1079e-67	0.436382	0.133621	0.622275	0.972035	2.37534e-05	2.39483e-39	0.980562
364	Triglycerides	sphingomyelin (d18:1/21:0, d17:1/22:0, d16:1/23:0)*	1330	TRUE	-1.14109	0.103282	0.20461	0.0978183	-0.00349089	0.00469022	0.032049	8.42652e-25	0.388985	0.00822871	0.0681656	0.975154	0.000443466	8.2095e-29	0.981986
203	LDL	isovalerylcarnitine (C5)	1121	TRUE	3.59566	0.202271	-0.189509	0.13624	0.00349902	-0.00953788	0.00331813	1.44414e-37	0.229615	0.303421	0.0917102	0.979867	0.00679459	0.586197	0.983372
212	Tot-cholesterol	citrate	1123	TRUE	6.10533	0.161416	-0.221741	-0.142172	0.006092	0.000422076	-0.0135564	1.1982e-83	0.568384	0.265274	0.254692	0.979951	0.913435	0.0363554	0.983372
398	Tot-cholesterol	sphingosine 1-phosphate	1123	TRUE	6.09253	0.16341	-0.234036	-0.0801152	-0.00230581	-0.000704422	-0.0132701	1.73378e-67	0.649503	0.239591	0.670559	0.994866	0.85284	0.0407325	0.996599
535	Glucose	N-palmitoyl-sphingosine (d18:1/16:0)	1207	TRUE	1.30921	-0.0164776	0.0224707	-0.0143971	0.00011952	0.00198159	0.00722606	1.56936e-273	0.632562	0.266545	0.335658	0.99688	4.36967e-06	3.16877e-24	0.99688

## Sheet: M_E2
	col1	col2	n	converged	Intercept	C(APOE_Status, Treatment(reference=1))[T.E2]	Statin_User[T.Yes]	analyte2	analyte2:C(APOE_Status, Treatment(reference=1))[T.E2]	Age	BMI	Intercept_p	C(APOE_Status, Treatment(reference=1))[T.E2]_p	Statin_User[T.Yes]_p	analyte2_p	analyte2:C(APOE_Status, Treatment(reference=1))[T.E2]_p	Age_p	BMI_p	pval_adj
46	LDL	1-stearoyl-2-oleoyl-GPC (18:0/18:1)	30	TRUE	5.97032	-5.84385	-0.253062	-0.0130353	6.98386	-0.02248	-0.0595281	0.000722357	0.00111014	0.679076	0.964767	0.00121902	0.345498	0.0595199	0.348754
96	Tot-cholesterol	sphinganine-1-phosphate	26	TRUE	10.2116	-12.7014	-0.229997	0.201499	15.3362	-0.062751	-0.0555691	1.46845e-06	0.00807193	0.752584	0.742462	0.00802533	0.0414687	0.188641	0.348754
472	Tot-cholesterol	sphingosine	22	TRUE	9.87694	5.73932	-0.126284	0.0170872	-6.42111	-0.0661579	-0.0324967	8.95958e-05	0.0115645	0.869321	0.963922	0.00774145	0.0646265	0.510131	0.348754
186	LDL	1,5-anhydroglucitol (1,5-AG)	30	TRUE	7.22827	-3.1372	-0.0646189	-0.301355	3.9768	-0.0578506	-0.0133406	0.00012713	0.0109167	0.919089	0.586816	0.00708277	0.0267841	0.698209	0.348754
287	LDL	sphingosine	22	TRUE	6.24602	5.30797	-0.10024	-0.276947	-5.75905	-0.0354117	-0.0328522	0.00506359	0.00822878	0.882526	0.406795	0.00687773	0.263073	0.451203	0.348754
391	LDL	1-palmitoyl-2-oleoyl-GPC (16:0/18:1)	30	TRUE	5.88267	-5.77177	-0.264377	-0.0138125	6.65076	-0.0204433	-0.0609468	0.00309789	0.00563841	0.679948	0.975434	0.00615159	0.439966	0.0667209	0.348754
10	Triglycerides	ribitol	34	TRUE	-0.71602	-2.41795	-0.264118	-0.460466	2.49792	-0.00607923	0.0598997	0.371293	0.0120655	0.542395	0.200644	0.0059089	0.572475	0.0133766	0.348754
328	Tot-cholesterol	3-methylglutaconate	27	TRUE	11.0936	-13.134	-0.485132	-0.657266	10.3556	-0.0650766	-0.0496805	1.21385e-09	0.00889088	0.501734	0.0715347	0.00855087	0.0123449	0.187301	0.348754
547	Tot-cholesterol	1-palmitoyl-2-palmitoleoyl-GPC (16:0/16:1)*	30	TRUE	8.98546	-2.70079	-0.256567	0.28455	3.42517	-0.0382905	-0.0703367	3.81249e-06	0.00538098	0.713553	0.17961	0.00482381	0.172586	0.050029	0.348754
15	LDL	N-acetylisoleucine	30	TRUE	5.43829	2.28101	-0.201509	-0.639012	-2.61997	-0.00222067	-0.0659118	0.000167465	0.00888692	0.722886	0.07758	0.00412084	0.925328	0.0249285	0.348754
18	Tot-cholesterol	1-palmitoyl-2-oleoyl-GPC (16:0/18:1)	30	TRUE	8.25883	-6.56855	-0.312787	0.70225	7.58948	-0.0313765	-0.0742558	0.000115412	0.00344488	0.650423	0.146046	0.00369933	0.271112	0.0380604	0.348754
312	LDL	3-methylglutaconate	27	TRUE	6.51002	-12.5607	-0.454373	-0.683653	9.92769	-0.0294682	-0.0380182	3.62903e-05	0.00376884	0.466325	0.0299886	0.00351496	0.189574	0.242677	0.348754
61	Tot-cholesterol	1-stearoyl-2-oleoyl-GPC (18:0/18:1)	30	TRUE	8.92555	-6.41214	-0.316917	0.429411	7.62159	-0.0409854	-0.0664147	4.66464e-06	0.00118788	0.638774	0.187391	0.0013842	0.119175	0.0568195	0.348754
31	Tot-cholesterol	N-acetylisoleucine	30	TRUE	9.94577	2.57088	-0.250926	-0.412849	-3.07425	-0.0412664	-0.0743729	1.70026e-08	0.0156791	0.717487	0.350132	0.00581102	0.153542	0.0381348	0.348754
422	LDL	1-myristoyl-2-linoleoyl-GPC (14:0/18:2)*	30	TRUE	5.01188	-2.07245	-0.15116	0.636915	2.47201	-0.00788171	-0.0775402	0.00149717	0.0118781	0.800027	0.121317	0.00982656	0.732798	0.0158939	0.35845
94	Tot-cholesterol	3-hydroxy-2-ethylpropionate	30	TRUE	9.74166	4.26096	-0.0630655	0.58323	-3.77296	-0.0537432	-0.0766914	1.60992e-07	0.0174441	0.93402	0.182345	0.0100441	0.0540488	0.0482413	0.35845
523	LDL	1-palmitoyl-2-palmitoleoyl-GPC (16:0/16:1)*	30	TRUE	6.01659	-2.28782	-0.246056	-0.0317158	2.88041	-0.0256354	-0.0533128	0.000921744	0.0115847	0.706202	0.872757	0.0111484	0.328188	0.111721	0.374456
460	LDL	sphinganine-1-phosphate	26	TRUE	6.43474	-9.59422	-0.22112	-0.0566733	11.7286	-0.0299646	-0.0576451	0.000945202	0.0292338	0.741229	0.919787	0.0271688	0.288775	0.137297	0.456303
550	Glucose	glycerate	37	TRUE	4.04725	3.89593	-0.163831	0.933257	-4.14251	-0.00926367	0.0323791	0.0133378	0.0139743	0.767039	0.150719	0.0279724	0.695121	0.377384	0.456303
247	HDL	sphingomyelin (d18:2/14:0, d18:1/14:1)*	30	TRUE	2.86835	0.620571	0.32964	0.892859	-1.03488	-0.0133485	-0.0445128	0.000875032	0.169987	0.379692	0.0293481	0.0280215	0.301588	0.0265534	0.456303
427	Tot-cholesterol	3-methyl-2-oxovalerate	30	TRUE	9.88038	2.04039	0.0310274	1.09714	-1.54148	-0.0802748	-0.0554765	2.87275e-07	0.067882	0.967775	0.0364006	0.0295684	0.00402277	0.156524	0.456303
327	Tot-cholesterol	2-methylcitrate/homocitrate	23	TRUE	10.1312	-5.72358	-0.297104	0.313609	5.91433	-0.0671377	-0.0422778	9.02328e-05	0.0277605	0.722903	0.670227	0.031166	0.0726451	0.381907	0.456303
552	LDL	succinylcarnitine (C4-DC)	30	TRUE	6.48122	2.36538	-0.304678	-0.24255	-2.25674	-0.0397645	-0.0286101	6.83887e-05	0.0522805	0.660188	0.54731	0.0299912	0.0879541	0.386436	0.456303
434	Triglycerides	oleoyl-linoleoyl-glycerol (18:1/18:2) [1]	34	TRUE	-1.21519	0.751637	0.0592056	0.693051	-0.533179	-0.019512	0.0610334	0.0800771	0.0317698	0.866642	0.000464224	0.0306025	0.0190556	0.00128575	0.456303
356	Tot-cholesterol	glycerophosphoethanolamine	30	TRUE	9.26404	2.22392	-0.181083	0.649148	-2.87972	-0.0520742	-0.0617056	5.7705e-06	0.0547131	0.812084	0.155166	0.0267202	0.0636167	0.124007	0.456303
339	Tot-cholesterol	glycerate	30	TRUE	10.9217	-4.18069	0.0307474	0.391036	4.81691	-0.0910951	-0.0197773	1.00037e-08	0.0195711	0.968659	0.63883	0.029679	0.00118578	0.615461	0.456303
437	Tot-cholesterol	1-myristoyl-2-linoleoyl-GPC (14:0/18:2)*	30	TRUE	8.38668	-1.92762	-0.0602298	1.3187	2.20345	-0.0267633	-0.103866	2.43735e-07	0.0229958	0.92188	0.00182944	0.0253491	0.26001	0.00169915	0.456303
13	LDL	mannitol/sorbitol	30	TRUE	6.66326	0.496049	-0.116373	0.0165124	-0.144515	-0.0435908	-0.0385263	0.000257558	0.233326	0.862069	0.661727	0.0309832	0.0992931	0.255042	0.456303
267	Tot-cholesterol	N-acetylleucine	30	TRUE	10.9661	3.12778	-0.232354	0.19344	-3.84659	-0.0765195	-0.0511573	4.70545e-08	0.0439902	0.76245	0.752166	0.0244225	0.0160145	0.191327	0.456303
334	LDL	glycerophosphoethanolamine	30	TRUE	5.70033	2.1299	-0.227434	0.189468	-2.7121	-0.0210013	-0.0603091	0.00130314	0.0339884	0.730789	0.632576	0.0161953	0.388683	0.0832076	0.456303
6	Tot-cholesterol	succinylcarnitine (C4-DC)	30	TRUE	10.729	2.89901	-0.225099	-0.0829988	-2.82226	-0.0741197	-0.0378949	8.32114e-09	0.0375943	0.776461	0.857146	0.0176724	0.00543364	0.315968	0.456303
124	LDL	2-methylcitrate/homocitrate	23	TRUE	5.72066	-5.50836	-0.240777	0.021674	5.75138	-0.0312897	-0.030018	0.0143764	0.0190384	0.750379	0.974007	0.0203379	0.354339	0.491871	0.456303
230	Glucose	succinylcarnitine (C4-DC)	37	TRUE	3.87935	-2.43907	-0.288941	-0.0988308	2.65736	-0.00375932	0.0545087	0.0172239	0.0691624	0.597257	0.79558	0.0216328	0.87197	0.122651	0.456303
244	LDL	N-acetylleucine	30	TRUE	6.11938	2.85356	-0.10828	-0.270328	-3.42809	-0.0313686	-0.0360423	0.000257191	0.0275567	0.865867	0.596676	0.0161735	0.236408	0.269625	0.456303
291	HDL	alpha-ketoglutarate	30	TRUE	3.00219	1.20349	0.0780135	0.167565	-0.701312	-0.0217238	-0.0133176	0.000585498	0.0830148	0.819424	0.121554	0.0221879	0.117911	0.492671	0.456303
516	LDL	isobutyrylglycine	30	TRUE	6.07524	1.68613	-0.181808	-0.22761	-2.08633	-0.0348882	-0.0279552	0.000246898	0.0533024	0.775383	0.522031	0.0235684	0.157912	0.401595	0.456303
431	Glucose	isovalerylcarnitine (C5)	37	TRUE	3.68261	-1.0522	-0.255116	-0.37845	1.31634	-5.95217e-05	0.0659115	0.0289742	0.175991	0.646713	0.199575	0.0243274	0.998086	0.0720467	0.456303
203	Tot-cholesterol	1,5-anhydroglucitol (1,5-AG)	30	TRUE	11.0926	-3.11655	-0.107887	-0.0214241	3.93973	-0.0866255	-0.0253978	4.40881e-07	0.0298837	0.884193	0.97353	0.021952	0.00439872	0.526102	0.456303
126	Glucose	sphingosine	28	TRUE	5.57281	-3.78281	-0.073496	0.141935	4.9295	-0.0209299	0.0222401	0.00292673	0.0642445	0.889286	0.641965	0.024967	0.455301	0.597671	0.456303
201	LDL	isovalerylcarnitine (C5)	30	TRUE	6.44341	1.20551	-0.107659	0.106335	-1.18727	-0.0463451	-0.0276963	0.00013708	0.0958436	0.872415	0.707056	0.0337199	0.0610073	0.434844	0.481351
321	Glucose	2-hydroxy-3-methylvalerate	37	TRUE	3.97407	-0.658475	-0.333085	-0.164334	0.777287	-0.00595059	0.0605468	0.0174364	0.319613	0.549826	0.385175	0.0358433	0.806558	0.0965537	0.481797
145	Tot-cholesterol	fructose	30	TRUE	11.3069	2.5335	-0.19836	-0.448688	-2.47179	-0.0746496	-0.0444287	2.34175e-08	0.0583531	0.779331	0.511988	0.0362341	0.00519911	0.225261	0.481797
278	Triglycerides	1,2-dilinoleoyl-GPC (18:2/18:2)	34	TRUE	-1.11859	1.63758	0.0325076	0.290626	-1.71231	-0.0125776	0.0615264	0.182744	0.0181807	0.940229	0.208513	0.0362824	0.213669	0.00715273	0.481797
138	LDL	glycerate	30	TRUE	6.63403	-3.47333	-0.0635714	0.0680954	4.12376	-0.0533233	-0.0155925	0.000107567	0.0309376	0.927985	0.927545	0.0383532	0.0347208	0.659502	0.486685
120	LDL	fructose	30	TRUE	6.78561	2.29798	-0.17459	-0.333527	-2.16466	-0.040164	-0.0367982	0.000154069	0.0525225	0.780653	0.582046	0.0383627	0.0895664	0.256747	0.486685
415	LDL	1-myristoyl-2-palmitoyl-GPC (14:0/16:0)	30	TRUE	5.30641	-1.49206	-0.180945	0.333253	1.77009	-0.0177758	-0.0573972	0.00212909	0.0498703	0.779062	0.346827	0.0392075	0.470314	0.0841557	0.486685
538	Tot-cholesterol	isobutyrylglycine	30	TRUE	10.3629	1.64433	-0.211281	-0.268894	-2.17096	-0.0670276	-0.0353966	8.84574e-08	0.106908	0.776653	0.517598	0.0438509	0.0202878	0.363566	0.52563
504	LDL	1-palmitoyl-2-linoleoyl-GPC (16:0/18:2)	30	TRUE	3.51598	-3.04956	0.144039	1.71717	3.49387	-0.00701166	-0.0644956	0.0341524	0.0491258	0.803072	0.00492097	0.0441861	0.742568	0.0265574	0.52563
29	Tot-cholesterol	mannitol/sorbitol	30	TRUE	11.0796	0.407483	-0.130706	0.0202945	-0.151919	-0.0777348	-0.0477806	1.92332e-07	0.401561	0.867218	0.644988	0.0520091	0.0117879	0.226494	0.549948
45	Tot-cholesterol	1-myristoyl-2-palmitoyl-GPC (14:0/16:0)	30	TRUE	8.61009	-1.49482	-0.128224	0.864953	1.72002	-0.0371265	-0.0768353	1.31171e-06	0.0565001	0.846975	0.0177778	0.0517762	0.143265	0.0248169	0.549948
411	Triglycerides	1-palmitoyl-2-palmitoleoyl-GPC (16:0/16:1)*	34	TRUE	-0.679999	-0.904072	-0.125554	0.107565	1.38439	-0.00926421	0.0440927	0.406319	0.14156	0.771226	0.354723	0.0517454	0.396421	0.0693353	0.549948
265	Glucose	3-methyl-2-oxovalerate	37	TRUE	3.85634	-1.221	-0.0933231	-0.43956	1.15668	-0.000611186	0.0671421	0.0224078	0.201626	0.874502	0.238247	0.0491283	0.979945	0.067992	0.549948
228	HDL	sphinganine-1-phosphate	26	TRUE	2.24316	-3.92842	0.0307557	0.280991	4.39478	-0.00984205	-0.0137574	0.00597607	0.0332282	0.912765	0.233704	0.048347	0.405946	0.397646	0.549948
74	LDL	3-hydroxy-2-ethylpropionate	30	TRUE	5.73714	3.03686	-0.214423	0.114134	-2.64558	-0.0211436	-0.0593899	0.000848588	0.0669583	0.76086	0.777809	0.0509654	0.41251	0.0981442	0.549948
223	Tot-cholesterol	isovalerylcarnitine (C5)	30	TRUE	10.7609	1.16699	-0.128403	0.137873	-1.25005	-0.0794021	-0.0369495	4.35875e-08	0.165716	0.869194	0.675249	0.0545757	0.00578522	0.370378	0.560963
402	Tot-cholesterol	arabitol/xylitol	30	TRUE	10.5591	-4.56992	-0.210407	-0.184819	3.18847	-0.0704784	-0.0359522	6.71803e-08	0.0438884	0.788024	0.733241	0.055403	0.0120698	0.388263	0.560963
220	LDL	1,2-dilinoleoyl-GPC (18:2/18:2)	30	TRUE	5.84696	-1.51861	-0.184525	0.61924	1.48665	-0.0364988	-0.0428599	0.000104393	0.0445826	0.756143	0.0582978	0.0562721	0.0873792	0.153184	0.560963
446	Glucose	isoleucine	37	TRUE	4.35051	-2.1735	-0.26233	-0.68407	2.40856	-0.00187867	0.0554	0.0144728	0.12979	0.636236	0.469263	0.0569805	0.936971	0.119799	0.560963
108	Tot-cholesterol	mannose	30	TRUE	12.1556	4.38818	-0.345513	-0.711069	-2.80908	-0.0963355	-0.0119297	6.31701e-08	0.0530674	0.660562	0.352203	0.0596172	0.00103452	0.765821	0.57029
235	Glucose	isobutyrylcarnitine (C4)	37	TRUE	3.68635	-1.73398	-0.30339	0.0426566	1.92607	0.00162549	0.043476	0.0283839	0.159677	0.598036	0.87788	0.0599253	0.949189	0.229578	0.57029
524	LDL	phosphatidylcholine (16:0/22:5n3, 18:1/20:4)*	30	TRUE	6.33258	-2.80687	-0.239685	-0.36507	2.60352	-0.0234928	-0.0571744	0.00103966	0.0550081	0.727647	0.571376	0.0611029	0.366823	0.112883	0.571963
47	HDL	2-hydroxy-3-methylvalerate	30	TRUE	2.49177	0.18518	0.0116143	0.260542	-0.306746	-0.00490068	-0.0370671	0.00248141	0.531402	0.971511	0.00384078	0.0642232	0.680786	0.0278365	0.572991
175	Glucose	leucine	37	TRUE	4.30221	-2.8667	-0.269096	-0.761727	3.1529	-0.00158717	0.0592899	0.0233551	0.124133	0.633215	0.453081	0.0639301	0.947621	0.0950564	0.572991
88	Glucose	valine	37	TRUE	4.06813	-4.3742	-0.322822	-0.617558	4.67013	-0.000457394	0.059608	0.0317601	0.100422	0.566592	0.591633	0.0626251	0.984971	0.102197	0.572991
179	Tot-cholesterol	alpha-hydroxyisocaproate	30	TRUE	10.246	1.45191	-0.275822	0.611632	-1.33146	-0.0770224	-0.047231	1.93333e-07	0.143526	0.725276	0.130551	0.0671957	0.00694969	0.236463	0.580034
561	LDL	1-palmitoyl-2-arachidonoyl-GPI (16:0/20:4)*	29	TRUE	6.07502	-1.57902	-0.205773	-0.21446	1.26602	-0.0270384	-0.0467757	0.00184586	0.0711016	0.759921	0.517885	0.0682819	0.334935	0.190201	0.580034
453	HDL	glycerate	30	TRUE	3.04573	-1.80841	0.100833	0.214337	1.87078	-0.0186609	-0.0175878	0.000575615	0.0295966	0.781336	0.579435	0.0688717	0.152468	0.335895	0.580034
507	HDL	pyruvate	30	TRUE	3.11426	0.735834	0.0414072	0.00809695	-0.404057	-0.0191301	-0.0142457	0.000476181	0.205084	0.907557	0.889268	0.0690758	0.167168	0.47281	0.580034
396	Glucose	isovalerylglycine	33	TRUE	3.37258	-0.974088	-0.342181	-0.227482	1.83586	-0.000905839	0.0700205	0.0846931	0.274494	0.548736	0.668124	0.0834792	0.974423	0.0874351	0.597318
380	Glucose	isobutyrylglycine	37	TRUE	3.75018	-1.10422	-0.266173	0.154512	1.83445	-0.00561968	0.054312	0.024842	0.270764	0.636511	0.680957	0.0868256	0.82101	0.126036	0.597318
131	HDL	sphingomyelin (d18:1/24:1, d18:2/24:0)*	30	TRUE	2.05818	0.858586	0.0981576	0.53006	-1.14523	-0.00742681	-0.0207875	0.0855378	0.209539	0.787803	0.21853	0.0864565	0.612111	0.274069	0.597318
156	LDL	alpha-hydroxyisocaproate	30	TRUE	6.12346	1.25699	-0.203622	0.320932	-1.10829	-0.0424784	-0.0356889	0.000458877	0.153813	0.770162	0.371624	0.0861942	0.0936421	0.313723	0.597318
398	Glucose	alpha-hydroxyisocaproate	37	TRUE	3.77969	-0.919431	-0.320273	-0.251905	1.12335	-0.00155492	0.0613239	0.029346	0.315883	0.573277	0.443673	0.0853563	0.949909	0.0923404	0.597318
346	Tot-cholesterol	leucine	30	TRUE	9.6632	3.51686	-0.185413	1.41121	-3.51326	-0.0813514	-0.0416007	1.02038e-05	0.113091	0.814861	0.312406	0.0847905	0.00700914	0.300132	0.597318
204	LDL	arabitol/xylitol	30	TRUE	6.42003	-3.50951	-0.231875	-0.597117	2.5531	-0.0361814	-0.0202667	0.000193626	0.0788702	0.736518	0.211175	0.081536	0.143403	0.580767	0.597318
474	Glucose	choline	37	TRUE	5.28742	-6.87496	-0.339409	-1.45854	7.64721	-0.00231708	0.0451232	0.016835	0.0992652	0.546774	0.288904	0.0730929	0.927903	0.235673	0.597318
542	Glucose	4-methyl-2-oxopentanoate	37	TRUE	3.80639	-1.22179	-0.0478179	-0.458447	1.10911	0.0010986	0.0678523	0.02644	0.249928	0.936017	0.15332	0.0785567	0.964821	0.0621421	0.597318
325	LDL	leucine	30	TRUE	5.61548	3.20892	-0.160341	0.995846	-3.11905	-0.0456337	-0.0333802	0.00315894	0.0960824	0.81569	0.411896	0.0781802	0.081671	0.338557	0.597318
525	Tot-cholesterol	1-palmitoyl-2-linoleoyl-GPC (16:0/18:2)	30	TRUE	6.3098	-2.61507	0.34808	2.75617	2.95544	-0.0286866	-0.0782434	8.08332e-05	0.0802021	0.532041	2.86194e-06	0.0775466	0.163485	0.00526825	0.597318
255	LDL	galactonate	22	TRUE	6.80925	2.13818	-0.239402	-0.0555639	-0.798286	-0.051387	-0.0184186	7.93778e-05	0.0485076	0.721629	0.697071	0.0771662	0.0575132	0.674499	0.597318
376	Triglycerides	ribonate	34	TRUE	-1.24196	1.19944	0.0821019	0.445261	-0.854665	-0.00944719	0.0533524	0.128878	0.0416056	0.844666	0.0601549	0.0766767	0.395564	0.0179226	0.597318
42	Glucose	pyruvate	37	TRUE	4.5037	-0.819029	-0.26359	0.0605099	0.598605	-0.00501815	0.025843	0.00759572	0.329926	0.637747	0.565223	0.075721	0.833758	0.51134	0.597318
363	Glucose	beta-hydroxyisovalerate	37	TRUE	3.49098	-1.50095	-0.288509	0.26556	1.50536	0.00257282	0.0380324	0.0317341	0.204322	0.600803	0.499335	0.0804783	0.914286	0.300517	0.597318
137	HDL	oleoyl-linoleoyl-glycerol (18:1/18:2) [1]	30	TRUE	3.79377	-0.692083	-0.112225	-0.380812	0.37849	-0.0143102	-0.0339245	3.53869e-05	0.0465865	0.742503	0.0143833	0.0916214	0.249769	0.0507918	0.602851
293	LDL	1-stearoyl-2-linoleoyl-GPC (18:0/18:2)*	30	TRUE	3.81623	-4.52843	0.0605857	1.67587	4.79105	-0.00937033	-0.0674256	0.0269432	0.0844213	0.922193	0.0115958	0.0918529	0.686161	0.039764	0.602851
177	LDL	glycerophosphorylcholine (GPC)	30	TRUE	4.59049	-1.97474	-0.645842	0.990959	1.94347	-0.0196732	-0.0518084	0.00500311	0.0814626	0.303598	0.0551698	0.0887618	0.367431	0.0971103	0.602851
567	Glucose	sphingomyelin (d18:2/24:1, d18:1/24:2)*	37	TRUE	2.15887	2.48348	-0.148639	1.22649	-2.00947	-0.00416543	0.0710236	0.268753	0.036569	0.791494	0.0726392	0.0913281	0.867539	0.0510948	0.602851
412	LDL	3-methyl-2-oxovalerate	30	TRUE	5.88237	1.47613	-0.0411001	0.602778	-1.08315	-0.0436514	-0.0408956	0.000855532	0.14944	0.953429	0.209628	0.0952117	0.0878329	0.254346	0.606148
442	Tot-cholesterol	galactonate	22	TRUE	11.1124	2.22313	-0.332413	-0.124922	-0.784838	-0.0846536	-0.0214909	6.71062e-10	0.0492852	0.635383	0.401548	0.0958215	0.00270783	0.638575	0.606148
90	LDL	mannose	30	TRUE	6.67184	3.49637	-0.140996	-0.100174	-2.30291	-0.050157	-0.0181137	0.00138594	0.0969536	0.84697	0.887757	0.096315	0.0658222	0.626238	0.606148
558	Tot-cholesterol	isovalerylglycine	27	TRUE	8.97479	1.18542	-0.101392	-0.0959449	-1.78839	-0.0603247	-0.0108048	7.60975e-05	0.189027	0.891463	0.86814	0.097463	0.0608612	0.804709	0.606148
497	Tot-cholesterol	succinate	30	TRUE	10.2188	9.46989	-0.119762	0.427485	-13.398	-0.0717	-0.0398933	4.21617e-06	0.109251	0.884546	0.743562	0.0993846	0.0125711	0.326971	0.606148
237	Tot-cholesterol	isoleucine	30	TRUE	9.88326	2.85472	-0.163111	1.51496	-2.79199	-0.0858527	-0.0435297	2.26812e-06	0.133881	0.836904	0.277535	0.0994477	0.00578205	0.280779	0.606148
469	Triglycerides	1-myristoyl-2-linoleoyl-GPC (14:0/18:2)*	34	TRUE	0.59198	-0.630195	-0.000639006	0.38306	1.24511	-0.0185881	0.00892222	0.517422	0.288412	0.998759	0.0527172	0.100766	0.0550398	0.768615	0.606148
162	LDL	1-pentadecanoyl-2-linoleoyl-GPC (15:0/18:2)*	30	TRUE	4.81983	-1.61923	0.289047	1.62643	1.39265	-0.0293777	-0.055062	6.04874e-05	0.0535789	0.551704	2.72214e-05	0.100848	0.0845294	0.0216862	0.606148
535	Triglycerides	oleoyl-linoleoyl-glycerol (18:1/18:2) [2]	34	TRUE	-1.16407	0.572507	0.021955	0.539785	-0.360767	-0.0174111	0.0607436	0.0957714	0.0767701	0.950933	0.00122463	0.102948	0.0402448	0.00156825	0.612325
441	Tot-cholesterol	malate	29	TRUE	10.4902	-3.50175	-0.108636	0.304362	2.85597	-0.0740997	-0.0428954	4.47974e-07	0.0788586	0.89308	0.464924	0.105991	0.0164507	0.28961	0.617559
171	Tot-cholesterol	phosphatidylcholine (16:0/22:5n3, 18:1/20:4)*	30	TRUE	9.36842	-2.80707	-0.329248	0.505201	2.50272	-0.0471116	-0.0725129	1.29821e-05	0.0845998	0.667239	0.481456	0.10568	0.103858	0.0707555	0.617559
245	HDL	oleoyl-linoleoyl-glycerol (18:1/18:2) [2]	30	TRUE	3.8149	-0.602863	-0.109507	-0.357946	0.313684	-0.0150513	-0.0338557	3.26549e-05	0.0486287	0.748292	0.0146586	0.109968	0.227898	0.0523656	0.63426
543	Glucose	1-palmitoyl-2-stearoyl-GPC (16:0/18:0)	37	TRUE	3.60129	2.4587	-0.181575	0.448235	-1.99454	-0.0159737	0.0727119	0.0598964	0.0502253	0.751537	0.445693	0.112534	0.529043	0.0485457	0.637629
199	Tot-cholesterol	1-palmitoyl-2-arachidonoyl-GPI (16:0/20:4)*	29	TRUE	9.31109	-1.75141	-0.280943	0.160584	1.28204	-0.0437027	-0.0667831	4.13999e-05	0.0855225	0.720069	0.6775	0.112785	0.180683	0.108166	0.637629
111	Triglycerides	N-acetylleucine	34	TRUE	-0.096098	-1.21932	-0.115034	-0.468411	1.38186	-0.020432	0.0685903	0.918796	0.186942	0.797798	0.13072	0.116323	0.0713244	0.0040958	0.651183
227	Tot-cholesterol	1-stearoyl-2-arachidonoyl-GPI (18:0/20:4)	30	TRUE	10.8698	3.99427	-0.158041	-0.339265	-3.22727	-0.0756745	-0.0306895	5.40638e-08	0.132323	0.840709	0.538422	0.117499	0.0080119	0.455927	0.65138
217	Tot-cholesterol	pyruvate	30	TRUE	10.9418	1.59299	-0.103014	-0.0460337	-0.732026	-0.0864468	-0.0173854	4.55525e-08	0.221718	0.89761	0.724394	0.142365	0.00542768	0.696343	0.657183
168	HDL	1-palmitoyl-2-docosahexaenoyl-GPC (16:0/22:6)	30	TRUE	2.41468	0.352331	0.0785386	0.282091	-0.546178	-0.0121869	-0.0155316	0.0236039	0.44817	0.83192	0.267406	0.143027	0.375856	0.44877	0.657183
225	Tot-cholesterol	1-stearoyl-2-docosapentaenoyl-GPC (18:0/22:5n3)*	30	TRUE	8.67684	-1.85523	-0.39431	0.496544	1.66308	-0.0402344	-0.064599	0.000111634	0.127006	0.607608	0.244936	0.143597	0.18192	0.108651	0.657183
333	LDL	1-palmitoyl-2-docosahexaenoyl-GPE (16:0/22:6)*	30	TRUE	6.28537	1.76748	-0.107026	0.0602659	-1.51742	-0.0433388	-0.0264545	0.0031385	0.189279	0.880697	0.834988	0.144191	0.125241	0.47779	0.657183
250	LDL	valine	30	TRUE	5.75018	4.05348	-0.0670439	0.962012	-3.99156	-0.0457884	-0.0366367	0.00359514	0.163908	0.926041	0.567764	0.145048	0.103752	0.309876	0.657183
200	Triglycerides	1-margaroyl-2-oleoyl-GPC (17:0/18:1)*	34	TRUE	-0.778821	-1.1135	-0.150873	0.596896	1.3131	-0.0128614	0.0394225	0.390886	0.212324	0.712955	0.134016	0.147825	0.187309	0.0914519	0.657183
385	Glucose	1-palmitoyl-2-palmitoleoyl-GPC (16:0/16:1)*	37	TRUE	4.75801	1.87872	-0.163242	-0.0968391	-1.78368	-0.024183	0.0690595	0.00875282	0.0693498	0.77706	0.589533	0.152151	0.370874	0.0633623	0.657183
35	LDL	isoleucine	30	TRUE	5.83119	2.26959	-0.145656	0.939251	-2.14714	-0.0477751	-0.0341995	0.00152137	0.17557	0.834497	0.444158	0.149841	0.0808773	0.335474	0.657183
116	Tot-cholesterol	tiglylcarnitine (C5:1-DC)	30	TRUE	10.4524	1.41957	-0.190653	0.0794134	-1.44519	-0.068655	-0.0472586	8.66614e-07	0.238182	0.81275	0.839092	0.142181	0.0181363	0.244376	0.657183
38	Tot-cholesterol	1-palmitoyl-2-docosahexaenoyl-GPC (16:0/22:6)	30	TRUE	7.46191	0.898864	0.0871955	1.33364	-1.07344	-0.0569644	-0.0165736	0.00053578	0.338182	0.907152	0.00945183	0.154225	0.0404793	0.6891	0.657183
443	LDL	methylsuccinate	30	TRUE	5.89307	0.839098	-0.157548	0.21426	-0.708184	-0.0206328	-0.0711257	0.00095545	0.269631	0.828369	0.449608	0.152459	0.473847	0.0897109	0.657183
377	HDL	1-stearoyl-2-docosahexaenoyl-GPE (18:0/22:6)*	30	TRUE	3.79146	0.334845	0.02294	-0.145128	-0.391875	-0.0270038	-0.0143943	0.000150524	0.414016	0.946921	0.283086	0.152598	0.0610869	0.456441	0.657183
270	Glucose	1-myristoyl-2-palmitoyl-GPC (14:0/16:0)	37	TRUE	4.65081	1.59632	-0.168404	-0.278	-1.35263	-0.0223987	0.0746102	0.00607496	0.0636619	0.764104	0.326867	0.153657	0.365462	0.0407648	0.657183
488	HDL	1-margaroyl-2-linoleoyl-GPC (17:0/18:2)*	30	TRUE	2.77705	1.1991	0.111209	0.312323	-1.4865	-0.0179129	-0.0144038	0.00410435	0.250637	0.767989	0.36257	0.148017	0.216786	0.490497	0.657183
408	Glucose	sphingomyelin (d18:1/24:1, d18:2/24:0)*	37	TRUE	1.53272	2.54668	-0.037224	1.59656	-1.99538	0.000648754	0.0682883	0.457538	0.0688439	0.947708	0.0446617	0.14215	0.979754	0.0618715	0.657183
218	HDL	choline phosphate	29	TRUE	2.50162	0.538194	-0.0660783	0.229508	-0.729618	-0.0112102	-0.0192978	0.0181782	0.342327	0.857014	0.250928	0.131211	0.412895	0.324367	0.657183
348	HDL	1,2-dipalmitoyl-GPC (16:0/16:0)	30	TRUE	1.25301	0.819852	0.221939	1.11187	-1.14505	-5.83489e-05	-0.0278465	0.19747	0.280659	0.500799	0.00218728	0.140192	0.996242	0.0948298	0.657183
491	LDL	1-stearoyl-2-dihomo-linolenoyl-GPC (18:0/20:3n3 or 6)*	30	TRUE	5.79167	-1.48098	-0.209266	0.236364	1.71862	-0.0270053	-0.0522347	0.0012075	0.135336	0.759749	0.50647	0.120637	0.284621	0.139162	0.657183
63	HDL	succinate	30	TRUE	2.40106	3.78106	0.105742	0.681613	-5.58863	-0.0112033	-0.023886	0.0157399	0.153121	0.774551	0.243888	0.124637	0.383649	0.189792	0.657183
271	Tot-cholesterol	valine	30	TRUE	9.76252	4.79916	-0.0325278	1.56213	-4.79645	-0.0832369	-0.0468907	1.4698e-05	0.148544	0.96851	0.416078	0.124796	0.00952909	0.25459	0.657183
482	LDL	tiglylcarnitine (C5:1-DC)	30	TRUE	6.62189	1.31958	-0.200285	-0.190406	-1.26138	-0.0381867	-0.0398444	0.000244241	0.196895	0.769619	0.566652	0.131634	0.121925	0.248038	0.657183
206	LDL	1-stearoyl-2-docosapentaenoyl-GPC (18:0/22:5n3)*	30	TRUE	5.80066	-1.68251	-0.253721	0.0125244	1.54069	-0.0220529	-0.0553225	0.00499607	0.132556	0.719525	0.974573	0.14088	0.426514	0.135389	0.657183
302	Glucose	alpha-hydroxyisovalerate	37	TRUE	3.11442	-1.67374	-0.369984	0.0273416	1.97623	0.00902614	0.0475007	0.0821219	0.27147	0.522498	0.906188	0.132178	0.739577	0.212415	0.657183
483	Tot-cholesterol	2-hydroxy-3-methylvalerate	30	TRUE	10.3463	0.684329	-0.167626	0.180105	-0.617661	-0.0693631	-0.047918	3.79432e-07	0.349755	0.834928	0.419127	0.13193	0.0185702	0.250317	0.657183
241	HDL	mannose	30	TRUE	3.88718	1.4739	-0.130679	-0.472867	-1.01337	-0.0231967	-0.0118927	0.000130144	0.15071	0.713355	0.171195	0.132859	0.0805739	0.511357	0.657183
382	Glucose	alpha-ketoglutarate	37	TRUE	4.38854	-0.967317	-0.255512	-0.00786546	0.722312	-0.0046664	0.0345955	0.0115289	0.351748	0.65566	0.970104	0.133353	0.849888	0.392493	0.657183
202	Triglycerides	leucine	34	TRUE	0.400996	-1.79056	-0.0136243	-1.07683	1.91355	-0.0167807	0.0670369	0.690486	0.18677	0.97526	0.12611	0.13362	0.0998377	0.00518585	0.657183
476	HDL	phosphate	30	TRUE	0.825576	-19.5569	0.0103072	2.35455	19.4134	-0.0191992	-0.0142753	0.56608	0.128885	0.975335	0.0413527	0.134807	0.163458	0.461517	0.657183
226	HDL	1-oleoyl-2-docosahexaenoyl-GPC (18:1/22:6)*	30	TRUE	2.59289	0.714502	0.0960608	0.295666	-0.882663	-0.0164609	-0.0115727	0.0129287	0.299791	0.797268	0.345934	0.137029	0.240443	0.602008	0.657183
330	Tot-cholesterol	4-methyl-2-oxopentanoate	30	TRUE	10.1476	1.49473	-0.0865579	0.790696	-1.10654	-0.0803264	-0.052219	2.53455e-07	0.220515	0.912405	0.0684637	0.138877	0.00578033	0.194501	0.657183
37	HDL	sphingosine	22	TRUE	2.59649	1.2353	0.0736855	0.127116	-1.65537	-0.0188617	-0.0013063	0.0239655	0.233419	0.833304	0.46067	0.132263	0.248083	0.953712	0.657183
493	LDL	1-stearoyl-2-docosapentaenoyl-GPC (18:0/22:5n6)*	30	TRUE	6.27184	-1.36334	-0.249764	-0.141272	1.24177	-0.0266619	-0.0551742	0.00080732	0.136964	0.724273	0.572995	0.156797	0.336945	0.150044	0.660502
216	Triglycerides	1-stearoyl-2-arachidonoyl-GPE (18:0/20:4)	34	TRUE	-1.12726	0.54529	-0.367472	0.663097	-0.361269	-0.0182748	0.058275	0.0680008	0.0989684	0.254432	2.58216e-05	0.157317	0.0128668	0.000606857	0.660502
207	Glucose	3-methyl-2-oxobutyrate	37	TRUE	4.07547	-0.843974	0.13964	-0.516966	0.806712	-0.00865907	0.0854443	0.0145003	0.425576	0.816349	0.0589759	0.158703	0.718586	0.0241347	0.661457
170	HDL	3-methyl-2-oxovalerate	30	TRUE	2.64283	0.417172	0.0743675	0.421308	-0.467464	-0.0130392	-0.0328978	0.00358515	0.428311	0.837212	0.0882059	0.161486	0.321503	0.0746172	0.668179
254	LDL	malate	29	TRUE	6.22283	-2.64251	-0.181365	-0.0395402	2.24789	-0.0374699	-0.0335851	0.00103801	0.146287	0.805823	0.91717	0.163379	0.183913	0.363719	0.671147
79	Glucose	palmitoyl dihydrosphingomyelin (d18:0/16:0)*	37	TRUE	2.81851	1.95217	-0.0692815	0.942497	-1.50058	-0.0106396	0.0725603	0.122404	0.0689039	0.904505	0.101946	0.164949	0.671075	0.0541122	0.672757
68	Triglycerides	isovalerylcarnitine (C5)	34	TRUE	-0.426044	-0.263321	-0.111185	-0.011991	0.369773	-0.0154305	0.0527264	0.628409	0.526354	0.810609	0.947375	0.177983	0.167995	0.0431505	0.674541
32	Triglycerides	alpha-hydroxyisocaproate	34	TRUE	-0.153606	-0.713768	0.0652106	-0.353777	0.738115	-0.0170263	0.062196	0.88867	0.328137	0.892134	0.260806	0.177679	0.16665	0.0092066	0.674541
416	Tot-cholesterol	1,2-dilinoleoyl-GPC (18:2/18:2)	30	TRUE	9.81357	-1.32919	-0.217579	1.04471	1.12963	-0.0690537	-0.0523226	1.39414e-09	0.10208	0.733464	0.00297224	0.177382	0.00263435	0.104898	0.674541
285	HDL	ribitol	29	TRUE	3.38185	1.15232	0.133823	0.376017	-1.40494	-0.0226718	-0.028629	0.000762838	0.282821	0.73563	0.409543	0.177228	0.17627	0.18997	0.674541
300	HDL	alpha-hydroxyisocaproate	30	TRUE	2.69755	0.312914	-0.0612592	0.346573	-0.446543	-0.0124232	-0.0306349	0.00239696	0.484946	0.862733	0.0577182	0.173874	0.334823	0.0889348	0.674541
81	HDL	1-palmitoyl-2-docosahexaenoyl-GPE (16:0/22:6)*	30	TRUE	3.07453	0.63749	0.0161833	0.0023457	-0.725112	-0.0143688	-0.0230633	0.00532982	0.361213	0.965092	0.987525	0.178381	0.326968	0.232693	0.674541
534	LDL	isovalerylglycine	27	TRUE	5.20191	0.889816	-0.105467	-0.282577	-1.34394	-0.0301059	-0.00834983	0.0115966	0.27781	0.875847	0.590419	0.170413	0.303131	0.833412	0.674541
559	HDL	N-acetylleucine	30	TRUE	3.43945	0.715926	-0.100998	0.434379	-1.10905	-0.0214365	-0.0347578	0.000289974	0.329416	0.781056	0.133591	0.169878	0.153464	0.0603715	0.674541
273	HDL	beta-hydroxyisovalerate	30	TRUE	2.90834	0.544879	0.087101	0.242282	-0.63849	-0.0138959	-0.0287847	0.00142587	0.383128	0.817037	0.343552	0.168422	0.304783	0.1386	0.674541
119	HDL	trimethylamine N-oxide	30	TRUE	3.1318	0.621699	-0.0651051	-0.130347	-1.1903	-0.0165524	-0.0143845	0.000358345	0.385447	0.856644	0.193818	0.167772	0.252271	0.474254	0.674541
198	Triglycerides	1-palmitoyl-2-eicosapentaenoyl-GPC (16:0/20:5)*	34	TRUE	-0.15942	-0.110564	-0.128297	-0.149723	0.267327	-0.0202136	0.059051	0.860637	0.738157	0.781131	0.262405	0.173154	0.0608663	0.0201217	0.674541
546	Glucose	ribitol	36	TRUE	3.10162	-2.12322	-0.329857	-0.715724	2.64748	0.013158	0.0662804	0.08537	0.296301	0.573152	0.33733	0.181364	0.644467	0.120436	0.679517
263	Glucose	1-palmitoyl-2-docosahexaenoyl-GPC (16:0/22:6)	37	TRUE	2.64681	1.73254	-0.101612	0.681377	-1.03197	-0.0115901	0.0847064	0.1835	0.0722853	0.862368	0.185895	0.182077	0.647019	0.0356395	0.679517
100	Triglycerides	1-stearoyl-2-oleoyl-GPC (18:0/18:1)	34	TRUE	-0.77462	-1.43724	-0.183972	0.339599	2.04698	-0.0113533	0.0439336	0.336981	0.276626	0.648391	0.0651172	0.183529	0.249427	0.0616611	0.680487
69	Glucose	2-methylbutyrylcarnitine (C5)	37	TRUE	3.6839	-0.417667	-0.267459	0.0453606	0.761252	-0.00479284	0.0578036	0.0321693	0.593395	0.647486	0.899003	0.184865	0.842591	0.105548	0.68102
84	Glucose	3-hydroxyisobutyrate	36	TRUE	3.98095	-0.932991	0.126233	0.0285279	1.42893	-0.00796241	0.055027	0.0268808	0.431912	0.870904	0.904803	0.186683	0.749087	0.139207	0.682776
2	Glucose	1-pentadecanoyl-2-linoleoyl-GPC (15:0/18:2)*	37	TRUE	3.66007	2.16349	-0.232759	0.121592	-1.72909	-0.0105154	0.069528	0.0346123	0.0894843	0.696596	0.820835	0.188111	0.673522	0.0603911	0.682776
143	Glucose	arabonate/xylonate	37	TRUE	3.98162	1.7778	-0.551395	0.883095	-1.30397	-0.0125158	0.0380817	0.0153856	0.108347	0.328993	0.0283979	0.18981	0.596355	0.293606	0.682776
30	Glucose	sphingomyelin (d18:1/17:0, d17:1/18:0, d19:1/16:0)	37	TRUE	2.34214	2.21609	-0.123857	1.12085	-1.70664	-0.00778691	0.0771904	0.223974	0.108118	0.828997	0.0997955	0.190325	0.750886	0.0438514	0.682776
313	HDL	sphingomyelin (d18:2/16:0, d18:1/16:1)*	30	TRUE	1.75394	0.51744	0.0262491	0.929555	-0.878222	-0.000974049	-0.0356463	0.0917459	0.427529	0.940238	0.0377655	0.191321	0.943572	0.0570308	0.682776
406	Glucose	sphingomyelin (d18:2/16:0, d18:1/16:1)*	37	TRUE	3.20949	2.23853	-0.238508	0.693156	-1.82179	-0.00917551	0.0643582	0.101111	0.104954	0.680801	0.428938	0.203533	0.722732	0.0965896	0.695914
355	Tot-cholesterol	1-palmitoyl-2-docosahexaenoyl-GPE (16:0/22:6)*	30	TRUE	10.1738	1.6501	-0.101162	0.165054	-1.52449	-0.0719882	-0.0331114	3.38545e-05	0.287929	0.902098	0.620815	0.203303	0.0272295	0.441052	0.695914
123	HDL	sphingosine 1-phosphate	30	TRUE	2.86153	0.751518	0.0155802	0.109404	-1.21648	-0.0132702	-0.0214093	0.00425727	0.362401	0.966283	0.739122	0.202182	0.350061	0.288687	0.695914
455	Glucose	1-stearoyl-2-oleoyl-GPC (18:0/18:1)	37	TRUE	4.12977	2.51119	-0.214322	0.214895	-2.21675	-0.0150798	0.0595247	0.0405859	0.103339	0.713871	0.523168	0.196881	0.58582	0.100707	0.695914
438	Triglycerides	1-palmitoyl-2-oleoyl-GPC (16:0/18:1)	34	TRUE	-1.38444	-1.26736	-0.237646	0.355926	1.68468	-0.00620518	0.0544358	0.13419	0.301545	0.591486	0.212096	0.200811	0.603979	0.0194677	0.695914
401	LDL	N-acetylvaline	30	TRUE	5.67798	1.46245	-0.296245	-0.52561	-1.37191	-0.0096301	-0.0600052	0.000746577	0.214214	0.656407	0.433696	0.197498	0.727159	0.100622	0.695914
371	Triglycerides	succinate	34	TRUE	0.363752	-0.620064	-0.108278	-0.542687	0.826295	-0.0285886	0.0703689	0.744257	0.362007	0.808966	0.146542	0.200958	0.0413109	0.00357602	0.695914
125	LDL	4-methyl-2-oxopentanoate	30	TRUE	6.02922	1.20235	-0.104974	0.439052	-0.857304	-0.0437603	-0.0391938	0.0007227	0.27669	0.88293	0.264137	0.205644	0.0969887	0.282454	0.696289
83	Glucose	N-acetylleucine	37	TRUE	3.81054	-1.35669	-0.285924	0.0691802	2.16122	-0.00755563	0.059171	0.026667	0.377498	0.622403	0.895722	0.206082	0.768981	0.110075	0.696289
36	Glucose	citrate	37	TRUE	3.79274	-1.05234	-0.257644	-0.423299	1.43785	-0.00279464	0.0670984	0.0280032	0.435807	0.656215	0.397476	0.213778	0.912351	0.0834136	0.701536
182	Tot-cholesterol	1-pentadecanoyl-2-linoleoyl-GPC (15:0/18:2)*	30	TRUE	8.82041	-1.53888	0.400679	2.06322	1.15542	-0.062685	-0.0649104	1.66612e-11	0.0924448	0.449165	1.05081e-06	0.211808	0.000735124	0.0130468	0.701536
513	Tot-cholesterol	1-stearoyl-2-dihomo-linolenoyl-GPC (18:0/20:3n3 or 6)*	30	TRUE	9.38401	-1.28438	-0.239233	0.711615	1.49221	-0.0524252	-0.0692873	1.22459e-06	0.230911	0.746403	0.0642942	0.212557	0.0546806	0.0695836	0.701536
11	Glucose	phosphate	37	TRUE	6.05154	23.88	-0.246872	-1.57976	-23.4068	-0.00958999	0.0416457	0.0403002	0.199846	0.666035	0.500808	0.210266	0.6983	0.300148	0.701536
122	Triglycerides	fumarate	34	TRUE	-0.27249	-0.86575	-0.107915	-0.517829	1.05947	-0.0148624	0.0649798	0.828424	0.337694	0.81791	0.30622	0.211735	0.271356	0.00843061	0.701536
27	HDL	alpha-hydroxyisovalerate	30	TRUE	2.52281	0.679454	0.0531462	0.275877	-0.827991	-0.00798906	-0.0301363	0.0047486	0.362089	0.877323	0.0400555	0.216977	0.550232	0.107775	0.707087
195	Tot-cholesterol	glycerophosphorylcholine (GPC)	30	TRUE	8.40839	-1.75812	-0.821076	1.36952	1.60626	-0.0516697	-0.0574703	7.0005e-06	0.175175	0.252984	0.0205443	0.218896	0.0385467	0.107721	0.707087
319	Glucose	sphinganine-1-phosphate	31	TRUE	5.644	5.60548	-0.250956	-0.573887	-6.13962	-0.026414	0.0602923	0.00651959	0.187154	0.674747	0.307027	0.220279	0.405475	0.186575	0.707087
452	Triglycerides	N-acetylisoleucine	34	TRUE	-0.635242	1.41825	-0.0771784	0.0716999	-1.12261	-0.0165976	0.0596847	0.505029	0.156036	0.871473	0.799412	0.22197	0.133683	0.0154406	0.707087
514	Tot-cholesterol	1-stearoyl-2-docosapentaenoyl-GPC (18:0/22:5n6)*	30	TRUE	9.88511	-1.37873	-0.284861	0.135967	1.22371	-0.0502847	-0.0711355	3.94243e-06	0.188747	0.725153	0.635457	0.222716	0.11352	0.104866	0.707087
557	HDL	palmitoyl dihydrosphingomyelin (d18:0/16:0)*	30	TRUE	2.69272	0.34636	0.0288891	0.242564	-0.658039	-0.0126087	-0.0213224	0.00772022	0.522587	0.937811	0.417183	0.2229	0.370875	0.280473	0.707087
343	Glucose	tiglylcarnitine (C5:1-DC)	37	TRUE	3.46105	-0.644661	-0.270604	0.419675	1.07054	-0.00734215	0.0563062	0.0441538	0.539764	0.623743	0.207915	0.224958	0.755746	0.104769	0.708482
569	HDL	malate	29	TRUE	2.86919	-1.39056	0.0638707	0.256787	0.953283	-0.0126672	-0.0279106	0.00194199	0.117225	0.859202	0.16636	0.225821	0.357308	0.121923	0.708482
134	Triglycerides	3-hydroxy-2-ethylpropionate	34	TRUE	-1.0444	1.40634	0.0411415	0.546256	-1.04515	-0.0220746	0.0675845	0.246308	0.185218	0.925175	0.0879618	0.228528	0.0354132	0.00593978	0.709181
531	Glucose	N-palmitoyl-sphingosine (d18:1/16:0)	37	TRUE	2.78749	-2.76619	-0.249013	0.656654	3.30664	0.00602949	0.0445209	0.191556	0.317761	0.660829	0.342306	0.227886	0.815755	0.243999	0.709181
461	LDL	2-hydroxy-3-methylvalerate	30	TRUE	6.34729	0.520427	-0.157179	-0.0180734	-0.432242	-0.0403184	-0.0321142	0.000388715	0.418145	0.823945	0.926452	0.229997	0.11925	0.380383	0.709883
40	Triglycerides	1-palmitoyl-2-adrenoyl-GPC (16:0/22:4)*	34	TRUE	-1.04476	-0.485112	-0.191346	0.13254	1.13302	-0.0113612	0.060791	0.218969	0.475804	0.664598	0.265864	0.23154	0.301116	0.0077735	0.710804
485	Glucose	lactate	37	TRUE	2.03434	-1.08897	-0.465125	0.930041	1.66689	0.0140602	0.0448573	0.25802	0.432401	0.393853	0.111403	0.232836	0.572758	0.202327	0.710959
405	Triglycerides	isobutyrylglycine	34	TRUE	-0.43174	-0.511675	-0.16696	-0.167086	0.718426	-0.0179872	0.064074	0.64397	0.429139	0.714577	0.356162	0.235302	0.115796	0.00660624	0.714666
275	Glucose	1-myristoyl-2-linoleoyl-GPC (14:0/18:2)*	37	TRUE	4.30876	1.66275	-0.240986	-0.223137	-1.42137	-0.0191578	0.0770902	0.0127333	0.11394	0.676326	0.562211	0.241102	0.452864	0.0480176	0.727322
49	Glucose	arabitol/xylitol	37	TRUE	3.38777	2.38808	-0.3794	0.513388	-1.46809	-0.00268857	0.0438229	0.0558426	0.146856	0.515803	0.286051	0.242016	0.915843	0.269343	0.727322
433	Glucose	1,2-dipalmitoyl-GPC (16:0/16:0)	37	TRUE	3.86174	2.55682	-0.187047	0.295658	-2.08247	-0.0152521	0.0665068	0.0336297	0.147849	0.749575	0.603311	0.24548	0.552666	0.0771404	0.733869
266	Triglycerides	1-stearoyl-2-docosapentaenoyl-GPC (18:0/22:5n3)*	34	TRUE	-0.533737	-0.296613	-0.259247	0.405531	0.615478	-0.0144627	0.0380906	0.517494	0.583822	0.513206	0.0557016	0.248674	0.117634	0.0879004	0.739546
349	Glucose	ribonate	37	TRUE	3.39695	1.55093	-0.32261	0.328179	-0.910603	-0.000464181	0.0492297	0.0559573	0.117859	0.581213	0.34958	0.251018	0.9867	0.203256	0.741438
208	LDL	1-stearoyl-2-arachidonoyl-GPI (18:0/20:4)	30	TRUE	6.7043	2.67008	-0.133818	-0.595106	-2.0588	-0.0415858	-0.0213874	0.000119179	0.24838	0.845193	0.215672	0.251907	0.0945607	0.551083	0.741438
72	HDL	1-margaroyl-2-oleoyl-GPC (17:0/18:1)*	30	TRUE	1.67262	0.677057	0.0264818	0.643273	-1.00697	-0.00410256	-0.0175607	0.146684	0.43121	0.94076	0.0745295	0.253364	0.772209	0.366679	0.741901
219	Glucose	trimethylamine N-oxide	37	TRUE	4.06785	1.16302	-0.0507719	0.363146	-0.583287	-0.0177571	0.0608284	0.0260335	0.0667733	0.929931	0.0674893	0.254946	0.504895	0.0860832	0.742576
418	Tot-cholesterol	N-acetylvaline	30	TRUE	10.2095	1.39353	-0.294004	-0.171005	-1.45653	-0.0509065	-0.0694311	4.86764e-07	0.326012	0.714066	0.832595	0.256195	0.125866	0.114897	0.742576
56	HDL	tricosanoyl sphingomyelin (d18:1/23:0)*	22	TRUE	3.44309	0.909549	0.0842728	0.016324	-1.21477	-0.0232729	-0.0173685	0.00646898	0.41593	0.840154	0.974993	0.258051	0.234393	0.575863	0.744179
7	LDL	1-palmitoyl-2-oleoyl-GPI (16:0/18:1)*	29	TRUE	6.40188	-0.969152	-0.0528254	-0.292702	0.779763	-0.0350652	-0.0389849	0.00142904	0.269006	0.941382	0.428595	0.261894	0.208121	0.278866	0.747707
274	HDL	fructose	30	TRUE	2.96009	0.489337	-0.0106941	-0.0102365	-0.685408	-0.00972121	-0.0290086	0.00462367	0.478774	0.976656	0.976881	0.260612	0.480857	0.125089	0.747707
462	Triglycerides	1-myristoyl-2-palmitoyl-GPC (14:0/16:0)	34	TRUE	-0.186845	-0.343089	-0.0845941	0.0640292	0.80354	-0.0190797	0.0490446	0.837666	0.552304	0.855181	0.731091	0.267139	0.0860336	0.0826824	0.754724
424	Triglycerides	trimethylamine N-oxide	34	TRUE	-0.859909	-0.521843	-0.10386	0.0034179	0.699935	-0.0102848	0.0567616	0.344919	0.465805	0.82525	0.972086	0.26727	0.429309	0.0239775	0.754724
448	LDL	palmitoyl-linoleoyl-glycerol (16:0/18:2) [2]*	29	TRUE	5.46731	0.367475	-0.110301	0.215446	-0.469703	-0.0300453	-0.0317078	0.0131419	0.527086	0.881227	0.463281	0.268317	0.3157	0.401658	0.754724
209	HDL	methylsuccinate	30	TRUE	3.03752	-0.636235	-0.00987603	-0.0619111	0.25854	-0.0151832	-0.0169599	0.00123044	0.112125	0.979422	0.678389	0.321438	0.317126	0.442484	0.762994
132	HDL	succinylcarnitine (C4-DC)	30	TRUE	2.89166	0.400296	0.0402756	0.0734406	-0.598509	-0.0106837	-0.0279235	0.00210831	0.569747	0.919882	0.752497	0.319208	0.427551	0.143484	0.762994
347	HDL	isovalerylcarnitine (C5)	30	TRUE	2.97156	0.0765808	0.00771522	0.0360034	-0.310566	-0.0120999	-0.0260433	0.00156532	0.84913	0.98349	0.819022	0.317909	0.379122	0.186698	0.762994
409	Triglycerides	1-stearoyl-2-linoleoyl-GPI (18:0/18:2)	34	TRUE	-0.942997	1.28654	-0.0198208	0.264186	-0.947672	-0.0136846	0.0587391	0.29381	0.245353	0.965544	0.435129	0.321761	0.223429	0.014346	0.762994
468	Tot-cholesterol	palmitoyl-linoleoyl-glycerol (16:0/18:2) [2]*	29	TRUE	9.63862	0.255893	-0.123988	0.273537	-0.488707	-0.0610636	-0.0406458	0.000136618	0.700806	0.883505	0.416551	0.314991	0.0752359	0.348284	0.762994
52	Triglycerides	1-palmitoyl-2-arachidonoyl-GPI (16:0/20:4)*	32	TRUE	-1.16207	-0.290047	-0.0151318	0.573437	0.341274	-0.00621679	0.0367717	0.0411537	0.510263	0.960056	3.24148e-05	0.309732	0.398322	0.0323505	0.762994
447	HDL	4-methyl-2-oxopentanoate	30	TRUE	2.74659	0.278734	0.0324755	0.314752	-0.348422	-0.0135161	-0.0312947	0.00248393	0.620351	0.928695	0.115837	0.312305	0.313972	0.0918367	0.762994
410	LDL	1-palmitoyl-2-docosahexaenoyl-GPC (16:0/22:6)	30	TRUE	4.01462	0.609343	0.0202346	0.936556	-0.703524	-0.0264619	-0.0182781	0.0430447	0.480662	0.976547	0.0477445	0.310454	0.301236	0.631757	0.762994
164	Tot-cholesterol	alpha-ketoglutarate	30	TRUE	10.6961	1.36883	-0.112599	0.136808	-0.755	-0.0821428	-0.0299898	4.46119e-07	0.4165	0.891992	0.602411	0.310253	0.01483	0.524335	0.762994
142	Tot-cholesterol	beta-hydroxyisovalerate	30	TRUE	10.8756	1.04334	-0.393195	-0.695513	-0.943544	-0.072783	-0.0189703	7.42026e-09	0.418225	0.612677	0.187507	0.323845	0.00917456	0.636124	0.762994
390	LDL	isobutyrylcarnitine (C4)	30	TRUE	5.56566	1.01249	-0.422705	-0.418701	-0.953001	-0.0270217	-0.0180194	0.00188762	0.380084	0.547243	0.152834	0.314627	0.334411	0.608927	0.762994
248	Tot-cholesterol	2-methylbutyrylcarnitine (C5)	30	TRUE	10.7613	0.49801	-0.273744	-0.150098	-0.605435	-0.0705801	-0.0442391	9.97275e-08	0.554187	0.739715	0.702831	0.324458	0.0138821	0.274017	0.762994
288	LDL	sphingomyelin (d18:1/20:1, d18:2/20:0)*	30	TRUE	5.38786	-1.9478	-0.195162	0.500769	1.80885	-0.0184606	-0.0643789	0.00717701	0.288743	0.787706	0.637874	0.336294	0.505326	0.102083	0.762994
252	Tot-cholesterol	1-stearoyl-2-docosahexaenoyl-GPE (18:0/22:6)*	30	TRUE	10.4753	0.639515	-0.107941	0.107016	-0.646649	-0.0780942	-0.0275588	1.49266e-05	0.518901	0.896947	0.743464	0.329094	0.0251269	0.555509	0.762994
428	HDL	sphingomyelin (d18:1/14:0, d16:1/16:0)*	30	TRUE	2.46925	0.234585	-0.0964087	0.482671	-0.549361	-0.00845576	-0.0304428	0.0134768	0.682168	0.797861	0.228362	0.329975	0.537858	0.113057	0.762994
563	Triglycerides	beta-hydroxyisovalerate	34	TRUE	-0.319942	-0.561898	-0.116944	-0.355373	0.593711	-0.0201575	0.0753219	0.705379	0.500921	0.792326	0.116625	0.330668	0.0693763	0.0046459	0.762994
75	Tot-cholesterol	methylsuccinate	30	TRUE	10.228	0.528076	-0.227755	0.116998	-0.560172	-0.0540342	-0.0743657	8.88968e-07	0.551476	0.788193	0.723402	0.331921	0.107852	0.128278	0.762994
60	Glucose	1,2-dilinoleoyl-GPC (18:2/18:2)	37	TRUE	3.57656	1.41387	-0.249503	0.265247	-0.986276	-0.00791233	0.0622964	0.0431395	0.144257	0.670569	0.520931	0.332284	0.751405	0.0912911	0.762994
185	Glucose	glycerophosphoethanolamine	37	TRUE	5.15553	-0.604606	-0.288845	-0.704799	1.25493	-0.0166	0.0578909	0.00494166	0.597685	0.612002	0.103354	0.333726	0.505331	0.119367	0.762994
65	HDL	ribonate	30	TRUE	3.04382	-0.781224	0.0053411	-0.0474387	0.403788	-0.0144615	-0.0199723	0.00118407	0.153639	0.988714	0.78908	0.333952	0.325585	0.34212	0.762994
369	Glucose	stearoyl sphingomyelin (d18:1/18:0)	37	TRUE	2.10484	2.25587	-0.12933	1.40939	-1.75223	-0.00129903	0.0601494	0.29582	0.215921	0.821718	0.0966294	0.334957	0.960092	0.120735	0.762994
80	HDL	palmitoyl-linoleoyl-glycerol (16:0/18:2) [1]*	28	TRUE	3.40659	-0.541465	-0.0510274	-0.260248	0.312394	-0.0108958	-0.0351733	0.00216143	0.157211	0.891395	0.157354	0.337834	0.483166	0.0733186	0.762994
280	HDL	stearoyl sphingomyelin (d18:1/18:0)	30	TRUE	2.77214	0.602436	0.0239492	0.178058	-0.882807	-0.0124568	-0.0225886	0.0167712	0.519424	0.949121	0.702697	0.338069	0.415987	0.273895	0.762994
284	HDL	sphingomyelin (d18:1/18:1, d18:2/18:0)	30	TRUE	2.83759	0.538644	0.0220501	0.160121	-0.833995	-0.012869	-0.0230902	0.0121042	0.523876	0.95305	0.744012	0.325258	0.398772	0.264377	0.762994
341	Triglycerides	sphingosine	27	TRUE	-2.11347	-0.49301	0.0752037	0.539168	0.626348	0.013385	0.0265855	0.0391904	0.571196	0.844918	0.00278962	0.309506	0.347252	0.318064	0.762994
169	LDL	1-palmitoyl-2-adrenoyl-GPC (16:0/22:4)*	30	TRUE	6.67794	-0.899903	-0.155315	-0.121985	0.868375	-0.0388615	-0.0436988	0.000880473	0.244264	0.829523	0.548287	0.282599	0.166	0.23039	0.762994
419	Glucose	1-stearoyl-2-docosahexaenoyl-GPC (18:0/22:6)	37	TRUE	3.03966	1.3226	-0.234327	0.470209	-0.67468	-0.010152	0.0758272	0.115297	0.119322	0.68791	0.268434	0.308859	0.694319	0.0558322	0.762994
173	Glucose	1-margaroyl-2-oleoyl-GPC (17:0/18:1)*	37	TRUE	2.83816	2.53769	-0.251745	0.759788	-2.06104	-0.0102941	0.0766016	0.183319	0.173255	0.665444	0.296096	0.27636	0.699397	0.0486494	0.762994
189	Tot-cholesterol	1-palmitoyl-2-adrenoyl-GPC (16:0/22:4)*	30	TRUE	9.70862	-1.04257	-0.284337	0.160899	0.986741	-0.0555691	-0.0528808	1.67232e-05	0.229808	0.725672	0.480885	0.277089	0.0778696	0.196363	0.762994
554	Triglycerides	1-oleoyl-2-dihomo-linolenoyl-GPC (18:1/20:3)*	34	TRUE	-0.545978	0.836791	-0.0922293	0.0929472	-0.729781	-0.0196711	0.0624462	0.545569	0.159338	0.843891	0.561831	0.282594	0.0770957	0.0108588	0.762994
26	HDL	behenoyl sphingomyelin (d18:1/22:0)*	30	TRUE	2.76896	0.593684	0.0238787	0.190608	-0.938654	-0.012907	-0.0219316	0.00825563	0.496075	0.949096	0.627372	0.309215	0.37185	0.28395	0.762994
78	Glucose	phenol sulfate	37	TRUE	4.04416	0.0374712	-0.264313	-0.0120319	0.282458	-0.00882896	0.0564563	0.0190886	0.947686	0.653603	0.916643	0.284207	0.721236	0.12515	0.762994
113	HDL	isovalerylglycine	27	TRUE	2.21736	0.194321	0.0275282	0.156459	-0.522323	-0.00597397	-0.0183065	0.0307463	0.634176	0.934743	0.549605	0.284727	0.681609	0.354513	0.762994
464	Tot-cholesterol	alpha-hydroxyisovalerate	30	TRUE	10.7803	1.60443	-0.147507	0.00470392	-1.72007	-0.0788464	-0.0328339	4.87953e-07	0.369528	0.858218	0.988354	0.284879	0.0139539	0.46501	0.762994
243	HDL	1-palmitoyl-2-linoleoyl-GPI (16:0/18:2)	29	TRUE	2.76649	0.105498	0.0405077	0.201956	-0.376513	-0.0100414	-0.027367	0.00988256	0.800625	0.914775	0.466279	0.286231	0.506588	0.168643	0.762994
444	HDL	2-methylcitrate/homocitrate	23	TRUE	3.06518	-1.55772	-0.0534824	0.246903	1.34525	-0.0136889	-0.0295237	0.0100798	0.193286	0.889733	0.466483	0.287032	0.426625	0.184743	0.762994
445	LDL	alpha-hydroxyisovalerate	30	TRUE	6.89329	1.37838	-0.164835	-0.25357	-1.45876	-0.0504781	-0.0181114	0.000177496	0.368952	0.816035	0.359127	0.290527	0.0666171	0.638587	0.762994
467	Glucose	1-stearoyl-2-linoleoyl-GPE (18:0/18:2)*	37	TRUE	2.27166	-0.366515	-0.45065	0.518895	0.865568	0.0113993	0.0543582	0.199654	0.70109	0.406566	0.0444211	0.292922	0.64089	0.107656	0.762994
127	Triglycerides	lactate	34	TRUE	-2.40084	-0.345529	-0.117481	0.749315	0.754505	0.00463475	0.0521308	0.0290666	0.630481	0.777374	0.0733201	0.293729	0.728408	0.0190907	0.762994
16	HDL	sphingomyelin (d18:2/23:0, d18:1/23:1, d17:1/24:1)*	30	TRUE	2.72319	0.365909	0.0477572	0.250098	-0.642636	-0.0122425	-0.0231214	0.0146855	0.550721	0.899265	0.625566	0.295084	0.391045	0.23664	0.762994
269	Triglycerides	isobutyrylcarnitine (C4)	34	TRUE	0.110068	-0.3519	0.0412766	0.335747	0.456155	-0.0260313	0.0426654	0.887813	0.487888	0.917424	0.0549734	0.29804	0.00702506	0.0553756	0.762994
456	HDL	1-palmitoyl-2-eicosapentaenoyl-GPC (16:0/20:5)*	30	TRUE	2.71972	-0.00684641	0.00077885	0.10461	-0.19655	-0.0107905	-0.0228861	0.00670821	0.982709	0.998332	0.452083	0.298609	0.442883	0.244529	0.762994
479	Tot-cholesterol	1-stearoyl-2-linoleoyl-GPC (18:0/18:2)*	30	TRUE	7.16234	-3.175	0.209389	2.4919	3.19494	-0.039861	-0.072991	0.000129619	0.264778	0.755691	0.000541026	0.300135	0.113109	0.040198	0.762994
322	LDL	1-margaroyl-2-oleoyl-GPC (17:0/18:1)*	30	TRUE	4.80077	-1.87673	-0.232182	0.510712	1.80046	-0.0161022	-0.0496107	0.0345644	0.268322	0.740971	0.472558	0.300138	0.564312	0.195716	0.762994
205	Tot-cholesterol	1-stearoyl-2-docosahexaenoyl-GPC (18:0/22:6)	30	TRUE	8.28667	0.506748	-0.0349136	0.907054	-0.700923	-0.0572368	-0.0287101	0.000166408	0.559809	0.964351	0.0437147	0.301672	0.0524801	0.501815	0.762994
102	Glucose	sphingomyelin (d18:2/23:0, d18:1/23:1, d17:1/24:1)*	37	TRUE	2.9613	1.67984	-0.208805	0.897989	-1.2297	-0.0086411	0.0661156	0.136609	0.155937	0.721456	0.326163	0.301674	0.734306	0.0855001	0.762994
374	Glucose	sphingomyelin (d18:1/18:1, d18:2/18:0)	37	TRUE	2.30396	2.18888	-0.202961	1.42061	-1.76905	-0.00258888	0.0582602	0.252789	0.194703	0.723701	0.129816	0.303053	0.92097	0.133414	0.762994
421	Triglycerides	isovalerylglycine	31	TRUE	0.119385	-0.307711	-0.214399	-0.447013	0.530296	-0.0257988	0.0702434	0.915056	0.549386	0.617222	0.0805418	0.307778	0.0448876	0.00371246	0.762994
393	Triglycerides	1-palmitoyl-2-docosahexaenoyl-GPE (16:0/22:6)*	34	TRUE	0.146931	-0.599411	-0.0752723	0.103228	0.604592	-0.0235258	0.0448296	0.884409	0.405244	0.867591	0.580474	0.27442	0.029119	0.090222	0.762994
236	Glucose	1-palmitoyl-2-oleoyl-GPC (16:0/18:1)	37	TRUE	3.77857	2.62491	-0.206925	0.349864	-2.27073	-0.0113853	0.058549	0.0696474	0.16343	0.723285	0.445748	0.273654	0.690613	0.109986	0.762994
212	Tot-cholesterol	1-palmitoyl-2-oleoyl-GPI (16:0/18:1)*	29	TRUE	10.14	-1.16224	-0.196017	-0.0572611	0.780235	-0.0600647	-0.0515643	1.77947e-05	0.260091	0.816685	0.895328	0.340217	0.0669774	0.223667	0.764819
187	LDL	1-stearoyl-2-docosahexaenoyl-GPC (18:0/22:6)	30	TRUE	4.43689	0.485513	-0.0437672	0.715167	-0.573728	-0.026991	-0.0235606	0.0237806	0.530991	0.949903	0.0745623	0.343115	0.305159	0.536534	0.768308
564	Triglycerides	fructose	34	TRUE	-0.125485	-0.52264	-0.113696	-0.06089	0.70061	-0.0230229	0.0599148	0.90389	0.523614	0.807795	0.856509	0.347382	0.0504384	0.0140513	0.774826
261	Tot-cholesterol	1-stearoyl-2-linoleoyl-GPE (18:0/18:2)*	30	TRUE	9.54439	0.712683	-0.184683	0.233844	-0.894436	-0.0567587	-0.0468169	0.000169671	0.519638	0.822936	0.508518	0.349906	0.104347	0.262216	0.777418
510	LDL	sphingomyelin (d18:1/18:1, d18:2/18:0)	30	TRUE	5.33483	-1.59763	-0.237015	0.408372	1.44699	-0.0181404	-0.0603361	0.0136347	0.322868	0.740689	0.663199	0.372127	0.533944	0.127238	0.786979
82	HDL	glycerophosphoethanolamine	30	TRUE	1.97093	0.223807	0.065578	0.55109	-0.504422	-0.00555482	-0.0226697	0.0263513	0.656253	0.842885	0.00546574	0.371619	0.648746	0.193276	0.786979
197	LDL	pyruvate	30	TRUE	6.48632	0.873729	-0.115408	-0.0989257	-0.395655	-0.0459129	-0.0172167	0.000258585	0.449963	0.870913	0.393057	0.371443	0.0959981	0.663104	0.786979
373	HDL	2-methylbutyrylcarnitine (C5)	30	TRUE	2.74163	0.0340692	0.0874342	0.186842	-0.25641	-0.00942155	-0.0302386	0.00358502	0.930801	0.819863	0.30815	0.370506	0.480947	0.108601	0.786979
231	LDL	1-stearoyl-2-docosahexaenoyl-GPE (18:0/22:6)*	30	TRUE	5.95626	0.571934	-0.0955216	0.131911	-0.525814	-0.0408168	-0.0230393	0.00505347	0.511216	0.896151	0.645952	0.366145	0.182556	0.574627	0.786979
317	Glucose	sphingomyelin (d17:1/16:0, d18:1/15:0, d16:1/17:0)*	37	TRUE	3.42029	1.75931	-0.248078	0.331298	-1.24322	-0.0103513	0.0711205	0.0806053	0.201872	0.672751	0.678782	0.36562	0.678686	0.0678261	0.786979
403	HDL	lactate	30	TRUE	3.13764	0.373677	0.0122015	-0.0798243	-0.692326	-0.0146632	-0.0218558	0.00273111	0.615281	0.973791	0.803301	0.367808	0.300241	0.276723	0.786979
470	HDL	sphingomyelin (d18:2/24:1, d18:1/24:2)*	30	TRUE	2.6973	0.253792	0.0290632	0.156178	-0.554001	-0.0101471	-0.0243262	0.0226689	0.676854	0.938922	0.687078	0.361617	0.497541	0.213723	0.786979
155	Triglycerides	phosphatidylcholine (18:0/20:5, 16:0/22:5n6)*	34	TRUE	-0.173515	-0.0896929	-0.113954	-0.0846973	0.253896	-0.0198836	0.0558213	0.853173	0.818945	0.809214	0.692908	0.360265	0.071651	0.0339727	0.786979
28	Glucose	1,5-anhydroglucitol (1,5-AG)	37	TRUE	6.13161	1.09292	-0.0444707	-0.724576	-0.954648	-0.0313761	0.0597108	0.00150822	0.273375	0.936483	0.146201	0.360093	0.232189	0.108752	0.786979
224	Glucose	sphingosine 1-phosphate	37	TRUE	3.49381	-0.919788	-0.32358	0.0376481	1.69002	0.00162786	0.0507692	0.0718335	0.574903	0.583109	0.952417	0.358412	0.953052	0.186414	0.786979
314	LDL	succinate	30	TRUE	6.655	4.74508	-0.26817	-0.592297	-6.73416	-0.0363325	-0.0375366	0.000879854	0.37294	0.7181	0.614795	0.357799	0.160296	0.305828	0.786979
91	Glucose	malate	36	TRUE	4.58259	1.89456	-0.0655447	0.97187	-1.40361	-0.0284104	0.0470638	0.00478243	0.271231	0.90243	0.0063243	0.364836	0.238433	0.159738	0.786979
530	Triglycerides	1-palmitoyl-2-linoleoyl-GPI (16:0/18:2)	33	TRUE	-1.02328	0.480459	0.214391	0.510979	-0.270649	-0.0125522	0.049032	0.159736	0.230509	0.577427	0.00698697	0.375645	0.155365	0.0198618	0.791488
86	Triglycerides	isoleucine	34	TRUE	-0.350009	-0.892268	-0.113833	-0.271393	1.07606	-0.0164877	0.0623471	0.720311	0.506755	0.807103	0.711329	0.394927	0.137487	0.0199684	0.793788
57	HDL	3-methylglutaconate	27	TRUE	3.18035	-2.42111	-0.0910005	-0.167388	1.74367	-0.0105489	-0.0282973	0.000901508	0.358241	0.810295	0.381969	0.398979	0.439727	0.152499	0.793788
570	HDL	galactonate	22	TRUE	3.14087	0.467871	-0.0853963	-0.066855	-0.221514	-0.00535881	-0.0429724	0.00164395	0.455312	0.826037	0.417928	0.396361	0.731936	0.0901569	0.793788
354	HDL	1-stearoyl-2-arachidonoyl-GPI (18:0/20:4)	30	TRUE	2.88142	0.779946	-0.00626337	0.0694493	-0.83411	-0.0105896	-0.027104	0.00251244	0.537819	0.986676	0.791762	0.396328	0.436622	0.167441	0.793788
101	Triglycerides	1-stearoyl-2-docosahexaenoyl-GPE (18:0/22:6)*	34	TRUE	0.0330833	-0.231295	-0.0911392	0.151303	0.285697	-0.0200428	0.0397693	0.972417	0.623744	0.838105	0.401963	0.396056	0.0541227	0.142896	0.793788
89	Tot-cholesterol	lactate	30	TRUE	11.442	1.08795	-0.158132	-0.442527	-1.42814	-0.0823185	-0.033566	5.76546e-07	0.503273	0.845559	0.527592	0.395401	0.00780356	0.444746	0.793788
23	Tot-cholesterol	glucose	30	TRUE	12.1552	2.01497	-0.135197	-1.46957	-1.74347	-0.0856301	-0.0133467	8.0578e-09	0.396842	0.860176	0.123223	0.394891	0.00309924	0.750023	0.793788
67	HDL	palmitoyl sphingomyelin (d18:1/16:0)	30	TRUE	2.6551	0.49358	0.0336859	0.214311	-0.776313	-0.0104319	-0.0242064	0.048532	0.593834	0.930246	0.725223	0.398641	0.480421	0.217555	0.793788
532	Tot-cholesterol	sphingomyelin (d18:1/18:1, d18:2/18:0)	30	TRUE	9.77983	-1.85853	-0.269856	0.310526	1.60137	-0.0513842	-0.0691076	8.48462e-05	0.317542	0.7433	0.773486	0.390637	0.125696	0.128963	0.793788
115	Tot-cholesterol	sphingomyelin (d18:2/14:0, d18:1/14:1)*	30	TRUE	9.99258	0.378873	0.381302	1.76707	-0.906432	-0.0599304	-0.0999387	1.59488e-07	0.704873	0.645962	0.0512463	0.384329	0.036015	0.0243664	0.793788
128	LDL	1-palmitoyl-2-stearoyl-GPC (16:0/18:0)	30	TRUE	3.34144	-1.04568	-0.236378	1.31477	0.938144	-0.00706411	-0.0440944	0.0824219	0.3212	0.699232	0.03314	0.384545	0.764782	0.17151	0.793788
332	LDL	palmitoyl-linoleoyl-glycerol (16:0/18:2) [1]*	28	TRUE	5.72828	0.429431	-0.145942	0.214471	-0.573147	-0.0334082	-0.0329289	0.0110467	0.580426	0.847415	0.565846	0.386244	0.289422	0.40875	0.793788
549	LDL	sphingomyelin (d18:2/16:0, d18:1/16:1)*	30	TRUE	3.75451	-1.18855	-0.209526	1.61009	1.01544	-0.00348699	-0.0749657	0.0405316	0.301056	0.734174	0.0411678	0.391262	0.885669	0.0231423	0.793788
414	Glucose	1-palmitoyl-2-arachidonoyl-GPI (16:0/20:4)*	36	TRUE	4.0694	1.34771	-0.226767	-0.00613224	-0.689901	-0.0147027	0.0686428	0.0318624	0.17917	0.717865	0.984204	0.387197	0.600484	0.0922096	0.793788
289	Triglycerides	3-methyl-2-oxovalerate	34	TRUE	0.261672	-0.46331	0.00764721	0.389948	0.819523	-0.032839	0.0471012	0.797097	0.608661	0.985986	0.0904822	0.387126	0.00905484	0.0576311	0.793788
425	Glucose	1-palmitoyl-2-oleoyl-GPI (16:0/18:1)*	36	TRUE	3.71134	1.25577	-0.319897	0.105273	-0.615798	-0.00789996	0.0620282	0.0446975	0.167367	0.606726	0.703608	0.389466	0.766579	0.116853	0.793788
394	HDL	choline	30	TRUE	2.19191	1.46299	0.0445	0.715869	-1.81172	-0.010151	-0.0247462	0.0734395	0.491149	0.90531	0.331578	0.404977	0.47716	0.21878	0.802924
553	Glucose	1-palmitoyl-2-eicosapentaenoyl-GPC (16:0/20:5)*	37	TRUE	3.64975	0.961803	-0.247522	0.143911	-0.304601	-0.0105439	0.0675981	0.0472719	0.126368	0.674364	0.593083	0.42093	0.681612	0.0786557	0.805237
545	Glucose	1-stearoyl-2-oleoyl-GPE (18:0/18:1)	34	TRUE	3.1807	-0.0364102	-0.437437	0.231336	0.336158	0.00309065	0.0525397	0.0925499	0.955922	0.464533	0.365421	0.41964	0.907011	0.162166	0.805237
345	Tot-cholesterol	1-margaroyl-2-oleoyl-GPC (17:0/18:1)*	30	TRUE	7.2318	-1.72051	-0.237406	1.40956	1.50029	-0.0355728	-0.0507676	0.00289359	0.342362	0.751804	0.063593	0.419176	0.233434	0.215402	0.805237
400	HDL	fumarate	30	TRUE	2.67161	0.502942	0.0676349	0.409024	-0.8335	-0.0138299	-0.0236851	0.00419776	0.60821	0.855416	0.19357	0.418911	0.311664	0.214979	0.805237
320	LDL	palmitoyl sphingomyelin (d18:1/16:0)	30	TRUE	1.92284	1.05594	0.151207	2.58729	-1.28935	-0.00821181	-0.0361058	0.408755	0.509442	0.820267	0.0141405	0.417593	0.74807	0.287558	0.805237
527	Triglycerides	mannose	34	TRUE	-1.33143	0.877045	0.086219	0.696576	-0.60212	-0.0185864	0.0636579	0.174204	0.428809	0.827715	0.0179642	0.421656	0.0573615	0.00673496	0.805237
426	Glucose	1-stearoyl-2-arachidonoyl-GPC (18:0/20:4)	37	TRUE	3.27198	-0.282569	-0.348049	0.142175	0.682013	0.00344233	0.0502271	0.0727523	0.78553	0.552795	0.759948	0.416196	0.897786	0.184655	0.805237
279	LDL	behenoyl sphingomyelin (d18:1/22:0)*	30	TRUE	4.19617	-1.24545	-0.189316	1.38006	1.3021	-0.0127828	-0.0663336	0.0210015	0.410331	0.770416	0.0427188	0.416041	0.610101	0.061687	0.805237
473	Tot-cholesterol	sphingomyelin (d18:1/20:1, d18:2/20:0)*	30	TRUE	9.97518	-2.0273	-0.247934	0.255014	1.79157	-0.0534253	-0.0696007	1.93565e-05	0.34328	0.769043	0.837009	0.413717	0.098004	0.129273	0.805237
303	Triglycerides	valine	34	TRUE	0.0850404	-1.41901	-0.0999401	-0.623074	1.63372	-0.0176664	0.0622174	0.94147	0.480456	0.827059	0.507797	0.411222	0.104844	0.0159767	0.805237
43	HDL	sphingomyelin (d17:1/16:0, d18:1/15:0, d16:1/17:0)*	30	TRUE	2.60974	0.282972	-0.0022829	0.305825	-0.575559	-0.0105132	-0.0249276	0.0127339	0.699055	0.995144	0.468675	0.416934	0.448386	0.20366	0.805237
407	Tot-cholesterol	isobutyrylcarnitine (C4)	30	TRUE	9.79063	0.817415	-0.483811	-0.46803	-0.881457	-0.057667	-0.0259667	2.51653e-06	0.541744	0.55305	0.168821	0.423216	0.0760996	0.525548	0.80552
172	Glucose	palmitoyl sphingomyelin (d18:1/16:0)	37	TRUE	3.50962	2.00571	-0.202671	0.342301	-1.47758	-0.0106231	0.0673966	0.152885	0.293302	0.736797	0.777766	0.435988	0.691092	0.0774467	0.805661
99	HDL	isobutyrylglycine	30	TRUE	2.96348	0.0967714	-0.00560107	0.00959274	-0.423807	-0.0105378	-0.0279784	0.00245336	0.850963	0.988118	0.963541	0.435897	0.469943	0.154984	0.805661
25	Triglycerides	phosphatidylcholine (16:0/22:5n3, 18:1/20:4)*	34	TRUE	-0.664008	-0.383524	-0.353141	0.680495	0.643865	-0.0182104	0.0424482	0.432141	0.635477	0.395909	0.0508111	0.435529	0.0483996	0.0654658	0.805661
276	Tot-cholesterol	fumarate	30	TRUE	10.5388	1.45919	-0.171005	0.0822171	-1.82929	-0.0726733	-0.0407409	6.40529e-07	0.512043	0.839062	0.908283	0.434183	0.0190927	0.347075	0.805661
238	LDL	1-stearoyl-2-linoleoyl-GPE (18:0/18:2)*	30	TRUE	6.17037	0.57623	-0.176365	0.00662908	-0.661749	-0.0356994	-0.0374086	0.00581482	0.554756	0.808442	0.983035	0.432678	0.246483	0.309458	0.805661
454	Triglycerides	1-palmitoyl-2-docosahexaenoyl-GPC (16:0/22:6)	34	TRUE	-0.133379	-0.129904	-0.159834	-0.132469	0.323429	-0.0195174	0.0555552	0.893396	0.799747	0.73966	0.602379	0.429886	0.0795383	0.0366571	0.805661
508	LDL	stearoyl sphingomyelin (d18:1/18:0)	30	TRUE	3.47099	-1.45152	-0.194023	1.59017	1.27043	-0.00223501	-0.0710965	0.085683	0.373022	0.76671	0.0504357	0.428829	0.93325	0.0481123	0.805661
50	Glucose	1-stearoyl-2-docosapentaenoyl-GPC (18:0/22:5n3)*	37	TRUE	3.98725	1.47102	-0.253438	0.108309	-0.878371	-0.0140483	0.0653048	0.045826	0.227375	0.677325	0.782672	0.426901	0.613245	0.0840563	0.805661
58	Triglycerides	citrate	34	TRUE	-0.716154	0.894191	-0.0415003	0.39196	-0.654544	-0.0224029	0.0636167	0.417751	0.326243	0.928912	0.269017	0.433825	0.0466013	0.00894519	0.805661
522	Glucose	1-oleoyl-2-dihomo-linolenoyl-GPC (18:1/20:3)*	37	TRUE	3.92458	-0.150085	-0.267783	0.0189976	0.79847	-0.00734471	0.0561595	0.0309835	0.878798	0.651256	0.943014	0.4402	0.776072	0.135003	0.810819
381	Glucose	1-stearoyl-2-linoleoyl-GPI (18:0/18:2)	37	TRUE	3.57315	1.66722	-0.287183	0.301449	-1.08016	-0.00631019	0.0574951	0.0454125	0.285854	0.625704	0.517196	0.442028	0.804975	0.122649	0.81157
258	Glucose	N-acetylisoleucine	37	TRUE	3.63772	-0.23389	-0.24597	-0.161866	0.81341	-0.00441698	0.0656035	0.0417222	0.829605	0.67994	0.69876	0.44704	0.865875	0.0855461	0.81814
174	HDL	1-myristoyl-2-palmitoyl-GPC (14:0/16:0)	30	TRUE	1.83469	0.0443764	0.0787954	0.573524	-0.308116	0.00415543	-0.0387143	0.0286705	0.904353	0.80128	0.000851183	0.459619	0.728055	0.0163963	0.827889
326	HDL	1-stearoyl-2-docosahexaenoyl-GPC (18:0/22:6)	30	TRUE	3.01763	0.0143324	0.0148487	0.01183	-0.243615	-0.0137362	-0.0228301	0.00447664	0.972725	0.968566	0.956513	0.456752	0.334655	0.268205	0.827889
506	Glucose	sphingomyelin (d18:2/14:0, d18:1/14:1)*	37	TRUE	3.91485	1.19309	-0.184082	0.329833	-0.728953	-0.0130793	0.0604052	0.0244322	0.197999	0.762464	0.69498	0.461066	0.609422	0.153377	0.827889
136	Glucose	sphingomyelin (d18:1/14:0, d16:1/16:0)*	37	TRUE	3.8376	1.33041	-0.255207	0.0306037	-0.818645	-0.0114269	0.068227	0.0399387	0.230393	0.667682	0.967979	0.459531	0.650175	0.0756617	0.827889
316	Glucose	1-oleoyl-2-docosahexaenoyl-GPC (18:1/22:6)*	37	TRUE	2.96776	1.47795	-0.15007	0.599806	-0.902173	-0.0145834	0.0860758	0.134801	0.281439	0.801131	0.324304	0.454353	0.574392	0.0624713	0.827889
246	HDL	1-palmitoyl-2-arachidonoyl-GPC (16:0/20:4n6)	30	TRUE	2.5419	0.191717	0.00831464	0.47691	-0.419345	-0.00684774	-0.0393855	0.00694666	0.751285	0.981786	0.135382	0.4555	0.616123	0.0541928	0.827889
117	Glucose	behenoyl sphingomyelin (d18:1/22:0)*	37	TRUE	2.88585	1.79548	-0.125594	0.950401	-1.29058	-0.00710075	0.0605675	0.147266	0.295118	0.831619	0.212677	0.46569	0.795637	0.112387	0.831074
566	LDL	glucose	30	TRUE	7.33432	1.60107	-0.128565	-1.02077	-1.35142	-0.0479138	-0.0142803	0.000120314	0.456899	0.853145	0.236759	0.466157	0.0674238	0.706389	0.831074
70	Triglycerides	1,2-dipalmitoyl-GPC (16:0/16:0)	34	TRUE	-0.531517	-0.570678	-0.0948794	0.0415247	0.803876	-0.0169982	0.0578506	0.581997	0.615756	0.841272	0.903301	0.467284	0.135631	0.0248412	0.831074
192	Triglycerides	4-methyl-2-oxopentanoate	34	TRUE	0.135503	-0.244842	-0.05125	0.201497	0.524707	-0.0295947	0.0529749	0.898338	0.735559	0.911573	0.331068	0.468661	0.0288615	0.0400713	0.831074
256	Triglycerides	sphingosine 1-phosphate	34	TRUE	-0.826538	-0.353222	-0.102435	-0.02144	0.634975	-0.0139931	0.0645144	0.45517	0.681706	0.828261	0.956336	0.474345	0.344075	0.0146963	0.83596
95	Tot-cholesterol	1-oleoyl-2-docosahexaenoyl-GPC (18:1/22:6)*	30	TRUE	8.73427	0.635005	0.0475671	1.04377	-0.938212	-0.0699177	-0.0169776	0.000146143	0.675995	0.953995	0.131295	0.473489	0.0237388	0.7286	0.83596
5	Tot-cholesterol	sphingomyelin (d18:1/24:1, d18:2/24:0)*	30	TRUE	7.24755	0.751342	0.0385843	1.72468	-1.01935	-0.0413666	-0.0512172	0.00580685	0.616871	0.961553	0.0681505	0.486915	0.198184	0.219541	0.837194
150	Tot-cholesterol	1-palmitoyl-2-stearoyl-GPC (16:0/18:0)	30	TRUE	6.60039	-1.05667	-0.267334	1.84825	0.819587	-0.0316692	-0.050753	0.00137602	0.349841	0.683625	0.0052208	0.47864	0.210927	0.14215	0.837194
366	Triglycerides	tricosanoyl sphingomyelin (d18:1/23:0)*	25	TRUE	-1.50408	-0.808552	-0.0572633	0.453149	0.839822	-0.00495615	0.053445	0.322115	0.525387	0.908846	0.454624	0.479828	0.78979	0.216451	0.837194
44	HDL	1-stearoyl-2-linoleoyl-GPC (18:0/18:2)*	30	TRUE	2.10848	0.809066	0.127348	0.660909	-1.18042	-0.0070059	-0.0266712	0.0389522	0.602531	0.728753	0.0926674	0.482964	0.609835	0.169479	0.837194
340	Glucose	1-palmitoyl-2-arachidonoyl-GPC (16:0/20:4n6)	37	TRUE	3.53328	-0.259925	-0.311879	0.0505346	0.760308	-0.000419079	0.053222	0.054644	0.830147	0.598103	0.925736	0.483464	0.987631	0.183985	0.837194
105	HDL	3-methyl-2-oxobutyrate	30	TRUE	2.77217	0.0675368	0.0506502	0.380111	-0.196252	-0.0112433	-0.0426431	0.00100948	0.894877	0.881388	0.0183011	0.484266	0.357683	0.0176399	0.837194
159	HDL	N-acetylisoleucine	30	TRUE	2.97661	0.104992	-0.0278208	0.101332	-0.423305	-0.0111343	-0.0300868	0.00190005	0.85594	0.941167	0.673095	0.484723	0.478688	0.1228	0.837194
0	Glucose	1-stearoyl-2-arachidonoyl-GPE (18:0/20:4)	37	TRUE	2.0054	-0.10739	-0.40268	0.585039	0.4053	0.0139188	0.052816	0.244656	0.900866	0.448251	0.0255067	0.486548	0.559735	0.113344	0.837194
22	Glucose	1-margaroyl-2-linoleoyl-GPC (17:0/18:2)*	37	TRUE	2.97762	1.84757	0.020237	1.17299	-1.43019	-0.0192658	0.0791559	0.0887661	0.372196	0.972547	0.071862	0.488241	0.460843	0.0537513	0.837194
466	Glucose	1-palmitoyl-2-oleoyl-GPE (16:0/18:1)	37	TRUE	3.19125	0.148491	-0.392728	0.18488	0.248642	0.00186218	0.054535	0.0748197	0.810853	0.498847	0.324433	0.494481	0.941658	0.129726	0.845356
39	HDL	sphingomyelin (d18:1/20:1, d18:2/20:0)*	30	TRUE	3.26656	0.396854	-0.014697	-0.243192	-0.669397	-0.0157575	-0.0188226	0.00191652	0.680734	0.969206	0.663477	0.498184	0.279084	0.362881	0.847369
259	Triglycerides	pyruvate	34	TRUE	-0.644306	0.412322	0.0375385	0.161198	-0.122128	-0.0246622	0.0701567	0.46327	0.239045	0.928454	0.0127591	0.499195	0.0173534	0.00244626	0.847369
183	Glucose	palmitoyl-linoleoyl-glycerol (16:0/18:2) [1]*	35	TRUE	3.4272	-0.0147753	-0.235203	0.346936	0.45708	-0.00653785	0.0625108	0.0859906	0.984938	0.686474	0.345655	0.500111	0.812366	0.10006	0.847369
484	Tot-cholesterol	arabonate/xylonate	30	TRUE	10.3421	-1.15813	-0.163828	-0.382289	0.853406	-0.0644419	-0.0367425	5.841e-07	0.434037	0.843656	0.420456	0.501619	0.0315765	0.405973	0.847409
282	HDL	sphingomyelin (d18:1/20:0, d16:1/22:0)*	30	TRUE	3.08649	0.316884	0.0128927	-0.0471989	-0.62449	-0.014412	-0.0216651	0.00427796	0.731433	0.97277	0.91594	0.511392	0.335167	0.303185	0.848852
229	LDL	2-methylbutyrylcarnitine (C5)	30	TRUE	6.70172	0.288282	-0.396434	-0.432103	-0.335891	-0.0378418	-0.0328526	6.47935e-05	0.680139	0.562372	0.186035	0.510398	0.112219	0.328029	0.848852
51	Glucose	1-stearoyl-2-arachidonoyl-GPI (18:0/20:4)	37	TRUE	3.02988	-0.971201	-0.441253	0.578174	0.993898	0.000353208	0.0497991	0.0895422	0.630895	0.448109	0.244079	0.511392	0.989019	0.176525	0.848852
509	LDL	sphingomyelin (d18:1/20:0, d16:1/22:0)*	30	TRUE	3.83359	-1.14573	-0.213484	1.61077	1.0692	-0.0108328	-0.0649502	0.0361867	0.463801	0.738623	0.0334605	0.506859	0.668901	0.0684151	0.848852
505	Tot-cholesterol	palmitoyl sphingomyelin (d18:1/16:0)	30	TRUE	6.15319	0.894115	0.130682	2.64371	-1.24409	-0.0401414	-0.0452952	0.0242865	0.634081	0.867117	0.0326481	0.505106	0.180948	0.255599	0.848852
337	Glucose	1-palmitoyl-2-linoleoyl-GPI (16:0/18:2)	35	TRUE	4.48343	1.11431	-0.191129	0.0456299	-0.409863	-0.0190015	0.0617571	0.0268776	0.184532	0.756162	0.897156	0.509394	0.5181	0.140354	0.848852
451	HDL	1-stearoyl-2-oleoyl-GPE (18:0/18:1)	28	TRUE	2.28427	-0.129865	-0.0129437	0.115052	-0.131454	-0.00341742	-0.0237673	0.0252848	0.670602	0.970557	0.396283	0.513611	0.807124	0.185424	0.850064
480	LDL	1-palmitoyl-2-arachidonoyl-GPC (16:0/20:4n6)	30	TRUE	6.4874	-0.915875	-0.216595	-0.45807	0.728398	-0.0347622	-0.0329054	0.000580732	0.449571	0.766473	0.473848	0.517409	0.203733	0.421815	0.852032
537	Glucose	2-methylcitrate/homocitrate	27	TRUE	5.52449	2.26573	0.0766499	-0.744364	-1.65505	-0.0286475	0.0651989	0.0146064	0.350495	0.900213	0.212928	0.517785	0.3729	0.131442	0.852032
511	Triglycerides	1-oleoyl-2-docosahexaenoyl-GPC (18:1/22:6)*	34	TRUE	-0.157968	-0.176821	-0.144565	-0.103792	0.380164	-0.0193094	0.0542842	0.879837	0.801697	0.764633	0.743512	0.5351	0.0942732	0.0547694	0.853469
521	LDL	alpha-ketoglutarate	30	TRUE	6.65475	0.861447	-0.134504	-0.123695	-0.404819	-0.0469128	-0.0220403	0.000339083	0.55962	0.853181	0.590998	0.534767	0.112366	0.593436	0.853469
498	Triglycerides	palmitoyl-linoleoyl-glycerol (16:0/18:2) [2]*	33	TRUE	-1.0283	0.313565	0.00588821	0.252775	-0.11086	-0.00954726	0.0510312	0.218003	0.307987	0.98865	0.0988673	0.534519	0.387209	0.0213026	0.853469
502	Glucose	phosphatidylcholine (18:0/20:5, 16:0/22:5n6)*	37	TRUE	3.77184	0.936275	-0.263056	0.131077	-0.303125	-0.0111925	0.0657774	0.0423552	0.190881	0.658297	0.719723	0.533716	0.66838	0.088727	0.853469
308	Glucose	palmitoyl-linoleoyl-glycerol (16:0/18:2) [2]*	35	TRUE	2.83876	0.122701	-0.339023	0.267646	0.274565	0.00626355	0.0570115	0.156425	0.840233	0.560816	0.36804	0.532999	0.818015	0.126078	0.853469
129	Glucose	sphingomyelin (d18:1/20:1, d18:2/20:0)*	37	TRUE	3.05232	1.64378	-0.137041	1.06063	-1.23435	-0.0103992	0.0613988	0.111894	0.381717	0.818257	0.297994	0.530096	0.686548	0.125414	0.853469
370	LDL	trimethylamine N-oxide	30	TRUE	5.98568	-1.08603	-0.299101	-0.0826646	1.14886	-0.0245107	-0.0523093	0.00117007	0.47061	0.692889	0.694954	0.526363	0.419813	0.215598	0.853469
299	LDL	ethylmalonate	30	TRUE	6.02208	0.29815	-0.231194	-0.000253979	-0.217965	-0.0262794	-0.0531994	0.00095948	0.681409	0.755513	0.998877	0.523721	0.350667	0.21361	0.853469
457	HDL	leucine	30	TRUE	2.65568	0.387553	-0.00934928	0.39317	-0.619327	-0.0123645	-0.027718	0.0108776	0.713884	0.980219	0.554526	0.52347	0.38947	0.147144	0.853469
147	HDL	glucose	30	TRUE	3.49279	0.525322	0.0137656	-0.520205	-0.616275	-0.0155614	-0.0164164	0.00041819	0.638143	0.96954	0.245366	0.521993	0.252467	0.404076	0.853469
152	Tot-cholesterol	1-stearoyl-2-oleoyl-GPE (18:0/18:1)	28	TRUE	11.0141	0.12483	-0.236468	-0.0429864	-0.305708	-0.0744263	-0.0476156	7.65659e-06	0.865324	0.779686	0.895397	0.528567	0.0274054	0.271085	0.853469
526	Tot-cholesterol	stearoyl sphingomyelin (d18:1/18:0)	30	TRUE	7.67135	-1.46075	-0.213723	1.68541	1.16301	-0.034397	-0.0800322	0.00119761	0.444525	0.780464	0.0770101	0.536763	0.271622	0.0577758	0.853738
423	HDL	phosphatidylcholine (18:0/20:5, 16:0/22:5n6)*	30	TRUE	2.98632	-0.0654515	0.00852089	0.0163415	-0.148434	-0.0127969	-0.0240145	0.00320153	0.854907	0.981911	0.930346	0.541119	0.37079	0.225059	0.857411
9	Triglycerides	sphingomyelin (d18:1/18:1, d18:2/18:0)	34	TRUE	-0.329416	-0.399613	-0.0584133	-0.11043	0.634816	-0.0187229	0.059549	0.752224	0.707218	0.909821	0.825598	0.542076	0.0988541	0.0275581	0.857411
239	Triglycerides	1,5-anhydroglucitol (1,5-AG)	34	TRUE	0.959075	0.471021	-0.146336	-0.329467	-0.332543	-0.0293133	0.0437224	0.443794	0.416575	0.745532	0.306167	0.560698	0.0210713	0.0934026	0.867638
478	Glucose	fumarate	37	TRUE	2.88861	-0.551463	-0.391292	1.01207	1.06679	-0.00807289	0.0613964	0.0902765	0.758928	0.481575	0.0861958	0.560183	0.750058	0.0795575	0.867638
154	LDL	sphingomyelin (d18:2/24:1, d18:1/24:2)*	30	TRUE	5.19306	-0.778232	-0.159964	0.423804	0.675824	-0.0209906	-0.0499265	0.0216269	0.503503	0.825267	0.567174	0.560176	0.46259	0.18159	0.867638
481	Glucose	choline phosphate	35	TRUE	3.68396	1.22279	-0.261953	0.106214	-0.61795	-0.0108512	0.0694918	0.0816579	0.323993	0.668776	0.78489	0.557973	0.691671	0.0919969	0.867638
568	HDL	valine	30	TRUE	2.67024	0.642559	0.0362294	0.467027	-0.866305	-0.0131043	-0.0294738	0.011832	0.681217	0.925599	0.6056	0.556007	0.386051	0.128298	0.867638
351	Triglycerides	1-stearoyl-2-linoleoyl-GPC (18:0/18:2)*	34	TRUE	-0.850707	-0.476949	0.142484	0.984649	0.935621	-0.0143187	0.0311067	0.353928	0.736712	0.717922	0.0164799	0.555042	0.120509	0.206472	0.867638
55	HDL	sphingomyelin (d18:1/21:0, d17:1/22:0, d16:1/23:0)*	30	TRUE	3.15861	0.105163	0.019274	-0.135843	-0.37752	-0.0143675	-0.0215652	0.00122827	0.867243	0.958706	0.725701	0.550697	0.316031	0.279534	0.867638
34	Triglycerides	1-pentadecanoyl-2-linoleoyl-GPC (15:0/18:2)*	34	TRUE	-0.238592	-0.443164	0.0886286	0.409597	0.689674	-0.0206732	0.0429938	0.808638	0.69785	0.850627	0.215501	0.557242	0.049387	0.118855	0.867638
450	Triglycerides	mannitol/sorbitol	34	TRUE	-0.375221	0.0169569	-0.0776891	-0.0181479	0.0948995	-0.0220738	0.0660924	0.682439	0.968789	0.868118	0.559725	0.57767	0.0689288	0.00719298	0.872686
24	Glucose	glycerophosphorylcholine (GPC)	37	TRUE	4.63244	1.2459	-0.115773	-0.534869	-0.78226	-0.0127879	0.0625154	0.0160523	0.368619	0.845926	0.366637	0.5823	0.603918	0.102531	0.872686
336	HDL	1-palmitoyl-2-oleoyl-GPI (16:0/18:1)*	29	TRUE	2.89782	-0.0557089	-0.0454754	0.070621	-0.207758	-0.0096302	-0.0291441	0.00785492	0.906847	0.907191	0.72503	0.581963	0.524342	0.13599	0.872686
404	HDL	3-hydroxy-2-ethylpropionate	30	TRUE	2.73149	0.184779	0.140364	0.364886	-0.394709	-0.0117823	-0.0318138	0.00249021	0.831925	0.704434	0.0858628	0.579278	0.38458	0.0916244	0.872686
378	LDL	sphingosine 1-phosphate	30	TRUE	8.02808	-1.07751	-0.17646	-1.50471	0.93587	-0.0498561	-0.02195	5.42384e-06	0.458966	0.786013	0.00939384	0.577934	0.0464897	0.537317	0.872686
548	Tot-cholesterol	3-methyl-2-oxobutyrate	30	TRUE	10.2247	0.363917	-0.0805884	0.781654	-0.351137	-0.0716924	-0.077127	6.7514e-08	0.751308	0.915844	0.0308014	0.5775	0.0090404	0.0560766	0.872686
232	Triglycerides	1-margaroyl-2-linoleoyl-GPC (17:0/18:2)*	34	TRUE	-0.313331	-0.386832	0.0603414	0.457897	0.601831	-0.0199628	0.0425495	0.764275	0.710114	0.898444	0.27081	0.568154	0.0576127	0.128642	0.872686
66	LDL	choline phosphate	29	TRUE	5.51567	-0.667817	-0.199486	0.0681931	0.533017	-0.0260596	-0.040043	0.0081542	0.54945	0.782295	0.862416	0.575373	0.333557	0.298864	0.872686
21	LDL	1,2-dipalmitoyl-GPC (16:0/16:0)	30	TRUE	3.16543	-0.951243	0.127185	1.78788	0.843664	-0.00784832	-0.0532654	0.0922304	0.517414	0.841856	0.0108475	0.57408	0.743179	0.098444	0.872686
368	Glucose	1-palmitoyl-2-linoleoyl-GPC (16:0/18:2)	37	TRUE	3.41008	1.795	-0.165094	0.496395	-1.37234	-0.00835199	0.0605552	0.0825455	0.407813	0.784469	0.517121	0.568859	0.747175	0.109028	0.872686
420	Glucose	glucose	37	TRUE	1.61465	-0.701356	-0.0568358	3.27882	0.724295	-0.00213299	0.00908848	0.210691	0.623528	0.885901	1.37094e-07	0.567273	0.899056	0.73272	0.872686
515	Triglycerides	sphinganine-1-phosphate	29	TRUE	-0.539424	-0.867102	-0.146025	-0.0360658	1.30879	-0.0131787	0.0545497	0.610316	0.678541	0.764137	0.930196	0.57732	0.330233	0.0534864	0.872686
494	HDL	sphingomyelin (d18:1/17:0, d17:1/18:0, d19:1/16:0)	30	TRUE	3.28958	0.139215	-0.00489478	-0.183715	-0.3552	-0.0145097	-0.0241558	0.00213509	0.845875	0.989533	0.603093	0.589894	0.306582	0.2224	0.879601
180	HDL	1-myristoyl-2-linoleoyl-GPC (14:0/18:2)*	30	TRUE	2.04491	-0.0057591	0.0949883	0.620427	-0.288279	0.00328801	-0.0444126	0.020719	0.990041	0.776256	0.00704993	0.590873	0.799275	0.0136667	0.879601
360	Tot-cholesterol	1-stearoyl-2-arachidonoyl-GPE (18:0/20:4)	30	TRUE	11.5797	0.312192	-0.209004	-0.273472	-0.391119	-0.0823544	-0.0419981	3.64043e-06	0.762658	0.798142	0.496745	0.591535	0.0152708	0.312157	0.879601
71	LDL	lactate	30	TRUE	7.19721	0.592904	-0.155221	-0.547901	-0.779447	-0.0465343	-0.0309863	0.000340451	0.677709	0.827557	0.372902	0.597189	0.0866312	0.421547	0.885274
512	HDL	arabitol/xylitol	30	TRUE	2.79098	-0.884167	0.0172048	0.258324	0.40889	-0.0101262	-0.0330947	0.00231283	0.405138	0.962557	0.309089	0.599893	0.441269	0.089929	0.885274
8	Triglycerides	1-stearoyl-2-oleoyl-GPE (18:0/18:1)	31	TRUE	-0.935506	0.366871	-0.115897	0.313259	-0.117697	-0.0115778	0.051339	0.20255	0.219537	0.76161	0.00744691	0.600002	0.207127	0.0160077	0.885274
430	Triglycerides	succinylcarnitine (C4-DC)	34	TRUE	-1.55931	0.5686	0.311439	0.73548	-0.274281	-0.0146193	0.0607997	0.0357872	0.363769	0.400222	0.000704087	0.601864	0.0763054	0.00142038	0.885732
375	HDL	1-stearoyl-2-oleoyl-GPC (18:0/18:1)	30	TRUE	1.95828	-0.760671	-0.0407457	0.304003	0.648942	0.00103407	-0.0280944	0.0553434	0.463286	0.908364	0.075074	0.603549	0.94023	0.12438	0.88593
486	LDL	ribonate	30	TRUE	6.0933	0.455263	-0.283832	-0.18118	-0.417488	-0.0243663	-0.0537566	0.000818892	0.668196	0.698388	0.59842	0.606575	0.393192	0.18747	0.888088
165	Triglycerides	sphingomyelin (d18:1/14:0, d16:1/16:0)*	34	TRUE	-0.769735	0.546137	-0.26388	0.589959	-0.326375	-0.0180918	0.0504277	0.420908	0.398049	0.568102	0.215184	0.611674	0.0842532	0.0489743	0.888941
149	Tot-cholesterol	sphingomyelin (d18:1/20:0, d16:1/22:0)*	30	TRUE	7.94456	-1.14343	-0.232664	1.79269	0.94776	-0.0428326	-0.0739976	0.000193546	0.530179	0.754867	0.042154	0.613458	0.146553	0.0746672	0.888941
539	LDL	1-palmitoyl-2-arachidonoyl-GPE (16:0/20:4)*	30	TRUE	7.3636	0.454823	-0.212356	-0.305461	-0.48759	-0.0465309	-0.0431217	0.00083528	0.708155	0.76438	0.335639	0.61384	0.132728	0.239581	0.888941
257	Glucose	mannitol/sorbitol	37	TRUE	5.70226	0.155691	0.0268624	0.0964448	0.0322335	-0.0328466	0.0430415	0.000335933	0.679017	0.958119	0.00878269	0.614343	0.152284	0.177432	0.888941
139	Glucose	1-stearoyl-2-linoleoyl-GPC (18:0/18:2)*	37	TRUE	2.92822	2.02603	-0.105691	1.05942	-1.58992	-0.0097761	0.0627779	0.124635	0.500414	0.857172	0.148288	0.61817	0.71431	0.0913297	0.888941
432	Tot-cholesterol	palmitoyl dihydrosphingomyelin (d18:0/16:0)*	30	TRUE	8.24569	0.213911	-0.154421	1.47847	-0.535669	-0.0520757	-0.0515704	4.16959e-05	0.842772	0.834065	0.0129907	0.618206	0.0633886	0.189793	0.888941
323	HDL	1-palmitoyl-2-arachidonoyl-GPI (16:0/20:4)*	29	TRUE	2.5998	-0.075939	-0.0287521	0.16019	-0.192183	-0.00532146	-0.0319742	0.0172184	0.876703	0.939163	0.387966	0.620821	0.734455	0.109466	0.888941
301	HDL	1-palmitoyl-2-arachidonoyl-GPE (16:0/20:4)*	30	TRUE	2.61441	-0.581669	-0.00130212	0.08062	0.251233	-0.00679641	-0.026856	0.0247036	0.364673	0.997223	0.630392	0.622497	0.67755	0.16548	0.888941
565	Triglycerides	N-palmitoyl-sphingosine (d18:1/16:0)	34	TRUE	-1.40867	-0.299183	-0.0938572	0.803209	0.572014	-0.0122065	0.0508362	0.0705512	0.801531	0.792662	0.00178532	0.62253	0.149352	0.0140988	0.888941
157	HDL	mannitol/sorbitol	30	TRUE	2.96656	-0.193182	-0.00496289	0.00170064	-0.0187571	-0.0102425	-0.0285919	0.00446701	0.417336	0.98967	0.937238	0.624646	0.498559	0.139941	0.888941
196	Triglycerides	glycerate	34	TRUE	0.263511	-0.302145	-0.263784	-0.680873	0.545508	-0.0286223	0.0773521	0.775061	0.764318	0.555546	0.0335286	0.62622	0.0103403	0.00110173	0.888941
297	Glucose	methylsuccinate	37	TRUE	3.70876	0.879376	-0.30369	0.00374521	-0.24762	-0.000892899	0.0498219	0.03827	0.242029	0.617323	0.989352	0.626677	0.975043	0.227378	0.888941
519	Tot-cholesterol	palmitoyl-linoleoyl-glycerol (16:0/18:2) [1]*	28	TRUE	10.3563	0.115908	-0.187382	0.114701	-0.371727	-0.0682928	-0.0446031	7.23526e-05	0.89746	0.831018	0.790824	0.627396	0.0614056	0.333783	0.888941
281	Triglycerides	N-acetylvaline	34	TRUE	-0.376762	-0.141465	-0.147139	-0.18845	0.33972	-0.0200739	0.0674091	0.700385	0.871765	0.759228	0.595177	0.642894	0.0801419	0.00864793	0.893169
492	Triglycerides	methylsuccinate	34	TRUE	-0.548252	0.522985	-0.158697	-0.111215	-0.167243	-0.0123861	0.0545447	0.538323	0.318953	0.74262	0.603658	0.641352	0.312976	0.0579769	0.893169
475	LDL	1-palmitoyl-2-linoleoyl-GPI (16:0/18:2)	29	TRUE	5.22168	-0.560697	-0.160655	0.18813	0.309986	-0.0194501	-0.0471425	0.00977287	0.476365	0.821819	0.71877	0.641313	0.494858	0.208316	0.893169
294	HDL	phosphatidylcholine (16:0/22:5n3, 18:1/20:4)*	30	TRUE	2.13387	0.0778851	-0.0439216	0.551041	-0.339793	-0.00500628	-0.0307568	0.0351068	0.919138	0.903151	0.103306	0.641189	0.71386	0.103922	0.893169
92	LDL	oleoyl-linoleoyl-glycerol (18:1/18:2) [2]	30	TRUE	6.60651	0.221522	-0.194496	-0.126549	-0.195944	-0.0411952	-0.0353755	0.00065107	0.731311	0.787077	0.682578	0.636091	0.117801	0.33668	0.893169
517	HDL	1-stearoyl-2-docosapentaenoyl-GPC (18:0/22:5n3)*	30	TRUE	2.10256	0.0221699	-0.067637	0.294004	-0.259027	-0.00299199	-0.0256858	0.050304	0.969589	0.853903	0.150068	0.633918	0.8356	0.182341	0.893169
449	Tot-cholesterol	sphingomyelin (d18:2/23:0, d18:1/23:1, d17:1/24:1)*	30	TRUE	8.97729	0.237473	-0.0728117	1.15878	-0.64808	-0.0555157	-0.0576455	0.000285626	0.86135	0.930633	0.307847	0.633902	0.079385	0.183273	0.893169
388	LDL	oleoyl-linoleoyl-glycerol (18:1/18:2) [1]	30	TRUE	6.30869	0.231992	-0.179523	-0.0319755	-0.225386	-0.0375464	-0.0366913	0.00138267	0.756393	0.806916	0.92386	0.640391	0.160232	0.325891	0.893169
33	Triglycerides	1-palmitoyl-2-arachidonoyl-GPE (16:0/20:4)*	34	TRUE	-1.16719	0.352327	-0.152051	0.413332	-0.157546	-0.0169108	0.0668231	0.11979	0.422532	0.691645	0.0116759	0.644722	0.0593068	0.00083133	0.893535
496	LDL	beta-hydroxyisovalerate	30	TRUE	6.54217	0.424467	-0.452577	-0.900097	-0.374399	-0.0357601	-0.0105131	4.58309e-05	0.6995	0.494627	0.0455936	0.646354	0.133515	0.758606	0.893628
249	HDL	tiglylcarnitine (C5:1-DC)	30	TRUE	2.69958	-0.0345037	0.00385889	0.118566	-0.208625	-0.00831888	-0.0281352	0.0067728	0.951282	0.991848	0.518239	0.651612	0.541778	0.139693	0.898721
118	Triglycerides	choline	34	TRUE	-0.505902	-0.439301	-0.0984102	0.0939831	0.681807	-0.017966	0.0570931	0.679227	0.777551	0.832925	0.903284	0.655099	0.121295	0.0398674	0.899186
309	Tot-cholesterol	sphingomyelin (d18:1/14:0, d16:1/16:0)*	30	TRUE	8.1239	0.02907	-0.663388	2.11597	-0.465362	-0.0484169	-0.0755368	9.80714e-06	0.977981	0.337814	0.00407763	0.653566	0.0550457	0.0324816	0.899186
389	Glucose	phosphatidylcholine (16:0/22:5n3, 18:1/20:4)*	37	TRUE	4.05596	1.25244	-0.236901	0.0159354	-0.683835	-0.0127266	0.0637573	0.040139	0.448488	0.69206	0.981386	0.658876	0.636329	0.0966441	0.902202
158	LDL	1-stearoyl-2-arachidonoyl-GPE (18:0/20:4)	30	TRUE	7.70519	0.281489	-0.191295	-0.400446	-0.270667	-0.0547486	-0.0324498	0.000307674	0.749812	0.783978	0.243829	0.663635	0.0589336	0.360425	0.904995
181	Tot-cholesterol	1-palmitoyl-2-arachidonoyl-GPE (16:0/20:4)*	30	TRUE	10.7795	0.346704	-0.227578	-0.0779553	-0.495357	-0.0687501	-0.0523278	3.42741e-05	0.808988	0.785531	0.835106	0.664086	0.0598639	0.226676	0.904995
318	Tot-cholesterol	ethylmalonate	30	TRUE	10.4351	0.0733575	-0.217756	0.0279646	-0.169374	-0.0623666	-0.0590927	6.98829e-07	0.930204	0.799256	0.893111	0.667459	0.0547814	0.230951	0.907427
490	HDL	1,5-anhydroglucitol (1,5-AG)	30	TRUE	2.00693	-0.295706	-0.0378903	0.57384	0.332161	-0.00273313	-0.0331427	0.0446422	0.650687	0.910493	0.0508079	0.671194	0.843459	0.0690602	0.909107
306	Triglycerides	malate	33	TRUE	-0.675146	-0.145042	-0.110337	-0.0553819	0.324457	-0.0177243	0.0685961	0.547571	0.871226	0.82057	0.841358	0.67188	0.172409	0.0142514	0.909107
64	LDL	fumarate	30	TRUE	6.50768	0.65738	-0.244044	-0.42634	-0.849749	-0.0342078	-0.0380889	0.000405771	0.734026	0.738833	0.491971	0.676034	0.20444	0.311927	0.912566
305	HDL	1-pentadecanoyl-2-linoleoyl-GPC (15:0/18:2)*	30	TRUE	2.53395	-0.056265	0.143894	0.49703	-0.268784	-0.00970856	-0.0300124	0.00574671	0.929997	0.697942	0.0930878	0.678313	0.455269	0.101207	0.913482
41	Triglycerides	sphingomyelin (d18:2/16:0, d18:1/16:1)*	34	TRUE	-0.853965	0.535956	-0.115389	0.380046	-0.313667	-0.0169757	0.0585227	0.393379	0.490822	0.803152	0.446189	0.685036	0.120683	0.0286864	0.913915
292	HDL	1-palmitoyl-2-linoleoyl-GPE (16:0/18:2)	30	TRUE	2.18318	-0.452104	0.0183993	0.167174	0.19243	-0.00125114	-0.0268596	0.0519238	0.373999	0.959758	0.246068	0.684812	0.935734	0.146792	0.913915
211	Triglycerides	glycerophosphoethanolamine	34	TRUE	-0.240315	-0.200638	-0.173935	-0.280567	0.409707	-0.0232636	0.0734977	0.783814	0.815705	0.700057	0.165215	0.680394	0.0554798	0.00450524	0.913915
140	HDL	1-palmitoyl-2-oleoyl-GPC (16:0/18:1)	30	TRUE	1.23864	-0.610249	-0.0283137	0.618104	0.5085	0.00904631	-0.0317321	0.227448	0.570588	0.931768	0.00757386	0.684795	0.507808	0.0643047	0.913915
383	HDL	1-palmitoyl-2-oleoyl-GPE (16:0/18:1)	30	TRUE	2.40499	-0.192773	-0.00980644	0.113139	-0.072511	-0.00258754	-0.0303964	0.0194909	0.530743	0.978893	0.271663	0.691943	0.859025	0.105717	0.917567
386	Triglycerides	1-stearoyl-2-docosapentaenoyl-GPC (18:0/22:5n6)*	34	TRUE	-0.652654	0.261814	-0.0619186	0.471594	0.0809026	-0.0144589	0.037011	0.226256	0.278669	0.824086	3.55892e-07	0.692554	0.0284784	0.0199552	0.917567
104	HDL	1-palmitoyl-2-palmitoleoyl-GPC (16:0/16:1)*	30	TRUE	1.72024	-0.34774	0.00667512	0.282737	0.223088	0.00784288	-0.0348535	0.0569123	0.440587	0.983602	0.00411129	0.692796	0.547701	0.036637	0.917567
19	Triglycerides	alpha-ketoglutarate	34	TRUE	-0.657887	0.32269	0.0242617	0.236586	-0.0962512	-0.0216759	0.0622952	0.457499	0.449296	0.952604	0.0175105	0.695308	0.0281705	0.00675613	0.917567
503	Triglycerides	choline phosphate	33	TRUE	-1.32206	0.552351	0.00224354	0.274427	-0.218702	-0.0130196	0.0671481	0.0981367	0.390382	0.99548	0.139411	0.695808	0.177505	0.00220347	0.917567
310	HDL	1-palmitoyl-2-adrenoyl-GPC (16:0/22:4)*	30	TRUE	1.98475	-0.348721	-0.0867433	0.200549	0.145742	0.0024371	-0.0293701	0.0399754	0.348497	0.802702	0.0402997	0.70789	0.856769	0.0939646	0.92104
364	HDL	isoleucine	30	TRUE	2.86411	0.0656845	-0.00706885	0.131554	-0.305018	-0.0110581	-0.0280284	0.00420548	0.94256	0.98513	0.843837	0.706907	0.457701	0.146825	0.92104
191	Tot-cholesterol	sphingomyelin (d18:2/16:0, d18:1/16:1)*	30	TRUE	6.75335	-0.819763	-0.207759	2.62686	0.458084	-0.0246276	-0.0949848	0.000361871	0.489904	0.74447	0.00126122	0.70812	0.325595	0.00534483	0.92104
329	Triglycerides	behenoyl sphingomyelin (d18:1/22:0)*	34	TRUE	-1.10503	0.641956	-0.0857012	0.517201	-0.365934	-0.0156795	0.0579886	0.269155	0.525416	0.850417	0.255069	0.704467	0.15756	0.0254906	0.92104
222	Tot-cholesterol	1,2-dipalmitoyl-GPC (16:0/16:0)	30	TRUE	5.79437	-0.783535	0.307388	2.85941	0.547847	-0.0282069	-0.0657183	0.00123662	0.576271	0.613284	1.95222e-05	0.702073	0.217139	0.0326162	0.92104
458	LDL	1-oleoyl-2-docosahexaenoyl-GPC (18:1/22:6)*	30	TRUE	5.1375	0.259961	-0.0419964	0.596469	-0.445556	-0.0351269	-0.0228593	0.0131054	0.849286	0.954887	0.338183	0.705367	0.207013	0.603831	0.92104
253	Glucose	N-acetylvaline	37	TRUE	3.99052	0.0675297	-0.239962	-0.115584	0.449339	-0.0103586	0.0652933	0.0235746	0.959553	0.687307	0.867572	0.713908	0.703318	0.105284	0.926459
210	Tot-cholesterol	citrate	30	TRUE	10.4256	-0.783334	-0.234687	-0.10111	0.465286	-0.065136	-0.0472357	9.71534e-07	0.609079	0.782192	0.86143	0.71916	0.0415272	0.287193	0.931158
392	Triglycerides	palmitoyl-linoleoyl-glycerol (16:0/18:2) [1]*	34	TRUE	-0.833435	0.29104	-0.0730467	0.212204	-0.0716119	-0.0113883	0.0493296	0.321066	0.381827	0.863302	0.213358	0.722591	0.28625	0.0337314	0.932864
555	Glucose	1-palmitoyl-2-linoleoyl-GPE (16:0/18:2)	37	TRUE	2.82944	0.270593	-0.35872	0.366934	0.339272	0.00165879	0.0616768	0.122367	0.792672	0.529918	0.120295	0.724079	0.948289	0.0856381	0.932864
277	HDL	N-palmitoyl-sphingosine (d18:1/16:0)	30	TRUE	2.99887	0.242482	-0.00314479	-0.020293	-0.510259	-0.011339	-0.0264088	0.0216077	0.870526	0.993406	0.958764	0.726325	0.475042	0.203262	0.932864
251	LDL	choline	30	TRUE	6.8432	-1.55804	-0.233091	-0.647435	1.48049	-0.0343852	-0.0426742	0.00476614	0.711168	0.753008	0.657424	0.73109	0.223947	0.284163	0.932864
233	Triglycerides	glycerophosphorylcholine (GPC)	34	TRUE	-0.449312	-0.0627387	0.125588	-0.279398	0.308154	-0.0183485	0.0694051	0.632521	0.939011	0.808006	0.342256	0.733068	0.090408	0.0111473	0.932864
160	Glucose	tricosanoyl sphingomyelin (d18:1/23:0)*	27	TRUE	1.49714	-0.45001	-0.0972375	0.449694	0.661697	0.0243424	0.0620895	0.523707	0.824506	0.903073	0.633072	0.73322	0.468527	0.232859	0.932864
260	Tot-cholesterol	1-palmitoyl-2-oleoyl-GPE (16:0/18:1)	30	TRUE	10.5035	-0.0538362	-0.205049	0.00664471	-0.141222	-0.0681052	-0.0473086	6.74419e-06	0.938427	0.807163	0.977275	0.733486	0.0391376	0.266584	0.932864
178	Triglycerides	ethylmalonate	34	TRUE	-0.589777	0.416032	-0.133031	-0.043824	-0.0761435	-0.0150493	0.059548	0.506244	0.363102	0.780088	0.697982	0.733548	0.218377	0.0323545	0.932864
193	LDL	citrate	30	TRUE	5.93479	-0.518248	-0.257863	-0.359874	0.368881	-0.0285067	-0.031755	0.00132534	0.696816	0.726477	0.474323	0.742688	0.304297	0.409961	0.934085
215	HDL	palmitoyl-linoleoyl-glycerol (16:0/18:2) [2]*	29	TRUE	3.23018	-0.332638	-0.0364535	-0.101692	0.0732652	-0.0125655	-0.0294841	0.00515666	0.274421	0.924896	0.508674	0.741684	0.423095	0.136548	0.934085
465	LDL	arabonate/xylonate	30	TRUE	6.06278	-0.483203	-0.133766	-0.382915	0.365937	-0.0324041	-0.027973	0.000811206	0.709004	0.853921	0.356194	0.741826	0.216476	0.469455	0.934085
477	Tot-cholesterol	sphingomyelin (d17:1/16:0, d18:1/15:0, d16:1/17:0)*	30	TRUE	7.83593	-0.124602	-0.255009	2.16456	-0.438906	-0.0552086	-0.0506947	6.07119e-05	0.927283	0.715506	0.00596594	0.73999	0.0328154	0.165757	0.934085
167	Tot-cholesterol	1-palmitoyl-2-linoleoyl-GPE (16:0/18:2)	30	TRUE	9.42643	0.127162	-0.179048	0.235379	-0.358969	-0.0540824	-0.048833	0.000246678	0.913032	0.83019	0.475638	0.740854	0.127918	0.249246	0.934085
335	HDL	citrate	30	TRUE	2.93843	-0.506077	-0.00348903	0.0582761	0.18871	-0.00969724	-0.0308053	0.00217388	0.463114	0.992717	0.823202	0.746027	0.500376	0.123205	0.934745
135	Tot-cholesterol	1-oleoyl-2-dihomo-linolenoyl-GPC (18:1/20:3)*	30	TRUE	9.5771	-0.511865	-0.223601	0.338609	0.347723	-0.0563266	-0.0525882	1.06297e-05	0.623055	0.783503	0.258615	0.746486	0.0653674	0.202828	0.934745
103	HDL	1-stearoyl-2-linoleoyl-GPI (18:0/18:2)	30	TRUE	3.00075	0.0601378	-0.0155974	-0.0851288	-0.265493	-0.00923005	-0.0295507	0.00280886	0.948153	0.967128	0.812873	0.748939	0.498108	0.122894	0.935297
417	LDL	palmitoyl dihydrosphingomyelin (d18:0/16:0)*	30	TRUE	4.24708	0.111062	-0.145971	1.23495	-0.30114	-0.0202449	-0.0443044	0.0164695	0.906847	0.821966	0.0183909	0.750203	0.412173	0.200554	0.935297
109	LDL	1-oleoyl-2-dihomo-linolenoyl-GPC (18:1/20:3)*	30	TRUE	6.17425	-0.41259	-0.188087	-0.00415411	0.307587	-0.0341335	-0.0407113	0.0016995	0.661436	0.798365	0.987778	0.751937	0.217084	0.275814	0.935416
176	LDL	1-margaroyl-2-linoleoyl-GPC (17:0/18:2)*	30	TRUE	4.52886	-0.889422	0.115858	1.41851	0.563656	-0.0265252	-0.0452221	0.0076143	0.627069	0.860892	0.0183831	0.754469	0.29703	0.217082	0.936525
59	Triglycerides	1-palmitoyl-2-oleoyl-GPI (16:0/18:1)*	33	TRUE	-1.23769	0.31799	0.021018	0.421049	-0.112449	-0.0123797	0.0591714	0.0956931	0.501859	0.956344	0.0149852	0.757798	0.181781	0.00387098	0.937259
399	Glucose	1-palmitoyl-2-arachidonoyl-GPE (16:0/20:4)*	37	TRUE	2.98239	0.179332	-0.341074	0.314291	0.30481	7.20402e-05	0.060887	0.111188	0.887336	0.557455	0.232767	0.758343	0.997814	0.101774	0.937259
562	Tot-cholesterol	trimethylamine N-oxide	30	TRUE	10.4221	-0.775252	-0.345891	-0.139302	0.588018	-0.0609195	-0.0543342	7.94394e-07	0.65282	0.68995	0.563812	0.776992	0.0798829	0.261234	0.939963
359	Glucose	1-stearoyl-2-docosapentaenoyl-GPC (18:0/22:5n6)*	37	TRUE	4.82084	0.294815	-0.164584	-0.320813	0.166821	-0.0209734	0.069632	0.0140115	0.698459	0.780459	0.213482	0.775523	0.467224	0.0624848	0.939963
20	Triglycerides	1-palmitoyl-2-linoleoyl-GPE (16:0/18:2)	34	TRUE	-1.1652	0.394691	-0.0148441	0.314817	-0.112994	-0.0126605	0.0612558	0.133995	0.372987	0.97037	0.0329021	0.775211	0.185902	0.00352379	0.939963
144	LDL	1-palmitoyl-2-linoleoyl-GPE (16:0/18:2)	30	TRUE	6.21465	0.132743	-0.191405	-0.0130823	-0.274186	-0.03448	-0.0410415	0.00621126	0.897287	0.795182	0.964194	0.774856	0.27178	0.272881	0.939963
76	Triglycerides	1-stearoyl-2-arachidonoyl-GPI (18:0/20:4)	34	TRUE	-0.942518	0.47934	-0.270496	0.530625	-0.285558	-0.015944	0.0526234	0.279694	0.71185	0.548589	0.117476	0.773331	0.118527	0.0333514	0.939963
107	Triglycerides	1-stearoyl-2-linoleoyl-GPE (18:0/18:2)*	34	TRUE	-1.0212	0.401597	-0.017325	0.472137	-0.1049	-0.0113318	0.0475273	0.127839	0.298	0.959861	0.000569127	0.767824	0.168015	0.0125922	0.939963
439	HDL	ethylmalonate	30	TRUE	3.01223	-0.39794	0.0390897	0.0397535	0.0513381	-0.013071	-0.0257912	0.00136047	0.28799	0.918686	0.669265	0.770883	0.368035	0.242324	0.939963
495	Tot-cholesterol	tricosanoyl sphingomyelin (d18:1/23:0)*	22	TRUE	9.44612	0.0694922	0.15856	1.76542	-0.535893	-0.0674507	-0.0748804	8.38252e-06	0.970432	0.820956	0.0432069	0.766046	0.0398518	0.150332	0.939963
357	Tot-cholesterol	sphingomyelin (d18:2/24:1, d18:1/24:2)*	30	TRUE	9.13041	-0.623372	-0.147789	0.643443	0.39662	-0.0514137	-0.0575846	0.000428244	0.640244	0.858806	0.448627	0.76556	0.11659	0.179014	0.939963
77	HDL	1-stearoyl-2-docosapentaenoyl-GPC (18:0/22:5n6)*	30	TRUE	2.5024	-0.101295	-0.0111661	0.168559	-0.131976	-0.00486665	-0.031273	0.0102026	0.831833	0.975822	0.19621	0.772431	0.736245	0.116912	0.939963
307	Triglycerides	galactonate	26	TRUE	-0.873931	0.0135399	-0.0201076	0.139444	0.0561146	-0.0218346	0.0782885	0.3872	0.975559	0.964352	0.288619	0.815131	0.0784236	0.00507319	0.942364
264	LDL	sphingomyelin (d18:2/23:0, d18:1/23:1, d17:1/24:1)*	30	TRUE	4.96494	0.0060642	-0.0936455	0.872157	-0.277634	-0.0232926	-0.0497697	0.0219006	0.995935	0.898234	0.380617	0.815715	0.40046	0.189362	0.942364
395	Tot-cholesterol	sphingosine 1-phosphate	30	TRUE	12.2664	-0.00713605	-0.170592	-1.35054	-0.462323	-0.0870209	-0.0227085	5.44927e-09	0.996715	0.825624	0.0503568	0.817525	0.00353375	0.592155	0.942364
190	Triglycerides	2-methylcitrate/homocitrate	30	TRUE	-0.289446	0.0749134	-0.168522	-0.257486	0.199861	-0.0220162	0.0710686	0.784114	0.942646	0.740861	0.482759	0.819457	0.103514	0.0128006	0.942364
268	HDL	1-stearoyl-2-dihomo-linolenoyl-GPC (18:0/20:3n3 or 6)*	30	TRUE	2.32253	-0.280835	-0.0197181	0.376085	0.127044	-0.00263278	-0.0367725	0.00982069	0.573239	0.954294	0.0355017	0.819476	0.835624	0.0383661	0.942364
463	Tot-cholesterol	behenoyl sphingomyelin (d18:1/22:0)*	30	TRUE	8.20792	-0.536255	-0.17726	1.69914	0.423259	-0.0476582	-0.0701643	0.000107214	0.760995	0.814628	0.0322885	0.820543	0.102825	0.0899065	0.942364
296	Triglycerides	3-hydroxyisobutyrate	34	TRUE	-1.11638	0.119826	-0.0608809	0.101706	0.107881	-0.0143225	0.070584	0.350257	0.847402	0.896242	0.566363	0.82976	0.288049	0.00587273	0.942364
459	LDL	sphingomyelin (d17:1/16:0, d18:1/15:0, d16:1/17:0)*	30	TRUE	3.79006	-0.177069	-0.228616	1.91511	-0.244208	-0.0229115	-0.0428139	0.0241841	0.880188	0.704127	0.00469273	0.830075	0.303278	0.173707	0.942364
114	Tot-cholesterol	1-palmitoyl-2-arachidonoyl-GPC (16:0/20:4n6)	30	TRUE	10.2065	-0.502926	-0.218066	0.288955	0.277186	-0.0624135	-0.0604814	2.47273e-06	0.717857	0.794706	0.694192	0.830257	0.0470512	0.198846	0.942364
12	LDL	1-stearoyl-2-arachidonoyl-GPC (18:0/20:4)	30	TRUE	6.63117	-0.349055	-0.154852	-0.503558	0.185685	-0.0384119	-0.0275507	0.000311886	0.734516	0.830038	0.315893	0.830884	0.155214	0.477328	0.942364
54	Triglycerides	1-stearoyl-2-docosahexaenoyl-GPC (18:0/22:6)	34	TRUE	-0.43342	0.123804	-0.0418433	0.136467	0.0804747	-0.0203232	0.0575728	0.660702	0.793058	0.930553	0.579369	0.830937	0.0642456	0.0298536	0.942364
500	Glucose	oleoyl-linoleoyl-glycerol (18:1/18:2) [2]	37	TRUE	2.6482	0.429244	-0.225037	0.625502	-0.0830295	-0.00109614	0.0635032	0.105658	0.477805	0.665255	0.0245219	0.831789	0.960663	0.0592639	0.942364
365	Tot-cholesterol	phosphate	30	TRUE	7.45571	-7.75813	-0.233446	3.1849	7.53693	-0.0711781	-0.0429282	0.0362824	0.807713	0.777236	0.264912	0.814547	0.0368597	0.370979	0.942364
184	Glucose	1-palmitoyl-2-docosahexaenoyl-GPE (16:0/22:6)*	37	TRUE	2.12531	0.217129	-0.258867	0.545687	0.23703	0.00528213	0.0706607	0.250015	0.875657	0.640447	0.0435015	0.827053	0.829836	0.0538211	0.942364
151	Glucose	sphingomyelin (d18:1/21:0, d17:1/22:0, d16:1/23:0)*	37	TRUE	3.91277	0.829251	-0.252852	0.0355642	-0.303697	-0.0105374	0.0633819	0.0360911	0.508291	0.670938	0.963383	0.813862	0.686973	0.110566	0.942364
350	Triglycerides	sphingomyelin (d17:1/16:0, d18:1/15:0, d16:1/17:0)*	34	TRUE	-0.750433	0.41659	-0.101267	0.240615	-0.190787	-0.0185057	0.0625045	0.491014	0.629614	0.828205	0.62	0.820819	0.0972356	0.0170697	0.942364
213	Triglycerides	sphingomyelin (d18:2/24:1, d18:1/24:2)*	34	TRUE	-0.755013	0.426313	-0.0753367	0.16689	-0.185727	-0.0180835	0.0639707	0.467377	0.595466	0.875075	0.719183	0.812347	0.105024	0.0143574	0.942364
501	Tot-cholesterol	ribonate	30	TRUE	10.452	0.0964739	-0.253478	-0.0619911	-0.256793	-0.0623754	-0.0560018	7.58074e-07	0.93762	0.765568	0.876609	0.78491	0.0596544	0.236744	0.942364
283	HDL	1-palmitoyl-2-stearoyl-GPC (16:0/18:0)	30	TRUE	2.49524	-0.109159	-0.0102521	0.21776	-0.181181	-0.00664789	-0.0268777	0.0360168	0.867047	0.978388	0.568387	0.786015	0.648958	0.177839	0.942364
387	Tot-cholesterol	sphingomyelin (d18:1/17:0, d17:1/18:0, d19:1/16:0)	30	TRUE	9.29178	-0.783265	-0.198658	0.68191	0.390707	-0.0552603	-0.0556566	8.00081e-05	0.618947	0.808675	0.380132	0.787463	0.0766021	0.201086	0.942364
87	HDL	1-palmitoyl-2-linoleoyl-GPC (16:0/18:2)	30	TRUE	1.23034	0.0275066	0.233291	1.12906	-0.249519	0.00366309	-0.0354709	0.179104	0.97434	0.464126	0.000804015	0.794492	0.755787	0.0270389	0.942364
361	LDL	3-methyl-2-oxobutyrate	30	TRUE	6.02297	0.127572	-0.114576	0.423386	-0.150922	-0.0368586	-0.0553815	0.000662366	0.905306	0.872193	0.210351	0.797662	0.150672	0.141849	0.942364
499	Glucose	mannose	37	TRUE	1.70491	0.358038	0.112722	1.81997	-0.255645	0.00369989	0.0364929	0.321213	0.807423	0.822063	0.000995125	0.803583	0.86211	0.260306	0.942364
528	HDL	1,2-dilinoleoyl-GPC (18:2/18:2)	30	TRUE	2.63073	-0.395678	-0.0168375	0.375969	0.111252	-0.00939221	-0.0298898	0.00245884	0.363978	0.960796	0.046135	0.80429	0.445445	0.0840004	0.942364
188	LDL	sphingomyelin (d18:1/17:0, d17:1/18:0, d19:1/16:0)	30	TRUE	4.56472	-0.593901	-0.158869	0.925837	0.288435	-0.0197728	-0.0468754	0.0218566	0.655442	0.818771	0.158546	0.813813	0.453429	0.202632	0.942364
338	HDL	1-stearoyl-2-arachidonoyl-GPC (18:0/20:4)	30	TRUE	2.98669	-0.151518	-0.00236942	-0.0454825	-0.112605	-0.0109281	-0.0257928	0.00204208	0.779794	0.995023	0.863398	0.805695	0.442479	0.2064	0.942364
372	Glucose	sphingomyelin (d18:1/20:0, d16:1/22:0)*	37	TRUE	3.64555	0.98472	-0.241192	0.268277	-0.467749	-0.00932455	0.0622524	0.0689985	0.594869	0.686338	0.756994	0.808103	0.729435	0.128843	0.942364
133	LDL	ribitol	29	TRUE	5.35535	-0.573315	-0.560845	-1.4115	0.47496	-0.0154347	-0.0035477	0.00465732	0.776647	0.452493	0.100264	0.808639	0.624996	0.931285	0.942364
3	Triglycerides	1-palmitoyl-2-stearoyl-GPC (16:0/18:0)	34	TRUE	-1.10266	0.106697	-0.0593679	0.496866	0.180191	-0.0119438	0.0506154	0.182056	0.889909	0.884344	0.0971712	0.808747	0.236869	0.0247516	0.942364
73	Glucose	1-stearoyl-2-docosahexaenoyl-GPE (18:0/22:6)*	37	TRUE	1.72921	0.540621	-0.353026	0.680258	-0.132553	0.0130009	0.062616	0.311365	0.511503	0.501205	0.00558514	0.810072	0.597307	0.0858163	0.942364
489	HDL	glycerophosphorylcholine (GPC)	30	TRUE	2.65157	-0.105799	-0.0882291	0.192104	-0.174175	-0.0087939	-0.0271941	0.0108238	0.883355	0.825172	0.559034	0.810526	0.526576	0.171077	0.942364
194	Tot-cholesterol	1-margaroyl-2-linoleoyl-GPC (17:0/18:2)*	30	TRUE	8.54325	0.0127818	0.222672	1.84008	-0.4854	-0.064878	-0.0438766	8.46703e-06	0.995072	0.765771	0.00682209	0.811699	0.024061	0.28945	0.942364
221	Triglycerides	phosphate	34	TRUE	0.373834	3.09328	-0.0912196	-0.860657	-2.85979	-0.0176266	0.0587516	0.849236	0.821809	0.845941	0.636511	0.83626	0.11291	0.035285	0.945553
560	HDL	3-hydroxyisobutyrate	30	TRUE	2.86637	-0.394102	-0.0120211	0.0287574	0.112727	-0.00890789	-0.0291138	0.00287109	0.528999	0.974749	0.811201	0.838707	0.515018	0.131893	0.946446
540	Triglycerides	sphingomyelin (d18:2/14:0, d18:1/14:1)*	34	TRUE	-0.327482	0.275198	0.00690305	0.423893	-0.103805	-0.0193822	0.0446278	0.73315	0.589625	0.988573	0.330766	0.843696	0.0791401	0.122938	0.948328
262	Triglycerides	arabitol/xylitol	34	TRUE	-0.587526	0.0241109	-0.00619958	0.357513	0.139238	-0.0211716	0.0557397	0.537993	0.978172	0.988582	0.242292	0.842945	0.0565322	0.016248	0.948328
290	LDL	sphingomyelin (d18:1/14:0, d16:1/16:0)*	30	TRUE	4.41532	-0.0912856	-0.519095	1.53165	-0.181464	-0.019594	-0.060839	0.0099859	0.925967	0.421337	0.0258199	0.851164	0.40518	0.0648113	0.954842
551	LDL	sphingomyelin (d18:1/24:1, d18:2/24:0)*	30	TRUE	3.89109	0.0958471	-0.0343692	1.16663	-0.241868	-0.0136242	-0.046287	0.0974821	0.943068	0.961679	0.167397	0.853554	0.63535	0.214395	0.955021
166	LDL	phosphate	30	TRUE	5.65915	-5.39918	-0.176712	0.596818	5.29667	-0.0375781	-0.0356	0.0774169	0.850718	0.811906	0.816434	0.854669	0.220773	0.409721	0.955021
141	LDL	1-palmitoyl-2-eicosapentaenoyl-GPC (16:0/20:5)*	30	TRUE	5.70663	-0.283189	-0.217073	0.11614	0.0661246	-0.0276363	-0.0438465	0.00358382	0.646217	0.765502	0.669043	0.857895	0.314272	0.25361	0.956754
4	Triglycerides	sphingomyelin (d18:1/20:0, d16:1/22:0)*	34	TRUE	-0.888039	0.40415	-0.185401	0.922654	-0.147817	-0.0171219	0.0395503	0.354661	0.647873	0.668309	0.0866696	0.866591	0.0878031	0.138163	0.964568
85	Tot-cholesterol	choline phosphate	29	TRUE	8.96776	0.0365077	-0.322788	0.441703	-0.17501	-0.0573537	-0.0371705	0.000198366	0.977417	0.698903	0.331519	0.873585	0.0656143	0.404145	0.965086
384	HDL	1-stearoyl-2-linoleoyl-GPE (18:0/18:2)*	30	TRUE	2.48454	-0.201834	-0.00503306	0.101269	-0.0695334	-0.00389778	-0.029193	0.0324157	0.690245	0.989367	0.531496	0.873817	0.807427	0.126551	0.965086
397	Triglycerides	1-palmitoyl-2-linoleoyl-GPC (16:0/18:2)	34	TRUE	-1.28671	0.557202	0.0384139	0.618447	-0.225027	-0.0122848	0.0542951	0.174989	0.654349	0.930023	0.168162	0.871118	0.254356	0.0253168	0.965086
556	Triglycerides	1-stearoyl-2-dihomo-linolenoyl-GPC (18:0/20:3n3 or 6)*	34	TRUE	-0.946768	0.466004	-0.128366	0.532445	-0.0690654	-0.0126844	0.0442602	0.140506	0.241419	0.698236	0.000153191	0.87197	0.10387	0.0172751	0.965086
358	Glucose	1-stearoyl-2-dihomo-linolenoyl-GPC (18:0/20:3n3 or 6)*	37	TRUE	4.18435	0.661738	-0.219221	-0.106376	-0.162995	-0.012282	0.0628442	0.0257957	0.520408	0.716552	0.777852	0.876531	0.648421	0.104933	0.966215
62	Triglycerides	1-stearoyl-2-arachidonoyl-GPC (18:0/20:4)	34	TRUE	-0.624175	0.291641	-0.424558	0.79269	-0.0613402	-0.0191931	0.0370644	0.348854	0.514265	0.226751	0.000509206	0.88164	0.0164495	0.0595149	0.969974
304	LDL	sphingomyelin (d18:1/21:0, d17:1/22:0, d16:1/23:0)*	30	TRUE	5.29585	-0.0387378	-0.242266	0.908336	-0.17495	-0.0288187	-0.050891	0.00436959	0.974165	0.732137	0.217261	0.884367	0.290184	0.17956	0.971103
112	Tot-cholesterol	oleoyl-linoleoyl-glycerol (18:1/18:2) [2]	30	TRUE	11.2519	-0.0368489	-0.255946	-0.252787	-0.0666267	-0.0758709	-0.0463134	3.68885e-07	0.960111	0.755626	0.474445	0.887967	0.0116605	0.270754	0.971794
153	Tot-cholesterol	ribitol	29	TRUE	9.95175	-0.55856	-0.459901	-0.926654	0.329866	-0.0546803	-0.024576	1.14776e-05	0.817631	0.607272	0.368002	0.888401	0.148549	0.618232	0.971794
487	Glucose	3-hydroxy-2-ethylpropionate	37	TRUE	3.63296	0.256898	-0.10435	0.559304	0.191768	-0.0145487	0.0601688	0.0337728	0.885542	0.858787	0.187441	0.893264	0.558082	0.113632	0.974887
529	Glucose	fructose	37	TRUE	2.89664	0.364096	-0.19555	1.00232	0.150288	-0.00660499	0.0547881	0.116578	0.772729	0.726127	0.104153	0.895133	0.783892	0.119121	0.974887
163	Glucose	succinate	37	TRUE	2.50726	-0.154395	-0.245224	1.93832	0.956065	-0.00884782	0.0599282	0.178381	0.977093	0.665909	0.0904259	0.89635	0.718445	0.0931699	0.974887
161	Glucose	3-methylglutaconate	32	TRUE	3.25322	0.690705	-0.0917565	0.448786	-0.148737	-0.00907952	0.0644607	0.0715054	0.643737	0.868883	0.216125	0.905702	0.719723	0.0776812	0.975765
315	Triglycerides	sphingomyelin (d18:2/23:0, d18:1/23:1, d17:1/24:1)*	34	TRUE	-0.508187	0.141821	-0.0980045	0.0312196	0.0885642	-0.0191231	0.0621206	0.63775	0.850663	0.839061	0.957495	0.905388	0.0852137	0.0183167	0.975765
130	LDL	1-stearoyl-2-oleoyl-GPE (18:0/18:1)	28	TRUE	7.6801	-0.0380158	-0.202034	-0.277585	-0.0482868	-0.0518733	-0.0428006	0.000185834	0.950666	0.774657	0.309139	0.905088	0.0655452	0.236003	0.975765
435	HDL	1-oleoyl-2-dihomo-linolenoyl-GPC (18:1/20:3)*	30	TRUE	2.273	-0.29296	-0.0195819	0.23495	0.0575307	-0.00181984	-0.0310341	0.0162717	0.517828	0.955888	0.071561	0.902143	0.891139	0.0840438	0.975765
17	Tot-cholesterol	oleoyl-linoleoyl-glycerol (18:1/18:2) [1]	30	TRUE	10.9378	-0.0716553	-0.240907	-0.162293	-0.0660009	-0.0719051	-0.0476197	1.23556e-06	0.933211	0.77422	0.67137	0.904762	0.0186627	0.26477	0.975765
286	LDL	phosphatidylcholine (18:0/20:5, 16:0/22:5n6)*	30	TRUE	5.69758	-0.270303	-0.207131	0.158108	0.0536613	-0.0273758	-0.0454316	0.00374926	0.697114	0.77636	0.66293	0.909344	0.323751	0.236846	0.976991
110	Tot-cholesterol	1-palmitoyl-2-linoleoyl-GPI (16:0/18:2)	29	TRUE	8.59851	-0.394758	-0.0842408	0.728587	-0.0850079	-0.0412619	-0.0628405	0.000174317	0.65824	0.917026	0.218564	0.910261	0.201411	0.138965	0.976991
429	Triglycerides	sphingomyelin (d18:1/24:1, d18:2/24:0)*	34	TRUE	-0.635466	0.330061	-0.0964717	0.0333553	-0.0863185	-0.0184107	0.0650227	0.560692	0.716528	0.840716	0.947915	0.919451	0.108697	0.0130596	0.985003
324	Tot-cholesterol	sphingomyelin (d18:1/21:0, d17:1/22:0, d16:1/23:0)*	30	TRUE	9.59529	-0.204203	-0.272418	0.927854	-0.124496	-0.0610042	-0.0606715	7.23627e-06	0.882092	0.738084	0.273511	0.928354	0.0517412	0.164486	0.985792
331	Triglycerides	alpha-hydroxyisovalerate	34	TRUE	-0.373277	0.118155	-0.121932	-0.112574	0.0731627	-0.0205478	0.0670337	0.68981	0.902018	0.795067	0.352832	0.927283	0.104169	0.00824784	0.985792
471	HDL	1-stearoyl-2-arachidonoyl-GPE (18:0/20:4)	30	TRUE	3.24904	-0.304782	-0.0167463	-0.0911543	0.0301714	-0.013301	-0.0278524	0.00504772	0.52463	0.964728	0.624946	0.92882	0.39783	0.148049	0.985792
520	LDL	1-stearoyl-2-linoleoyl-GPI (18:0/18:2)	30	TRUE	6.64957	-0.143207	-0.195027	-0.47356	0.152602	-0.0358191	-0.0407192	0.00059535	0.935994	0.789293	0.49466	0.923998	0.172746	0.270267	0.985792
440	Triglycerides	glucose	34	TRUE	-1.00802	0.00109715	-0.0865555	0.508238	0.175241	-0.0170619	0.0586803	0.393405	0.999582	0.849855	0.415989	0.927137	0.115166	0.0298927	0.985792
518	HDL	isobutyrylcarnitine (C4)	30	TRUE	2.37272	-0.206032	-0.199228	-0.285744	-0.042808	0.000462783	-0.0196964	0.0111252	0.732126	0.586672	0.0615198	0.931018	0.974726	0.283849	0.986292
98	Triglycerides	2-methylbutyrylcarnitine (C5)	34	TRUE	-1.13478	0.299832	0.0904069	0.352211	-0.0426827	-0.0170446	0.066864	0.160311	0.617505	0.830246	0.0765693	0.934377	0.0764617	0.00174304	0.986846
234	Glucose	oleoyl-linoleoyl-glycerol (18:1/18:2) [1]	37	TRUE	2.79766	0.333936	-0.286279	0.621884	-0.0359072	-0.00413035	0.0655229	0.0938461	0.630884	0.589674	0.0338376	0.936749	0.855073	0.0562482	0.986846
48	HDL	arabonate/xylonate	30	TRUE	2.88238	-0.304136	0.00411866	-0.12281	0.0453087	-0.00857148	-0.0250921	0.00226632	0.652421	0.991327	0.57044	0.937659	0.530737	0.213433	0.986846
93	Glucose	galactonate	28	TRUE	4.11699	-0.0216899	-0.466434	0.0665382	-0.0272414	-0.00888783	0.0546766	0.0303043	0.977211	0.443213	0.620123	0.938454	0.752185	0.237478	0.986846
342	Triglycerides	sphingomyelin (d18:1/20:1, d18:2/20:0)*	34	TRUE	-0.655183	0.297005	-0.104837	0.153629	-0.0681781	-0.0184855	0.0619745	0.514829	0.784834	0.825329	0.784113	0.948682	0.0982587	0.0240556	0.99189
295	Triglycerides	palmitoyl dihydrosphingomyelin (d18:0/16:0)*	34	TRUE	-0.675624	0.286231	-0.0851903	0.185782	-0.0451045	-0.0179751	0.0601677	0.507981	0.686166	0.85684	0.630452	0.946664	0.103552	0.0234787	0.99189
533	HDL	N-acetylvaline	30	TRUE	3.04608	-0.264968	0.00683349	0.234288	-0.0394777	-0.0149155	-0.0289888	0.00141927	0.691413	0.985558	0.538203	0.947847	0.340489	0.161789	0.99189
536	Triglycerides	1-palmitoyl-2-arachidonoyl-GPC (16:0/20:4n6)	34	TRUE	-0.720501	0.254355	-0.336334	0.767279	0.0324471	-0.018083	0.0394536	0.307115	0.631246	0.364411	0.00530075	0.950199	0.0346186	0.0601921	0.99189
311	LDL	tricosanoyl sphingomyelin (d18:1/23:0)*	22	TRUE	5.0217	-0.220497	0.118217	1.67319	-0.0870955	-0.0277446	-0.0745951	0.00544647	0.890227	0.843038	0.0245427	0.954745	0.321158	0.0926675	0.994816
436	Tot-cholesterol	3-hydroxyisobutyrate	30	TRUE	10.4969	-0.189199	-0.207785	0.0140821	-0.0581464	-0.0678211	-0.0480479	8.72018e-07	0.891696	0.805305	0.957972	0.962273	0.0255405	0.262613	0.997324
413	Triglycerides	3-methyl-2-oxobutyrate	34	TRUE	-0.247247	0.271108	0.0146505	0.261485	-0.0137069	-0.0302171	0.0659818	0.815511	0.679533	0.974808	0.147992	0.983351	0.0500928	0.00645713	0.997324
148	Glucose	ethylmalonate	37	TRUE	3.57281	0.666598	-0.454421	-0.237296	-0.00784419	0.00136857	0.0619397	0.0369607	0.33286	0.435071	0.199481	0.981642	0.958828	0.121897	0.997324
298	Tot-cholesterol	phosphatidylcholine (18:0/20:5, 16:0/22:5n6)*	30	TRUE	9.79236	-0.357428	-0.236158	0.255078	0.0128553	-0.0577532	-0.0552366	1.13618e-05	0.650193	0.775356	0.535514	0.980824	0.06661	0.205069	0.997324
240	Triglycerides	sphingomyelin (d18:1/17:0, d17:1/18:0, d19:1/16:0)	34	TRUE	-0.620897	0.202722	-0.116801	0.208874	0.0189795	-0.0190169	0.059738	0.565762	0.808837	0.803749	0.601334	0.980804	0.0873985	0.0256319	0.997324
121	LDL	N-palmitoyl-sphingosine (d18:1/16:0)	30	TRUE	3.79209	-0.118618	-0.177893	1.02504	-0.0696385	-0.0153363	-0.0331564	0.119016	0.965869	0.801887	0.161023	0.979547	0.604124	0.391295	0.997324
53	LDL	1-palmitoyl-2-oleoyl-GPE (16:0/18:1)	30	TRUE	6.98617	-0.0945754	-0.183973	-0.175514	-0.0104076	-0.0458382	-0.0360713	0.00048095	0.874278	0.798451	0.380312	0.976659	0.105495	0.323307	0.997324
214	Tot-cholesterol	1-stearoyl-2-arachidonoyl-GPC (18:0/20:4)	30	TRUE	10.7469	-0.286734	-0.192135	-0.241	0.0284934	-0.0700806	-0.0417101	5.26804e-07	0.810976	0.819137	0.68027	0.977554	0.0259919	0.355682	0.997324
541	Triglycerides	tiglylcarnitine (C5:1-DC)	34	TRUE	-1.37954	0.3811	0.0357524	0.408193	-0.0493537	-0.0145247	0.0675629	0.0878428	0.808075	0.927776	0.0319259	0.974587	0.11596	0.00143062	0.997324
353	Triglycerides	arabonate/xylonate	34	TRUE	-0.868866	0.114396	0.0571052	0.634473	0.016839	-0.0160742	0.0480292	0.273332	0.830082	0.873128	0.00650592	0.971614	0.0663856	0.0119997	0.997324
362	Triglycerides	sphingomyelin (d18:1/21:0, d17:1/22:0, d16:1/23:0)*	34	TRUE	-0.475244	0.218249	-0.142954	0.612559	-0.0297262	-0.0212711	0.0460254	0.620775	0.756111	0.750513	0.170539	0.966519	0.0437083	0.0791195	0.997324
272	Tot-cholesterol	choline	30	TRUE	9.81807	-0.0745795	-0.177051	0.628837	-0.211673	-0.0653287	-0.0497274	0.000403435	0.987645	0.834584	0.706681	0.965758	0.0435297	0.275551	0.997324
242	LDL	3-hydroxyisobutyrate	30	TRUE	6.33982	-0.202607	-0.190702	-0.102669	0.0465007	-0.035029	-0.0403038	0.000656135	0.867182	0.79527	0.659436	0.965392	0.185862	0.281123	0.997324
14	Glucose	1-palmitoyl-2-adrenoyl-GPC (16:0/22:4)*	36	TRUE	3.73999	0.500487	-0.29906	0.0206218	0.0391209	-0.0067045	0.0617556	0.059392	0.553352	0.630798	0.922883	0.962368	0.812313	0.10698	0.997324
106	Triglycerides	1-palmitoyl-2-oleoyl-GPE (16:0/18:1)	34	TRUE	-1.00912	0.231684	-0.0970872	0.191056	0.00616256	-0.0121056	0.0580828	0.192011	0.455557	0.810944	0.0499541	0.975418	0.222599	0.00790233	0.997324
367	Triglycerides	3-methylglutaconate	30	TRUE	-0.712667	0.152554	0.0346811	0.643651	0.0137242	-0.0164127	0.0430868	0.438797	0.896005	0.926617	0.0085402	0.988755	0.10046	0.0667635	0.997489
97	LDL	sphingomyelin (d18:2/14:0, d18:1/14:1)*	30	TRUE	5.83859	-0.233679	0.0282343	0.712683	-0.0165396	-0.0268254	-0.0666345	0.00100471	0.80189	0.970856	0.398422	0.986397	0.313442	0.106914	0.997489
544	Tot-cholesterol	1-stearoyl-2-linoleoyl-GPI (18:0/18:2)	30	TRUE	10.8592	-0.160444	-0.218063	-0.346386	0.028283	-0.068393	-0.0493559	1.06616e-06	0.937603	0.794882	0.663834	0.987726	0.0235046	0.244959	0.997489
1	Triglycerides	stearoyl sphingomyelin (d18:1/18:0)	34	TRUE	-0.865169	0.261945	-0.234423	0.488877	0.00268745	-0.0160794	0.0516559	0.403846	0.799149	0.615481	0.304609	0.997864	0.132923	0.0560339	0.99963
344	Tot-cholesterol	1-palmitoyl-2-eicosapentaenoyl-GPC (16:0/20:5)*	30	TRUE	9.65419	-0.336983	-0.255511	0.241219	-0.000871511	-0.0570998	-0.0519728	1.23413e-05	0.62797	0.755449	0.430903	0.99833	0.0651064	0.22994	0.99963
146	Tot-cholesterol	N-palmitoyl-sphingosine (d18:1/16:0)	30	TRUE	7.65621	-0.284956	-0.203607	1.22453	-0.0280259	-0.044237	-0.040973	0.00564449	0.927975	0.800631	0.140909	0.992761	0.18847	0.351558	0.99963
379	Triglycerides	palmitoyl sphingomyelin (d18:1/16:0)	34	TRUE	-0.648709	0.23666	-0.0961533	0.0835843	0.00451635	-0.0182999	0.063402	0.595797	0.843527	0.839487	0.898229	0.996811	0.112507	0.013711	0.99963
352	Triglycerides	2-hydroxy-3-methylvalerate	34	TRUE	-0.387987	0.223585	-0.163003	-0.0667874	0.00020072	-0.0204411	0.0652775	0.683621	0.725264	0.737902	0.578106	0.99963	0.0944423	0.0103917	0.99963

## Sheet: M_E4
	col1	col2	n	converged	Intercept	C(APOE_Status)[T.E4]	Statin_User[T.Yes]	analyte2	analyte2:C(APOE_Status)[T.E4]	Age	BMI	Intercept_p	C(APOE_Status)[T.E4]_p	Statin_User[T.Yes]_p	analyte2_p	analyte2:C(APOE_Status)[T.E4]_p	Age_p	BMI_p	pval_adj
502	Triglycerides	choline phosphate	49	TRUE	-1.20391	1.35746	-0.00280584	0.253871	-1.22966	-0.0109069	0.0589766	0.0903084	0.000172669	0.993973	0.141055	0.000509304	0.21306	0.000858774	0.213397
291	HDL	1-palmitoyl-2-linoleoyl-GPE (16:0/18:2)	45	TRUE	2.13977	0.884697	0.0426921	0.147888	-0.895637	-0.00668121	-0.0122133	0.0100264	0.00160228	0.902632	0.262027	0.00074876	0.599563	0.448799	0.213397
383	HDL	1-stearoyl-2-linoleoyl-GPE (18:0/18:2)*	45	TRUE	2.20134	0.729442	0.0230739	0.0820031	-0.75	-0.00914937	-0.00628749	0.00828375	0.00571014	0.948371	0.575455	0.00310835	0.482587	0.710125	0.510616
106	Triglycerides	1-stearoyl-2-linoleoyl-GPE (18:0/18:2)*	50	TRUE	0.272289	-0.600979	-0.0460737	0.585669	0.849679	-0.0145221	0.0413066	0.729748	0.0463255	0.908265	0.00020654	0.00363815	0.122845	0.0412579	0.510616
131	HDL	succinylcarnitine (C4-DC)	43	TRUE	2.3509	1.44561	0.015222	0.0411885	-1.25395	-0.00841889	-0.0121008	0.00136057	0.0057054	0.968074	0.852454	0.00447909	0.454841	0.464616	0.510616
300	HDL	1-palmitoyl-2-arachidonoyl-GPE (16:0/20:4)*	45	TRUE	1.7769	0.730629	-0.0231614	0.124794	-0.683408	0.000963585	-0.0160134	0.0323169	0.0131204	0.949167	0.415787	0.00913406	0.9383	0.343332	0.580627
8	Triglycerides	1-stearoyl-2-oleoyl-GPE (18:0/18:1)	47	TRUE	0.490353	-0.532818	-0.150175	0.367435	0.681301	-0.019004	0.0511828	0.580834	0.0732363	0.738754	0.00721746	0.0091678	0.0726829	0.0250865	0.580627
105	Triglycerides	1-palmitoyl-2-oleoyl-GPE (16:0/18:1)	50	TRUE	0.526131	-0.464456	-0.113614	0.183989	0.691192	-0.0237197	0.0647183	0.576354	0.121386	0.812638	0.106661	0.00702621	0.0367149	0.00624029	0.580627
450	HDL	1-stearoyl-2-oleoyl-GPE (18:0/18:1)	43	TRUE	1.86194	0.531379	0.0138281	0.106533	-0.426226	-0.0070328	-3.03921e-07	0.0134092	0.0113858	0.967705	0.408123	0.00832299	0.55109	0.999985	0.580627
22	Glucose	1-margaroyl-2-linoleoyl-GPC (17:0/18:2)*	54	TRUE	3.79736	1.96208	0.0706889	1.12942	-1.99393	-0.0241662	0.0622849	0.00189716	0.0115874	0.883256	0.0343772	0.0102438	0.185296	0.0246313	0.583899
110	Triglycerides	N-acetylleucine	49	TRUE	0.589429	-1.17362	-0.123464	-0.530791	1.29348	-0.0234497	0.0895338	0.611622	0.0412633	0.81711	0.145599	0.0113333	0.0721847	0.000706465	0.587269
347	HDL	1,2-dipalmitoyl-GPC (16:0/16:0)	45	TRUE	0.538138	1.21908	0.209893	1.17253	-1.28652	0.00620742	-0.0183106	0.541936	0.0265449	0.568436	0.00342899	0.0233772	0.582366	0.267152	0.615235
302	Triglycerides	valine	50	TRUE	1.23492	-2.83382	-0.109274	-0.826506	2.88551	-0.0180501	0.0658296	0.34694	0.0406529	0.834446	0.441021	0.026984	0.143972	0.0143142	0.615235
207	LDL	1-stearoyl-2-arachidonoyl-GPI (18:0/20:4)	45	TRUE	6.79732	-2.15524	-0.255935	-0.441454	1.87758	-0.0215113	-0.0760012	5.84036e-06	0.0321768	0.730657	0.397493	0.0269348	0.340798	0.0286691	0.615235
201	Triglycerides	leucine	50	TRUE	1.54953	-2.27252	0.00178636	-1.39997	2.35065	-0.0205461	0.0830779	0.217222	0.046451	0.997366	0.105344	0.0263229	0.0987772	0.00237188	0.615235
298	LDL	ethylmalonate	45	TRUE	5.45788	-0.766357	-0.287911	0.00139475	0.634564	-0.0149293	-0.0586771	7.41978e-05	0.0878435	0.692314	0.993626	0.0260914	0.489936	0.0898696	0.615235
489	HDL	1,5-anhydroglucitol (1,5-AG)	45	TRUE	1.20757	0.807277	-0.0809455	0.632099	-0.778371	0.00658988	-0.0276829	0.178335	0.0280359	0.828027	0.0465399	0.0235196	0.603404	0.120907	0.615235
20	Triglycerides	1-palmitoyl-2-linoleoyl-GPE (16:0/18:2)	50	TRUE	0.12912	-0.451523	-0.0261699	0.370676	0.739916	-0.0181063	0.0612096	0.890611	0.183744	0.95552	0.0316836	0.0232583	0.102352	0.00790182	0.615235
47	HDL	2-hydroxy-3-methylvalerate	45	TRUE	1.585	0.582273	-0.0219103	0.253274	-0.411096	0.00282449	-0.0214372	0.0250827	0.0296524	0.951612	0.0115156	0.01892	0.799778	0.20856	0.615235
498	Glucose	mannose	54	TRUE	2.07664	1.77825	0.147389	1.78862	-1.57101	-0.0022474	0.0379293	0.111055	0.0244454	0.743613	0.000350884	0.0178156	0.895894	0.134611	0.615235
253	LDL	malate	44	TRUE	4.11353	-1.73319	-0.492924	-0.146986	1.61087	0.0139439	-0.0698813	0.00916142	0.0232968	0.507954	0.700283	0.0173535	0.579926	0.0373927	0.615235
280	Triglycerides	N-acetylvaline	50	TRUE	0.90713	-1.21272	-0.173952	-0.291313	1.33649	-0.0278375	0.0779135	0.414719	0.0461372	0.743229	0.455455	0.0161349	0.0241142	0.00220526	0.615235
248	HDL	tiglylcarnitine (C5:1-DC)	45	TRUE	2.06211	0.792659	-0.0164842	0.13423	-0.67667	-0.00287156	-0.0181108	0.00646268	0.0188611	0.963985	0.449285	0.0146092	0.796648	0.278138	0.615235
382	HDL	1-palmitoyl-2-oleoyl-GPE (16:0/18:1)	45	TRUE	1.84274	0.527018	-0.00179422	0.113091	-0.422982	-0.00264472	-0.00991866	0.0183619	0.0272025	0.996114	0.259954	0.014052	0.832236	0.57214	0.615235
142	Glucose	arabonate/xylonate	54	TRUE	4.44027	0.968901	-0.538257	0.934046	-1.05407	-0.0145642	0.0246229	0.000100849	0.0377884	0.257573	0.00550867	0.0197318	0.406651	0.367867	0.615235
278	LDL	behenoyl sphingomyelin (d18:1/22:0)*	45	TRUE	4.12717	-1.42112	-0.202989	1.38995	1.81501	-0.0101406	-0.0701913	0.00117937	0.0702625	0.721004	0.0202181	0.0286854	0.556141	0.00699675	0.618136
560	LDL	1-palmitoyl-2-arachidonoyl-GPI (16:0/20:4)*	43	TRUE	5.00563	-1.17335	-0.346286	-0.0488039	1.11598	0.00261469	-0.0818345	0.00132421	0.0524245	0.622157	0.884915	0.0297269	0.912072	0.0136805	0.618136
80	HDL	1-palmitoyl-2-docosahexaenoyl-GPE (16:0/22:6)*	45	TRUE	1.97386	0.590032	-0.0110907	0.0678819	-0.611788	-0.00164465	-0.0148824	0.0169194	0.0473162	0.976508	0.64249	0.0312971	0.888339	0.386495	0.618136
470	HDL	1-stearoyl-2-arachidonoyl-GPE (18:0/20:4)	45	TRUE	2.22955	0.639418	-0.026834	-0.0522754	-0.54659	-0.00743643	-0.00593876	0.00629207	0.0336327	0.940308	0.757103	0.031449	0.538782	0.725097	0.618136
420	Triglycerides	isovalerylglycine	46	TRUE	1.21727	-0.620937	-0.236162	-0.490097	0.847864	-0.0318308	0.0818241	0.363141	0.164301	0.668987	0.125275	0.0333597	0.0207999	0.00589535	0.632919
558	HDL	N-acetylleucine	44	TRUE	2.2297	0.983297	-0.0854319	0.235558	-0.903979	-0.00924952	-0.0119813	0.00358192	0.0319779	0.822561	0.405314	0.0344219	0.479332	0.493466	0.632919
462	Tot-cholesterol	behenoyl sphingomyelin (d18:1/22:0)*	45	TRUE	6.6408	-1.38176	-0.292286	1.7888	1.91443	-0.0230214	-0.0726214	2.99391e-06	0.115207	0.645369	0.00747851	0.0388991	0.23175	0.0125147	0.69289
376	HDL	1-stearoyl-2-docosahexaenoyl-GPE (18:0/22:6)*	45	TRUE	2.29508	0.508681	-0.0405377	-0.0675206	-0.526889	-0.00737944	-0.0079589	0.00341921	0.0718761	0.911971	0.628707	0.0464583	0.522198	0.642589	0.715709
206	Glucose	3-methyl-2-oxobutyrate	54	TRUE	5.26562	-0.870945	0.19424	-0.452984	0.558667	-0.0191851	0.0627585	2.64285e-05	0.0774016	0.706848	0.0514207	0.0464428	0.319853	0.0303214	0.715709
354	Tot-cholesterol	1-palmitoyl-2-docosahexaenoyl-GPE (16:0/22:6)*	45	TRUE	8.71301	1.39504	-0.272965	0.244894	-1.31794	-0.0322681	-0.0738702	5.66253e-06	0.0435101	0.755048	0.470945	0.0458409	0.23567	0.0642577	0.715709
46	LDL	1-stearoyl-2-oleoyl-GPC (18:0/18:1)	45	TRUE	5.6518	-1.68399	-0.362796	0.0315833	1.94417	-0.00231466	-0.0953919	0.00050527	0.0584856	0.627931	0.928361	0.0420716	0.924172	0.00712178	0.715709
27	HDL	alpha-hydroxyisovalerate	45	TRUE	1.5914	0.759048	0.00573002	0.2845	-0.62625	0.00276712	-0.0212819	0.03234	0.0501459	0.987682	0.0486033	0.0458958	0.809189	0.218208	0.715709
377	LDL	sphingosine 1-phosphate	45	TRUE	7.08893	-1.94828	-0.330458	-1.28253	2.24696	-0.0196465	-0.06407	1.48863e-05	0.0626203	0.658081	0.0531281	0.0479672	0.404136	0.0645224	0.716441
32	Triglycerides	alpha-hydroxyisocaproate	50	TRUE	1.27871	-0.941295	0.126019	-0.503397	0.908797	-0.0246682	0.0704789	0.306991	0.128797	0.8248	0.174057	0.0490196	0.0584727	0.008904	0.716441
453	Triglycerides	1-palmitoyl-2-docosahexaenoyl-GPC (16:0/22:6)	50	TRUE	0.513751	-0.502574	-0.163395	-0.136196	0.739113	-0.0218773	0.0740759	0.63801	0.300923	0.770252	0.644229	0.0951959	0.0847746	0.00551114	0.738622
416	LDL	palmitoyl dihydrosphingomyelin (d18:0/16:0)*	45	TRUE	4.275	-1.04713	-0.147456	1.23278	1.39831	-0.0200833	-0.0456091	0.00210527	0.195472	0.821095	0.0194146	0.114537	0.309131	0.136563	0.738622
262	Glucose	1-palmitoyl-2-docosahexaenoyl-GPC (16:0/22:6)	54	TRUE	3.465	1.24279	-0.114417	0.543333	-1.13221	-0.0092903	0.0557259	0.013316	0.109776	0.816692	0.205534	0.111794	0.615237	0.056639	0.738622
474	LDL	1-palmitoyl-2-linoleoyl-GPI (16:0/18:2)	44	TRUE	4.02062	-0.941196	-0.251632	0.373041	1.09309	0.00875402	-0.0735287	0.0122195	0.133431	0.725524	0.469305	0.109852	0.706297	0.0239491	0.738622
523	LDL	phosphatidylcholine (16:0/22:5n3, 18:1/20:4)*	45	TRUE	6.89205	-1.89651	-0.255729	-0.364483	1.9182	-0.0220476	-0.0807276	6.39002e-05	0.127998	0.738131	0.611995	0.109739	0.346097	0.0217839	0.738622
250	LDL	choline	45	TRUE	5.82409	-2.72951	-0.371877	-0.481977	2.84276	-0.00633616	-0.0751459	0.00524667	0.106341	0.618291	0.743654	0.107669	0.782433	0.0266539	0.738622
77	HDL	1-stearoyl-2-docosapentaenoyl-GPC (18:0/22:5n6)*	44	TRUE	1.64097	0.474232	-0.0139992	0.165777	-0.359856	-0.00240049	-0.00558547	0.0350533	0.0976452	0.970582	0.216018	0.104767	0.8472	0.772281	0.738622
242	HDL	1-palmitoyl-2-linoleoyl-GPI (16:0/18:2)	44	TRUE	1.99021	0.531889	0.0193853	0.250335	-0.603981	-0.00180473	-0.019549	0.0230519	0.120217	0.960476	0.373626	0.105521	0.88681	0.271372	0.738622
536	Glucose	2-methylcitrate/homocitrate	40	TRUE	5.24009	-0.818419	-1.83945e-05	-0.602073	1.03357	-0.0141945	0.0381567	0.000152625	0.17729	0.999969	0.200511	0.103149	0.519799	0.230883	0.738622
566	Glucose	sphingomyelin (d18:2/24:1, d18:1/24:2)*	54	TRUE	3.03125	1.36256	-0.110711	1.16819	-1.42004	-0.00559492	0.0449509	0.0306549	0.100944	0.817365	0.0458437	0.100701	0.759834	0.101143	0.738622
15	LDL	N-acetylisoleucine	44	TRUE	6.36608	-1.35297	-0.200471	-0.62201	1.3446	-0.00533237	-0.0929662	3.86687e-05	0.155617	0.792924	0.187713	0.0984955	0.844973	0.0100132	0.738622
532	HDL	N-acetylvaline	45	TRUE	1.96248	0.880137	-0.0357606	0.00189819	-0.777236	-0.00297789	-0.0086903	0.00517172	0.0819632	0.922418	0.995654	0.0957135	0.799428	0.614552	0.738622
311	LDL	3-methylglutaconate	42	TRUE	6.19628	-1.05985	-0.52356	-0.640108	1.21918	-0.0141936	-0.0630237	6.94404e-05	0.146749	0.505674	0.106829	0.106292	0.550994	0.0850759	0.738622
29	Tot-cholesterol	mannitol/sorbitol	45	TRUE	8.77748	0.511136	-0.429111	-0.00585259	-0.180708	-0.027089	-0.0772971	5.41226e-07	0.182445	0.626248	0.901698	0.115428	0.332554	0.054049	0.738622
418	Glucose	1-stearoyl-2-docosahexaenoyl-GPC (18:0/22:6)	54	TRUE	3.7159	1.1606	-0.207129	0.404642	-1.06531	-0.0109268	0.0559851	0.00556032	0.116736	0.668946	0.252727	0.117075	0.551113	0.052871	0.738622
317	Tot-cholesterol	ethylmalonate	45	TRUE	8.53844	-0.541777	-0.390483	0.0173683	0.535758	-0.0294612	-0.0647049	2.40906e-07	0.314726	0.654766	0.933941	0.117578	0.256322	0.11917	0.738622
251	Tot-cholesterol	1-stearoyl-2-docosahexaenoyl-GPE (18:0/22:6)*	45	TRUE	8.73356	1.11253	-0.294569	0.190953	-0.99982	-0.0362008	-0.0631268	4.17854e-06	0.103863	0.73996	0.572076	0.118497	0.194608	0.128311	0.738622
390	LDL	1-palmitoyl-2-oleoyl-GPC (16:0/18:1)	45	TRUE	6.01577	-1.82035	-0.301903	0.0189156	1.98086	-0.0136629	-0.082342	0.000663331	0.136645	0.692927	0.970596	0.119073	0.581134	0.0196169	0.738622
153	LDL	sphingomyelin (d18:2/24:1, d18:1/24:2)*	45	TRUE	4.80136	-1.61004	-0.19421	0.499605	1.79804	-0.0113595	-0.0602767	0.0070786	0.141125	0.793598	0.497811	0.119282	0.620953	0.0762551	0.738622
267	HDL	1-stearoyl-2-dihomo-linolenoyl-GPC (18:0/20:3n3 or 6)*	45	TRUE	1.47349	0.615307	-0.0394835	0.366733	-0.605661	0.0026902	-0.0177945	0.0541362	0.121565	0.916395	0.0611919	0.120873	0.821321	0.33654	0.738622
264	Glucose	3-methyl-2-oxovalerate	54	TRUE	5.32078	-0.839856	0.031004	-0.383241	0.585734	-0.0189766	0.0532676	3.328e-05	0.153503	0.952014	0.236683	0.121025	0.329392	0.0636818	0.738622
277	Triglycerides	1,2-dilinoleoyl-GPC (18:2/18:2)	50	TRUE	0.112234	0.932057	0.037374	0.321123	-0.733322	-0.02111	0.0710698	0.918256	0.0512911	0.947517	0.285587	0.12257	0.101861	0.00956634	0.738622
39	HDL	sphingomyelin (d18:1/20:1, d18:2/20:0)*	45	TRUE	2.34559	-0.984017	-0.0813207	-0.227557	1.17589	-0.00168211	-0.0180081	0.00809578	0.147782	0.83403	0.69066	0.124917	0.883608	0.303179	0.738622
541	Glucose	4-methyl-2-oxopentanoate	54	TRUE	5.20828	-0.762845	0.0638782	-0.408688	0.506458	-0.0155167	0.052403	5.69897e-05	0.168129	0.901561	0.141607	0.125139	0.436448	0.0648365	0.738622
448	Tot-cholesterol	sphingomyelin (d18:2/23:0, d18:1/23:1, d17:1/24:1)*	45	TRUE	6.64992	-1.7033	-0.21403	1.46373	2.0497	-0.0171558	-0.0704388	0.000258599	0.156404	0.779379	0.156145	0.125899	0.456378	0.040712	0.738622
309	HDL	1-palmitoyl-2-adrenoyl-GPC (16:0/22:4)*	45	TRUE	1.34324	0.337929	-0.10378	0.21802	-0.3314	0.00660406	-0.0162947	0.0859525	0.180422	0.781072	0.0337293	0.126626	0.584142	0.345075	0.738622
218	Glucose	trimethylamine N-oxide	54	TRUE	4.31104	0.379331	-0.056112	0.359877	-0.325365	-0.0141918	0.044146	0.000232037	0.278825	0.907044	0.0338155	0.126991	0.431525	0.111497	0.738622
172	Glucose	1-margaroyl-2-oleoyl-GPC (17:0/18:1)*	54	TRUE	3.43983	1.29263	-0.228156	0.668393	-1.30608	-0.01056	0.0587301	0.0205057	0.117304	0.637685	0.270211	0.115536	0.56911	0.0460736	0.738622
7	LDL	1-palmitoyl-2-oleoyl-GPI (16:0/18:1)*	44	TRUE	5.75285	-0.99457	-0.226499	-0.175136	1.15768	-0.00984924	-0.0766531	0.000473448	0.147637	0.769299	0.654314	0.0942191	0.688744	0.0284278	0.738622
520	LDL	alpha-ketoglutarate	45	TRUE	5.67115	-1.11635	-0.37105	-0.109836	0.616826	-0.00345334	-0.0860591	0.000187092	0.123484	0.626162	0.651568	0.0990934	0.885948	0.0150262	0.738622
162	Glucose	succinate	54	TRUE	3.2066	1.47502	-0.191956	1.94655	-1.95704	-0.0132542	0.0446025	0.0190478	0.102513	0.688083	0.0464584	0.0914885	0.471154	0.104031	0.738622
550	LDL	sphingomyelin (d18:1/24:1, d18:2/24:0)*	45	TRUE	3.94712	-1.8263	-0.0398825	1.16673	2.05001	-0.0128007	-0.0501906	0.023394	0.118119	0.954055	0.139093	0.0936951	0.551104	0.11573	0.738622
430	Glucose	isovalerylcarnitine (C5)	54	TRUE	5.07472	-0.791661	-0.123014	-0.360008	0.629923	-0.0155724	0.0503011	2.63942e-05	0.0864182	0.798748	0.162919	0.051895	0.396353	0.0818789	0.738622
160	Glucose	3-methylglutaconate	49	TRUE	3.50501	1.21059	-0.0820927	0.46844	-1.1271	-0.00830444	0.0530387	0.00206589	0.0282356	0.853772	0.113146	0.0531453	0.63187	0.0437188	0.738622
81	HDL	glycerophosphoethanolamine	45	TRUE	1.17581	0.643559	0.0357347	0.584753	-0.64596	0.00239161	-0.0131615	0.122728	0.0476497	0.921849	0.0072866	0.0548944	0.827648	0.438582	0.738622
392	Triglycerides	1-palmitoyl-2-docosahexaenoyl-GPE (16:0/22:6)*	50	TRUE	0.324308	-0.293467	-0.0663739	0.124154	0.590516	-0.0230852	0.0734969	0.749938	0.387723	0.897207	0.558094	0.0584246	0.0498208	0.00324567	0.738622
352	Triglycerides	arabonate/xylonate	50	TRUE	-1.36864	1.02858	0.137307	1.07903	-0.903974	-0.0136498	0.0842129	0.219893	0.0393085	0.789452	0.00128774	0.0587596	0.273071	0.00067004	0.738622
226	Tot-cholesterol	1-stearoyl-2-arachidonoyl-GPI (18:0/20:4)	45	TRUE	9.64173	-2.07275	-0.377763	-0.184963	1.83406	-0.0356216	-0.0829445	2.66992e-08	0.0746781	0.660222	0.759065	0.0615138	0.172332	0.0388347	0.738622
30	Glucose	sphingomyelin (d18:1/17:0, d17:1/18:0, d19:1/16:0)	54	TRUE	3.41904	1.41851	-0.0712901	1.01536	-1.48701	-0.0126293	0.0530463	0.0126155	0.0661622	0.88293	0.0782945	0.0636815	0.490686	0.0570995	0.738622
177	Triglycerides	ethylmalonate	50	TRUE	0.264691	-0.238734	-0.154863	-0.0846163	0.40246	-0.0248589	0.0884528	0.799897	0.440476	0.778506	0.511226	0.0660341	0.0488575	0.00117712	0.738622
76	Triglycerides	1-stearoyl-2-arachidonoyl-GPI (18:0/20:4)	50	TRUE	-0.083239	-1.00761	-0.362607	0.756976	0.995991	-0.0206381	0.0605666	0.928437	0.0913976	0.448932	0.034099	0.0681261	0.0544271	0.00873707	0.738622
49	Glucose	arabitol/xylitol	54	TRUE	4.52787	1.40052	-0.286142	0.615718	-1.16699	-0.0145094	0.0253733	0.000272356	0.0762905	0.55565	0.121116	0.070204	0.437818	0.390647	0.738622
178	Tot-cholesterol	alpha-hydroxyisocaproate	45	TRUE	8.8965	1.7103	-0.459071	0.581492	-1.18732	-0.0411259	-0.0785445	3.68164e-07	0.0599727	0.600349	0.197702	0.0714158	0.129924	0.0499784	0.738622
158	HDL	N-acetylisoleucine	44	TRUE	2.26122	0.89202	-0.0278067	0.0899123	-0.725882	-0.00894916	-0.00879449	0.00323793	0.059343	0.941534	0.701308	0.0724136	0.508627	0.623635	0.738622
463	Tot-cholesterol	alpha-hydroxyisovalerate	45	TRUE	9.04503	1.70325	-0.350053	0.13054	-1.32221	-0.0344438	-0.0767543	2.34369e-07	0.0617661	0.68852	0.700561	0.0732389	0.201448	0.0591154	0.738622
372	HDL	2-methylbutyrylcarnitine (C5)	45	TRUE	2.00627	0.69634	0.0654149	0.170836	-0.539278	-0.00530703	-0.0122919	0.00808563	0.0608025	0.86686	0.360626	0.0562526	0.655235	0.485368	0.738622
173	HDL	1-myristoyl-2-palmitoyl-GPC (14:0/16:0)	45	TRUE	1.07669	0.44068	0.057819	0.582901	-0.524126	0.0100055	-0.0248879	0.155929	0.119513	0.871743	0.0027568	0.0741842	0.377578	0.137665	0.738622
68	Triglycerides	isovalerylcarnitine (C5)	50	TRUE	0.6947	-0.480348	-0.152146	-0.125175	0.49886	-0.0265867	0.0781574	0.516514	0.250095	0.780824	0.551776	0.0756537	0.0367879	0.00417145	0.738622
407	Glucose	sphingomyelin (d18:1/24:1, d18:2/24:0)*	54	TRUE	2.52889	1.73552	0.00629412	1.50581	-1.76788	-0.00327377	0.0446291	0.0864377	0.0739367	0.989596	0.0256808	0.0762925	0.857686	0.10182	0.738622
440	Tot-cholesterol	malate	44	TRUE	6.81056	-1.45025	-0.56791	0.115964	1.3792	0.00141555	-0.0740399	0.000197768	0.10154	0.510566	0.793341	0.0788934	0.961341	0.0571244	0.738622
263	LDL	sphingomyelin (d18:2/23:0, d18:1/23:1, d17:1/24:1)*	45	TRUE	4.22175	-1.7976	-0.163522	1.01506	2.06001	-0.00549916	-0.0679226	0.0083348	0.0888964	0.807674	0.263322	0.0802023	0.785968	0.0248018	0.738622
426	Tot-cholesterol	3-methyl-2-oxovalerate	45	TRUE	7.84439	1.93026	-0.230476	1.00762	-1.17239	-0.0325357	-0.0855544	1.28159e-05	0.0706943	0.79361	0.0922989	0.080557	0.228039	0.0334816	0.738622
475	HDL	phosphate	45	TRUE	-0.338513	3.23596	-0.0865522	2.48814	-3.26947	-0.000339444	-0.0197783	0.824765	0.0852834	0.818934	0.0592916	0.0850521	0.977392	0.25723	0.738622
366	Triglycerides	3-methylglutaconate	47	TRUE	-0.794996	0.787504	0.033964	0.631039	-0.728485	-0.0173355	0.0485187	0.34411	0.0427775	0.937299	0.0227526	0.0851879	0.0893113	0.0228073	0.738622
404	Triglycerides	isobutyrylglycine	50	TRUE	0.818053	-0.373083	-0.176535	-0.177057	0.541771	-0.0256571	0.0722938	0.476276	0.331057	0.749934	0.418858	0.0857744	0.0498411	0.00717135	0.738622
393	HDL	choline	45	TRUE	1.40123	1.50564	0.0122281	0.781273	-1.54886	-0.0020483	-0.0167611	0.190354	0.0824074	0.974515	0.301328	0.0874364	0.861815	0.335047	0.738622
320	Glucose	2-hydroxy-3-methylvalerate	54	TRUE	4.84319	-0.686082	-0.254423	-0.155335	0.524802	-0.0135937	0.0462124	6.40407e-05	0.139353	0.59899	0.348683	0.090575	0.465932	0.108686	0.738622
100	Triglycerides	1-stearoyl-2-docosahexaenoyl-GPE (18:0/22:6)*	50	TRUE	0.378769	-0.220404	-0.0943634	0.141383	0.463037	-0.0199637	0.0643182	0.702822	0.474236	0.851525	0.488409	0.0899025	0.086956	0.00967476	0.738622
549	Glucose	glycerate	54	TRUE	4.18676	1.35494	-0.137828	0.939167	-1.73816	-0.0135504	0.0369376	0.000445552	0.0818164	0.774536	0.0991847	0.0732491	0.457506	0.182653	0.738622
148	Tot-cholesterol	sphingomyelin (d18:1/20:0, d16:1/22:0)*	45	TRUE	7.60333	-1.17026	-0.27912	1.80566	1.56812	-0.0338948	-0.0824201	1.1104e-05	0.335091	0.710202	0.0435755	0.221177	0.135839	0.016538	0.757797
542	Glucose	1-palmitoyl-2-stearoyl-GPC (16:0/18:0)	54	TRUE	4.22625	0.883345	-0.169989	0.393046	-0.927121	-0.0135139	0.04659	0.0022057	0.224357	0.72918	0.438688	0.221403	0.473985	0.0993173	0.757797
217	HDL	choline phosphate	44	TRUE	1.57655	0.637978	-0.131079	0.280076	-0.535839	0.00030996	-0.0143617	0.0746946	0.210124	0.737261	0.182502	0.221683	0.97924	0.431479	0.757797
221	Tot-cholesterol	1,2-dipalmitoyl-GPC (16:0/16:0)	45	TRUE	4.40328	1.47308	0.234417	3.03413	-1.48186	-0.00512759	-0.0738647	0.0213369	0.216318	0.768884	0.000477426	0.228349	0.834023	0.0389394	0.757797
198	Tot-cholesterol	1-palmitoyl-2-arachidonoyl-GPI (16:0/20:4)*	43	TRUE	6.99008	-0.712806	-0.487599	0.402941	0.718991	0.00201723	-0.0960905	0.000101694	0.307056	0.547508	0.300248	0.224759	0.941131	0.0120884	0.757797
70	Triglycerides	1,2-dipalmitoyl-GPC (16:0/16:0)	50	TRUE	0.0530759	-0.528663	-0.0963134	0.0327511	0.765151	-0.020044	0.0802835	0.963674	0.420069	0.862989	0.934733	0.225505	0.125667	0.00278986	0.757797
335	HDL	1-palmitoyl-2-oleoyl-GPI (16:0/18:1)*	44	TRUE	1.93101	0.410383	-0.0977704	0.119571	-0.432239	-0.000563206	-0.0164454	0.0232796	0.247953	0.806595	0.554398	0.226924	0.96467	0.363276	0.757797
115	Tot-cholesterol	tiglylcarnitine (C5:1-DC)	45	TRUE	9.23211	1.07899	-0.363025	0.113904	-0.812873	-0.0350581	-0.0809374	5.74678e-07	0.189943	0.683456	0.792343	0.229027	0.197035	0.0468772	0.757797
315	Glucose	1-oleoyl-2-docosahexaenoyl-GPC (18:1/22:6)*	54	TRUE	3.99343	0.895523	-0.152896	0.381008	-0.854405	-0.0135759	0.054837	0.00351625	0.227948	0.758908	0.436996	0.224061	0.474374	0.0848993	0.757797
484	Glucose	lactate	54	TRUE	3.75965	1.18966	-0.263211	0.856046	-1.20467	-0.0128936	0.0465454	0.00832437	0.239947	0.590103	0.105587	0.220534	0.523784	0.094554	0.757797
222	Tot-cholesterol	isovalerylcarnitine (C5)	45	TRUE	8.97706	0.98057	-0.349598	0.228051	-0.591595	-0.0350846	-0.0772813	2.76024e-07	0.162831	0.694213	0.543356	0.215032	0.201012	0.0661224	0.757797
504	Tot-cholesterol	palmitoyl sphingomyelin (d18:1/16:0)	45	TRUE	4.41874	-1.3192	0.123386	2.96178	1.77351	-0.025635	-0.0265959	0.0222043	0.330749	0.860408	0.00592599	0.219287	0.227935	0.416196	0.757797
90	Glucose	malate	53	TRUE	4.40569	0.647608	-0.107476	0.962457	-0.635061	-0.0212134	0.0374641	0.000161916	0.245442	0.809644	0.00126919	0.218837	0.249983	0.139585	0.757797
508	LDL	sphingomyelin (d18:1/20:0, d16:1/22:0)*	45	TRUE	4.7847	-1.11135	-0.180669	1.56619	1.38476	-0.0191172	-0.0789875	0.00151868	0.293868	0.782698	0.0447174	0.215406	0.334736	0.00843924	0.757797
438	HDL	ethylmalonate	45	TRUE	2.11315	0.272351	-0.0340501	0.0268709	-0.190754	-3.01591e-05	-0.0222167	0.00444244	0.260643	0.930842	0.775319	0.214892	0.997936	0.233709	0.757797
74	LDL	3-hydroxy-2-ethylpropionate	45	TRUE	6.3091	-0.888971	-0.180742	0.137786	0.823283	-0.0267952	-0.0682346	2.42977e-05	0.271229	0.816194	0.758054	0.213007	0.253375	0.0505772	0.757797
455	HDL	1-palmitoyl-2-eicosapentaenoyl-GPC (16:0/20:5)*	45	TRUE	1.67383	0.393581	-0.0478955	0.137513	-0.31863	0.000175055	-0.011425	0.0354868	0.221826	0.901692	0.339952	0.212378	0.988153	0.530174	0.757797
332	LDL	1-palmitoyl-2-docosahexaenoyl-GPE (16:0/22:6)*	45	TRUE	6.06381	0.743184	-0.241762	0.0666528	-0.739699	-0.0190155	-0.0740039	0.000431832	0.230744	0.758141	0.826918	0.211702	0.436129	0.0388562	0.757797
96	LDL	sphingomyelin (d18:2/14:0, d18:1/14:1)*	45	TRUE	5.41578	-1.01852	0.00813822	0.898138	1.3275	-0.010958	-0.0929542	7.8515e-05	0.249948	0.991367	0.262802	0.210138	0.60286	0.0067073	0.757797
180	Tot-cholesterol	1-palmitoyl-2-arachidonoyl-GPE (16:0/20:4)*	45	TRUE	8.80491	0.952262	-0.367912	0.140551	-0.770444	-0.0299282	-0.0781495	1.57027e-05	0.18806	0.680095	0.709024	0.231437	0.32763	0.0597067	0.757797
290	HDL	alpha-ketoglutarate	45	TRUE	1.80325	0.417765	-0.0232156	0.165416	-0.232913	-0.00144747	-0.0159081	0.0192855	0.256175	0.952124	0.18034	0.219914	0.905728	0.375899	0.757797
104	HDL	3-methyl-2-oxobutyrate	45	TRUE	1.73586	0.465045	-0.00381995	0.311026	-0.267087	-0.00094034	-0.0242942	0.0231942	0.255649	0.99202	0.0820654	0.231654	0.936687	0.177524	0.757797
562	Triglycerides	beta-hydroxyisovalerate	50	TRUE	0.629965	-0.308108	-0.13063	-0.502577	0.432754	-0.0270636	0.0996625	0.562195	0.545264	0.810745	0.0618654	0.248996	0.0407901	0.000454292	0.757797
214	HDL	palmitoyl-linoleoyl-glycerol (16:0/18:2) [2]*	43	TRUE	2.39241	0.261706	-0.0297749	-0.0636169	-0.243668	-0.00854721	-0.0096505	0.0057064	0.240448	0.938771	0.66901	0.232291	0.517413	0.598056	0.757797
303	LDL	sphingomyelin (d18:1/21:0, d17:1/22:0, d16:1/23:0)*	45	TRUE	4.82182	-1.01985	-0.358756	0.895624	1.15653	-0.00749057	-0.0818133	0.00070401	0.241757	0.597119	0.20731	0.210001	0.717449	0.00855519	0.757797
432	Glucose	1,2-dipalmitoyl-GPC (16:0/16:0)	54	TRUE	4.43218	0.927227	-0.160539	0.328656	-0.918759	-0.0138053	0.0415756	0.000716438	0.254778	0.74503	0.498977	0.255258	0.463768	0.141596	0.757797
492	LDL	1-stearoyl-2-docosapentaenoyl-GPC (18:0/22:5n6)*	44	TRUE	5.82093	-0.476032	-0.324666	-0.104309	0.517873	-0.0118648	-0.0741244	0.000266588	0.41751	0.676647	0.70425	0.254979	0.642351	0.0611088	0.757797
92	Glucose	galactonate	46	TRUE	4.55625	0.160128	-0.434701	0.074284	-0.218104	-0.0125709	0.0467331	0.000347062	0.59359	0.407236	0.521301	0.25489	0.545981	0.182773	0.757797
406	Tot-cholesterol	isobutyrylcarnitine (C4)	45	TRUE	9.54378	0.877282	-0.590905	-0.504131	-0.516145	-0.0415977	-0.0521046	2.43702e-10	0.158422	0.456119	0.110646	0.25371	0.10646	0.14484	0.757797
235	Glucose	1-palmitoyl-2-oleoyl-GPC (16:0/18:1)	54	TRUE	3.75131	0.979089	-0.228753	0.389078	-1.00378	-0.00542882	0.0445953	0.00651532	0.250431	0.639796	0.310082	0.253152	0.779596	0.121924	0.757797
169	HDL	3-methyl-2-oxovalerate	45	TRUE	1.63078	0.525665	0.0108963	0.351358	-0.340586	-0.00143559	-0.0189166	0.0406478	0.266636	0.97773	0.185253	0.251932	0.904456	0.288693	0.757797
274	Glucose	1-myristoyl-2-linoleoyl-GPC (14:0/18:2)*	54	TRUE	4.87835	0.539541	-0.210832	-0.121502	-0.64884	-0.0151526	0.0442718	6.14867e-05	0.276718	0.662973	0.70743	0.251093	0.415464	0.126992	0.757797
491	Triglycerides	methylsuccinate	50	TRUE	0.0270372	-0.266196	-0.201718	-0.212064	0.469351	-0.0193468	0.0895946	0.980342	0.568566	0.723813	0.398884	0.249005	0.144685	0.00163606	0.757797
73	Glucose	1-stearoyl-2-docosahexaenoyl-GPE (18:0/22:6)*	54	TRUE	3.13647	0.601234	-0.216485	0.62783	-0.492226	-0.00465627	0.0542205	0.0100349	0.177142	0.635594	0.00346098	0.248684	0.791491	0.0441279	0.757797
128	Glucose	sphingomyelin (d18:1/20:1, d18:2/20:0)*	54	TRUE	3.63105	1.24895	-0.0994085	1.06767	-1.38233	-0.0123958	0.0449313	0.00965683	0.240233	0.841748	0.216483	0.245173	0.502851	0.111252	0.757797
286	LDL	sphingosine	36	TRUE	5.48963	-0.516655	-0.24245	-0.23486	0.715704	-0.0120365	-0.0596167	0.00511732	0.420216	0.773819	0.56975	0.244486	0.66115	0.154237	0.757797
233	Glucose	oleoyl-linoleoyl-glycerol (18:1/18:2) [1]	54	TRUE	3.59176	0.465938	-0.229747	0.588448	-0.411515	-0.00891982	0.0491994	0.0033888	0.306015	0.624424	0.0242377	0.242506	0.619247	0.0779003	0.757797
124	LDL	4-methyl-2-oxopentanoate	45	TRUE	5.35314	1.06521	-0.265058	0.400683	-0.604192	-0.0148875	-0.0781491	0.000764608	0.233453	0.734464	0.349851	0.240187	0.547587	0.0288006	0.757797
447	LDL	palmitoyl-linoleoyl-glycerol (16:0/18:2) [2]*	43	TRUE	4.42813	-0.455754	-0.302423	0.313463	0.460696	0.0139863	-0.0977179	0.00754598	0.285736	0.683697	0.271326	0.238267	0.580154	0.00530907	0.757797
548	LDL	sphingomyelin (d18:2/16:0, d18:1/16:1)*	45	TRUE	4.18523	-1.09744	-0.188882	1.57284	1.26555	-0.00856003	-0.0778149	0.00551106	0.25075	0.767497	0.0512683	0.238018	0.668324	0.00912458	0.757797
552	Glucose	1-palmitoyl-2-eicosapentaenoyl-GPC (16:0/20:5)*	54	TRUE	4.24135	0.556659	-0.214492	0.127553	-0.44375	-0.0120644	0.0505379	0.000880549	0.255256	0.661345	0.573033	0.236653	0.51713	0.0783257	0.757797
37	HDL	sphingosine	36	TRUE	1.49042	0.334832	-0.0456951	0.181449	-0.339585	0.00127295	-0.00849505	0.102203	0.261354	0.907288	0.345047	0.235089	0.920604	0.662464	0.757797
174	Glucose	leucine	54	TRUE	5.36289	-1.51783	-0.178207	-0.674041	1.45177	-0.010824	0.0388235	0.000286943	0.248305	0.716991	0.451813	0.234621	0.559634	0.181812	0.757797
461	Triglycerides	1-myristoyl-2-palmitoyl-GPC (14:0/16:0)	50	TRUE	0.12795	-0.103488	-0.121086	-0.055573	0.368993	-0.0213405	0.0834969	0.905047	0.751319	0.828444	0.79824	0.233869	0.105963	0.00365279	0.757797
444	LDL	alpha-hydroxyisovalerate	45	TRUE	6.42353	0.962721	-0.292883	-0.14913	-0.77402	-0.0228389	-0.0687354	3.00685e-05	0.23012	0.703047	0.61754	0.233304	0.335677	0.0547285	0.757797
183	Glucose	1-palmitoyl-2-docosahexaenoyl-GPE (16:0/22:6)*	54	TRUE	3.3919	0.629429	-0.164977	0.481969	-0.546461	-0.00625097	0.0539397	0.00906899	0.179141	0.728923	0.0367136	0.231732	0.73208	0.0519485	0.757797
395	Glucose	isovalerylglycine	48	TRUE	5.45428	-0.686366	-0.204208	0.0144993	0.68824	-0.0202445	0.033062	7.80056e-05	0.196144	0.671014	0.973716	0.207603	0.318452	0.303919	0.757797
351	Triglycerides	2-hydroxy-3-methylvalerate	50	TRUE	0.557295	-0.263737	-0.233371	-0.142165	0.342091	-0.0255856	0.0828692	0.609337	0.535779	0.682215	0.307308	0.202755	0.0492453	0.00282199	0.757797
64	LDL	fumarate	45	TRUE	6.10743	-1.38361	-0.436446	-0.639764	1.39564	-0.00455144	-0.0836888	0.000152477	0.237789	0.578955	0.33755	0.205047	0.857497	0.0206275	0.757797
61	Tot-cholesterol	1-stearoyl-2-oleoyl-GPC (18:0/18:1)	45	TRUE	7.54224	-1.20165	-0.487411	0.543791	1.50711	-0.00709104	-0.0973719	4.35993e-05	0.234426	0.566356	0.172788	0.165192	0.797335	0.0155537	0.757797
283	HDL	sphingomyelin (d18:1/18:1, d18:2/18:0)	45	TRUE	2.05149	-0.721373	-0.0198679	0.244593	0.899532	-0.00263778	-0.0206956	0.019715	0.206299	0.956435	0.602194	0.164872	0.817688	0.220554	0.757797
472	Tot-cholesterol	sphingomyelin (d18:1/20:1, d18:2/20:0)*	45	TRUE	9.21673	-1.85027	-0.332219	0.335186	2.3871	-0.0350714	-0.0865006	3.41721e-06	0.224482	0.702423	0.793611	0.164446	0.173102	0.0272868	0.757797
547	Tot-cholesterol	3-methyl-2-oxobutyrate	45	TRUE	8.37591	1.34025	-0.280811	0.777247	-0.710234	-0.0328375	-0.0982949	1.56042e-06	0.150858	0.747163	0.0567342	0.163109	0.22386	0.0167442	0.757797
25	Triglycerides	phosphatidylcholine (16:0/22:5n3, 18:1/20:4)*	50	TRUE	-0.26685	-0.883413	-0.383836	0.753643	1.28105	-0.0252367	0.0777752	0.802606	0.301596	0.478324	0.0965631	0.160486	0.0340543	0.00180286	0.757797
519	LDL	1-stearoyl-2-linoleoyl-GPI (18:0/18:2)	45	TRUE	6.14374	-1.27045	-0.312065	-0.453012	1.47146	-0.014328	-0.0718638	0.000152631	0.176456	0.6854	0.537265	0.155562	0.539838	0.0422746	0.757797
10	Triglycerides	ribitol	50	TRUE	0.437221	-0.62555	-0.308312	-0.595379	0.82578	-0.020129	0.0902113	0.684641	0.389019	0.594107	0.214084	0.2062	0.12186	0.00341883	0.757797
179	HDL	1-myristoyl-2-linoleoyl-GPC (14:0/18:2)*	45	TRUE	1.24952	0.429137	0.0680631	0.601255	-0.548588	0.00892209	-0.0278661	0.106741	0.190089	0.855141	0.0175101	0.153417	0.447085	0.121802	0.757797
319	LDL	palmitoyl sphingomyelin (d18:1/16:0)	45	TRUE	1.98627	-1.41257	0.171126	2.56934	1.75344	-0.0123184	-0.0284386	0.225628	0.219604	0.773738	0.00489428	0.152258	0.494651	0.305478	0.757797
422	HDL	phosphatidylcholine (18:0/20:5, 16:0/22:5n6)*	45	TRUE	1.96451	0.52641	-0.0263889	0.0515359	-0.482727	-0.00384867	-0.00882031	0.0138821	0.177193	0.945388	0.787693	0.165535	0.749087	0.630301	0.757797
181	Tot-cholesterol	1-pentadecanoyl-2-linoleoyl-GPC (15:0/18:2)*	45	TRUE	7.35911	1.13432	0.242251	2.02768	-1.15985	-0.0336988	-0.0767895	3.29038e-06	0.146404	0.76502	0.00181231	0.148075	0.154939	0.0323925	0.757797
63	HDL	succinate	45	TRUE	1.15135	-0.985484	0.0772724	0.743553	1.31619	-0.00176517	-0.00176608	0.153703	0.151581	0.832338	0.200115	0.145268	0.868677	0.916305	0.757797
373	Glucose	sphingomyelin (d18:1/18:1, d18:2/18:0)	54	TRUE	3.00361	1.39763	-0.157079	1.42532	-1.54951	-0.00525875	0.0390507	0.0396661	0.143848	0.744493	0.0722603	0.145119	0.776735	0.160545	0.757797
531	Tot-cholesterol	sphingomyelin (d18:1/18:1, d18:2/18:0)	45	TRUE	9.30028	-1.64304	-0.327975	0.48093	2.16889	-0.0379272	-0.0879783	4.10036e-06	0.209725	0.694355	0.65516	0.144502	0.148652	0.023249	0.757797
54	Triglycerides	1-stearoyl-2-docosahexaenoyl-GPC (18:0/22:6)	50	TRUE	0.194708	-0.373157	-0.0367461	0.153121	0.678431	-0.0222113	0.0749558	0.855958	0.443172	0.946614	0.585697	0.142787	0.0727596	0.00412895	0.757797
535	Triglycerides	1-palmitoyl-2-arachidonoyl-GPC (16:0/20:4n6)	50	TRUE	0.395478	-0.575378	-0.389827	0.884782	0.910728	-0.0316673	0.0612202	0.676287	0.348571	0.429026	0.0155144	0.141865	0.00493827	0.00979644	0.757797
522	LDL	1-palmitoyl-2-palmitoleoyl-GPC (16:0/16:1)*	45	TRUE	5.13945	-0.904712	-0.347098	0.0465333	1.07048	-0.00124904	-0.0798938	0.00248989	0.195173	0.652703	0.839177	0.141862	0.962605	0.0250209	0.757797
429	Triglycerides	succinylcarnitine (C4-DC)	48	TRUE	-1.7929	-0.461888	0.316654	0.746459	0.500508	-0.0104648	0.05989	0.0111212	0.244755	0.361338	0.000243701	0.137001	0.174975	0.000460765	0.757797
482	Tot-cholesterol	2-hydroxy-3-methylvalerate	45	TRUE	8.69029	1.03361	-0.357903	0.241814	-0.642154	-0.0308074	-0.0788896	5.16666e-07	0.114605	0.685375	0.324148	0.134005	0.258179	0.0585618	0.757797
410	Triglycerides	1-palmitoyl-2-palmitoleoyl-GPC (16:0/16:1)*	50	TRUE	0.0479618	-0.292319	-0.11958	0.0704271	0.653158	-0.0171295	0.0728689	0.964048	0.462171	0.827303	0.628688	0.131936	0.192491	0.00723214	0.757797
155	LDL	alpha-hydroxyisocaproate	45	TRUE	6.06471	1.15662	-0.308428	0.328081	-0.842972	-0.0244871	-0.0748168	8.82664e-05	0.15019	0.690527	0.411036	0.14767	0.307754	0.0346897	0.757797
394	Tot-cholesterol	sphingosine 1-phosphate	45	TRUE	9.84714	-1.50885	-0.438592	-1.01432	1.85991	-0.0329075	-0.069424	3.66379e-07	0.222807	0.619466	0.19598	0.166354	0.23744	0.090365	0.757797
327	Tot-cholesterol	3-methylglutaconate	42	TRUE	9.45989	-1.02196	-0.646793	-0.634051	1.25128	-0.0309574	-0.0692077	1.83481e-07	0.22955	0.480145	0.170174	0.154623	0.264097	0.104431	0.757797
6	Tot-cholesterol	succinylcarnitine (C4-DC)	43	TRUE	9.23672	1.91783	-0.413385	-0.0792688	-1.52422	-0.0376837	-0.0668977	6.28163e-07	0.146522	0.666945	0.887304	0.171351	0.185346	0.109466	0.757797
161	LDL	1-pentadecanoyl-2-linoleoyl-GPC (15:0/18:2)*	45	TRUE	4.68616	0.82741	0.225785	1.61562	-0.910582	-0.0186921	-0.0741717	0.000943603	0.236951	0.75581	0.00552651	0.20493	0.378475	0.0210535	0.757797
28	Glucose	1,5-anhydroglucitol (1,5-AG)	54	TRUE	5.67829	-0.643956	-0.097196	-0.668014	0.688492	-0.0244983	0.0582331	8.90693e-05	0.224798	0.843766	0.128829	0.16644	0.238277	0.0481673	0.757797
205	LDL	1-stearoyl-2-docosapentaenoyl-GPC (18:0/22:5n3)*	45	TRUE	6.00454	-1.38573	-0.338697	0.00974931	1.41135	-0.00780822	-0.0949738	0.00046058	0.237249	0.66298	0.981632	0.202989	0.752259	0.0128672	0.757797
247	Tot-cholesterol	2-methylbutyrylcarnitine (C5)	45	TRUE	9.73317	1.22846	-0.394824	-0.135924	-0.826784	-0.0459721	-0.0635967	2.1182e-08	0.149257	0.659083	0.751148	0.201915	0.0917241	0.115517	0.757797
130	HDL	sphingomyelin (d18:1/24:1, d18:2/24:0)*	45	TRUE	0.962597	0.858072	0.0695213	0.699918	-0.884808	0.0061634	-0.0180708	0.328389	0.194277	0.859073	0.116711	0.200889	0.611863	0.316727	0.757797
411	LDL	3-methyl-2-oxovalerate	45	TRUE	5.23842	1.24094	-0.191135	0.600225	-0.771441	-0.0162783	-0.0796928	0.00103949	0.190908	0.807066	0.259026	0.195584	0.497244	0.0257946	0.757797
473	Glucose	choline	54	TRUE	6.10444	-1.6757	-0.256611	-1.58939	1.83295	-0.0146573	0.0481402	0.000443358	0.21655	0.599762	0.18637	0.195287	0.449513	0.088938	0.757797
330	Triglycerides	alpha-hydroxyisovalerate	50	TRUE	0.426708	-0.290398	-0.139057	-0.178853	0.388292	-0.0233307	0.0841855	0.690633	0.501262	0.801476	0.204988	0.18889	0.0758028	0.00236029	0.757797
445	Glucose	isoleucine	54	TRUE	5.21569	-1.49742	-0.18677	-0.554689	1.39385	-0.00997531	0.0377485	0.000184689	0.196543	0.702014	0.50773	0.186231	0.589057	0.194596	0.757797
397	Glucose	alpha-hydroxyisocaproate	54	TRUE	4.70179	-0.739906	-0.235122	-0.232251	0.592027	-0.0105046	0.0475563	0.000169614	0.226907	0.630177	0.4167	0.185448	0.573394	0.094817	0.757797
323	Tot-cholesterol	sphingomyelin (d18:1/21:0, d17:1/22:0, d16:1/23:0)*	45	TRUE	7.80223	-1.12317	-0.477977	0.878734	1.37123	-0.0209245	-0.0853049	2.70662e-06	0.269874	0.546719	0.289659	0.203364	0.386957	0.0189582	0.757797
485	LDL	ribonate	45	TRUE	5.80815	-0.690929	-0.332574	-0.188506	0.731584	-0.0155578	-0.0632072	0.000127982	0.26013	0.669256	0.608715	0.184545	0.505991	0.0839421	0.757797
13	LDL	mannitol/sorbitol	45	TRUE	5.96177	0.338472	-0.281414	0.00654372	-0.135041	-0.0158424	-0.0753432	0.000120905	0.318669	0.718292	0.876046	0.183933	0.522132	0.0339322	0.757797
493	HDL	sphingomyelin (d18:1/17:0, d17:1/18:0, d19:1/16:0)	45	TRUE	2.09972	-0.573135	-0.0651866	-0.0976688	0.643984	0.000159536	-0.0173884	0.0144737	0.21719	0.864757	0.786616	0.181754	0.989015	0.320803	0.757797
138	Glucose	1-stearoyl-2-linoleoyl-GPC (18:0/18:2)*	54	TRUE	3.68707	1.54931	-0.0544348	1.0441	-1.66135	-0.0138034	0.0451856	0.00651502	0.170788	0.91151	0.0932168	0.179357	0.462104	0.102419	0.757797
499	Glucose	oleoyl-linoleoyl-glycerol (18:1/18:2) [2]	54	TRUE	3.53554	0.573777	-0.152779	0.595527	-0.486935	-0.00928865	0.0514309	0.00397396	0.213208	0.745263	0.0186345	0.178205	0.605198	0.0647573	0.757797
526	Triglycerides	mannose	50	TRUE	-0.67422	0.972216	0.143575	0.989802	-0.699736	-0.0264312	0.08232	0.557913	0.112839	0.788506	0.0127052	0.175834	0.0356577	0.00141831	0.757797
329	Tot-cholesterol	4-methyl-2-oxopentanoate	45	TRUE	8.20832	1.45397	-0.336696	0.684034	-0.791797	-0.0335824	-0.082136	5.53044e-06	0.152139	0.704406	0.159939	0.175328	0.232301	0.0430564	0.757797
116	Glucose	behenoyl sphingomyelin (d18:1/22:0)*	54	TRUE	3.52784	1.20103	-0.0869528	0.94768	-1.25399	-0.00899763	0.0419217	0.0112328	0.164087	0.859898	0.141837	0.173262	0.626805	0.1329	0.757797
101	Glucose	sphingomyelin (d18:2/23:0, d18:1/23:1, d17:1/24:1)*	54	TRUE	3.79858	1.2546	-0.158246	0.85521	-1.39586	-0.0120632	0.0451709	0.00813229	0.172099	0.74644	0.268593	0.171654	0.518212	0.107076	0.757797
431	Tot-cholesterol	palmitoyl dihydrosphingomyelin (d18:0/16:0)*	45	TRUE	6.90504	-0.889026	-0.233668	1.53286	1.34942	-0.0344906	-0.0448706	1.55033e-05	0.338925	0.755199	0.011445	0.185147	0.128583	0.202552	0.757797
210	Triglycerides	glycerophosphoethanolamine	50	TRUE	0.502454	-0.217861	-0.196378	-0.345867	0.443574	-0.0261629	0.0922485	0.658736	0.589915	0.724512	0.151218	0.256872	0.0558004	0.00101157	0.758005
156	HDL	mannitol/sorbitol	45	TRUE	1.80344	0.125794	-0.081198	-0.00949755	-0.0569827	0.00296037	-0.0155236	0.0193961	0.456241	0.834253	0.649014	0.259672	0.809985	0.37968	0.758005
86	HDL	1-palmitoyl-2-linoleoyl-GPC (16:0/18:2)	45	TRUE	0.448136	0.641674	0.224037	1.16286	-0.702621	0.00864849	-0.0196452	0.587203	0.275445	0.53721	0.00217017	0.259873	0.42946	0.227668	0.758005
405	Glucose	sphingomyelin (d18:2/16:0, d18:1/16:1)*	54	TRUE	3.75654	0.986112	-0.210465	0.789064	-1.09439	-0.00783781	0.0386023	0.00850548	0.260077	0.667591	0.289993	0.260647	0.679918	0.178313	0.758005
368	Glucose	stearoyl sphingomyelin (d18:1/18:0)	54	TRUE	2.92443	1.08324	-0.0793201	1.38882	-1.11325	-0.00455515	0.038822	0.0439351	0.250669	0.86956	0.0529089	0.268176	0.804915	0.161877	0.7605
340	Triglycerides	sphingosine	44	TRUE	-1.37538	0.849887	0.0599726	0.445769	-0.406528	-0.00640089	0.0835063	0.307387	0.0661886	0.918588	0.0701987	0.267969	0.69467	0.00580042	0.7605
170	Tot-cholesterol	phosphatidylcholine (16:0/22:5n3, 18:1/20:4)*	45	TRUE	8.92447	-1.38466	-0.397826	0.54852	1.50365	-0.0344566	-0.0868354	4.55144e-06	0.32507	0.645097	0.499049	0.266892	0.192242	0.0288672	0.7605
18	Tot-cholesterol	1-palmitoyl-2-oleoyl-GPC (16:0/18:1)	45	TRUE	7.46143	-1.3668	-0.39072	0.826143	1.57018	-0.0137087	-0.089973	0.000148777	0.315412	0.646164	0.14811	0.26704	0.618981	0.0219858	0.7605
85	Triglycerides	isoleucine	50	TRUE	0.722557	-0.964504	-0.127986	-0.628312	1.10182	-0.0210512	0.0839522	0.543358	0.374314	0.818931	0.47381	0.267596	0.110091	0.00405354	0.7605
11	Glucose	phosphate	54	TRUE	5.9211	-3.34006	-0.256061	-1.66272	3.41259	-0.0100347	0.0502781	0.0158171	0.276687	0.603526	0.412932	0.271227	0.611503	0.0809558	0.765344
501	Glucose	phosphatidylcholine (18:0/20:5, 16:0/22:5n6)*	54	TRUE	4.33629	0.597955	-0.226867	0.119496	-0.528543	-0.0131384	0.0503985	0.000773621	0.30615	0.645367	0.69719	0.297723	0.484219	0.0815472	0.767883
260	Tot-cholesterol	1-stearoyl-2-linoleoyl-GPE (18:0/18:2)*	45	TRUE	7.97553	0.75155	-0.315204	0.418007	-0.662038	-0.020312	-0.0797664	0.000133539	0.255468	0.723921	0.254301	0.2973	0.533638	0.0597039	0.767883
57	HDL	3-methylglutaconate	42	TRUE	2.37183	-0.385972	-0.131711	-0.196168	0.39835	-0.00264983	-0.0160628	0.00263236	0.296589	0.740858	0.329008	0.297276	0.825972	0.38603	0.767883
399	HDL	fumarate	45	TRUE	1.77983	0.604518	0.0217806	0.388161	-0.574869	-0.00424351	-0.0124927	0.027346	0.302418	0.955845	0.244683	0.296627	0.737834	0.489659	0.767883
78	Glucose	palmitoyl dihydrosphingomyelin (d18:0/16:0)*	54	TRUE	3.52133	0.794358	-0.0474957	0.900363	-0.815494	-0.0102994	0.0479703	0.00724961	0.27442	0.922714	0.0683748	0.296145	0.572251	0.0842692	0.767883
51	Glucose	1-stearoyl-2-arachidonoyl-GPI (18:0/20:4)	54	TRUE	4.06465	0.724204	-0.352671	0.63359	-0.674214	-0.0106692	0.0355727	0.00150958	0.327071	0.476226	0.136912	0.293341	0.573648	0.213915	0.767883
102	HDL	1-stearoyl-2-linoleoyl-GPI (18:0/18:2)	45	TRUE	2.1992	0.550029	-0.0491804	-0.0644663	-0.541078	-0.00145405	-0.0188147	0.00632025	0.238416	0.897663	0.859612	0.292795	0.90026	0.284127	0.767883
452	HDL	glycerate	45	TRUE	2.01141	-0.532932	0.0151107	0.18196	0.704712	-0.00298851	-0.0149732	0.00924979	0.296644	0.96993	0.671353	0.292308	0.797385	0.392396	0.767883
336	Glucose	1-palmitoyl-2-linoleoyl-GPI (16:0/18:2)	53	TRUE	4.5867	0.483388	-0.214962	0.09794	-0.525258	-0.0125378	0.0416263	0.00028523	0.311387	0.665349	0.734636	0.289636	0.514629	0.157835	0.767883
204	Tot-cholesterol	1-stearoyl-2-docosahexaenoyl-GPC (18:0/22:6)	45	TRUE	7.44564	1.27346	-0.194952	0.864214	-0.99253	-0.029276	-0.0600918	9.39981e-05	0.21475	0.825398	0.0847536	0.29015	0.268595	0.151173	0.767883
356	Tot-cholesterol	sphingomyelin (d18:2/24:1, d18:1/24:2)*	45	TRUE	7.17616	-1.16392	-0.231574	0.922316	1.41675	-0.0220578	-0.063276	0.000499355	0.357544	0.787306	0.279088	0.288446	0.406297	0.107506	0.767883
114	Tot-cholesterol	sphingomyelin (d18:2/14:0, d18:1/14:1)*	45	TRUE	8.00852	-0.825789	0.178074	1.71516	1.20342	-0.0233274	-0.109812	3.88849e-08	0.379996	0.823672	0.0441519	0.284973	0.29721	0.00257581	0.767883
505	Glucose	sphingomyelin (d18:2/14:0, d18:1/14:1)*	54	TRUE	4.41337	0.795828	-0.122251	0.521627	-0.949737	-0.0140191	0.0389397	0.000322569	0.284633	0.808298	0.447871	0.284617	0.45512	0.199663	0.767883
386	Tot-cholesterol	sphingomyelin (d18:1/17:0, d17:1/18:0, d19:1/16:0)	45	TRUE	8.07229	-0.869465	-0.337335	0.7561	1.11947	-0.0271806	-0.0779027	1.34749e-05	0.386105	0.683232	0.331935	0.282509	0.277485	0.039471	0.767883
546	Tot-cholesterol	1-palmitoyl-2-palmitoleoyl-GPC (16:0/16:1)*	45	TRUE	7.02287	-0.658545	-0.407466	0.406083	0.881315	-3.81571e-05	-0.0907562	0.000218913	0.39907	0.636613	0.113225	0.279472	0.998978	0.022804	0.767883
358	Glucose	1-stearoyl-2-docosapentaenoyl-GPC (18:0/22:5n6)*	53	TRUE	5.1667	-0.409033	-0.163287	-0.29104	0.388481	-0.0174464	0.0479183	5.72596e-05	0.350592	0.740895	0.183564	0.278418	0.371289	0.122492	0.767883
200	LDL	isovalerylcarnitine (C5)	45	TRUE	5.93174	0.686107	-0.247021	0.204616	-0.454998	-0.0189994	-0.075845	0.000110389	0.266183	0.751773	0.534671	0.27758	0.430439	0.0400273	0.767883
464	LDL	arabonate/xylonate	45	TRUE	5.88524	-0.607798	-0.243672	-0.292458	0.673273	-0.0155443	-0.0629021	9.21963e-05	0.351718	0.755717	0.506346	0.274487	0.509802	0.0959512	0.767883
118	HDL	trimethylamine N-oxide	45	TRUE	2.03104	-0.157599	-0.182396	-0.158563	0.144732	0.00286819	-0.0174753	0.00597543	0.502617	0.644862	0.151634	0.289291	0.807808	0.32762	0.767883
36	Glucose	citrate	54	TRUE	4.49425	-0.570393	-0.205523	-0.321991	0.580519	-0.00892645	0.0520384	0.00020309	0.349991	0.676181	0.439067	0.300316	0.636303	0.0774231	0.769659
360	LDL	3-methyl-2-oxobutyrate	45	TRUE	5.5767	0.846899	-0.21524	0.482674	-0.46879	-0.0170816	-0.0878652	0.000341739	0.309378	0.781992	0.18515	0.302583	0.478597	0.0166308	0.769659
230	LDL	1-stearoyl-2-docosahexaenoyl-GPE (18:0/22:6)*	45	TRUE	5.77998	0.621899	-0.219113	0.134465	-0.584417	-0.0188842	-0.0666285	0.000606795	0.306124	0.781084	0.654264	0.304346	0.44628	0.0707879	0.769659
322	HDL	1-palmitoyl-2-arachidonoyl-GPI (16:0/20:4)*	43	TRUE	1.54266	0.312391	-0.0791917	0.218506	-0.291831	0.00722027	-0.0245346	0.0742361	0.35151	0.838885	0.242344	0.305118	0.582226	0.182338	0.769659
50	Glucose	1-stearoyl-2-docosapentaenoyl-GPC (18:0/22:5n3)*	54	TRUE	4.06306	0.703343	-0.276186	0.121673	-0.656412	-0.00854442	0.0495469	0.00324596	0.311084	0.582884	0.71097	0.305163	0.654621	0.0864732	0.769659
490	LDL	1-stearoyl-2-dihomo-linolenoyl-GPC (18:0/20:3n3 or 6)*	45	TRUE	5.52283	-0.707325	-0.334405	0.35758	0.807975	-0.00348178	-0.100611	0.000365	0.379489	0.660641	0.367397	0.306884	0.885235	0.00729421	0.77059
500	Tot-cholesterol	ribonate	45	TRUE	8.75102	-0.51409	-0.423549	-0.0968906	0.647783	-0.0303353	-0.0660661	5.85521e-07	0.468247	0.637675	0.819819	0.309107	0.261587	0.117863	0.772768
196	LDL	pyruvate	45	TRUE	5.9329	-0.661476	-0.304064	-0.0853742	0.283025	-0.0122149	-0.0749241	9.35739e-05	0.387135	0.69757	0.504878	0.310681	0.612289	0.0377214	0.773312
75	Tot-cholesterol	methylsuccinate	45	TRUE	8.47164	-0.516257	-0.397843	0.0645627	0.566744	-0.0249154	-0.0746284	9.20482e-07	0.488066	0.659361	0.853612	0.316248	0.357645	0.0713337	0.778549
400	LDL	N-acetylvaline	45	TRUE	6.09114	-0.999025	-0.306823	-0.436835	0.993798	-0.009551	-0.0782789	4.65018e-05	0.35419	0.694979	0.556401	0.317495	0.702152	0.0332856	0.778549
346	HDL	isovalerylcarnitine (C5)	45	TRUE	2.05704	0.330285	-0.03628	0.0160294	-0.206791	-0.00275849	-0.0132762	0.00668646	0.278976	0.925139	0.92163	0.318227	0.816899	0.467208	0.778549
299	HDL	alpha-hydroxyisocaproate	45	TRUE	1.65309	0.414753	-0.108532	0.314983	-0.287993	-0.000683213	-0.0179923	0.0314953	0.299099	0.777981	0.112204	0.319522	0.95433	0.306717	0.778549
528	Glucose	fructose	54	TRUE	3.28713	0.873931	-0.174052	1.00687	-0.834492	-0.00709451	0.0417139	0.0152849	0.326972	0.716853	0.0606332	0.319615	0.698342	0.135344	0.778549
555	Triglycerides	1-stearoyl-2-dihomo-linolenoyl-GPC (18:0/20:3n3 or 6)*	50	TRUE	-0.528079	-0.0212333	-0.197233	0.774184	0.352876	-0.0103992	0.0533935	0.538582	0.952955	0.654183	3.24213e-05	0.327813	0.322633	0.0148436	0.792676
31	Tot-cholesterol	N-acetylisoleucine	44	TRUE	9.69765	-0.741439	-0.297845	-0.514143	0.921719	-0.0281734	-0.0918535	6.71165e-08	0.502773	0.736958	0.348367	0.329384	0.373626	0.0284284	0.792676
166	Tot-cholesterol	1-palmitoyl-2-linoleoyl-GPE (16:0/18:2)	45	TRUE	8.05524	0.765894	-0.293134	0.384437	-0.662562	-0.0208041	-0.0805153	0.000152587	0.285887	0.742796	0.254689	0.32994	0.523037	0.0510966	0.792676
437	Triglycerides	1-palmitoyl-2-oleoyl-GPC (16:0/18:1)	50	TRUE	-0.178021	-0.441999	-0.224622	0.306913	0.726491	-0.0173343	0.0732528	0.879879	0.543592	0.691312	0.390829	0.330977	0.195267	0.00641678	0.792676
402	HDL	lactate	45	TRUE	2.37594	0.624677	-0.0235064	-0.0304775	-0.578578	-0.0062996	-0.0149925	0.00959902	0.314634	0.951957	0.927583	0.336672	0.628677	0.403525	0.800081
93	Tot-cholesterol	3-hydroxy-2-ethylpropionate	45	TRUE	9.12126	-0.649859	-0.108059	0.55856	0.70593	-0.0460883	-0.0706057	4.05242e-08	0.469464	0.900537	0.261417	0.336876	0.0772508	0.0688527	0.800081
468	Triglycerides	1-myristoyl-2-linoleoyl-GPC (14:0/18:2)*	50	TRUE	0.186094	-0.114566	-0.0544629	0.189596	0.429559	-0.0179851	0.0660251	0.85994	0.777299	0.921574	0.442982	0.338398	0.166683	0.0253262	0.80036
434	HDL	1-oleoyl-2-dihomo-linolenoyl-GPC (18:1/20:3)*	45	TRUE	1.47761	0.242496	-0.0468638	0.25461	-0.240744	0.0051636	-0.0188442	0.0586062	0.361663	0.901711	0.066249	0.348035	0.663153	0.279961	0.803157
516	HDL	1-stearoyl-2-docosapentaenoyl-GPC (18:0/22:5n3)*	45	TRUE	1.25584	0.570796	-0.0997947	0.348529	-0.514988	0.00359885	-0.0122612	0.137397	0.323537	0.794566	0.095108	0.346191	0.767971	0.514919	0.803157
193	Tot-cholesterol	1-margaroyl-2-linoleoyl-GPC (17:0/18:2)*	45	TRUE	7.418	1.01283	0.0411847	1.72609	-0.985762	-0.0353817	-0.0664757	2.85566e-05	0.332854	0.962254	0.0297203	0.347443	0.168312	0.0908783	0.803157
60	Glucose	1,2-dilinoleoyl-GPC (18:2/18:2)	54	TRUE	4.46338	0.541552	-0.180242	0.261999	-0.54629	-0.0140828	0.0445619	0.000364025	0.353302	0.715049	0.457344	0.344218	0.455284	0.115553	0.803157
509	LDL	sphingomyelin (d18:1/18:1, d18:2/18:0)	45	TRUE	6.03981	-0.987095	-0.231611	0.450174	1.27179	-0.0201802	-0.0825899	0.000981866	0.406416	0.759815	0.645108	0.345834	0.397187	0.0189239	0.803157
451	Triglycerides	N-acetylisoleucine	49	TRUE	0.00597079	-0.311971	-0.0884222	0.0303814	0.483499	-0.0224858	0.0873501	0.996004	0.58503	0.877926	0.928937	0.341353	0.085592	0.00178215	0.803157
202	Tot-cholesterol	1,5-anhydroglucitol (1,5-AG)	45	TRUE	8.05718	0.93234	-0.441103	0.701391	-0.775132	-0.0219381	-0.0907876	0.000203357	0.293938	0.624351	0.360899	0.350812	0.47434	0.0353669	0.806303
[truncated: 322 more rows]

## Sheet: F_Bio_Young
	col1	col2	n	converged	Intercept	C(Model_Health)[T.Bio_Young]	Statin_User[T.Yes]	analyte2	analyte2:C(Model_Health)[T.Bio_Young]	Age	BMI	Intercept_p	C(Model_Health)[T.Bio_Young]_p	Statin_User[T.Yes]_p	analyte2_p	analyte2:C(Model_Health)[T.Bio_Young]_p	Age_p	BMI_p	pval_adj
[truncated: 575 more rows]

[truncated: 6 more sheets: F_Bio_Old, M_Bio_Young, M_Bio_Old, e2_allele_dose, e4_allele_dose, delta_age]
